# Supplementary material for: Nanos promotes epigenetic reprograming of the germline by down-regulation of the THAP transcription factor LIN-15B
Source: eLife. 2017 Nov 7;6:e30201. doi: 10.7554/eLife.30201 (PMC5734877; doi:10.7554/eLife.30201)
Supplement: Supplementary file 1. — These categories were based on previously published data sets as described in methods section. [file elife-30201-supp1.xlsx]

## Sheet: Supp_table_S1_v1_list_of_genes_
Table S1. Gene categories.
Pregamete	Oocyte	Sperm	Soma specific
3R5.1	2L52.1	AC7.3	AH9.6
6R55.2	2RSSE.1	AH10.1	B0024.3
B0001.2	AH9.3	AH10.3	B0205.13
B0001.3	B0001.6	AH6.3	B0205.14
B0001.7	B0035.6	B0034.4	B0250.2
B0019.2	B0041.3	B0041.1	B0250.8
B0024.10	B0212.3	B0207.1	B0261.1
B0024.11	B0228.6	B0207.11	B0272.4
B0024.13	B0250.4	B0207.7	B0280.7
B0035.1	B0272.3	B0207.9	B0284.2
B0035.11	B0281.5	B0212.4	B0310.6
B0035.12	B0303.14	B0218.5	B0336.11
B0035.15	B0303.7	B0218.7	B0336.12
B0035.16	B0304.2	B0244.9	B0348.2
B0035.3	B0304.4	B0252.5	B0379.1
B0205.1	B0336.5	B0261.5	B0399.1
B0205.9	B0361.7	B0261.6	B0403.6
B0207.2	B0365.1	B0261.8	B0412.3
B0207.6	B0393.3	B0273.1	B0462.4
B0238.11	B0393.5	B0280.1	B0507.10
B0238.9	B0393.6	B0286.1	B0507.6
B0273.3	B0395.3	B0302.5	B0507.8
B0280.10	B0416.4	B0303.11	B0507.9
B0280.9	B0416.5	B0303.3	B0511.12
B0285.1	B0432.7	B0334.10	B0511.13
B0285.4	B0454.9	B0361.11	B0513.5
B0303.15	C01B12.2	B0379.2	BE0003N10.3
B0334.4	C01F1.6	B0379.7	BE10.2
B0336.3	C01G12.1	B0393.4	C01A2.2
B0336.7	C01G5.5	B0393.9	C01A2.3
B0361.2	C01G6.3	B0403.3	C01B10.10
B0361.6	C01G6.5	B0403.5	C01B10.4
B0391.10	C01G8.1	B0457.4	C01B10.6
B0414.8	C02B10.2	B0457.6	C01B10.7
B0432.10	C02B8.6	B0496.1	C01C10.2
B0464.2	C02F12.8	B0496.2	C01F4.2
B0464.6	C02F5.12	B0496.6	C01G10.9
B0464.9	C03A3.2	B0511.11	C01G6.7
B0491.1	C03B1.7	B0513.6	C02B10.5
B0491.7	C03H12.1	B0524.2	C02D5.2
B0495.9	C04A11.2	B0524.3	C02E7.6
B0511.7	C04B4.2	B0524.4	C02E7.7
B0513.2	C04F12.1	B0524.5	C02F12.3
B0546.2	C05C10.5	B0563.6	C02F5.3
B0564.7	C05D10.1	BE10.1	C02H7.2
BE0003N10.1	C05D2.6	C01B10.11	C03A3.1
C01B10.3	C05D9.7	C01B12.4	C03B1.14
C01B10.8	C05E11.3	C01F1.3	C03E10.3
C01B12.8	C05G5.2	C01G10.1	C04C11.2
C01F1.1	C06A6.2	C01G10.14	C05A9.2
C01F6.1	C06A6.5	C01G12.13	C05C12.4
C01G10.7	C06B3.6	C01G12.3	C05C8.7
C01G10.8	C06E1.1	C01G12.8	C05C8.9
C01G5.6	C06E2.5	C01G12.9	C05D10.2
C01G5.8	C06E7.4	C01G5.3	C05D10.4
C01H6.9	C06G3.6	C01G5.4	C05D11.13
C02B10.4	C06H2.6	C01G6.2	C05D9.3
C02F4.5	C06H2.7	C01G8.6	C05E11.7
C02F5.6	C07A9.9	C01H6.6	C05G5.3
C03D6.6	C07D10.5	C02B10.3	C05G5.4
C03H5.3	C07D8.6	C02B8.1	C05G5.5
C04C3.4	C07E3.6	C02C6.3	C06A5.1
C04E6.11	C08A9.6	C02F5.10	C06A8.8
C04F12.5	C08B11.3	C02F5.2	C06B3.7
C04F5.8	C08F8.3	C02F5.5	C06B8.7
C04F5.9	C09B8.5	C03B8.3	C06E4.2
C04H5.1	C09E7.4	C03C10.2	C06E4.8
C04H5.7	C09E8.1	C03C11.1	C06E7.2
C05C10.7	C09F5.1	C03F11.4	C06G1.1
C05C8.2	C10G11.7	C03H5.5	C06G3.5
C05C8.5	C10H11.8	C04E6.7	C06G8.1
C05C8.6	C11D2.4	C04F12.12	C06H2.3
C05D11.9	C11D9.1	C04F12.6	C07A12.7
C05D2.10	C11H1.2	C04F12.7	C07A4.1
C06A5.3	C11H1.3	C04G2.5	C07B5.4
C06A5.6	C11H1.8	C04G2.9	C07C7.1
C06A5.8	C13C4.6	C04G6.6	C07D10.1
C06A8.2	C13G5.2	C05C12.1	C07E3.3
C06E7.1	C14A4.3	C05C12.5	C07G3.2
C06G3.8	C14B1.2	C05D11.5	C07H6.3
C06G4.1	C14B1.9	C05D2.3	C08F1.10
C06G4.5	C14C10.6	C06A1.3	C08F1.11
C07A9.2	C14F11.1	C06A12.3	C08F1.8
C07H6.4	C14H10.2	C06A5.12	C08G9.2
C08B11.8	C15B12.6	C06A5.2	C09B7.2
C08B11.9	C15C7.1	C06A6.7	C09B9.8
C08B6.7	C15C8.4	C06A8.6	C09E7.7
C08B6.8	C15H9.5	C06C3.10	C09E7.8
C08C3.4	C16A3.2	C06C3.8	C09G5.8
C08F8.2	C16C8.12	C06C6.8	C10A4.3
C09D4.4	C16C8.5	C06E1.7	C10B5.3
C09E7.6	C16D9.6	C06G1.5	C10C5.2
C10B5.1	C16E9.2	C06G4.4	C10F3.4
C12D8.1	C16H3.3	C07A9.13	C11E4.1
C13F10.2	C17E4.3	C07E3.4	C11E4.6
C13F10.6	C17E7.12	C07E3.9	C11H1.7
C13F10.7	C17E7.4	C07G1.6	C12D12.5
C14A4.11	C17G1.4	C07G1.7	C13B9.1
C14B1.5	C17H11.2	C07H4.1	C13E3.1
C14B1.8	C18B12.4	C07H6.9	C13G3.1
C14C11.2	C18B12.6	C08B6.6	C14A11.2
C15C6.4	C18C4.5	C08F11.10	C14A11.5
C15H11.8	C18E3.2	C08F11.7	C14A4.6
C15H11.9	C18E3.3	C08F8.4	C14A4.9
C16A11.3	C18F3.4	C08F8.6	C14B1.6
C16A11.4	C23F12.4	C08G9.1	C14B4.2
C16A11.5	C24A1.2	C08H9.15	C14C11.7
C16A3.4	C24D10.5	C09B9.2	C14C6.5
C16A3.6	C24H10.2	C09D4.1	C14F11.6
C16C10.1	C24H12.5	C09D4.3	C14F11.7
C16C10.2	C25A1.12	C09F9.2	C14H10.3
C16C10.3	C25A1.5	C09F9.3	C15C6.1
C16C10.4	C25A11.2	C09G4.2	C15C7.5
C16C8.11	C25F6.1	C09G5.7	C15C7.7
C16C8.13	C26B9.1	C09H10.9	C15C8.5
C16C8.14	C26E6.7	C10C6.3	C15H9.11
C16C8.16	C27A7.6	C10C6.7	C15H9.2
C16C8.4	C27C12.1	C10G11.1	C16B8.3
C17C3.15	C27C12.3	C10G11.10	C16B8.4
C17E4.10	C27C12.4	C10G11.9	C16C4.17
C17E4.4	C27D9.1	C10G8.8	C16D9.1
C17E4.6	C28C12.2	C10H11.7	C17C3.1
C17E7.9	C28H8.1	C11E4.7	C17E4.2
C17F4.8	C29G2.1	C12C8.2	C17E7.13
C17G10.1	C29G2.2	C12D8.9	C17F4.7
C17G10.2	C29H12.2	C13C4.4	C17G1.5
C17H11.4	C30F12.4	C13C4.5	C17H1.10
C17H12.13	C31C9.2	C14A4.12	C17H1.14
C18A3.1	C31E10.5	C14A4.13	C17H1.3
C18A3.3	C31E10.6	C14A4.8	C17H1.4
C18E3.5	C31G12.1	C14A6.13	C17H1.6
C18E3.9	C31H1.8	C14A6.5	C17H1.7
C18E9.6	C31H5.4	C14A6.6	C17H11.5
C18H2.2	C32A3.3	C14A6.7	C18A11.1
C23G10.7	C32D5.7	C14B1.3	C18A3.10
C23G10.8	C33A11.2	C14B9.3	C18A3.9
C23H3.5	C33D9.6	C14C10.1	C18B2.5
C24D10.4	C33D9.9	C14C11.1	C18D11.1
C24D10.6	C33G3.6	C14F11.2	C18D11.3
C24F3.2	C34C6.2	C14H10.1	C18D11.7
C24G6.8	C34D10.1	C15A11.2	C18E9.5
C24H11.5	C34E10.8	C15C6.2	C18E9.7
C25A1.4	C34F6.5	C15F1.1	C18E9.9
C25A1.6	C34F6.9	C15H11.1	C18G1.1
C25A11.1	C34G6.1	C15H11.13	C18H9.1
C25A8.4	C34H4.5	C15H7.3	C23H3.3
C25H3.4	C35B8.3	C15H7.4	C23H3.9
C25H3.6	C35C5.3	C15H9.9	C23H5.8
C26E6.6	C35C5.6	C16A11.7	C24A3.4
C26F1.3	C35D10.13	C16A3.10	C24A8.6
C27A12.2	C35E7.1	C16C10.13	C24B5.1
C27A12.6	C35E7.5	C16C8.18	C24G6.2
C27A12.7	C35E7.6	C16D2.1	C24H10.1
C27A2.1	C36A4.5	C16D9.5	C24H12.1
C27B7.5	C36B1.9	C17C3.11	C24H12.11
C27F2.7	C36B7.6	C17C3.5	C24H12.12
C27H6.3	C36C9.1	C17C3.6	C25D7.10
C28A5.1	C36E6.1	C17C3.9	C25D7.15
C28A5.2	C36E6.2	C17D12.5	C25D7.5
C28H8.2	C37E2.1	C17E4.1	C25E10.5
C28H8.9	C39B5.2	C17F3.1	C25F6.7
C29A12.1	C39E9.12	C17G1.7	C25F9.10
C29F9.12	C39F7.2	C17G10.3	C25G4.3
C29H12.5	C41D11.5	C17H12.12	C25H3.7
C30A5.3	C41D11.7	C17H12.3	C25H3.8
C30B5.4	C41D11.9	C18A3.4	C26B2.8
C30C11.1	C41H7.3	C18A3.7	C26B9.6
C30G12.3	C41H7.4	C18D4.6	C26C6.9
C30G12.6	C41H7.5	C18E3.1	C26D10.4
C31G12.4	C41H7.6	C18E9.8	C26D10.6
C32D5.10	C43H6.3	C18G1.3	C26E6.12
C32D5.11	C43H6.4	C18G1.9	C26F1.1
C32E8.5	C43H6.7	C18H2.1	C27A12.4
C32H11.7	C44B11.6	C18H2.3	C27A12.9
C33C12.9	C44B7.11	C18H2.4	C27A2.8
C33F10.4	C44B7.12	C18H2.5	C27B7.7
C33H5.17	C44B9.1	C18H7.7	C27D6.12
C33H5.6	C44B9.3	C23G10.1	C27F2.1
C33H5.7	C44C1.2	C24A1.3	C27F2.8
C33H5.8	C44C10.4	C24A11.1	C28C12.4
C34C12.2	C44H4.4	C24A3.2	C28G1.4
C34D4.10	C45G7.4	C24D10.1	C28G1.5
C34G6.5	C45H4.14	C24D10.2	C28H8.11
C35D10.10	C46C11.1	C24H11.2	C29F3.7
C35D10.7	C46E10.8	C24H12.6	C29F5.1
C36A4.4	C46F11.3	C25A8.2	C29F7.2
C36B1.11	C46F11.6	C25A8.5	C29F7.3
C36B1.8	C46H3.2	C25D7.12	C29F9.1
C36F7.2	C47F8.1	C25E10.12	C29F9.3
C37A2.6	C47G2.4	C25E10.8	C29G2.3
C37A2.8	C48B6.9	C25G4.6	C30F12.6
C37A5.7	C49A9.10	C25G4.7	C30G12.4
C37C3.1	C49C3.15	C25G4.8	C30H6.10
C37C3.9	C49C3.5	C25H3.1	C30H6.12
C37H5.5	C49C3.8	C25H3.16	C30H6.9
C38D4.1	C49F5.3	C26B2.2	C32E12.4
C38D4.4	C49F5.6	C26C6.10	C32E8.11
C39E9.11	C49H3.6	C26C6.6	C32E8.6
C41D11.3	C50B6.3	C26E1.3	C32F10.4
C41G7.3	C50D2.7	C26E6.1	C33A12.19
C42C1.15	C50E3.11	C26H9A.2	C33A12.4
C42C1.8	C50E3.12	C27A2.7	C33D9.3
C43E11.9	C50E3.13	C27A7.1	C33D9.5
C44B12.1	C50E3.5	C27B7.6	C33D9.8
C44B7.1	C50F2.2	C27D6.11	C34B2.11
C44B7.10	C50F7.6	C27D6.3	C34C12.5
C44B7.2	C50H11.1	C27D8.1	C34D10.2
C44B7.5	C52A10.3	C27D8.2	C34D4.1
C44E4.4	C52B9.4	C27D8.3	C34E7.4
C44E4.5	C52E12.4	C27F2.6	C34F6.7
C45B2.1	C53D6.6	C27H5.2	C34F6.8
C45G9.2	C55B6.1	C28A5.6	C34H4.2
C46A5.5	C55C3.5	C28C12.1	C35A5.6
C46A5.6	C56A3.4	C28C12.11	C35B1.5
C46H11.1	C56C10.10	C28D4.4	C35B8.4
C47A4.1	CC8.2	C28D4.5	C35D10.12
C47B2.2	D1005.1	C28D4.7	C35E7.11
C47D12.2	D1007.15	C28D4.8	C35E7.2
C47D12.8	D1007.5	C28F5.1	C35E7.3
C47E12.2	D1044.2	C29E4.14	C35E7.4
C47E12.7	D1044.6	C29F5.3	C36E8.4
C48A7.2	D1069.4	C29F5.5	C37A2.7
C48B4.10	D2024.5	C30A5.4	C37C3.11
C48B4.11	D2085.5	C30B5.5	C37H5.2
C48B4.6	DY3.8	C30F12.1	C38H2.3
C48B4.7	E01G4.5	C30F12.7	C39D10.11
C48B4.9	E02H4.6	C30G7.2	C39D10.3
C48B6.2	EEED8.13	C30G7.3	C39E9.10
C48B6.3	EEED8.14	C31H1.5	C39H7.4
C48E7.2	EEED8.15	C31H5.5	C40A11.4
C49C3.10	EEED8.3	C32C4.1	C40A11.6
C49C3.6	EGAP2.1	C32E12.1	C41G7.7
C49C3.7	F02D10.6	C32E8.1	C42D4.1
C49G7.3	F02E8.4	C32E8.4	C42D8.1
C49H3.4	F02H6.1	C33C12.4	C43G2.1
C49H3.9	F02H6.3	C33C12.7	C43H6.1
C50A2.2	F02H6.4	C33D12.2	C44B11.1
C50C3.1	F07A11.2	C33F10.1	C44B7.4
C50F2.3	F07B7.12	C33F10.11	C44B7.7
C50F4.12	F08B12.1	C33F10.12	C44E12.1
C50F4.4	F08F3.6	C33H5.16	C44F1.1
C50F4.8	F08G12.1	C34B2.3	C44H4.1
C50F7.4	F08G12.2	C34B2.4	C44H9.4
C52B11.4	F08G12.3	C34C12.4	C44H9.7
C53D6.4	F08G12.5	C34C12.7	C45B11.2
C53H9.2	F08G2.7	C34C6.4	C45B2.2
C54G4.9	F09A5.4	C34C6.7	C45B2.6
C55A6.9	F09G2.9	C34D4.2	C45G9.13
C55B7.11	F10C2.3	C34D4.3	C45G9.5
C55C3.1	F10D11.2	C34E10.9	C46C11.4
C56A3.5	F10D7.2	C34F11.1	C46C2.7
C56C10.11	F10D7.5	C34F11.3	C46G7.1
C56C10.7	F10E7.11	C34F11.5	C46H11.10
C56C10.9	F10G7.5	C34F6.10	C46H11.7
C56E6.3	F10G8.8	C34G6.3	C47D12.4
CD4.7	F11A10.5	C35A11.2	C47E8.6
D1007.4	F11C1.2	C35A5.4	C48B4.1
D1007.8	F11C1.5	C35A5.7	C48B4.3
D1037.1	F11C3.1	C35C5.10	C48D1.1
D1043.1	F11D5.1	C35D10.11	C49A9.6
D1046.1	F11E6.7	C35D10.2	C49C3.4
D1046.2	F12E12.1	C35D10.3	C49F8.3
D1046.3	F12E12.6	C35D10.8	C49G7.10
D1054.14	F13B12.6	C35E7.10	C49G7.6
D1054.3	F13B9.1	C35E7.8	C49G7.7
D1081.6	F13C5.2	C35E7.9	C49H3.3
D1081.7	F13E6.1	C36F7.5	C50B8.5
D1081.8	F13E6.3	C36H8.1	C50B8.6
D1081.9	F13E6.5	C37H5.13	C50D2.1
D1086.11	F13H10.3	C37H5.3	C50D2.2
D2005.4	F14B8.2	C38C10.3	C50D2.6
D2007.4	F14D7.2	C38C3.3	C50E3.6
D2023.5	F14F11.1	C38D4.7	C50F2.4
D2023.6	F14H3.3	C38D9.2	C50F2.7
D2030.3	F14H3.4	C38H2.2	C50F2.8
D2030.7	F14H3.5	C39F7.5	C50F4.1
D2030.8	F14H3.6	C39H7.1	C50F7.1
D2045.2	F15A4.10	C40A11.8	C50H2.13
D2096.11	F15A4.2	C41A3.2	C52D10.12
D2096.3	F15B10.1	C41C4.3	C52G5.2
D2096.7	F16A11.1	C41G7.6	C53A3.2
E01A2.2	F16B12.4	C42C1.3	C53A5.11
E02D9.1	F16B12.6	C42C1.9	C53A5.9
E02H1.2	F16H11.1	C43E11.5	C53B4.3
E02H1.5	F16H11.3	C43F9.6	C53C11.2
E02H1.6	F17A2.13	C43G2.3	C53D5.2
E04D5.1	F17C11.10	C44B9.2	C54C6.7
F01D4.5	F17E5.2	C44C1.1	C54E10.6
F01F1.11	F17H10.1	C44C10.9	C54E4.4
F01F1.2	F18A1.7	C44H9.6	C54F6.5
F01F1.3	F18A12.7	C45B11.5	C54G4.7
F02E9.7	F18C5.10	C45B11.8	C54G6.2
F02H6.2	F18H3.1	C45G9.15	C54G7.2
F07C6.4	F18H3.4	C45G9.4	C55A6.6
F07E5.5	F19B10.1	C45G9.9	C56C10.4
F07H5.10	F19B10.2	C46A5.1	C56E6.6
F08B4.3	F19B10.5	C46C11.3	C56G2.15
F08B4.5	F19C6.2	C46C2.3	C56G2.3
F08B4.7	F19F10.10	C46C2.6	C56G2.4
F08B6.1	F19H6.4	C46F2.1	C56G2.7
F08G5.1	F21A10.2	C46H11.6	CD4.5
F09D1.1	F21D5.1	C47A10.5	CE7X_3.2
F09F7.3	F21D5.2	C47A4.5	D1005.2
F09G2.8	F21D5.4	C47D12.5	D1005.3
F10B5.2	F21F3.7	C47E12.10	D1005.4
F10C2.4	F21G4.1	C47E12.11	D1009.1
F10C2.5	F21G4.4	C47E12.12	D1022.4
F10E7.5	F21G4.6	C47E8.11	D1054.9
F10E9.3	F22B3.4	C48B6.10	D1086.8
F10E9.4	F22D3.6	C48B6.4	D2005.6
F10E9.5	F22E5.17	C48E7.6	D2007.1
F10E9.7	F22G12.4	C48E7.7	D2024.4
F10G2.4	F23D12.2	C49A1.10	D2030.12
F10G7.9	F25B4.2	C49A1.2	D2030.2
F10G8.7	F25B5.6	C49C8.1	D2045.9
F11A10.2	F25D7.4	C49F8.2	D2092.5
F11A5.9	F25E5.5	C49G7.1	D2092.8
F11E6.3	F25H8.2	C49G7.12	D2096.6
F12A10.8	F25H9.2	C50A2.3	DH11.2
F12F6.1	F26G1.1	C50B6.9	E03H4.8
F12F6.7	F26G5.1	C50C3.2	E04A4.6
F13B12.1	F26H9.5	C50E10.1	E04D5.2
F13D12.5	F27D4.2	C50E10.2	E04F6.4
F13E9.1	F28B3.4	C50F2.5	EEED8.2
F13G3.6	F28C1.3	C50F4.10	EGAP9.3
F13H8.2	F28C10.3	C50F7.3	F01D5.1
F14B4.3	F28F8.5	C50H2.7	F01D5.10
F14D2.11	F28F8.9	C51E3.10	F01D5.6
F14D2.15	F28H1.1	C51E3.6	F01G10.4
F14D2.8	F28H6.4	C51E3.9	F01G10.7
F14H12.7	F28H6.6	C52E12.6	F02E11.3
F16A11.2	F29G9.1	C52E4.5	F02E9.1
F16D3.4	F29G9.2	C52E4.7	F07A11.1
F17A9.2	F29G9.7	C53B4.2	F07C3.9
F17C11.7	F30A10.1	C53C11.5	F07F6.8
F18A1.6	F30B5.4	C53D5.1	F07H5.6
F19F10.9	F31A3.5	C53D6.10	F07H5.7
F20A1.9	F31B9.3	C54G4.2	F08A8.1
F20C5.3	F31C3.4	C54G4.3	F08B4.4
F20D1.4	F31C3.5	C55A6.11	F08C6.5
F20D12.2	F31D5.4	C55A6.4	F08D12.7
F20H11.1	F31D5.5	C55A6.7	F08F3.10
F21A3.5	F31E8.4	C55B7.10	F08F8.10
F21D5.6	F31F6.1	C55B7.3	F08G2.5
F21D9.1	F31F6.2	C55C2.3	F08G5.3
F21F3.4	F31F6.3	C55C3.3	F08H9.3
F21H12.1	F32D1.6	C55C3.4	F08H9.4
F22B3.5	F32D1.7	C55C3.6	F09B12.3
F22E5.9	F33E11.3	C55C3.8	F09B9.4
F23B12.4	F33H1.4	C56A3.8	F09B9.5
F23B12.7	F34D10.2	C56C10.12	F09C6.14
F23C8.9	F35D11.3	C56C10.6	F09E10.5
F23F1.5	F35D2.3	C56G2.5	F09E10.6
F25B3.6	F35F10.12	C56G7.2	F09E10.7
F25B5.2	F35H12.4	C56G7.3	F09E5.14
F25B5.5	F35H12.5	CD4.1	F09F7.1
F25G6.2	F36D1.1	D1014.2	F09F7.5
F25G6.9	F36F12.8	D1022.9	F09F9.2
F25H2.12	F36H2.2	D1044.1	F09G2.1
F25H2.4	F37B4.10	D1046.4	F09G8.5
F25H5.5	F37D6.2	D1065.3	F10C1.8
F25H5.6	F38A5.7	D1081.10	F10D11.6
F25H8.1	F38B7.3	D1081.11	F10D2.8
F26A1.1	F38E11.9	D1081.12	F10E7.9
F26A3.7	F38H4.10	D1081.3	F10E9.1
F26B1.2	F39B1.1	D1081.5	F10F2.4
F26E4.4	F39B2.1	D1086.17	F10G2.1
F26F4.6	F39B2.5	D2024.1	F10G7.10
F26H9.4	F39E9.7	D2045.5	F11A3.1
F27C1.6	F39H12.1	D2045.7	F11E6.1
F28B3.5	F40B5.2	D2062.4	F12E12.11
F28C1.1	F40E10.6	D2062.5	F12F6.8
F28C6.2	F40F4.7	D2062.7	F13A7.11
F29A7.6	F40G12.11	D2063.4	F13B12.2
F29B9.1	F40H3.1	D2089.2	F13B12.3
F29B9.2	F41B4.3	D2092.1	F13B6.3
F29B9.5	F41G3.6	D2092.4	F13C5.5
F29D11.2	F42A8.3	D2096.1	F13D11.1
F29F11.3	F42A9.8	E02A10.3	F13D11.4
F30A10.10	F42F12.3	E02H4.2	F13D12.8
F30A10.3	F42G2.6	E02H9.4	F13D2.1
F30F8.1	F43C1.3	E03H12.5	F13E6.4
F30F8.3	F43C11.9	E04F6.9	F13E9.11
F31C3.2	F43G6.10	F01F1.13	F13G3.12
F31E3.4	F43G6.3	F01G10.5	F13H10.5
F31E3.6	F43G6.7	F02C12.1	F13H10.9
F32A7.4	F44E2.7	F02C9.1	F13H8.1
F32A7.5	F45C12.15	F02E9.3	F14B6.2
F32B6.3	F45G2.2	F02E9.5	F14B6.3
F32D1.9	F46F6.2	F07A11.4	F14B6.4
F32D8.5	F46H5.2	F07A5.2	F14B6.6
F32E10.2	F46H5.4	F07B7.1	F14B8.5
F32E10.5	F47A4.5	F07B7.2	F14B8.6
F32E10.6	F47B10.9	F07E5.8	F14F11.2
F33D11.10	F47B7.2	F07F6.1	F14F9.4
F33D11.9	F47D12.5	F07F6.2	F14F9.5
F33E11.2	F47G3.3	F08A10.1	F15B9.6
F33G12.2	F47G4.2	F08A8.5	F15B9.8
F33G12.3	F47G4.4	F08A8.8	F15D3.8
F33H1.3	F47H4.1	F08F3.8	F15H10.10
F33H2.2	F48A11.4	F08F3.9	F16B4.2
F33H2.3	F48B9.8	F08F8.6	F16B4.4
F35C11.5	F48E3.3	F08H9.2	F16H6.10
F35F11.1	F48F7.6	F09C3.2	F17A9.3
F35G12.11	F49E12.6	F09E8.1	F17C11.11
F35G12.12	F52A8.1	F10C1.3	F17C11.12
F35G12.2	F52B5.2	F10D11.3	F17C11.13
F35H10.5	F52B5.7	F10D11.5	F17C11.2
F35H10.7	F52D10.2	F10D2.10	F17C11.4
F36A2.13	F52D2.7	F10E9.2	F17C11.6
F36D4.5	F52G3.1	F10G2.7	F17C8.3
F36H12.2	F52H2.1	F10G7.12	F17H10.2
F38E1.6	F52H2.5	F10G7.6	F17H10.3
F39F10.3	F52H2.7	F10G8.2	F18A11.5
F39H2.3	F53A2.3	F11A10.6	F18C12.3
F40E3.2	F53A2.9	F11F1.1	F18C5.9
F40F11.3	F53B1.2	F11G11.14	F18E3.11
F40F8.1	F53B3.5	F11G11.4	F18E9.1
F40F8.5	F53C11.5	F12A10.2	F18F11.1
F40G9.14	F53E10.1	F13A2.4	F19B10.4
F41B4.2	F53E4.1	F13A2.6	F19B2.5
F41H10.6	F53F8.3	F13A7.1	F19C6.3
F42A6.5	F53H1.4	F13D11.3	F19C7.1
F42A6.6	F53H2.3	F13D12.9	F19C7.3
F42A9.6	F53H4.6	F13H6.1	F19C7.8
F42G4.5	F54A5.1	F13H8.12	F19F10.5
F42G8.6	F54B11.5	F13H8.8	F19G12.3
F42H10.2	F54C8.4	F13H8.9	F20A1.1
F42H10.7	F54D10.5	F14D7.1	F20C5.4
F43D2.1	F54D10.7	F14E5.3	F20C5.5
F43G9.10	F54D11.2	F14E5.4	F20D6.2
F43G9.12	F54D11.3	F14E5.6	F20D6.8
F43G9.2	F54D5.5	F14H8.8	F21A3.2
F43G9.4	F54F7.6	F15B10.3	F21C10.3
F43G9.5	F54G2.1	F15D3.4	F21C10.7
F43H9.3	F55A11.1	F15D3.9	F21D12.3
F44E2.10	F55A4.1	F15D4.5	F21D5.3
F44E2.8	F55C5.7	F15D4.6	F21D5.9
F44E7.5	F55G1.7	F15E11.14	F21D9.4
F44E7.9	F56A11.5	F15G9.5	F21F3.1
F44G4.1	F56C11.5	F15H10.7	F22B5.6
F44G4.3	F56C9.10	F16C3.4	F22B7.1
F45C12.2	F56D12.6	F16G10.5	F22B7.9
F45D3.3	F56D5.5	F16H6.9	F22D6.12
F45F2.10	F56F10.4	F17A9.4	F22E12.1
F45F2.11	F56F11.4	F17C11.1	F22G12.1
F45G2.3	F57A10.4	F17E9.5	F22H10.2
F45G2.9	F57C7.1	F18A1.1	F22H10.3
F45H11.3	F58D5.9	F18A11.2	F23B2.10
F46B6.4	F58E10.1	F18A11.3	F23C8.13
F46B6.5	F58F9.7	F18A12.2	F23C8.3
F46F11.10	F58G1.1	F18C12.4	F23D12.7
F46F11.7	F58H1.5	F18C5.4	F23F1.7
F48C1.5	F59A6.5	F18E3.7	F23F12.8
F48E3.4	F59B1.8	F19B10.10	F23F12.9
F48E8.2	F59C12.3	F19B6.3	F23H11.7
F48E8.6	F59D12.5	F19C7.5	F23H12.3
F48G7.9	H01M10.1	F19C7.6	F25B3.4
F49C12.9	H02I12.5	F20B6.5	F25B4.8
F49E8.1	H04M03.3	F20B6.6	F25D1.4
F49E8.2	H06H21.11	F20D6.5	F25E2.3
F49E8.7	H11E01.3	F20H11.4	F25E5.1
F52B11.1	H13N06.4	F20H11.5	F25E5.16
F52C12.1	H14A12.3	F21A3.4	F25E5.8
F52C12.2	H19N07.4	F21A9.2	F25H5.2
F52C12.3	H20J04.2	F21C3.6	F26C11.1
F52C6.2	H24K24.3	F21D9.2	F26D10.11
F52C6.3	H25P19.1	F21F3.2	F26D11.6
F52C6.4	H28G03.1	F21F3.3	F26D2.15
F52H3.2	H28G03.2	F21F8.11	F26F12.3
F52H3.4	H37A05.4	F21H7.2	F26F12.4
F53B7.3	K02A6.3	F22B3.8	F26F2.1
F53F4.11	K02B12.5	F22B5.4	F26F2.2
F53F4.12	K02C4.3	F22B8.6	F26G1.5
F53F4.14	K02D3.1	F22B8.7	F27D4.4
F53F8.5	K02E10.1	F22D3.4	F27D9.2
F54C4.4	K02G10.1	F22D6.9	F28B4.4
F54C9.9	K03A11.1	F22E5.1	F28C6.1
F54D12.4	K03E6.7	F22F4.5	F28C6.5
F54D5.14	K03H1.13	F22F7.7	F28C6.8
F54D5.2	K03H1.7	F22H10.1	F28E10.1
F54D5.9	K04B12.2	F23B12.1	F28F5.6
F54D8.6	K04C1.2	F23B2.7	F29C4.6
F54F11.2	K04C1.3	F23C8.1	F29C6.1
F55A11.7	K04C1.5	F23C8.7	F29G6.3
F55A11.8	K04G11.4	F23F1.4	F30A10.2
F55A12.1	K04G2.10	F25C8.4	F30F8.5
F55A12.5	K04G2.6	F25F2.1	F30F8.9
F55A12.8	K04G7.1	F25F8.1	F30H5.3
F55A3.7	K05B2.2	F25H5.7	F31A9.2
F55B12.4	K07A12.2	F26A1.4	F31B12.4
F55C5.4	K07B1.4	F26A3.4	F31C3.6
F55F10.1	K07E3.1	F26A3.5	F31D4.5
F55F8.2	K07E3.2	F26B1.1	F31E3.2
F55F8.3	K07F5.12	F26B1.5	F31F6.8
F55F8.6	K07H8.2	F26E4.12	F32A5.3
F55F8.9	K08A2.4	F26E4.3	F32A5.8
F55G1.5	K08E3.4	F26F12.2	F32A7.8
F55G1.6	K08E3.5	F26F4.2	F32B5.2
F55G1.9	K08E4.2	F26F4.8	F32B5.6
F55H2.7	K08E4.3	F26F4.9	F32B5.7
F56A3.2	K08F9.4	F26H11.4	F32B6.9
F56A8.4	K08H2.3	F26H9.8	F32D1.3
F56A8.5	K09A9.4	F27B3.7	F32D8.1
F56B3.4	K09D9.12	F27C1.1	F32D8.12
F56C9.3	K09E3.5	F27C1.11	F32D8.13
F56C9.6	K09E3.7	F27C1.3	F32D8.3
F56D1.1	K09E9.3	F27C8.5	F32D8.4
F56D1.3	K09H9.2	F27D4.6	F32G8.4
F56D2.2	K10B3.5	F27E5.3	F32H2.6
F56D2.6	K10B4.3	F28A10.3	F33A8.10
F56E10.1	K11D12.5	F28A10.7	F33D11.12
F56G4.4	K11G12.6	F28D1.8	F33D11.5
F56H1.5	K11H12.9	F28D1.9	F33D11.8
F57B10.4	K11H3.3	F28E10.4	F33D4.6
F57B10.8	K11H3.7	F28H1.4	F33G12.5
F57C2.3	K12H6.6	F28H1.5	F33H12.1
F57C2.4	M01B2.10	F28H7.4	F33H2.8
F57C9.3	M01E5.3	F28H7.6	F35A5.5
F57C9.4	M02B7.5	F29B9.11	F35C8.5
F57C9.7	M02D8.3	F29B9.7	F35D2.4
F57F4.4	M02E1.1	F29D10.1	F35E12.9
F58A4.2	M03B6.4	F30A10.12	F35H10.10
F58A4.9	M106.3	F31D4.8	F36A2.2
F58B3.4	M151.2	F31E8.5	F36A2.3
F58B3.6	M151.3	F32A11.3	F36F2.1
F58B3.7	M151.4	F32B4.2	F36G3.1
F58G11.3	M151.7	F32B4.4	F36H1.11
F58G11.6	M163.1	F32B6.10	F36H2.5
F59A2.4	R01H10.7	F32D1.11	F36H5.4
F59A2.5	R02F2.4	F32H2.12	F36H9.5
F59A3.2	R03A10.1	F32H2.7	F36H9.7
F59A3.4	R03G5.6	F33A8.6	F37A4.2
F59E12.1	R03H10.1	F33D11.1	F37B12.3
F59E12.11	R04A9.5	F33D11.2	F37C4.6
H04D03.2	R04D3.2	F33D11.7	F37F2.2
H04D03.3	R04D3.3	F34D10.8	F37H8.3
H05C05.2	R04D3.4	F34D10.9	F38B2.4
H06I04.1	R04E5.8	F35C11.2	F38B6.6
H06I04.3	R04E5.9	F35C11.3	F38E9.1
H14N18.2	R05G9.3	F35C11.4	F39B2.8
H21P03.2	R05H11.1	F35C12.3	F39B3.2
H28O16.2	R06A4.8	F35C5.1	F39C12.1
H35B03.2	R06B9.3	F35E12.10	F39C12.4
H36L18.2	R06B9.5	F35E2.5	F39G3.3
H43I07.1	R06C1.6	F35E2.9	F39H12.2
JC8.4	R06F6.12	F35F11.2	F40A3.1
JC8.5	R07E4.5	F35G12.5	F40A3.4
JC8.7	R08B4.3	F35H10.2	F40A3.6
K01C8.6	R08D7.7	F35H8.4	F40A3.7
K01D12.6	R08E3.3	F36A2.10	F40F11.2
K01G5.3	R08E5.2	F36A2.11	F40F12.4
K01G5.5	R08E5.3	F36A2.12	F40F12.7
K01G5.9	R09A8.1	F36A2.14	F40F8.11
K02B12.2	R09A8.2	F36A4.2	F40F8.3
K02B2.6	R09F10.3	F36D1.6	F40F8.8
K02F3.12	R09F10.8	F36D3.5	F40F9.10
K02F6.7	R102.5	F36D3.8	F40G12.6
K03B4.1	R10D12.8	F36D4.1	F40G9.5
K03B4.2	R10E11.3	F36D4.6	F40G9.6
K03B8.4	R10E12.2	F36H1.3	F40G9.9
K03H4.2	R10E4.11	F36H12.4	F40H6.6
K04B12.3	R11A5.4	F36H2.4	F41C3.2
K04C2.2	R11A5.7	F36H9.4	F41E6.15
K04C2.3	R11H6.2	F37A4.4	F41E6.5
K04F10.3	R12B2.2	F37A4.5	F41E6.9
K05C4.4	R12C12.5	F37A8.1	F41G3.1
K05C4.5	R12C12.6	F37A8.2	F41G3.18
K05C4.7	R12C12.7	F37B12.1	F41G3.21
K06A5.1	R12E2.1	F37C12.18	F41G4.1
K06B9.2	R13A5.7	F37C4.5	F41G4.4
K06B9.4	R144.6	F37C4.8	F41H10.3
K06H7.7	R148.5	F37E3.3	F42A10.5
K07A1.1	R53.2	F37H8.2	F42A10.6
K07B1.7	R53.6	F37H8.5	F42C5.10
K07C5.4	R90.1	F38A1.8	F42C5.4
K07C5.6	T01B7.6	F38A5.11	F42C5.9
K07E8.7	T01C3.3	F38A5.8	F42D1.2
K07F5.14	T01D3.1	F38E1.3	F42F12.4
K07H8.1	T01G5.7	F38H4.4	F42G9.1
K07H8.10	T01H3.4	F38H4.5	F42H10.3
K08D12.3	T02C1.2	F38H4.6	F42H10.5
K08E4.6	T02G5.11	F39G3.2	F43C1.1
K08E7.1	T02G5.3	F39H12.3	F43C1.5
K08F4.1	T02G6.5	F40E12.2	F43C1.7
K08F4.2	T03F6.3	F40E3.5	F43C11.8
K10D2.1	T03G11.6	F40F12.3	F43G6.11
K10D2.5	T04B8.5	F40H6.1	F43G6.8
K11D12.13	T04C4.1	F41C3.5	F44A2.3
K11D2.5	T04D3.1	F41D3.6	F44A6.4
K11H3.4	T04D3.5	F41D3.8	F44D12.9
K12D12.5	T04F8.2	F41E6.1	F44E2.4
K12H4.3	T04F8.3	F41G4.8	F44F1.4
M01A10.1	T04F8.6	F41H10.2	F44F1.6
M01E11.1	T04G9.1	F41H10.5	F44G3.10
M01E11.2	T05A7.1	F42A10.3	F44G4.7
M01E11.3	T05B9.1	F42A9.3	F45C12.9
M01E5.4	T05C1.4	F42A9.7	F45D11.5
M01F1.8	T05E7.3	F42C5.5	F45E4.3
M03C11.2	T05E7.4	F42E8.1	F45E4.7
M03C11.7	T05F1.13	F42G4.2	F46C5.2
M03F8.3	T05F1.2	F42G4.6	F46C8.3
M04B2.2	T05H10.4	F42G4.7	F46F11.1
M04F3.2	T05H4.11	F42G8.7	F46F2.5
M05D6.2	T06D4.1	F42G8.8	F46G10.1
M110.3	T07C12.14	F42G8.9	F46G11.4
M116.2	T07F10.3	F42H11.1	F46H5.5
M116.5	T07F12.2	F43E2.6	F46H6.5
M18.3	T07F8.4	F43G6.4	F47B7.1
M18.6	T08A9.6	F43G9.3	F47B8.2
M18.8	T09A5.4	F43G9.8	F47B8.3
M28.5	T09B4.1	F44A2.5	F47D12.3
M88.2	T09B4.5	F44B9.2	F47D12.6
R02D3.7	T09B9.4	F44B9.9	F47E1.1
R02D3.8	T09F3.5	F44D12.4	F47G4.5
R02F11.4	T10B10.3	F44D12.5	F47G6.2
R02F2.7	T10C6.10	F44D12.6	F48A9.1
R04F11.3	T10C6.6	F44D12.7	F48B9.5
R05D11.4	T10H10.3	F44E7.3	F48C5.1
R05D11.6	T11B7.1	F44F1.3	F48C5.2
R05D11.7	T11F8.2	F44F4.10	F48D6.4
R05D11.9	T12A2.3	F44F4.3	F48E3.6
R05D3.8	T12E12.1	F44G4.5	F48E3.8
R05F9.11	T12G3.2	F45E1.1	F48E8.4
R05F9.9	T12G3.4	F45E4.6	F48F5.6
R05G6.4	T12G3.6	F45H7.6	F48F7.3
R05H10.2	T12G3.7	F46A9.1	F48F7.5
R05H10.3	T13C2.6	F46A9.2	F49E11.2
R06A4.2	T13C5.6	F46C5.6	F49E2.1
R06C7.1	T13H5.6	F46C5.7	F49F1.5
R06C7.2	T14B4.8	F46C8.1	F49F1.6
R06C7.6	T14F9.2	F46F5.16	F49F1.8
R07B7.2	T16G12.8	F46F5.6	F49H12.2
R07E5.1	T17A3.2	F46F5.9	F49H12.3
R07E5.3	T18D3.1	F46H5.7	F49H12.5
R07G3.5	T19A5.1	F47B10.2	F52A8.3
R07G3.7	T19B4.5	F47B3.1	F52B10.3
R08D7.1	T19C3.4	F47B3.2	F52B11.5
R08D7.2	T19H5.4	F47B3.4	F52C9.5
R09B3.2	T20F10.2	F47B3.5	F52D10.6
R09B3.3	T21B4.17	F47B3.6	F52E1.2
R09E12.3	T21C9.13	F47B3.7	F52E1.9
R10D12.12	T22B7.4	F47D12.7	F52G3.5
R10D12.13	T22C1.11	F47G6.3	F53A2.1
R10D12.14	T22C1.4	F47G9.4	F53A3.1
R10H10.7	T22C8.3	F48E3.2	F53A9.1
R119.1	T22F3.2	F48E8.8	F53A9.2
R11D1.1	T22F3.3	F48F5.2	F53A9.3
R11H6.5	T23B12.6	F49C12.15	F53A9.4
R144.10	T23C6.4	F49C5.4	F53A9.6
R148.4	T23F11.4	F49D11.7	F53A9.7
R151.7	T23F2.5	F49E11.7	F53A9.8
R151.8	T24C2.2	F49E2.2	F53A9.9
R17.2	T24C4.2	F49E2.5	F53B1.8
R186.7	T24C4.5	F49E7.2	F53B2.5
R53.7	T24D1.3	F49F1.7	F53B2.8
R74.6	T24D1.5	F52B11.2	F53B3.6
R74.7	T24D5.2	F52F12.5	F53B6.2
R74.8	T24D5.5	F52H2.4	F53B7.5
T01B7.5	T24E12.1	F52H3.6	F53C11.3
T01C3.1	T24E12.10	F53B6.4	F53C3.3
T01C3.9	T24E12.11	F53B6.7	F53C3.4
T02C12.2	T25E12.6	F53F4.18	F53C3.5
T02C12.3	T26C11.4	F53G12.4	F53E10.4
T02E1.2	T26F2.2	F53G12.8	F53F10.1
T02G5.12	T27A8.2	F53H10.2	F53F4.13
T04A6.1	T27F2.2	F54A3.4	F53F8.6
T04A8.15	T27F6.4	F54B3.2	F53H2.1
T04A8.8	T27F6.7	F54C1.8	F53H4.5
T04G9.7	T28F2.2	F54C8.1	F54B11.8
T04H1.5	T28F4.1	F54C8.7	F54B3.1
T05F1.1	VF13D12L.1	F54D1.1	F54B8.4
T05H10.1	W01A11.2	F54E4.3	F54C4.3
T05H4.10	W01A8.5	F54F7.2	F54C8.6
T06D8.7	W01D2.5	F54H12.7	F54C9.11
T06E6.1	W02A11.3	F54H12.8	F54C9.7
T07A9.1	W02D7.5	F54H5.2	F54D1.6
T07A9.8	W02D7.6	F54H5.3	F54D10.3
T07C4.10	W02F12.3	F55C12.1	F54D5.15
T07C4.3	W04A8.6	F55C5.1	F54H5.5
T07D10.3	W04E12.2	F55C5.2	F55A11.6
T07F10.5	W04G3.5	F55D12.6	F55A3.3
T07G12.8	W05F2.3	F55F10.3	F55A3.5
T08A11.2	W05H7.1	F55F8.7	F55A4.2
T08B2.4	W05H9.2	F55G11.1	F55A4.4
T08B2.8	W05H9.4	F55H12.5	F55B11.1
T08D2.4	W06A11.4	F56A11.6	F55B11.4
T08D2.5	W06A7.4	F56B3.6	F55C12.4
T08G11.4	W06B4.1	F56D5.2	F55D12.2
T09A5.8	W06D11.1	F56D6.13	F55F3.3
T09A5.9	W06D11.3	F56F10.2	F55H12.2
T09B4.2	W07E11.1	F56F3.4	F55H12.3
T09F3.4	W08E3.2	F56F4.3	F55H12.4
T10B11.8	W08F4.3	F56F4.4	F56A8.1
T10B5.3	W09G3.6	F56G4.7	F56B3.8
T10C6.5	Y102A11A.8	F56H1.3	F56C4.4
T10C6.7	Y105C5A.14	F56H11.2	F56C9.7
T10E9.1	Y105C5B.19	F57A10.2	F56C9.8
T10E9.2	Y105C5B.20	F57B1.9	F56D2.3
T10F2.2	Y105E8A.8	F57B9.8	F56D2.5
T10F2.4	Y106G6A.2	F57C9.6	F56D5.3
T10H9.3	Y106G6H.14	F57G8.5	F56D5.6
T11F8.1	Y106G6H.6	F58A6.5	F56G4.6
T11G6.5	Y108G3AL.7	F58A6.9	F57A8.1
T11G6.8	Y110A7A.4	F58B4.7	F57B1.5
T12A2.7	Y116A8C.22	F58D2.2	F57B1.6
T12E12.2	Y119C1A.1	F58D5.7	F57B10.9
T12E12.3	Y119C1B.10	F58D5.8	F57B7.1
T12F5.1	Y119C1B.5	F58E6.5	F57B9.1
T12F5.2	Y119D3B.11	F58F12.2	F57B9.3
T12G3.5	Y17G7B.18	F58F12.3	F57F5.3
T13F2.2	Y17G7B.20	F58F12.4	F57G12.1
T13F2.6	Y17G9B.9	F58G1.3	F57G4.1
T13F3.6	Y18D10A.11	F58H1.6	F58A6.1
T13H5.4	Y18H1A.3	F59A2.6	F58A6.2
T13H5.5	Y19D10A.16	F59A3.7	F58B4.3
T13H5.8	Y22D7AL.7	F59A3.8	F58B4.6
T14B4.1	Y24F12A.3	F59A6.2	F58B6.1
T14B4.3	Y32H12A.8	F59A6.4	F58D5.2
T14G10.7	Y34B4A.7	F59A7.7	F58F9.3
T16H12.1	Y34B4A.8	F59A7.9	F58G6.9
T19B10.6	Y37A1B.17	F59B2.5	F58H1.2
T19B10.8	Y37B11A.2	F59C12.4	F58H1.3
T19H12.2	Y37D8A.25	F59C6.2	F58H10.1
T20B12.1	Y37D8A.4	F59C6.3	F58H7.1
T20B12.3	Y37E11AM.2	F59C6.8	F59A1.10
T20D3.8	Y37E11B.3	F59E12.3	F59B1.2
T20F5.6	Y37E3.13	F59H6.2	F59B10.2
T20F5.7	Y38C1AA.12	H01G02.4	F59B10.5
T21B10.4	Y38C1AB.4	H04D03.1	F59B2.8
T21C9.1	Y38C1BA.1	H04J21.1	F59B2.9
T21D12.3	Y39A1A.12	H05L14.1	F59C6.11
T22C1.5	Y39B6A.10	H06H21.9	F59C6.14
T22D1.5	Y39B6A.13	H06I04.5	F59D12.1
T23B12.1	Y39E4B.2	H10E21.1	F59D12.2
T23B12.2	Y39E4B.5	H12D21.5	F59D6.7
T23B12.3	Y39G10AR.17	H12I13.1	F59E11.7
T23B12.4	Y39G10AR.18	H12I13.2	F59F5.7
T23B5.1	Y39G10AR.9	H12I13.6	F59H6.3
T23D8.7	Y39G8B.2	H13N06.7	H01G02.1
T23E1.2	Y41D4A.8	H14E04.1	H01G02.2
T23E7.2	Y42H9B.3	H14E04.3	H01G02.3
T23G11.7	Y43D4A.3	H20J04.1	H03A11.2
T23G4.3	Y43E12A.3	H23L24.2	H03E18.2
T24A6.1	Y43F8B.2	H24G06.1	H05L03.3
T24A6.17	Y43F8C.3	H27M09.5	H06I04.6
T24A6.2	Y43H11AL.2	H32C10.1	H06O01.2
T24B8.2	Y44A6C.1	H32K16.2	H08M01.2
T24D1.2	Y44E3A.6	H34I24.1	H10D18.5
T24D3.2	Y45G12B.3	H38K22.6	H10E21.4
T24F1.2	Y45G5AL.1	H38K22.7	H10E21.5
T24G10.2	Y46E12BL.3	K01A11.3	H18N23.2
T24H10.1	Y46G5A.8	K01A6.5	H25P06.4
T24H10.4	Y46H3C.5	K01C8.2	H27M09.3
T24H7.4	Y46H3C.7	K01D12.15	H34C03.2
T25G3.1	Y47D3A.28	K01D12.7	H34I24.2
T25G3.3	Y47G6A.31	K01H12.4	H35B03.1
T26A5.2	Y47G6A.4	K02A11.2	H41C03.1
T26A5.5	Y47G7B.2	K02B7.3	H41C03.3
T26A5.6	Y47H10A.2	K02D10.2	H42K12.3
T26A8.3	Y48B6A.10	K02D10.3	JC8.12
T26A8.4	Y48E1B.14	K02E7.6	K01A2.3
T26E3.5	Y48G1A.2	K02F3.9	K01A2.4
T26G10.1	Y48G8AL.7	K02F6.1	K01A2.5
T27A3.7	Y49A10A.2	K02F6.3	K01D12.9
T27A8.4	Y49A3A.1	K02F6.9	K02A11.3
T27F6.6	Y49E10.20	K02H8.1	K02B12.9
T28A8.3	Y49F6A.5	K03B8.6	K02C4.5
T28A8.4	Y49F6C.8	K03B8.8	K02D10.5
T28A8.5	Y49G5B.1	K03H1.8	K02D7.2
T28A8.6	Y4C6A.3	K03H1.9	K02E10.6
T28D9.1	Y50D4A.4	K03H6.2	K02E2.6
T28F3.1	Y50D4C.2	K03H9.3	K02F2.5
VB0393L.2	Y50D4C.6	K04C2.7	K02G10.3
VH15N14R.1	Y50D7A.8	K04F10.2	K03A1.2
W01G7.4	Y51A2D.15	K04G2.4	K03B4.4
W02A11.1	Y51F10.11	K04H4.2	K03H1.10
W02B12.10	Y51F10.2	K04H4.5	K03H1.5
W02D9.3	Y51H1A.2	K05C4.11	K03H6.5
W02D9.4	Y51H7C.15	K05C4.8	K04A8.1
W02D9.6	Y51H7C.3	K05F1.1	K04D7.4
W03C9.2	Y52B11A.2	K05F1.6	K04G2.9
W03C9.5	Y52B11A.8	K05F1.8	K04G7.11
W03F8.3	Y53C10A.6	K06A1.2	K05F1.5
W03F9.2	Y53G8B.2	K06A4.6	K06A5.8
W03G9.2	Y54F10AM.11	K06A5.2	K06B4.4
W03G9.3	Y54G11A.7	K06A5.3	K06G5.1
W04A4.5	Y54G2A.29	K06A9.2	K06G5.3
W04A8.1	Y54G9A.5	K06B4.15	K06H7.2
W04A8.5	Y55F3AM.9	K06H7.8	K06H7.3
W04B5.5	Y56A3A.16	K07A1.13	K07A12.7
W04C9.4	Y56A3A.33	K07A1.3	K07B1.6
W04D2.4	Y57A10A.26	K07A1.4	K07C11.10
W04D2.6	Y57G11C.33	K07A1.5	K07C11.8
W04G3.11	Y57G11C.4	K07A12.5	K07C5.3
W05F2.6	Y59A8B.12	K07C11.3	K07D4.9
W05G11.2	Y59A8B.22	K07C11.7	K07E3.7
W05H7.2	Y61A9LA.1	K07E12.2	K07E8.5
W06D11.5	Y62E10A.14	K07F5.17	K07E8.6
W06E11.1	Y62E10A.17	K07F5.6	K07G5.3
W07A8.2	Y62E10A.19	K07G5.4	K07G5.5
W07E6.2	Y65B4BL.1	K07H8.5	K07H8.12
W08E12.1	Y65B4BR.8	K07H8.9	K08B12.1
W09C3.4	Y66D12A.12	K08A2.1	K08B12.3
W09D6.1	Y67D8A.2	K08A2.2	K08B4.2
W09G3.1	Y67D8A.3	K08C7.1	K08B5.2
Y102A5C.2	Y67D8C.9	K08C7.6	K08C7.7
Y102A5C.4	Y69A2AR.1	K08C9.1	K08D12.4
Y102E9.2	Y69A2AR.7	K08C9.2	K08D8.6
Y105C5B.5	Y71F9AR.3	K08D12.6	K08E7.5
Y106G6H.15	Y71G12A.2	K08E4.7	K08E7.6
Y106G6H.16	Y71G12B.23	K08E7.4	K08E7.8
Y110A2AR.1	Y71H2AM.2	K08F11.1	K08F8.7
Y110A7A.11	Y73B6BL.27	K08F4.3	K08H10.9
Y110A7A.15	Y73B6BL.30	K08F8.5	K09A9.6
Y110A7A.8	Y74C9A.4	K08H2.5	K09B3.1
Y111B2A.1	Y75B12B.1	K09B11.5	K09C4.10
Y111B2A.21	Y75B8A.18	K09C6.2	K09D9.1
Y111B2A.3	Y75D11A.2	K09D9.11	K09E4.4
Y113G7B.17	Y75D11A.3	K09E2.3	K09E9.1
Y113G7B.24	Y76A2B.4	K09E4.1	K09F5.6
Y116A8C.13	Y76A2B.6	K09F6.3	K09F6.10
Y119D3B.14	Y77E11A.7	K09F6.4	K09F6.9
Y11D7A.7	Y87G2A.11	K09G1.1	K09H11.1
Y13C8A.1	Y87G2A.18	K09G1.2	K10B3.6
Y14H12B.1	Y92H12BR.3	K09H9.5	K10C2.1
Y14H12B.2	Y9D1A.1	K09H9.7	K10C9.1
Y18D10A.1	ZC13.1	K10B3.1	K10D3.4
Y18D10A.23	ZC155.4	K10C8.1	K10D6.2
Y18H1A.7	ZC204.2	K10C9.7	K10D6.4
Y22D7AR.10	ZC239.6	K10G9.1	K10G4.3
Y23H5A.3	ZC302.2	K10G9.2	K11D12.11
Y23H5B.6	ZC308.4	K10H10.7	K11D12.7
Y24F12A.1	ZC373.1	K11C4.2	K11D12.9
Y32B12B.2	ZC376.4	K11D2.4	K11G12.5
Y32B12B.4	ZC376.7	K11H12.7	K11H12.5
Y32G9A.8	ZC416.2	K11H12.8	K11H12.6
Y32H12A.2	ZC449.3	K11H3.2	K12B6.9
Y37D8A.11	ZC477.5	K12B6.8	K12C11.3
Y37D8A.12	ZC504.3	K12C11.5	K12C11.6
Y37H2A.12	ZC53.1	K12H4.6	K12C11.7
Y38A10A.6	ZC53.6	M01A12.4	K12H6.12
Y39A1A.13	ZC8.6	M01A8.2	K12H6.7
Y39A1A.14	ZK1098.3	M01E5.1	LLC1.2
Y39A3CL.3	ZK1321.2	M01F1.7	M01B12.5
Y39B6A.16	ZK154.4	M01G12.14	M01F1.3
Y39B6A.3	ZK154.5	M01H9.4	M01G12.7
Y39B6A.36	ZK177.1	M02B1.4	M01G5.1
Y39G10AR.10	ZK185.1	M02D8.4	M01G5.3
Y39G10AR.11	ZK355.2	M03A8.3	M01H9.1
Y39G10AR.7	ZK484.3	M03B6.2	M01H9.2
Y39G10AR.8	ZK524.4	M04F3.3	M02B1.2
Y39H10A.4	ZK563.5	M04G7.2	M02D8.1
Y40D12A.1	ZK616.5	M05B5.1	M02G9.2
Y41C4A.2	ZK632.9	M05D6.1	M02H5.8
Y41C4A.9	ZK643.2	M110.7	M03A1.3
Y43F11A.4	ZK673.4	M117.1	M03B6.5
Y45F10A.7	ZK682.2	M117.4	M03D4.4
Y45F10D.7	ZK688.7	M176.4	M03E7.2
Y46G5A.2	ZK829.9	M195.4	M03F4.6
Y46H3C.4	ZK863.4	M28.2	M03F8.1
Y47D3A.22	ZK892.6	M57.1	M03F8.4
Y47D3A.29	ZK973.9	M7.12	M04B2.6
Y47G6A.25	T01C8.1	M70.1	M04B2.7
Y47H9C.8	F55F3.1	M70.3	M04C9.3
Y48A6B.10	F52H2.2	M79.2	M04G7.1
Y48A6B.3	B0336.6	M88.3	M05B5.2
Y48A6B.7	M79.1	R01B10.3	M05B5.3
Y48A6C.1	T08G2.3	R01H2.2	M05B5.6
Y48B6A.1	T25G12.5	R01H2.4	M106.7
Y48G10A.4	T06E8.1	R02D5.7	M176.5
Y48G1A.4	F49H12.6	R02F2.5	M199.2
Y48G1BL.1	R07E3.5	R02F2.6	M28.10
Y48G1C.1	Y65B4BL.5	R03D7.5	M28.8
Y48G1C.8	F57F5.4	R03D7.8	M57.2
Y48G9A.11	C04A11.4	R03E9.2	M60.6
Y49A3A.3	ZK154.7	R04B5.1	M60.7
Y49F6B.2	W03F11.6	R05D3.3	M7.8
Y49F6B.9	F32A6.4	R05D3.6	M70.5
Y4C6B.1	F09E5.13	R05D3.9	M88.7
Y50D4C.3	C25A1.11	R05D7.1	PDB1.1
Y51A2D.8	C06G1.4	R05D7.2	R01H2.8
Y51F10.10	T07D3.7	R05D7.5	R02C2.6
Y51H4A.6	C01F6.5	R05D7.7	R02D3.3
Y51H7C.7	F58G6.1	R05H5.4	R02D5.1
Y52B11A.9	R13G10.2	R06B10.1	R02D5.3
Y53C12A.6	T20B5.1	R06B9.2	R02E12.4
Y53C12B.1	R11A5.1	R06C1.4	R02F11.3
Y53F4B.10	W09G10.4	R07C3.13	R02F2.2
Y53F4B.21	F46F3.4	R07C3.4	R03G5.5
Y53G8AR.8	VF36H2L.1	R07E3.4	R03H10.2
Y54E10A.12	F53H8.1	R07E5.15	R03H10.5
Y54E10A.3	K04G2.8	R07E5.6	R03H10.6
Y54E10A.6	F02E8.3	R07H5.9	R03H10.7
Y54E10BR.2	K08D9.3	R08C7.5	R04B5.5
Y54E2A.8	ZK632.8	R08F11.1	R04B5.6
Y54E5A.5	Y57G11C.13	R09A1.2	R04E5.7
Y54E5B.2	F53H8.2	R09B5.12	R05A10.2
Y54F10BM.12	R74.5	R09E10.1	R05C11.1
Y54G11A.1	F47G3.2	R09E10.2	R05D7.3
Y54G11A.11	F45E6.2	R09E10.3	R05F9.12
Y54G2A.50	D2085.2	R09E10.6	R05G6.10
Y54H5A.2	T08A9.1	R09F10.5	R05G9.2
Y55D9A.2	D2007.5	R102.10	R06A10.4
Y55F3AM.3	F02E8.5	R102.4	R06F6.6
Y56A3A.22	K06A1.5	R106.2	R07B1.5
Y57A10A.1	F41E6.13	R10D12.10	R07B1.9
Y57A10A.2	M03A8.2	R10D12.9	R07B7.10
Y57A10A.3	Y55F3AM.4	R10E11.5	R07E3.1
Y57A10A.31	Y71G12B.12	R10E4.3	R07E3.7
Y57A10A.5	T22H9.2	R10E4.6	R07E5.17
Y57A10A.7	F59H6.1	R10E4.7	R07G3.8
Y57E12AL.1	F25H9.4	R10E9.2	R07H5.10
Y57E12AL.6	Y47D3B.9	R10E9.3	R07H5.3
Y57G11B.5	F09E5.17	R10F2.6	R08C7.12
Y57G11C.51	F54B11.6	R11A8.1	R08E3.1
Y5F2A.4	F23H11.1	R11A8.8	R09A1.3
Y61A9LA.10	F45C12.7	R11E3.1	R09A8.5
Y61A9LA.8	F45C12.12	R11F4.1	R09E10.5
Y62E10A.2	C01G6.8	R11H6.4	R09H10.3
Y63D3A.7	D2024.6	R12B2.3	R09H10.5
Y65A5A.2	Y18D10A.17	R12C12.1	R102.2
Y65B4A.1	T13F2.8	R12C12.8	R102.6
Y65B4BL.3	H02I12.1	R13A5.10	R10D12.6
Y65B4BL.4	C17G10.4	R13A5.11	R10E11.6
Y65B4BR.5	K06A5.7	R13F6.5	R10E4.1
Y69A2AR.24	F16B4.8	R13G10.4	R10E8.1
Y69A2AR.28	ZK637.11	R155.2	R10F2.4
Y69H2.14	C43E11.10	R155.3	R10H1.1
Y69H2.7	C15B12.7	R155.4	R10H10.3
Y71A12B.9	ZK112.7	R160.3	R10H10.4
Y71F9AL.8	F25F2.2	R17.3	R10H10.6
Y71F9B.2	F18H3.5	T01C3.5	R119.5
Y71F9B.6	F39H11.3	T01D1.4	R11A5.3
Y71H2AM.17	R06F6.1	T01G5.8	R11A8.2
Y71H2AM.3	K01D12.12	T01H3.5	R11D1.10
Y71H2AM.6	K01D12.13	T02C12.4	R11G1.6
Y71H2B.2	Y54E10A.15	T02E1.6	R11G1.7
Y73B3A.11	ZK1236.2	T02E1.7	R12B2.8
Y73B6BL.14	Y41D4B.13	T02E1.8	R12C12.10
Y75B8A.14	C48D1.2	T02G5.4	R12C12.9
Y75B8A.16	F56D2.7	T02H6.3	R12E2.7
Y75B8A.31	F08F1.5	T02H6.7	R12E2.8
Y75B8A.7	F31E3.1	T03F6.6	R13A5.9
Y76B12C.6	T26C11.6	T03F6.8	R13H4.2
Y81B9A.2	F22D3.1	T03G6.3	R13H4.5
Y82E9BR.2	T26C11.7	T04A6.3	R144.13
Y87G2A.1	F17A2.5	T04A8.13	R166.2
Y87G2A.7	T26C11.5	T04B2.8	R31.2
Y95B8A.11	F17A9.6	T04B8.1	R57.1
Y95D11A.1	F46F11.2	T04F3.3	T01B6.3
Y97E10AR.3	C14A11.3	T04G9.4	T01B7.9
Y97E10AR.4	C07H6.5	T05A7.6	T01D1.8
ZC168.3	Y38C9A.2	T05B11.4	T01D3.3
ZC317.7	T14G8.1	T05C12.1	T01D3.6
ZC376.6	BE0003N10.2	T05C12.3	T01E8.1
ZC395.10	C04F6.3	T05C12.9	T01G1.2
ZC513.5	F35C8.7	T05C3.6	T01G1.4
ZK1010.2	B0285.9	T05D4.1	T01G9.3
ZK1010.3	C01C10.1	T05D4.5	T01H3.2
ZK1058.5	T27F6.2	T05E11.7	T01H8.2
ZK1067.3	C25B8.4	T05F1.5	T02C5.1
ZK1098.2	C25A1.8	T05F1.8	T02D1.8
ZK1098.5	K10B2.3	T05G5.4	T02E9.5
ZK1127.3	ZK858.3	T06C10.3	T03D3.5
ZK1127.4	T23C6.3	T06D4.4	T03F1.11
ZK1127.5	Y39A1A.15	T06E4.5	T03G6.1
ZK1127.9	C52B9.3	T06G6.8	T04B2.5
ZK1128.4	K08A8.3	T07A5.5	T04B2.7
ZK1248.11	F54C8.2	T07E3.2	T04B8.3
ZK1248.13	C07G2.1	T07F10.1	T04C10.3
ZK1248.15	B0280.5	T08B2.11	T04C12.1
ZK1251.9	R06C7.4	T08B2.12	T04C12.3
ZK1307.9	C10F3.1	T08B6.4	T04D1.2
ZK177.4	K03B4.7	T08G11.2	T04F3.4
ZK20.4	W01A11.5	T09A12.1	T05A12.3
ZK265.6	F11C7.4	T09B4.3	T05A7.11
ZK287.7	AH9.2	T09B4.6	T05A7.7
ZK328.4	F53H4.1	T09B4.7	T05A8.5
ZK328.7	F14H12.4	T09F5.10	T05B11.1
ZK353.1	C24A8.4	T10B10.4	T05E11.8
ZK418.8	Y23H5A.5	T10B11.4	T05E7.5
ZK430.1	ZK856.1	T10B11.5	T05F1.9
ZK430.7	R13A5.1	T10B5.2	T05G5.1
ZK484.4	Y43E12A.1	T10E9.4	T05H10.3
ZK546.14	H31G24.4	T10E9.6	T06D10.1
ZK546.5	T06E6.2	T10H10.2	T06D8.3
ZK550.4	Y38F1A.5	T11B7.2	T06E4.9
ZK593.8	C37A2.4	T11F8.4	T06E6.15
ZK632.5	D1009.2	T11F8.5	T06F4.1
ZK637.2	K06G5.2	T11F9.12	T06G6.4
ZK686.1	H02I12.8	T11G6.2	T07A9.12
ZK686.4	M110.5	T11G6.7	T07D1.2
ZK688.9	F29C4.1	T12A7.2	T07D1.3
ZK795.3	T07A9.6	T13A10.1	T07E3.4
ZK813.1	F33H1.1	T13B5.3	T07F10.6
ZK856.10	Y55D5A.5	T13F2.12	T07F12.1
ZK856.11	F25E2.5	T13F2.9	T07F8.2
ZK856.12	C05D2.1	T13F3.8	T08A11.1
ZK858.1	W01G7.1	T13H5.1	T08A9.11
ZK858.5	K07E3.3	T14D7.1	T08B1.1
ZK858.7	Y55F3AM.12	T14E8.1	T08B6.2
F52D10.1	F52G2.1	T14G10.8	T08D2.1
ZK809.2	C14F5.1	T15B12.1	T08E11.8
F08F3.2	Y48E1B.1	T15B12.2	T09A12.2
F32A5.1	F44G4.8	T15B7.14	T09A5.11
T20H4.4	F09B12.2	T15H9.4	T09E8.1
B0334.8	F29G9.6	T15H9.5	T10B10.8
Y62E10A.5	C04F6.5	T16A9.3	T10B11.7
K07C11.2	T25G12.7	T16A9.4	T10B5.4
F23B2.6	C18D1.1	T16A9.5	T10D4.3
M18.7	F07A11.6	T16G1.9	T10E9.3
F36A4.7	W09C5.5	T16G12.4	T10E9.5
K10B2.5	T25E12.4	T16G12.7	T10G3.1
Y43F8C.14	Y73B6BL.43	T16H12.2	T11G6.4
C08B6.9	C25F6.2	T17H7.7	T12A2.15
F15H10.3	K02G10.8	T18D3.7	T12A2.8
K06H7.6	T24H10.3	T18D3.9	T12A7.6
T05H10.2	C55B6.2	T19C3.5	T12D8.5
K11D2.2	R11E3.7	T19D12.5	T12D8.9
F35G12.10	T23G7.1	T19D12.6	T13C2.2
C03D6.5	T14B4.7	T20B6.1	T13C2.3
C45G3.1	Y47D3B.10	T20B6.2	T13C2.7
C44B9.4	F22B7.10	T20F5.5	T14B1.1
T06E4.3	F47A4.2	T20H4.2	T14B4.5
F28F8.6	R160.1	T20H9.6	T14G10.5
F57B10.11	R13G10.1	T21B6.2	T14G8.3
F59H6.9	F26E4.10	T21B6.3	T14G8.4
C08C3.2	C34F11.9	T21C12.4	T16G1.5
F52C6.11	C27A2.6	T21C12.8	T16G12.6
F59H6.8	K07A1.2	T21D12.9	T16H12.11
B0047.3	C02C6.1	T21E12.5	T19A5.3
F14D2.1	C16C2.2	T21E3.2	T19A6.1
F14D2.4	H30A04.1	T21G5.1	T19B10.2
F59H6.10	R05D11.8	T21G5.4	T19C3.3
W02A11.5	T10G3.5	T22A3.6	T19C4.1
W02A11.8	Y102A5C.18	T22B11.1	T19D12.1
Y75B12B.4	Y48C3A.17	T22B3.2	T19D12.4
K08E4.5	B0244.8	T22B3.3	T19D2.3
F52C6.8	R01H2.3	T22C1.8	T19E7.6
C50C3.8	F44F4.2	T22C1.9	T19F4.1
C07D10.2	T21E3.1	T22D1.12	T20B3.1
F59H6.11	R12E2.10	T22D1.8	T20D3.2
F52C6.10	F28C1.2	T22E7.1	T20D4.19
F54C9.6	F55A8.1	T22H9.3	T20F10.5
C50B8.2	C23H3.1	T23B12.11	T20F5.4
C36A4.8	F22E12.4	T23B3.5	T20G5.8
T07E3.5	C27C12.2	T23B7.2	T21B4.3
K04C2.4	ZK1248.3	T23C6.5	T21C9.4
F45E12.2	Y26E6A.1	T23E1.1	T21C9.6
F57C2.1	Y41C4A.10	T23F11.2	T21D12.7
B0047.2	F42A6.9	T23F2.3	T21H8.1
F15D4.1	F52C12.5	T23F4.5	T22B11.3
R06C7.8	R11E3.6	T23F6.3	T22B11.4
cTel55X.1	C44H4.7	T23G11.1	T22E5.6
W03H9.4	T04C10.2	T23G11.10	T22E7.2
C18E3.6	R09A1.1	T23G5.6	T22F7.1
K07C5.8	K09E9.2	T24B1.1	T22H2.6
Y57G11C.25	T01D1.2	T24C12.1	T23B12.8
C16C10.6	F35H8.5	T24H10.5	T23B3.2
T06D8.6	C43E11.8	T25B9.1	T23F2.2
T05C12.7	K07A3.1	T25B9.4	T23F2.4
K01C8.10	C33E10.2	T26C11.3	T23F4.2
F01F1.8	B0391.5	T26C12.2	T23F6.5
T10B5.5	C36C9.3	T26H10.2	T23G5.3
B0511.9	F35E12.3	T27A3.4	T24A6.20
C06A1.1	F45C12.8	T27A3.5	T24A6.7
C41C4.8	T07D3.1	T27C10.8	T24B8.4
K04G2.3	Y45F10C.3	T27E7.1	T24C12.3
T05G5.3	C17B7.11	T27E9.2	T24C4.3
T27E9.3	C18B12.5	T27F6.1	T24C4.4
C35D10.9	F49B2.2	T28A11.2	T24C4.8
F26F4.1	Y20C6A.2	T28B4.1	T24E12.5
C03D6.3	C32B5.10	T28B8.3	T24F1.3
F52B5.5	R07C3.8	T28C6.5	T24F1.4
M01E11.5	R07C3.2	T28C6.7	T24F1.7
T09B4.10	C17F4.5	T28C6.8	T24H7.2
Y110A7A.13	C46E10.4	T28D6.5	T25B9.10
T25G3.2	T19C3.8	T28D6.7	T25B9.11
K10D2.3	F13B9.8	T28D9.3	T25B9.12
C02F5.4	C29F7.4	T28D9.9	T25B9.3
F36A2.1	C29F7.5	T28F12.1	T25B9.8
K08F11.3	C26E6.2	T28F2.1	T25D10.1
ZK1127.7	Y11D7A.13	T28F4.3	T25D10.2
F55F8.4	T07D1.4	T28H11.7	T25D10.4
T05A6.2	F25H9.5	VC5.2	T25E4.1
C09G4.3	H05G16.1	VY10G11R.1	T25F10.3
R07E5.8	H09G03.2	W01B11.1	T25F10.6
Y38E10A.5	ZK899.8	W01B6.2	T25G12.11
ZK39.2	C04A11.3	W01B6.4	T26A8.2
E04F6.11	C17F4.6	W01B6.5	T26C12.3
C06G3.10	W07B3.2	W01B6.6	T26E3.7
Y51H7C.6	T12A7.1	W01B6.8	T26G10.5
F08H9.1	K02A11.1	W01C9.4	T26H5.10
K02D7.3	M163.4	W01D2.3	T26H5.8
F56B3.1	M04B2.3	W01F3.1	T26H5.9
Y77E11A.15	F14F3.2	W02A2.8	T27A1.2
T05A1.2	T02E1.3	W02B12.12	T27A1.5
F26F12.1	ZK637.13	W02H5.8	T27C4.2
T15B7.3	T23G11.3	W03B1.5	T27D12.1
F57B1.4	C55B7.1	W03B1.9	T27E4.1
F11H8.3	F55D10.3	W03C9.1	T27E7.6
C09G5.5	C45B2.5	W03C9.6	T27F2.4
F38A3.1	F26D10.10	W03C9.8	T28B4.4
ZK652.9	C28D4.3	W03D8.10	T28B8.1
B0414.5	F02A9.6	W03D8.3	T28C6.3
F28C6.3	F48E3.1	W03D8.5	T28D6.4
F56A8.6	Y75B8A.17	W03D8.9	T28D6.6
F43G9.9	T23G11.2	W03F11.4	T28F2.4
F09G2.4	C26C6.2	W03F8.2	T28F2.7
R13F6.10	F44C4.4	W03F9.11	T28F3.4
F59A2.3	K04D7.5	W03F9.3	T28F3.8
Y47G6A.8	T07A9.7	W03G1.2	T28F4.4
C14A4.4	F13D12.7	W03G11.4	T28H10.1
Y59A8A.1	T09F3.3	W03G9.5	T28H10.3
B0025.2	Y87G2A.8	W03G9.9	VM106R.1
Y55F3AM.15	F19C6.1	W04A4.2	VZC374L.1
B0547.1	W02B3.2	W04A4.4	W01A8.7
F20D12.1	F37B1.5	W04C9.5	W01C8.5
F45E12.3	F11G11.2	W04C9.6	W02A2.9
ZK353.7	Y46G5A.31	W04E12.4	W02B8.1
K08E3.6	C30H6.6	W04H10.1	W02C12.2
T01B7.4	Y50E8A.16	W05B2.4	W02D9.10
C34D4.12	F13D11.2	W05B5.1	W02F12.2
T27D1.1	C53A5.3	W05E10.1	W02H5.5
F20D12.4	C10E2.3	W05F2.2	W03A5.4
C47E8.5	K02E10.2	W05F2.4	W04A4.6
C25A1.10	F38A6.3	W05F2.7	W04A8.4
F56D1.7	ZK370.3	W06D4.2	W04B5.2
C55B7.8	F17E9.10	W06D4.3	W04B5.3
K12H4.8	T23D8.5	W06F12.3	W04E12.9
Y39A3CR.4	M05B5.5	W07G4.3	W04G3.1
T07D4.4	T24B8.6	W07G9.2	W04H10.2
F01F1.7	Y39A3CR.6	W08E3.4	W05G11.6
Y65B4BL.2	T20B12.8	W08F4.7	W05H12.1
C36B1.7	R13H4.4	W09B6.5	W05H9.3
C01G8.3	K05C4.6	W09B7.1	W06A11.2
Y39A1A.11	W02B9.1	W09B7.2	W06A7.2
C04G2.6	W09D6.6	W09C3.1	W06B11.1
C26B2.1	K08H2.6	W09C3.2	W06B4.2
F38A5.13	B0285.5	W09C3.7	W06F12.2
T03F6.2	Y53C10A.12	W09C3.8	W06H8.6
T04A8.9	F38E11.2	W09D10.5	W08A12.2
T23B12.7	F08B4.6	W09D12.1	W08A12.3
C04A2.7	C34F6.4	W09D6.4	W08A12.4
C54G4.6	Y34B4A.3	W09H1.4	W08E12.2
F33H2.1	R08C7.3	W10C8.5	W08E12.6
F54C1.2	F29D10.4	W10G11.17	W08E12.8
C52B11.3	F46C3.3	Y102A5C.36	W08G11.1
F01F1.5	Y39G10AR.13	Y102E9.5	W08G11.3
C25G4.5	R04A9.4	Y105C5B.11	W09C5.7
Y39A1B.3	C05D9.5	Y105E8A.13	W09D10.4
D2005.5	T02C5.3	Y105E8A.27	W09G10.3
F53A2.5	R107.4	Y106G6A.4	W09G3.2
T12E12.4	F26B1.3	Y106G6D.3	W09G3.8
T12D8.2	R06A4.4	Y106G6D.4	W09H1.1
F38B7.5	C36B1.12	Y106G6G.1	W10C4.1
Y106G6H.12	C33H5.11	Y106G6G.2	W10C8.4
VW02B12L.3	Y51H1A.4	Y106G6G.4	W10D9.1
T19E10.1	W04D2.3	Y106G6H.13	W10G11.19
Y55D9A.1	F08G12.10	Y111B2A.27	Y102A11A.3
C04A2.3	Y47G6A.2	Y113G7A.12	Y102A11A.5
F26A3.3	F22F4.2	Y116A8A.4	Y102A11A.6
Y94H6A.11	K02B2.4	Y116A8A.6	Y102A11A.9
B0511.10	Y116A8C.36	Y116A8C.23	Y105C5A.1
Y74C10AR.1	Y48B6A.11	Y116A8C.24	Y105C5A.15
T16G1.11	K03D10.1	Y116A8C.33	Y105C5A.9
C47B2.5	C10H11.10	Y116A8C.38	Y105C5B.9
F22D6.6	C30F8.4	Y116A8C.8	Y105E8A.19
Y105E8A.17	C10C6.1	Y116F11B.13	Y105E8A.23
T16G12.5	C33H5.4	Y116F11B.14	Y105E8B.11
Y110A7A.16	M01E11.6	Y116F11B.7	Y105E8B.3
C26B2.6	C41G7.2	Y116F11B.8	Y105E8B.7
F10B5.6	C06G3.2	Y116F11B.9	Y105E8B.9
F54C8.3	F11A6.1	Y119C1B.1	Y106G6H.9
Y80D3A.2	K08B4.1	Y119C1B.11	Y108G3AL.3
T04A8.14	W03F8.5	Y119C1B.3	Y10G11A.1
M01D7.6	F58A3.1	Y17G7B.19	Y110A2AL.4
ZK809.4	W01G7.5	Y18D10A.21	Y111B2A.12
T07A9.5	K08F8.6	Y18D10A.3	Y113G7B.14
W09B6.3	F26D11.11	Y18D10A.8	Y116A8B.1
Y38F2AR.1	K08E7.3	Y18H1A.1	Y116A8C.3
H38K22.1	C32D5.9	Y18H1A.10	Y116A8C.44
F22B5.1	B0336.8	Y18H1A.11	Y119C1B.9
R09B3.1	C29A12.3	Y18H1A.15	Y11D7A.14
Y48A6B.5	C09H6.2	Y1A5A.1	Y12A6A.2
F59C6.4	Y71F9B.5	Y22D7AR.12	Y15E3A.4
B0564.1	F17E5.1	Y22D7AR.2	Y15E3A.5
F31D4.1	F56H9.5	Y23H5A.4	Y17D7B.3
F37C12.13	F36H1.4	Y23H5B.2	Y17D7B.4
F10E7.8	ZK418.4	Y24D9B.1	Y17D7C.1
H12I13.4	C07H6.7	Y25C1A.13	Y17G7B.11
F21H12.5	C12C8.3	Y26D4A.12	Y17G7B.14
F59A1.7	F47F6.1	Y26E6A.3	Y17G7B.8
Y113G7B.7	Y73B6A.5	Y27F2A.6	Y17G9B.1
M162.8	T09A5.10	Y32F6A.6	Y18D10A.2
F59A1.8	K07A1.12	Y32G9A.11	Y18H1A.9
C47B2.1	JC8.6	Y32G9A.3	Y20F4.2
F48C1.2	T12F5.4	Y34F4.3	Y22D7AL.15
F59A1.9	B0454.1	Y37A1A.3	Y22D7AL.16
T06C12.4	C05B10.1	Y37D8A.5	Y22D7AL.9
W05F2.5	F37H8.1	Y37D8A.8	Y23H5B.8
Y102A5C.1	W06F12.1	Y37E11AL.2	Y32F6A.4
F28F8.8	C03B1.12	Y37E11AL.4	Y32F6B.1
W08F4.9	C39E6.1	Y37E11AL.6	Y32G9A.6
Y48E1B.11	T08D10.2	Y37E11AR.3	Y34B4A.6
C16A11.6	F40F8.9	Y37E11AR.4	Y34B4A.9
Y54G2A.22	R160.7	Y37E11B.10	Y34D9A.2
M02B7.1	Y37A1B.2	Y37E11B.9	Y37A1B.7
Y41E3.9	Y71G12B.20	Y37E3.19	Y37B11A.3
C01F6.4	K01A6.2	Y37F4.1	Y37D8A.16
T01C3.7	C44C8.6	Y37F4.5	Y37D8A.17
F32D1.1	T04C10.1	Y38E10A.14	Y37D8A.3
F23H12.9	F49E11.1	Y38F1A.1	Y37E11AM.3
C12D8.18	Y48G1A.6	Y38F1A.6	Y37E11B.1
F31D4.3	W09C2.3	Y38F2AR.10	Y37E11B.2
Y11D7A.12	Y17G7B.5	Y38H6C.14	Y38E10A.22
F39H2.1	C25D7.6	Y38H6C.15	Y38E10A.25
W02D3.10	Y39G10AR.14	Y38H8A.2	Y38E10A.26
F56A3.1	R10E4.4	Y38H8A.3	Y38F1A.2
C26E6.5	ZK632.1	Y38H8A.4	Y38F2AR.12
Y113G7B.4	F32D1.10	Y39A1A.18	Y38H6C.16
F59E12.13	T23C6.1	Y39A1A.2	Y38H6C.20
ZK177.6	Y57E12AL.5	Y39A1A.24	Y38H6C.8
T05H4.14	Y62F5A.1	Y39A1A.8	Y38H8A.1
ZC404.9	F46A9.6	Y39A1C.1	Y39A1A.16
K01C8.5	K02B9.1	Y39A3CR.8	Y39A1A.9
Y37A1B.15	K02B9.2	Y39B6A.18	Y39A3A.3
F57F4.3	T01G9.5	Y39B6A.25	Y39A3A.4
T07F8.3	F57B10.12	Y39B6A.30	Y39A3CL.7
T21G5.3	K08A8.1	Y39B6A.9	Y39A3CR.5
B0414.6	ZK858.4	Y39E4A.1	Y39B6A.11
T12F5.3	F54F7.5	Y39E4B.11	Y39B6A.33
C03E10.4	W03C9.7	Y39E4B.13	Y39B6A.5
C34E10.2	F53G12.5	Y39F10C.1	Y39C12A.1
T19C4.6	W02A2.7	Y39G10AR.15	Y39E4B.6
Y95B8A.5	AH6.5	Y39G10AR.16	Y39G8B.9
F33H1.2	DY3.6	Y39G8B.1	Y39H10A.6
F22B7.13	Y34D9B.1	Y39G8C.2	Y40B10A.2
F32D1.4	R06B9.6	Y39H10B.2	Y40D12A.2
ZC395.6	C35C5.4	Y40B10A.9	Y40H7A.4
K06H7.4	PAR2.4	Y40H4A.2	Y41C4A.13
T03F1.5	R07E4.4	Y41C4A.1	Y41D4A.3
T10G3.6	F11A10.3	Y41C4A.18	Y41D4B.11
C46A5.9	R13.4	Y41C4A.7	Y41D4B.15
ZK1055.1	F42G10.2	Y41E3.8	Y41D4B.16
F58A4.3	T28A8.7	Y42A5A.1	Y41D4B.18
T03F1.9	C09E8.3	Y42H9AR.2	Y41D4B.26
C08B11.2	ZK1058.1	Y43C5A.4	Y41E3.6
R06C1.1	T20B12.6	Y43C5B.2	Y41G9A.3
F41H10.6	T06H11.4	Y43C5B.3	Y42A5A.4
C26D10.2	T07H6.2	Y43D4A.1	Y42G9A.1
C18G1.5	F38E1.7	Y43F8A.5	Y42G9A.3
B0414.3	F52F12.3	Y43F8C.5	Y43B11AR.1
F59A7.4	T23D8.1	Y43F8C.9	Y43B11AR.3
F28B3.7	R02E12.2	Y44A6B.3	Y43E12A.2
R12B2.4	F21G4.2	Y44A6D.3	Y43F4A.1
ZK1127.11	F14F4.3	Y44A6D.5	Y43F4B.7
T09E8.2	Y43F8C.12	Y44E3A.1	Y43F4B.9
ZK381.1	T24A11.1	Y45F10B.13	Y43F8B.1
T04A11.6	H28G03.6	Y45F10B.8	Y43F8B.9
T07G12.12	F53A2.8	Y45F10B.9	Y43F8C.13
Y49E10.6	Y39H10A.3	Y45F10C.1	Y43F8C.4
W05B10.1	T19B10.11	Y45F10C.6	Y43F8C.6
T28F3.3	F40G9.11	Y45F10D.16	Y44A6D.2
Y17G7A.1	K03D10.3	Y45F3A.1	Y45F10B.15
C32F10.5	R107.1	Y45G5AM.3	Y45F3A.4
F45E4.9	C50B6.2	Y46G5A.14	Y45F3A.8
C18E3.8	ZK470.5	Y46G5A.29	Y45G5AM.6
F32A11.2	ZC168.1	Y46G5A.34	Y46E12A.3
F42A6.7	T08D10.1	Y46H3D.1	Y46G5A.10
F26D10.3	W10D9.4	Y47A7.2	Y46G5A.13
T05F1.6	F26F4.7	Y47D3A.13	Y46G5A.20
F41H10.10	W04H10.3	Y47D3A.31	Y46G5A.4
F57C9.5	B0280.8	Y47D3A.5	Y46G5A.7
H26D21.1	C28D4.1	Y47D9A.3	Y47D3A.1
C56C10.8	T06C12.6	Y47D9A.4	Y47D3A.14
B0348.6	R04B5.4	Y47D9A.5	Y47D3B.4
T05G5.10	Y41D4B.9	Y47G6A.13	Y47D3B.6
C27A2.3	F44C8.8	Y47G6A.18	Y47D7A.13
T19B10.7	C28D4.9	Y47G6A.26	Y47D7A.14
C53D5.6	C13C4.2	Y47G6A.3	Y47G6A.17
W06H3.1	C33G8.7	Y47G6A.5	Y47G6A.9
F15B9.4	C02B4.2	Y47G6A.7	Y47H10A.4
F07A5.1	F38H12.3	Y47H9C.15	Y47H9C.1
Y47G6A.1	F41B5.9	Y48A6B.9	Y48B6A.6
ZK792.3	F48G7.11	Y48B6A.12	Y48C3A.5
F37A4.8	C32F10.6	Y48B6A.5	Y48E1B.2
R13F6.1	F43C1.4	Y48G1BM.6	Y48E1B.7
F26H11.1	K06A1.4	Y48G1BM.8	Y48G1C.12
C34B2.2	T27B7.6	Y48G1C.5	Y48G8AL.5
T17E9.1	Y80D3A.4	Y48G8AL.13	Y48G8AR.2
M7.2	ZK697.2	Y49E10.10	Y48G9A.9
C29E4.2	K08H2.8	Y49F6B.8	Y49A3A.4
Y43F4B.6	F58G6.5	Y4C6A.4	Y49E10.18
K11D9.1	F32B6.1	Y50C1A.2	Y49E10.23
C02F5.1	T03G6.2	Y50D4B.3	Y50D4A.3
K06A5.4	C45E5.6	Y50D7A.4	Y51A2D.14
T10B5.6	K10C3.6	Y50E8A.10	Y51A2D.21
F10C2.2	F57A10.5	Y50E8A.12	Y51F10.3
ZK742.5	Y17D7A.3	Y50E8A.2	Y51F10.7
Y55B1AR.1	T09A12.4	Y50E8A.5	Y51H4A.1
F42H11.2	Y51A2D.17	Y51B9A.7	Y51H4A.25
F26F12.7	K11E4.5	Y51H4A.13	Y51H4A.4
Y54E5B.3	F36A4.14	Y51H4A.22	Y52B11A.4
F33A8.1	T06C12.7	Y51H7C.8	Y53C12B.2
F11A10.1	F57C7.2	Y51H7C.9	Y53C12C.1
K10B2.1	K09A9.1	Y52D5A.1	Y53F4B.1
F18A1.2	R03A10.4	Y52D5A.2	Y53F4B.12
C32F10.2	R03D7.7	Y53C10A.15	Y53F4B.27
F44B9.6	ZK1127.1	Y53C10A.5	Y53G8AM.4
R06C7.7	B0240.4	Y53C12A.7	Y53G8AM.5
Y71G12B.9	F59A2.1	Y53C12A.8	Y53G8AR.7
ZK637.7	R04A9.2	Y53F4A.2	Y54E10A.16
F18A1.3	T03D8.1	Y53F4B.11	Y54E10A.17
F18A1.4	ZK1086.1	Y53F4B.19	Y54E10BL.3
C48E7.3	T20B5.3	Y53G8AL.4	Y54E2A.1
K09H9.6	C09G9.6	Y53G8AM.6	Y54E5A.1
R13A5.12	ZC513.6	Y53G8AR.1	Y54E5A.6
R10H10.1	B0334.11	Y53G8B.3	Y54F10AM.6
F33G12.4	F59E10.1	Y53G8B.4	Y54F10AM.8
F52F12.4	C45B11.1	Y53H1C.3	Y54F10AR.1
F32A5.7	C38D4.6	Y54E2A.10	Y54F10BM.13
F28F8.3	F54E7.3	Y54E2A.5	Y54G11A.9
Y71G12B.14	T26E3.3	Y54E2A.7	Y54G2A.11
ZK593.7	T22A3.5	Y54E2A.9	Y54G2A.27
T22A3.3	ZK1058.2	Y54E5A.2	Y54G2A.45
Y37A1B.1	F43G6.9	Y54F10BM.3	Y54H5A.4
Y48C3A.7	F27D9.5	Y54G2A.13	Y55B1AL.1
Y110A7A.17	F52E4.1	Y54G2A.15	Y55B1AR.2
W10C6.1	C10F3.5	Y54G2A.20	Y55B1BL.1
F10C5.1	W03D2.4	Y54G2A.24	Y55B1BR.3
C16C4.10	ZK688.6	Y54G2A.26	Y55D5A.1
C09H6.3	E01F3.1	Y54G2A.36	Y55D5A.4
C50F4.11	H42K12.1	Y54G2A.4	Y55F3AM.10
Y69A2AR.30	F46C3.1	Y54G2A.49	Y55F3BR.11
T09A5.6	T28H11.4	Y54G2A.5	Y55F3BR.2
C55B7.9	Y49E10.14	Y55B1AR.4	Y55F3C.3
ZK970.3	W03G1.6	Y55B1BR.2	Y56A3A.2
F32H2.2	EEED8.9	Y55F3AM.6	Y56A3A.6
ZK546.13	F57F5.5	Y55F3C.9	Y56A3A.7
Y54E10BL.6	F09E5.1	Y57A10B.1	Y57A10A.23
C38D4.3	Y104H12BR.1	Y57A10B.7	Y57A10A.28
Y2H9A.1	B0218.3	Y57G11C.23	Y57A10C.6
C09G4.5	C54G10.3	Y57G11C.6	Y57G11B.1
R05D3.11	F22B7.6	Y57G7A.3	Y57G11B.6
T05C12.6	W10C8.2	Y57G7A.5	Y57G11C.22
Y47G6A.24	F52E1.1	Y57G7A.6	Y57G11C.31
M106.1	VF11C1L.1	Y57G7A.8	Y57G11C.32
C04H5.6	C24A8.3	Y58A7A.1	Y57G11C.37
EEED8.5	C37A2.2	Y59E9AL.5	Y57G11C.38
Y53C12A.4	F48F7.4	Y59E9AL.6	Y57G7A.1
T27C10.3	T13H2.4	Y59E9AR.8	Y57G7A.10
ZC155.3	Y39A3CR.7	Y59H11AL.1	Y58A7A.3
ZC302.1	D2096.2	Y59H11AM.1	Y58A7A.4
Y37D8A.9	F09E5.15	Y59H11AM.4	Y58A7A.5
Y41C4A.14	W02D9.1	Y59H11AR.2	Y58G8A.4
H26D21.2	R53.6	Y60A3A.24	Y59A8B.10
T02G5.6	ZC506.3	Y62E10A.3	Y59E9AL.4
F09E8.3	M03F8.2	Y62F5A.10	Y60A3A.14
Y47G6A.11	ZK675.1	Y65B4A.7	Y60A3A.7
K04D7.2	F21H12.4	Y65B4A.8	Y60A3A.8
W08D2.7	Y110A2AL.8	Y65B4A.9	Y61A9LA.9
PAR2.1	F42G9.9	Y66A7A.4	Y62E10A.11
F37D6.1	C09D8.1	Y66C5A.1	Y62F5A.9
C43E11.2	C32E8.8	Y66D12A.11	Y64G10A.6
C14C11.6	Y73B6BL.38	Y66D12A.14	Y64G10A.7
K04F10.6	Y45F10A.2	Y66D12A.3	Y64H9A.2
VC5.4	F54C9.8	Y67A10A.3	Y65A5A.1
C09H10.6	F18A11.1	Y67A10A.8	Y65B4A.2
F37E3.1	B0273.2	Y67A6A.1	Y65B4A.4
F26A3.2	K10D2.2	Y69A2AR.14	Y65B4A.6
W01B6.9	F59A3.9	Y69A2AR.19	Y65B4BL.6
T26A5.3	Y39A3CL.6	Y69A2AR.23	Y66A7A.5
C28A5.3	T14G10.2	Y69A2AR.31	Y66D12A.13
F23F1.1	T05G11.1	Y69A2AR.32	Y66D12A.5
C17E7.5	K09A9.2	Y69A2AR.8	Y66H1A.5
Y69H2.8	Y92C3B.3	Y69E1A.2	Y67A10A.7
H12C20.3	Y45F3A.2	Y69E1A.3	Y67A10A.9
B0213.3	Y47D3A.25	Y69E1A.5	Y67D2.7
F30H5.2	F26H9.6	Y69E1A.8	Y67D8B.4
F20G4.3	T25G12.4	Y69F12A.1	Y67H2A.10
W07E6.1	W03C9.3	Y6B3B.1	Y69A2AR.16
F32E10.1	C27B7.8	Y71A12B.10	Y6B3B.9
W01B11.3	C25D7.7	Y71A12B.17	Y6E2A.4
K09B11.2	F54E4.1	Y71A12C.2	Y71A12B.11
Y53C12B.3	F20D1.6	Y71F9AL.2	Y71D11A.3
K07F5.13	B0393.2	Y71F9AL.4	Y71F9AL.6
ZK328.5	ZK593.4	Y71F9B.13	Y71F9AR.2
F53F10.5	T01E8.2	Y71F9B.15	Y71G10AL.1
T23H2.1	W06A7.3	Y71G12A.4	Y71G10AR.4
C03D6.4	C39E9.13	Y71G12B.17	Y71G12B.16
C29E4.4	R05D3.4	Y71G12B.22	Y71G12B.25
Y56A3A.17	F28B4.2	Y71G12B.27	Y71G12B.4
Y43F4B.4	C38C10.5	Y71G12B.3	Y71G12B.8
R06F6.5	F45B8.2	Y71G12B.30	Y71H2AM.10
T01G9.4	F45B8.1	Y71G12B.33	Y71H2AM.15
R07G3.3	F56B6.2	Y71H2AL.1	Y71H2AM.16
K12D12.2	F52D2.2	Y71H2AL.2	Y71H2B.4
F07A11.3	Y59E1A.2	Y71H2AM.1	Y72A10A.1
F56A3.3	ZC53.7	Y71H2AM.13	Y73B3A.1
T19B4.2	F46H6.1	Y71H2B.1	Y73B3A.18
Y41D4B.19	W07A12.7	Y73B3A.13	Y73B3A.7
D1007.7	Y69A2AR.2	Y73B6A.1	Y73B3A.9
C03G5.11	C53B7.1	Y73B6A.2	Y73B6BL.19
K01C8.9	Y42H9B.2	Y73B6BL.22	Y73B6BL.21
R10E4.5	T05G5.7	Y73B6BL.31	Y73B6BL.25
C33H5.14	C27H6.4	Y73C8B.1	Y73B6BL.33
F53A2.4	T11F8.3	Y73C8B.2	Y73B6BL.36
R11A5.2	F49E7.1	Y73C8B.3	Y73B6BL.44
C15H11.6	F18C12.2	Y73E7A.3	Y73F4A.2
C16C2.3	C04F12.9	Y73F4A.1	Y73F8A.26
C25D7.8	ZK863.7	Y75B7B.1	Y75B12B.11
C17E4.5	R119.7	Y75B7B.2	Y75B7AL.2
C15H11.7	T23G5.1	Y75B8A.10	Y75B7AR.1
D1054.2	C03C10.3	Y75B8A.23	Y75B8A.13
C36B1.4	F54D12.6	Y76A2B.2	Y75B8A.29
F25H2.9	Y116A8C.16	Y76B12C.4	Y75B8A.39
CD4.6	C01B7.6	Y77E11A.12	Y75B8A.4
C26C6.1	C34E11.1	Y80D3A.8	Y75B8A.5
K08D12.1	T01H8.1	Y81G3A.1	Y76B12C.1
C47B2.4	ZC328.4	Y82E9BR.1	Y76B12C.8
Y38A8.2	F41H10.11	Y87G2A.20	Y77E11A.14
T20F5.2	R11G1.4	Y92H12A.2	Y77E11A.2
C02F5.9	ZK377.2	Y95B8A.4	Y7A5A.1
F39H11.5	Y47D3B.7	Y97E10AR.8	Y7A9D.1
Y47G6A.6	M01D7.2	ZC116.3	Y80D3A.9
F10B5.5	D2013.8	ZC15.1	Y81G3A.3
C07G1.3	Y47D9A.2	ZC155.2	Y82E9BL.18
F56G4.2	F52E10.1	ZC168.6	Y82E9BR.13
H20J04.5	C35C5.1	ZC190.7	Y82E9BR.17
B0035.4	F57C7.3	ZC190.8	Y82E9BR.21
F21C3.5	F19B10.9	ZC196.3	Y82E9BR.22
Y18D10A.20	C33H5.9	ZC21.8	Y82E9BR.23
ZK381.4	C28G1.3	ZC247.2	Y82E9BR.6
B0523.3	F52E4.7	ZC250.5	Y87G2A.17
C18G1.4	W05H7.3	ZC262.4	Y87G2A.2
Y18H1A.6	F35H12.3	ZC262.5	Y92H12A.5
T23G7.5	F35G12.3	ZC317.6	Y94H6A.10
C14B9.4	C32A3.1	ZC328.2	Y94H6A.3
Y71F9B.7	C14F5.5	ZC328.3	Y95B8A.12
F55G1.8	K09F5.5	ZC376.8	Y97E10AL.2
F45E4.2	R06F6.4	ZC395.4	Y97E10AR.1
H12C20.2	R11E3.4	ZC410.5	Y9C12A.1
F53A3.2	T12D8.1	ZC412.10	Y9C2UA.1
W03A3.2	W01C8.3	ZC412.5	Y9C9A.8
D2092.2	Y24D9A.2	ZC412.9	Y9D1A.2
Y49E10.3	Y43F4B.3	ZC434.8	ZC123.1
C15F1.4	C49F5.2	ZC477.10	ZC123.3
C13G3.3	F44A6.2	ZC477.2	ZC123.4
Y110A7A.18	T04F8.1	ZC477.7	ZC13.2
F52C9.8	C14F5.4	ZC513.3	ZC168.2
K11D12.2	F54A5.3	ZC518.1	ZC190.4
R119.4	F43D9.4	ZC581.2	ZC196.6
T06E4.11	T19E7.2	ZC581.7	ZC204.12
W02A2.3	Y47D7A.8	ZC581.9	ZC247.1
Y43H11AL.3	F54D10.1	ZK1010.5	ZC250.2
ZC15.8	C42D4.6	ZK1010.6	ZC328.1
F58A4.4	K08H2.1	ZK1053.2	ZC373.5
C34E10.5	Y47D7A.1	ZK1067.2	ZC395.5
R166.4	M02A10.3	ZK1098.6	ZC412.1
C07E3.2	C32D5.2	ZK1098.9	ZC412.3
F26H9.1	T05A10.1	ZK1127.10	ZC443.1
F49D11.1	K11G12.4	ZK1127.2	ZC443.3
W07E6.4	Y54E5B.1	ZK1128.3	ZC449.1
C36B1.5	F53H8.4	ZK121.2	ZC449.2
C50C3.6	T10H9.4	ZK1225.4	ZC449.5
F29B9.4	C05D9.1	ZK1225.5	ZC487.1
T27E9.5	W06D4.5	ZK1248.20	ZC581.3
F59G1.5	F41F3.2	ZK1248.5	ZC84.3
C30G12.7	C50E10.4	ZK1248.7	ZK1010.4
W06H3.2	ZK1236.3	ZK1290.5	ZK1010.8
T01B7.3	C04E7.2	ZK1290.7	ZK1053.3
F43D9.2	C24B5.2	ZK1307.1	ZK1053.4
ZK20.3	T13H2.5	ZK1307.3	ZK1055.6
C27B7.4	K10B3.10	ZK1307.4	ZK1055.7
T04H1.4	ZC404.8	ZK131.11	ZK1058.3
Y43C5A.6	C07A12.5	ZK177.2	ZK1073.1
W06D4.6	Y40B1B.6	ZK228.3	ZK1098.1
K01G5.4	F29F11.1	ZK353.3	ZK1193.2
C26D10.1	T24D1.1	ZK353.4	ZK1236.9
R12C12.2	Y50D4C.4	ZK354.2	ZK1290.14
K07A1.11	C52E12.3	ZK354.3	ZK1307.8
T23F6.4	ZK1307.5	ZK354.8	ZK1320.3
ZK287.5	F49B2.5	ZK354.9	ZK1320.5
R10A10.2	R10E11.7	ZK39.10	ZK1320.7
E03A3.2	F55A4.5	ZK418.2	ZK177.9
F21C3.4	Y71H9A.3	ZK484.5	ZK180.5
T20G5.11	ZK287.2	ZK484.6	ZK185.3
W02A2.6	DY3.7	ZK484.7	ZK20.1
C54G10.2	F39B2.4	ZK507.1	ZK228.4
F31E3.3	F53C11.8	ZK507.3	ZK265.7
K09H11.3	F53C11.7	ZK512.10	ZK287.1
T07D4.3	F59F5.6	ZK512.8	ZK287.4
C06A5.9	C26G2.1	ZK546.3	ZK337.1
K01G5.1	C54H2.1	ZK546.4	ZK337.2
ZK938.7	R03E1.1	ZK546.7	ZK353.10
K08D10.4	F48D6.1	ZK550.1	ZK355.3
K08D10.3	K10D3.3	ZK550.5	ZK370.6
R07E5.14	C11G6.1	ZK593.9	ZK370.8
K02F3.11	F54F7.1	ZK596.2	ZK418.5
F18A1.5	F08F1.7	ZK616.8	ZK418.7
M04F3.1	R09A8.3	ZK622.1	ZK418.9
W01G7.3	T18H9.7	ZK637.1	ZK512.1
F23B2.13	C54H2.3	ZK637.12	ZK54.1
C36B1.3	F53E2.1	ZK637.15	ZK54.3
C06A1.5	C33H5.19	ZK652.8	ZK550.6
Y54E10BR.6	C38D4.5	ZK666.2	ZK593.1
F26F4.11	F26F4.4	ZK666.8	ZK596.3
C42D4.8	F43B10.2	ZK669.2	ZK632.11
T22F3.4	Y73F8A.34	ZK673.6	ZK643.1
F52B5.6	C02F12.4	ZK678.3	ZK643.5
C09H10.2	F33C8.1	ZK686.5	ZK673.11
T22D1.9	Y47G6A.28	ZK688.10	ZK675.3
B0205.3	F26G5.9	ZK688.12	ZK682.7
K07D4.3	T24H7.5	ZK688.2	ZK686.2
ZK20.5	F35H12.2	ZK688.4	ZK688.1
C23G10.4	R11B5.1	ZK742.3	ZK688.5
C30C11.2	F45E6.3	ZK783.3	ZK742.4
F10G7.8	E01G4.1	ZK783.5	ZK757.2
F49C12.8	Y48E1C.3	ZK783.6	ZK792.5
R12E2.3	C33F10.2	ZK792.1	ZK792.7
T06D8.8	Y66A7A.8	ZK795.2	ZK813.5
T05F1.3	ZK829.5	ZK795.4	ZK822.1
C52E4.4	T07C4.6	ZK809.1	ZK836.2
F29G9.5	K01C8.3	ZK822.2	ZK836.3
F23F12.6	F13B10.1	ZK822.5	ZK849.2
F23F1.8	F25H2.1	ZK84.5	ZK856.14
F56H1.4	F09E10.8	ZK849.5	ZK863.8
F10B5.7	C07F11.1	ZK849.6	ZK896.5
C25A1.9	C15F1.3	ZK858.2	ZK899.1
F16D3.2	F53B3.1	ZK858.8	ZK899.7
W02B12.3	C24F3.1	ZK892.3	ZK909.3
Y111B2A.18	F57B10.7	ZK892.5	ZK930.1
EEED8.7	DY3.4	ZK909.6	ZK930.3
T28D9.2	ZK546.15	ZK930.4	ZK938.2
C33H5.12	T14G10.6	ZK930.5	Y47D3A.15
D2089.1	C17G1.8	ZK930.6	C55C2.5
Y57A10A.19	F08F1.8	ZK930.7	Y39D8C.1
F25H2.13	ZK1128.6	ZK938.1	R03E9.3
C27H6.2	F58B3.9	ZK945.6	F47B10.7
T22D1.10	F42E11.2	ZK945.7	F58G6.4
F10E9.8	Y71G12A.3	ZK945.8	C17C3.12
Y45F10D.9	Y94H6A.6	ZK970.1	W09B12.1
W06E11.4	K07B1.3	ZK970.8	Y48B6A.8
F10G7.4	C10H11.4	ZK973.4	ZK40.1
F18E2.3	Y37E11AR.5	ZK973.8	C42D8.5
ZK6.3	F35H8.6	F27C8.1	ZK455.1
C39E9.2	F32F2.1	F07C3.7	R01E6.4
C34B2.7	T07C4.1	T13A10.10	F25G6.4
M116.4	C47E8.7	C24F3.5	F25G6.3
F55B12.3	M142.1	F12B6.1	ZC504.2
Y47G6A.12	T02C5.5	Y53C10A.9	F11A3.1
T26A5.7	JC8.10	F57F10.1	F47G6.2
C26E6.9	W02D3.9	F56C9.5	F17C8.1
Y32F6A.1	T19B4.7	T10E9.9	C44F1.5
C07A9.7	Y60A3A.1	C37A2.3	F39C12.2
C15H11.5	T28F12.2	K05F1.3	H15N14.1
C41G7.4	Y37D8A.13	Y44E3A.2	Y50D7A.7
C32D5.5	C04F6.4	F08G5.2	C02H7.3
C47E8.8	F54B11.3	F28F8.1	F32A7.6
C33H5.15	D2021.1	C46F4.2	Y87G2A.4
F02E9.4	M03A1.1	T01C2.1	F41G3.12
T27F2.1	Y37E11AR.6	F08C6.1	C25A11.4
F48E8.7	B0410.2	C41G7.5	F28H6.1
C06A8.4	K07E3.8	F42G9.5	C54D1.4
F46A9.4	F20B6.2	F01F1.6	Y69F12A.2
C52D10.9	C26H9A.1	F55D10.1	T08B1.3
C52D10.7	F08G12.4	F48C1.1	F45H10.1
Y47D3A.26	C10H11.1	C05E11.4	R08B4.2
F35G12.8	R06F6.2	ZK973.6	F58H1.1
F46B6.3	C05D11.2	K01H12.2	Y105E8A.9
W02D3.8	T08G5.5	F55A12.7	C42D8.8
Y73B6A.4	F28B12.3	F32A5.5	F08C6.6
Y37E11AM.1	R08C7.10	ZK525.2	Y57A10A.35
C41G7.1	D2013.2	M02F4.8	C01G6.1
Y49F6B.4	D2030.9	K07A1.16	F40F9.9
W02F12.6	C10C6.5	F45E4.1	ZK1320.6
T13F2.7	T20F10.1	F57H12.1	C01C7.1
Y116A8C.42	Y48G1A.5	Y37E3.5	F19H8.3
W08E3.1	Y71F9B.3	T04C10.4	T28F4.2
T28D9.10	F54F2.2	W04D2.1	B0252.2
C52E4.3	F35H8.3	B0207.12	R12H7.2
ZK652.1	W05H7.4	F40B1.1	F21F8.3
Y49E10.15	F59B2.6	B0047.1	K08F8.2
Y71F9B.4	EGAP1.3	F29C12.5	ZK792.8
ZK430.3	Y105E8A.26	M7.3	F26D10.9
Y34D9A.4	F54F2.5	C54C6.2	C38C6.2
F32H2.3	F52F12.6	F23B12.8	K04G2.5
F56A3.4	R08E3.4	C53B4.7	C06H2.1
ZC404.3	Y48C3A.4	B0464.4	Y71F9AR.1
T05E11.4	Y6G8.3	Y73E7A.7	C05D2.4
C54G6.5	C53D5.4	T25D10.5	Y49F6C.4
D1014.8	C08B11.1	F38B7.1	T07H3.6
F54C4.2		W08F4.8	F52H3.3
D2096.4		F08B4.2	Y49F6C.3
R10E11.4		F18F11.3	Y105E8A.5
T06G6.1		ZC64.3	F20D12.3
W07G1.2		W05E10.3	R01H10.6
F26B1.6		C17H12.9	T25F10.5
F12F6.5		F59C6.7	C48B6.8
C32B5.2		F18C12.1	T13C5.5
T28A11.9		F48A11.1	K02A4.1
Y75B12B.7		B0285.8	Y46G5A.24
F40H7.4		F22F7.5	F53C3.12
C07E3.1		C05H8.1	Y39B6A.12
F30A10.5		C36B1.1	C43G2.2
C34D4.8		Y25C1A.1	F40G9.4
F28C6.6		K01C8.8	ZC204.11
F57B1.2		F10F2.7	F39E9.2
F26D2.2		F10F2.6	T07F10.4
C24G6.1		F10F2.8	C23H4.1
F39H2.4		F10F2.5	D1022.8
T23D8.9		T04A8.3	C13C12.1
Y54E2A.3		F38A1.14	C18E9.1
K03B4.3		R08C7.6	B0034.3
F43D9.5		Y70C5C.5	B0432.5
F30F8.8		Y60A3A.2	C56A3.7
W09B6.2		Y46C8AL.1	K01A2.11
Y111B2A.16		F47C12.4	R10E11.1
JC8.13		T27D12.2	C54D2.5
E02H1.3		ZC190.1	T28F2.5
F10G7.1		Y47H10A.1	Y73F8A.6
F44A2.1		Y39A3CL.5	R10F2.1
F18C5.3		Y77E11A.10	K03E5.3
T07A9.13		ZK970.2	T23F11.3
W06E11.2		T21H3.3	F35E8.11
Y57A10A.9		F14H8.6	C54D10.1
F49D11.9		F29B9.9	K01D12.11
B0464.8		F53G12.7	ZK512.3
F58G11.5		M01A12.1	C02F4.1
C25A1.3		C50D2.4	T07C4.8
F26E4.8		F14F7.1	K02F3.6
ZK1248.10		R01H10.3	K07C5.5
Y54E2A.12		C40H1.1	W03A3.1
F58A4.8		C30B5.3	R13A5.5
T20B12.2		K08B4.6	C13G5.1
ZK829.6		D1069.2	F20D12.6
Y39B6A.35		K07C11.5	C27A12.5
Y43C5A.5		Y38A10A.5	F29F11.5
T02H6.2		Y48E1B.13	F46F3.1
C16A3.8		Y47H9C.6	C28A5.4
F32H2.4		H06O01.3	ZK993.1
K08E3.3		T13H5.2	K02B12.1
M01E5.5		Y53H1B.1	ZK265.4
K12D12.1		Y37B11A.1	F43G9.11
F53G2.6		Y55F3C.7	ZK909.4
W03F9.5		F59H6.7	F56D1.6
F58A3.5		ZC168.4	F27E11.3
C43E11.4		ZC116.2	T27A10.7
W02A11.4		ZK520.5	T06C12.10
C35B1.1		F42A9.5	T20G5.1
R01H2.6		B0213.11	C27A7.4
F25H2.8		F11A1.3	F56H1.1
F58A4.10		F25B5.1	F22E12.2
C08B11.7		T21B6.1	C52B9.1
H06I04.4		Y47H9C.2	T27A10.3
F23C8.4		F55A12.4	Y39A3B.5
F48A11.5		T02E1.5	Y47D3A.4
ZK353.8		E04F6.7	ZK563.4
H06H21.6		K07E12.1	C01C10.4
T24C4.1		M18.2	F09G8.8
F19B6.2		Y106G6G.3	E03H4.10
C05C10.6		Y54E10BL.4	F32E10.3
C07A9.6		T23F1.7	F26D10.12
T10F2.3		C33G3.1	M02F4.7
Y38A8.3		C04C3.5	B0365.6
K02F2.4		C48A7.1	C35D10.14
W09C5.2		C40H1.4	W04E12.8
Y56A3A.29		F56H11.3	B0218.8
C55B7.5		Y47D3A.30	T03F1.10
C13B4.2		F38A6.2	F35C5.5
F52E1.10		W09C2.1	F35C5.9
F56D12.5		K04H4.1	F56D6.2
C37C3.3		F32D8.6	Y46C8AL.8
C56C10.1		K09A9.3	Y54G2A.6
Y53C12A.1		K02E11.1	F57C9.2
F18C5.2		F20D12.5	Y52B11A.5
C07G1.4		F26H11.5	C07H6.6
K07G5.2		F02A9.2	C01G8.2
Y76B12C.2		F02A9.3	T04A8.16
F57B10.6		W02A2.2	F56D1.4
ZK742.1		B0511.3	K07A9.2
C49H3.10		C05B5.6	F55C10.1
M03D4.1		F17A9.1	C34E10.7
K02B12.8		F44E7.6	R01H10.8
T07G12.6		F57G4.8	R03C1.3
T07G12.11		T05H4.2	Y71F9AM.4
Y44E3B.1		Y47H9C.10	C34H4.4
R06C7.9		Y49E10.17	C34D4.15
T24C4.7		ZK1290.9	T11B7.3
T10B11.3		F07E5.6	F56D5.1
ZC395.8		C33C12.5	F08G5.4
F22B5.7		Y63D3A.10	C39E9.3
		F23F1.3	T06E4.4
		F43G9.6	F14H12.1
		T05E8.1	F36A4.10
		C46H11.11	C09G5.4
		Y18D10A.25	Y18H1A.13
		B0286.5	Y54E10BL.2
		T06C10.4	F26B1.4
		F07D3.2	K08C9.4
		H24K24.5	ZK1248.2
		Y54E10A.4	M110.1
		Y113G7B.5	M195.1
		C03C11.2	F33A8.9
		C06H2.4	F17C8.2
		K01B6.1	F28H1.2
		T04B2.2	C25B8.3
		D1037.3	Y76B12C.7
		K08F8.3	K11D12.4
		T05A7.10	M04G12.2
		T05A7.5	Y41C4A.4
		C10F3.6	B0024.14
		T24C12.2	K04H4.6
		ZK180.1	Y32F6B.3
		C24H11.7	Y54G11A.5
		T19A5.2	Y108G3AL.1
		Y62E10A.16	K08E7.7
		F08B1.2	C02C2.3
		C14B9.6	F22B5.3
		R01H2.5	T04F8.4
		Y75B7AL.1	W04C9.3
		K03H1.1	T21B10.6
		Y105C5B.28	K06A1.3
		F07C3.4	Y53C12B.6
		C12D12.2	F54A5.2
		K08F4.4	Y55D5A.6
		T22E5.2	F41A4.1
		M01F1.1	F20D1.8
		C55B7.2	W01A8.3
		C41G11.4	M28.1
		F25H8.3	K10B4.6
		M04C7.1	Y87G2A.6
		R10H10.5	F42G9.2
		C38C10.4	T10B9.8
		W05E7.1	T10B9.3
		F07C4.7	T10B9.10
		R06A10.2	F02C12.5
		Y18D10A.5	F08F3.7
		C36B1.10	C36A4.2
		W09C3.6	C12D5.7
		Y45G12C.2	F41B5.3
		F37B1.4	R08F11.3
		Y53F4B.29	C50H11.15
		Y53F4B.30	C03G6.15
		R03D7.6	C49G7.8
		C05C12.3	C06B3.3
		T06E4.1	F01D5.9
		ZK829.2	B0412.1
		T14F9.3	F23B2.4
		C14C11.3	B0240.3
		B0035.8	F01G10.8
		F55G1.3	R13H8.1
		H02I12.6	M03A1.7
		E03A3.4	K12C11.4
		C14B9.1	C26C6.5
		F43E2.8	Y38H6C.5
		T10H10.1	W06B11.3
		F53A2.6	Y38H6C.3
		Y57A10A.30	F58G1.4
		C04F12.3	C54D10.7
		F08G2.6	F59E12.10
		C16E9.4	C25F6.4
		T18H9.5	F11D5.3
		R09F10.4	ZC477.9
		ZK792.2	C47C12.6
		C09B8.1	F58G6.6
		F33D4.2	F26A3.6
		T22C1.7	F42A9.1
		T16H12.6	K06A1.6
		W02G9.2	C47E12.8
		ZK909.2	R05D8.8
		F22D6.1	C10F3.2
		W08D2.8	C45B11.3
		K07F5.4	R11D1.11
		T06C10.6	Y60A3A.10
		B0523.1	F09E10.3
		T13H10.1	C17G10.8
		W02B12.7	K10H10.3
		F56E3.3	Y32H12A.3
		F40F4.4	F08B4.1
		F52H3.7	C18A11.7
		ZK892.1	F33E2.2
		ZK1248.16	F13G11.1
		F01G12.5	K08B12.2
		F52H3.1	F22B7.5
		C29E4.8	W03A5.7
		H19M22.2	Y47H9C.5
		Y58G8A.1	ZK6.10
		F46F3.2	C24B9.9
		F25H5.1	K09G1.4
		ZC247.3	ZK507.4
		H32C10.2	C27C12.7
		E01A2.3	H27M09.4
		C31H1.6	F54D8.1
		F48E8.1	T22B3.1
		T21E3.3	Y59A8B.1
		C18D11.2	EGAP7.1
		Y53C12B.5	F27C1.8
		F59H6.4	F46C8.6
		ZK250.5	F15B10.2
		ZK250.6	C54A12.4
		F43C9.4	F45H10.4
		F35G12.1	K02D7.4
		C04G6.1	W09G12.1
		T06A4.2	Y41D4B.10
		F57C12.5	F15B9.9
		F20B6.3	F25H8.5
		K07F5.2	ZK1193.5
		ZK354.4	F54C1.5
		K05F1.2	C27H5.7
		F26G1.7	ZK520.3
		R05F9.13	M04C9.5
		R05F9.8	F46F6.4
		C04G2.4	Y105E8A.7
		K08F4.8	Y48B6A.4
		C33F10.9	ZK512.6
		ZK354.5	B0365.3
		R13H9.4	F43H9.1
		K05F1.7	R06F6.9
		ZK354.1	F01G10.2
		ZK1251.6	C26D10.5
		K08E5.3	C43F9.8
		W10G6.3	F56A11.3
		F46G10.6	F23B12.9
		K08E5.2	F58A3.2
		C34D4.9	F38G1.2
		F02E8.6	F16B3.1
		F09G8.4	F01D4.4
		W02G9.1	C04G2.7
		Y39G10AR.3	B0348.4
		ZC581.1	W03H1.2
		ZK20.6	D2024.3
		T05A8.4	F41H10.7
		T07C4.9	C33D3.1
		C37H5.1	C39B10.6
		F54G8.4	T20G5.5
		C33G8.11	Y111B2A.11
		Y45G5AM.1	K08C7.3
		E02H9.8	F22A3.1
		T01G6.2	F32A7.3
		F33E11.1	C33D9.1
		E02H1.7	Y105E8B.2
		C01H6.5	H35N03.1
		Y38E10A.18	F12F3.1
		F56H1.2	W08D2.4
		H01A20.1	W06D12.3
		Y67A6A.2	VZK822L.1
		Y39B6A.17	ZK783.1
		Y18D10A.6	T12B5.3
		F59C6.6	C02H6.2
		E03D2.2	Y113G7B.3
		C15H9.1	C18D4.2
		F55B12.5	T27B7.7
		C29A12.4	C08E3.10
		H12D21.13	C08E3.6
		ZC412.6	C08E3.8
		W06A7.5	C08E3.9
		ZK484.8	C31C9.3
		T27C10.7	F47H4.8
		K07F5.5	F47H4.9
		C24D10.7	Y82E9BL.15
		T23B7.1	T06E6.3
		F11G11.8	Y66A7A.1
		C24D10.8	T08E11.7
		Y43C5A.1	Y119D3A.3
		F26A1.10	ZC47.14
		F08F8.1	F42G2.8
		W03B1.8	F52D2.8
		K09E10.1	C39B5.9
		K09E10.2	ZC47.13
		C43F9.10	T12B5.2
		C48E7.8	T12B5.8
		F14H8.1	cTel54X.1
		T09A12.3	T28A11.21
		ZK455.8	T12B5.11
		K11C4.4	Y82E9BL.13
		M02B7.3	Y102A5C.19
		C44B12.2	C08F11.5
		W03G9.6	Y63D3A.2
		K08F8.4	Y63D3A.3
		R153.1	F53C3.2
		C14B1.1	F29A7.2
		F09C3.1	M01D1.10
		C34G6.4	F55C9.13
		T16D1.2	Y40B1B.3
		F35G2.4	ZK909.5
		T20B3.7	H24O09.2
		F07C6.1	R08C7.9
		Y75B12B.6	R08C7.13
		T01E8.3	Y17G9B.7
		K04B12.1	E04A4.1
		C29E6.3	F49B2.1
		C09G1.1	E04A4.2
		F32A5.6	R17.1
		F56C11.2	C33F10.13
		K07A3.2	F12E12.8
		K07C10.1	R07C3.11
		ZK994.3	K09F6.8
		C44C11.1	R07C3.6
		F17C8.4	R07C3.5
		C05B5.7	Y46B2A.1
		F16H9.1	Y54F10AM.2
		F08F3.3	F41E7.5
		T14A8.1	C05C8.3
		Y22F5A.3	C50F2.6
		B0491.3	B0511.1
		ZK1290.6	C25A1.2
		C16D9.2	F40H3.4
		F07D10.1	K03C7.2
		C26F1.9	B0523.5
		C09H10.1	K02G10.4
		Y41D4B.5	C05E11.8
		C18H9.7	F33D4.3
		C49F5.1	Y37D8A.15
		T10H9.2	ZK525.1
		Y51H7C.2	Y48D7A.2
		F11A6.2	M79.4
		K08D10.8	W07E11.3
		F46A8.10	C25H3.5
		Y50E8A.9	F31F6.4
		K08D10.7	C36H8.3
		Y44A6D.4	K08C7.2
		F14B6.1	K08C7.5
		R07H5.4	F53F4.5
		C29F5.2	F59G1.7
		C09B7.1	T04C9.6
		AH6.2	C50H2.1
		Y6E2A.9	ZK1248.14
		C47D12.3	R07B7.11
		H22K11.4	F47D12.1
		T27F7.2	M05D6.7
		Y51A2D.19	ZK896.8
		R31.1	T04D3.4
		D1037.2	C54E4.3
		C30A5.5	C49H3.1
		Y32F6A.2	F58A4.11
		F55H12.1	F56A11.1
		Y46G5A.30	F19H6.2
		ZK1010.9	F49E2.4
		ZK829.10	F56C4.3
		C06A8.5	C06E4.7
		AC3.10	R11H6.3
		T02E1.1	T06A1.4
		F47G6.4	W01C9.5
		R10H10.2	C06H2.5
		F25H8.7	C23H5.2
		Y52B11A.1	C26C6.7
		ZK524.1	C27H5.8
		K01A11.4	ZC308.1
		B0240.2	H04M03.4
		Y66D12A.20	R07B1.12
		F53G12.6	B0280.12
		C17D12.6	C06A8.9
		C28C12.7	F41B4.4
		F42D1.3	C07G1.8
		T22G5.5	Y75B8A.9
		Y38A10A.1	Y66A7A.6
		M02B1.1	F54D7.3
		Y27F2A.3	H22D07.1
		K07F5.9	T01H8.5
		T27A3.3	Y71H2B.7
		C55C2.2	F38E1.5
		ZK1225.6	E02C12.5
		F32B6.7	F56H9.3
		F32B6.5	F52A8.2
		F47B8.11	K02A4.2
		F54C1.9	C24G6.7
		F54C9.2	C26F1.5
		C06B3.4	F28A12.2
		F27D9.8	Y75B8A.20
		W01B11.2	Y65B4BR.6
		W04G3.6	F42C5.7
		K02E10.8	T02E9.2
		C30H6.2	K06A4.3
		Y76A2A.1	F56C9.1
		F27D4.5	F37B1.8
		C53A5.4	ZK697.6
		ZK430.2	F37B1.1
		B0511.4	K08F4.11
		W09D10.2	ZK546.11
		F44F4.11	Y53F4B.35
		C31E10.8	Y1H11.2
		C31H2.1	R07B1.4
		C38H2.1	F35E8.8
		H13N06.6	Y53F4B.33
		Y47D3A.10	K08F4.7
		C14F5.3	F56B3.10
		M01A10.2	D1053.1
		F19H8.1	F11G11.3
		W05E10.4	D2024.7
		C23H3.7	K04D7.3
		ZC581.6	ZC504.5
		F59G1.2	R09B5.6
		D2092.7	W04C9.1
		W06H8.8	ZK484.2
		F46B3.3	F53B2.6
[truncated: 689 more rows]
