# Supplementary material for: Nanos promotes epigenetic reprograming of the germline by down-regulation of the THAP transcription factor LIN-15B
Source: eLife. 2017 Nov 7;6:e30201. doi: 10.7554/eLife.30201 (PMC5734877; doi:10.7554/eLife.30201)
Supplement: Supplementary file 2. — Excel sheet 1. List of 221 genes that acquired open chromatin in nos-1(gv5)nos-2(RNAi) L1 PGCs. Excel sheet 2. List of 29 genes that acquired close chromatin in nos-1(gv5)nos-2(RNAi) L1 PGCs. [file elife-30201-supp2.xlsx]

## Sheet: open chromatin in nos
			Gene expression
Gene name	Wormbase ID	locus	Wild-type L1 PGC (RPKM)	nos-1/2 L1 PGC (RPKM)	log2.fold_change.	q_value
AC8.11	WBGene00043989	chrX	11.3112	10.0527	-0.170165	0.918188
B0272.3	WBGene00007129	chrX	3.60519	35.7896	3.31139	0.000637728
B0303.7	WBGene00015128	chrIII	1.37332	15.8751	3.53103	0.000903635
B0416.5	WBGene00015181	chrX	2.67923	141.847	5.72637	2.32e-07
C02B4.3	WBGene00007259	chrX	0.0149713	0	-1.79769e+308	1
C05G5.4	WBGene00007350	chrX	1.3335	52.1365	5.289	6.36e-09
C08A9.6	WBGene00015586	chrX	0.128753	3.43441	4.73739	0.0271641
C09E7.4	WBGene00015638	chrIII	3.40089	19.3936	2.51159	0.00387277
C11E4.8	WBGene00007522	chrX	0	0.23027	1.79769e+308	1
C11H1.8	WBGene00007532	chrX	0.360592	85.6671	7.89223	3.99e-06
C17G1.5	WBGene00007652	chrX	1.05054	14.4113	3.778	0.000489758
C25A11.1	WBGene00016086	chrX	0.270132	4.41894	4.03196	0.0800777
C25A11.2	WBGene00016087	chrX	0.135219	12.3324	6.51101	7.1e-06
C27A12.4	WBGene00016155	chrI	0.516632	3.25049	2.65345	0.123746
C27C12.4	WBGene00007774	chrX	1.47046	20.9373	3.83173	4.43e-05
C31C9.7	WBGene00007841	chrII	0.520734	0.0413183	-3.65569	1
C31E10.5	WBGene00007846	chrX	11.5255	40.0544	1.79713	0.0344899
C31E10.7	WBGene00007848	chrX	3.73663	20.2963	2.44141	0.0611958
C33A11.2	WBGene00007878	chrX	0.253783	1.47001	2.53416	0.320106
C36C9.1	WBGene00016485	chrX	4.59904	24.8984	2.43665	0.00254622
C36E6.1	WBGene00016489	chrX	3.98551	23.1139	2.53592	0.0248949
C36E6.2	WBGene00016490	chrX	2.2628	9.94898	2.13644	0.359818
C45B2.6	WBGene00016661	chrX	20.2045	55.1121	1.44769	0.112992
C49F5.6	WBGene00008210	chrX	0.416488	131.534	8.30295	0
D1007.15	WBGene00017010	chrI	0.673762	6.668	3.30694	0.000391891
D1022.4	WBGene00017023	chrII	2.04049	8.09705	1.98848	0.117135
F08C6.2	WBGene00017241	chrX	1.25257	21.0894	4.07356	0.00609629
F08G12.2	WBGene00008586	chrX	3.936	63.3047	4.00751	1.08e-06
F08G12.5	WBGene00008588	chrX	0.141327	11.2565	6.31558	0.037274
F10G7.5	WBGene00017369	chrII	3.23618	16.8719	2.38226	0.00950404
F16A11.1	WBGene00008876	chrI	110.998	39.9335	-1.47486	0.17579
F16B12.4	WBGene00008880	chrX	2.80001	35.2498	3.65411	0.000278083
F16B12.6	WBGene00008882	chrX	4.95563	46.7926	3.23914	2.13e-05
F21C10.3	WBGene00017653	chrV	0.459014	4.98808	3.44188	0.228653
F23F12.12	WBGene00017756	chrIII	0.139824	0.791079	2.50021	0.393408
F26A3.4	WBGene00009142	chrI	2.11353	34.1307	4.01335	3.62e-05
F28B12.1	WBGene00017894	chrII	3.55631	9.90837	1.47826	0.394923
F28H1.1	WBGene00017908	chrI	0.244477	10.1301	5.37281	0.000485143
F31A3.5	WBGene00017939	chrX	0.223257	4.93169	4.46531	0.000252901
F31E9.6	WBGene00009299	chrV	4.45549	18.2311	2.03274	0.0376183
F33G12.6	WBGene00018018	chrII	4.29456	7.78246	0.857716	0.485275
F35H10.3	WBGene00018069	chrIV	0.159958	4.16897	4.70393	0.11296
F39C12.1	WBGene00018193	chrX	0.603649	10.0647	4.05945	1.29e-07
F39F10.3	WBGene00018203	chrX	0.374691	7.61712	4.34547	0.00765203
F41B4.3	WBGene00018259	chrX	2.98192	151.256	5.6646	2.59e-07
F42F12.3	WBGene00009635	chrX	2.83907	97.3622	5.09987	8.16e-08
F43E12.1	WBGene00044577	chrX	0	0	0	1
F46H5.3	WBGene00018519	chrX	22.7586	255.416	3.48836	0.000262852
F47B3.4	WBGene00018528	chrI	0.0915631	0.183992	1.00681	1
F47G4.2	WBGene00009823	chrI	1.15244	12.1516	3.39838	0.000793101
F47G4.4	WBGene00009825	chrI	0.248725	3.35285	3.75276	0.00586939
F48E3.3	WBGene00018604	chrX	11.6082	54.2817	2.22532	0.00596218
F48F7.6	WBGene00009851	chrX	0.59473	8.35075	3.8116	0.0065015
F49E2.5	WBGene00009888	chrX	0.776001	8.48285	3.45042	0.480492
F52B5.7	WBGene00009923	chrI	2.75133	6.66498	1.27647	0.30362
F52G3.4	WBGene00018712	chrX	0.0715081	0.156981	1.13441	1
F52H3.4	WBGene00009946	chrII	84.8949	23.9497	-1.82567	0.025634
F53H4.5	WBGene00010010	chrX	0.0343818	0.143773	2.06407	1
F54B11.5	WBGene00010028	chrX	7.23274	56.8377	2.97423	0.000326087
F54D10.3	WBGene00018804	chrII	4.03403	97.1487	4.5899	8.37e-08
F54F7.7	WBGene00010067	chrX	0.0297851	0.0211671	-0.492772	1
F56D2.5	WBGene00018966	chrIII	3.94489	28.3227	2.8439	0.000849976
F56F3.4	WBGene00010155	chrIII	0.548739	3.90268	2.83027	0.0329049
F57G8.5	WBGene00010214	chrV	0.219977	0.745545	1.76094	0.411217
F59B2.8	WBGene00010310	chrIII	0.395558	35.0065	6.46759	5.76e-07
F59F5.7	WBGene00010345	chrX	0.0100968	0.193089	4.2573	1
H35N09.2	WBGene00019266	chrX	0.845097	12.8296	3.92422	0.000671557
H40L08.1	WBGene00010433	chrX	9.071	53.9471	2.57221	0.00124999
K02D7.5	WBGene00019300	chrIV	0.187288	3.19684	4.09332	0.029695
K02E2.6	WBGene00010507	chrV	0.842642	7.70671	3.19312	0.0336127
K04C1.2	WBGene00010552	chrX	0.308017	39.3003	6.99539	3.34e-09
K06B4.4	WBGene00010599	chrV	0.29749	0.337077	0.180239	0.983339
K08H2.3	WBGene00010690	chrX	2.63672	4.85147	0.879677	0.540004
K09E3.7	WBGene00019578	chrX	0.380709	8.69849	4.514	2.33e-05
K09E9.3	WBGene00010726	chrX	14.7358	59.0785	2.00331	0.0163768
M02E1.3	WBGene00023458	chrX	93.3129	61.8983	-0.592176	0.584661
M151.7	WBGene00019799	chrII	0.251165	3.56656	3.82783	0.0142371
M60.6	WBGene00019781	chrX	0.234225	9.31306	5.31329	0.0015054
R03A10.1	WBGene00010981	chrX	0.0891587	40.6357	8.83216	0.0798001
R03G5.6	WBGene00019847	chrX	0.820573	35.954	5.45338	0.185027
R04E5.9	WBGene00019872	chrX	5.63856	39.2858	2.80061	0.000764045
R07E4.3	WBGene00019937	chrX	25.5503	203.53	2.99383	0.00100717
R08E3.3	WBGene00019959	chrX	35.2137	214.182	2.60463	0.0088819
R09A8.1	WBGene00011152	chrX	1.04027	27.0963	4.70306	4.62e-08
T04D3.1	WBGene00011431	chrI	0.298758	37.533	6.97304	3.65e-08
T04G9.1	WBGene00020214	chrX	0.123125	7.92304	6.00786	9.66e-08
T05H10.4	WBGene00011509	chrII	0.400748	12.0684	4.9124	8.18e-05
T07E3.4	WBGene00020315	chrIII	1.86551	26.4457	3.8254	0.199455
T09B9.4	WBGene00011645	chrX	2.27595	12.8422	2.49635	0.00607376
T10B10.3	WBGene00011680	chrX	1.40512	22.0783	3.97386	0.000590572
T10C6.7	WBGene00011689	chrV	0.060917	2.98522	5.61485	0.0727884
T12D8.4	WBGene00011732	chrIII	1.88576	4.90145	1.37806	0.249449
T14G8.2	WBGene00011770	chrX	0.150931	3.94103	4.70661	0.0331133
T19H5.4	WBGene00011849	chrII	0.199461	9.45347	5.56666	0.000226301
T20F7.1	WBGene00020630	chrX	9.36664	39.2343	2.06651	0.0131832
T22B7.4	WBGene00020673	chrX	0.628798	5.91616	3.23399	0.00372773
T23C6.4	WBGene00020726	chrX	0.047335	1.5935	5.07315	0.181604
T23F2.5	WBGene00020738	chrX	1.79883	31.5664	4.13326	0.00681538
T24B8.4	WBGene00011978	chrII	0.0589566	0.357352	2.59962	0.292792
T24C4.2	WBGene00020758	chrIII	0.286035	4.30804	3.91277	0.0157666
T24D5.5	WBGene00011993	chrX	1.95429	23.9828	3.61728	0.000112618
T24D5.6	WBGene00044149	chrX	0.163804	1.59757	3.28584	0.322178
T24E12.2	WBGene00020772	chrII	0.0350283	0.154667	2.14257	1
T26C11.4	WBGene00020830	chrX	0.421824	11.1742	4.72739	1.47e-05
T26E4.9	WBGene00012051	chrV	0.0797828	0	-1.79769e+308	1
T26F2.3	WBGene00045401	chrV	1.15966	140.912	6.92495	1.67e-10
T28F2.1	WBGene00020900	chrI	0.106905	2.19913	4.36253	0.0993559
W01B6.6	WBGene00012173	chrIV	0.0899609	1.12752	3.64771	0.285091
W02D7.9	WBGene00020944	chrV	13.1728	66.2818	2.33105	0.198564
W02D9.10	WBGene00012216	chrI	1.26249	11.7904	3.22327	0.0109487
W05H9.3	WBGene00021050	chrX	0.937229	12.6589	3.75561	0.000548998
W05H9.4	WBGene00021051	chrX	2.35691	26.4018	3.48567	1.59e-05
W06D11.4	WBGene00012302	chrX	0.0239091	0.0927298	1.95548	1
Y13C8A.1	WBGene00021188	chrX	1.56878	6.25458	1.99527	0.4037
Y32G9B.1	WBGene00021309	chrV	1.25364	0.882864	-0.505858	0.774672
Y34B4A.2	WBGene00021319	chrX	6.81834	39.7136	2.54214	0.00449622
Y37E11B.2	WBGene00021375	chrIV	2.09351	7.53554	1.84779	0.153545
Y40A1A.3	WBGene00021485	chrX	0.19195	7.11032	5.21111	0.00285402
Y43F8B.2	WBGene00012813	chrV	3.84731	55.0118	3.83782	0.000708498
Y44A6D.3	WBGene00012854	chrV	0.925107	6.38261	2.78646	0.0437045
Y54G2A.45	WBGene00044488	chrIV	0.878566	1.34563	0.615058	0.750256
Y58A7A.3	WBGene00021977	chrV	8.241	8.98451	0.124622	0.937271
Y59E1B.2	WBGene00021991	chrX	1.46958	3.84897	1.38907	0.657044
Y71A12B.12	WBGene00013509	chrI	1.03876	17.3143	4.05902	1.49e-05
ZC373.5	WBGene00013870	chrX	0.0758262	2.74325	5.17705	0.101266
ZC504.3	WBGene00013917	chrX	6.87395	72.2095	3.39298	1.15e-05
ZC84.3	WBGene00013847	chrIII	2.34645	23.0265	3.29475	9.61e-05
ZK154.6	WBGene00022668	chrX	0.129141	31.8047	7.94415	0.0395031
ZK177.9	WBGene00022674	chrII	0.13168	76.0401	9.17358	0.0362731
ZK470.2	WBGene00022745	chrX	1.43787	16.1845	3.49261	0.0565343
ZK863.8	WBGene00014125	chrV	0.385245	1.46334	1.92542	0.472274
F59F4.4	WBGene00010339	chrX	3.23999	24.9937	2.9475	0.00185929
M03F4.2	WBGene00000066	chrX	11.3745	18.5526	0.705811	0.60336
C04A11.4	WBGene00000074	chrX	0.442776	32.752	6.20886	8.72e-11
R13G10.2	WBGene00000137	chrIII	0.539468	12.3174	4.51301	6.13e-06
F53H8.1	WBGene00000164	chrX	0.449201	40.9005	6.50861	7.13e-08
F02E8.3	WBGene00000157	chrX	2.47056	84.9457	5.10363	1.18e-06
F02E8.1	WBGene00000207	chrX	39.3067	318.026	3.0163	0.000113173
T08A9.1	WBGene00020334	chrX	1.01161	32.4306	5.00263	1.01e-09
T07H3.2	WBGene00020325	chrII	0.0541747	0.0516999	-0.0674569	1
F08F1.5	WBGene00000422	chrX	1.3172	6.20514	2.23599	0.0537409
F35C8.7	WBGene00018037	chrX	0.287661	5.07806	4.14184	0.00347125
AH9.2	WBGene00000797	chrX	0.183753	59.7341	8.34465	6.84e-06
F14H12.4	WBGene00017472	chrX	0.763419	17.1258	4.48755	0.000285352
F09B12.2	WBGene00008606	chrX	0.0262554	4.24999	7.3387	0.0790046
K08B12.2	WBGene00019521	chrV	0.214714	6.53522	4.92775	0.093497
W03A5.7	WBGene00001042	chrIII	1.5182	25.8127	4.08765	0.000517726
C55B6.2	WBGene00001025	chrX	5.07254	17.6392	1.79801	0.0461922
F47A4.2	WBGene00001081	chrX	0.454875	11.6203	4.67504	1.1e-08
C02C6.1	WBGene00001130	chrX	0.503265	20.2064	5.32735	5.48e-08
R53.3	WBGene00001207	chrII	2.02759	5.75275	1.50448	0.724973
Y26E6A.1	WBGene00012512	chrX	0.247002	12.8964	5.7063	1.49e-05
F52C12.5	WBGene00001253	chrIV	0.437385	2.49418	2.51159	0.101758
K09A9.3	WBGene00010701	chrX	0.79004	4.2076	2.413	0.0462495
Y102A5C.14	WBGene00013620	chrV	11.2009	9.55656	-0.229056	0.873131
B0391.5	WBGene00007162	chrV	0.829285	55.5586	6.066	2.48e-08
C18B12.5	WBGene00007667	chrX	2.10677	23.0261	3.45017	0.000973282
F52D2.4	WBGene00001569	chrX	0.784242	27.4909	5.13151	1.53e-08
F14F3.2	WBGene00008805	chrX	0.156501	14.5977	6.54343	1.34e-06
T10C6.14	WBGene00001875	chrV	368.45	3328.49	3.17533	6.72e-05
F17E9.10	WBGene00001906	chrIV	23.2358	1215.3	5.70883	9.4e-13
F17E9.9	WBGene00001908	chrIV	29.1318	270.469	3.2148	0.000113173
F20B6.8	WBGene00001994	chrX	1.10905	7.55066	2.76728	0.0258545
C12C8.1	WBGene00002026	chrI	5.58773	22.8705	2.03315	0.0756758
C34F6.4	WBGene00002029	chrX	0.250762	13.4049	5.7403	0.000435098
C05D9.5	WBGene00002062	chrX	0.24159	10.7984	5.48212	0.0100566
T02C5.3	WBGene00020160	chrX	0.220684	4.46309	4.33799	0.189559
F08G12.10	WBGene00002124	chrX	0.176328	63.6718	8.49625	1.53e-08
F35C8.3	WBGene00002177	chrX	0.0930553	2.89836	4.96101	0.00845632
F13B9.5	WBGene00002239	chrX	0.40341	2.42476	2.58753	0.479911
F52H3.7	WBGene00002265	chrII	1.65519	2.82642	0.771981	0.563479
C04F1.3	WBGene00002989	chrI	0.102667	6.51882	5.98857	0.00322784
C03B1.12	WBGene00003053	chrX	0.646614	33.5041	5.69529	1.25e-06
F48E8.1	WBGene00003055	chrIII	0.563044	3.86672	2.77979	0.344889
T08D10.2	WBGene00011615	chrX	2.36261	57.2462	4.59873	4.93e-08
F49H12.1	WBGene00003087	chrX	7.64673	85.8674	3.4892	0.000911267
K10B3.9	WBGene00003124	chrX	0	4.87882	1.79769e+308	0.604394
T04C10.1	WBGene00003149	chrX	0.972877	20.2167	4.37715	5.39e-07
W10D5.1	WBGene00003182	chrI	3.27425	17.3947	2.40941	0.013886
K02B9.1	WBGene00010492	chrX	0.54938	4.69754	3.09603	0.02091
K02B9.2	WBGene00010493	chrX	0.0546652	6.22668	6.83169	0.00141139
F54F7.5	WBGene00003219	chrX	0.147422	16.243	6.78372	1.61e-08
T07H6.2	WBGene00003394	chrX	0.494481	3.07369	2.63599	0.061202
F21G4.2	WBGene00003410	chrX	0.0834842	33.6789	8.65613	7.32e-10
H28G03.6	WBGene00003477	chrX	0.191463	12.4827	6.02672	2.63e-09
ZK470.5	WBGene00006410	chrX	0.473523	29.2015	5.94646	0.00119965
ZC168.1	WBGene00003568	chrIV	0.318352	5.06253	3.99116	0.000616312
Y5H2B.2	WBGene00003612	chrV	2.18451	25.112	3.523	0.00162443
F44A6.1	WBGene00009674	chrX	0.184782	18.2899	6.62908	0.00491158
F52E4.1	WBGene00018701	chrX	4.34462	55.481	3.67469	0.000169597
C10F3.5	WBGene00003954	chrV	2.1052	103.108	5.61406	5.71e-08
F46C3.1	WBGene00003970	chrX	5.3835	85.2207	3.98459	1.5e-07
VF11C1L.1	WBGene00004089	chrX	3.15417	29.701	3.23518	2.48e-05
T25G12.4	WBGene00004270	chrX	0.229504	3.75515	4.03228	0.0496032
F56B6.2	WBGene00004350	chrX	0.151606	4.49887	4.89116	0.733338
ZC53.7	WBGene00004352	chrX	5.0987	1.98379	-1.36187	0.291082
R11G1.4	WBGene00004727	chrX	15.2232	53.0808	1.80192	0.0484869
H20J18.1	WBGene00004739	chrX	0.168504	1.24184	2.88163	0.0930678
F52E10.1	WBGene00004745	chrX	7.47038	88.9044	3.573	1.9e-06
C35C5.1	WBGene00004746	chrX	0.768125	2.13656	1.47588	0.191859
C25D7.3	WBGene00004747	chrV	2.07024	24.9947	3.59375	2.05e-06
F35H12.3	WBGene00004769	chrX	0.153684	6.62607	5.43011	0.00123664
F44A6.2	WBGene00004786	chrX	0.17493	2.86033	4.03133	0.0154035
C54H2.5	WBGene00004788	chrX	0.406522	6.71065	4.04505	0.00664518
F07H5.2	WBGene00004790	chrII	0.0909822	0.749211	3.04172	0.313546
C42D4.6	WBGene00004822	chrIV	14.941	118.061	2.98219	0.000350761
C07A12.5	WBGene00005008	chrX	0.110129	23.0369	7.70861	7.03e-07
Y39C12A.7	WBGene00012709	chrIV	0.0762409	0.323521	2.08522	1
R08H2.3	WBGene00005386	chrV	0.0825768	0.372603	2.17383	0.584968
F15H9.3	WBGene00005529	chrI	0.193906	0.174207	-0.15455	1
C06B3.4	WBGene00007363	chrV	11.5691	420.948	5.1853	3.93e-11
F48D6.1	WBGene00006393	chrX	4.73297	28.4632	2.58828	0.00345291
B0334.1	WBGene00007142	chrII	1.17045	0.726173	-0.688676	0.792182
T01B4.2	WBGene00006675	chrX	0.0808056	0.0641244	-0.333582	1
F09B9.2	WBGene00006839	chrX	0.287531	3.98901	3.79424	0.00153562
K10D3.2	WBGene00006753	chrI	1.93029	51.7446	4.74452	6.24e-09
F27D9.1	WBGene00006757	chrX	0.513477	17.0444	5.05286	0.342706
F54B11.3	WBGene00006816	chrX	0.254418	8.70093	5.0959	0.0261353
D2021.1	WBGene00017046	chrX	0.193757	30.4146	7.29437	3.98e-11
F20B6.2	WBGene00006921	chrX	0.975036	33.7694	5.11412	3.29e-08
C18A11.5	WBGene00006962	chrX	0.845297	29.55	5.12755	3.72e-05

## Sheet: close chromatin in nos
			Gene expression
Gene name	Wormbase ID	locus	Wild-type L1 PGC (RPKM)	nos-1/2 L1 PGC (RPKM)	log2.fold_change.	q_value
B0001.7	WBGene00007092	chrIV	126.78	56.4194	-1.16807	0.239113
C03A7.12	WBGene00015370	chrV	0.709633	0.186813	-1.92548	0.496523
C07G3.2	WBGene00015574	chrV	0.20326	0.3852	0.922282	0.808887
C41D11.6	WBGene00016565	chrI	47.3715	3.60449	-3.71615	2.99e-07
F26F4.5	WBGene00017827	chrIII	38.0755	31.8924	-0.255652	0.836692
F26H9.5	WBGene00009177	chrI	106.761	49.8183	-1.09964	0.236088
F45F2.11	WBGene00018483	chrV	107.955	30.3811	-1.82918	0.0332958
F55A3.7	WBGene00018852	chrI	185.716	37.7633	-2.29804	0.00284547
K12D12.5	WBGene00010787	chrII	54.5895	31.4674	-0.794768	0.431699
R07E5.13	WBGene00011119	chrIII	284.496	132.773	-1.09945	0.249894
T07C4.3	WBGene00011560	chrIII	165.997	101.219	-0.713674	0.618333
T08B2.4	WBGene00020345	chrI	117.757	65.0871	-0.855375	0.412863
T26A5.5	WBGene00020821	chrIII	90.0235	62.167	-0.534153	0.69171
W02D9.4	WBGene00012210	chrI	91.4341	12.6906	-2.84898	0.000113062
Y14H12B.2	WBGene00021192	chrII	127.381	38.6162	-1.72187	0.0410407
Y18D10A.16	WBGene00012483	chrI	68.4591	25.5148	-1.42391	0.14988
Y47H9C.15	WBGene00012957	chrI	4.46964	4.65487	0.0585828	0.986424
Y54F10AM.11	WBGene00021853	chrIII	27.0645	8.40025	-1.6879	0.083927
Y57E12AM.1	WBGene00021960	chrV	94.0465	101.194	0.105682	0.948923
Y65B4BL.6	WBGene00022038	chrI	4.48635	8.30576	0.88857	0.896027
ZC262.4	WBGene00022581	chrIII	5.94532	10.5843	0.832097	0.574067
C03A7.14	WBGene00000031	chrV	1.88098	0.0992287	-4.24458	0.0160753
F43G9.9	WBGene00000777	chrI	274.678	120.958	-1.18323	0.23395
E04A4.4	WBGene00001983	chrIV	254.114	121.943	-1.05926	0.321797
ZK858.4	WBGene00003209	chrI	255.816	135.591	-0.915849	0.38497
C06A1.5	WBGene00007355	chrII	319.488	161.73	-0.982175	0.329435
W07G1.6	WBGene00012333	chrII	0.0364757	0.0904065	1.30949	1
F39H2.4	WBGene00006377	chrI	129.446	112.086	-0.207742	0.933926
T07G12.11	WBGene00011601	chrIV	212.149	89.1943	-1.25006	0.187528
