# Supplementary material for: Nanos promotes epigenetic reprograming of the germline by down-regulation of the THAP transcription factor LIN-15B
Source: eLife. 2017 Nov 7;6:e30201. doi: 10.7554/eLife.30201 (PMC5734877; doi:10.7554/eLife.30201)
Supplement: Supplementary file 3. [file elife-30201-supp3.xlsx]

## Sheet: Sheet1
Table S3
	Average FPKM
	chrX	autosomes	X/A ratio
Early embryos	19.78	39.36	0.5
L1 PGCs(starved)	4.66	50.93	0.09
L1 PGCs(fed)	5.3	49.48	0.11
L1 nos-1(gv5)nos-2(RNAi) PGCs (starved)	9.6	43.84	0.22
L1 nos-1(gv5)nos-2(RNAi);lin-15B(RNAi) PGCs (starved)	5.5	47.25	0.12
L1 nos-1(gv5)nos-2(RNAi) PGCs (fed)	9.43	42.51	0.22
L1 mes-2(RNAi) PGCs (fed)	6.6	43	0.15
L1 mes-4(RNAi) PGCs (fed)	8.66	43.34	0.2
