# Supplementary material for: Nanos promotes epigenetic reprograming of the germline by down-regulation of the THAP transcription factor LIN-15B
Source: eLife. 2017 Nov 7;6:e30201. doi: 10.7554/eLife.30201 (PMC5734877; doi:10.7554/eLife.30201)
Supplement: Supplementary file 4. [file elife-30201-supp4.xlsx]

## Sheet: Sheet1
		EMB PGC comparison			L1 PGC comparison
	Gene name	WT RPKM	nos-1(gv5) nos-2(RNAi) RPKM	q value	WT RPKM	nos-1(gv5) nos-2(RNAi) RPKM	q value
mes genes	mes-2	80	31	0.32	95	62	0.44
	mes-3	29	20	0.93	61	55	0.9
	mes-4	73	58	1	37	85	0.12
	mes-6	305	546	0.94	1291	673	0.26
SynMuv B genes	lin-15B	9.1	25	0.15	4.1	51	3.49e-0.9
	lin-35	55	80	0.94	71	80	0.85
	dpl-1	52	79	0.96	74	51	0.61
	efl-1	50	35	0.94	42	33	0.75
	lin-9	106	70	0.95	79	82	0.96
	lin-37	54	58	1	103	47	0.2
	lin-52	71	63	1	116	58	0.37
	lin-54	46	63	0.99	52	45	0.86
Maternally inherited transcription factors that are down-regulated during embryo-to-L1 transition	ast-1	25.5	23.5	1	0	0.35	0.388659
	ceh-83	42.188	90.0707	0.668088	6	65.6	2.6e-05
	ceh-99	44.4364	60.4624	0.972064	4.59175	21.3738	0.0462162
	ces-2	25.6645	19.1376	1	0.0825595	0.505246	0.57147
	egl-46	19.3527	18.0352	1	0.0493531	1.47213	0.232531
	hbl-1	12.1112	9.02699	1	0.0685736	8.98503	0.0253922
	hlh-1	16.4503	11.754	1	0.0416903	6.22521	0.0680262
	hnd-1	64.9316	503.269	6.35e-06	2.83233	255.659	1.25e-05
	lim-7	19.4108	15.8652	1	0.0369067	1.25932	0.244322
	pha-4	8.53829	8.15837	1	0.047702	2.62828	0.108851
	sox-2	20.5311	13.6674	0.935042	0.030169	0.162939	1
	tbx-2	27.0726	38.5057	0.93846	1.05824	11.7696	0.0176664
	unc-39	24.6686	39.6939	0.93145	0	0.721985	0.317233
	zip-2	21.1924	13.6411	0.93145	2.54422	15.3784	0.0301371
Somatic transcriptional regulator	utx-1	3.5	8.4	0.65	0.08	17	0.001
Germ granule protein	meg-3	3.2	24	0.0024	0.1	9.8	0.0028
Stem cells	sygl-1	673.2	443.6	0.967881	2335.22	501.2	0.0003
Oocyte marker	lin-41	12.5714	22.8873	0.93145	12.3119	62.7485	0.000653191
