# Supplementary material for: Nanos promotes epigenetic reprograming of the germline by down-regulation of the THAP transcription factor LIN-15B
Source: eLife. 2017 Nov 7;6:e30201. doi: 10.7554/eLife.30201 (PMC5734877; doi:10.7554/eLife.30201)
Supplement: Supplementary file 5. — Data sheets contain significantly up- and downregulated genes from pairwise comparisons using ciffdiff as described in the methods section. FPKM values were extracted from differential expression analysis between wild-type and nos-1(gv5)nos-2(RNAi) PGCs using SMART-seq libraries. [file elife-30201-supp5.xlsx]

## Sheet: INFOMATION
Table S5. Lists of genes from differential expression analyses
Data sheets contain significantly up- and downregulated genes from pairwise comparisons
Name of excel sheet	library prep. Method	Description	related to # figure
SMART-seq WT-L1 vs nos-1/2 L1	SMART-seq	Compare wild-type L1 with nos-1(gv5)nos-2(RNAi) L1 PGCs	Figure 1
SMART-seq WT emb vs L1	SMART-seq	Compare wild-type PGC between embryonic and L1 stage	Figure 2
SMART-seq nos-1/2 emb vs L1	SMART-seq	Compare nos-1(gv5)nos-2(RNAi) PGC between embryonic and L1 stage	Figure 2
SMART-seq WT-emb vs nos-1/2-emb	SMART-seq	Compare wild-type EMB with nos-1(gv5)nos-2(RNAi) EMB PGCs	Figure 2-supp. 1
Truseq_Starved_WT-L1_vs_nos-L1	Truseq	Compare starved wild-type L1 with starved nos-1(gv5)nos-2(RNAi) L1 PGCs	Figure 1-supp. 1, Figure 3, Figure 6
Truseq_Fed_WT-L1_vs_nos-L1	Truseq	Compare fed wild-type L1 with fed nos-1(gv5)nos-2(RNAi) L1 PGCs	Figure 4, Figure 4-supp. 1
Truseq_Fed_L1_WT_vs_mes-2	Truseq	Compare fed wild-type L1 with fed mes-2(RNAi) L1 PGCs	Figure 4-supp. 2
Truseq_Fed_L1_WT_vs_mes-4	Truseq	Compare fed wild-type L1 with fed mes-4(RNAi) L1 PGCs	Figure 4, Figure 4-supp. 1
Truseq_starved_lin15B-resuce	Truseq	Compare starved nos-1(gv5)nos-2(RNAi) L1 with starved nos-1(gv5)nos-2(RNAi);lin-15B(RNAi) L1 PGCs	Figure 6F
NuGEN_EMB_soma_vs_PGCs	NuGEN	Compare EMB somatic cells vs EMB PGCs	Figure 2-supp. 1

## Sheet: Smartseq_WT-L1_vs_nos-L1
test_id	gene_ID	Wormbase ID	locus	locus.1	wild-type L1 PGCs FPKM	nos-1/2 L1 PGCs FPKM	log2.fold_change.	q_value	significant
AH9.1	AH9.1	WBGene00014998	chrX	chrX:2243593-2247000	1.11153	17.5114	3.97768	0.0146488	yes
B0001.6	B0001.6	WBGene00007091	chrIV	chrIV:12156815-12164244	1.56378	17.979	3.52321	0.00396408	yes
B0001.7	B0001.7	WBGene00007092	chrIV	chrIV:12151169-12154220	137.493	46.1287	-1.57562	0.0191243	yes
B0205.13	B0205.13	WBGene00044644	chrI	chrI:10727739-10728784	12.1399	107.618	3.1481	0.0122628	yes
B0212.3	B0212.3	WBGene00015037	chrIV	chrIV:3540183-3543598	0.622437	13.0969	4.39516	0.00667051	yes
B0228.7	B0228.7	WBGene00015064	chrII	chrII:7757137-7758387	495.431	125.903	-1.97637	0.0019209	yes
B0272.3	B0272.3	WBGene00007129	chrX	chrX:9431372-9432648	0.0146494	11.0262	9.55588	0.0156043	yes
B0273.1	B0273.1	WBGene00015097	chrIV	chrIV:5493985-5495241	0.0396528	3.55505	6.4863	0.0351873	yes
B0280.1	B0280.1	WBGene00015099	chrIII	chrIII:7133726-7136398	407.446	112.009	-1.863	0.0107057	yes
B0284.1	B0284.1	WBGene00007131	chrIII	chrIII:4376956-4379172	0.870046	57.4004	6.04383	4.99e-05	yes
B0284.2	B0284.2	WBGene00007132	chrIII	chrIII:4381955-4384113	9.80999	80.0305	3.02823	0.000315893	yes
B0303.7	B0303.7	WBGene00015128	chrIII	chrIII:8693556-8699374	2.31502	19.8083	3.09701	0.0468618	yes
B0304.4	B0304.4	WBGene00015136	chrII	chrII:4522470-4523219	728.577	126.257	-2.52872	6.25e-05	yes
B0336.5	B0336.5	WBGene00015145	chrIII	chrIII:5692874-5693893	409.435	101.73	-2.0089	0.00751966	yes
B0365.1	B0365.1	WBGene00007150	chrV	chrV:13116487-13120120	23.699	71.9348	1.60186	0.0258581	yes
B0393.5	B0393.5	WBGene00007170	chrIII	chrIII:4769041-4778021	0.200844	8.09129	5.33222	0.0116175	yes
B0395.3	B0395.3	WBGene00007175	chrX	chrX:16034990-16039442	0.388277	11.4173	4.87798	0.0190258	yes
B0414.8	B0414.8	WBGene00015176	chrI	chrI:5803955-5807294	284.542	107.171	-1.40873	0.0391236	yes
B0416.5	B0416.5	WBGene00015181	chrX	chrX:9268574-9270794	1.2585	194.954	7.27529	3.35e-11	yes
B0507.10	B0507.10	WBGene00015227	chrV	chrV:8758797-8760469	1.14546	45.7783	5.32066	0.000191644	yes
B0507.2	B0507.2	WBGene00015219	chrV	chrV:8774309-8776459	0.0760522	14.2761	7.5524	0.0018329	yes
B0507.6	B0507.6	WBGene00015223	chrV	chrV:8746135-8753044	0	29.2622	1.79769e+308	0.000693479	yes
B0507.8	B0507.8	WBGene00015225	chrV	chrV:8760664-8762730	0.0139764	20.3714	10.5093	0.00648115	yes
B0507.9	B0507.9	WBGene00015226	chrV	chrV:8764930-8766016	0	44.9818	1.79769e+308	0.00669385	yes
B0511.11	B0511.11	WBGene00015236	chrI	chrI:10648594-10650163	5.14396	69.7053	3.76032	0.000276583	yes
B0564.11	B0564.11	WBGene00023421	chrIV	chrIV:13105312-13106889	15.8416	64.2269	2.01946	0.0151043	yes
BE0003N10.1	BE0003N10.1	WBGene00015266	chrIII	chrIII:1037498-1046038	16.2714	2.81444	-2.53142	0.0132554	yes
C01A2.3	C01A2.3	WBGene00007215	chrI	chrI:13387807-13391439	65.13	21.5599	-1.59497	0.0440728	yes
C01B12.2	C01B12.2	WBGene00015285	chrII	chrII:19537-22158	0.134296	23.6782	7.46199	0.0107553	yes
C01F1.3	C01F1.3	WBGene00015298	chrII	chrII:4295102-4299008	105.194	9.91246	-3.40767	0.00220714	yes
C01G10.10	C01G10.10	WBGene00007237	chrV	chrV:15080148-15082462	244.977	83.6147	-1.55082	0.0222967	yes
C01G6.3	C01G6.3	WBGene00007225	chrII	chrII:9269833-9271207	0.500164	22.6709	5.5023	0.00405	yes
C01G8.1	C01G8.1	WBGene00015312	chrI	chrI:5272849-5274325	187.494	35.6088	-2.39654	0.00669385	yes
C02B10.2	C02B10.2	WBGene00015327	chrIV	chrIV:5090281-5091025	146.267	21.0642	-2.79574	0.00117564	yes
C02B8.6	C02B8.6	WBGene00015324	chrX	chrX:8133125-8136279	0.0128542	4.35975	8.40587	0.0322224	yes
C02E11.1	C02E11.1	WBGene00015344	chrV	chrV:1042692-1048583	1.86168	13.8234	2.89244	0.00471366	yes
C03A3.2	C03A3.2	WBGene00007267	chrX	chrX:11262780-11266247	0.429854	8.23266	4.25944	0.0372882	yes
C03H12.1	C03H12.1	WBGene00007284	chrX	chrX:15689389-15696290	0.00986397	9.3068	9.8819	0.00812253	yes
C04E6.11	C04E6.11	WBGene00015425	chrV	chrV:5914089-5917831	148.83	54.1652	-1.45822	0.0302248	yes
C04F12.1	C04F12.1	WBGene00007297	chrI	chrI:9673658-9678544	2.12486	19.7384	3.21557	0.000781538	yes
C04F5.9	C04F5.9	WBGene00015451	chrV	chrV:5114733-5119194	96.7741	23.3095	-2.0537	0.00413093	yes
C05C10.7	C05C10.7	WBGene00007334	chrII	chrII:9938052-9938903	1898.05	388.728	-2.28768	0.000115661	yes
C05C8.9	C05C8.9	WBGene00015466	chrV	chrV:7237379-7239640	407.1	115.661	-1.81548	0.0128224	yes
C05D11.5	C05D11.5	WBGene00015483	chrIII	chrIII:6409988-6411506	0.033238	13.1482	8.62782	0.0242767	yes
C05G5.2	C05G5.2	WBGene00007348	chrX	chrX:14747250-14750321	0.0339454	12.6143	8.53763	0.0112918	yes
C05G5.4	C05G5.4	WBGene00007350	chrX	chrX:14753956-14760763	0.879396	16.8416	4.25937	0.00834512	yes
C06A5.6	C06A5.6	WBGene00015504	chrI	chrI:5983231-5985871	95.2487	34.3278	-1.47232	0.0384505	yes
C06E4.8	C06E4.8	WBGene00015537	chrIV	chrIV:7284207-7285509	0	38.3434	1.79769e+308	0.00672818	yes
C06G3.6	C06G3.6	WBGene00015552	chrIV	chrIV:7017614-7020191	2.89777	25.2389	3.12264	0.00270825	yes
C07D8.6	C07D8.6	WBGene00015565	chrX	chrX:7341462-7342730	0.187552	91.62	8.93223	0.000142252	yes
C07E3.6	C07E3.6	WBGene00007417	chrII	chrII:10367851-10369537	0.0134031	5.49821	8.68025	0.0364355	yes
C08F8.3	C08F8.3	WBGene00007445	chrIV	chrIV:11155007-11156613	259.529	78.6698	-1.72201	0.00955923	yes
C08F8.4	C08F8.4	WBGene00007446	chrIV	chrIV:11157127-11159440	0.184961	6.35642	5.10292	0.0354924	yes
C09B7.2	C09B7.2	WBGene00015621	chrX	chrX:2668189-2670582	0.0605397	18.4012	8.2477	0.0339647	yes
C09E7.4	C09E7.4	WBGene00015638	chrIII	chrIII:6534413-6536942	0.0304139	6.10349	7.64876	0.0328035	yes
C09E9.1	C09E9.1	WBGene00007476	chrIV	chrIV:1275864-1277060	140.676	14.6103	-3.26732	0.000566085	yes
C09G5.8	C09G5.8	WBGene00007490	chrII	chrII:10718332-10729193	0.78259	5.48564	2.80933	0.0226028	yes
C10E2.6	C10E2.6	WBGene00015676	chrX	chrX:16767106-16770427	0.0100178	47.1498	12.2005	0.000441459	yes
C10G6.1	C10G6.1	WBGene00015680	chrIV	chrIV:5820358-5830189	1.41973	17.0071	3.58244	0.0100503	yes
C11H1.2	C11H1.2	WBGene00007528	chrX	chrX:14304877-14307697	0	11.5936	1.79769e+308	0.0148369	yes
C13F10.7	C13F10.7	WBGene00015746	chrV	chrV:7221460-7223261	72.9474	12.4898	-2.54611	0.00645487	yes
C13G3.1	C13G3.1	WBGene00007553	chrV	chrV:11011572-11012444	1.4834	261.378	7.46108	2.53e-07	yes
C14A4.3	C14A4.3	WBGene00007556	chrII	chrII:10584284-10587869	37.2101	108.649	1.54591	0.0286941	yes
C14C11.2	C14C11.2	WBGene00015766	chrV	chrV:5660911-5663357	284.424	72.4975	-1.97204	0.00207462	yes
C14F11.1	C14F11.1	WBGene00015778	chrX	chrX:6240918-6242670	0.253787	94.5254	8.54094	0.00269907	yes
C15B12.6	C15B12.6	WBGene00015787	chrX	chrX:6497882-6499799	0.0155966	10.0864	9.33697	0.0206421	yes
C15C6.3	C15C6.3	WBGene00007602	chrI	chrI:12207089-12212197	39.1676	9.39398	-2.05985	0.0123915	yes
C15C7.7	C15C7.7	WBGene00015793	chrX	chrX:3165785-3170498	0	7.28147	1.79769e+308	0.0487159	yes
C15H11.8	C15H11.8	WBGene00007616	chrV	chrV:14422709-14423338	100.1	17.8042	-2.49116	0.0168751	yes
C16C8.11	C16C8.11	WBGene00015849	chrII	chrII:3453766-3454615	353.746	114.278	-1.63017	0.0191355	yes
C16C8.12	C16C8.12	WBGene00015850	chrII	chrII:3452733-3453605	114.717	23.3927	-2.29395	0.00698368	yes
C16C8.13	C16C8.13	WBGene00015851	chrII	chrII:3451423-3452332	85.2182	11.8973	-2.84053	0.00340406	yes
C16C8.14	C16C8.14	WBGene00015852	chrII	chrII:3449255-3450997	121.202	34.5991	-1.8086	0.0155177	yes
C16C8.16	C16C8.16	WBGene00015853	chrII	chrII:3445767-3448742	134.836	42.2927	-1.67272	0.0151843	yes
C16C8.5	C16C8.5	WBGene00015843	chrII	chrII:3444730-3445367	216.821	62.5784	-1.79277	0.0296279	yes
C17E4.2	C17E4.2	WBGene00007642	chrI	chrI:9410606-9416695	1.53075	25.4476	4.05522	0.000166278	yes
C17E4.3	C17E4.3	WBGene00007643	chrI	chrI:9416892-9418866	54.1529	11.7052	-2.20989	0.00983704	yes
C17G1.5	C17G1.5	WBGene00007652	chrX	chrX:9941571-9944715	1.99598	37.3514	4.226	0.000982886	yes
C17H1.3	C17H1.3	WBGene00007656	chrI	chrI:13104241-13106287	0	17.779	1.79769e+308	0.0163731	yes
C17H11.2	C17H11.2	WBGene00015922	chrX	chrX:8169879-8172818	0.352571	10.5031	4.89676	0.0107736	yes
C17H12.13	C17H12.13	WBGene00015938	chrIV	chrIV:6770798-6779848	80.9898	25.9383	-1.64266	0.0384505	yes
C18B12.6	C18B12.6	WBGene00007668	chrX	chrX:15003997-15007238	0.416458	86.4628	7.69777	2.59e-05	yes
C18B2.4	C18B2.4	WBGene00015955	chrX	chrX:3604334-3605737	0.635729	11.5358	4.18157	0.0493553	yes
C18D11.3	C18D11.3	WBGene00007681	chrIII	chrIII:11823347-11824340	144.31	39.3937	-1.87313	0.0173557	yes
C18E3.9	C18E3.9	WBGene00015976	chrI	chrI:4214297-4215754	668.044	199.24	-1.74543	0.0151657	yes
C23F12.4	C23F12.4	WBGene00016009	chrX	chrX:9387376-9389130	1.94528	66.9476	5.10498	0.0014478	yes
C23G10.7	C23G10.7	WBGene00016014	chrIII	chrIII:6195937-6198364	326.714	111.485	-1.55118	0.0224307	yes
C24A1.2	C24A1.2	WBGene00016029	chrIII	chrIII:688733-715835	0.196456	18.9998	6.59564	0.0337874	yes
C24D10.6	C24D10.6	WBGene00016057	chrIV	chrIV:5159477-5160239	109.069	23.4434	-2.21799	0.025267	yes
C24H10.2	C24H10.2	WBGene00016068	chrX	chrX:5064612-5066264	0	12.8995	1.79769e+308	0.0336004	yes
C25A11.2	C25A11.2	WBGene00016087	chrX	chrX:9114311-9116820	0.0270301	23.6679	9.77415	0.000272409	yes
C25G4.11	C25G4.11	WBGene00007737	chrIV	chrIV:12468646-12470216	0	28.0397	1.79769e+308	0.00747911	yes
C25G4.6	C25G4.6	WBGene00007733	chrIV	chrIV:12455093-12456152	1.86547	25.333	3.7634	0.0152463	yes
C25G4.7	C25G4.7	WBGene00007734	chrIV	chrIV:12456936-12458538	0.71293	70.3366	6.62437	0.000113005	yes
C26B2.7	C26B2.7	WBGene00016129	chrIV	chrIV:8016199-8016867	883.271	297.973	-1.56767	0.0191243	yes
C26B2.8	C26B2.8	WBGene00016130	chrIV	chrIV:8014114-8015624	57.5786	10.6276	-2.43772	0.00764206	yes
C26D10.4	C26D10.4	WBGene00007745	chrII	chrII:8329707-8333416	0.0200125	2.42395	6.92031	0.0241297	yes
C26H9A.2	C26H9A.2	WBGene00007752	chrIV	chrIV:12653465-12674749	0.245225	2.93869	3.583	0.00541103	yes
C27C12.1	C27C12.1	WBGene00007771	chrX	chrX:14849246-14853685	1.22388	33.5106	4.77508	0.0036409	yes
C27C12.4	C27C12.4	WBGene00007774	chrX	chrX:14854061-14856449	1.3941	115.163	6.36819	2.74e-07	yes
C27D8.2	C27D8.2	WBGene00007778	chrIV	chrIV:12712764-12714732	0.0308437	7.78799	7.98013	0.029028	yes
C27F2.7	C27F2.7	WBGene00016169	chrIII	chrIII:4980607-4984439	174.557	62.1835	-1.48909	0.0367322	yes
C29E4.13	C29E4.13	WBGene00043051	chrIII	chrIII:7926935-7928669	308.834	40.3469	-2.9363	2.83e-05	yes
C29F7.3	C29F7.3	WBGene00007812	chrX	chrX:13418794-13419836	2.58704	25.195	3.28377	0.0456371	yes
C29F9.6	C29F9.6	WBGene00016221	chrIII	chrIII:115362-116618	0.463897	25.7172	5.79278	0.0108636	yes
C30F12.1	C30F12.1	WBGene00016260	chrI	chrI:6954441-6961138	0.113117	4.74143	5.38943	0.0384505	yes
C30F12.3	C30F12.3	WBGene00016262	chrI	chrI:6970387-6971797	73.7307	20.3933	-1.85417	0.0415736	yes
C30F12.5	C30F12.5	WBGene00016264	chrI	chrI:6992226-6999570	0.494659	42.5034	6.425	0.000498151	yes
C30G12.1	C30G12.1	WBGene00016273	chrII	chrII:7299529-7301449	0.242818	12.1954	5.65032	0.0145056	yes
C30G4.7	C30G4.7	WBGene00016272	chrX	chrX:17056867-17058462	6.18125	129.905	4.39341	2.65e-05	yes
C30H6.9	C30H6.9	WBGene00007826	chrIV	chrIV:17379316-17380133	366.666	79.3793	-2.20763	0.00140903	yes
C31E10.5	C31E10.5	WBGene00007846	chrX	chrX:13991426-13995765	2.75263	33.1275	3.58915	0.000261248	yes
C31E10.6	C31E10.6	WBGene00007847	chrX	chrX:13996237-13999220	0.7268	26.5529	5.19117	0.000892619	yes
C33A12.7	C33A12.7	WBGene00007886	chrIV	chrIV:9506915-9508760	1.97151	97.9804	5.63512	0.000162451	yes
C33D9.6	C33D9.6	WBGene00007900	chrIV	chrIV:8775419-8778132	0.705029	8.22554	3.54436	0.0492121	yes
C33D9.8	C33D9.8	WBGene00007901	chrIV	chrIV:8783363-8786637	0.0445402	16.8554	8.56388	0.0109443	yes
C33G3.6	C33G3.6	WBGene00007906	chrX	chrX:14080320-14084256	0.0167338	9.74328	9.1855	0.0114781	yes
C34B2.10	C34B2.10	WBGene00016395	chrI	chrI:10682459-10683139	99.2046	18.3	-2.43856	0.0135747	yes
C34D4.10	C34D4.10	WBGene00016402	chrIV	chrIV:7119992-7121401	22.3862	3.96684	-2.49655	0.0419164	yes
C34F6.7	C34F6.7	WBGene00007941	chrX	chrX:11210050-11215405	0.910796	12.998	3.83502	0.0112918	yes
C34F6.8	C34F6.8	WBGene00007942	chrX	chrX:11215630-11222582	0.65977	43.9417	6.05748	0.00139567	yes
C35C5.3	C35C5.3	WBGene00007955	chrX	chrX:11545049-11547497	0.197948	31.4363	7.31117	0.0252605	yes
C35C5.6	C35C5.6	WBGene00007956	chrX	chrX:11563921-11569624	0.019203	11.5243	9.22913	0.000772424	yes
C35E7.8	C35E7.8	WBGene00016460	chrI	chrI:10808595-10810373	121.432	14.2606	-3.09005	8.3e-05	yes
C36A4.11	C36A4.11	WBGene00044167	chrIII	chrIII:3840576-3841067	52.5024	5.35994	-3.2921	0.0213166	yes
C36B7.6	C36B7.6	WBGene00016469	chrX	chrX:7097419-7100297	0.798051	17.1642	4.42678	0.00174251	yes
C36E6.1	C36E6.1	WBGene00016489	chrX	chrX:17434371-17438007	12.7125	324.719	4.67488	9.81e-08	yes
C37A5.7	C37A5.7	WBGene00007991	chrI	chrI:14163434-14168285	44.3019	10.3084	-2.10354	0.0145056	yes
C37H5.13	C37H5.13	WBGene00016511	chrV	chrV:4855310-4862951	0.494698	48.5673	6.61729	0.012256	yes
C37H5.2	C37H5.2	WBGene00016506	chrV	chrV:4847725-4849622	1.08901	48.5728	5.47906	0.000577476	yes
C37H5.3	C37H5.3	WBGene00016507	chrV	chrV:4844670-4846939	1.54098	76.2863	5.6295	0.00591434	yes
C41D11.6	C41D11.6	WBGene00016565	chrI	chrI:4460146-4462705	12.0676	0.290272	-5.37758	0.000508706	yes
C41H7.4	C41H7.4	WBGene00016574	chrII	chrII:3003984-3005527	1.2067	20.0787	4.05653	0.0217632	yes
C41H7.6	C41H7.6	WBGene00016576	chrII	chrII:3000827-3002414	1.58838	14.7234	3.21249	0.0474448	yes
C42C1.13	C42C1.13	WBGene00016591	chrIV	chrIV:12278744-12279524	708.271	194.879	-1.86172	0.014001	yes
C43E11.5	C43E11.5	WBGene00016605	chrI	chrI:4237034-4238607	0.0111072	6.47864	9.18806	0.0238546	yes
C43H6.4	C43H6.4	WBGene00016617	chrX	chrX:2404016-2407353	0	8.55264	1.79769e+308	0.0140192	yes
C43H6.7	C43H6.7	WBGene00016620	chrX	chrX:2398804-2402044	1.18671	36.392	4.93859	0.00160681	yes
C43H8.2	C43H8.2	WBGene00016622	chrI	chrI:10622940-10624350	353.157	70.7205	-2.32011	0.000184579	yes
C44B7.12	C44B7.12	WBGene00016632	chrII	chrII:6891669-6893591	44.2691	8.43436	-2.39195	0.00783929	yes
C44B9.2	C44B9.2	WBGene00008079	chrIII	chrIII:10875359-10877915	65.1296	5.89688	-3.46529	0.000271512	yes
C44B9.3	C44B9.3	WBGene00008080	chrIII	chrIII:10878282-10879996	75.7614	8.5941	-3.14004	0.00101179	yes
C44C1.2	C44C1.2	WBGene00016642	chrX	chrX:957882-960558	0.044146	30.9215	9.45211	0.000121726	yes
C44E4.2	C44E4.2	WBGene00016651	chrI	chrI:4631391-4633348	72.3579	8.879	-3.02668	0.000692128	yes
C44E4.7	C44E4.7	WBGene00016656	chrI	chrI:4623460-4629468	34.6861	10.6708	-1.70069	0.025267	yes
C44H9.4	C44H9.4	WBGene00008099	chrV	chrV:12835690-12839766	0.0166653	5.06282	8.24695	0.017917	yes
C45B2.6	C45B2.6	WBGene00016661	chrX	chrX:6053064-6057307	8.58656	39.6043	2.2055	0.00433749	yes
C45G3.5	C45G3.5	WBGene00044008	chrI	chrI:9228155-9233550	295.859	106.537	-1.47355	0.0364355	yes
C45G9.2	C45G9.2	WBGene00016674	chrIII	chrIII:5069030-5070380	220.944	51.2431	-2.10825	0.00221816	yes
C46A5.6	C46A5.6	WBGene00016702	chrIV	chrIV:7760117-7763830	520.18	136.558	-1.9295	0.00281823	yes
C46C11.4	C46C11.4	WBGene00044567	chrX	chrX:4644376-4646369	0.0757212	10.9355	7.17411	0.0158637	yes
C46C2.2	C46C2.2	WBGene00008110	chrIV	chrIV:9216935-9220157	0.44282	14.0416	4.98685	0.0099952	yes
C47E12.2	C47E12.2	WBGene00008147	chrIV	chrIV:10001949-10003513	491.966	180.902	-1.44335	0.0312843	yes
C48B4.7	C48B4.7	WBGene00008170	chrIII	chrIII:9558650-9559342	211.927	64.1932	-1.72308	0.0335922	yes
C48B4.8	C48B4.8	WBGene00008171	chrIII	chrIII:9559819-9561151	85.2914	21.9539	-1.95792	0.0379142	yes
C49C3.8	C49C3.8	WBGene00008198	chrIV	chrIV:17335232-17336644	1.02629	22.7743	4.47189	0.0169563	yes
C49F5.6	C49F5.6	WBGene00008210	chrX	chrX:11988245-11991199	0.632065	94.4012	7.22259	1.65e-08	yes
C49G7.1	C49G7.1	WBGene00016780	chrV	chrV:4056149-4059051	0	7.12351	1.79769e+308	0.0295771	yes
C49G7.10	C49G7.10	WBGene00016788	chrV	chrV:4040393-4041989	1.92936	42.938	4.47606	0.0035585	yes
C49G7.12	C49G7.12	WBGene00077593	chrV	chrV:4038805-4039919	0	18.3377	1.79769e+308	0.0286941	yes
C49G7.5	C49G7.5	WBGene00016783	chrV	chrV:4042388-4043580	0	23.6526	1.79769e+308	0.0159258	yes
C50A2.2	C50A2.2	WBGene00016796	chrIV	chrIV:1170705-1176675	23.899	4.82212	-2.30921	0.0229352	yes
C50C3.1	C50C3.1	WBGene00016799	chrIII	chrIII:8191747-8193776	114.014	21.5983	-2.40023	0.000827175	yes
C50D2.7	C50D2.7	WBGene00016810	chrII	chrII:92180-95280	30.0039	4.45874	-2.75044	0.00336927	yes
C52B9.4	C52B9.4	WBGene00016867	chrX	chrX:4260627-4264528	0.0397876	27.3087	9.42283	0.000692128	yes
C52E12.6	C52E12.6	WBGene00016890	chrII	chrII:7022884-7024888	23.5396	2.13767	-3.46098	0.00970732	yes
C53A3.2	C53A3.2	WBGene00016892	chrV	chrV:5762520-5763829	1.20369	23.0239	4.25759	0.0100485	yes
C53A5.5	C53A5.5	WBGene00008265	chrV	chrV:14539907-14542878	0.021978	6.58648	8.2273	0.0289596	yes
C53A5.9	C53A5.9	WBGene00008267	chrV	chrV:14557022-14558903	0	17.2178	1.79769e+308	0.0113023	yes
C53D6.6	C53D6.6	WBGene00008283	chrIV	chrIV:9027675-9032636	1.02651	74.5834	6.18304	6.68e-06	yes
C53H9.3	C53H9.3	WBGene00044746	chrI	chrI:1832116-1832423	114.43	14.3464	-2.9957	0.0411261	yes
C54D10.3	C54D10.3	WBGene00008298	chrV	chrV:12418570-12419397	0.0847558	20.5106	7.91884	0.0342913	yes
C54D10.8	C54D10.8	WBGene00008302	chrV	chrV:12445164-12446647	2.16121	121.627	5.81448	9.88e-06	yes
C54G7.2	C54G7.2	WBGene00016934	chrX	chrX:5519840-5522791	0.328006	11.6457	5.14992	0.0177452	yes
C55B7.11	C55B7.11	WBGene00016947	chrI	chrI:6503361-6513843	343.435	83.6825	-2.03704	0.00122151	yes
C55C3.3	C55C3.3	WBGene00016953	chrIV	chrIV:5685281-5688249	3.17609	116.876	5.20158	1.43e-08	yes
C55C3.6	C55C3.6	WBGene00016956	chrIV	chrIV:5683203-5684661	7.92653	73.6575	3.21607	0.0019209	yes
C56C10.10	C56C10.10	WBGene00016966	chrII	chrII:6592469-6594218	43.0455	7.57876	-2.50583	0.0121249	yes
C56C10.12	C56C10.12	WBGene00016968	chrII	chrII:6603408-6609324	0.612316	6.42711	3.39182	0.00589399	yes
C56G2.3	C56G2.3	WBGene00016978	chrIII	chrIII:6346923-6348004	14.7673	1.40159	-3.39726	0.0341636	yes
D1005.1	D1005.1	WBGene00016995	chrX	chrX:1479536-1484393	0.119399	25.8102	7.75601	2.16e-05	yes
D1007.10	D1007.10	WBGene00017007	chrI	chrI:4586273-4589392	213.891	52.4877	-2.02682	0.0194584	yes
D1022.4	D1022.4	WBGene00017023	chrII	chrII:7456198-7457287	1.9705	22.901	3.53878	0.0245783	yes
D1025.1	D1025.1	WBGene00008353	chrX	chrX:14520692-14522579	0.534551	22.3023	5.38272	0.0145056	yes
D2023.5	D2023.5	WBGene00008409	chrV	chrV:11825884-11827048	116.789	37.9125	-1.62317	0.0374972	yes
D2030.4	D2030.4	WBGene00008414	chrI	chrI:7580941-7581626	236.12	73.3478	-1.68669	0.0423497	yes
D2030.7	D2030.7	WBGene00008417	chrI	chrI:7588648-7590563	1046.83	326.998	-1.67867	0.00889869	yes
D2085.6	D2085.6	WBGene00008431	chrII	chrII:8659731-8661662	329.92	92.0771	-1.8412	0.00372592	yes
D2096.5	D2096.5	WBGene00017072	chrIV	chrIV:8359151-8359703	11.7124	84.3726	2.84873	0.0436189	yes
DH11.2	DH11.2	WBGene00008436	chrII	chrII:8012764-8015203	0.503015	8.96301	4.15531	0.0401011	yes
F54F2.9	F54F2.9	WBGene00018836	chrIII	chrIII:8827329-8829206	194.655	18.123	-3.42502	1.01e-05	yes
E01G4.5	E01G4.5	WBGene00008447	chrII	chrII:13472360-13473853	0.345319	37.7447	6.7722	0.00111594	yes
EEED8.13	EEED8.13	WBGene00017141	chrII	chrII:5411617-5412151	158.768	32.1211	-2.30533	0.0136952	yes
EEED8.14	EEED8.14	WBGene00017142	chrII	chrII:5412204-5413997	254.152	62.3558	-2.02709	0.00239943	yes
EEED8.15	EEED8.15	WBGene00017143	chrII	chrII:5419230-5421084	1.4964	18.0003	3.58846	0.0156043	yes
EEED8.2	EEED8.2	WBGene00017133	chrII	chrII:5416696-5418342	0.0613416	34.2297	9.12417	0.00935955	yes
EEED8.3	EEED8.3	WBGene00017134	chrII	chrII:5414271-5415350	454.057	105.136	-2.11062	0.000974766	yes
F01G10.7	F01G10.7	WBGene00008510	chrIV	chrIV:10239255-10241837	0.048251	39.6292	9.68179	0.00384415	yes
F02C12.1	F02C12.1	WBGene00008515	chrX	chrX:13402023-13406343	0.0139289	2.97138	7.7369	0.0440305	yes
F02E9.7	F02E9.7	WBGene00008531	chrI	chrI:8413253-8416123	98.4052	7.83158	-3.65136	5.1e-06	yes
F07F6.4	F07F6.4	WBGene00017217	chrII	chrII:5427431-5429557	26.0751	3.97165	-2.71486	0.00781089	yes
F07F6.7	F07F6.7	WBGene00017219	chrII	chrII:5422825-5423814	95.3831	13.0193	-2.87308	0.00146311	yes
F08G12.2	F08G12.2	WBGene00008586	chrX	chrX:11298016-11299623	4.52188	191.63	5.40525	1.06e-09	yes
F09A5.4	F09A5.4	WBGene00008601	chrX	chrX:13152753-13170006	1.96188	35.6256	4.18261	0.0325408	yes
F09C8.2	F09C8.2	WBGene00008622	chrX	chrX:16140441-16146952	1.006	25.6552	4.67255	9.88e-06	yes
F10D11.6	F10D11.6	WBGene00008652	chrI	chrI:8445442-8450988	0.00422012	1.63509	8.59787	0.0389408	yes
F10E9.5	F10E9.5	WBGene00017357	chrIII	chrIII:8307520-8308366	697.559	179.734	-1.95645	0.00235052	yes
F10E9.7	F10E9.7	WBGene00017358	chrIII	chrIII:8279036-8306284	480.135	110.861	-2.11468	0.00533866	yes
F10G7.5	F10G7.5	WBGene00017369	chrII	chrII:4693441-4696405	5.01695	54.7861	3.44893	0.000329303	yes
F11C1.7	F11C1.7	WBGene00045495	chrX	chrX:12989423-12990284	2.47553	86.3764	5.12483	0.0106783	yes
F11C3.1	F11C3.1	WBGene00008695	chrI	chrI:14867825-14871354	0.283663	9.46057	5.05968	0.0212828	yes
F11D5.1	F11D5.1	WBGene00017380	chrX	chrX:3333116-3347239	0.170371	51.8421	8.2493	0.00590456	yes
F13B9.1	F13B9.1	WBGene00017419	chrX	chrX:8287208-8294448	5.70099	60.9892	3.41927	5.63e-05	yes
F13C5.2	F13C5.2	WBGene00017423	chrX	chrX:593959-596289	0.493392	11.1461	4.49767	0.0389408	yes
F13H8.8	F13H8.8	WBGene00017441	chrII	chrII:6265618-6267592	2.50459	20.7566	3.05092	0.0128128	yes
F14B4.1	F14B4.1	WBGene00008779	chrI	chrI:9265946-9270912	3.22394	15.8405	2.29672	0.0283153	yes
F14B8.2	F14B8.2	WBGene00017445	chrX	chrX:6904733-6904983	1.51845	203.41	7.06565	0.0196915	yes
F14D2.11	F14D2.11	WBGene00017459	chrII	chrII:3341381-3342074	122.06	19.4253	-2.65158	0.00521241	yes
F14D2.14	F14D2.14	WBGene00017462	chrII	chrII:3346822-3347518	304.27	72.1499	-2.07628	0.00680493	yes
F14D2.15	F14D2.15	WBGene00023427	chrII	chrII:3342395-3343540	229.538	71.8961	-1.67475	0.0190171	yes
F14D2.8	F14D2.8	WBGene00017456	chrII	chrII:3347576-3349873	66.9266	11.1629	-2.58387	0.0018443	yes
F14D7.6	F14D7.6	WBGene00008793	chrV	chrV:14301405-14306410	0.0491991	28.496	9.17791	0.000830737	yes
F15D4.2	F15D4.2	WBGene00008859	chrII	chrII:13216019-13216685	169.759	54.236	-1.64617	0.0481577	yes
F16A11.1	F16A11.1	WBGene00008876	chrI	chrI:9393945-9404017	41.3278	12.4153	-1.735	0.0288314	yes
F16B12.6	F16B12.6	WBGene00008882	chrX	chrX:14102289-14107836	2.35993	38.4782	4.02723	1.84e-07	yes
F17C11.11	F17C11.11	WBGene00008922	chrV	chrV:10937613-10938821	1.35911	29.9217	4.46046	0.0148332	yes
F18A12.7	F18A12.7	WBGene00017556	chrII	chrII:3411427-3414472	0	10.3636	1.79769e+308	0.0140043	yes
F19B10.10	F19B10.10	WBGene00017589	chrII	chrII:3677537-3681418	0.00611339	2.4859	8.66758	0.0345899	yes
F19B10.2	F19B10.2	WBGene00017584	chrII	chrII:3675626-3676731	0.587611	30.3395	5.69019	0.00615257	yes
F19F10.1	F19F10.1	WBGene00017598	chrV	chrV:7562694-7564226	0.0386943	26.1487	9.40041	0.012839	yes
F20A1.9	F20A1.9	WBGene00017620	chrV	chrV:7049416-7051273	814.435	206.446	-1.98003	0.00121901	yes
F20D1.1	F20D1.1	WBGene00008973	chrX	chrX:14968833-14970203	15.1291	139.342	3.20324	0.000152385	yes
F20D1.3	F20D1.3	WBGene00008975	chrX	chrX:14976046-14978642	6.43789	84.8363	3.72002	5.01e-06	yes
F20D1.9	F20D1.9	WBGene00008979	chrX	chrX:15002025-15003762	0.668246	16.6853	4.64205	0.0191385	yes
F20H11.4	F20H11.4	WBGene00017647	chrIII	chrIII:6608569-6610278	2.54088	16.6472	2.71188	0.0428137	yes
F21A10.2	F21A10.2	WBGene00008999	chrX	chrX:10181750-10194317	0.750062	43.0869	5.8441	7.53e-07	yes
F21F3.2	F21F3.2	WBGene00017672	chrI	chrI:4903437-4905139	0.00875325	28.3009	11.6587	0.0020481	yes
F21F3.3	F21F3.3	WBGene00017673	chrI	chrI:4901974-4903137	113.683	5511.25	5.59929	0	yes
F21F3.4	F21F3.4	WBGene00017674	chrI	chrI:4896003-4897542	996.725	110.308	-3.17566	2.9e-08	yes
F21G4.4	F21G4.4	WBGene00009025	chrX	chrX:9897254-9899418	0	8.9167	1.79769e+308	0.0415736	yes
F21G4.6	F21G4.6	WBGene00009027	chrX	chrX:9908755-9917386	0.00902766	2.63962	8.19176	0.0190258	yes
F22B5.4	F22B5.4	WBGene00009042	chrII	chrII:8449649-8452628	0	24.4305	1.79769e+308	0.0390471	yes
F22B7.9	F22B7.9	WBGene00017698	chrIII	chrIII:8652494-8653826	0.47216	11.8428	4.64858	0.0474235	yes
F22B8.7	F22B8.7	WBGene00009049	chrV	chrV:16095203-16097294	0.0269376	24.9287	9.85397	0.00747911	yes
F22D6.8	F22D6.8	WBGene00043279	chrI	chrI:7099005-7099403	247.282	37.3841	-2.72566	0.0168751	yes
F22D6.9	F22D6.9	WBGene00009054	chrI	chrI:7099829-7101760	867.552	342.842	-1.33941	0.0446288	yes
F23B2.10	F23B2.10	WBGene00009077	chrIV	chrIV:9152804-9154306	1.86741	95.6064	5.67799	8.21e-06	yes
F23B2.7	F23B2.7	WBGene00009075	chrIV	chrIV:9150476-9152029	12.6327	75.1668	2.57293	0.0335443	yes
F23C8.6	F23C8.6	WBGene00017735	chrI	chrI:2420832-2421744	132.382	31.6511	-2.06438	0.0107553	yes
F23D12.10	F23D12.10	WBGene00045291	chrX	chrX:14413640-14415586	0.0535016	11.2332	7.71397	0.0223233	yes
F23H11.4	F23H11.4	WBGene00017760	chrIII	chrIII:902200-907528	4.68547	26.9304	2.52297	0.00307202	yes
F23H11.5	F23H11.5	WBGene00000263	chrIII	chrIII:910005-910573	366.954	86.1542	-2.09061	0.0111271	yes
F25B4.2	F25B4.2	WBGene00017766	chrV	chrV:5709401-5712311	0.0481118	3.71969	6.27265	0.0242932	yes
F25B4.5	F25B4.5	WBGene00017768	chrV	chrV:5678583-5682617	45.8224	124.754	1.44496	0.039858	yes
F25E5.1	F25E5.1	WBGene00017782	chrV	chrV:7465877-7471174	0.417114	10.3645	4.63507	0.00174251	yes
F25H2.2	F25H2.2	WBGene00009116	chrI	chrI:10543012-10546414	0.309432	15.2856	5.6264	0.00269907	yes
F25H9.2	F25H9.2	WBGene00009135	chrV	chrV:13458129-13459425	0.665516	30.5938	5.52262	0.0027955	yes
F25H9.7	F25H9.7	WBGene00009139	chrV	chrV:13468402-13469070	605.21	161.84	-1.90287	0.00589399	yes
F26A1.1	F26A1.1	WBGene00017801	chrIII	chrIII:4850471-4851861	137.94	39.97	-1.78705	0.0188633	yes
F26A1.13	F26A1.13	WBGene00017811	chrIII	chrIII:4847035-4848931	39.5378	9.41473	-2.07024	0.0298324	yes
F26A1.14	F26A1.14	WBGene00017812	chrIII	chrIII:4849229-4849814	55.138	8.82941	-2.64266	0.0477034	yes
F26E4.3	F26E4.3	WBGene00009158	chrI	chrI:9762395-9767860	0.0337344	20.0774	9.21714	0.00749998	yes
F26F2.7	F26F2.7	WBGene00009172	chrV	chrV:20580964-20590290	24.0971	4.81993	-2.32177	0.00956916	yes
F26H11.4	F26H11.4	WBGene00009182	chrII	chrII:14408674-14412118	79.6163	11.5498	-2.7852	5.81e-05	yes
F26H9.5	F26H9.5	WBGene00009177	chrI	chrI:9312635-9314480	263.204	31.8913	-3.04495	2.65e-06	yes
F28B3.10	F28B3.10	WBGene00017889	chrI	chrI:4949341-4950413	161.771	41.7073	-1.95558	0.0168319	yes
F28C1.3	F28C1.3	WBGene00009201	chrV	chrV:12468663-12472691	0.377252	10.5085	4.79989	0.0387804	yes
F28C10.3	F28C10.3	WBGene00017898	chrX	chrX:531885-535750	0.164886	11.3708	6.10772	0.0119522	yes
F28F8.9	F28F8.9	WBGene00044188	chrV	chrV:15577633-15578377	174.489	17.8938	-3.2856	0.000474905	yes
F28H6.4	F28H6.4	WBGene00009233	chrX	chrX:14127811-14133417	1.19437	27.8323	4.54244	8.64e-06	yes
F28H6.6	F28H6.6	WBGene00009234	chrX	chrX:14117018-14125805	0.0260068	3.47336	7.0613	0.00812253	yes
F28H7.8	F28H7.8	WBGene00009241	chrV	chrV:10758939-10760549	0.271264	30.6915	6.822	0.00110633	yes
F29G9.7	F29G9.7	WBGene00017933	chrV	chrV:6035379-6036544	0.0887419	71.5231	9.65458	0.000474905	yes
F31C3.2	F31C3.2	WBGene00009284	chrI	chrI:15036361-15041270	194.375	52.2945	-1.89411	0.0168751	yes
F31E9.6	F31E9.6	WBGene00009299	chrV	chrV:17313600-17315100	0.715302	18.8175	4.71738	0.0317294	yes
F32B5.7	F32B5.7	WBGene00017980	chrI	chrI:2672951-2682799	0.00418434	1.55922	8.54161	0.0411345	yes
F32B6.3	F32B6.3	WBGene00009320	chrIV	chrIV:9879306-9884260	134.191	44.6078	-1.58892	0.037218	yes
F32D1.2	F32D1.2	WBGene00017982	chrV	chrV:4346079-4346411	349.297	58.1796	-2.58587	0.0130473	yes
F32D1.5	F32D1.5	WBGene00017984	chrV	chrV:4369336-4371351	75.0462	345.044	2.20093	0.000523395	yes
F33D4.4	F33D4.4	WBGene00017996	chrIV	chrIV:7703876-7706893	104.19	279.874	1.42556	0.0351873	yes
F33E11.3	F33E11.3	WBGene00018011	chrV	chrV:300027-304714	8.37796	42.4209	2.3401	0.00307202	yes
F33H2.3	F33H2.3	WBGene00009367	chrI	chrI:15034505-15035456	5.07165	42.9649	3.08263	0.00764206	yes
F33H2.8	F33H2.8	WBGene00009371	chrI	chrI:15031137-15033028	1.09182	54.9703	5.65384	0.0156043	yes
F35D11.3	F35D11.3	WBGene00018044	chrII	chrII:4608366-4612048	0.393356	8.85752	4.493	0.0375023	yes
F35H12.4	F35H12.4	WBGene00018076	chrX	chrX:920251-924507	0.022835	4.72034	7.6915	0.0375244	yes
F36D3.1	F36D3.1	WBGene00009469	chrV	chrV:16499330-16502847	3.27937	32.9229	3.3276	0.00220714	yes
F36F12.8	F36F12.8	WBGene00018099	chrV	chrV:2090679-2091614	49.9249	4.07151	-3.61613	0.00404121	yes
F36H12.2	F36H12.2	WBGene00018118	chrIV	chrIV:5249384-5308853	85.4517	11.9336	-2.84008	0.00129116	yes
F36H2.2	F36H2.2	WBGene00009499	chrI	chrI:9246020-9249376	426.433	116.37	-1.8736	0.00306847	yes
F37B4.10	F37B4.10	WBGene00018140	chrV	chrV:2875800-2877633	1.15779	66.3766	5.84122	0.000441459	yes
F37F2.2	F37F2.2	WBGene00018159	chrI	chrI:1441667-1443944	79.0023	11.4639	-2.7848	0.0191243	yes
F38A1.8	F38A1.8	WBGene00009521	chrIV	chrIV:1232900-1239823	10.1112	2.00976	-2.33085	0.0415736	yes
F38B7.3	F38B7.3	WBGene00009534	chrV	chrV:11549282-11551529	2.6538	72.5691	4.77322	1.09e-05	yes
F38E9.5	F38E9.5	WBGene00018187	chrX	chrX:16446124-16451262	0.658956	146.419	7.7957	2.66e-06	yes
F39B1.1	F39B1.1	WBGene00009552	chrX	chrX:15234777-15246296	0.0609842	5.12929	6.39418	0.0118764	yes
F39C12.1	F39C12.1	WBGene00018193	chrX	chrX:4834865-4853035	0.502516	21.4952	5.4187	1.7e-11	yes
F39H2.3	F39H2.3	WBGene00009563	chrI	chrI:8664946-8666491	182.145	22.6507	-3.00746	1.51e-05	yes
F40E10.6	F40E10.6	WBGene00009574	chrX	chrX:14703634-14706787	0.0143781	3.66121	7.99231	0.00428688	yes
F40F4.7	F40F4.7	WBGene00018238	chrX	chrX:3243890-3245968	1.98696	49.1485	4.62851	0.000322675	yes
F40F8.1	F40F8.1	WBGene00009575	chrII	chrII:11127586-11129198	200.429	66.3037	-1.59593	0.0254145	yes
F40G9.5	F40G9.5	WBGene00018241	chrIII	chrIII:183343-184905	2.13896	22.3544	3.38558	0.0401743	yes
F40G9.6	F40G9.6	WBGene00018242	chrIII	chrIII:179540-180139	0.0423545	65.0841	10.5856	0.00656201	yes
F40H6.6	F40H6.6	WBGene00044412	chrIII	chrIII:6065469-6066166	250.684	76.1474	-1.719	0.0441268	yes
F41B4.3	F41B4.3	WBGene00018259	chrX	chrX:6835506-6836069	4.06128	118.657	4.86872	0.00366268	yes
F42C5.3	F42C5.3	WBGene00018345	chrIV	chrIV:7286170-7287356	2.20179	61.6667	4.80774	0.00413093	yes
F42C5.9	F42C5.9	WBGene00018349	chrIV	chrIV:7314362-7317152	3.05149	19.1087	2.64664	0.01126	yes
F42F12.3	F42F12.3	WBGene00009635	chrX	chrX:12350519-12351524	0.0190749	31.1616	10.6739	0.00596543	yes
F43C1.1	F43C1.1	WBGene00009647	chrIII	chrIII:4210535-4216679	0.0574321	4.49503	6.29033	0.0289354	yes
F43C1.5	F43C1.5	WBGene00009649	chrIII	chrIII:4229169-4230366	36.4357	2.4614	-3.8878	0.00879243	yes
F43C11.9	F43C11.9	WBGene00018386	chrII	chrII:2337916-2340751	0.0120508	12.2717	9.99199	0.0114781	yes
F43G6.4	F43G6.4	WBGene00009657	chrII	chrII:11790695-11797184	0.0720836	6.1703	6.41953	0.0196915	yes
F43G6.8	F43G6.8	WBGene00009660	chrII	chrII:11812235-11814045	2.76073	31.2209	3.49939	0.0242514	yes
F43G9.3	F43G9.3	WBGene00009666	chrI	chrI:8612722-8615125	31.7092	7.83449	-2.01699	0.0341636	yes
F44D12.1	F44D12.1	WBGene00009678	chrIV	chrIV:10009944-10016377	0.579862	20.5547	5.14761	6.9e-05	yes
F44E2.4	F44E2.4	WBGene00018418	chrIII	chrIII:8832403-8838343	0.00253023	1.13854	8.8137	0.0330931	yes
F44E5.3	F44E5.3	WBGene00009690	chrII	chrII:11762102-11765599	0.00925866	3.37527	8.50998	0.0420576	yes
F44F4.3	F44F4.3	WBGene00009702	chrII	chrII:10884668-10885818	127.143	27.2925	-2.21988	0.00614217	yes
F45C12.15	F45C12.15	WBGene00018446	chrII	chrII:1733725-1736539	5.9663	65.6065	3.45893	2.6e-05	yes
F45F2.11	F45F2.11	WBGene00018483	chrV	chrV:8519324-8520741	169.421	39.9901	-2.0829	0.00302033	yes
F45H10.3	F45H10.3	WBGene00009740	chrII	chrII:13493110-13494532	353.354	89.7628	-1.97692	0.00569432	yes
F46A9.1	F46A9.1	WBGene00009754	chrI	chrI:9457808-9458840	0	22.2666	1.79769e+308	0.0239641	yes
F46F6.2	F46F6.2	WBGene00009793	chrX	chrX:10397182-10406243	0.91628	13.9397	3.92726	0.00056914	yes
F46H5.3	F46H5.3	WBGene00018519	chrX	chrX:7230685-7238618	117.503	1586.51	3.75509	7.21e-07	yes
F46H5.4	F46H5.4	WBGene00018520	chrX	chrX:7245033-7254518	0.554157	17.0632	4.94445	5.44e-06	yes
F47A4.5	F47A4.5	WBGene00009801	chrX	chrX:9833321-9837981	0.423171	10.8558	4.68109	0.0035585	yes
F47B10.1	F47B10.1	WBGene00009812	chrX	chrX:10897612-10900051	2.63244	68.7026	4.70589	1.52e-06	yes
F47B7.2	F47B7.2	WBGene00018533	chrX	chrX:3772746-3778041	2.54205	21.4896	3.07958	0.0335671	yes
F47B8.2	F47B8.2	WBGene00009803	chrV	chrV:14316003-14316609	0	54.0048	1.79769e+308	0.0101564	yes
F47B8.3	F47B8.3	WBGene00009804	chrV	chrV:14321463-14322861	1.14832	99.4951	6.43703	0.000781538	yes
F47G3.3	F47G3.3	WBGene00018578	chrX	chrX:2375989-2378645	2.23481	28.2284	3.65892	0.00844437	yes
F47G4.2	F47G4.2	WBGene00009823	chrI	chrI:14075823-14082369	0.465746	25.766	5.78978	0.00281823	yes
F47G4.4	F47G4.4	WBGene00009825	chrI	chrI:14062736-14068797	0.0136822	3.75885	8.10184	0.0322946	yes
F47G6.2	F47G6.2	WBGene00018579	chrI	chrI:1471298-1479922	1.02392	13.5194	3.72286	0.0128501	yes
F47G9.4	F47G9.4	WBGene00009831	chrV	chrV:11317209-11321740	1.09763	10.0743	3.19822	0.0144747	yes
F48E3.3	F48E3.3	WBGene00018604	chrX	chrX:7495638-7500931	5.4197	52.481	3.27551	6.5e-07	yes
F49E7.2	F49E7.2	WBGene00018634	chrX	chrX:1095543-1097010	3.05538	69.4163	4.50585	0.00117564	yes
F49F1.8	F49F1.8	WBGene00018648	chrIV	chrIV:4130495-4134624	9.01333	1.03937	-3.11634	0.0282424	yes
F52B11.2	F52B11.2	WBGene00009925	chrIV	chrIV:14083778-14084516	232.448	53.385	-2.1224	0.00428688	yes
F52B5.7	F52B5.7	WBGene00009923	chrI	chrI:8313220-8315337	0.836775	28.0546	5.06725	0.00603591	yes
F52C12.2	F52C12.2	WBGene00018679	chrIV	chrIV:1953578-1959725	158.042	40.2449	-1.97343	0.00289536	yes
F52C6.14	F52C6.14	WBGene00018671	chrII	chrII:1931149-1934512	20.4106	1.86445	-3.4525	0.00121901	yes
F52C6.2	F52C6.2	WBGene00018659	chrII	chrII:1926474-1927253	128.654	34.19	-1.91185	0.0262496	yes
F52C6.3	F52C6.3	WBGene00018660	chrII	chrII:1924771-1925701	80.1737	13.1566	-2.60734	0.00438838	yes
F52C6.4	F52C6.4	WBGene00018661	chrII	chrII:1922870-1924262	24.9151	3.93601	-2.66221	0.0379095	yes
F52D10.2	F52D10.2	WBGene00009930	chrX	chrX:11589652-11591652	0.644222	11.9574	4.21421	0.0257529	yes
F52D2.6	F52D2.6	WBGene00018688	chrX	chrX:1974906-1980931	0	13.6865	1.79769e+308	0.00269907	yes
F52D2.7	F52D2.7	WBGene00018689	chrX	chrX:1962566-1966164	0.0580123	20.4354	8.4605	0.00869544	yes
F52E4.5	F52E4.5	WBGene00018702	chrX	chrX:3085884-3087329	0	14.5742	1.79769e+308	0.0197004	yes
F52G3.1	F52G3.1	WBGene00018710	chrX	chrX:16963795-16972739	1.2348	57.306	5.53633	8.32e-10	yes
F52H2.7	F52H2.7	WBGene00018719	chrX	chrX:2566549-2572646	0.00882733	3.03588	8.42592	0.00221182	yes
F52H3.4	F52H3.4	WBGene00009946	chrII	chrII:10041074-10042430	26.8172	4.58186	-2.54916	0.0193247	yes
F53F4.12	F53F4.12	WBGene00009994	chrV	chrV:13626034-13627398	62.6552	18.7432	-1.74107	0.0463639	yes
F53H4.6	F53H4.6	WBGene00010011	chrX	chrX:15852865-15860532	0.0355622	6.26816	7.46156	0.0422356	yes
F54B11.5	F54B11.5	WBGene00010028	chrX	chrX:13594061-13595997	3.06476	40.0093	3.70649	0.00223854	yes
F54B3.3	F54B3.3	WBGene00010015	chrII	chrII:10248929-10251106	138.341	32.0357	-2.11048	0.00124221	yes
F54D5.5	F54D5.5	WBGene00010051	chrII	chrII:11564378-11566954	0	21.8056	1.79769e+308	0.0289784	yes
F54G2.1	F54G2.1	WBGene00018837	chrX	chrX:2621265-2664365	0.0425981	2.23323	5.7122	0.0372875	yes
F54H12.5	F54H12.5	WBGene00018845	chrIII	chrIII:7970197-7972037	2.96021	27.0001	3.18919	0.01126	yes
F55A11.8	F55A11.8	WBGene00010081	chrV	chrV:11788136-11789095	121.415	33.3697	-1.86334	0.0237161	yes
F55A12.1	F55A12.1	WBGene00018862	chrI	chrI:5368480-5372474	114.291	28.4839	-2.00449	0.0020481	yes
F55A12.10	F55A12.10	WBGene00018867	chrI	chrI:5367012-5367832	181.355	60.2048	-1.59086	0.0474235	yes
F55A3.7	F55A3.7	WBGene00018852	chrI	chrI:10785116-10787852	56.3863	14.9495	-1.91525	0.0191243	yes
F55B12.10	F55B12.10	WBGene00077439	chrV	chrV:13839754-13840267	0.330333	247.126	9.54711	0.0112918	yes
F55C12.5	F55C12.5	WBGene00018872	chrII	chrII:5867232-5873592	15.9651	63.9962	2.00307	0.00428956	yes
F55C5.10	F55C5.10	WBGene00010098	chrV	chrV:12282867-12283980	0	29.0824	1.79769e+308	0.0461919	yes
F55F8.9	F55F8.9	WBGene00018897	chrI	chrI:5669970-5673355	21.6549	5.00898	-2.11211	0.0275986	yes
F55G1.6	F55G1.6	WBGene00018902	chrIV	chrIV:7473505-7474942	600.57	151.366	-1.98829	0.0013684	yes
F56C11.5	F56C11.5	WBGene00018957	chrI	chrI:178537-182771	114.396	12.5043	-3.19354	0.0120619	yes
F56D2.5	F56D2.5	WBGene00018966	chrIII	chrIII:5578395-5581179	2.59018	44.2787	4.09549	0.000117367	yes
F56E10.1	F56E10.1	WBGene00018975	chrV	chrV:104829-105964	77.1126	19.8644	-1.95678	0.0190258	yes
F56F10.4	F56F10.4	WBGene00018987	chrX	chrX:864739-871078	0.0105088	22.1326	11.0404	0.00140903	yes
F56H1.7	F56H1.7	WBGene00045483	chrI	chrI:5760899-5762438	767.18	49.0767	-3.96645	4.28e-10	yes
F57B10.5	F57B10.5	WBGene00019003	chrI	chrI:6562699-6563652	26.9591	138.874	2.36494	0.00418557	yes
F57C7.1	F57C7.1	WBGene00010199	chrX	chrX:10569210-10575656	0.762272	24.7417	5.02049	4.95e-05	yes
F57C9.7	F57C9.7	WBGene00019013	chrI	chrI:4825169-4826634	95.3139	29.558	-1.68914	0.0294211	yes
F57G12.1	F57G12.1	WBGene00010221	chrX	chrX:12169030-12171615	0.0213342	8.3115	8.6058	0.0018329	yes
F58A4.2	F58A4.2	WBGene00010227	chrIII	chrIII:9598390-9600661	181.24	42.9555	-2.07699	0.0135118	yes
F58A4.6	F58A4.6	WBGene00010229	chrIII	chrIII:9614406-9615044	263.892	80.995	-1.70404	0.0351656	yes
F58E2.4	F58E2.4	WBGene00019048	chrIV	chrIV:3463931-3466273	0.0116239	20.1509	10.7595	0.00314604	yes
F58G11.3	F58G11.3	WBGene00010281	chrV	chrV:13669357-13671936	178.22	61.477	-1.53554	0.0211842	yes
F59A2.5	F59A2.5	WBGene00010305	chrIII	chrIII:3404865-3405398	175.935	27.9571	-2.65376	0.0123944	yes
F59A3.6	F59A3.6	WBGene00019079	chrI	chrI:5509409-5511692	90.1928	20.3501	-2.14798	0.00515987	yes
F59B2.8	F59B2.8	WBGene00010310	chrIII	chrIII:9007896-9010044	0	37.3993	1.79769e+308	0.00459571	yes
F59C12.3	F59C12.3	WBGene00019102	chrX	chrX:16603312-16609451	0.0399961	5.5688	7.12137	0.0185197	yes
C56E6.2	C56E6.2	WBGene00016970	chrII	chrII:6524894-6526301	0.598076	15.5719	4.70247	0.0168751	yes
H02I12.5	H02I12.5	WBGene00010353	chrIV	chrIV:11401925-11403315	45.4742	8.86266	-2.35924	0.0099952	yes
H12I13.1	H12I13.1	WBGene00019190	chrII	chrII:6062230-6064312	0.103967	5.81676	5.80602	0.0406759	yes
H13N06.4	H13N06.4	WBGene00010397	chrX	chrX:15497486-15504827	0	10.0099	1.79769e+308	0.0217933	yes
H14E04.3	H14E04.3	WBGene00019200	chrIII	chrIII:2384936-2386569	49.2722	7.98143	-2.62605	0.0341636	yes
H21P03.2	H21P03.2	WBGene00010409	chrIV	chrIV:11480830-11482391	229.51	75.6602	-1.60095	0.0190171	yes
H25P19.1	H25P19.1	WBGene00019244	chrV	chrV:687715-690000	17.5865	1.15346	-3.93043	0.00853257	yes
H28G03.1	H28G03.1	WBGene00019249	chrX	chrX:5216326-5219052	0.179675	20.2777	6.81836	0.00177909	yes
H28G03.2	H28G03.2	WBGene00019250	chrX	chrX:5205739-5216202	0.109912	34.9724	8.31372	0.00298794	yes
H40L08.1	H40L08.1	WBGene00010433	chrX	chrX:15080711-15084016	9.63572	226.822	4.55703	3.62e-11	yes
H43I07.1	H43I07.1	WBGene00019274	chrV	chrV:4204775-4208352	98.7705	25.2172	-1.96967	0.0208222	yes
K01D12.6	K01D12.6	WBGene00010465	chrV	chrV:12398739-12400838	280.42	88.3591	-1.66614	0.0100503	yes
K02A11.3	K02A11.3	WBGene00010488	chrI	chrI:9746028-9747907	0.181286	23.4983	7.01815	0.0248198	yes
K02A6.3	K02A6.3	WBGene00019294	chrX	chrX:8228020-8231880	1.36622	174.312	6.99534	0.000561678	yes
K02F2.2	K02F2.2	WBGene00019322	chrI	chrI:6836388-6838138	92.3968	397.991	2.10682	0.000653339	yes
K03A11.1	K03A11.1	WBGene00010519	chrX	chrX:13051726-13055267	0.00505759	2.08978	8.69068	0.0360583	yes
K03H1.7	K03H1.7	WBGene00010542	chrIII	chrIII:9947321-9950191	127.509	18.1267	-2.81442	0.0047679	yes
K04F10.3	K04F10.3	WBGene00019396	chrI	chrI:6358603-6360459	22.1441	362.992	4.03494	5.48e-06	yes
K04G2.11	K04G2.11	WBGene00010569	chrI	chrI:8039908-8040521	163.157	30.2412	-2.43167	0.0105287	yes
K04G2.6	K04G2.6	WBGene00010565	chrI	chrI:8040791-8043267	3.76468	16.3616	2.11971	0.0460571	yes
K05F1.6	K05F1.6	WBGene00019408	chrII	chrII:5782927-5787635	0.0267416	24.0044	9.81	0.00410209	yes
K06A5.2	K06A5.2	WBGene00019430	chrI	chrI:6468130-6469386	0.0135457	5.6717	8.70981	0.0334526	yes
K07A1.1	K07A1.1	WBGene00010608	chrI	chrI:9582678-9583509	441.692	158.81	-1.47574	0.0341636	yes
K07E3.1	K07E3.1	WBGene00019490	chrX	chrX:8110399-8114697	0.0161581	28.0656	10.7623	0.000653191	yes
K08H10.9	K08H10.9	WBGene00010699	chrV	chrV:9991827-9992768	576.112	196.183	-1.55415	0.0208222	yes
K09A9.4	K09A9.4	WBGene00010702	chrX	chrX:15591299-15595286	0.0100067	21.0368	11.0377	0.00226038	yes
K09D9.12	K09D9.12	WBGene00019569	chrV	chrV:4002311-4005168	0.647653	8.85721	3.77356	0.0434503	yes
K09E3.7	K09E3.7	WBGene00019578	chrX	chrX:17131410-17134418	0.0898948	12.9532	7.17086	0.0101479	yes
K09E9.3	K09E9.3	WBGene00010726	chrX	chrX:15611776-15613723	1.82874	23.409	3.67814	0.0047345	yes
K09F5.6	K09F5.6	WBGene00044698	chrX	chrX:7719220-7725466	0.0121018	3.32077	8.10016	0.00445053	yes
K09H9.7	K09H9.7	WBGene00019598	chrI	chrI:3150410-3151981	1728.95	210.427	-3.03851	1.84e-07	yes
K10D2.5	K10D2.5	WBGene00019631	chrIII	chrIII:5172695-5173297	1195.82	382.569	-1.64421	0.0121911	yes
K11G12.6	K11G12.6	WBGene00019657	chrX	chrX:6725741-6729618	0.605317	39.6977	6.03522	0.0056791	yes
K11H3.4	K11H3.4	WBGene00010781	chrIII	chrIII:9832847-9838224	57.391	11.0234	-2.38025	0.00121901	yes
K12C11.1	K12C11.1	WBGene00019673	chrI	chrI:1340679-1344696	39.0574	6.0826	-2.68284	0.0376152	yes
K12H6.2	K12H6.2	WBGene00019683	chrII	chrII:2812962-2815549	32.406	6.81694	-2.24907	0.0474345	yes
M01A10.3	M01A10.3	WBGene00019693	chrI	chrI:5546229-5561645	86.5777	18.0914	-2.25869	0.00894015	yes
M02B7.5	M02B7.5	WBGene00019726	chrIV	chrIV:3807660-3819318	25.6979	7.4966	-1.77734	0.0432692	yes
M02D8.3	M02D8.3	WBGene00019729	chrX	chrX:8732967-8736954	1.20782	12.8957	3.41642	0.00375424	yes
M02D8.4	M02D8.4	WBGene00019730	chrX	chrX:8748382-8750917	0.423612	69.3456	7.35492	0.0312002	yes
M02E1.1	M02E1.1	WBGene00019733	chrX	chrX:325961-341232	1.12705	14.0405	3.63898	0.000869446	yes
M03B6.2	M03B6.2	WBGene00010834	chrX	chrX:13852837-13857256	0.0300408	14.3399	8.8989	0.00824152	yes
M03C11.3	M03C11.3	WBGene00010840	chrIII	chrIII:10399147-10414606	33.3049	6.73008	-2.30704	0.0473616	yes
M03F8.4	M03F8.4	WBGene00019763	chrV	chrV:5930898-5933412	9.40668	47.8278	2.34609	0.00935955	yes
M04B2.4	M04B2.4	WBGene00010847	chrIV	chrIV:11518406-11521008	32.1587	8.08764	-1.99142	0.0270841	yes
M05B5.4	M05B5.4	WBGene00010872	chrI	chrI:7188492-7190560	2.15804	61.8433	4.84083	4.89e-05	yes
M05D6.6	M05D6.6	WBGene00010879	chrII	chrII:8482324-8483821	150.499	31.612	-2.25121	0.00384531	yes
M110.3	M110.3	WBGene00010913	chrII	chrII:8214527-8216501	450.261	139.333	-1.69222	0.0107553	yes
M116.2	M116.2	WBGene00019789	chrIV	chrIV:8398849-8399780	116.537	34.7906	-1.74402	0.0317294	yes
M151.7	M151.7	WBGene00019799	chrII	chrII:3622316-3624001	0.0345616	13.363	8.59486	0.0156414	yes
M163.1	M163.1	WBGene00010935	chrX	chrX:14502426-14503770	1.70828	19.3825	3.50413	0.0225717	yes
M199.2	M199.2	WBGene00010951	chrIV	chrIV:15108742-15110882	0.0232204	6.43555	8.11453	0.0319215	yes
M28.5	M28.5	WBGene00010896	chrII	chrII:10657956-10658569	74.3208	295.179	1.98975	0.00842221	yes
M57.1	M57.1	WBGene00019777	chrIV	chrIV:3533636-3539042	1.66263	11.581	2.80022	0.0296391	yes
M60.4	M60.4	WBGene00019780	chrX	chrX:8232304-8236263	7.28567	179.667	4.62412	1.89e-05	yes
M60.6	M60.6	WBGene00019781	chrX	chrX:8248155-8252407	0.870321	67.4647	6.27644	0.000461145	yes
R03A10.1	R03A10.1	WBGene00010981	chrX	chrX:15429941-15431046	1.05075	178.799	7.41078	0.00379829	yes
R04A9.5	R04A9.5	WBGene00019864	chrX	chrX:384382-388798	0.79446	28.2528	5.15227	0.000523395	yes
R04D3.2	R04D3.2	WBGene00011010	chrX	chrX:13285070-13286564	14.7507	58.7699	1.9943	0.0210317	yes
R04D3.3	R04D3.3	WBGene00011011	chrX	chrX:13288926-13290559	0.0708655	13.2983	7.55195	0.00184727	yes
R04E5.9	R04E5.9	WBGene00019872	chrX	chrX:8806062-8810982	1.17487	31.6787	4.75294	0.00126384	yes
R04F11.2	R04F11.2	WBGene00011015	chrV	chrV:12318365-12332098	635.249	163.867	-1.9548	0.00357345	yes
R05D7.2	R05D7.2	WBGene00011027	chrI	chrI:12165719-12168013	0.0595949	10.1315	7.40944	0.0477907	yes
R05G6.4	R05G6.4	WBGene00019898	chrIV	chrIV:7513219-7516256	93.6088	29.2317	-1.67911	0.0411261	yes
R05H11.1	R05H11.1	WBGene00019907	chrIII	chrIII:6795583-6797667	0.0245415	12.1499	8.95151	0.0143025	yes
R06C7.1	R06C7.1	WBGene00011061	chrI	chrI:7235381-7238787	198.001	73.4887	-1.42992	0.029426	yes
R06C7.2	R06C7.2	WBGene00011062	chrI	chrI:7233657-7234499	292.037	44.3261	-2.71992	0.000123536	yes
R07B7.10	R07B7.10	WBGene00011094	chrV	chrV:12084406-12086281	0.0320005	23.733	9.53459	0.0113547	yes
R07E4.5	R07E4.5	WBGene00019938	chrX	chrX:5949507-5953139	0.0229656	11.2725	8.93911	0.00892808	yes
R07E5.7	R07E5.7	WBGene00011115	chrIII	chrIII:4418314-4419141	118.893	29.7271	-1.99982	0.0172872	yes
R08B4.3	R08B4.3	WBGene00011139	chrX	chrX:11118907-11120933	1.10116	73.6599	6.06378	0.000653191	yes
R08E3.3	R08E3.3	WBGene00019959	chrX	chrX:4818568-4821678	8.65317	70.5538	3.02742	0.00131734	yes
R09A8.1	R09A8.1	WBGene00011152	chrX	chrX:12613692-12617812	0.0209329	8.5057	8.66652	0.0124288	yes
R09F10.3	R09F10.3	WBGene00019987	chrX	chrX:8294572-8296612	2.50605	14.5729	2.5398	0.0414754	yes
R09F10.8	R09F10.8	WBGene00019989	chrX	chrX:8325081-8326400	0.0103383	52.3668	12.3064	0.000961827	yes
R119.1	R119.1	WBGene00020087	chrI	chrI:357238-363904	62.3829	13.6144	-2.19602	0.00353284	yes
R11A5.3	R11A5.3	WBGene00011231	chrI	chrI:7862836-7863548	129.016	489.827	1.92472	0.00751966	yes
R11A5.4	R11A5.4	WBGene00011232	chrI	chrI:7866126-7875555	18.6296	396.467	4.41153	1.98e-05	yes
R11H6.2	R11H6.2	WBGene00011250	chrV	chrV:14597923-14600076	88.8751	30.4136	-1.54706	0.0401898	yes
R12B2.2	R12B2.2	WBGene00020018	chrIII	chrIII:5807773-5809082	3.02118	128.818	5.41408	0.000424043	yes
R12C12.5	R12C12.5	WBGene00020025	chrII	chrII:6044111-6045147	14.6079	184.422	3.65819	5.44e-06	yes
R144.3	R144.3	WBGene00020093	chrIII	chrIII:5022010-5023164	148.405	39.7253	-1.90141	0.0162317	yes
R151.1	R151.1	WBGene00020106	chrIII	chrIII:7216463-7219554	0.544224	29.6501	5.76769	0.0018329	yes
R151.2	R151.2	WBGene00020107	chrIII	chrIII:7210010-7215211	18.8259	82.8812	2.13832	0.0367643	yes
R17.2	R17.2	WBGene00011268	chrIII	chrIII:10839925-10844836	330.081	124.579	-1.40576	0.0345899	yes
T01B6.3	T01B6.3	WBGene00020135	chrX	chrX:2314910-2319325	0.625626	30.5608	5.61024	0.00613439	yes
T01D3.5	T01D3.5	WBGene00011329	chrV	chrV:13711346-13715260	61.7006	14.3839	-2.10083	0.0107553	yes
T01G9.3	T01G9.3	WBGene00011345	chrI	chrI:8274005-8288119	0.56349	46.1698	6.35642	0.0441125	yes
T01H3.5	T01H3.5	WBGene00011351	chrII	chrII:7879721-7880366	29.0754	2.29311	-3.66442	0.0417604	yes
T02H6.11	T02H6.11	WBGene00020181	chrII	chrII:700488-701134	559.41	148.888	-1.90968	0.00515133	yes
T03F1.1	T03F1.1	WBGene00020184	chrI	chrI:3874039-3875994	43.3729	9.33852	-2.21553	0.0108803	yes
T03F6.3	T03F6.3	WBGene00011399	chrIII	chrIII:13389305-13390756	85.0694	17.7731	-2.25894	0.00831051	yes
T03G11.6	T03G11.6	WBGene00020199	chrX	chrX:5177495-5179166	0.537989	53.5425	6.63696	0.00021039	yes
T04D3.1	T04D3.1	WBGene00011431	chrI	chrI:13302764-13304293	0	15.6622	1.79769e+308	0.0108547	yes
T04D3.5	T04D3.5	WBGene00011434	chrI	chrI:13325607-13333325	6.18816	110.228	4.15483	8.52e-06	yes
T04G9.1	T04G9.1	WBGene00020214	chrX	chrX:788351-796141	0.00856581	11.6061	10.404	0.00209664	yes
T05E11.3	T05E11.3	WBGene00011480	chrIV	chrIV:11119322-11124826	347.235	1500.85	2.1118	0.0122868	yes
T05F1.13	T05F1.13	WBGene00011497	chrI	chrI:9650557-9652805	0.0724401	21.0966	8.18601	0.0162317	yes
T05H10.4	T05H10.4	WBGene00011509	chrII	chrII:8053084-8054913	0.0821061	6.30104	6.26196	0.0122868	yes
T07A9.15	T07A9.15	WBGene00045249	chrIV	chrIV:393157-393515	826.239	227.939	-1.85791	0.0179616	yes
T07F12.2	T07F12.2	WBGene00020322	chrX	chrX:4890190-4892298	7.00425	317.259	5.50129	4.62e-12	yes
T09B9.4	T09B9.4	WBGene00011645	chrX	chrX:9771655-9774296	2.42264	31.0646	3.68062	0.000320564	yes
T10B10.3	T10B10.3	WBGene00011680	chrX	chrX:15173833-15181397	0.462757	32.9734	6.1549	0.000138381	yes
T10C6.7	T10C6.7	WBGene00011689	chrV	chrV:16029555-16031647	0.0114315	4.65117	8.66844	0.0378993	yes
T10D4.3	T10D4.3	WBGene00020407	chrII	chrII:3129181-3131291	2.05537	25.9024	3.65562	0.00751966	yes
T12G3.1	T12G3.1	WBGene00011737	chrIV	chrIV:12034229-12037027	2.67662	27.6152	3.36698	0.000367396	yes
T13C2.4	T13C2.4	WBGene00020480	chrII	chrII:6777033-6777790	223.673	70.63	-1.66304	0.0372882	yes
T13F2.2	T13F2.2	WBGene00011743	chrIV	chrIV:9796669-9797336	340.776	93.991	-1.85823	0.0131116	yes
T13H5.6	T13H5.6	WBGene00011760	chrII	chrII:8526751-8531171	0.355287	8.15631	4.52086	0.0293875	yes
T14F9.2	T14F9.2	WBGene00020508	chrX	chrX:2233988-2236676	0	13.3995	1.79769e+308	0.0144188	yes
T14G8.3	T14G8.3	WBGene00011771	chrX	chrX:12861166-12869958	7.09746	98.1872	3.79016	2.82e-08	yes
T16G12.4	T16G12.4	WBGene00011805	chrIII	chrIII:10057753-10058585	16.6059	71.519	2.10663	0.0321703	yes
T16G12.8	T16G12.8	WBGene00011809	chrIII	chrIII:10059210-10061828	0.660151	23.1274	5.13067	0.00569102	yes
T16H12.1	T16H12.1	WBGene00011811	chrIII	chrIII:10083548-10085972	47.3497	4.0036	-3.56399	0.000781538	yes
T16H12.11	T16H12.11	WBGene00011819	chrIII	chrIII:10087131-10088454	60.3054	15.8669	-1.92627	0.0301371	yes
T18D3.1	T18D3.1	WBGene00011820	chrX	chrX:12454676-12457876	0.0201832	6.22907	8.26972	0.00337033	yes
T19B10.6	T19B10.6	WBGene00011834	chrV	chrV:11237430-11239305	471.353	184.508	-1.35313	0.0434576	yes
T19H5.4	T19H5.4	WBGene00011849	chrII	chrII:9486328-9488199	0.134467	11.8298	6.45903	0.0139383	yes
T20B12.7	T20B12.7	WBGene00020604	chrIII	chrIII:7377788-7378982	391.966	123.805	-1.66265	0.0123944	yes
T20F10.2	T20F10.2	WBGene00011864	chrI	chrI:10298205-10300578	2.57023	84.2972	5.03551	0.0095327	yes
T20F7.1	T20F7.1	WBGene00020630	chrX	chrX:16872852-16880453	2.96202	30.2692	3.3532	0.000800899	yes
T20F7.6	T20F7.6	WBGene00020633	chrX	chrX:16866009-16868958	0	6.86674	1.79769e+308	0.0348167	yes
T21B4.17	T21B4.17	WBGene00044032	chrII	chrII:12520147-12524413	4.59175	21.3738	2.21873	0.0462162	yes
T21C9.13	T21C9.13	WBGene00011898	chrV	chrV:10597293-10598643	347.823	100.393	-1.79269	0.00615257	yes
T21F4.1	T21F4.1	WBGene00020658	chrX	chrX:5630320-5631732	0.0137171	24.1492	10.7818	0.00530095	yes
T22D1.5	T22D1.5	WBGene00020684	chrIV	chrIV:6903941-6905534	84.4214	22.3173	-1.91944	0.012651	yes
T22E7.1	T22E7.1	WBGene00020693	chrI	chrI:5768965-5773620	0.397333	82.815	7.7034	0.00243416	yes
T22F3.2	T22F3.2	WBGene00020695	chrV	chrV:3586636-3589002	10.5218	60.3038	2.51888	0.0259851	yes
T23B3.2	T23B3.2	WBGene00020710	chrI	chrI:6715950-6716983	0.573232	37.3064	6.02416	0.0119895	yes
T23F2.5	T23F2.5	WBGene00020738	chrX	chrX:5516674-5517121	0.5888	39.4953	6.06776	0.0341636	yes
T24B8.3	T24B8.3	WBGene00011977	chrII	chrII:9059327-9061078	3.61847	229.008	5.98387	6.07e-05	yes
T25E12.6	T25E12.6	WBGene00012021	chrV	chrV:16742468-16744790	0.890413	19.7611	4.47204	0.0168751	yes
T25G12.11	T25G12.11	WBGene00020817	chrX	chrX:17236827-17237781	0.0303778	100.919	11.6979	0.00103637	yes
T25G3.4	T25G3.4	WBGene00012031	chrI	chrI:7564579-7567712	17.5657	73.1164	2.05743	0.00298794	yes
T26A8.4	T26A8.4	WBGene00020827	chrIV	chrIV:8428969-8431482	84.5815	29.3279	-1.52807	0.0343589	yes
T26C11.4	T26C11.4	WBGene00020830	chrX	chrX:1840560-1845531	0.03045	4.23272	7.119	0.0162533	yes
T26F2.2	T26F2.2	WBGene00012058	chrV	chrV:13981532-13982956	0.293006	14.1017	5.58879	0.0298777	yes
T26F2.3	T26F2.3	WBGene00045401	chrV	chrV:13979555-13980892	0	25.5555	1.79769e+308	0.00780975	yes
T27A3.1	T27A3.1	WBGene00020838	chrI	chrI:6122591-6126853	0.495818	19.5841	5.30372	0.0330992	yes
T27F2.2	T27F2.2	WBGene00012100	chrV	chrV:11631425-11637188	1.83738	13.1661	2.84111	0.0145121	yes
T27F6.4	T27F6.4	WBGene00012104	chrI	chrI:12484170-12486450	2335.22	501.164	-2.2202	0.000343277	yes
T27F7.1	T27F7.1	WBGene00020866	chrII	chrII:4994026-4997979	401.628	69.3605	-2.53367	0.000474905	yes
T27F7.3	T27F7.3	WBGene00020868	chrII	chrII:4990824-4993576	390.353	109.941	-1.82805	0.0166768	yes
T28C6.9	T28C6.9	WBGene00044793	chrIV	chrIV:8831599-8840669	0.127579	7.06315	5.79084	0.00241362	yes
T28F4.1	T28F4.1	WBGene00012136	chrI	chrI:7473049-7476942	0	14.0883	1.79769e+308	0.0326581	yes
F53A2.7	F53A2.7	WBGene00009952	chrIII	chrIII:13344839-13346758	109.762	30.1184	-1.86566	0.0108954	yes
Y39E4A.3	Y39E4A.3	WBGene00012713	chrIII	chrIII:12967840-12972397	88.4063	11.0863	-2.99537	4.23e-05	yes
VH15N14R.1	VH15N14R.1	WBGene00012151	chrI	chrI:7781172-7782543	0.58186	19.5491	5.07028	0.0279691	yes
W01A11.2	W01A11.2	WBGene00020910	chrV	chrV:6497092-6498469	100.094	21.9291	-2.19044	0.00421924	yes
W01A8.2	W01A8.2	WBGene00012164	chrI	chrI:7053749-7056874	300.688	49.3864	-2.60608	0.000508706	yes
W01D2.5	W01D2.5	WBGene00012182	chrII	chrII:14812490-14814798	43.7	10.1762	-2.10243	0.0180274	yes
W02A11.2	W02A11.2	WBGene00012193	chrI	chrI:12733288-12741217	792.178	252.909	-1.64721	0.0172335	yes
W02B12.11	W02B12.11	WBGene00012206	chrII	chrII:11473796-11475956	38.6272	11.617	-1.73338	0.0457801	yes
W02B8.2	W02B8.2	WBGene00012198	chrII	chrII:13908850-13915117	5.77203	28.0151	2.27905	0.00533866	yes
W02D9.10	W02D9.10	WBGene00012216	chrI	chrI:12551527-12552334	1.20626	27.9334	4.53338	0.033639	yes
W02D9.4	W02D9.4	WBGene00012210	chrI	chrI:12537696-12538945	74.4446	9.90951	-2.90928	0.00112619	yes
W03A5.1	W03A5.1	WBGene00020966	chrIII	chrIII:5408070-5413138	0.0381805	21.9474	9.167	0.00301779	yes
W03A5.2	W03A5.2	WBGene00020967	chrIII	chrIII:5406076-5407929	10.7842	182.945	4.08442	4.26e-06	yes
W03F8.10	W03F8.10	WBGene00020998	chrIV	chrIV:5180180-5183700	0.586662	6.67457	3.50807	0.0351873	yes
W03F8.4	W03F8.4	WBGene00020994	chrIV	chrIV:5184114-5185224	126.866	42.2701	-1.5856	0.0436631	yes
W03F9.1	W03F9.1	WBGene00020999	chrV	chrV:124045-126745	202.657	22.6518	-3.16134	6.5e-07	yes
W03G9.8	W03G9.8	WBGene00044431	chrI	chrI:4957776-4958310	576.252	70.6271	-3.02841	3.21e-05	yes
W04A8.4	W04A8.4	WBGene00012239	chrI	chrI:13841882-13843234	3.71377	47.4616	3.6758	0.000946146	yes
W04A8.6	W04A8.6	WBGene00012241	chrI	chrI:13853066-13859539	10.0916	1.4922	-2.75764	0.0268557	yes
W05H9.2	W05H9.2	WBGene00021049	chrX	chrX:6267012-6271015	5.07401	58.6239	3.53029	5.44e-06	yes
W05H9.3	W05H9.3	WBGene00021050	chrX	chrX:6252239-6253743	12.0058	146.451	3.60861	4.24e-07	yes
W05H9.4	W05H9.4	WBGene00021051	chrX	chrX:6263611-6266873	0.750658	45.6348	5.92583	4.98e-06	yes
W06B4.1	W06B4.1	WBGene00021056	chrII	chrII:4471400-4473552	55.9464	10.3762	-2.43077	0.00348441	yes
W06H3.3	W06H3.3	WBGene00012316	chrV	chrV:16795310-16801790	13.9884	2.76525	-2.33875	0.0361064	yes
W07E11.1	W07E11.1	WBGene00012326	chrX	chrX:10083946-10104004	1.50301	69.5268	5.53164	0	yes
W08A12.4	W08A12.4	WBGene00021081	chrV	chrV:3674601-3676619	0.389993	175.551	8.81423	0.000324341	yes
W08E3.2	W08E3.2	WBGene00012343	chrI	chrI:13333368-13336132	7.7115	29.0303	1.91247	0.0295771	yes
W10G11.20	W10G11.20	WBGene00021149	chrII	chrII:3553782-3554622	221.592	53.223	-2.05779	0.00764206	yes
Y102A5C.2	Y102A5C.2	WBGene00013611	chrV	chrV:16918785-16919523	110.807	15.7362	-2.81589	0.00396995	yes
Y105C5A.1	Y105C5A.1	WBGene00013632	chrIV	chrIV:15550821-15554688	0.241094	20.4998	6.40987	0.000268579	yes
Y105C5A.14	Y105C5A.14	WBGene00013638	chrIV	chrIV:15646121-15648080	0.215366	19.1504	6.47444	0.0127682	yes
Y106G6D.6	Y106G6D.6	WBGene00013702	chrI	chrI:10117050-10122092	91.4952	27.7931	-1.71897	0.01126	yes
Y110A7A.4	Y110A7A.4	WBGene00022455	chrI	chrI:5138263-5139383	26.6295	110.539	2.05346	0.00851602	yes
Y111B2A.19	Y111B2A.19	WBGene00013739	chrIII	chrIII:12688225-12697445	14.2828	2.81022	-2.34553	0.0427492	yes
Y119C1B.5	Y119C1B.5	WBGene00022471	chrI	chrI:4511440-4516084	0.681488	13.4882	4.30687	0.00317929	yes
Y17G7B.13	Y17G7B.13	WBGene00012466	chrII	chrII:12042845-12047932	13.6263	1.02855	-3.72771	0.0118764	yes
Y17G9B.8	Y17G9B.8	WBGene00021205	chrIV	chrIV:4757172-4758700	157.698	43.3188	-1.86409	0.0112918	yes
Y17G9B.9	Y17G9B.9	WBGene00021206	chrIV	chrIV:4758975-4760420	210.755	49.2492	-2.09739	0.00177316	yes
Y23H5B.5	Y23H5B.5	WBGene00021276	chrI	chrI:2498135-2506235	23.9412	6.16508	-1.95731	0.0317294	yes
Y24F12A.1	Y24F12A.1	WBGene00012496	chrIV	chrIV:11605284-11607434	145.845	41.8471	-1.80124	0.0102577	yes
Y2H9A.4	Y2H9A.4	WBGene00012381	chrV	chrV:13446002-13448801	0.133577	9.62013	6.17031	0.0345899	yes
Y2H9A.6	Y2H9A.6	WBGene00086568	chrV	chrV:13444101-13445041	0.123072	22.8669	7.53761	0.0312859	yes
Y32H12A.5	Y32H12A.5	WBGene00021313	chrIII	chrIII:5375662-5379891	122.318	14.1009	-3.11679	2.03e-06	yes
Y32H12A.8	Y32H12A.8	WBGene00021316	chrIII	chrIII:5385486-5404946	3.24945	22.5932	2.79762	1.12e-05	yes
Y34B4A.2	Y34B4A.2	WBGene00021319	chrX	chrX:5279496-5281122	1.01787	35.6992	5.13227	0.00751966	yes
Y34B4A.8	Y34B4A.8	WBGene00021324	chrX	chrX:5271810-5275250	0.0198784	6.12334	8.26697	0.0217632	yes
Y34D9A.3	Y34D9A.3	WBGene00021329	chrI	chrI:1034474-1040871	356.701	126.84	-1.4917	0.0208222	yes
Y34D9A.7	Y34D9A.7	WBGene00021332	chrI	chrI:1041486-1048189	23.7857	4.52543	-2.39397	0.0342891	yes
Y34F4.5	Y34F4.5	WBGene00021340	chrIII	chrIII:1026904-1028404	111.852	16.6426	-2.74863	0.00240956	yes
Y37A1B.17	Y37A1B.17	WBGene00044989	chrIV	chrIV:13964341-13979814	0.633482	16.2074	4.67721	4.75e-05	yes
Y37B11A.2	Y37B11A.2	WBGene00021344	chrIII	chrIII:5774636-5781974	5.01184	17.1533	1.77507	0.0498374	yes
Y37D8A.2	Y37D8A.2	WBGene00012544	chrIII	chrIII:12818622-12825547	119.856	32.4685	-1.88419	0.00672818	yes
Y37E11AR.3	Y37E11AR.3	WBGene00021370	chrIV	chrIV:3735837-3738931	24.6734	138.782	2.49179	0.00292255	yes
Y37E11B.2	Y37E11B.2	WBGene00021375	chrIV	chrIV:3578440-3579386	1.33747	18.4569	3.78658	0.0460375	yes
Y37E11B.6	Y37E11B.6	WBGene00021378	chrIV	chrIV:3598652-3599234	461.903	135.035	-1.77425	0.0169152	yes
Y37F4.6	Y37F4.6	WBGene00021387	chrI	chrI:10870026-10873996	1.15507	17.0525	3.88393	0.0130865	yes
Y37H9A.5	Y37H9A.5	WBGene00014871	chrI	chrI:13796168-13796878	60.2081	9.38179	-2.68202	0.0329359	yes
Y38C1AA.12	Y38C1AA.12	WBGene00021402	chrIV	chrIV:192264-194737	14.5411	1.95767	-2.89293	0.00713598	yes
Y38F1A.1	Y38F1A.1	WBGene00012605	chrII	chrII:12952420-12954717	1.82972	102.214	5.80384	2.02e-05	yes
Y38F1A.2	Y38F1A.2	WBGene00012606	chrII	chrII:12954910-12957935	0.0258998	6.48093	7.96712	0.0463146	yes
Y38F1A.6	Y38F1A.6	WBGene00012608	chrII	chrII:12994288-12996278	1.10562	28.3408	4.67995	0.00112619	yes
Y38H8A.3	Y38H8A.3	WBGene00012637	chrIV	chrIV:13472481-13473955	0.0373376	12.4301	8.37899	0.0248283	yes
Y39A1A.21	Y39A1A.21	WBGene00012658	chrIII	chrIII:10700595-10706923	51.253	6.2809	-3.0286	0.0474235	yes
Y39A1A.9	Y39A1A.9	WBGene00012648	chrIII	chrIII:10629978-10633402	0.20905	11.035	5.72209	0.00644194	yes
Y39A3CR.3	Y39A3CR.3	WBGene00021444	chrIII	chrIII:1860419-1877106	10.1842	2.40987	-2.07931	0.0488685	yes
Y39B6A.13	Y39B6A.13	WBGene00012675	chrV	chrV:19118483-19119338	562.617	101.749	-2.46714	0.000129286	yes
Y39B6A.16	Y39B6A.16	WBGene00012678	chrV	chrV:19099126-19101079	47.7008	9.28897	-2.36042	0.0225025	yes
Y39B6A.25	Y39B6A.25	WBGene00012684	chrV	chrV:19026433-19031561	7.44564	0	-1.79769e+308	0.045824	yes
Y39B6A.37	Y39B6A.37	WBGene00012695	chrV	chrV:18990828-18993770	148.274	48.987	-1.5978	0.0277592	yes
Y39B6A.42	Y39B6A.42	WBGene00012700	chrV	chrV:18968024-18969588	210.757	15.1714	-3.79616	0.000625564	yes
Y39G10AR.7	Y39G10AR.7	WBGene00021465	chrI	chrI:2316308-2318287	58.615	19.0333	-1.62274	0.0384113	yes
Y40D12A.1	Y40D12A.1	WBGene00021502	chrIII	chrIII:6615360-6619995	8.62759	73.327	3.08732	0.0124288	yes
Y41D4A.6	Y41D4A.6	WBGene00021508	chrIV	chrIV:1741071-1745523	230.262	73.0063	-1.65719	0.0129521	yes
Y42A5A.1	Y42A5A.1	WBGene00012776	chrV	chrV:11088135-11097952	0.0199495	4.71124	7.88361	0.00824152	yes
Y43F8B.2	Y43F8B.2	WBGene00012813	chrV	chrV:19503081-19533080	14.5424	277.232	4.25276	5.85e-05	yes
Y45G5AM.3	Y45G5AM.3	WBGene00021556	chrV	chrV:4164829-4166744	2.74047	18.6673	2.76801	0.041225	yes
Y46G5A.2	Y46G5A.2	WBGene00012895	chrII	chrII:12679884-12686644	13.3758	2.16699	-2.62585	0.0393437	yes
Y46G5A.8	Y46G5A.8	WBGene00012900	chrII	chrII:12756282-12757565	0.472141	19.9728	5.40267	0.0317294	yes
Y46H3A.7	Y46H3A.7	WBGene00044344	chrV	chrV:1821588-1823084	54.537	14.176	-1.94379	0.0364355	yes
Y47D3B.4	Y47D3B.4	WBGene00012941	chrIII	chrIII:11405292-11409324	0.00732239	2.39899	8.3559	0.0492121	yes
Y47G6A.3	Y47G6A.3	WBGene00021633	chrI	chrI:3602022-3602861	33.2949	3.04901	-3.44889	0.0317294	yes
Y47G6A.7	Y47G6A.7	WBGene00021637	chrI	chrI:3502740-3508427	2.76803	19.13	2.7889	0.0293394	yes
Y47H9C.9	Y47H9C.9	WBGene00012952	chrI	chrI:11898779-11901449	8.61528	0.697645	-3.62633	0.00738648	yes
Y48B6A.13	Y48B6A.13	WBGene00012984	chrII	chrII:14220880-14226202	118.335	13.963	-3.0832	0.00227198	yes
Y48G10A.1	Y48G10A.1	WBGene00013018	chrI	chrI:13489548-13491215	41.0362	4.72413	-3.11878	0.00348441	yes
Y48G9A.11	Y48G9A.11	WBGene00021704	chrIII	chrIII:2112403-2116887	49.4263	9.5199	-2.37626	0.0102382	yes
Y49A10A.2	Y49A10A.2	WBGene00044949	chrX	chrX:10371163-10372292	0	24.5657	1.79769e+308	0.0313873	yes
Y49E10.20	Y49E10.20	WBGene00013039	chrIII	chrIII:12453486-12456751	106.386	16.1776	-2.71724	0.000110229	yes
Y49F6B.9	Y49F6B.9	WBGene00021721	chrII	chrII:3493936-3499396	64.4316	11.9195	-2.43445	0.00901032	yes
Y4C6A.3	Y4C6A.3	WBGene00021153	chrIV	chrIV:5450984-5452417	7.60216	40.2397	2.40414	0.0149403	yes
Y4C6B.5	Y4C6B.5	WBGene00021159	chrIV	chrIV:5319244-5325023	3.17226	17.8525	2.49254	0.0341636	yes
Y50D4A.5	Y50D4A.5	WBGene00021739	chrV	chrV:1207309-1207777	228.014	36.8818	-2.62814	0.00452485	yes
Y50D7A.5	Y50D7A.5	WBGene00021755	chrIII	chrIII:230433-235051	77.0314	10.5071	-2.87408	0.0111271	yes
Y51H1A.2	Y51H1A.2	WBGene00013093	chrII	chrII:13862566-13872222	26.0615	6.7005	-1.95958	0.0353463	yes
Y52E8A.2	Y52E8A.2	WBGene00021795	chrII	chrII:4320851-4321555	123.053	18.308	-2.74874	0.00307202	yes
Y53C10A.3	Y53C10A.3	WBGene00013134	chrI	chrI:11968942-11969838	31.411	1.65585	-4.24562	0.0208724	yes
Y53F4B.6	Y53F4B.6	WBGene00013153	chrII	chrII:14985623-14986716	74.0133	5.85959	-3.65891	0.0440728	yes
Y54E10BR.2	Y54E10BR.2	WBGene00021841	chrI	chrI:3032968-3034763	42.5626	7.83927	-2.44079	0.0245783	yes
Y54E5B.2	Y54E5B.2	WBGene00013204	chrI	chrI:14807455-14820211	147.373	47.495	-1.63363	0.0255816	yes
Y54F10BM.3	Y54F10BM.3	WBGene00021858	chrIII	chrIII:2277267-2289956	21.1966	4.19752	-2.33622	0.0180573	yes
Y54F10BM.9	Y54F10BM.9	WBGene00021863	chrIII	chrIII:2295332-2304904	2.50435	54.3181	4.43893	4.02e-08	yes
Y54G11A.3	Y54G11A.3	WBGene00013214	chrII	chrII:14276574-14283883	1048.31	244.157	-2.10218	0.000625565	yes
Y54G11A.7	Y54G11A.7	WBGene00013216	chrII	chrII:14297220-14301974	0.975519	33.863	5.1174	0.0159096	yes
Y54G11A.9	Y54G11A.9	WBGene00013218	chrII	chrII:14344629-14346081	54.8966	13.688	-2.0038	0.0425745	yes
Y54G2A.4	Y54G2A.4	WBGene00021870	chrIV	chrIV:2931406-2936823	3.82753	31.4096	3.03672	0.00379829	yes
Y54G2A.50	Y54G2A.50	WBGene00044493	chrIV	chrIV:2918730-2919457	85.1677	19.7359	-2.10949	0.0440305	yes
Y55B1BR.2	Y55B1BR.2	WBGene00021912	chrIII	chrIII:434909-440135	2.05143	11.6336	2.5036	0.0353463	yes
Y55F3AR.1	Y55F3AR.1	WBGene00021932	chrIV	chrIV:1097452-1102896	47.2164	10.4947	-2.16962	0.0277112	yes
Y55F3AR.2	Y55F3AR.2	WBGene00021933	chrIV	chrIV:1094549-1096558	27.9674	0.880396	-4.98945	0.00252393	yes
Y55F3BR.6	Y55F3BR.6	WBGene00021943	chrIV	chrIV:835047-838536	8.35676	0.320096	-4.70637	0.0236266	yes
Y55F3BR.7	Y55F3BR.7	WBGene00021944	chrIV	chrIV:840828-842118	9.79668	0.178949	-5.77467	0.021817	yes
Y57A10A.1	Y57A10A.1	WBGene00013246	chrII	chrII:12133470-12147070	24.7911	8.05162	-1.62247	0.0365129	yes
Y57G11B.1	Y57G11B.1	WBGene00013294	chrIV	chrIV:14549798-14551929	3.06517	19.3086	2.65521	0.0453178	yes
Y57G11C.499	Y57G11C.499	WBGene00077762	chrIV	chrIV:14754056-14754902	46.1363	9.10639	-2.34095	0.0384505	yes
Y58A7A.3	Y58A7A.3	WBGene00021977	chrV	chrV:5077833-5080881	1.47426	8.17454	2.47114	0.045824	yes
Y59A8B.12	Y59A8B.12	WBGene00013349	chrV	chrV:18085601-18086190	127.341	18.4325	-2.78838	0.00452485	yes
Y59A8B.21	Y59A8B.21	WBGene00013353	chrV	chrV:17986250-17994236	12.0314	1.22187	-3.29965	0.0225717	yes
Y59A8B.6	Y59A8B.6	WBGene00013343	chrV	chrV:18022448-18042304	33.5088	90.1551	1.42787	0.0401743	yes
Y59H11AR.2	Y59H11AR.2	WBGene00022010	chrIV	chrIV:8585528-8594584	0.00980753	8.33112	9.73041	0.0155177	yes
Y62E10A.13	Y62E10A.13	WBGene00013379	chrIV	chrIV:13389132-13398775	99.0253	14.8082	-2.7414	0.00656201	yes
Y62E10A.14	Y62E10A.14	WBGene00013380	chrIV	chrIV:13399075-13400484	401.439	30.6258	-3.71236	4.63e-09	yes
Y62F5A.12	Y62F5A.12	WBGene00077453	chrII	chrII:11533966-11534413	204.684	33.2372	-2.62252	0.00851602	yes
Y65B4A.6	Y65B4A.6	WBGene00022029	chrI	chrI:631096-636353	21.5449	2.33703	-3.2046	0.00911056	yes
Y66A7A.5	Y66A7A.5	WBGene00013425	chrIII	chrIII:11616658-11623869	80.149	26.4364	-1.60016	0.0279116	yes
Y66D12A.18	Y66D12A.18	WBGene00013444	chrIII	chrIII:11510469-11511330	84.6071	13.0096	-2.7012	0.00289536	yes
Y66D12A.19	Y66D12A.19	WBGene00013445	chrIII	chrIII:11509026-11509687	84.7454	10.2933	-3.04143	0.00826412	yes
Y66D12A.23	Y66D12A.23	WBGene00013447	chrIII	chrIII:11488030-11492712	43.9577	12.881	-1.77087	0.0471805	yes
Y67A10A.9	Y67A10A.9	WBGene00013458	chrIV	chrIV:14394110-14400326	0.00934676	2.623	8.13254	0.0403477	yes
Y69A2AR.18	Y69A2AR.18	WBGene00022089	chrIV	chrIV:2495733-2497682	1160.74	261.275	-2.15141	0.0042039	yes
Y69A2AR.28	Y69A2AR.28	WBGene00022099	chrIV	chrIV:2612448-2613061	177.723	49.2823	-1.85049	0.0473871	yes
Y6E2A.5	Y6E2A.5	WBGene00012399	chrV	chrV:15716399-15718639	0	7.91806	1.79769e+308	0.0431111	yes
Y6E2A.7	Y6E2A.7	WBGene00012400	chrV	chrV:15719824-15721273	0	10.6594	1.79769e+308	0.0446288	yes
Y71A12B.12	Y71A12B.12	WBGene00013509	chrI	chrI:14004446-14008459	1.67641	29.2907	4.12699	0.0100625	yes
Y71D11A.3	Y71D11A.3	WBGene00022104	chrIII	chrIII:1116452-1142911	11.6775	0.748278	-3.96402	0.0326581	yes
Y71F9AL.1	Y71F9AL.1	WBGene00022107	chrI	chrI:2925219-2928119	232.95	61.4139	-1.92338	0.0039657	yes
Y71F9AL.11	Y71F9AL.11	WBGene00022116	chrI	chrI:2862404-2864448	21.198	1.07892	-4.29626	0.0191243	yes
Y71F9B.6	Y71F9B.6	WBGene00022128	chrI	chrI:2722520-2726653	26.9239	4.41817	-2.60737	0.00936358	yes
Y71G12B.13	Y71G12B.13	WBGene00022153	chrI	chrI:1702124-1707892	13.7036	2.28788	-2.58247	0.0438789	yes
Y71H2AM.7	Y71H2AM.7	WBGene00022172	chrIII	chrIII:2726075-2734003	161.119	52.1278	-1.628	0.0285632	yes
Y73B3A.20	Y73B3A.20	WBGene00022221	chrX	chrX:47798-48495	111.86	24.6618	-2.18134	0.0355808	yes
Y73B6BL.31	Y73B6BL.31	WBGene00022252	chrIV	chrIV:6442275-6446520	0	56.3326	1.79769e+308	0.00241509	yes
Y73C8B.3	Y73C8B.3	WBGene00022260	chrV	chrV:3191299-3193231	0.0666316	13.5173	7.66438	0.00306847	yes
Y75B12B.1	Y75B12B.1	WBGene00013567	chrV	chrV:15184688-15185789	56.6301	15.1634	-1.90097	0.0422559	yes
Y75B8A.13	Y75B8A.13	WBGene00013549	chrIII	chrIII:12203796-12215585	50.6471	17.7204	-1.51507	0.0375244	yes
Y76A2B.6	Y76A2B.6	WBGene00013578	chrIII	chrIII:13550598-13555233	6.8429	0.814384	-3.07083	0.0423571	yes
Y77E11A.1	Y77E11A.1	WBGene00022306	chrIV	chrIV:1497628-1509964	87.5989	23.9021	-1.87377	0.00988548	yes
Y82E9BR.2	Y82E9BR.2	WBGene00022335	chrIII	chrIII:1439087-1443182	104.88	18.1632	-2.52964	0.000320442	yes
Y94H6A.3	Y94H6A.3	WBGene00022376	chrIV	chrIV:2676509-2678447	301.393	80.2276	-1.90947	0.00424951	yes
Y95B8A.11	Y95B8A.11	WBGene00022390	chrI	chrI:889934-895102	199.17	39.7687	-2.3243	0.000474905	yes
Y9D1A.1	Y9D1A.1	WBGene00021186	chrII	chrII:7446145-7448499	1.57697	98.268	5.96149	8.16e-05	yes
Y9D1A.2	Y9D1A.2	WBGene00021187	chrII	chrII:7446145-7448499	1.71727	59.6394	5.11808	0.0188336	yes
ZC155.4	ZC155.4	WBGene00022532	chrIII	chrIII:5211967-5214966	238.055	29.2468	-3.02495	2.65e-06	yes
ZC196.3	ZC196.3	WBGene00022547	chrV	chrV:8736651-8738415	0	49.0529	1.79769e+308	0.00155816	yes
ZC196.4	ZC196.4	WBGene00022548	chrV	chrV:8733365-8735673	0	15.4374	1.79769e+308	0.013579	yes
ZC196.6	ZC196.6	WBGene00022550	chrV	chrV:8726505-8728872	0.102028	21.4707	7.71726	0.0107553	yes
ZC204.2	ZC204.2	WBGene00022554	chrII	chrII:1663802-1665769	2.28423	92.0762	5.33305	9.01e-07	yes
ZC239.6	ZC239.6	WBGene00022569	chrII	chrII:3209480-3211379	1.14552	38.9819	5.08873	8.16e-05	yes
ZC317.7	ZC317.7	WBGene00022590	chrV	chrV:5468668-5470981	219.436	75.8865	-1.53188	0.0242527	yes
ZC410.5	ZC410.5	WBGene00013882	chrIV	chrIV:9088595-9092177	12.1098	71.4993	2.56176	0.0393011	yes
ZC434.3	ZC434.3	WBGene00013891	chrI	chrI:10333540-10335730	12.1135	1.7492	-2.79185	0.0371087	yes
ZC434.8	ZC434.8	WBGene00013894	chrI	chrI:10348043-10349370	149.362	25.3118	-2.56093	0.000280957	yes
ZC443.3	ZC443.3	WBGene00013898	chrV	chrV:12812300-12814107	1.20821	28.3349	4.55164	0.00125906	yes
ZC443.4	ZC443.4	WBGene00013899	chrV	chrV:12816903-12819292	0.0370036	29.9598	9.66115	0.00302033	yes
ZC449.3	ZC449.3	WBGene00022613	chrX	chrX:5017892-5021033	0.0145009	6.33216	8.77041	0.0210117	yes
ZC449.5	ZC449.5	WBGene00022615	chrX	chrX:5034996-5037744	0.00557214	2.50233	8.81082	0.0328603	yes
ZC504.3	ZC504.3	WBGene00013917	chrX	chrX:10416640-10419691	2.64748	56.1889	4.40759	1.05e-06	yes
ZC8.6	ZC8.6	WBGene00022501	chrX	chrX:4972569-4997567	0.583175	18.2174	4.96525	0.011238	yes
ZC84.3	ZC84.3	WBGene00013847	chrIII	chrIII:9185998-9192673	1.10458	20.6453	4.22424	0.000268579	yes
ZK1053.4	ZK1053.4	WBGene00014199	chrI	chrI:13241652-13244719	0.0161258	3.55085	7.78265	0.00568539	yes
ZK1098.4	ZK1098.4	WBGene00014221	chrIII	chrIII:9543007-9544322	110.459	37.9126	-1.54276	0.0482375	yes
ZK1128.1	ZK1128.1	WBGene00014227	chrIII	chrIII:10113053-10114722	450.021	177.884	-1.33905	0.0456371	yes
ZK1290.5	ZK1290.5	WBGene00022887	chrII	chrII:7529597-7530779	0.759267	17.0525	4.48923	0.0492946	yes
ZK1320.11	ZK1320.11	WBGene00014259	chrII	chrII:9667738-9668496	3.26639	47.7485	3.86968	0.0113547	yes
ZK154.5	ZK154.5	WBGene00022667	chrX	chrX:7783139-7787884	0.00323241	2.66408	9.68681	0.014915	yes
ZK180.6	ZK180.6	WBGene00022680	chrIV	chrIV:4520173-4524930	0.0099411	1.77127	7.47716	0.00950914	yes
ZK287.7	ZK287.7	WBGene00013967	chrV	chrV:9692874-9694697	41.7012	9.15652	-2.18722	0.0167028	yes
ZK418.6	ZK418.6	WBGene00022735	chrIII	chrIII:7074223-7078774	1.16008	11.1734	3.26778	0.0113503	yes
ZK418.8	ZK418.8	WBGene00022737	chrIII	chrIII:7083622-7084999	316.318	76.6402	-2.0452	0.00165783	yes
ZK512.1	ZK512.1	WBGene00013982	chrIII	chrIII:9115004-9117193	0.133627	22.0417	7.36588	0.0287948	yes
ZK563.5	ZK563.5	WBGene00022769	chrX	chrX:3377186-3379220	10.2799	124.582	3.59921	0.000234679	yes
ZK643.5	ZK643.5	WBGene00014036	chrIII	chrIII:8944737-8956119	79.4254	26.9996	-1.55666	0.0471667	yes
ZK673.2	ZK673.2	WBGene00014058	chrII	chrII:10448203-10450167	99.2904	31.9649	-1.63517	0.0412251	yes
ZK686.1	ZK686.1	WBGene00022791	chrIII	chrIII:7773068-7773758	133.402	25.6113	-2.38094	0.0274052	yes
ZK686.6	ZK686.6	WBGene00044799	chrIII	chrIII:7771525-7772494	13.5152	1.39862	-3.27251	0.049771	yes
ZK792.7	ZK792.7	WBGene00014079	chrIV	chrIV:11694389-11696354	26.9459	2.17326	-3.63214	0.00360921	yes
ZK822.1	ZK822.1	WBGene00014089	chrIV	chrIV:11918086-11922091	0.016951	3.55508	7.71237	0.0373098	yes
ZK829.9	ZK829.9	WBGene00014097	chrIV	chrIV:11970510-11972629	0.00696775	2.35937	8.40349	0.0426094	yes
ZK896.9	ZK896.9	WBGene00014139	chrIV	chrIV:12855532-12859350	42.1333	10.5108	-2.00309	0.0321703	yes
aat-2	F07C3.7	WBGene00000003	chrV	chrV:9244388-9246337	0.0189611	5.46451	8.17091	0.0304407	yes
aat-3	F52H2.2	WBGene00000004	chrX	chrX:2554223-2557707	0.702827	22.662	5.01096	0.00147413	yes
abi-1	B0336.6	WBGene00015146	chrIII	chrIII:5690061-5692685	20.6582	68.8227	1.73617	0.0294211	yes
abts-3	F57F10.1	WBGene00019018	chrII	chrII:6136064-6157134	0.0127822	10.3334	9.65897	0.0107553	yes
acdh-10	T08G2.3	WBGene00020366	chrX	chrX:17213084-17214831	0.77101	46.9904	5.92947	0.000982886	yes
acdh-13	C28C12.9	WBGene00001566	chrIV	chrIV:8496472-8498858	274.115	72.5035	-1.91866	0.0242932	yes
acdh-7	T25G12.5	WBGene00020812	chrX	chrX:17214943-17217033	1.34424	46.1845	5.10254	0.000118207	yes
acl-1	F59F4.4	WBGene00010339	chrX	chrX:15849830-15851702	2.88116	24.0042	3.05857	0.0285632	yes
aco-1	ZK455.1	WBGene00000040	chrX	chrX:11339807-11343504	0.733258	7.56324	3.36661	0.0166768	yes
acy-1	F17C8.1	WBGene00000068	chrIII	chrIII:4722176-4730835	0.820426	22.2602	4.76195	5.44e-06	yes
acy-3	C44F1.5	WBGene00000070	chrIII	chrIII:3774875-3781879	0.164046	4.26507	4.7004	0.0464513	yes
adm-2	C04A11.4	WBGene00000074	chrX	chrX:13687902-13695703	0.0548353	28.099	9.0012	0.000570502	yes
adm-4	ZK154.7	WBGene00000075	chrX	chrX:7795030-7798236	0.0198346	7.93318	8.64373	0.0148992	yes
adpr-1	Y73E7A.9	WBGene00044440	chrI	chrI:1610391-1619945	21.2199	1.72864	-3.61771	0.00202188	yes
aha-1	C25A1.11	WBGene00000095	chrI	chrI:10193915-10196990	1.24561	10.9952	3.14195	0.0481307	yes
ain-1	C06G1.4	WBGene00015547	chrX	chrX:16613375-16617594	0.795371	14.1747	4.15554	0.000582807	yes
air-2	B0207.4	WBGene00000099	chrI	chrI:5937478-5938883	174.649	60.7125	-1.52439	0.0353511	yes
akt-2	F28H6.1	WBGene00000103	chrX	chrX:14147630-14152000	0.0126077	15.009	10.2173	0.0112918	yes
alg-1	F48F7.1	WBGene00000105	chrX	chrX:13951192-13956187	0.0883059	12.1732	7.10699	0.00171839	yes
alh-9	F01F1.6	WBGene00000115	chrIII	chrIII:5855993-5859134	134.976	44.5238	-1.60006	0.0205168	yes
amph-1	F58G6.1	WBGene00010272	chrIV	chrIV:9643404-9647856	0.404345	13.0843	5.01611	0.0225025	yes
apa-2	T20B5.1	WBGene00000161	chrX	chrX:9336759-9343006	0.0490412	46.3902	9.88561	1.64e-05	yes
apc-10	F15H10.3	WBGene00000144	chrV	chrV:10425340-10426363	1008.04	324.003	-1.63747	0.01126	yes
apm-3	F53H8.1	WBGene00000164	chrX	chrX:954931-957760	1.5421	242.365	7.29614	2.37e-10	yes
aps-1	F29G9.3	WBGene00000159	chrV	chrV:6017952-6018856	177.762	30.0762	-2.56326	0.00209664	yes
aps-3	Y48G8AL.14	WBGene00000165	chrI	chrI:1155400-1156023	32.8289	4.01121	-3.03286	0.0384505	yes
apy-1	F08C6.6	WBGene00017244	chrX	chrX:7568096-7569675	0.0652207	10.1123	7.27656	0.0398579	yes
aqp-10	ZK1321.3	WBGene00000178	chrII	chrII:9768405-9769793	2.53896	27.0737	3.41458	0.0144747	yes
aqp-2	C01G6.1	WBGene00000170	chrII	chrII:9258991-9261934	3.90283	57.5289	3.88169	0.00167288	yes
arl-8	Y57G11C.13	WBGene00000192	chrIV	chrIV:14798107-14799197	206.264	47.0104	-2.13344	0.0020748	yes
asb-2	F02E8.1	WBGene00000207	chrX	chrX:4469740-4471455	11.3865	115.286	3.33982	1.69e-05	yes
asfl-1	C03D6.5	WBGene00007277	chrI	chrI:9658264-9660064	6.44301	31.0944	2.27085	0.0484206	yes
asg-2	C53B7.4	WBGene00000210	chrX	chrX:6841217-6842042	6.08227	78.2668	3.68572	0.012867	yes
asic-1	ZK770.1	WBGene00022815	chrI	chrI:3769683-3773879	0.0141134	3.25967	7.85152	0.0399599	yes
asp-4	R12H7.2	WBGene00000217	chrX	chrX:13218909-13221400	5.77859	66.3397	3.52108	6.48e-05	yes
C27A7.5	C27A7.5	WBGene00007756	chrV	chrV:12154857-12162280	0.101028	142.617	10.4632	0.00406564	yes
atf-5	T04C10.4	WBGene00000221	chrX	chrX:14809089-14810780	1.11949	27.3185	4.60896	0.00613439	yes
atf-6	F45E6.2	WBGene00000222	chrX	chrX:12480879-12484819	0.0138336	6.23812	8.81679	0.0163092	yes
atg-11	T08A9.1	WBGene00020334	chrX	chrX:7334756-7340143	0.455026	26.64	5.8715	1.07e-06	yes
atg-16.1	F02E8.5	WBGene00017178	chrX	chrX:4459624-4462584	0.127792	6.36192	5.63759	0.0398595	yes
atg-16.2	K06A1.5	WBGene00019427	chrII	chrII:6450997-6453366	1.05985	26.468	4.64231	0.00077903	yes
atg-2	M03A8.2	WBGene00019748	chrX	chrX:6809064-6817168	0.598013	4.09345	2.77507	0.0169563	yes
atg-3	Y55F3AM.4	WBGene00021922	chrIV	chrIV:1010491-1012469	360.761	55.6664	-2.69616	2.14e-05	yes
atg-4.2	ZK792.8	WBGene00014080	chrIV	chrIV:11668011-11671465	2.45267	21.2893	3.1177	0.00812253	yes
atg-9	T22H9.2	WBGene00020706	chrV	chrV:348789-358836	22.0316	3.66556	-2.58747	0.0307039	yes
atgp-2	C38C6.2	WBGene00000225	chrII	chrII:14640022-14644010	0.234045	15.1167	6.01321	0.00970732	yes
atp-3	F27C1.7	WBGene00000230	chrI	chrI:5428545-5429911	839.444	224.551	-1.90239	0.0057361	yes
atx-3	F28F8.6	WBGene00006446	chrV	chrV:15575483-15576981	70.2984	19.1757	-1.87421	0.0235694	yes
bam-2	Y71F9AR.1	WBGene00000237	chrI	chrI:2949610-2957878	10.2738	1.82261	-2.49489	0.0179616	yes
bath-28	F14D2.13	WBGene00017461	chrII	chrII:3343739-3344970	296.362	41.892	-2.82261	0.000140199	yes
bath-3	F59H6.10	WBGene00019140	chrII	chrII:2029329-2030468	113.701	30.7642	-1.88592	0.0174768	yes
bath-35	W02A11.8	WBGene00012196	chrI	chrI:12758513-12759459	60.6662	13.5744	-2.16	0.0285727	yes
bath-36	Y75B12B.4	WBGene00013569	chrV	chrV:15188428-15190909	813.022	189.886	-2.09816	0.00251115	yes
bath-38	F52H3.3	WBGene00009945	chrII	chrII:10042935-10045130	4.62398	102.714	4.47335	9.24e-07	yes
bath-39	F25H9.4	WBGene00009137	chrV	chrV:13459487-13461730	1.67281	31.1759	4.22008	0.00318396	yes
bath-4	F52C6.8	WBGene00018665	chrII	chrII:1916802-1917957	130.983	36.1298	-1.85812	0.0160251	yes
bath-45	F29C12.5	WBGene00009247	chrII	chrII:13122967-13124719	82.9014	11.5763	-2.84022	0.000403541	yes
bath-5	F59H6.11	WBGene00019141	chrII	chrII:2030843-2031943	172.698	40.1682	-2.10413	0.00406564	yes
bed-1	Y39B6A.12	WBGene00012674	chrV	chrV:19119560-19124879	49.5958	5.42881	-3.19151	0.00540412	yes
T12G3.8	T12G3.8	WBGene00000270	chrIV	chrIV:12048245-12051193	299.154	73.604	-2.02303	0.017877	yes
bicd-1	C43G2.2	WBGene00016611	chrIV	chrIV:6565888-6572317	0.190009	7.3308	5.26983	0.0148332	yes
bir-2	C50B8.2	WBGene00000250	chrV	chrV:13568837-13570010	108.682	33.2516	-1.70862	0.0302693	yes
btb-19	F57C2.2	WBGene00010194	chrII	chrII:14521006-14522046	142.34	36.0688	-1.98052	0.00908477	yes
btb-20	F57C2.1	WBGene00010193	chrII	chrII:14522387-14523431	162.44	33.3003	-2.2863	0.00197457	yes
btb-4	F59H6.12	WBGene00019142	chrII	chrII:2032497-2033222	1097.21	241.093	-2.18618	0.000441459	yes
btb-6	F45C12.7	WBGene00018438	chrII	chrII:1715167-1716481	0.0122964	4.68493	8.57365	0.0372882	yes
cab-1	C23H4.1	WBGene00000277	chrX	chrX:12199495-12212981	2.22747	15.0756	2.75873	0.0168784	yes
calu-1	M03F4.7	WBGene00019760	chrX	chrX:4969505-4970880	0.668104	69.0497	6.69142	0.0056791	yes
cam-1	C01G6.8	WBGene00000289	chrII	chrII:9295859-9310244	0.189992	7.59271	5.3206	0.0111271	yes
car-1	Y18D10A.17	WBGene00012484	chrI	chrI:12904459-12906218	40.0271	118.75	1.56888	0.0263743	yes
cas-1	F41G4.2	WBGene00000294	chrX	chrX:16807387-16813600	0.814559	21.9433	4.75162	0.0168751	yes
cav-1	T13F2.8	WBGene00000301	chrIV	chrIV:9772489-9773450	2.21871	27.9622	3.65569	0.0196915	yes
cco-1	F26E4.9	WBGene00000371	chrI	chrI:9788739-9789946	1150.79	181.99	-2.6607	7.57e-06	yes
cco-2	Y37D8A.14	WBGene00012553	chrIII	chrIII:12905387-12906510	499.28	159.07	-1.65019	0.013199	yes
cdc-25.1	K06A5.7	WBGene00000386	chrI	chrI:6469387-6471953	9.54898	34.0976	1.83625	0.0320576	yes
cdc-48.1	C06A1.1	WBGene00007352	chrII	chrII:10559957-10563347	48.5485	166.999	1.78234	0.00567543	yes
cdf-1	C15B12.7	WBGene00000393	chrX	chrX:6499899-6504576	0.709411	11.3821	4.004	0.0163092	yes
cdh-4	F25F2.2	WBGene00000396	chrIII	chrIII:4520426-4536957	0.454178	16.4863	5.18187	8.32e-10	yes
cdl-1	R06F6.1	WBGene00000411	chrII	chrII:10785390-10787215	31.3438	107.266	1.77495	0.0136834	yes
cec-1	ZK1236.2	WBGene00000414	chrIII	chrIII:8426264-8428509	0.414735	43.1447	6.70085	0.00406564	yes
ced-2	Y41D4B.13	WBGene00000416	chrIV	chrIV:1597314-1601620	130.007	36.4241	-1.83562	0.0135118	yes
ceh-20	F31E3.1	WBGene00000443	chrIII	chrIII:6979828-6981733	2.10331	24.2611	3.52791	0.00957553	yes
ceh-21	T26C11.6	WBGene00000444	chrX	chrX:1849625-1852732	0.299262	33.0498	6.78709	0.00187926	yes
ceh-38	F22D3.1	WBGene00000459	chrII	chrII:6951597-6955352	16.7917	57.3975	1.77324	0.0219642	yes
ceh-39	T26C11.7	WBGene00000460	chrX	chrX:1853926-1856166	1.44033	55.4474	5.26665	1.71e-05	yes
ceh-43	C28A5.4	WBGene00000463	chrIII	chrIII:4446609-4449912	0.0266027	11.2085	8.71881	0.0242514	yes
cgef-1	C14A11.3	WBGene00006496	chrX	chrX:2785592-2799235	0.0726774	136.509	10.8752	0.00426733	yes
chd-3	T14G8.1	WBGene00000482	chrX	chrX:12846362-12852531	0.177112	11.4297	6.01199	0.000301024	yes
cids-1	C02F5.4	WBGene00015347	chrIII	chrIII:8244371-8245662	130.546	39.4323	-1.7271	0.0232846	yes
cki-1	T05A6.1	WBGene00000516	chrII	chrII:7811188-7812049	0.277725	11.2125	5.3353	0.0387804	yes
clec-87	C25A1.8	WBGene00007709	chrI	chrI:10184467-10185458	347.051	1742.12	2.32762	0.000237654	yes
clec-88	K10B2.3	WBGene00019606	chrII	chrII:6365705-6366807	193.65	46.3477	-2.06288	0.0172872	yes
clp-6	Y77E11A.10	WBGene00000546	chrIV	chrIV:1429564-1434983	17.7597	2.43031	-2.86939	0.00457579	yes
coel-1	C52B9.3	WBGene00016866	chrX	chrX:4265857-4270525	1.84273	33.2683	4.17423	0.0100956	yes
coh-1	K08A8.3	WBGene00000591	chrX	chrX:7465208-7475249	0.00768808	14.4949	10.8806	1.47e-05	yes
col-38	F54C9.4	WBGene00000615	chrII	chrII:8567983-8569037	1.84836	48.1502	4.70322	0.00112619	yes
col-50	T28F2.6	WBGene00000627	chrI	chrI:3651298-3652602	0	384.523	1.79769e+308	6.99e-05	yes
col-51	T28F2.8	WBGene00000628	chrI	chrI:3653960-3655268	0.0263459	7.86307	8.22137	0.0292021	yes
cpi-2	R01B10.1	WBGene00000534	chrV	chrV:6044044-6051244	275.634	1256.53	2.18862	0.0197004	yes
cpin-1	F38E11.3	WBGene00000775	chrIV	chrIV:9451322-9453250	0.0221588	17.9174	9.65927	0.00912142	yes
cpn-1	F43G9.9	WBGene00000777	chrI	chrI:8636115-8637955	403.985	80.519	-2.3269	0.00024234	yes
crb-1	F11C7.4	WBGene00000792	chrX	chrX:17401497-17413776	0.00848188	2.35588	8.11767	0.0446288	yes
cri-3	F59A2.3	WBGene00010303	chrIII	chrIII:3396572-3397664	346.506	111.127	-1.64067	0.014761	yes
crn-4	AH9.2	WBGene00000797	chrX	chrX:2256081-2258073	0.0145848	16.8103	10.1707	0.00980119	yes
crt-1	Y38A10A.5	WBGene00000802	chrV	chrV:6097087-6100536	34.9017	344.887	3.30476	0.0071069	yes
csb-1	F53H4.1	WBGene00000803	chrX	chrX:15861290-15865843	0.0484178	22.5021	8.86031	0.00200603	yes
csn-3	Y38C1AA.2	WBGene00000815	chrIV	chrIV:194744-202549	86.7848	29.498	-1.55682	0.0391236	yes
csr-1	F20D12.1	WBGene00017641	chrIV	chrIV:7957567-7962109	61.2317	18.3203	-1.74084	0.0163809	yes
cst-1	F14H12.4	WBGene00017472	chrX	chrX:4339619-4343612	0.67617	16.9288	4.64595	0.0243706	yes
cst-2	C24A8.4	WBGene00016038	chrX	chrX:4333125-4336010	0.464523	14.0299	4.91662	0.0145056	yes
ctl-1	Y54G11A.6	WBGene00000830	chrII	chrII:14303483-14306217	70.2002	22.4638	-1.64387	0.0335671	yes
ctl-3	Y54G11A.13	WBGene00013220	chrII	chrII:14307777-14310703	80.061	24.4976	-1.70846	0.0228964	yes
ctns-1	C41C4.7	WBGene00008052	chrII	chrII:8134707-8136866	32.9521	160.226	2.28167	0.00204775	yes
cul-6	K08E7.7	WBGene00000841	chrIV	chrIV:12586486-12590404	0	7.51582	1.79769e+308	0.0168169	yes
cyd-1	Y38F1A.5	WBGene00000870	chrII	chrII:12980521-12993049	0.0667687	4.75506	6.15415	0.0162317	yes
cyn-8	D1009.2	WBGene00000884	chrX	chrX:8911239-8914199	1.33522	91.539	6.09923	0.00452485	yes
cyp-33C8	R08F11.3	WBGene00019967	chrV	chrV:3800770-3803440	0.102042	9.75367	6.57871	0.0384505	yes
daf-19	F33H1.1	WBGene00000914	chrII	chrII:10157464-10169287	0.604727	30.7571	5.66849	0.00827626	yes
daf-3	F25E2.5	WBGene00000899	chrX	chrX:817925-825474	0.605064	11.0089	4.18545	0.0117365	yes
daf-7	B0412.2	WBGene00000903	chrIII	chrIII:811821-813758	0.0491688	15.5732	8.30711	0.0122868	yes
dct-1	C14F5.1	WBGene00015776	chrX	chrX:7954310-7955655	0.422397	26.8006	5.98752	0.0345899	yes
dct-3	C54D10.7	WBGene00008301	chrV	chrV:12437479-12443743	0.563247	62.9557	6.80443	4.09e-06	yes
ddr-2	F11D5.3	WBGene00017381	chrX	chrX:3315308-3324215	0	5.85104	1.79769e+308	0.0205168	yes
F53F10.2	F53F10.2	WBGene00018764	chrI	chrI:3830941-3834125	108.148	34.8564	-1.63352	0.0218923	yes
dhfr-1	C36B1.7	WBGene00007974	chrI	chrI:8736212-8736917	122.341	28.6314	-2.09524	0.023226	yes
dhs-30	T25G12.7	WBGene00000993	chrX	chrX:17230649-17235763	0.0279858	10.9977	8.61829	0.0408405	yes
die-1	C18D1.1	WBGene00000995	chrII	chrII:10061245-10074384	0.0126222	6.59428	9.02911	0.00100084	yes
dif-1	F49E8.5	WBGene00000996	chrIV	chrIV:7551538-7552997	76.7532	21.1589	-1.85896	0.0225717	yes
din-1	F07A11.6	WBGene00008549	chrII	chrII:11614572-11633545	1.2006	29.321	4.61011	0.000161167	yes
djr-1.2	C49G7.11	WBGene00016789	chrV	chrV:4054175-4055094	1.32558	51.3781	5.27646	0.0287948	yes
dkf-2	T25E12.4	WBGene00012019	chrV	chrV:16747536-16788393	27.8141	5.58996	-2.31491	0.00334883	yes
dlg-1	C25F6.2	WBGene00001006	chrX	chrX:5479667-5484904	0.329823	8.58917	4.70276	0.021817	yes
dlk-1	F33E2.2	WBGene00001008	chrI	chrI:12566118-12572791	1.70523	11.6186	2.76839	0.0170623	yes
dmd-6	F13G11.1	WBGene00007058	chrIV	chrIV:14616574-14623930	0.553098	11.4341	4.36967	0.0309621	yes
dnj-1	B0035.14	WBGene00001019	chrIV	chrIV:11298985-11306698	21.845	65.9696	1.5945	0.0481307	yes
dnj-14	K02G10.8	WBGene00001032	chrX	chrX:4707158-4711714	0.841019	17.4776	4.37722	0.0370364	yes
dnj-17	T03F6.2	WBGene00001035	chrIII	chrIII:13390822-13393780	55.0655	14.0036	-1.97535	0.0168784	yes
dnj-26	Y39C12A.8	WBGene00001044	chrIV	chrIV:12251225-12252626	89.7955	27.8385	-1.68956	0.0370364	yes
dnj-7	C55B6.2	WBGene00001025	chrX	chrX:7194520-7198236	1.86709	31.2144	4.06335	0.000231166	yes
dpy-17	F54D8.1	WBGene00001076	chrIII	chrIII:5107288-5108460	3.48014	73.615	4.40278	3.23e-05	yes
dpy-22	F47A4.2	WBGene00001081	chrX	chrX:9810172-9822112	0.336957	17.6804	5.71344	3.36e-09	yes
dpy-23	R160.1	WBGene00001082	chrX	chrX:4389339-4393770	0.930235	51.9764	5.80412	4.01e-06	yes
dpy-27	R13G10.1	WBGene00001086	chrIII	chrIII:3813534-3819661	1.24854	62.5998	5.64785	1.51e-11	yes
dpy-30	ZK863.6	WBGene00001088	chrV	chrV:12191499-12192136	203.344	45.9833	-2.14474	0.00796282	yes
drr-1	F45H10.4	WBGene00009741	chrII	chrII:13494985-13495826	147.463	21.5781	-2.77272	0.00108974	yes
dyf-13	C27H5.7	WBGene00001129	chrII	chrII:7167479-7171263	0.0108842	3.0749	8.14216	0.0411345	yes
dyn-1	C02C6.1	WBGene00001130	chrX	chrX:15568847-15573625	0.436333	34.7886	6.31704	0.000399276	yes
eat-20	H30A04.1	WBGene00001148	chrX	chrX:15516586-15523940	0.377094	9.10437	4.59356	0.0285632	yes
eat-6	B0365.3	WBGene00001137	chrV	chrV:13126391-13129982	85.5826	240.173	1.48868	0.023402	yes
eft-4	R03G5.1	WBGene00001169	chrX	chrX:7823600-7825718	15.3166	295.435	4.26968	0.000653191	yes
egg-1	B0244.8	WBGene00015083	chrIII	chrIII:5728133-5730965	42.0756	8.15444	-2.36733	0.00642364	yes
egg-3	F44F4.2	WBGene00009701	chrII	chrII:10882347-10884402	60.6736	19.9807	-1.60247	0.0411345	yes
egl-1	F23B12.9	WBGene00001170	chrV	chrV:14431294-14432344	0.835302	42.6779	5.67505	0.033708	yes
egl-26	C23H3.1	WBGene00001193	chrII	chrII:69659-71279	0	9.26276	1.79769e+308	0.0328812	yes
egl-30	M01D7.7	WBGene00001196	chrI	chrI:1835680-1841193	137.817	398.464	1.53169	0.0424493	yes
egl-9	F22E12.4	WBGene00001178	chrV	chrV:10468387-10476929	0.0259906	16.5938	9.31844	0.00613439	yes
egrh-2	Y55F3AM.7	WBGene00043705	chrIV	chrIV:988160-990439	45.5254	8.48559	-2.42359	0.046801	yes
ekl-5	Y26E6A.1	WBGene00012512	chrX	chrX:13914799-13917101	0.0472675	7.09481	7.22977	0.00410209	yes
elks-1	F42A6.9	WBGene00018330	chrIV	chrIV:3342522-3350015	0.811676	19.2446	4.56741	0.00021039	yes
elo-1	F56H11.4	WBGene00001239	chrIV	chrIV:9526348-9528333	70.2564	250.635	1.83489	0.00764206	yes
elpc-2	Y111B2A.17	WBGene00013738	chrIII	chrIII:12673575-12686129	120.803	38.7227	-1.64141	0.0148142	yes
emr-1	M01D7.6	WBGene00001309	chrI	chrI:1842446-1843229	255.121	69.7675	-1.87055	0.0119895	yes
enol-1	T21B10.2	WBGene00011884	chrII	chrII:8930922-8933737	24.5512	106.099	2.11155	0.00894015	yes
ent-2	K09A9.3	WBGene00010701	chrX	chrX:15600996-15603695	1.66339	12.9725	2.96325	0.039697	yes
eor-2	C44H4.7	WBGene00001325	chrX	chrX:14602996-14608587	0.0217567	17.4742	9.64955	0.00375424	yes
epn-1	T04C10.2	WBGene00001329	chrX	chrX:14815731-14818438	1.29069	45.219	5.13072	3.04e-05	yes
erd-2	F09B9.3	WBGene00001331	chrX	chrX:10156798-10160379	0.557247	39.0175	6.12966	0.000283346	yes
erp-1	F35A5.8	WBGene00001335	chrX	chrX:3800028-3802751	0.0631584	12.3748	7.61421	0.0122868	yes
ers-3	T07A9.2	WBGene00001338	chrIV	chrIV:388073-390439	415.958	120.063	-1.79264	0.00656201	yes
erv-46	K09E9.2	WBGene00010725	chrX	chrX:15613736-15616453	0.115249	4.44748	5.27016	0.0367322	yes
fat-1	Y67H2A.8	WBGene00001393	chrIV	chrIV:13315617-13318759	78.1924	220.751	1.49732	0.0280018	yes
fat-3	W08D2.4	WBGene00001395	chrIV	chrIV:9803005-9806101	1.89724	26.0258	3.77796	0.00282206	yes
fat-6	VZK822L.1	WBGene00001398	chrIV	chrIV:11913667-11915773	0.399486	10.8698	4.76603	0.0276355	yes
fbp-1	K07A3.1	WBGene00001404	chrI	chrI:2580942-2586128	103.05	14.8313	-2.79663	0.000178499	yes
fbxa-106	Y59A8B.11	WBGene00013348	chrV	chrV:18082406-18083417	311.227	106.021	-1.55362	0.0241673	yes
fbxa-107	Y37H2A.4	WBGene00012564	chrV	chrV:18123948-18125138	415.316	109.083	-1.92878	0.00295377	yes
fbxa-108	F59A1.7	WBGene00010293	chrV	chrV:17656924-17658137	225.501	69.9012	-1.68974	0.0168751	yes
fbxa-120	C33E10.2	WBGene00016346	chrX	chrX:17302677-17303755	1.17789	25.1641	4.41709	0.0140333	yes
fbxa-125	B0511.3	WBGene00015229	chrI	chrI:10646750-10647766	0.252998	39.5367	7.28792	0.00868031	yes
fbxa-129	F59A1.8	WBGene00010294	chrV	chrV:17655554-17656628	95.4631	21.8052	-2.13027	0.0130473	yes
fbxa-13	Y22D7AR.11	WBGene00021264	chrIII	chrIII:1703537-1705477	14.0325	81.0963	2.53086	0.00718823	yes
fbxa-153	B0391.5	WBGene00007162	chrV	chrV:15605710-15610361	0.279799	17.9194	6.00099	0.0319215	yes
fbxa-193	F59A1.9	WBGene00010295	chrV	chrV:17653455-17655255	83.1563	22.9011	-1.86041	0.0268218	yes
fbxa-211	Y37H2A.6	WBGene00012566	chrV	chrV:18127304-18128853	84.2856	12.031	-2.80853	0.000474905	yes
fbxa-216	Y47H9C.10	WBGene00012953	chrI	chrI:11901598-11903161	18.6007	2.32298	-3.00131	0.0180573	yes
fbxa-3	T08E11.7	WBGene00020363	chrII	chrII:1818963-1820008	2.57271	52.4344	4.34915	0.00440949	yes
fbxa-90	Y102A5C.19	WBGene00013623	chrV	chrV:16966861-16968561	0.956339	50.8757	5.73331	0.00147456	yes
fbxa-94	F28F8.8	WBGene00009225	chrV	chrV:15572914-15574087	310.504	96.4032	-1.68746	0.0120319	yes
fbxa-95	F28F8.4	WBGene00009222	chrV	chrV:15571469-15572650	711.788	126.527	-2.492	4.32e-05	yes
fbxb-7	Y20C6A.2	WBGene00012492	chrV	chrV:17377396-17379201	0	13.2901	1.79769e+308	0.0286941	yes
fbxb-8	F49B2.1	WBGene00009861	chrI	chrI:14298742-14299751	0.01413	6.80226	8.91111	0.0304462	yes
fbxc-36	R07C3.2	WBGene00019918	chrII	chrII:941020-943115	0	41.9408	1.79769e+308	0.00452485	yes
fbxc-45	Y54G2A.22	WBGene00021887	chrIV	chrIV:2919860-2922227	98.2008	32.1115	-1.61265	0.0449582	yes
fbxc-50	C17F4.5	WBGene00015912	chrII	chrII:3246323-3248122	16.8718	89.4901	2.40711	0.00613439	yes
fbxc-54	F23F1.3	WBGene00017744	chrII	chrII:31767-33604	3.91987	36.5838	3.22233	0.00644114	yes
fer-1	F43G9.6	WBGene00001414	chrI	chrI:8623010-8631178	0.0491529	8.19349	7.38106	0.000398658	yes
fhod-1	C46H11.11	WBGene00016735	chrI	chrI:5058253-5068832	0.484863	7.94782	4.03491	0.00504601	yes
fkh-4	C29F7.5	WBGene00001436	chrX	chrX:13427129-13431528	0.00514116	1.90035	8.52996	0.0409719	yes
flh-2	C26E6.2	WBGene00016138	chrIII	chrIII:4952085-4955076	0.6736	25.9331	5.26676	0.000446516	yes
flh-3	Y11D7A.13	WBGene00012436	chrIV	chrIV:9270079-9271601	0	10.4789	1.79769e+308	0.0299213	yes
flt-1	ZK783.4	WBGene00001470	chrIII	chrIII:7650501-7655967	0.0605902	2.94678	5.60391	0.0168751	yes
fmo-5	H24K24.5	WBGene00001480	chrV	chrV:899316-903580	3.21464	25.5051	2.98806	0.0100503	yes
frm-2	T04C9.6	WBGene00001489	chrIII	chrIII:5976732-5982077	0.0828925	11.0779	7.06223	0.00892808	yes
frm-7	C51F7.1	WBGene00001493	chrV	chrV:12302464-12306953	0.207043	6.62622	5.00018	0.0326581	yes
ftt-2	F52D10.3	WBGene00001502	chrX	chrX:11603643-11605354	3.62643	170.765	5.55732	1.95e-08	yes
K10C2.4	K10C2.4	WBGene00019620	chrX	chrX:6444151-6448962	0.63543	64.9646	6.67578	0.000141154	yes
gap-3	Y20F4.3	WBGene00021238	chrI	chrI:1988725-2010482	13.3464	1.77782	-2.90827	0.00569102	yes
gar-2	F47D12.1	WBGene00001518	chrIII	chrIII:6309325-6320793	0.0163915	8.79127	9.06698	0.012651	yes
gas-1	K09A9.5	WBGene00001520	chrX	chrX:15586745-15590329	3.02913	133.742	5.46441	1.03e-09	yes
gbh-1	D2089.5	WBGene00001522	chrII	chrII:10690396-10693752	0.564561	39.603	6.13234	0.00291721	yes
gck-4	C04A11.3	WBGene00007287	chrX	chrX:13677189-13682008	0.164707	11.0964	6.07405	0.00528785	yes
gei-12	F52D2.4	WBGene00001569	chrX	chrX:1986517-1989599	0.0955163	9.81757	6.68347	0.00282206	yes
gei-8	C14B9.6	WBGene00001565	chrIII	chrIII:8108723-8125409	0.165201	25.7288	7.28302	0.000490864	yes
gex-2	F56A11.1	WBGene00001579	chrIV	chrIV:572722-583731	0.621502	5.39936	3.11896	0.038425	yes
gfi-3	M163.4	WBGene00001583	chrX	chrX:14480501-14484586	0.919049	49.6244	5.75476	5.43e-07	yes
git-1	F14F3.2	WBGene00008805	chrX	chrX:10524835-10529164	0.050895	12.8883	7.98432	0.0418752	yes
gla-3	T02E1.3	WBGene00011376	chrI	chrI:8211104-8218318	87.3465	22.4313	-1.96123	0.0111223	yes
glb-1	ZK637.13	WBGene00014030	chrIII	chrIII:8922320-8923220	0.849039	65.4082	6.2675	0.0130473	yes
glit-1	F55D10.3	WBGene00018878	chrX	chrX:4712249-4715049	1.04829	10.0923	3.26715	0.0171812	yes
gln-5	F26D10.10	WBGene00001606	chrIV	chrIV:17272219-17273615	130.231	15.307	-3.08881	2.09e-05	yes
gln-6	C28D4.3	WBGene00001607	chrIV	chrIV:9739306-9740878	147.484	38.966	-1.92027	0.00557327	yes
glr-6	F41B4.4	WBGene00001617	chrX	chrX:6836345-6840575	0.0383337	8.16925	7.73545	0.00454457	yes
gly-10	Y45F10D.3	WBGene00001635	chrIV	chrIV:13778841-13782337	89.2633	321.081	1.8468	0.0305132	yes
gly-3	ZK688.8	WBGene00001628	chrIII	chrIII:7914250-7917704	28.9019	97.2903	1.75113	0.0129334	yes
gly-6	H38K22.5	WBGene00001631	chrIII	chrIII:4324259-4331200	0.208159	10.8621	5.70548	0.0488379	yes
gna-2	T23G11.2	WBGene00001647	chrI	chrI:7699540-7700958	77.3087	22.8361	-1.75932	0.0299213	yes
gosr-2.2	CBG09355	WBGene00030954	chrV	chrV:5618332-5620124	275.94	77.9114	-1.82445	0.00977977	yes
gpd-2	K10B3.8	WBGene00001684	chrX	chrX:3113423-3116586	1.05937	39.8454	5.23313	7.03e-05	yes
gpd-3	K10B3.7	WBGene00001685	chrX	chrX:3112096-3113372	4.44253	36.6801	3.04555	0.00536097	yes
gpdh-2	K11H3.1	WBGene00010778	chrIII	chrIII:9853989-9859095	23.289	96.1955	2.04632	0.0367322	yes
gpr-2	C38C10.4	WBGene00001689	chrIII	chrIII:9391185-9393080	84.5161	28.0902	-1.58916	0.0322224	yes
grk-1	F19C6.1	WBGene00001708	chrX	chrX:9991223-9999120	0.00399338	5.84142	10.5145	0.00692705	yes
gska-3	C36B1.10	WBGene00007977	chrI	chrI:8749659-8751363	1.88236	51.0037	4.75999	0.000219503	yes
gst-10	Y45G12C.2	WBGene00001758	chrV	chrV:2561688-2564700	0.340788	31.8281	6.54528	0.00406564	yes
gst-24	F37B1.1	WBGene00001772	chrII	chrII:13610375-13611272	0.111055	17.1099	7.26742	0.00680493	yes
gst-38	F35E8.8	WBGene00001786	chrV	chrV:15915230-15916060	0.371088	39.6891	6.74084	0.0180893	yes
gst-7	F11G11.2	WBGene00001755	chrII	chrII:4882065-4883355	4.82486	520.273	6.75264	5.25e-11	yes
haf-6	Y48G8AL.11	WBGene00001816	chrI	chrI:1162891-1175871	66.8306	19.4386	-1.78159	0.0147076	yes
haf-7	Y50E8A.16	WBGene00001817	chrV	chrV:14773347-14777316	0.0185489	3.1972	7.42933	0.0474235	yes
ham-1	F53B2.6	WBGene00001820	chrIV	chrIV:12542010-12545701	0.677414	12.8245	4.24272	0.0162317	yes
har-1	C16C10.11	WBGene00007630	chrIII	chrIII:4152025-4152875	120.348	26.1983	-2.19966	0.0107553	yes
hbl-1	F13D11.2	WBGene00001824	chrX	chrX:5823032-5827705	0.0685736	8.98503	7.03373	0.0253922	yes
hda-4	C10E2.3	WBGene00001837	chrX	chrX:16729485-16744625	0.0823441	5.27523	6.00143	0.0179466	yes
hex-3	Y39A1C.4	WBGene00012663	chrIII	chrIII:10849153-10854462	25.2383	4.23056	-2.5767	0.00569102	yes
hil-1	C30G7.1	WBGene00001852	chrV	chrV:14949759-14952733	0.397338	31.1197	6.29132	0.0219983	yes
hil-2	Y73B6BL.9	WBGene00001853	chrIV	chrIV:6294114-6295199	5.88901	207.904	5.14175	0.000184933	yes
hil-3	F22F1.1	WBGene00001854	chrX	chrX:8159104-8160035	1.75442	27.6428	3.97784	0.014001	yes
him-3	ZK381.1	WBGene00001862	chrIV	chrIV:6977507-6978747	216.783	52.887	-2.03527	0.00282206	yes
him-5	D1086.4	WBGene00001864	chrV	chrV:14090798-14092417	542.506	75.4066	-2.84688	3.78e-06	yes
his-24	M163.3	WBGene00001898	chrX	chrX:14490036-14491041	4.06786	25.7296	2.66109	0.0411261	yes
his-32	F17E9.10	WBGene00001906	chrIV	chrIV:8334284-8334752	0.721108	122.663	7.41027	0.000474591	yes
his-37	C50F4.7	WBGene00001911	chrV	chrV:9547058-9547579	217.588	1337.57	2.61995	2.5e-05	yes
his-46	B0035.9	WBGene00001920	chrIV	chrIV:11338499-11338811	187.671	866.3	2.20666	0.00366268	yes
his-5	F45F2.3	WBGene00001879	chrV	chrV:8535181-8535560	7.01159	70.2628	3.32495	0.0474366	yes
his-56	F54E12.3	WBGene00001930	chrIV	chrIV:11325995-11326307	179.657	861.203	2.26111	0.00297936	yes
his-57	F54E12.5	WBGene00001931	chrIV	chrIV:11340389-11340773	18.5632	123.167	2.7301	0.0256638	yes
his-60	F55G1.11	WBGene00001934	chrIV	chrIV:7487555-7487986	28.5043	388.241	3.7677	1.42e-05	yes
his-64	F22B3.1	WBGene00001938	chrIV	chrIV:11407093-11407474	120.83	488.225	2.01457	0.00938104	yes
hke-4.2	H13N06.5	WBGene00006494	chrX	chrX:15505966-15507812	2.0821	55.8897	4.74647	3.15e-05	yes
hmg-1.2	F47D12.4	WBGene00001972	chrIII	chrIII:6280331-6282365	67.6081	486.533	2.84727	8.11e-06	yes
hnd-1	C44C10.8	WBGene00001981	chrX	chrX:11684660-11685579	2.83233	255.659	6.49608	1.25e-05	yes
hpk-1	F20B6.8	WBGene00001994	chrX	chrX:4210558-4217266	1.41199	105.882	6.22858	4.64e-07	yes
hrg-1	R02E12.6	WBGene00019830	chrX	chrX:4008037-4022187	0	44.7723	1.79769e+308	0.0370765	yes
hrp-1	F42A6.7	WBGene00001999	chrIV	chrIV:3336923-3338864	1969.72	638.669	-1.62485	0.0457715	yes
hsp-12.3	F38E11.1	WBGene00002012	chrIV	chrIV:9444880-9445262	4.46564	757.831	7.40687	2.14e-05	yes
hsp-12.6	F38E11.2	WBGene00002013	chrIV	chrIV:9446367-9446867	0	78.9959	1.79769e+308	0.0326581	yes
hsp-16.1	T27E4.8	WBGene00002015	chrV	chrV:9090075-9090633	189.202	846.982	2.16241	0.013579	yes
hsp-16.2	Y46H3A.3	WBGene00002016	chrV	chrV:1804439-1804970	24.9116	313.601	3.65404	3.92e-05	yes
hsp-16.41	Y46H3A.2	WBGene00002018	chrV	chrV:1805231-1805874	50.0688	494.303	3.30341	4.98e-06	yes
hsp-16.48	T27E4.3	WBGene00002019	chrV	chrV:9089257-9089744	789.369	3175.65	2.00828	0.00156942	yes
hsp-3	C15H9.6	WBGene00002007	chrX	chrX:6088979-6092089	9.28364	234.9	4.66121	0	yes
hsp-6	C37H5.8	WBGene00002010	chrV	chrV:4824082-4826746	101.656	21.7702	-2.22328	0.000806223	yes
hsp-70	C12C8.1	WBGene00002026	chrI	chrI:9317727-9327204	7.62882	105.279	3.78661	2.55e-07	yes
hst-2	C34F6.4	WBGene00002029	chrX	chrX:11204082-11207026	0.197402	61.4991	8.28329	0.00202188	yes
hus-1	H26D21.1	WBGene00002042	chrI	chrI:3698109-3699303	180.149	59.6131	-1.59549	0.0318875	yes
hyl-2	K02G10.6	WBGene00002044	chrX	chrX:4696756-4699433	0.161508	22.5774	7.12713	0.011744	yes
ida-1	B0244.2	WBGene00002048	chrIII	chrIII:5755492-5765769	0.664039	8.74339	3.71885	0.0135118	yes
ife-2	R04A9.4	WBGene00002060	chrX	chrX:381408-382710	0	26.5511	1.79769e+308	0.0145056	yes
iff-1	T05G5.10	WBGene00002064	chrIII	chrIII:9745779-9747108	1390.72	268.289	-2.37397	6.07e-05	yes
ile-2	T04G9.3	WBGene00002071	chrX	chrX:768594-770771	0.159779	32.9409	7.68765	0.00140903	yes
immp-1	C24H11.6	WBGene00007021	chrIII	chrIII:11775015-11776485	257.917	28.9311	-3.15622	0.0010385	yes
immt-1	T14G11.3	WBGene00020511	chrX	chrX:2682817-2687176	0.732983	42.3258	5.85161	4.45e-06	yes
immt-2	W06H3.1	WBGene00012315	chrV	chrV:16789307-16794985	393.863	133.936	-1.55615	0.0391236	yes
ina-1	F54G8.3	WBGene00002081	chrIII	chrIII:9167961-9172724	0.12961	5.2935	5.35197	0.0283153	yes
inx-12	ZK770.3	WBGene00002134	chrI	chrI:3755473-3759076	0.226328	35.6797	7.30054	0.00200269	yes
inx-13	Y8G1A.2	WBGene00002135	chrI	chrI:3748537-3753961	0.00808858	21.3865	11.3685	0.00284192	yes
inx-2	F08G12.10	WBGene00002124	chrX	chrX:11294897-11296667	0.0249832	32.2929	10.336	4.84e-05	yes
inx-3	F22F4.2	WBGene00002125	chrX	chrX:5996120-5998208	0.224898	16.8951	6.23119	0.00478765	yes
isl-1	R10H1.4	WBGene00023416	chrII	chrII:7496266-7497317	1.22887	29.244	4.57274	0.0398462	yes
Y17G9B.4	Y17G9B.4	WBGene00021201	chrIV	chrIV:4752110-4753155	788.978	278.945	-1.5	0.021817	yes
kgb-1	T07A9.3	WBGene00002187	chrIV	chrIV:405682-410026	0.388504	10.0302	4.69027	0.0498374	yes
kin-20	F46F2.2	WBGene00002203	chrX	chrX:15269056-15281557	0.087173	15.4481	7.46933	0.0445937	yes
kin-25	B0302.1	WBGene00002207	chrX	chrX:17186305-17193214	0.389752	23.1008	5.88924	0.0013684	yes
kin-29	F58H12.1	WBGene00002210	chrX	chrX:2843920-2852471	0.33725	6.97012	4.36929	0.0172872	yes
klp-20	Y50D7A.6	WBGene00002230	chrIII	chrIII:221414-228835	13.6128	1.57739	-3.10935	0.00841015	yes
klp-8	C15C7.2	WBGene00002220	chrX	chrX:3159929-3164414	3.85421	51.2772	3.73381	1.64e-05	yes
lam-3	T22A3.8	WBGene00002248	chrI	chrI:10608454-10621417	0.00713246	0.593717	6.37923	0.0396933	yes
ldb-1	F58A3.1	WBGene00002261	chrX	chrX:11028850-11040546	0.0227971	12.2648	9.07145	0.00812253	yes
lec-1	W09H1.6	WBGene00002264	chrII	chrII:13195478-13199408	71.8241	320.714	2.15875	0.00326278	yes
lec-4	C44F1.3	WBGene00002267	chrIII	chrIII:3771402-3773315	1.16017	958.433	9.6902	2.84e-12	yes
let-19	K08F8.6	WBGene00002295	chrII	chrII:8770919-8781966	0.239804	10.2242	5.41399	1.09e-05	yes
let-2	F01G12.5	WBGene00002280	chrX	chrX:16380527-16389419	2.37501	19.9348	3.06929	0.00603591	yes
lfe-2	C46H11.4	WBGene00002979	chrI	chrI:5027154-5041149	5.72487	63.4868	3.47114	0.00348994	yes
lin-10	C09H6.2	WBGene00002999	chrI	chrI:8109740-8119309	0.624745	8.7682	3.81094	0.0345899	yes
lin-15A	ZK678.1	WBGene00023498	chrX	chrX:15731899-15735318	3.13279	27.4827	3.133	0.00167445	yes
lin-15B	ZK662.4	WBGene00023497	chrX	chrX:15726060-15731788	4.13107	50.5857	3.61414	3.49e-07	yes
lin-33	H32C10.2	WBGene00003019	chrIV	chrIV:5930632-5933253	0.147229	6.83178	5.53612	0.0398579	yes
lin-41	C12C8.3	WBGene00003026	chrI	chrI:9335956-9342488	12.3119	62.7485	2.34953	0.000653191	yes
lin-44	E01A2.3	WBGene00003029	chrI	chrI:4126057-4129309	9.86585	58.7567	2.57424	0.0393437	yes
lin-59	T12F5.4	WBGene00003040	chrI	chrI:3713520-3721160	2.03415	42.3314	4.37923	4.98e-08	yes
lin-66	B0513.1	WBGene00001562	chrIV	chrIV:13888063-13893954	0.418967	15.1183	5.17332	0.000551756	yes
lin-7	Y54G11A.10	WBGene00002996	chrII	chrII:14347085-14349330	77.3434	19.5296	-1.98562	0.0208222	yes
lmp-1	C03B1.12	WBGene00003053	chrX	chrX:6376400-6377651	0.848563	57.8983	6.09236	0.0010385	yes
lnp-1	C05E11.1	WBGene00015492	chrX	chrX:4588740-4590419	0.953387	62.706	6.0394	4.84e-05	yes
lntl-1	C31H1.6	WBGene00016289	chrIV	chrIV:5800334-5807082	3.91027	47.7186	3.60921	0.037218	yes
lpd-9	T21C9.5	WBGene00003065	chrV	chrV:10579285-10580664	59.975	11.8625	-2.33796	0.0458796	yes
lpr-3	W04G3.8	WBGene00012261	chrX	chrX:11057369-11059728	0.0180687	2.80422	7.27796	0.014915	yes
lrk-1	T27C10.6	WBGene00003068	chrI	chrI:10879765-10894230	0.782348	6.89936	3.14058	0.0457056	yes
lrp-1	F29D11.1	WBGene00003071	chrI	chrI:7614171-7634135	0.091247	1.27351	3.80289	0.0191243	yes
lrp-2	T21E3.3	WBGene00003072	chrI	chrI:3935283-3953945	0.338296	3.48681	3.36555	0.0018329	yes
lsd-1	T08D10.2	WBGene00011615	chrX	chrX:11948783-11951825	0.825985	40.1541	5.60329	5.12e-05	yes
lsm-1	F40F8.9	WBGene00003076	chrII	chrII:11126891-11127454	70.4696	11.274	-2.644	0.0245041	yes
lst-2	R160.7	WBGene00003084	chrX	chrX:4378004-4383341	0.0168356	7.78021	8.85215	0.0122868	yes
lsy-2	F49H12.1	WBGene00003087	chrX	chrX:2089659-2093240	25.2453	173.081	2.77736	0.0021513	yes
mab-20	Y71G12B.20	WBGene00003111	chrI	chrI:1644589-1651382	6.95729	156.38	4.49039	4.1e-08	yes
mab-3	Y53C12B.5	WBGene00003100	chrII	chrII:9733362-9737952	0.193393	22.299	6.8493	0.0169898	yes
mab-7	ZC13.4	WBGene00003104	chrX	chrX:892239-898068	0.0467627	9.44789	7.65849	0.0351873	yes
madf-1	Y55F3BR.5	WBGene00021942	chrIV	chrIV:830390-831896	109.166	18.6832	-2.54671	0.00314064	yes
magi-1	K01A6.2	WBGene00010444	chrIV	chrIV:11713978-11729256	0.448345	12.4182	4.7917	0.000781538	yes
mai-2	B0546.1	WBGene00015248	chrIV	chrIV:3385906-3386901	88.8181	14.1839	-2.6466	0.0187098	yes
ZC506.1	ZC506.1	WBGene00013919	chrX	chrX:9958903-9964677	0.011999	11.4641	9.9	0.0128638	yes
max-1	C34B4.1	WBGene00003143	chrV	chrV:13098899-13110322	0.0311618	3.45611	6.79322	0.0471667	yes
mbf-1	H21P03.1	WBGene00003148	chrIV	chrIV:11479342-11480163	771.654	102.312	-2.91498	3.18e-06	yes
mbk-1	T04C10.1	WBGene00003149	chrX	chrX:14819842-14824471	1.27199	44.2339	5.12	4.73e-07	yes
mbtr-1	Y48G1A.6	WBGene00021661	chrI	chrI:343117-348367	119.195	27.2904	-2.12685	0.0253922	yes
mca-1	W09C2.3	WBGene00003151	chrIV	chrIV:9625892-9634931	0.439036	6.66361	3.92389	0.00659275	yes
mcm-3	C25D7.6	WBGene00003155	chrV	chrV:15056271-15059582	44.5809	138.296	1.63326	0.0190171	yes
mdl-1	R03E9.1	WBGene00003163	chrX	chrX:6742353-6743863	4.47957	48.3017	3.43064	0.00111329	yes
mec-6	W02D3.3	WBGene00003170	chrI	chrI:6724917-6729377	1.5195	16.6179	3.45107	0.0155177	yes
meg-1	K02B9.1	WBGene00010492	chrX	chrX:13926973-13929563	0.101639	4.4773	5.4611	0.0384505	yes
meg-2	K02B9.2	WBGene00010493	chrX	chrX:13923003-13926051	0.00911988	2.78786	8.25593	0.0370364	yes
mek-1	K08A8.1	WBGene00003185	chrX	chrX:7479202-7480965	1.17457	121.45	6.69209	8.03e-08	yes
mes-1	F54F7.5	WBGene00003219	chrX	chrX:11857425-11862305	0.0189648	16.5613	9.77027	0.00263887	yes
mif-1	Y56A3A.3	WBGene00003234	chrIII	chrIII:11848051-11849410	399.033	69.132	-2.52908	0.000468314	yes
misc-1	B0432.4	WBGene00015186	chrII	chrII:286632-288695	35.7162	7.11167	-2.32832	0.0206421	yes
miz-1	R13.4	WBGene00011259	chrIV	chrIV:10812388-10825928	0.574985	18.8745	5.03677	0.000322675	yes
mlt-4	ZC15.7	WBGene00013835	chrV	chrV:20281359-20289386	0.0497766	2.81518	5.82162	0.0317294	yes
mlt-7	ZK430.8	WBGene00022743	chrII	chrII:4392950-4404856	0.0399869	7.74446	7.59749	0.0193247	yes
mmab-1	C26E6.11	WBGene00016144	chrIII	chrIII:4920396-4921711	88.7351	25.4257	-1.80322	0.036472	yes
mnk-1	R166.5	WBGene00011304	chrII	chrII:10542384-10554984	14.3593	57.3026	1.99662	0.00693593	yes
mnp-1	B0285.7	WBGene00007139	chrIII	chrIII:4356510-4364944	0.866114	9.19813	3.40871	0.0122868	yes
T19B4.1	T19B4.1	WBGene00020556	chrI	chrI:5702158-5705556	0.0198873	5.30439	8.0592	0.0307133	yes
mop-25.1	R02E12.2	WBGene00019827	chrX	chrX:4008037-4022187	0.00562944	17.5099	11.6029	0.0278632	yes
mppa-1	Y71G12B.24	WBGene00022159	chrI	chrI:1721593-1751057	60.7769	9.30896	-2.70683	0.00211283	yes
mrp-5	F14F4.3	WBGene00003411	chrX	chrX:14938442-14946247	0.975019	28.6021	4.87455	9.41e-06	yes
msh-5	F09E8.3	WBGene00003421	chrIV	chrIV:13155203-13164028	169.094	58.2142	-1.53839	0.0162317	yes
msi-1	R10E9.1	WBGene00003423	chrIII	chrIII:3964636-3976377	0.069026	25.1696	8.51032	8.49e-05	yes
mtm-5	H28G03.6	WBGene00003477	chrX	chrX:5234664-5243357	0.0178827	2.97252	7.37698	0.0245783	yes
mtss-1	PAR2.1	WBGene00019800	chrIII	chrIII:8768227-8769158	93.3941	16.8516	-2.47044	0.0113547	yes
mup-4	K07D8.1	WBGene00003497	chrIII	chrIII:7479618-7489010	0.108576	5.32293	5.61544	0.00260472	yes
mut-14	C14C11.6	WBGene00003507	chrV	chrV:5658759-5660688	47.2417	8.97719	-2.39572	0.00392708	yes
mxl-2	F40G9.11	WBGene00003510	chrIII	chrIII:187012-188130	100.682	28.2373	-1.83413	0.0471667	yes
mys-3	R07B5.9	WBGene00045419	chrV	chrV:9849558-9856295	378.283	145.896	-1.37453	0.04228	yes
mys-4	C34B7.4	WBGene00007914	chrI	chrI:8333146-8336014	79.6426	22.4616	-1.82608	0.0120619	yes
nck-1	ZK470.5	WBGene00006410	chrX	chrX:4148632-4153419	1.15245	239.269	7.69778	2.24e-05	yes
ncx-3	ZC168.1	WBGene00003568	chrIV	chrIV:10716635-10721735	0.0893562	2.72977	4.93307	0.0492121	yes
ndx-4	Y37H9A.6	WBGene00003581	chrI	chrI:13792632-13794140	529.148	139.99	-1.91835	0.00649357	yes
ned-8	F45H11.2	WBGene00003587	chrI	chrI:10373360-10373850	132.606	26.9447	-2.29907	0.0293688	yes
nekl-2	ZC581.1	WBGene00022631	chrI	chrI:6663143-6665160	0.0954445	14.9412	7.29042	0.0272615	yes
nfya-1	T08D10.1	WBGene00011614	chrX	chrX:11944360-11946766	0.849911	25.3268	4.89721	0.00366268	yes
nhr-154	C13C4.2	WBGene00007547	chrV	chrV:12101286-12103267	0.0265064	15.3466	9.17736	0.0115678	yes
nhr-183	F41B5.10	WBGene00018266	chrV	chrV:2262554-2264540	0.0229086	10.1824	8.79597	0.0225025	yes
nhr-20	F43C1.4	WBGene00003619	chrIII	chrIII:4230406-4233192	0.616901	12.2135	4.30729	0.0159897	yes
nhr-206	R07B7.13	WBGene00011097	chrV	chrV:12092025-12093842	0	20.9052	1.79769e+308	0.00764206	yes
nhr-207	R07B7.14	WBGene00011098	chrV	chrV:12096214-12097826	0	14.199	1.79769e+308	0.0252784	yes
nhr-256	ZK697.2	WBGene00022805	chrV	chrV:1743813-1747880	2.29104	22.9149	3.32221	0.0139383	yes
nhr-34	F58G6.5	WBGene00003627	chrIV	chrIV:9664347-9675655	0	15.9124	1.79769e+308	0.0123674	yes
nhr-46	C45E5.6	WBGene00003636	chrIV	chrIV:5747374-5757851	0.0623415	7.48058	6.90681	0.0310906	yes
nhr-47	C24G6.4	WBGene00003637	chrV	chrV:5505279-5513814	1.09792	26.6436	4.60094	0.0133914	yes
nhr-57	T05B4.2	WBGene00003647	chrV	chrV:4131909-4134930	0.782685	58.7874	6.23093	5.85e-05	yes
nhr-61	W01D2.2	WBGene00003651	chrII	chrII:14815441-14818465	123.452	40.6396	-1.603	0.0471667	yes
nhr-85	W05B5.3	WBGene00003675	chrI	chrI:13056079-13062111	0.0069763	4.37002	9.29096	0.0214457	yes
nhr-86	Y40B10A.8	WBGene00003676	chrV	chrV:2061131-2066843	94.1243	17.8506	-2.39859	0.00142687	yes
nhx-5	F57C7.2	WBGene00003733	chrX	chrX:10576897-10580992	0.0599847	12.1978	7.66781	0.0126359	yes
nipi-3	K09A9.1	WBGene00010700	chrX	chrX:15607900-15611743	1.08272	32.3646	4.90169	8.25e-07	yes
F44E7.2	F44E7.2	WBGene00018424	chrV	chrV:5770437-5771750	1.5058	17.7431	3.55866	0.0448892	yes
nkat-3	R03A10.4	WBGene00010984	chrX	chrX:15441661-15443572	2.5774	18.2065	2.82046	0.0279403	yes
nmy-1	F52B10.1	WBGene00003776	chrX	chrX:2909545-2918026	0.294543	7.06015	4.58315	0.00147456	yes
nos-1	R03D7.7	WBGene00003783	chrII	chrII:10951818-10953105	101.009	0.925818	-6.76954	1.17e-06	yes
nrde-3	R04A9.2	WBGene00019862	chrX	chrX:372235-376898	0.0587172	18.3608	8.28863	0.000764476	yes
nucb-1	F44A6.1	WBGene00009674	chrX	chrX:10197645-10200344	0.0474603	21.8684	8.84791	0.0120013	yes
obr-2	F14H8.1	WBGene00008832	chrV	chrV:15011859-15014205	1.81831	32.0371	4.13907	0.00167167	yes
ooc-5	C18E9.11	WBGene00003870	chrII	chrII:8993106-8994471	215.352	40.7301	-2.40253	0.000494566	yes
osm-1	T27B1.1	WBGene00003883	chrX	chrX:16541256-16551140	0.163046	4.38341	4.7487	0.00681091	yes
pab-2	F18H3.3	WBGene00003903	chrX	chrX:13522197-13527345	4.47825	108.937	4.60441	1.56e-06	yes
pan-1	M88.6	WBGene00003915	chrIII	chrIII:4562705-4566240	3.19544	44.6837	3.80566	0.000941806	yes
par-4	Y59A8B.14	WBGene00003919	chrV	chrV:18098647-18106840	17.263	4.39251	-1.97457	0.0425745	yes
pat-6	T21D12.4	WBGene00003932	chrIV	chrIV:261891-264232	0.462388	24.8989	5.75084	0.0121658	yes
pcca-1	F27D9.5	WBGene00017864	chrX	chrX:7657486-7660935	2.15269	134.999	5.97067	8.81e-12	yes
pccb-1	F52E4.1	WBGene00018701	chrX	chrX:3089485-3094362	3.20718	75.4921	4.55695	3.92e-07	yes
pcm-1	C10F3.5	WBGene00003954	chrV	chrV:5960567-5969137	2.8654	327.385	6.83611	1.26e-05	yes
pdi-2	C07A12.4	WBGene00003963	chrX	chrX:4524158-4526507	12.0221	444.272	5.20768	2.99e-10	yes
pdk-1	H42K12.1	WBGene00003965	chrX	chrX:1321347-1327980	1.10483	8.71674	2.97996	0.0320901	yes
pek-1	F46C3.1	WBGene00003970	chrX	chrX:11410118-11414747	2.66687	45.2435	4.08449	2.06e-07	yes
pfd-4	B0035.4	WBGene00007107	chrIV	chrIV:11315182-11315855	112.606	29.4137	-1.93672	0.0444448	yes
pfn-1	Y18D10A.20	WBGene00003989	chrI	chrI:12921992-12923535	37.0231	122.81	1.72994	0.0434503	yes
pgp-1	K08E7.9	WBGene00003995	chrIV	chrIV:12591672-12599146	0.167122	3.93373	4.55692	0.0403522	yes
phb-1	Y37E3.9	WBGene00004014	chrI	chrI:2071354-2072552	234.927	88.7503	-1.40439	0.0471667	yes
Y71H10A.1	Y71H10A.1	WBGene00022199	chrX	chrX:2940861-2945470	35.6955	379.495	3.41027	1.89e-08	yes
pif-1	Y18H1A.6	WBGene00004028	chrI	chrI:720013-731077	174.178	64.531	-1.4325	0.0334526	yes
pir-1	T23G7.5	WBGene00011967	chrII	chrII:9177238-9188420	579.041	224.578	-1.36645	0.0443904	yes
pkc-3	F09E5.1	WBGene00004034	chrII	chrII:5380009-5384154	13.9173	50.1636	1.84976	0.0158637	yes
plk-2	Y71F9B.7	WBGene00004043	chrI	chrI:2755625-2758206	31.6798	91.9258	1.53691	0.0339647	yes
pme-5	ZK1005.1	WBGene00004053	chrV	chrV:1276420-1285700	5.67089	28.5577	2.33223	0.000807188	yes
pmk-1	B0218.3	WBGene00004055	chrIV	chrIV:8148779-8150727	0.541787	17.85	5.04205	0.0234754	yes
pmk-2	F42G8.3	WBGene00004056	chrIV	chrIV:8143485-8148626	3.88276	28.7898	2.89041	0.0145121	yes
pmk-3	F42G8.4	WBGene00004057	chrIV	chrIV:8139204-8143123	1.05771	22.1292	4.38693	0.00149835	yes
pod-2	W09B6.1	WBGene00004076	chrII	chrII:1143914-1152706	18.1735	63.9258	1.81456	0.0196722	yes
ppk-3	VF11C1L.1	WBGene00004089	chrX	chrX:12968889-12975573	1.18708	21.089	4.15101	4.71e-06	yes
pqn-15	C24A8.3	WBGene00004106	chrX	chrX:4303252-4311742	0.164758	5.268	4.99883	0.0317294	yes
pqn-20	C37A2.2	WBGene00004110	chrI	chrI:6791025-6797471	26.1215	7.79675	-1.74429	0.0235158	yes
pqn-27	E01G4.4	WBGene00004116	chrII	chrII:13448781-13460572	37.8177	9.23144	-2.03443	0.0114781	yes
pqn-34	F35B3.5	WBGene00004121	chrX	chrX:17021747-17030146	0.12859	11.1686	6.44052	0.00613439	yes
pqn-39	F48F7.4	WBGene00004126	chrX	chrX:13965667-13969499	0.0116113	6.03528	9.02175	0.0133722	yes
pqn-44	F55A12.9	WBGene00004131	chrI	chrI:5372857-5384511	9.85713	229.948	4.544	1.56e-10	yes
pqn-46	F57B9.9	WBGene00004133	chrIII	chrIII:6941833-6944683	0.372856	44.8625	6.91075	0.00306136	yes
pqn-47	F59B10.1	WBGene00004134	chrII	chrII:10496925-10502481	0.612804	4.78261	2.9643	0.0477907	yes
pqn-55	R09E10.7	WBGene00004140	chrIV	chrIV:10286932-10292975	0.410433	8.71655	4.40854	0.000394022	yes
pqn-65	T13H2.4	WBGene00004148	chrX	chrX:4610898-4620396	0.723695	51.8463	6.16272	8.97e-11	yes
prom-1	F26H9.1	WBGene00009173	chrI	chrI:9287438-9289757	29.3685	5.48402	-2.42096	0.00803625	yes
pssy-1	ZC506.3	WBGene00013920	chrX	chrX:9965436-9968518	0.304374	7.18798	4.56167	0.0265026	yes
ptp-3	C09D8.1	WBGene00004215	chrII	chrII:10968325-11012181	0.0499702	6.37031	6.99415	0.00241362	yes
ptr-10	F55F8.1	WBGene00004224	chrI	chrI:5662145-5667146	0	5.70829	1.79769e+308	0.0200007	yes
puf-9	W06B11.2	WBGene00004245	chrX	chrX:5841556-5845932	0.914219	17.3251	4.24418	0.000138599	yes
pxn-2	K09C8.5	WBGene00004257	chrX	chrX:10972119-10979199	0.0175698	1.34754	6.26109	0.0218573	yes
pyc-1	D2023.2	WBGene00004258	chrV	chrV:11817763-11822510	21.3279	94.109	2.14159	0.000646026	yes
pyr-1	D2085.1	WBGene00004259	chrII	chrII:8651083-8658758	0.0688737	47.0439	9.41584	7.66e-08	yes
rab-14	K09A9.2	WBGene00004276	chrX	chrX:15604697-15606567	0.0333841	3.83381	6.84347	0.0204542	yes
rab-19	Y62E10A.9	WBGene00004278	chrIV	chrIV:13382030-13386071	133.823	24.3291	-2.45957	0.0206624	yes
rab-30	Y45F3A.2	WBGene00004282	chrIII	chrIII:10562926-10565182	67.4744	15.9255	-2.083	0.0449526	yes
rba-1	K07A1.11	WBGene00004312	chrI	chrI:9616516-9618099	28.7859	128.542	2.1588	0.0021895	yes
rbc-1	F54E4.1	WBGene00004313	chrX	chrX:14610805-14624780	0.98774	16.2657	4.04156	0.00117804	yes
rbc-2	Y54F10AM.10	WBGene00004314	chrIII	chrIII:2512637-2528618	16.0262	3.50574	-2.19264	0.0105453	yes
rbg-1	F20D1.6	WBGene00004317	chrX	chrX:14983454-14987285	0.740503	60.8468	6.36053	9.81e-08	yes
rbg-3	B0393.2	WBGene00007167	chrIII	chrIII:4754396-4756978	179.512	54.3638	-1.72336	0.00820363	yes
rcn-1	F54E7.7	WBGene00004321	chrIII	chrIII:5682302-5684053	3.6966	28.6288	2.9532	0.0187999	yes
ref-1	T01E8.2	WBGene00004334	chrII	chrII:10218410-10219965	0.0878705	27.7569	8.30325	0.00325779	yes
rgs-10	F45B8.2	WBGene00004353	chrX	chrX:14962851-14963925	11.8109	52.7603	2.15933	0.04179	yes
rgs-11	F45B8.1	WBGene00004354	chrX	chrX:14964512-14965863	1.16446	43.2581	5.21524	0.00164178	yes
rgs-8.2	Y59E1A.2	WBGene00021988	chrX	chrX:1952472-1953554	0.0870573	57.1821	9.35938	0.00723854	yes
rhi-1	F46H6.1	WBGene00004356	chrX	chrX:4508479-4510933	0.113351	19.8263	7.45048	0.00332085	yes
rhr-1	F08F3.3	WBGene00004358	chrV	chrV:5428143-5430415	0.059428	3.20901	5.75484	0.036327	yes
rhy-1	W07A12.7	WBGene00012324	chrII	chrII:9161317-9163376	0.0067684	10.7006	10.6266	0.00619361	yes
rme-4	F46F6.1	WBGene00004375	chrX	chrX:10373179-10377692	0.197398	10.404	5.71989	0.0254145	yes
rnf-1	C06A5.9	WBGene00004380	chrI	chrI:6009782-6011525	1078.26	270.461	-1.99522	0.00107701	yes
rnf-121	C16C10.5	WBGene00007626	chrIII	chrIII:4168770-4171135	36.4013	125.466	1.78523	0.0155177	yes
rnh-1.2	ZK938.7	WBGene00014163	chrII	chrII:9839709-9841962	42.5795	10.6457	-1.99989	0.0310906	yes
rpb-12	F23B2.13	WBGene00009078	chrIV	chrIV:9146459-9146854	585.3	85.614	-2.77326	0.0459634	yes
rpb-5	H27M09.2	WBGene00019246	chrI	chrI:6850418-6851211	150.515	38.8593	-1.95357	0.0151657	yes
rpl-11.2	F07D10.1	WBGene00004423	chrX	chrX:2241747-2242612	106.219	590.98	2.47606	6.99e-05	yes
rpl-25.1	F55D10.2	WBGene00004438	chrX	chrX:4715146-4715769	79.3315	268.138	1.75701	0.024592	yes
rrf-2	M01G12.12	WBGene00004509	chrI	chrI:12098674-12105968	9.88346	49.0776	2.31198	0.00113108	yes
rsd-3	C34E11.1	WBGene00004682	chrX	chrX:11798434-11803587	2.3927	24.3949	3.34987	0.00194541	yes
sago-1	K12B6.1	WBGene00019666	chrV	chrV:6303781-6308266	0.0146755	6.65956	8.82587	0.0127069	yes
sar-1	ZK180.4	WBGene00022678	chrIV	chrIV:4511888-4513314	73.3888	17.6272	-2.05775	0.0130355	yes
sax-1	R11G1.4	WBGene00004727	chrX	chrX:3645865-3650139	4.49282	59.8008	3.73447	0.000142252	yes
sax-3	ZK377.2	WBGene00004729	chrX	chrX:3451932-3465912	0.102306	5.81943	5.82991	0.0122205	yes
scl-27	ZK6.3	WBGene00022638	chrV	chrV:400257-401603	0.529206	116.758	7.78548	0.00122151	yes
scpl-3	Y47D9A.2	WBGene00021629	chrI	chrI:4298259-4302238	2.51666	98.483	5.29029	2.49e-05	yes
scrm-4	F11A6.2	WBGene00008681	chrI	chrI:11675931-11682355	34.6559	113.555	1.71222	0.0481307	yes
sdc-1	F52E10.1	WBGene00004745	chrX	chrX:16275695-16282363	2.46722	53.782	4.44616	3.38e-08	yes
sdc-2	C35C5.1	WBGene00004746	chrX	chrX:11522646-11533384	0.0905204	2.81324	4.95785	0.00669385	yes
sdc-3	C25D7.3	WBGene00004747	chrV	chrV:15039339-15047774	1.62551	32.7377	4.33199	1.95e-08	yes
sdha-1	C03G5.1	WBGene00015391	chrX	chrX:8542813-8545968	0.091435	47.5349	9.02203	7.5e-06	yes
sdn-1	F57C7.3	WBGene00004749	chrX	chrX:10589717-10593272	0.215864	12.4224	5.84667	0.0361064	yes
sdpn-1	F45E1.7	WBGene00018467	chrX	chrX:7988891-7998086	0	11.7756	1.79769e+308	0.0131778	yes
sdz-27	R07H5.4	WBGene00011124	chrIV	chrIV:11186990-11188226	4.64701	1735.55	8.54487	0	yes
sea-1	F19B10.9	WBGene00004750	chrII	chrII:3671921-3673593	0.0101949	6.35428	9.28374	0.0217003	yes
sea-2	K10G6.3	WBGene00004751	chrII	chrII:3961691-3972137	0.719936	3.80599	2.40233	0.0434856	yes
sec-15	C28G1.3	WBGene00016188	chrX	chrX:8831693-8835662	0.0715921	6.46409	6.4965	0.0332635	yes
sec-3	F52E4.7	WBGene00018703	chrX	chrX:3095437-3099827	0.00825603	7.36037	9.80011	0.00879244	yes
sel-12	F35H12.3	WBGene00004769	chrX	chrX:915871-918234	0.00854758	4.60971	9.07494	0.0260293	yes
sem-5	C14F5.5	WBGene00004774	chrX	chrX:7959402-7961675	0.0173045	30.456	10.7814	1.83e-05	yes
set-18	T22A3.4	WBGene00044070	chrI	chrI:10590708-10593948	2.89516	21.67	2.90398	0.0481843	yes
set-19	W01C8.3	WBGene00020919	chrX	chrX:5675210-5680190	0.256192	5.84962	4.51304	0.0128128	yes
set-28	Y73B3B.2	WBGene00022224	chrX	chrX:214696-215575	51.8282	5.36347	-3.2725	0.0045986	yes
set-31	C15H11.5	WBGene00007615	chrV	chrV:14417939-14421425	308.441	100.706	-1.61485	0.0352391	yes
set-4	C32D5.5	WBGene00016313	chrII	chrII:6329819-6331283	60.0162	17.2426	-1.79937	0.0324559	yes
sex-1	F44A6.2	WBGene00004786	chrX	chrX:10201267-10205361	0.572864	8.58623	3.90576	0.0442671	yes
sfxn-2	C14F5.4	WBGene00015777	chrX	chrX:7956170-7958255	0.481252	16.6601	5.11346	0.0152674	yes
shc-2	T27F7.2	WBGene00020867	chrII	chrII:4969195-4988919	0.0534291	8.15054	7.25313	0.0230451	yes
sip-1	F43D9.4	WBGene00004798	chrIII	chrIII:10506012-10506703	2570.17	540.489	-2.24953	0.000261415	yes
skr-16	C42D4.6	WBGene00004822	chrIV	chrIV:7168697-7169334	5.47614	39.4793	2.84986	0.0434296	yes
skr-2	F46A9.4	WBGene00004808	chrI	chrI:9469681-9470625	268.741	87.0398	-1.62647	0.0254145	yes
sma-1	R31.1	WBGene00004855	chrV	chrV:11899544-11916604	0.318773	30.9474	6.60115	7.26e-12	yes
sma-9	T05A10.1	WBGene00004862	chrX	chrX:10769222-10782908	0.719478	8.12504	3.49735	0.0190258	yes
smf-1	K11G12.4	WBGene00004876	chrX	chrX:6719630-6723027	0.0297881	16.1647	9.0839	0.0126308	yes
snf-1	W03G9.1	WBGene00004900	chrI	chrI:4980306-4983955	0.590618	13.6144	4.52677	0.00440949	yes
snr-7	Y71F9B.4	WBGene00004920	chrI	chrI:2727015-2727546	90.6236	20.38	-2.15273	0.0473616	yes
snx-1	C05D9.1	WBGene00004927	chrX	chrX:1128982-1132671	0.696581	10.2295	3.8763	0.0260293	yes
sod-1	C15F1.7	WBGene00004930	chrII	chrII:6972669-6973850	156.751	44.6662	-1.81122	0.0457801	yes
sod-3	C08A9.1	WBGene00004932	chrX	chrX:17092643-17094149	0	12.9946	1.79769e+308	0.0473616	yes
sod-5	ZK430.3	WBGene00007036	chrII	chrII:4417682-4419045	2.78079	226.611	6.34858	2.14e-05	yes
sop-2	C50E10.4	WBGene00004945	chrII	chrII:12339879-12344701	6.63108	53.9771	3.02503	3.9e-05	yes
sor-1	ZK1236.3	WBGene00023405	chrIII	chrIII:8416154-8422578	1.39335	33.8609	4.60299	0.000946146	yes
sor-3	C04E7.2	WBGene00015429	chrX	chrX:353619-357934	0.00668188	5.75372	9.75003	0.0141469	yes
spat-3	T13H2.5	WBGene00020496	chrX	chrX:4596049-4605869	3.37676	86.6107	4.68083	2.41e-07	yes
spc-1	K10B3.10	WBGene00004951	chrX	chrX:3117430-3127063	0.356562	45.2801	6.98858	1.32e-11	yes
spe-6	Y66D12A.20	WBGene00004960	chrIII	chrIII:11505453-11508812	187.922	46.9998	-1.99941	0.00375424	yes
sphk-1	C34C6.5	WBGene00007918	chrII	chrII:8699005-8701618	120.91	35.7882	-1.75638	0.0144747	yes
spr-3	C07A12.5	WBGene00005008	chrX	chrX:4514070-4516864	0.0194549	12.6058	9.33974	0.0136764	yes
sptl-3	T22G5.5	WBGene00011932	chrV	chrV:13893351-13896391	0.689986	28.515	5.36901	0.000246083	yes
sqrd-1	F02H6.5	WBGene00008538	chrIV	chrIV:14219849-14224414	5.66103	179.813	4.98929	2.68e-10	yes
srp-6	C03G6.19	WBGene00005647	chrV	chrV:7384213-7386099	0	27.9352	1.79769e+308	0.00656201	yes
srz-4	B0414.1	WBGene00015175	chrI	chrI:5801874-5803269	13.8811	0.198359	-6.12886	0.00571657	yes
stau-1	F55A4.5	WBGene00018857	chrX	chrX:1027669-1035241	1.80891	55.1824	4.93102	7.53e-07	yes
stdh-1	C06B3.4	WBGene00007363	chrV	chrV:13906482-13907962	1.82698	114.595	5.97095	1.1e-05	yes
sto-1	F08C6.4	WBGene00006063	chrX	chrX:7562789-7564758	1.40194	44.9214	5.00191	0.0335922	yes
sto-4	Y71H9A.3	WBGene00006066	chrX	chrX:11644075-11647213	0.911722	174.568	7.58098	3.55e-06	yes
sur-5	K03A1.5	WBGene00006351	chrX	chrX:7301311-7305525	0.0132717	6.81201	9.00359	0.013586	yes
swan-1	F53C11.8	WBGene00009977	chrV	chrV:13804381-13807225	0.307206	13.7261	5.48157	0.00764206	yes
swan-2	F53C11.7	WBGene00009976	chrV	chrV:13800977-13804267	0.563272	22.6086	5.3269	0.000390756	yes
syg-2	C26G2.1	WBGene00007750	chrX	chrX:14654920-14662772	0.0112728	1.32441	6.87636	0.0224307	yes
sym-4	R03E1.1	WBGene00006369	chrX	chrX:14164582-14169630	0.0211982	3.86217	7.50932	0.0102275	yes
sym-5	C44H4.2	WBGene00002282	chrX	chrX:14578016-14580840	0	5.42383	1.79769e+308	0.0319308	yes
syn-16	ZC155.7	WBGene00022534	chrIII	chrIII:5207583-5209164	991.894	331.354	-1.58181	0.013706	yes
taf-11.3	F43D9.5	WBGene00006395	chrIII	chrIII:10503974-10505127	90.3511	15.6585	-2.5286	0.00914964	yes
tag-123	F08F1.7	WBGene00006472	chrX	chrX:8418592-8422002	1.28357	69.7409	5.76377	7.24e-08	yes
tag-124	E02H1.3	WBGene00006473	chrII	chrII:9591248-9592870	683.728	244.668	-1.4826	0.0220479	yes
tag-131	H38K22.3	WBGene00006478	chrIII	chrIII:4317674-4320299	119.798	41.1553	-1.54145	0.0387804	yes
tag-146	C27A12.3	WBGene00006492	chrI	chrI:6038407-6041271	37.1342	9.1629	-2.01887	0.0205861	yes
tag-147	R09A8.3	WBGene00006493	chrX	chrX:12624602-12634286	0.0173745	5.59115	8.33003	0.0166092	yes
tag-172	E02H4.3	WBGene00006517	chrX	chrX:14284765-14293923	0.820702	28.2433	5.1049	6.07e-05	yes
tag-192	E02H4.3	WBGene00006517	chrI	chrI:4685873-4698576	0.806097	55.1378	6.09595	0	yes
tag-197	F08C6.3	WBGene00007059	chrX	chrX:7565275-7568089	0.00546772	12.4935	11.158	0.0035696	yes
tag-199	F45E4.3	WBGene00018468	chrIV	chrIV:7606469-7619106	0.00772626	1.20722	7.28771	0.045824	yes
tag-216	K08F9.2	WBGene00010685	chrV	chrV:15134175-15136786	34.1816	103.486	1.59815	0.0296279	yes
tag-262	Y54H5A.3	WBGene00021901	chrIII	chrIII:5152001-5153115	124.656	40.0206	-1.63914	0.0366279	yes
tag-273	Y57G11A.1	WBGene00013289	chrIV	chrIV:14487058-14505139	0.021658	16.4306	9.56727	0.00141221	yes
tag-277	ZK652.3	WBGene00044324	chrIII	chrIII:7858911-7859447	89.6417	8.65525	-3.37252	0.00575616	yes
tag-294	C54H2.3	WBGene00016937	chrX	chrX:5760260-5763341	2.21191	24.1862	3.45082	0.00269907	yes
tag-299	F14F3.3	WBGene00008806	chrX	chrX:14979303-14980040	3.24799	49.5463	3.93116	0.00834512	yes
tag-32	T13A10.11	WBGene00006416	chrIV	chrIV:6277423-6279520	0.965911	57.6685	5.89975	0.000138442	yes
tag-320	B0403.4	WBGene00015168	chrX	chrX:7066300-7068519	188.179	504.518	1.4228	0.0319039	yes
tag-322	C33H5.10	WBGene00044326	chrIV	chrIV:7783968-7785544	119.731	36.4626	-1.7153	0.0229429	yes
tag-335	C42C1.5	WBGene00016583	chrIV	chrIV:12276063-12278030	34.2454	7.69152	-2.15457	0.0203261	yes
tag-343	F43B10.2	WBGene00018374	chrX	chrX:16665042-16674659	0.0323861	7.97834	7.94457	0.0205861	yes
tag-344	B0511.4	WBGene00015230	chrI	chrI:10644272-10645561	1.9245	36.8543	4.25928	0.00275457	yes
tag-345	F55F8.5	WBGene00018893	chrI	chrI:5655951-5658715	260.382	70.9891	-1.87496	0.01126	yes
tag-347	C25G4.4	WBGene00007732	chrIV	chrIV:12452077-12454192	49.3248	5.59742	-3.13948	0.000306993	yes
tag-51	K02F3.1	WBGene00006430	chrIII	chrIII:854208-856521	230.639	69.1657	-1.73751	0.00798475	yes
tag-53	F33C8.1	WBGene00006432	chrX	chrX:14710404-14718709	2.02684	10.422	2.36232	0.0481087	yes
tag-68	F37D6.6	WBGene00006445	chrI	chrI:10501588-10505435	0.468012	29.4229	5.97425	0.00515705	yes
tag-96	M01D7.4	WBGene00006461	chrI	chrI:1845222-1850453	2.07795	17.0558	3.03703	0.028819	yes
tat-4	T24H7.5	WBGene00020784	chrII	chrII:6234452-6244202	0.234801	13.943	5.89195	0.0450145	yes
tbb-6	T04H1.9	WBGene00006539	chrV	chrV:12261784-12263349	0.0259866	23.3419	9.81094	0.00603591	yes
tbc-1	F20D1.2	WBGene00008974	chrX	chrX:14970680-14974693	5.13668	44.4431	3.11305	0.000272409	yes
tbc-11	F35H12.2	WBGene00018075	chrX	chrX:924984-932235	9.51814	40.3173	2.08265	0.0315618	yes
tbc-12	R11B5.1	WBGene00044061	chrX	chrX:2525205-2532429	0.1804	22.8537	6.98509	0.00218466	yes
tbx-2	F21H11.3	WBGene00006543	chrIII	chrIII:5130887-5136280	1.05824	11.7696	3.47532	0.0176664	yes
tdc-1	K01C8.3	WBGene00006562	chrII	chrII:8270556-8273533	168.494	31.9791	-2.39749	0.000474905	yes
ten-1	R13F6.4	WBGene00006498	chrIII	chrIII:6830336-6847230	0.493579	14.0247	4.82855	0.00977977	yes
thk-1	Y43C5A.5	WBGene00006568	chrIV	chrIV:10278000-10281560	160.732	51.8755	-1.63153	0.0293327	yes
tig-2	F39G3.8	WBGene00006570	chrV	chrV:4726714-4730155	1.68622	32.2888	4.25917	0.00309299	yes
toca-1	F09E10.8	WBGene00017298	chrX	chrX:1510512-1521482	0.191722	8.33938	5.44285	0.0132554	yes
tra-3	LLC1.1	WBGene00006606	chrIV	chrIV:14436339-14444156	0.599719	7.62273	3.66795	0.0256638	yes
tra-4	F53B3.1	WBGene00018740	chrX	chrX:2853686-2857595	0.862506	74.7649	6.43768	4.73e-07	yes
trap-2	T04G9.5	WBGene00020216	chrX	chrX:767030-768069	1.39387	45.397	5.02543	0.00275457	yes
trap-3	Y38F2AR.2	WBGene00021420	chrIV	chrIV:2389441-2390385	120.247	26.492	-2.18238	0.00645487	yes
trap-4	Y56A3A.21	WBGene00013238	chrIII	chrIII:11920615-11921520	224.982	61.454	-1.87223	0.0108033	yes
tth-1	F08F1.8	WBGene00006649	chrX	chrX:8422425-8423680	0.23375	10.5758	5.49966	0.0490626	yes
ttr-50	F58B3.9	WBGene00010234	chrIV	chrIV:11640121-11640992	4.47028	216.707	5.59924	3.06e-07	yes
ttr-53	T14G10.3	WBGene00011773	chrIV	chrIV:10158040-10158712	298.949	19.3186	-3.95184	2.21e-05	yes
tyr-1	C02C2.1	WBGene00015332	chrIII	chrIII:7873714-7877041	0.0297689	6.71895	7.81829	0.00240045	yes
uaf-2	Y116A8C.35	WBGene00006698	chrIV	chrIV:17116726-17118724	177.79	49.1735	-1.85423	0.00956916	yes
uba-1	C47E12.5	WBGene00006699	chrIV	chrIV:9989648-9995013	79.1241	207.612	1.3917	0.0387804	yes
ubc-18	R01H2.6	WBGene00006713	chrIII	chrIII:7067650-7068510	165.178	35.5561	-2.21585	0.00615852	yes
ucr-2.1	VW06B3R.1	WBGene00012158	chrX	chrX:12018360-12021144	10.2955	78.5596	2.93178	0.000246083	yes
ucr-2.2	T10B10.2	WBGene00011679	chrX	chrX:15173833-15181397	1.25655	33.3383	4.72964	0.00438729	yes
ugt-26	C10H11.6	WBGene00015695	chrI	chrI:4721178-4723961	0.0324777	14.0005	8.75182	0.0149403	yes
ugt-28	C10H11.4	WBGene00015693	chrI	chrI:4727301-4730367	0.675108	103.07	7.25429	4.24e-07	yes
ugt-45	Y37E11AR.5	WBGene00021372	chrIV	chrIV:3748251-3751096	0.286887	20.3644	6.14942	0.00366268	yes
umps-1	T07C4.1	WBGene00011559	chrIII	chrIII:10355704-10357601	15.1955	64.5927	2.08773	0.00819769	yes
unc-11	C32E8.10	WBGene00006751	chrI	chrI:3799126-3805721	34.4435	7.50635	-2.19805	0.0434503	yes
unc-112	C47E8.7	WBGene00006836	chrV	chrV:14689138-14696918	2.24755	22.3316	3.31266	0.0179616	yes
unc-115	F09B9.2	WBGene00006839	chrX	chrX:10146832-10153081	0.902696	43.2959	5.58385	5.05e-06	yes
unc-14	K10D3.2	WBGene00006753	chrI	chrI:7122610-7128422	5.42899	184.964	5.09042	0	yes
unc-23	H14N18.1	WBGene00006760	chrV	chrV:8936369-8944041	4.48809	51.0505	3.50775	0.0389408	yes
unc-32	ZK637.8	WBGene00006768	chrIII	chrIII:8905537-8911670	12.6014	42.7903	1.7637	0.0295715	yes
unc-33	Y37E11C.1	WBGene00006769	chrIV	chrIV:3516817-3526597	15.7143	2.48597	-2.6602	0.00330786	yes
unc-38	F21F3.5	WBGene00006774	chrI	chrI:4897691-4900978	4.89441	151.663	4.95359	2.2e-09	yes
unc-44	B0350.2	WBGene00006780	chrIV	chrIV:5966643-6004021	2.31507	30.9855	3.74247	0.000545536	yes
unc-51	Y60A3A.1	WBGene00006786	chrV	chrV:19995966-20004456	0.96476	14.0538	3.86465	0.00171839	yes
unc-60	C38C3.5	WBGene00006794	chrV	chrV:1475071-1479581	46.8919	207.26	2.14403	0.0145121	yes
unc-70	K11C4.3	WBGene00006803	chrV	chrV:6881325-6891385	0.427191	3.32608	2.96087	0.0337034	yes
unc-83	W01A11.3	WBGene00006815	chrV	chrV:6465047-6487863	0.75206	8.65078	3.52391	0.0039657	yes
unc-84	F54B11.3	WBGene00006816	chrX	chrX:13584704-13589753	0.0563399	28.6937	8.99236	0.000210428	yes
unc-97	F14D12.2	WBGene00006826	chrX	chrX:5593097-5594930	0.0607564	12.5572	7.69127	0.00380128	yes
upp-1	ZK783.2	WBGene00022817	chrIII	chrIII:7625897-7643038	64.2523	11.145	-2.52735	0.0196899	yes
utx-1	D2021.1	WBGene00017046	chrX	chrX:8557098-8563172	0.0771876	17.0196	7.78461	0.0014478	yes
vav-1	C35B8.2	WBGene00006887	chrX	chrX:9216816-9232016	0.170878	21.6631	6.98614	0.0147901	yes
vha-1	R10E11.8	WBGene00006910	chrIII	chrIII:9781165-9781977	109.458	34.0056	-1.68654	0.0438912	yes
vha-12	F20B6.2	WBGene00006921	chrX	chrX:4191067-4193115	0.281471	54.8386	7.60606	0.00021039	yes
vha-15	T14F9.1	WBGene00020507	chrX	chrX:2237900-2240247	7.12033	75.2791	3.40223	1.1e-05	yes
vha-16	C30F8.2	WBGene00016258	chrI	chrI:5079917-5082284	69.8034	16.645	-2.06821	0.00839874	yes
vha-4	T01H3.1	WBGene00006913	chrII	chrII:7878038-7879284	70.8738	16.6194	-2.09238	0.0149403	yes
vha-7	C26H9A.1	WBGene00006916	chrIV	chrIV:12640434-12650620	27.1738	87.6186	1.68902	0.0196915	yes
vps-41	F32A6.3	WBGene00017974	chrX	chrX:5283798-5289662	0.610771	16.0879	4.7192	0.000653339	yes
wdfy-2	D2013.2	WBGene00008402	chrII	chrII:9319805-9321819	116.461	41.449	-1.49044	0.0401696	yes
wrm-1	B0336.1	WBGene00006943	chrIII	chrIII:5722803-5727067	35.3063	10.5927	-1.73685	0.0340553	yes
wts-1	T20F10.1	WBGene00007047	chrI	chrI:10291884-10297913	0.322734	10.4603	5.01844	0.00655672	yes
zip-2	K02F3.4	WBGene00019327	chrIII	chrIII:833619-839512	2.54422	15.3784	2.59561	0.0301371	yes
zoo-1	Y105E8A.26	WBGene00013683	chrI	chrI:14529518-14546622	0.620667	12.7129	4.35633	0.0139383	yes
ztf-16	R08E3.4	WBGene00019960	chrX	chrX:4805990-4811506	0.0227111	3.10689	7.09593	0.0346228	yes
ztf-23	Y54E10BR.8	WBGene00021846	chrI	chrI:3052053-3059167	190.145	62.686	-1.60088	0.0208222	yes

## Sheet: Smartseq_WT_emb-to-L1
test_id	gene_ID	Wormbase ID	locus	locus.1	Wild-type EMB PGCs FPKM	Wild-type L1 PGCs FPKM	log2.fold_change.	q_value	significant
B0001.6	B0001.6	WBGene00007091	chrIV	chrIV:12156815-12164244	21.0277	1.64838	-3.67316	0.00862459	yes
B0228.7	B0228.7	WBGene00015064	chrII	chrII:7757137-7758387	141.332	522.229	1.8856	0.0409551	yes
B0304.4	B0304.4	WBGene00015136	chrII	chrII:4522470-4523219	165.242	767.991	2.21651	0.0091945	yes
B0393.8	B0393.8	WBGene00007173	chrIII	chrIII:4751842-4752335	51.0957	245.102	2.26211	0.0406655	yes
B0416.5	B0416.5	WBGene00015181	chrX	chrX:9268574-9270794	42.4521	1.32652	-5.00012	0.000488416	yes
B0507.2	B0507.2	WBGene00015219	chrV	chrV:8774309-8776459	6.79715	0.0801651	-6.40581	0.0274145	yes
C01F1.3	C01F1.3	WBGene00015298	chrII	chrII:4295102-4299008	15.357	110.882	2.85205	0.0328251	yes
C01G6.3	C01G6.3	WBGene00007225	chrII	chrII:9269833-9271207	47.1981	0.527211	-6.4842	0.00130638	yes
C02B10.2	C02B10.2	WBGene00015327	chrIV	chrIV:5090281-5091025	35.4989	154.177	2.11874	0.0319476	yes
C03A3.2	C03A3.2	WBGene00007267	chrX	chrX:11262780-11266247	28.6585	0.453102	-5.98298	0.00488978	yes
C03H12.1	C03H12.1	WBGene00007284	chrX	chrX:15689389-15696290	6.91815	0.0103968	-9.3781	0.0277723	yes
C04C11.2	C04C11.2	WBGene00007296	chrX	chrX:14033731-14037363	10.5621	0.343147	-4.94392	0.0332696	yes
C04F12.1	C04F12.1	WBGene00007297	chrI	chrI:9673658-9678544	61.3081	2.23981	-4.77463	2.82e-05	yes
C04F5.8	C04F5.8	WBGene00015450	chrV	chrV:5111515-5113739	31.5445	117.811	1.90101	0.0469197	yes
C05C10.7	C05C10.7	WBGene00007334	chrII	chrII:9938052-9938903	347.568	2000.7	2.52514	0.00396401	yes
C05D11.10	C05D11.10	WBGene00015487	chrIII	chrIII:6430985-6431740	32.388	147.39	2.18611	0.0409866	yes
C06A8.3	C06A8.3	WBGene00015514	chrII	chrII:7785129-7794267	57.2425	4.34243	-3.72051	0.0102376	yes
C06B8.7	C06B8.7	WBGene00007372	chrV	chrV:15498724-15511394	2.91923	0.0992926	-4.87776	0.0130808	yes
C06G3.6	C06G3.6	WBGene00015552	chrIV	chrIV:7017614-7020191	21.9382	3.05448	-2.84445	0.0262535	yes
C06H2.7	C06H2.7	WBGene00007391	chrV	chrV:11141479-11144403	19.8167	1.5654	-3.66212	0.0484205	yes
C07D10.5	C07D10.5	WBGene00015569	chrII	chrII:7381517-7383433	22.4801	2.06158	-3.44683	0.0289909	yes
C07D8.6	C07D8.6	WBGene00015565	chrX	chrX:7341462-7342730	14.0206	0.197703	-6.14807	0.0409142	yes
C08F1.10	C08F1.10	WBGene00015613	chrII	chrII:1785275-1786283	75.5965	0.148561	-8.99112	0.00310226	yes
C08F1.11	C08F1.11	WBGene00044417	chrII	chrII:1783460-1784448	18.1673	0.186638	-6.60496	0.0484768	yes
C09E9.1	C09E9.1	WBGene00007476	chrIV	chrIV:1275864-1277060	24.0938	148.289	2.62168	0.0134003	yes
C10E2.6	C10E2.6	WBGene00015676	chrX	chrX:16767106-16770427	6.34861	0.0105598	-9.23172	0.0283861	yes
C10G6.1	C10G6.1	WBGene00015680	chrIV	chrIV:5820358-5830189	14.8054	1.49646	-3.3065	0.0469197	yes
C14B1.3	C14B1.3	WBGene00007574	chrIII	chrIII:3703629-3705009	15.3529	70.2711	2.19442	0.0258508	yes
C17E4.2	C17E4.2	WBGene00007642	chrI	chrI:9410606-9416695	36.156	1.6136	-4.48588	0.000252557	yes
C17H11.2	C17H11.2	WBGene00015922	chrX	chrX:8169879-8172818	53.4856	0.371645	-7.16908	0.000305475	yes
C18B12.6	C18B12.6	WBGene00007668	chrX	chrX:15003997-15007238	19.0935	0.438935	-5.44293	0.0210263	yes
C18E3.3	C18E3.3	WBGene00015972	chrI	chrI:4203459-4208521	9.75699	1.3763	-2.82565	0.0476648	yes
C23F12.4	C23F12.4	WBGene00016009	chrX	chrX:9387376-9389130	63.2348	2.05051	-4.94667	0.00736329	yes
C23G10.7	C23G10.7	WBGene00016014	chrIII	chrIII:6195937-6198364	65.7468	344.372	2.38897	0.0192632	yes
C24H12.1	C24H12.1	WBGene00016071	chrII	chrII:441497-446928	12.8867	0.0690771	-7.54346	0.00693073	yes
C25A11.2	C25A11.2	WBGene00016087	chrX	chrX:9114311-9116820	5.65676	0.0284909	-7.63333	0.0196333	yes
C26B2.7	C26B2.7	WBGene00016129	chrIV	chrIV:8016199-8016867	165.427	930.997	2.49258	0.00221552	yes
C26B2.8	C26B2.8	WBGene00016130	chrIV	chrIV:8014114-8015624	3.30883	60.6926	4.19713	0.000669905	yes
C27C12.1	C27C12.1	WBGene00007771	chrX	chrX:14849246-14853685	22.2734	1.29003	-4.10985	0.0400155	yes
C27C12.4	C27C12.4	WBGene00007774	chrX	chrX:14854061-14856449	20.5778	1.46946	-3.80773	0.0240746	yes
C27F2.7	C27F2.7	WBGene00016169	chrIII	chrIII:4980607-4984439	42.3893	183.993	2.11788	0.0144772	yes
C33D9.5	C33D9.5	WBGene00007899	chrIV	chrIV:8778373-8780859	16.9484	0.023107	-9.5186	0.0184311	yes
C33D9.6	C33D9.6	WBGene00007900	chrIV	chrIV:8775419-8778132	11.1575	0.743161	-3.90819	0.0489042	yes
C34E7.4	C34E7.4	WBGene00007934	chrX	chrX:12932168-12934907	29.1764	1.19664	-4.60773	0.0142454	yes
C35C5.6	C35C5.6	WBGene00007956	chrX	chrX:11563921-11569624	10.2203	0.0202405	-8.97998	0.00368929	yes
C35E7.5	C35E7.5	WBGene00016457	chrI	chrI:10823346-10828443	28.8308	0.623326	-5.53148	0.000123964	yes
C35E7.8	C35E7.8	WBGene00016460	chrI	chrI:10808595-10810373	25.5804	127.999	2.32302	0.00994472	yes
C36B1.11	C36B1.11	WBGene00007978	chrI	chrI:8755906-8757564	263.551	39.8924	-2.7239	0.0157263	yes
C36B7.6	C36B7.6	WBGene00016469	chrX	chrX:7097419-7100297	28.7463	0.841197	-5.09479	0.000998824	yes
C37A2.8	C37A2.8	WBGene00016494	chrI	chrI:6798248-6799629	208.738	822.458	1.97825	0.0469197	yes
C37H5.6	C37H5.6	WBGene00016509	chrV	chrV:4818751-4823330	157.64	704.617	2.1602	0.036887	yes
C40A11.6	C40A11.6	WBGene00016549	chrII	chrII:2144362-2145587	20.2608	0.217753	-6.53986	0.0271859	yes
C41H7.6	C41H7.6	WBGene00016576	chrII	chrII:3000827-3002414	30.4273	1.6744	-4.18365	0.0125897	yes
C43H6.7	C43H6.7	WBGene00016620	chrX	chrX:2398804-2402044	24.7259	1.25086	-4.30503	0.0240449	yes
C44B9.2	C44B9.2	WBGene00008079	chrIII	chrIII:10875359-10877915	3.13783	68.6543	4.45151	0.000505832	yes
C44C1.2	C44C1.2	WBGene00016642	chrX	chrX:957882-960558	8.18565	0.0465349	-7.45864	0.0135108	yes
C44C10.4	C44C10.4	WBGene00008085	chrX	chrX:11693397-11695673	6.61279	0.0160462	-8.68688	0.0469197	yes
C44E4.2	C44E4.2	WBGene00016651	chrI	chrI:4631391-4633348	16.8867	76.2648	2.17513	0.0302402	yes
C46A5.6	C46A5.6	WBGene00016702	chrIV	chrIV:7760117-7763830	141.773	548.318	1.95143	0.0337766	yes
C46C11.4	C46C11.4	WBGene00044567	chrX	chrX:4644376-4646369	14.9702	0.0798054	-7.55139	0.0212648	yes
C46C2.2	C46C2.2	WBGene00008110	chrIV	chrIV:9216935-9220157	18.2978	0.466724	-5.29296	0.0135209	yes
C46H3.2	C46H3.2	WBGene00016725	chrX	chrX:1211764-1220024	18.3839	0.0120984	-10.5694	0.0385015	yes
C48B4.6	C48B4.6	WBGene00008169	chrIII	chrIII:9557368-9558467	73.8322	322.572	2.1273	0.0168178	yes
C50A2.2	C50A2.2	WBGene00016796	chrIV	chrIV:1170705-1176675	3.34014	25.1925	2.91501	0.0213856	yes
C52D10.12	C52D10.12	WBGene00016879	chrIV	chrIV:17197871-17206807	11.3222	0.738843	-3.93775	0.0308617	yes
C52E12.6	C52E12.6	WBGene00016890	chrII	chrII:7022884-7024888	2.51848	24.8132	3.30048	0.0366762	yes
C56G2.4	C56G2.4	WBGene00016979	chrIII	chrIII:6331677-6335776	15.9468	0.0556986	-8.16141	0.0283432	yes
D1005.1	D1005.1	WBGene00016995	chrX	chrX:1479536-1484393	12.543	0.125863	-6.63888	0.00221552	yes
E01G4.5	E01G4.5	WBGene00008447	chrII	chrII:13472360-13473853	22.1614	0.364029	-5.92785	0.0144772	yes
EEED8.13	EEED8.13	WBGene00017141	chrII	chrII:5411617-5412151	27.2356	167.352	2.61932	0.0223175	yes
EEED8.15	EEED8.15	WBGene00017143	chrII	chrII:5419230-5421084	32.7392	1.57733	-4.37546	0.00579527	yes
F01G10.7	F01G10.7	WBGene00008510	chrIV	chrIV:10239255-10241837	19.3282	0.0508531	-8.57016	0.0274926	yes
F08G12.2	F08G12.2	WBGene00008586	chrX	chrX:11298016-11299623	118.718	4.76645	-4.63848	5.69e-05	yes
F09C8.2	F09C8.2	WBGene00008622	chrX	chrX:16140441-16146952	31.2574	1.06042	-4.88149	5.86e-05	yes
F13C5.2	F13C5.2	WBGene00017423	chrX	chrX:593959-596289	29.5309	0.520085	-5.82733	0.0103693	yes
F14B6.3	F14B6.3	WBGene00008784	chrI	chrI:12230406-12232296	13.1466	0.313994	-5.38781	0.0484205	yes
F14D2.14	F14D2.14	WBGene00017462	chrII	chrII:3346822-3347518	78.6191	320.731	2.02841	0.0332252	yes
F14D2.8	F14D2.8	WBGene00017456	chrII	chrII:3347576-3349873	15.5773	70.5435	2.17907	0.0250591	yes
F16B12.6	F16B12.6	WBGene00008882	chrX	chrX:14102289-14107836	13.8745	2.48762	-2.47959	0.0288292	yes
F17H10.1	F17H10.1	WBGene00008925	chrX	chrX:13105122-13108462	24.9045	0.952035	-4.70925	0.00842836	yes
F19B10.10	F19B10.10	WBGene00017589	chrII	chrII:3677537-3681418	9.56722	0.00644413	-10.5359	0.0146009	yes
F20A1.9	F20A1.9	WBGene00017620	chrV	chrV:7049416-7051273	195.971	858.474	2.13114	0.0310472	yes
F20C5.5	F20C5.5	WBGene00008970	chrIV	chrIV:8767674-8770103	4.63461	0.00601792	-9.58897	0.0337948	yes
F20D1.3	F20D1.3	WBGene00008975	chrX	chrX:14976046-14978642	132.401	6.78623	-4.28616	5.86e-05	yes
F21A10.2	F21A10.2	WBGene00008999	chrX	chrX:10181750-10194317	45.9512	0.79064	-5.86094	8.43e-05	yes
F21C10.7	F21C10.7	WBGene00017657	chrV	chrV:9112767-9122096	4.24863	0.104932	-5.33948	0.0177914	yes
F21F3.3	F21F3.3	WBGene00017673	chrI	chrI:4901974-4903137	15.3047	119.829	2.96893	0.00231744	yes
F21F3.4	F21F3.4	WBGene00017674	chrI	chrI:4896003-4897542	241.576	1050.61	2.12068	0.0406128	yes
F25B4.2	F25B4.2	WBGene00017766	chrV	chrV:5709401-5712311	8.37175	0.050711	-7.36709	0.0126273	yes
F25E5.1	F25E5.1	WBGene00017782	chrV	chrV:7465877-7471174	12.8138	0.439673	-4.86512	0.00365385	yes
F25H9.7	F25H9.7	WBGene00009139	chrV	chrV:13468402-13469070	147.413	637.943	2.11357	0.0152991	yes
F26A1.13	F26A1.13	WBGene00017811	chrIII	chrIII:4847035-4848931	8.75021	41.6756	2.25181	0.0471315	yes
F26H9.5	F26H9.5	WBGene00009177	chrI	chrI:9312635-9314480	65.9963	277.433	2.07168	0.0194277	yes
F27B3.5	F27B3.5	WBGene00017847	chrIII	chrIII:6559045-6562842	8.0412	32.8832	2.03187	0.0349446	yes
F28C10.3	F28C10.3	WBGene00017898	chrX	chrX:531885-535750	13.5359	0.173804	-6.28319	0.0212648	yes
F31E3.6	F31E3.6	WBGene00017952	chrIII	chrIII:6982454-6983007	38.3197	204.008	2.41247	0.0257648	yes
F32B5.7	F32B5.7	WBGene00017980	chrI	chrI:2672951-2682799	2.56322	0.00441074	-9.18272	0.0473096	yes
F33H2.3	F33H2.3	WBGene00009367	chrI	chrI:15034505-15035456	67.8535	5.34635	-3.6658	0.00366998	yes
F33H2.6	F33H2.6	WBGene00009369	chrI	chrI:15014839-15016584	37.4699	155.773	2.05564	0.0253361	yes
F35G12.5	F35G12.5	WBGene00009442	chrIII	chrIII:4584899-4586442	27.5439	105.431	1.9365	0.0466764	yes
F36H12.2	F36H12.2	WBGene00018118	chrIV	chrIV:5249384-5308853	19.2628	90.0724	2.22527	0.0253361	yes
F36H5.8	F36H5.8	WBGene00018106	chrII	chrII:1748383-1751603	5.25433	0.0197967	-8.0521	0.00918428	yes
F37B4.10	F37B4.10	WBGene00018140	chrV	chrV:2875800-2877633	77.6395	1.22043	-5.99133	0.00151274	yes
F38B7.3	F38B7.3	WBGene00009534	chrV	chrV:11549282-11551529	28.9574	2.79734	-3.3718	0.0150391	yes
F38E9.5	F38E9.5	WBGene00018187	chrX	chrX:16446124-16451262	101.83	0.694606	-7.19575	0.000175072	yes
F39B1.1	F39B1.1	WBGene00009552	chrX	chrX:15234777-15246296	10.036	0.0642808	-7.28658	0.00862459	yes
F39C12.1	F39C12.1	WBGene00018193	chrX	chrX:4834865-4853035	3.73553	0.529705	-2.81805	0.0158288	yes
F40E10.6	F40E10.6	WBGene00009574	chrX	chrX:14703634-14706787	5.42115	0.0151553	-8.48263	0.00512658	yes
F40G9.5	F40G9.5	WBGene00018241	chrIII	chrIII:183343-184905	31.9473	2.25463	-3.82473	0.032692	yes
F40G9.6	F40G9.6	WBGene00018242	chrIII	chrIII:179540-180139	115.45	0.0446409	-11.3366	0.00766239	yes
F43C11.9	F43C11.9	WBGene00018386	chrII	chrII:2337916-2340751	14.1167	0.0127032	-10.118	0.0223175	yes
F43G6.4	F43G6.4	WBGene00009657	chrII	chrII:11790695-11797184	9.82635	0.0759871	-7.01476	0.0203536	yes
F44E5.3	F44E5.3	WBGene00009690	chrII	chrII:11762102-11765599	10.8992	0.00975807	-10.1253	0.0220142	yes
F44F4.3	F44F4.3	WBGene00009702	chrII	chrII:10884668-10885818	35.3822	134.011	1.92125	0.0486055	yes
F45C12.15	F45C12.15	WBGene00018446	chrII	chrII:1733725-1736539	38.6455	6.28952	-2.61928	0.0269403	yes
F46F11.7	F46F11.7	WBGene00018510	chrI	chrI:5620782-5622924	33.661	159.184	2.24154	0.0126273	yes
F46F6.2	F46F6.2	WBGene00009793	chrX	chrX:10397182-10406243	17.2852	0.965833	-4.16162	0.0013057	yes
F46H5.4	F46H5.4	WBGene00018520	chrX	chrX:7245033-7254518	5.7037	0.584097	-3.28762	0.0241725	yes
F47B10.1	F47B10.1	WBGene00009812	chrX	chrX:10897612-10900051	37.0931	2.77492	-3.74063	0.00366029	yes
F47G3.3	F47G3.3	WBGene00018578	chrX	chrX:2375989-2378645	37.307	2.35559	-3.98529	0.0126273	yes
F47G4.2	F47G4.2	WBGene00009823	chrI	chrI:14075823-14082369	19.4547	0.490927	-5.30846	0.0239174	yes
F47G4.4	F47G4.4	WBGene00009825	chrI	chrI:14062736-14068797	5.21362	0.0144238	-8.4977	0.0452998	yes
F48E3.3	F48E3.3	WBGene00018604	chrX	chrX:7495638-7500931	29.5192	5.71282	-2.36938	0.025411	yes
F48E3.6	F48E3.6	WBGene00018606	chrX	chrX:7501190-7502587	24.364	0.465141	-5.71094	0.00917146	yes
F49E12.6	F49E12.6	WBGene00009899	chrII	chrII:8412619-8416799	25.9663	0.0384693	-9.39872	0.00871324	yes
F52B5.7	F52B5.7	WBGene00009923	chrI	chrI:8313220-8315337	34.1399	0.882003	-5.27453	0.0104603	yes
F52C6.14	F52C6.14	WBGene00018671	chrII	chrII:1931149-1934512	1.42913	21.5148	3.91211	0.00323902	yes
F52G3.1	F52G3.1	WBGene00018710	chrX	chrX:16963795-16972739	23.3113	1.3017	-4.16256	0.00029495	yes
F52H2.7	F52H2.7	WBGene00018719	chrX	chrX:2566549-2572646	9.92151	0.00930468	-10.0584	0.000328374	yes
F53B1.2	F53B1.2	WBGene00018735	chrX	chrX:2108975-2111714	4.98349	0.00690671	-9.49494	0.0345335	yes
F53G2.1	F53G2.1	WBGene00018766	chrII	chrII:2488758-2496646	6.27257	0.00644413	-9.92685	0.0245578	yes
F54B11.5	F54B11.5	WBGene00010028	chrX	chrX:13594061-13595997	30.2297	3.23036	-3.2262	0.0278504	yes
F55A12.10	F55A12.10	WBGene00018867	chrI	chrI:5367012-5367832	42.9808	191.166	2.15306	0.0250212	yes
F55G1.6	F55G1.6	WBGene00018902	chrIV	chrIV:7473505-7474942	127.978	633.034	2.30638	0.0135108	yes
F56A11.5	F56A11.5	WBGene00018925	chrIV	chrIV:568372-570843	11.6358	0.0235378	-8.94938	0.0405004	yes
F56F10.4	F56F10.4	WBGene00018987	chrX	chrX:864739-871078	4.66164	0.0110765	-8.7172	0.036887	yes
F56H1.7	F56H1.7	WBGene00045483	chrI	chrI:5760899-5762438	76.6389	808.642	3.39935	5.69e-06	yes
F57C7.1	F57C7.1	WBGene00010199	chrX	chrX:10569210-10575656	13.6232	0.803535	-4.08356	0.00885606	yes
F57G12.1	F57G12.1	WBGene00010221	chrX	chrX:12169030-12171615	21.0267	0.0224856	-9.869	0.000615861	yes
F59C12.3	F59C12.3	WBGene00019102	chrX	chrX:16603312-16609451	7.1289	0.0421601	-7.40166	0.0281826	yes
C56E6.2	C56E6.2	WBGene00016970	chrII	chrII:6524894-6526301	16.4356	0.630409	-4.70439	0.036887	yes
H21P03.2	H21P03.2	WBGene00010409	chrIV	chrIV:11480830-11482391	64.9516	241.924	1.89712	0.0337948	yes
H28G03.1	H28G03.1	WBGene00019249	chrX	chrX:5216326-5219052	24.0723	0.189386	-6.9899	0.00636266	yes
H28G03.2	H28G03.2	WBGene00019250	chrX	chrX:5205739-5216202	16.6686	0.115869	-7.1685	0.0318697	yes
H43I07.1	H43I07.1	WBGene00019274	chrV	chrV:4204775-4208352	22.5989	104.118	2.20389	0.0306398	yes
K02B12.2	K02B12.2	WBGene00010495	chrI	chrI:8511701-8512397	44.9152	0.37039	-6.92202	0.0459936	yes
K02E10.1	K02E10.1	WBGene00019317	chrX	chrX:2496174-2500926	26.8401	0.281187	-6.57672	0.0265163	yes
K04B12.2	K04B12.2	WBGene00010550	chrII	chrII:14434375-14438901	18.0865	1.7752	-3.34886	0.0489042	yes
K07A1.17	K07A1.17	WBGene00044987	chrI	chrI:9581872-9582571	69.7319	276.681	1.98833	0.0330087	yes
K07E3.1	K07E3.1	WBGene00019490	chrX	chrX:8110399-8114697	5.4087	0.0170311	-8.31097	0.0297534	yes
K07E3.4	K07E3.4	WBGene00019492	chrX	chrX:8080825-8083969	21.3563	2.31978	-3.2026	0.0390274	yes
K08A2.1	K08A2.1	WBGene00019511	chrII	chrII:2997023-3000656	43.6647	4.10274	-3.41181	0.0134427	yes
K09C4.10	K09C4.10	WBGene00019554	chrX	chrX:3276040-3280187	10.7055	0	-1.79769e+308	0.0424765	yes
K09E9.3	K09E9.3	WBGene00010726	chrX	chrX:15611776-15613723	23.5913	1.92777	-3.61326	0.0166732	yes
K09F5.6	K09F5.6	WBGene00044698	chrX	chrX:7719220-7725466	3.05092	0.0127562	-7.9019	0.0140316	yes
K10D3.4	K10D3.4	WBGene00010738	chrI	chrI:7134736-7139972	22.7104	1.12803	-4.33148	0.000560756	yes
K10G6.4	K10G6.4	WBGene00019641	chrII	chrII:3972822-3974971	13.2709	0.0106177	-10.2876	0.0194277	yes
K11H3.4	K11H3.4	WBGene00010781	chrIII	chrIII:9832847-9838224	16.9003	60.4937	1.83974	0.0484205	yes
M02D8.3	M02D8.3	WBGene00019729	chrX	chrX:8732967-8736954	13.3557	1.27318	-3.39095	0.0135209	yes
M05D6.6	M05D6.6	WBGene00010879	chrII	chrII:8482324-8483821	34.4285	158.634	2.20403	0.0181093	yes
R03E9.2	R03E9.2	WBGene00019843	chrX	chrX:6729957-6733250	12.0965	0.0170992	-9.46645	0.0194277	yes
R04D3.2	R04D3.2	WBGene00011010	chrX	chrX:13285070-13286564	159.601	15.549	-3.35958	0.000615861	yes
R04E5.9	R04E5.9	WBGene00019872	chrX	chrX:8806062-8810982	17.3124	1.23845	-3.8052	0.0371795	yes
R05G6.4	R05G6.4	WBGene00019898	chrIV	chrIV:7513219-7516256	21.8644	98.6761	2.17411	0.025411	yes
R06C7.2	R06C7.2	WBGene00011062	chrI	chrI:7233657-7234499	55.7433	307.82	2.46522	0.00451507	yes
R90.1	R90.1	WBGene00011283	chrV	chrV:12891510-12895856	12.863	0.730749	-4.13771	0.0197437	yes
T02E9.5	T02E9.5	WBGene00011383	chrV	chrV:11342223-11344717	44.527	1.90185	-4.54921	0.0230698	yes
T02G6.5	T02G6.5	WBGene00011388	chrI	chrI:11817231-11819224	31.3624	2.63516	-3.57307	0.0253361	yes
T03F1.6	T03F1.6	WBGene00020188	chrI	chrI:3839878-3841542	40.1821	0.0954807	-8.71713	0.0157157	yes
T03G11.6	T03G11.6	WBGene00020199	chrX	chrX:5177495-5179166	261.007	0.56709	-8.8463	1.54e-05	yes
T04D3.5	T04D3.5	WBGene00011434	chrI	chrI:13325607-13333325	436.999	6.52297	-6.06596	1.33e-05	yes
T05H10.4	T05H10.4	WBGene00011509	chrII	chrII:8053084-8054913	39.6421	0.0865476	-8.83932	0.000319158	yes
T07D3.9	T07D3.9	WBGene00020311	chrII	chrII:898065-900744	8.23062	0.0358677	-7.84217	0.0489042	yes
T09A5.7	T09A5.7	WBGene00011635	chrII	chrII:7855081-7855669	68.7596	271.49	1.98127	0.0453067	yes
T09B9.4	T09B9.4	WBGene00011645	chrX	chrX:9771655-9774296	130.727	2.55375	-5.6778	4.85e-06	yes
T10B10.3	T10B10.3	WBGene00011680	chrX	chrX:15173833-15181397	21.4799	0.487789	-5.46059	0.00520025	yes
T11F8.1	T11F8.1	WBGene00020433	chrIV	chrIV:5479583-5480569	42.1265	0.107851	-8.60954	0.0076852	yes
T12D8.8	T12D8.8	WBGene00011735	chrIII	chrIII:13614609-13622388	64.2073	240.387	1.90455	0.0476648	yes
T12G3.1	T12G3.1	WBGene00011737	chrIV	chrIV:12034229-12037027	18.8741	2.82151	-2.74187	0.0244892	yes
T14B4.3	T14B4.3	WBGene00020500	chrII	chrII:6734866-6736057	85.347	335.241	1.97379	0.0274145	yes
T16H12.1	T16H12.1	WBGene00011811	chrIII	chrIII:10083548-10085972	8.9556	49.9112	2.4785	0.0318596	yes
T18D3.1	T18D3.1	WBGene00011820	chrX	chrX:12454676-12457876	10.3539	0.0212755	-8.92677	0.00338616	yes
T21B4.17	T21B4.17	WBGene00044032	chrII	chrII:12520147-12524413	40.7172	4.84032	-3.07246	0.0125897	yes
T21C9.13	T21C9.13	WBGene00011898	chrV	chrV:10597293-10598643	58.8166	366.603	2.63992	0.0013057	yes
T22D1.5	T22D1.5	WBGene00020684	chrIV	chrIV:6903941-6905534	18.6123	88.9872	2.25734	0.0148421	yes
T23F2.5	T23F2.5	WBGene00020738	chrX	chrX:5516674-5517121	121.05	0.620649	-7.60761	0.0104542	yes
T24B8.3	T24B8.3	WBGene00011977	chrII	chrII:9059327-9061078	108.526	3.81422	-4.83051	0.00914003	yes
T24C4.2	T24C4.2	WBGene00020758	chrIII	chrIII:867501-869850	26.3099	0.0704311	-8.54518	0.0213856	yes
T25E12.6	T25E12.6	WBGene00012021	chrV	chrV:16742468-16744790	29.9373	0.938586	-4.99531	0.0137401	yes
T25G12.11	T25G12.11	WBGene00020817	chrX	chrX:17236827-17237781	15.065	0.0320179	-8.8781	0.0423735	yes
T25G3.3	T25G3.3	WBGene00012030	chrI	chrI:7559832-7562338	78.1768	286.2	1.87221	0.0444267	yes
T26C11.4	T26C11.4	WBGene00020830	chrX	chrX:1840560-1845531	6.78183	0.0320989	-7.72301	0.0176175	yes
T27A1.2	T27A1.2	WBGene00020834	chrII	chrII:530895-533182	21.3736	0	-1.79769e+308	0.0486055	yes
T27A1.3	T27A1.3	WBGene00020835	chrII	chrII:535576-538308	10.4062	0.0179359	-9.18038	0.0476648	yes
T28B11.1	T28B11.1	WBGene00012117	chrV	chrV:10713110-10732402	59.5155	336.494	2.49924	0.00498724	yes
T28B8.1	T28B8.1	WBGene00012113	chrI	chrI:8133885-8135034	48.6686	4.52318	-3.42758	0.00873662	yes
T28C6.9	T28C6.9	WBGene00044793	chrIV	chrIV:8831599-8840669	5.64026	0.134482	-5.39028	0.0144772	yes
W01A11.2	W01A11.2	WBGene00020910	chrV	chrV:6497092-6498469	22.3784	105.507	2.23716	0.0147756	yes
W03F8.10	W03F8.10	WBGene00020998	chrIV	chrIV:5180180-5183700	18.0304	0.618406	-4.86573	0.00396401	yes
W03F9.1	W03F9.1	WBGene00020999	chrV	chrV:124045-126745	31.0484	213.625	2.78249	0.000503105	yes
W03G9.8	W03G9.8	WBGene00044431	chrI	chrI:4957776-4958310	122.566	607.356	2.30899	0.00842836	yes
W04A8.4	W04A8.4	WBGene00012239	chrI	chrI:13841882-13843234	332.186	3.91448	-6.40703	1.42e-07	yes
W04D2.5	W04D2.5	WBGene00012244	chrV	chrV:12493220-12494605	88.5566	350.388	1.98428	0.0274145	yes
W05H9.3	W05H9.3	WBGene00021050	chrX	chrX:6252239-6253743	130.65	12.654	-3.36805	0.00107809	yes
W05H9.4	W05H9.4	WBGene00021051	chrX	chrX:6263611-6266873	15.5234	0.791265	-4.29414	0.00917146	yes
W06B4.1	W06B4.1	WBGene00021056	chrII	chrII:4471400-4473552	12.957	58.9754	2.18638	0.0285674	yes
W07E6.5	W07E6.5	WBGene00021076	chrII	chrII:476554-477795	115.192	450.255	1.9667	0.0362411	yes
W08E12.1	W08E12.1	WBGene00021082	chrIV	chrIV:3311272-3313177	102.667	387.267	1.91536	0.036887	yes
Y102A11A.8	Y102A11A.8	WBGene00022418	chrX	chrX:2039415-2046340	25.4356	0.492568	-5.69038	0.00842836	yes
Y105C5A.14	Y105C5A.14	WBGene00013638	chrIV	chrIV:15646121-15648080	17.0861	0.227016	-6.23389	0.0371795	yes
Y105C5B.19	Y105C5B.19	WBGene00013658	chrIV	chrIV:15981540-15983938	9.87834	0.0246581	-8.64606	0.0394414	yes
Y113G7B.17	Y113G7B.17	WBGene00013766	chrV	chrV:20267333-20269682	131.452	482.062	1.87468	0.0476648	yes
Y17G9B.9	Y17G9B.9	WBGene00021206	chrIV	chrIV:4758975-4760420	61.105	222.165	1.86227	0.0393041	yes
Y34B4A.8	Y34B4A.8	WBGene00021324	chrX	chrX:5271810-5275250	9.29469	0.0209542	-8.79302	0.0274145	yes
Y43F8B.2	Y43F8B.2	WBGene00012813	chrV	chrV:19503081-19533080	737.397	15.3297	-5.58803	0.000328374	yes
Y46E12BL.3	Y46E12BL.3	WBGene00021596	chrII	chrII:15230285-15232722	660.996	19.7179	-5.06706	0.000894447	yes
Y46G5A.7	Y46G5A.7	WBGene00012899	chrII	chrII:12755147-12756125	38.6282	1.3003	-4.89274	0.0129603	yes
Y46G5A.8	Y46G5A.8	WBGene00012900	chrII	chrII:12756282-12757565	28.233	0.497681	-5.82602	0.034341	yes
Y47G6A.17	Y47G6A.17	WBGene00021643	chrI	chrI:3487863-3499709	4.13247	0.232206	-4.15353	0.032864	yes
Y47G7B.2	Y47G7B.2	WBGene00021654	chrII	chrII:2706000-2707987	15.2575	152.589	3.32206	3.98e-05	yes
Y4C6A.3	Y4C6A.3	WBGene00021153	chrIV	chrIV:5450984-5452417	525.341	8.01256	-6.03485	0.000156449	yes
Y50D4A.5	Y50D4A.5	WBGene00021739	chrV	chrV:1207309-1207777	38.0291	240.35	2.65996	0.0155455	yes
Y53C12B.2	Y53C12B.2	WBGene00013144	chrII	chrII:9738922-9742825	85.064	400.469	2.23507	0.0103693	yes
Y54F10BM.3	Y54F10BM.3	WBGene00021858	chrIII	chrIII:2277267-2289956	3.10626	22.3434	2.8466	0.0176561	yes
Y54G2A.36	Y54G2A.36	WBGene00021898	chrIV	chrIV:2896967-2901646	125.124	589.2	2.2354	0.0125897	yes
Y54G2A.40	Y54G2A.40	WBGene00044495	chrIV	chrIV:2846541-2851280	4.88821	33.7875	2.78911	0.00970641	yes
Y55D5A.2	Y55D5A.2	WBGene00021916	chrIII	chrIII:2968957-2969869	134.662	671.273	2.31756	0.0220142	yes
Y55F3AR.2	Y55F3AR.2	WBGene00021933	chrIV	chrIV:1094549-1096558	1.43375	29.4818	4.36196	0.0302402	yes
Y62E10A.14	Y62E10A.14	WBGene00013380	chrIV	chrIV:13399075-13400484	52.6255	423.189	3.00747	0.000108109	yes
Y62F5A.12	Y62F5A.12	WBGene00077453	chrII	chrII:11533966-11534413	29.2034	215.761	2.88522	0.017549	yes
Y71A12B.12	Y71A12B.12	WBGene00013509	chrI	chrI:14004446-14008459	35.3821	1.76706	-4.3236	0.0104542	yes
Y73B3A.18	Y73B3A.18	WBGene00022219	chrX	chrX:57928-60781	112.893	466.678	2.04747	0.0206979	yes
Y73C8B.3	Y73C8B.3	WBGene00022260	chrV	chrV:3191299-3193231	6.69256	0.0702343	-6.57424	0.0341404	yes
Y7A9D.1	Y7A9D.1	WBGene00012420	chrIV	chrIV:16381360-16382179	87.5888	1.37351	-5.99481	0.00498724	yes
Y82E9BR.1	Y82E9BR.1	WBGene00022334	chrIII	chrIII:1458224-1466724	11.2862	0.0133406	-9.72451	0.0211067	yes
Y82E9BR.2	Y82E9BR.2	WBGene00022335	chrIII	chrIII:1439087-1443182	27.0067	110.549	2.03329	0.0220142	yes
Y94H6A.3	Y94H6A.3	WBGene00022376	chrIV	chrIV:2676509-2678447	85.6218	317.698	1.89161	0.0361835	yes
Y9D1A.1	Y9D1A.1	WBGene00021186	chrII	chrII:7446145-7448499	32.6899	1.6627	-4.29725	0.0266302	yes
ZC123.3	ZC123.3	WBGene00022518	chrI	chrI:803370-835287	2.69751	0.0384028	-6.13427	0.017549	yes
ZC155.4	ZC155.4	WBGene00022532	chrIII	chrIII:5211967-5214966	51.456	250.912	2.28577	0.00614948	yes
ZC204.2	ZC204.2	WBGene00022554	chrII	chrII:1663802-1665769	90.0268	2.40799	-5.22445	4.65e-05	yes
ZC308.4	ZC308.4	WBGene00022586	chrI	chrI:6368272-6369600	91.6532	5.25417	-4.12465	0.0103466	yes
ZC373.1	ZC373.1	WBGene00013866	chrX	chrX:10054222-10057466	10.695	0.180004	-5.89277	0.0152273	yes
ZC449.5	ZC449.5	WBGene00022615	chrX	chrX:5034996-5037744	5.19424	0.005874	-9.78835	0.0288537	yes
ZC53.1	ZC53.1	WBGene00022508	chrX	chrX:1911394-1913250	9.01681	0.0091637	-9.94247	0.0267801	yes
ZK1053.4	ZK1053.4	WBGene00014199	chrI	chrI:13241652-13244719	8.67082	0.0169981	-8.99466	0.00220823	yes
ZK287.1	ZK287.1	WBGene00013962	chrV	chrV:9666675-9670029	9.42966	0.0201858	-8.86772	0.0337766	yes
ZK418.8	ZK418.8	WBGene00022737	chrIII	chrIII:7083622-7084999	81.339	333.425	2.03534	0.0200597	yes
ZK512.1	ZK512.1	WBGene00013982	chrIII	chrIII:9115004-9117193	29.5487	0.140842	-7.71287	0.0405098	yes
ZK632.10	ZK632.10	WBGene00014017	chrIII	chrIII:9826042-9827064	25.1219	137.403	2.45139	0.00897658	yes
ZK632.4	ZK632.4	WBGene00014013	chrIII	chrIII:9805427-9807367	26.1421	96.0581	1.87753	0.0453067	yes
ZK829.9	ZK829.9	WBGene00014097	chrIV	chrIV:11970510-11972629	31.4326	0.00734472	-12.0633	0.0035654	yes
aat-2	F07C3.7	WBGene00000003	chrV	chrV:9244388-9246337	7.26524	0.0199824	-8.50613	0.0452998	yes
aat-3	F52H2.2	WBGene00000004	chrX	chrX:2554223-2557707	11.0935	0.740781	-3.90453	0.0476648	yes
adpr-1	Y73E7A.9	WBGene00044440	chrI	chrI:1610391-1619945	3.49171	22.3681	2.67944	0.0405004	yes
ain-1	C06G1.4	WBGene00015547	chrX	chrX:16613375-16617594	25.7402	0.838388	-4.94026	0.000175072	yes
alg-1	F48F7.1	WBGene00000105	chrX	chrX:13951192-13956187	7.28327	0.0930828	-6.28993	0.0176557	yes
anc-1	ZK973.6	WBGene00000140	chrI	chrI:4321095-4359081	7.58654	1.15908	-2.71046	0.00878235	yes
apa-2	T20B5.1	WBGene00000161	chrX	chrX:9336759-9343006	5.55018	0.0516935	-6.74641	0.0197437	yes
apl-1	C42D8.8	WBGene00000149	chrX	chrX:5112392-5116839	10.8578	0.89162	-3.60616	0.0258393	yes
aps-1	F29G9.3	WBGene00000159	chrV	chrV:6017952-6018856	43.5347	187.373	2.10568	0.0305648	yes
aqp-2	C01G6.1	WBGene00000170	chrII	chrII:9258991-9261934	129.151	4.11401	-4.97237	0.000328374	yes
asp-4	R12H7.2	WBGene00000217	chrX	chrX:13218909-13221400	64.6647	6.09125	-3.40817	0.00148759	yes
ast-1	T08H4.3	WBGene00020368	chrII	chrII:4127866-4134870	23.3111	0	-1.79769e+308	0.0323517	yes
atg-11	T08A9.1	WBGene00020334	chrX	chrX:7334756-7340143	20.8602	0.479638	-5.44266	0.000117367	yes
atg-2	M03A8.2	WBGene00019748	chrX	chrX:6809064-6817168	11.6772	0.630355	-4.21139	0.000328374	yes
bath-13	F40B1.1	WBGene00018223	chrII	chrII:2520969-2522049	10.2915	55.5861	2.43327	0.0466764	yes
bath-36	Y75B12B.4	WBGene00013569	chrV	chrV:15188428-15190909	135.14	856.982	2.66481	0.00535019	yes
bath-38	F52H3.3	WBGene00009945	chrII	chrII:10042935-10045130	58.306	4.87392	-3.58049	0.00245142	yes
bed-2	Y47D3B.9	WBGene00012943	chrIII	chrIII:11463564-11470705	5.54912	0.0766494	-6.17784	0.0257242	yes
cab-1	C23H4.1	WBGene00000277	chrX	chrX:12199495-12212981	25.1903	2.34803	-3.42334	0.00451507	yes
calu-1	M03F4.7	WBGene00019760	chrX	chrX:4969505-4970880	109.383	0.70427	-7.27904	0.00696121	yes
cam-1	C01G6.8	WBGene00000289	chrII	chrII:9295859-9310244	61.8225	0.20027	-8.27004	0.000112942	yes
cav-1	T13F2.8	WBGene00000301	chrIV	chrIV:9772489-9773450	129.316	2.33888	-5.78893	0.000175072	yes
cdc-25.1	K06A5.7	WBGene00000386	chrI	chrI:6469387-6471953	100.835	10.0653	-3.32454	0.00748934	yes
cdh-3	ZK112.7	WBGene00000395	chrIII	chrIII:7741260-7754383	1.69749	0.00225103	-9.55861	0.0245578	yes
cdh-4	F25F2.2	WBGene00000396	chrIII	chrIII:4520426-4536957	19.223	0.478724	-5.3275	5.33e-06	yes
cdh-6	F15B9.7	WBGene00001475	chrV	chrV:13019052-13033358	11.6072	0.0782715	-7.21231	0.000500538	yes
cec-1	ZK1236.2	WBGene00000414	chrIII	chrIII:8426264-8428509	27.3076	0.437172	-5.96496	0.0288537	yes
ced-11	ZK512.3	WBGene00000425	chrIII	chrIII:9119481-9125076	5.22831	0.0261656	-7.64253	0.034341	yes
ceh-21	T26C11.6	WBGene00000444	chrX	chrX:1849625-1852732	12.5197	0.315452	-5.31064	0.0489042	yes
ceh-27	F46F3.1	WBGene00000449	chrV	chrV:11661651-11664679	33.3141	0.579705	-5.84467	0.0279681	yes
ceh-32	W05E10.3	WBGene00000453	chrV	chrV:11701742-11705383	13.7919	0.30805	-5.48452	0.041855	yes
ceh-34	C10G8.6	WBGene00000455	chrV	chrV:5314387-5319561	24.1929	0.801973	-4.91489	0.0469196	yes
ces-2	ZK909.4	WBGene00000469	chrI	chrI:14961510-14965341	23.5003	0.0870221	-8.07708	0.0374118	yes
chd-3	T14G8.1	WBGene00000482	chrX	chrX:12846362-12852531	18.5795	0.186695	-6.63689	0.000252557	yes
cht-1	C04F6.3	WBGene00000503	chrX	chrX:3397593-3400007	14.9987	0.492687	-4.92802	0.0105575	yes
chtl-1	F35C8.7	WBGene00018037	chrX	chrX:5355605-5364290	21.3518	0.0246293	-9.75977	0.0194277	yes
cki-1	T05A6.1	WBGene00000516	chrII	chrII:7811188-7812049	19.6014	0.292758	-6.0651	0.0303719	yes
clec-266	C25B8.4	WBGene00016088	chrX	chrX:6617403-6627938	407.518	2.47726	-7.36197	8.99e-05	yes
clp-6	Y77E11A.10	WBGene00000546	chrIV	chrIV:1429564-1434983	3.01529	18.7204	2.63425	0.0262535	yes
coh-1	K08A8.3	WBGene00000591	chrX	chrX:7465208-7475249	12.5807	0.00810366	-10.6004	0.000125045	yes
cpg-3	R06C7.4	WBGene00011063	chrI	chrI:7244934-7246094	65.0816	330.865	2.34592	0.00476068	yes
crb-1	F11C7.4	WBGene00000792	chrX	chrX:17401497-17413776	4.03248	0.00894053	-8.81709	0.0489042	yes
cri-3	F59A2.3	WBGene00010303	chrIII	chrIII:3396572-3397664	101.368	365.263	1.84933	0.0416759	yes
crn-4	AH9.2	WBGene00000797	chrX	chrX:2256081-2258073	18.4166	0.0153737	-10.2263	0.0210772	yes
cutl-9	M28.1	WBGene00010893	chrII	chrII:10622221-10626375	5.42135	0.0409787	-7.04763	0.0218378	yes
cyd-1	Y38F1A.5	WBGene00000870	chrII	chrII:12980521-12993049	12.5408	0.0703802	-7.47724	0.00498724	yes
dep-1	F44G4.8	WBGene00009717	chrII	chrII:9005733-9019705	5.49464	0.13996	-5.29494	0.0391516	yes
dgk-2	F46H6.2	WBGene00000959	chrX	chrX:4494887-4504362	13.3871	0.461022	-4.85986	0.0476648	yes
dgn-1	T21B6.1	WBGene00000961	chrX	chrX:10920452-10928919	11.4486	0.0264553	-8.7574	0.0210772	yes
die-1	C18D1.1	WBGene00000995	chrII	chrII:10061245-10074384	11.5072	0.0133048	-9.75637	0.000811818	yes
din-1	F07A11.6	WBGene00008549	chrII	chrII:11614572-11633545	23.7918	1.26552	-4.23266	0.00842836	yes
dlc-1	T26A5.9	WBGene00001005	chrIII	chrIII:6462854-6463727	483.561	81.6075	-2.56692	0.0113376	yes
dlg-1	C25F6.2	WBGene00001006	chrX	chrX:5479667-5484904	18.0732	0.347666	-5.70001	0.0152991	yes
dnj-26	Y39C12A.8	WBGene00001044	chrIV	chrIV:12251225-12252626	18.1559	94.6494	2.38216	0.0117436	yes
dnj-7	C55B6.2	WBGene00001025	chrX	chrX:7194520-7198236	26.6254	1.9681	-3.75793	0.00451507	yes
dpy-14	H27M09.4	WBGene00001075	chrI	chrI:6843593-6845133	170.014	8.41729	-4.33616	3.7e-05	yes
dpy-17	F54D8.1	WBGene00001076	chrIII	chrIII:5107288-5108460	30.3193	3.66897	-3.04679	0.0288537	yes
dpy-18	Y47D3B.10	WBGene00001077	chrIII	chrIII:11372781-11378354	12.184	0.486218	-4.64724	0.0250591	yes
dpy-22	F47A4.2	WBGene00001081	chrX	chrX:9810172-9822112	12.5605	0.355192	-5.14415	1.33e-05	yes
dpy-27	R13G10.1	WBGene00001086	chrIII	chrIII:3813534-3819661	15.3298	1.31612	-3.54198	0.00174269	yes
dre-1	K04A8.6	WBGene00001089	chrV	chrV:6533597-6538045	6.39709	0.0765136	-6.38556	0.00987299	yes
drr-2	T12D8.2	WBGene00011730	chrIII	chrIII:13642332-13643475	51.1866	185.501	1.85759	0.0429072	yes
dyrb-1	T24H10.6	WBGene00012004	chrII	chrII:9106451-9107083	74.141	305.801	2.04425	0.0489042	yes
egl-46	K11G9.4	WBGene00001210	chrV	chrV:6679129-6681558	17.7142	0.05202	-8.41163	0.0271221	yes
egl-9	F22E12.4	WBGene00001178	chrV	chrV:10468387-10476929	45.461	0.0273947	-10.6965	0.00353612	yes
elks-1	F42A6.9	WBGene00018330	chrIV	chrIV:3342522-3350015	25.8218	0.855666	-4.9154	0.00042244	yes
emb-9	K04H4.1	WBGene00001263	chrIII	chrIII:9336803-9344363	19.2979	3.24207	-2.57346	0.0445708	yes
ent-2	K09A9.3	WBGene00010701	chrX	chrX:15600996-15603695	26.0274	1.75337	-3.89183	0.0102234	yes
eor-2	C44H4.7	WBGene00001325	chrX	chrX:14602996-14608587	13.3804	0.0229338	-9.18843	0.0148924	yes
epi-1	K08C7.3	WBGene00001328	chrIV	chrIV:10666806-10679269	12.9072	0.660564	-4.28834	0.000643945	yes
epn-1	T04C10.2	WBGene00001329	chrX	chrX:14815731-14818438	14.3232	1.36051	-3.39614	0.0456542	yes
erd-2	F09B9.3	WBGene00001331	chrX	chrX:10156798-10160379	39.1554	0.587363	-6.05881	0.00148759	yes
erp-1	F35A5.8	WBGene00001335	chrX	chrX:3800028-3802751	13.5039	0.0665798	-7.66408	0.0261457	yes
evl-20	F22B5.1	WBGene00001358	chrII	chrII:8444255-8445054	27.9305	136.251	2.28635	0.0391516	yes
fasn-1	F32H2.5	WBGene00009342	chrI	chrI:8975372-8986515	9.72288	0.174608	-5.79919	0.000359793	yes
fbxa-106	Y59A8B.11	WBGene00013348	chrV	chrV:18082406-18083417	74.0256	328.045	2.1478	0.0131836	yes
fbxa-107	Y37H2A.4	WBGene00012564	chrV	chrV:18123948-18125138	108.995	437.752	2.00585	0.0274926	yes
fbxa-108	F59A1.7	WBGene00010293	chrV	chrV:17656924-17658137	66.9843	237.686	1.82716	0.0466764	yes
fbxa-94	F28F8.8	WBGene00009225	chrV	chrV:15572914-15574087	42.0043	327.295	2.96198	0.000125045	yes
fbxa-95	F28F8.4	WBGene00009222	chrV	chrV:15571469-15572650	144.283	750.287	2.37854	0.00440194	yes
fbxb-41	M01D1.8	WBGene00019703	chrII	chrII:1041370-1042309	13.3569	0.0489932	-8.09078	0.00878235	yes
fbxb-66	Y40B1B.3	WBGene00044066	chrI	chrI:13424019-13425133	28.2177	0.0404294	-9.44698	0.000968224	yes
fbxb-88	C33F10.13	WBGene00016359	chrII	chrII:4826501-4827842	33.5702	0.57209	-5.87479	0.0215524	yes
fbxc-19	T08E11.5	WBGene00020361	chrII	chrII:1821031-1823040	5.10196	0.0341019	-7.22506	0.017549	yes
fbxc-24	R07C3.11	WBGene00019927	chrII	chrII:907541-908788	20.3572	0.100466	-7.6627	0.0369833	yes
fbxc-34	R07C3.5	WBGene00019921	chrII	chrII:931190-932334	14.2714	0.0299885	-8.8945	0.0417822	yes
fbxc-45	Y54G2A.22	WBGene00021887	chrIV	chrIV:2919860-2922227	23.4622	103.508	2.14134	0.0241613	yes
fbxc-51	Y46B2A.1	WBGene00021576	chrII	chrII:868820-871696	18.7479	0.184055	-6.67045	0.00520025	yes
fhod-1	C46H11.11	WBGene00016735	chrI	chrI:5058253-5068832	7.91705	0.511095	-3.9533	0.0176175	yes
flh-2	C26E6.2	WBGene00016138	chrIII	chrIII:4952085-4955076	13.1335	0.710016	-4.20926	0.022608	yes
flna-1	C23F12.1	WBGene00016006	chrX	chrX:9412616-9427191	4.95434	0.256123	-4.27378	0.00914003	yes
flt-1	ZK783.4	WBGene00001470	chrIII	chrIII:7650501-7655967	11.2941	0.0638684	-7.46625	0.00167172	yes
fox-1	T07D1.4	WBGene00001484	chrX	chrX:2445491-2450500	13.4156	0.196822	-6.09088	0.0142454	yes
frm-2	T04C9.6	WBGene00001489	chrIII	chrIII:5976732-5982077	13.8861	0.0873742	-7.31222	0.0141412	yes
ftt-2	F52D10.3	WBGene00001502	chrX	chrX:11603643-11605354	223.804	3.82282	-5.87145	2.41e-06	yes
K10C2.4	K10C2.4	WBGene00019620	chrX	chrX:6444151-6448962	15.6944	0.669818	-4.55034	0.044845	yes
gas-1	K09A9.5	WBGene00001520	chrX	chrX:15586745-15590329	48.8871	3.19316	-3.9364	0.000615861	yes
gck-4	C04A11.3	WBGene00007287	chrX	chrX:13677189-13682008	6.73644	0.173634	-5.27787	0.0453067	yes
gex-2	F56A11.1	WBGene00001579	chrIV	chrIV:572722-583731	12.0348	0.655122	-4.19931	0.00816006	yes
gfi-3	M163.4	WBGene00001583	chrX	chrX:14480501-14484586	19.7999	0.968775	-4.35319	0.0025639	yes
gln-5	F26D10.10	WBGene00001606	chrIV	chrIV:17272219-17273615	26.8475	137.281	2.35426	0.00945977	yes
R04B3.2	R04B3.2	WBGene00019867	chrX	chrX:2471531-2473666	15.021	0.681349	-4.46244	0.044845	yes
gosr-2.2	CBG09355	WBGene00030954	chrV	chrV:5618332-5620124	76.2498	290.863	1.93153	0.0310472	yes
grk-1	F19C6.1	WBGene00001708	chrX	chrX:9991223-9999120	8.23062	0.00420896	-10.9333	0.0106692	yes
gsa-1	R06A10.2	WBGene00001745	chrI	chrI:1068593-1075013	18.8379	1.0276	-4.19629	0.00533704	yes
gst-7	F11G11.2	WBGene00001755	chrII	chrII:4882065-4883355	56.133	5.08594	-3.46426	0.0153673	yes
gut-2	T10G3.6	WBGene00001808	chrV	chrV:13497689-13511705	185.822	712.342	1.93865	0.0324001	yes
ham-1	F53B2.6	WBGene00001820	chrIV	chrIV:12542010-12545701	36.7785	0.714063	-5.68667	0.00180127	yes
hbl-1	F13D11.2	WBGene00001824	chrX	chrX:5823032-5827705	11.0847	0.0722832	-7.26069	0.0415356	yes
hex-2	C14C11.3	WBGene00015767	chrV	chrV:5654430-5658671	2.5839	0.0211488	-6.93283	0.044845	yes
hex-3	Y39A1C.4	WBGene00012663	chrIII	chrIII:10849153-10854462	5.48825	26.602	2.27711	0.0351472	yes
hil-2	Y73B6BL.9	WBGene00001853	chrIV	chrIV:6294114-6295199	623.682	6.20887	-6.65034	5.86e-05	yes
hil-3	F22F1.1	WBGene00001854	chrX	chrX:8159104-8160035	315.296	1.84954	-7.4134	4.61e-06	yes
him-5	D1086.4	WBGene00001864	chrV	chrV:14090798-14092417	90.5246	571.855	2.65927	0.000669905	yes
his-24	M163.3	WBGene00001898	chrX	chrX:14490036-14491041	544.977	4.28863	-6.98953	1.23e-07	yes
his-32	F17E9.10	WBGene00001906	chrIV	chrIV:8334284-8334752	43.2894	0.76023	-5.83143	0.025229	yes
his-72	Y49E10.6	WBGene00001946	chrIII	chrIII:12367373-12368065	212.602	33.5671	-2.66304	0.00891052	yes
hke-4.2	H13N06.5	WBGene00006494	chrX	chrX:15505966-15507812	21.9567	2.19475	-3.32254	0.0264262	yes
hlh-1	B0304.1	WBGene00001948	chrII	chrII:4519065-4522454	15.0606	0.0439465	-8.42081	0.0469197	yes
hnd-1	C44C10.8	WBGene00001981	chrX	chrX:11684660-11685579	59.4677	2.98557	-4.31603	0.0261792	yes
hpk-1	F20B6.8	WBGene00001994	chrX	chrX:4210558-4217266	47.9797	1.4883	-5.01068	0.00221552	yes
hsp-16.2	Y46H3A.3	WBGene00002016	chrV	chrV:1804439-1804970	1079.78	26.2579	-5.36185	1.49e-06	yes
hsp-16.41	Y46H3A.2	WBGene00002018	chrV	chrV:1805231-1805874	1801.52	52.7725	-5.09329	1.79e-05	yes
hsp-3	C15H9.6	WBGene00002007	chrX	chrX:6088979-6092089	70.7165	9.78651	-2.85318	0.00368785	yes
hsp-70	C12C8.1	WBGene00002026	chrI	chrI:9317727-9327204	398.031	8.04151	-5.62927	1.03e-05	yes
ift-74	C18H9.8	WBGene00016005	chrII	chrII:6679510-6682937	7.514	32.5798	2.11633	0.0472626	yes
ina-1	F54G8.3	WBGene00002081	chrIII	chrIII:9167961-9172724	9.1242	0.136611	-6.06155	0.0227063	yes
inx-2	F08G12.10	WBGene00002124	chrX	chrX:11294897-11296667	29.1148	0.0263326	-10.1107	0.000305475	yes
inx-3	F22F4.2	WBGene00002125	chrX	chrX:5996120-5998208	30.9739	0.23705	-7.02972	0.00338616	yes
Y17G9B.4	Y17G9B.4	WBGene00021201	chrIV	chrIV:4752110-4753155	188.9	831.661	2.13837	0.0155455	yes
jac-1	Y105C5B.21	WBGene00002175	chrIV	chrIV:15997825-16026815	4.70846	0.0586077	-6.32802	0.0332252	yes
lam-2	C54D1.5	WBGene00016913	chrX	chrX:7143874-7151098	3.41094	0.0347535	-6.61687	0.0489042	yes
lam-3	T22A3.8	WBGene00002248	chrI	chrI:10608454-10621417	5.5584	0.00751811	-9.53008	0.00144901	yes
lbp-1	F40F4.3	WBGene00002253	chrX	chrX:3259089-3259843	317.96	21.415	-3.89215	0.000252557	yes
ldb-1	F58A3.1	WBGene00002261	chrX	chrX:11028850-11040546	18.3946	0.0240294	-9.58027	0.0105575	yes
lea-1	K08H10.1	WBGene00002263	chrV	chrV:10020518-10031069	82.4019	568.189	2.78562	0.00783529	yes
let-19	K08F8.6	WBGene00002295	chrII	chrII:8770919-8781966	8.41971	0.252776	-5.05784	0.000405747	yes
let-2	F01G12.5	WBGene00002280	chrX	chrX:16380527-16389419	46.4402	2.50368	-4.21325	0.00313977	yes
lim-7	C04F1.3	WBGene00002989	chrI	chrI:5716678-5725359	17.7823	0.0389017	-8.83639	0.0264262	yes
lin-59	T12F5.4	WBGene00003040	chrI	chrI:3713520-3721160	18.3169	2.14424	-3.09464	0.00452467	yes
lin-66	B0513.1	WBGene00001562	chrIV	chrIV:13888063-13893954	7.46838	0.441587	-4.08003	0.027968	yes
lmp-1	C03B1.12	WBGene00003053	chrX	chrX:6376400-6377651	28.3557	0.894473	-4.98646	0.0261792	yes
lpr-3	W04G3.8	WBGene00012261	chrX	chrX:11057369-11059728	27.6521	0.0190465	-10.5036	0.000252557	yes
lrp-1	F29D11.1	WBGene00003071	chrI	chrI:7614171-7634135	1.62714	0.0961784	-4.08048	0.0240979	yes
lrp-2	T21E3.3	WBGene00003072	chrI	chrI:3935283-3953945	6.10478	0.356596	-4.09758	0.000615861	yes
lst-1	T22A3.3	WBGene00003083	chrI	chrI:10588165-10590436	214.616	2259.53	3.39619	0.0152923	yes
lsy-12	R07B5.9	WBGene00045419	chrV	chrV:9843841-9849092	15.8835	2.3755	-2.74123	0.0371795	yes
mab-20	Y71G12B.20	WBGene00003111	chrI	chrI:1644589-1651382	131.047	7.33362	-4.15942	0.00115285	yes
madf-1	Y55F3BR.5	WBGene00021942	chrIV	chrIV:830390-831896	20.5031	115.067	2.48856	0.0135209	yes
magi-1	K01A6.2	WBGene00010444	chrIV	chrIV:11713978-11729256	7.0806	0.472583	-3.90523	0.0253361	yes
mbf-1	H21P03.1	WBGene00003148	chrIV	chrIV:11479342-11480163	107.592	813.443	2.91847	0.000252557	yes
mbk-1	T04C10.1	WBGene00003149	chrX	chrX:14819842-14824471	11.1544	1.34082	-3.05642	0.0289909	yes
mca-1	W09C2.3	WBGene00003151	chrIV	chrIV:9625892-9634931	7.94575	0.462782	-4.10178	0.0134427	yes
mec-12	C44B11.3	WBGene00003175	chrIII	chrIII:3131567-3139213	14.1767	0.051506	-8.10457	0.0312954	yes
mec-7	ZK154.3	WBGene00003171	chrX	chrX:7763167-7776631	28.3624	0.603882	-5.55357	0.0212613	yes
meg-1	K02B9.1	WBGene00010492	chrX	chrX:13926973-13929563	35.8163	0.107136	-8.38504	0.00136527	yes
meg-2	K02B9.2	WBGene00010493	chrX	chrX:13923003-13926051	9.5984	0.00961357	-9.96351	0.017686	yes
mif-1	Y56A3A.3	WBGene00003234	chrIII	chrIII:11848051-11849410	49.9027	420.631	3.07537	0.000322	yes
miz-1	R13.4	WBGene00011259	chrIV	chrIV:10812388-10825928	13.9162	0.60609	-4.52109	0.0066946	yes
mls-2	C39E6.4	WBGene00003377	chrX	chrX:4758773-4761582	7.26032	0.021719	-8.38493	0.00616004	yes
mnp-1	B0285.7	WBGene00007139	chrIII	chrIII:4356510-4364944	30.2604	0.912945	-5.05076	0.000156449	yes
mrp-1	F57C12.5	WBGene00003407	chrX	chrX:576318-587483	5.39736	0.0879062	-5.94015	0.0148982	yes
mrp-5	F14F4.3	WBGene00003411	chrX	chrX:14938442-14946247	16.8955	1.02775	-4.03908	0.0037155	yes
msi-1	R10E9.1	WBGene00003423	chrIII	chrIII:3964636-3976377	4.48397	0.0727555	-5.94557	0.032516	yes
mtx-2	ZC97.1	WBGene00022516	chrIII	chrIII:7761914-7763538	39.1081	241.42	2.626	0.00245142	yes
ncam-1	F02G3.1	WBGene00017184	chrX	chrX:692976-703038	35.2851	0.120843	-8.18978	0.0103693	yes
nekl-1	Y39G10AR.3	WBGene00021461	chrI	chrI:2357884-2372965	1.63126	11.9354	2.87119	0.0290887	yes
nep-1	ZK20.6	WBGene00013926	chrII	chrII:11654147-11657109	12.3511	1.09694	-3.49308	0.0230825	yes
nhr-46	C45E5.6	WBGene00003636	chrIV	chrIV:5747374-5757851	14.5352	0.0657088	-7.78925	0.0261792	yes
nhr-47	C24G6.4	WBGene00003637	chrV	chrV:5505279-5513814	27.9299	1.15729	-4.59298	0.0332696	yes
nid-1	F54F3.1	WBGene00003738	chrV	chrV:12910096-12917174	14.3366	0.0232387	-9.26895	0.00192896	yes
nipi-3	K09A9.1	WBGene00010700	chrX	chrX:15607900-15611743	18.8045	1.1412	-4.04246	0.00100693	yes
nlr-1	F20B10.1	WBGene00003772	chrIV	chrIV:12170811-12178313	7.08336	0.172625	-5.35872	0.036283	yes
nmy-1	F52B10.1	WBGene00003776	chrX	chrX:2909545-2918026	6.66521	0.310479	-4.42408	0.00822812	yes
noah-2	F52B11.3	WBGene00009926	chrIV	chrIV:14091228-14096598	7.18369	0.03017	-7.89546	0.0144772	yes
nrde-3	R04A9.2	WBGene00019862	chrX	chrX:372235-376898	15.1038	0.0618931	-7.93092	0.00433804	yes
obr-3	ZK1086.1	WBGene00014215	chrX	chrX:13798155-13809789	5.57171	0.127979	-5.44414	0.0344836	yes
odc-1	K11C4.4	WBGene00003844	chrV	chrV:6898522-6900205	22.4152	2.85965	-2.97057	0.0391516	yes
ost-1	C44B12.2	WBGene00003893	chrIV	chrIV:1107395-1110860	118.123	13.4564	-3.13393	0.00353612	yes
pab-2	F18H3.3	WBGene00003903	chrX	chrX:13522197-13527345	154.92	4.72057	-5.03642	0.000328374	yes
pcca-1	F27D9.5	WBGene00017864	chrX	chrX:7657486-7660935	55.8214	2.26927	-4.62052	4.27e-05	yes
pccb-1	F52E4.1	WBGene00018701	chrX	chrX:3089485-3094362	172.006	3.38079	-5.66895	2.41e-06	yes
pdk-1	H42K12.1	WBGene00003965	chrX	chrX:1321347-1327980	72.2685	1.16462	-5.95543	5.86e-05	yes
pfd-3	T06G6.9	WBGene00006889	chrI	chrI:12728161-12729854	148.226	543.049	1.87328	0.044845	yes
pha-4	F38A6.1	WBGene00004013	chrV	chrV:20752904-20760282	7.81932	0.0502831	-7.28082	0.0376364	yes
pme-5	ZK1005.1	WBGene00004053	chrV	chrV:1276420-1285700	35.5667	5.97779	-2.57284	0.0250591	yes
pqn-34	F35B3.5	WBGene00004121	chrX	chrX:17021747-17030146	9.17798	0.135548	-6.0813	0.0266302	yes
pqn-44	F55A12.9	WBGene00004131	chrI	chrI:5372857-5384511	89.9774	10.3898	-3.11439	0.00512658	yes
pqn-47	F59B10.1	WBGene00004134	chrII	chrII:10496925-10502481	8.95924	0.645949	-3.79388	0.0204201	yes
pqn-55	R09E10.7	WBGene00004140	chrIV	chrIV:10286932-10292975	11.3743	0.432623	-4.71652	0.000615861	yes
pqn-65	T13H2.4	WBGene00004148	chrX	chrX:4610898-4620396	36.3175	0.762863	-5.5731	1.79e-05	yes
pqn-95	ZK1067.7	WBGene00004174	chrII	chrII:9225123-9227173	11.0551	0.0481855	-7.8419	0.0470812	yes
prx-6	F39G3.7	WBGene00004195	chrV	chrV:4715389-4720095	18.2343	0.166476	-6.7752	0.00520025	yes
ptp-3	C09D8.1	WBGene00004215	chrII	chrII:10968325-11012181	11.5209	0.0526735	-7.77296	0.00221552	yes
puf-9	W06B11.2	WBGene00004245	chrX	chrX:5841556-5845932	9.23871	0.963607	-3.26117	0.0218378	yes
pxn-2	K09C8.5	WBGene00004257	chrX	chrX:10972119-10979199	1.52186	0.0185197	-6.36063	0.0382987	yes
pyr-1	D2085.1	WBGene00004259	chrII	chrII:8651083-8658758	3.09838	0.0725992	-5.41542	0.0194268	yes
pzf-1	T05G11.1	WBGene00011505	chrV	chrV:15926652-15928352	14.8221	0.0329704	-8.81237	0.0284869	yes
rab-14	K09A9.2	WBGene00004276	chrX	chrX:15604697-15606567	7.17464	0.0351884	-7.67167	0.0152991	yes
rad-51	Y43C5A.6	WBGene00004297	chrIV	chrIV:10281663-10284222	30.7301	130.593	2.08736	0.0245542	yes
ram-2	F38A3.2	WBGene00004300	chrII	chrII:11015528-11016783	28.6081	3.53952	-3.0148	0.0417507	yes
rbc-2	Y54F10AM.10	WBGene00004314	chrIII	chrIII:2512637-2528618	4.16287	16.8925	2.02073	0.0480581	yes
rbg-1	F20D1.6	WBGene00004317	chrX	chrX:14983454-14987285	105.359	0.780557	-7.07659	4.85e-06	yes
rgs-10	F45B8.2	WBGene00004353	chrX	chrX:14962851-14963925	127.447	12.4498	-3.35569	0.00440864	yes
rgs-11	F45B8.1	WBGene00004354	chrX	chrX:14964512-14965863	54.172	1.22741	-5.46386	0.00426345	yes
rgs-9	ZC53.7	WBGene00004352	chrX	chrX:1915258-1917071	33.5192	1.49554	-4.48625	0.0281784	yes
rhgf-2	T08H4.1	WBGene00006476	chrII	chrII:4120339-4127852	4.95949	0.0160434	-8.27207	0.0445708	yes
rhr-1	F08F3.3	WBGene00004358	chrV	chrV:5428143-5430415	17.1204	0.062639	-8.09444	0.0023437	yes
rnh-1.2	ZK938.7	WBGene00014163	chrII	chrII:9839709-9841962	9.44487	44.881	2.2485	0.0435584	yes
rpl-30	Y106G6H.3	WBGene00004444	chrI	chrI:10436254-10436867	222.388	846.462	1.92837	0.0395944	yes
rsd-3	C34E11.1	WBGene00004682	chrX	chrX:11798434-11803587	29.699	2.52202	-3.55776	0.00426345	yes
sago-1	K12B6.1	WBGene00019666	chrV	chrV:6303781-6308266	4.92687	0.0154698	-8.31507	0.0423735	yes
sax-1	R11G1.4	WBGene00004727	chrX	chrX:3645865-3650139	31.8356	4.73583	-2.74895	0.0399189	yes
sax-3	ZK377.2	WBGene00004729	chrX	chrX:3451932-3465912	13.7378	0.107844	-6.99306	0.00465262	yes
scpl-3	Y47D9A.2	WBGene00021629	chrI	chrI:4298259-4302238	43.4767	2.65263	-4.03475	0.0140975	yes
scpl-4	T21C9.12	WBGene00011897	chrV	chrV:10599083-10602126	73.663	278.554	1.91895	0.0409142	yes
sdc-2	C35C5.1	WBGene00004746	chrX	chrX:11522646-11533384	4.84952	0.0954168	-5.66745	0.00396401	yes
sdn-1	F57C7.3	WBGene00004749	chrX	chrX:10589717-10593272	18.7457	0.227518	-6.36444	0.0476648	yes
sdz-25	M116.4	WBGene00019791	chrIV	chrIV:8410564-8412154	53.7592	0.807717	-6.05652	0.0106692	yes
sdz-27	R07H5.4	WBGene00011124	chrIV	chrIV:11186990-11188226	88.5856	4.89831	-4.17672	0.00361988	yes
sem-5	C14F5.5	WBGene00004774	chrX	chrX:7959402-7961675	49.9926	0.0182387	-11.4205	2.6e-05	yes
set-19	W01C8.3	WBGene00020919	chrX	chrX:5675210-5680190	7.59288	0.270051	-4.81334	0.0175018	yes
set-28	Y73B3B.2	WBGene00022224	chrX	chrX:214696-215575	6.43456	54.63	3.08578	0.0253361	yes
sex-1	F44A6.2	WBGene00004786	chrX	chrX:10201267-10205361	18.3765	0.603819	-4.9276	0.0148924	yes
shc-2	T27F7.2	WBGene00020867	chrII	chrII:4969195-4988919	26.1423	0.0563196	-8.85853	0.0075828	yes
sma-1	R31.1	WBGene00004855	chrV	chrV:11899544-11916604	12.121	0.336023	-5.17281	1.79e-05	yes
sodh-1	K12G11.3	WBGene00010790	chrV	chrV:11888216-11889615	6.04931	96.2163	3.99144	0.000255001	yes
sor-3	C04E7.2	WBGene00015429	chrX	chrX:353619-357934	7.11267	0.00704293	-9.98	0.0250591	yes
sox-2	K08A8.2	WBGene00004949	chrX	chrX:7458244-7463691	18.7953	0.0317957	-9.20733	0.0152991	yes
spat-3	T13H2.5	WBGene00020496	chrX	chrX:4596049-4605869	43.9887	3.55977	-3.62728	0.0199905	yes
spc-1	K10B3.10	WBGene00004951	chrX	chrX:3117430-3127063	18.9448	0.375885	-5.65536	8.52e-06	yes
spe-6	Y66D12A.20	WBGene00004960	chrIII	chrIII:11505453-11508812	52.1549	198.094	1.92531	0.0332253	yes
F20C5.6	F20C5.6	WBGene00008971	chrIV	chrIV:8771543-8773191	23.1456	0.267746	-6.43373	0.0206968	yes
sqt-3	F23H12.4	WBGene00005018	chrV	chrV:12352974-12354295	158.046	3.28652	-5.58764	4.85e-06	yes
srsx-25	Y62E10A.4	WBGene00013375	chrIV	chrIV:13365144-13368357	3.84307	34.8074	3.17906	0.0230825	yes
stau-1	F55A4.5	WBGene00018857	chrX	chrX:1027669-1035241	24.2944	1.90679	-3.6714	0.00407423	yes
sto-1	F08C6.4	WBGene00006063	chrX	chrX:7562789-7564758	137.877	1.47777	-6.54382	0.00975066	yes
sto-4	Y71H9A.3	WBGene00006066	chrX	chrX:11644075-11647213	74.4544	0.961045	-6.27561	0.0017817	yes
sur-5	K03A1.5	WBGene00006351	chrX	chrX:7301311-7305525	19.9931	0.0139882	-10.4811	0.00769832	yes
swan-1	F53C11.8	WBGene00009977	chrV	chrV:13804381-13807225	14.93	0.323812	-5.52691	0.0171331	yes
swan-2	F53C11.7	WBGene00009976	chrV	chrV:13800977-13804267	18.3283	0.593724	-4.94814	0.00439136	yes
syd-2	F59F5.6	WBGene00006364	chrX	chrX:10549060-10555177	5.56956	0.301256	-4.2085	0.049679	yes
syd-9	ZK867.1	WBGene00044068	chrX	chrX:7218065-7226774	27.2303	0.32773	-6.37656	0.0469197	yes
syg-2	C26G2.1	WBGene00007750	chrX	chrX:14654920-14662772	6.99712	0.0118826	-9.20177	0.00202761	yes
sym-1	C44H4.3	WBGene00006366	chrX	chrX:14581584-14589017	32.4036	0.0445411	-9.5068	0.0469197	yes
sym-4	R03E1.1	WBGene00006369	chrX	chrX:14164582-14169630	21.6699	0.022345	-9.92152	0.000811818	yes
tag-192	E02H4.3	WBGene00006517	chrI	chrI:4685873-4698576	43.1665	0.849726	-5.66677	2.75e-07	yes
tag-196	F41E6.6	WBGene00007055	chrV	chrV:8594889-8597478	25.1321	1.47363	-4.09209	0.00987299	yes
tag-273	Y57G11A.1	WBGene00013289	chrIV	chrIV:14487058-14505139	13.5103	0.0228305	-9.20888	0.00689245	yes
tag-278	C02F12.7	WBGene00015356	chrX	chrX:3684210-3688555	9.92588	0.331727	-4.90313	0.0117321	yes
tag-279	F18E9.5	WBGene00017571	chrX	chrX:8570996-8575390	5.66012	0.021989	-8.0079	0.0391327	yes
tag-294	C54H2.3	WBGene00016937	chrX	chrX:5760260-5763341	27.0137	2.33156	-3.53433	0.0083341	yes
tag-335	C42C1.5	WBGene00016583	chrIV	chrIV:12276063-12278030	6.12973	36.0958	2.55794	0.021723	yes
tag-347	C25G4.4	WBGene00007732	chrIV	chrIV:12452077-12454192	12.1737	51.9937	2.09457	0.0405098	yes
tag-52	C02F12.4	WBGene00006431	chrX	chrX:3674036-3678542	25.4339	0.297566	-6.4174	0.00498724	yes
tbc-12	R11B5.1	WBGene00044061	chrX	chrX:2525205-2532429	12.3849	0.190159	-6.02524	0.0253361	yes
tbx-2	F21H11.3	WBGene00006543	chrIII	chrIII:5130887-5136280	24.7892	1.11544	-4.47403	0.00368929	yes
ten-1	R13F6.4	WBGene00006498	chrIII	chrIII:6830336-6847230	37.3729	0.520232	-6.16669	0.0048327	yes
tir-1	F13B10.1	WBGene00006575	chrIII	chrIII:3869576-3901446	49.3065	2.45383	-4.32867	0.0218723	yes
tlp-1	T23G4.1	WBGene00006580	chrIV	chrIV:13701215-13704003	16.4739	0.913601	-4.17247	0.0206979	yes
toca-1	F09E10.8	WBGene00017298	chrX	chrX:1510512-1521482	8.45134	0.2021	-5.38604	0.0318697	yes
trap-2	T04G9.5	WBGene00020216	chrX	chrX:767030-768069	49.1965	1.46929	-5.06536	0.00769832	yes
try-1	ZK546.15	WBGene00006619	chrII	chrII:4948149-4949480	164.932	7.40954	-4.47635	0.000495344	yes
tth-1	F08F1.8	WBGene00006649	chrX	chrX:8422425-8423680	17.9466	0.246403	-6.18655	0.0424765	yes
ttr-50	F58B3.9	WBGene00010234	chrIV	chrIV:11640121-11640992	87.2329	4.71218	-4.21041	0.0023401	yes
ttr-53	T14G10.3	WBGene00011773	chrIV	chrIV:10158040-10158712	37.1842	315.102	3.08306	0.00200754	yes
uaf-2	Y116A8C.35	WBGene00006698	chrIV	chrIV:17116726-17118724	44.3781	187.42	2.07836	0.0190586	yes
ugt-50	T07C5.1	WBGene00011564	chrX	chrX:12691537-12697928	133.597	1.55039	-6.42911	0.0206408	yes
unc-112	C47E8.7	WBGene00006836	chrV	chrV:14689138-14696918	28.2939	2.36907	-3.5781	0.0277723	yes
unc-115	F09B9.2	WBGene00006839	chrX	chrX:10146832-10153081	36.7012	0.951526	-5.26944	0.000359793	yes
unc-14	K10D3.2	WBGene00006753	chrI	chrI:7122610-7128422	38.9517	5.72243	-2.76699	0.00891052	yes
unc-3	Y16B4A.1	WBGene00006743	chrX	chrX:14773468-14783495	9.69068	0.0225449	-8.74765	0.0284353	yes
unc-39	F56A12.1	WBGene00006775	chrV	chrV:14373373-14375784	22.5837	0	-1.79769e+308	0.0469197	yes
unc-44	B0350.2	WBGene00006780	chrIV	chrIV:5966643-6004021	43.6753	2.44035	-4.16166	0.00836097	yes
unc-5	B0273.4	WBGene00006745	chrIV	chrIV:5495657-5516256	7.58302	0.0382435	-7.63141	0.0277723	yes
unc-51	Y60A3A.1	WBGene00006786	chrV	chrV:19995966-20004456	12.0426	1.01699	-3.56578	0.0144772	yes
unc-68	K11C4.5	WBGene00006801	chrV	chrV:6901669-6929020	3.07622	0.169198	-4.18437	0.00433804	yes
unc-70	K11C4.3	WBGene00006803	chrV	chrV:6881325-6891385	10.1921	0.450305	-4.5004	0.00275459	yes
unc-83	W01A11.3	WBGene00006815	chrV	chrV:6465047-6487863	9.64305	0.792731	-3.60459	0.0104542	yes
unc-84	F54B11.3	WBGene00006816	chrX	chrX:13584704-13589753	29.5555	0.0593858	-8.95909	0.00108351	yes
unc-97	F14D12.2	WBGene00006826	chrX	chrX:5593097-5594930	21.5206	0.064042	-8.39249	0.0035701	yes
ver-3	F59F3.1	WBGene00006896	chrX	chrX:10992443-10997763	9.42895	0.159561	-5.88491	0.0104603	yes
wdfy-2	D2013.2	WBGene00008402	chrII	chrII:9319805-9321819	31.0544	122.756	1.98293	0.0261792	yes
wrt-10	ZK1290.8	WBGene00006956	chrII	chrII:7533251-7534466	22.363	0.102875	-7.76407	0.0388832	yes
wts-1	T20F10.1	WBGene00007047	chrI	chrI:10291884-10297913	11.6824	0.340192	-5.10185	0.0135529	yes
zip-2	K02F3.4	WBGene00019327	chrIII	chrIII:833619-839512	19.3854	2.68181	-2.85369	0.0395944	yes
ztf-11	F52F12.6	WBGene00009939	chrI	chrI:9904294-9910536	5.4159	0.0218763	-7.95169	0.0105575	yes
ztf-12	C01B7.1	WBGene00006342	chrV	chrV:8786528-8795545	13.4557	0.0492174	-8.09483	0.00868678	yes
ztf-19	T27B1.2	WBGene00003933	chrX	chrX:16536761-16540123	11.3783	0.150967	-6.23591	0.0453067	yes

## Sheet: Smartseq_nos_emb-to-L1
test_id	gene_ID	Wormbase ID	locus	locus.1	nos-1/2 EMB PGCs FPKM	nos-1/2 L1 PGCs FPKM	log2.fold_change.	q_value	significant
B0001.5	B0001.5	WBGene00007090	chrIV	chrIV:12141139-12143309	50.9795	110.863	1.12079	0.0388802	yes
B0035.12	B0035.12	WBGene00007111	chrIV	chrIV:11329443-11332922	219.392	101.84	-1.10721	0.019731	yes
B0035.3	B0035.3	WBGene00007106	chrIV	chrIV:11314054-11315028	467.534	126.326	-1.88792	6.11e-05	yes
B0205.13	B0205.13	WBGene00044644	chrI	chrI:10727739-10728784	20.361	118.348	2.53915	0.0181065	yes
B0228.7	B0228.7	WBGene00015064	chrII	chrII:7757137-7758387	42.4057	138.465	1.70719	0.00298156	yes
B0261.7	B0261.7	WBGene00015095	chrI	chrI:5269555-5270937	165.899	65.5315	-1.34004	0.0161414	yes
B0281.5	B0281.5	WBGene00015112	chrII	chrII:2299946-2300887	73.5058	5.39479	-3.76822	0.027701	yes
B0284.1	B0284.1	WBGene00007131	chrIII	chrIII:4376956-4379172	0.241557	63.1264	8.02974	0.000673867	yes
B0284.2	B0284.2	WBGene00007132	chrIII	chrIII:4381955-4384113	1.91054	88.014	5.52568	8.07e-07	yes
B0303.4	B0303.4	WBGene00015126	chrIII	chrIII:8689768-8693393	82.0702	26.0855	-1.65361	0.00166778	yes
B0365.1	B0365.1	WBGene00007150	chrV	chrV:13116487-13120120	32.5612	79.115	1.28079	0.00893726	yes
B0393.3	B0393.3	WBGene00007168	chrIII	chrIII:4757212-4759686	834.206	264.465	-1.65733	0.000112444	yes
B0412.3	B0412.3	WBGene00015173	chrIII	chrIII:795130-809434	17.5952	50.8164	1.53011	0.00310837	yes
B0416.5	B0416.5	WBGene00015181	chrX	chrX:9268574-9270794	95.6112	214.409	1.16511	0.0312861	yes
B0491.1	B0491.1	WBGene00007189	chrII	chrII:11348365-11349882	79.2263	29.1055	-1.44469	0.0236609	yes
B0495.5	B0495.5	WBGene00015204	chrII	chrII:7695892-7698454	26.5576	61.9976	1.22309	0.0336736	yes
B0495.9	B0495.9	WBGene00015208	chrII	chrII:7707528-7708660	769.525	376.155	-1.03264	0.0348303	yes
B0507.10	B0507.10	WBGene00015227	chrV	chrV:8758797-8760469	0.257413	50.3463	7.61166	0.0055675	yes
B0507.6	B0507.6	WBGene00015223	chrV	chrV:8746135-8753044	0.419572	32.1804	6.26112	0.000203571	yes
B0507.8	B0507.8	WBGene00015225	chrV	chrV:8760664-8762730	0.0341258	22.4041	9.35868	0.0433155	yes
B0507.9	B0507.9	WBGene00015226	chrV	chrV:8764930-8766016	0	49.4683	1.79769e+308	0.00723624	yes
B0511.11	B0511.11	WBGene00015236	chrI	chrI:10648594-10650163	26.5617	76.6623	1.52917	0.0257576	yes
C01A2.5	C01A2.5	WBGene00007217	chrI	chrI:13384740-13387073	1353.03	678.03	-0.996773	0.0405467	yes
C01B12.2	C01B12.2	WBGene00015285	chrII	chrII:19537-22158	4.84118	26.041	2.42735	0.0127908	yes
C01F6.1	C01F6.1	WBGene00007221	chrIV	chrIV:9096826-9101570	63.5026	17.7533	-1.83873	0.00104489	yes
C01G6.3	C01G6.3	WBGene00007225	chrII	chrII:9269833-9271207	121.735	24.933	-2.28761	6.22e-05	yes
C01G8.1	C01G8.1	WBGene00015312	chrI	chrI:5272849-5274325	495.766	39.1643	-3.66205	3.68e-10	yes
C02F5.12	C02F5.12	WBGene00015352	chrIII	chrIII:8240846-8242932	36.9732	9.10455	-2.02182	0.0191209	yes
C03A3.2	C03A3.2	WBGene00007267	chrX	chrX:11262780-11266247	45.8824	9.05385	-2.34134	0.00031741	yes
C03H5.2	C03H5.2	WBGene00015404	chrII	chrII:388832-392728	89.7445	191.209	1.09126	0.0434122	yes
C04B4.2	C04B4.2	WBGene00007290	chrX	chrX:12283252-12285211	9.07102	1.05123	-3.10919	0.0292561	yes
C04F12.1	C04F12.1	WBGene00007297	chrI	chrI:9673658-9678544	57.3568	21.7084	-1.40171	0.00998613	yes
C05C10.5	C05C10.5	WBGene00007332	chrII	chrII:9939094-9940278	179.244	41.636	-2.10602	0.00173312	yes
C05D11.1	C05D11.1	WBGene00015481	chrIII	chrIII:6436555-6439904	111.592	240.12	1.10552	0.019731	yes
C06A5.1	C06A5.1	WBGene00015499	chrI	chrI:6012059-6021985	11.8939	3.93288	-1.59657	0.0211473	yes
C06A8.2	C06A8.2	WBGene00015513	chrII	chrII:7779299-7781202	1011.73	368.166	-1.4584	0.000567707	yes
C06A8.3	C06A8.3	WBGene00015514	chrII	chrII:7785129-7794267	127.235	7.40751	-4.10236	1.41e-06	yes
C06E4.8	C06E4.8	WBGene00015537	chrIV	chrIV:7284207-7285509	0.398707	42.1662	6.72461	0.0297293	yes
C06G3.9	C06G3.9	WBGene00015555	chrIV	chrIV:7032704-7036850	45.8453	113.922	1.3132	0.00817241	yes
C06H2.7	C06H2.7	WBGene00007391	chrV	chrV:11141479-11144403	37.2165	3.57541	-3.37976	0.00353909	yes
C08F1.10	C08F1.10	WBGene00015613	chrII	chrII:1785275-1786283	98.3545	5.74741	-4.09701	2.29e-05	yes
C08F1.6	C08F1.6	WBGene00015610	chrII	chrII:1787227-1788193	20.8799	2.51994	-3.05066	0.0317661	yes
C08H9.16	C08H9.16	WBGene00086566	chrII	chrII:9892729-9894279	53.1715	127.787	1.26501	0.0465847	yes
C09D4.4	C09D4.4	WBGene00015635	chrI	chrI:5479553-5484646	82.379	206.787	1.32779	0.00476458	yes
C09E7.8	C09E7.8	WBGene00015642	chrIII	chrIII:6553521-6558522	25.6695	72.2241	1.49243	0.0202286	yes
C10E2.6	C10E2.6	WBGene00015676	chrX	chrX:16767106-16770427	11.6612	51.8554	2.15278	8.54e-05	yes
C13G3.1	C13G3.1	WBGene00007553	chrV	chrV:11011572-11012444	3.52459	287.47	6.34981	3.94e-09	yes
C14B1.5	C14B1.5	WBGene00007576	chrIII	chrIII:3706868-3709181	46.0167	119.074	1.37163	0.0140552	yes
C14F11.6	C14F11.6	WBGene00015781	chrX	chrX:6238090-6239051	27.8754	2.08427	-3.74138	0.0182505	yes
C16A3.6	C16A3.6	WBGene00015811	chrIII	chrIII:6379395-6380603	272.537	633.753	1.21747	0.00843709	yes
C16H3.3	C16H3.3	WBGene00015868	chrX	chrX:17601553-17609972	7.85519	1.18181	-2.73265	0.033123	yes
C17H11.2	C17H11.2	WBGene00015922	chrX	chrX:8169879-8172818	44.663	11.551	-1.95106	0.000927381	yes
C18A3.4	C18A3.4	WBGene00015942	chrII	chrII:5707671-5712316	46.7712	4.49372	-3.37964	0.00125641	yes
C18D11.3	C18D11.3	WBGene00007681	chrIII	chrIII:11823347-11824340	187.919	43.3236	-2.11688	0.000332439	yes
C18E3.3	C18E3.3	WBGene00015972	chrI	chrI:4203459-4208521	9.97596	0.866549	-3.5251	0.00706658	yes
C18E3.9	C18E3.9	WBGene00015976	chrI	chrI:4214297-4215754	594.38	219.117	-1.43968	0.00320386	yes
C18E9.2	C18E9.2	WBGene00007683	chrII	chrII:8964990-8966857	1307.61	414.8	-1.65645	0.00218297	yes
C18H2.2	C18H2.2	WBGene00015989	chrIII	chrIII:7678954-7680792	22.4728	62.3647	1.47255	0.0207019	yes
C23H3.3	C23H3.3	WBGene00016019	chrII	chrII:57669-60040	52.8788	143.527	1.44056	0.0104162	yes
C24D10.5	C24D10.5	WBGene00016056	chrIV	chrIV:5150250-5151024	92.9637	16.9473	-2.45561	0.0029093	yes
C24H12.1	C24H12.1	WBGene00016071	chrII	chrII:441497-446928	16.2067	0.690534	-4.55273	0.00166778	yes
C25A1.12	C25A1.12	WBGene00007711	chrI	chrI:10191298-10192884	83.3387	20.303	-2.03729	0.000976912	yes
C26E6.3	C26E6.3	WBGene00016139	chrIII	chrIII:4944475-4947269	28.8078	10.1754	-1.50138	0.0448407	yes
C27D9.1	C27D9.1	WBGene00016163	chrII	chrII:4753451-4756780	34.134	8.7308	-1.96702	0.00877537	yes
C27F2.10	C27F2.10	WBGene00016171	chrIII	chrIII:4984986-4986896	106.477	38.6925	-1.46042	0.0109702	yes
C27F2.9	C27F2.9	WBGene00043156	chrIII	chrIII:4960386-4963055	500.03	206.443	-1.27627	0.026503	yes
C27H6.8	C27H6.8	WBGene00007787	chrV	chrV:9986396-9987766	145.457	311.595	1.09908	0.0287171	yes
C28H8.3	C28H8.3	WBGene00016194	chrIII	chrIII:5908652-5914687	70.4694	227.845	1.69299	6.53e-05	yes
C29A12.1	C29A12.1	WBGene00007797	chrV	chrV:10812387-10813374	58.5246	12.3588	-2.24351	0.0126477	yes
C29H12.5	C29H12.5	WBGene00016236	chrII	chrII:6110564-6113357	24.6705	67.4343	1.4507	0.00818071	yes
C30F12.5	C30F12.5	WBGene00016264	chrI	chrI:6992226-6999570	4.99927	46.7431	3.22496	0.000599212	yes
C30G4.7	C30G4.7	WBGene00016272	chrX	chrX:17056867-17058462	2.35869	142.866	5.92054	1.79e-05	yes
C32E8.11	C32E8.11	WBGene00016326	chrI	chrI:3807475-3816799	47.1593	104.336	1.14563	0.0142937	yes
C33F10.4	C33F10.4	WBGene00016353	chrII	chrII:4795755-4797209	38.02	10.7429	-1.82338	0.0420373	yes
C33H5.17	C33H5.17	WBGene00016383	chrIV	chrIV:7811208-7815721	21.3104	74.1459	1.79881	0.0297293	yes
C33H5.7	C33H5.7	WBGene00016374	chrIV	chrIV:7774435-7775938	657.051	225.705	-1.54156	0.000324301	yes
C34B2.10	C34B2.10	WBGene00016395	chrI	chrI:10682459-10683139	242.823	20.1246	-3.59287	1.34e-06	yes
C34C12.8	C34C12.8	WBGene00007927	chrIII	chrIII:3460393-3461578	80.8378	27.5723	-1.55181	0.0362345	yes
C34D4.14	C34D4.14	WBGene00016405	chrIV	chrIV:7134334-7144552	62.2439	147.306	1.24281	0.00698091	yes
C34E7.4	C34E7.4	WBGene00007934	chrX	chrX:12932168-12934907	43.7112	3.78159	-3.53094	0.000935952	yes
C34F6.9	C34F6.9	WBGene00007943	chrX	chrX:11215630-11222582	9.82068	34.9659	1.83205	0.00529711	yes
C35E7.5	C35E7.5	WBGene00016457	chrI	chrI:10823346-10828443	19.037	4.67015	-2.02726	0.00359302	yes
C36B1.11	C36B1.11	WBGene00007978	chrI	chrI:8755906-8757564	308.771	47.9749	-2.68618	3.38e-08	yes
C36E6.1	C36E6.1	WBGene00016489	chrX	chrX:17434371-17438007	94.1438	357.139	1.92355	0.000188125	yes
C36E8.1	C36E8.1	WBGene00007980	chrIII	chrIII:3999277-4004123	165.48	333.487	1.01097	0.0389632	yes
C37H5.6	C37H5.6	WBGene00016509	chrV	chrV:4818751-4823330	153.991	546.513	1.82741	1.81e-05	yes
C38D4.4	C38D4.4	WBGene00008005	chrIII	chrIII:4793050-4795363	31.9897	73.9236	1.20843	0.0403359	yes
C39E9.11	C39E9.11	WBGene00008034	chrIV	chrIV:13091163-13093820	1026.38	312.532	-1.71548	2.88e-05	yes
C40A11.6	C40A11.6	WBGene00016549	chrII	chrII:2144362-2145587	17.5706	0.463403	-5.24476	0.0154964	yes
C44H9.4	C44H9.4	WBGene00008099	chrV	chrV:12835690-12839766	0.19357	5.56785	4.84619	0.0407877	yes
C45B2.6	C45B2.6	WBGene00016661	chrX	chrX:6053064-6057307	18.4933	43.5543	1.23581	0.0410441	yes
C45G9.2	C45G9.2	WBGene00016674	chrIII	chrIII:5069030-5070380	219.031	56.3534	-1.95856	0.000151918	yes
C46H3.2	C46H3.2	WBGene00016725	chrX	chrX:1211764-1220024	18.7417	3.73712	-2.32626	0.0397947	yes
C47F8.1	C47F8.1	WBGene00008157	chrI	chrI:12335049-12336587	39.648	2.04278	-4.27864	0.000526541	yes
C47G2.4	C47G2.4	WBGene00008165	chrII	chrII:11290790-11293508	1085.74	397.535	-1.44952	0.000878066	yes
C48B4.11	C48B4.11	WBGene00008174	chrIII	chrIII:9564642-9565959	306.043	86.6201	-1.82096	0.000210936	yes
C49C3.8	C49C3.8	WBGene00008198	chrIV	chrIV:17335232-17336644	74.3289	25.0454	-1.56938	0.0314734	yes
C49F5.6	C49F5.6	WBGene00008210	chrX	chrX:11988245-11991199	10.1936	103.824	3.34841	9.72e-12	yes
C49G7.10	C49G7.10	WBGene00016788	chrV	chrV:4040393-4041989	12.4027	47.2219	1.9288	0.0362345	yes
C49G7.12	C49G7.12	WBGene00077593	chrV	chrV:4038805-4039919	1.52431	20.1655	3.72566	0.037185	yes
C49G7.5	C49G7.5	WBGene00016783	chrV	chrV:4042388-4043580	1.90847	26.0111	3.76864	0.0226314	yes
C50C3.1	C50C3.1	WBGene00016799	chrIII	chrIII:8191747-8193776	67.5885	23.7526	-1.50869	0.0217748	yes
C50D2.7	C50D2.7	WBGene00016810	chrII	chrII:92180-95280	19.5633	4.90344	-1.99628	0.0304528	yes
C52A10.3	C52A10.3	WBGene00016864	chrV	chrV:5237596-5239424	18.9853	1.77477	-3.41917	0.0124458	yes
C52B9.4	C52B9.4	WBGene00016867	chrX	chrX:4260627-4264528	10.7885	30.0334	1.47707	0.0444835	yes
C53A5.13	C53A5.13	WBGene00008270	chrV	chrV:14546905-14554525	0.983158	13.2201	3.74917	0.00892822	yes
C53A5.9	C53A5.9	WBGene00008267	chrV	chrV:14557022-14558903	0	18.9352	1.79769e+308	0.0130472	yes
C53D6.6	C53D6.6	WBGene00008283	chrIV	chrIV:9027675-9032636	23.6446	82.0166	1.79441	0.000992319	yes
C54D10.8	C54D10.8	WBGene00008302	chrV	chrV:12445164-12446647	2.74514	133.762	5.60664	8.07e-07	yes
C55C3.6	C55C3.6	WBGene00016956	chrIV	chrIV:5683203-5684661	12.0293	81.0061	2.75148	0.000976912	yes
C56A3.6	C56A3.6	WBGene00008345	chrV	chrV:13553366-13556396	34.2148	92.3451	1.43242	0.0107562	yes
C56C10.11	C56C10.11	WBGene00016967	chrII	chrII:6598316-6601087	37.2661	104.234	1.4839	0.00230663	yes
D1037.1	D1037.1	WBGene00017025	chrI	chrI:3684804-3690146	40.6108	93.2211	1.19879	0.0228216	yes
D1044.6	D1044.6	WBGene00017031	chrIII	chrIII:5535625-5543128	174.843	85.7072	-1.02857	0.0348875	yes
D1046.2	D1046.2	WBGene00008363	chrIV	chrIV:8924161-8926099	139.553	35.9975	-1.95484	0.000112444	yes
D2013.3	D2013.3	WBGene00008403	chrII	chrII:9317564-9319448	58.2123	6.11847	-3.25008	0.000111639	yes
D2030.7	D2030.7	WBGene00008417	chrI	chrI:7588648-7590563	854.161	359.624	-1.24802	0.00583257	yes
D2045.5	D2045.5	WBGene00008423	chrIII	chrIII:10468009-10469406	2.82643	20.1641	2.83473	0.0492228	yes
D2085.6	D2085.6	WBGene00008431	chrII	chrII:8659731-8661662	258.787	101.262	-1.35368	0.00470561	yes
D2096.11	D2096.11	WBGene00017078	chrIV	chrIV:8389133-8392850	23.665	63.849	1.43191	0.00975466	yes
D2096.5	D2096.5	WBGene00017072	chrIV	chrIV:8359151-8359703	14.1774	92.7811	2.71023	0.044252	yes
E01A2.4	E01A2.4	WBGene00002696	chrI	chrI:4129568-4132294	708.407	250.455	-1.50003	0.000429891	yes
E02H9.3	E02H9.3	WBGene00017101	chrIII	chrIII:2461900-2465048	14.4787	55.4764	1.93795	0.00377264	yes
EEED8.3	EEED8.3	WBGene00017134	chrII	chrII:5414271-5415350	464.42	115.624	-2.00599	1.6e-05	yes
F01F1.12	F01F1.12	WBGene00017166	chrIII	chrIII:5873009-5876425	1427.11	224.787	-2.66647	6.11e-10	yes
F01G4.6	F01G4.6	WBGene00008505	chrIV	chrIV:11147298-11154313	237.48	532.784	1.16575	0.0380752	yes
F02E9.7	F02E9.7	WBGene00008531	chrI	chrI:8413253-8416123	41.9944	8.61237	-2.28572	0.00373739	yes
F07F6.4	F07F6.4	WBGene00017217	chrII	chrII:5427431-5429557	19.1274	4.36816	-2.13054	0.032242	yes
F08B12.1	F08B12.1	WBGene00008571	chrX	chrX:11385050-11392715	8.12679	1.40021	-2.53704	0.0236452	yes
F08F3.6	F08F3.6	WBGene00017263	chrV	chrV:5418030-5420023	43.0049	1.66105	-4.69433	7.99e-05	yes
F08G12.2	F08G12.2	WBGene00008586	chrX	chrX:11298016-11299623	464.498	210.753	-1.14012	0.0218101	yes
F09E5.7	F09E5.7	WBGene00017285	chrII	chrII:5352067-5353659	131.79	58.3841	-1.1746	0.0388802	yes
F09F7.7	F09F7.7	WBGene00017304	chrIII	chrIII:5553471-5554894	30.9823	120.709	1.96201	0.00619062	yes
F09G2.2	F09G2.2	WBGene00017311	chrV	chrV:7196896-7198416	108.401	247.256	1.18963	0.022473	yes
F10C5.2	F10C5.2	WBGene00017328	chrIII	chrIII:472299-475348	124.498	53.3805	-1.22173	0.0197677	yes
F10D11.2	F10D11.2	WBGene00008648	chrI	chrI:8435955-8438632	548.47	119.197	-2.20206	8.79e-08	yes
F10E9.5	F10E9.5	WBGene00017357	chrIII	chrIII:8307520-8308366	497.108	197.662	-1.33053	0.00908104	yes
F11A10.5	F11A10.5	WBGene00008686	chrIV	chrIV:12094349-12096663	74.1432	27.7165	-1.41957	0.0144197	yes
F11A3.2	F11A3.2	WBGene00008670	chrV	chrV:9513829-9518851	44.8329	7.94203	-2.49698	0.000424296	yes
F11D5.1	F11D5.1	WBGene00017380	chrX	chrX:3333116-3347239	4.2575	57.0156	3.74328	0.00508229	yes
F13B12.1	F13B12.1	WBGene00008729	chrIV	chrIV:10422594-10424617	66.863	160.471	1.26303	0.0132824	yes
F13B9.1	F13B9.1	WBGene00017419	chrX	chrX:8287208-8294448	15.9614	67.0764	2.07122	0.000136551	yes
F13E9.11	F13E9.11	WBGene00008760	chrIV	chrIV:10864309-10873608	74.8886	13.7479	-2.44554	0.0258413	yes
F13G3.6	F13G3.6	WBGene00008766	chrI	chrI:7303342-7304685	34.8697	96.8442	1.47369	0.0197677	yes
F13G3.7	F13G3.7	WBGene00008767	chrI	chrI:7304915-7307004	126.386	40.7856	-1.63171	0.00213596	yes
F14D7.6	F14D7.6	WBGene00008793	chrV	chrV:14301405-14306410	9.27848	31.337	1.75591	0.0323128	yes
F15B10.1	F15B10.1	WBGene00017480	chrIV	chrIV:6603991-6606177	56.4579	15.4101	-1.8733	0.0360531	yes
F15D3.7	F15D3.7	WBGene00008857	chrI	chrI:11578631-11579585	99.4014	229.927	1.20984	0.0323576	yes
F16B12.6	F16B12.6	WBGene00008882	chrX	chrX:14102289-14107836	19.6984	42.3188	1.10322	0.0434122	yes
F17C11.11	F17C11.11	WBGene00008922	chrV	chrV:10937613-10938821	6.23432	32.9061	2.40005	0.0345254	yes
F17H10.1	F17H10.1	WBGene00008925	chrX	chrX:13105122-13108462	19.3877	0.173389	-6.80499	9.17e-05	yes
F18A12.7	F18A12.7	WBGene00017556	chrII	chrII:3411427-3414472	0.844867	11.3975	3.75385	0.0156024	yes
F19B10.10	F19B10.10	WBGene00017589	chrII	chrII:3677537-3681418	15.9177	2.73401	-2.54154	0.00752181	yes
F19B10.4	F19B10.4	WBGene00017586	chrII	chrII:3660086-3662621	24.2884	5.46375	-2.1523	0.0277493	yes
F19H6.4	F19H6.4	WBGene00008959	chrX	chrX:12365619-12367047	22.1784	1.39508	-3.99073	0.0140263	yes
F20D12.2	F20D12.2	WBGene00017642	chrIV	chrIV:7948661-7955886	56.2986	124.19	1.14138	0.0228849	yes
F21A3.5	F21A3.5	WBGene00008995	chrV	chrV:15538238-15542896	16.0141	54.9051	1.77759	0.00604268	yes
F21C10.7	F21C10.7	WBGene00017657	chrV	chrV:9112767-9122096	3.55164	0.394441	-3.1706	0.0144197	yes
F21D5.1	F21D5.1	WBGene00009006	chrIV	chrIV:8725707-8728044	97.7195	15.8712	-2.62224	9.99e-07	yes
F21D5.2	F21D5.2	WBGene00009007	chrIV	chrIV:8728125-8730497	208.136	54.2031	-1.94108	7.33e-05	yes
F21F3.2	F21F3.2	WBGene00017672	chrI	chrI:4903437-4905139	1.02533	31.1257	4.92395	0.00455999	yes
F21F3.3	F21F3.3	WBGene00017673	chrI	chrI:4901974-4903137	111.265	6060.71	5.76742	0	yes
F22B8.7	F22B8.7	WBGene00009049	chrV	chrV:16095203-16097294	6.05702	27.4166	2.17837	0.0482251	yes
F22D6.2	F22D6.2	WBGene00009050	chrI	chrI:7079611-7081521	224.332	96.5067	-1.21694	0.0204132	yes
F22D6.9	F22D6.9	WBGene00009054	chrI	chrI:7099829-7101760	175.447	377.033	1.10366	0.0238789	yes
F22E5.17	F22E5.17	WBGene00017712	chrII	chrII:2678069-2679167	97.7584	2.02048	-5.59645	5.43e-07	yes
F22G12.4	F22G12.4	WBGene00009064	chrI	chrI:13155260-13159316	19.3863	51.8274	1.41867	0.010371	yes
F22G12.5	F22G12.5	WBGene00009065	chrI	chrI:13162487-13182648	14.5661	39.8379	1.45153	0.00187583	yes
F23A7.8	F23A7.8	WBGene00044638	chrX	chrX:16213300-16213516	10500	4680.86	-1.16554	0.019731	yes
F23B2.10	F23B2.10	WBGene00009077	chrIV	chrIV:9152804-9154306	0.4073	105.138	8.01197	0.00102279	yes
F23B2.7	F23B2.7	WBGene00009075	chrIV	chrIV:9150476-9152029	12.0675	82.6682	2.7762	0.00317234	yes
F23D12.10	F23D12.10	WBGene00045291	chrX	chrX:14413640-14415586	0.239104	12.354	5.6912	0.0231953	yes
F25B4.2	F25B4.2	WBGene00017766	chrV	chrV:5709401-5712311	20.7138	4.09074	-2.34016	0.0111078	yes
F25B4.6	F25B4.6	WBGene00017769	chrV	chrV:5682703-5684573	41.66	114.893	1.46356	0.00552341	yes
F25B5.3	F25B5.3	WBGene00017775	chrIII	chrIII:5948842-5953486	125.602	33.2221	-1.91864	0.00145537	yes
F25G6.9	F25G6.9	WBGene00017800	chrV	chrV:8565274-8569954	34.3586	78.3015	1.18837	0.0167444	yes
F26B1.2	F26B1.2	WBGene00017816	chrI	chrI:6317702-6323993	99.8373	19.1712	-2.38064	0.00565223	yes
F26E4.3	F26E4.3	WBGene00009158	chrI	chrI:9762395-9767860	1.56284	22.0802	3.82052	0.00352714	yes
F26E4.4	F26E4.4	WBGene00009159	chrI	chrI:9768935-9772556	89.9108	39.4993	-1.18667	0.0479717	yes
F26F2.7	F26F2.7	WBGene00009172	chrV	chrV:20580964-20590290	23.3145	5.30083	-2.13694	0.0055675	yes
F26G5.1	F26G5.1	WBGene00017843	chrV	chrV:4975470-4977485	24.7667	1.65645	-3.90223	0.00173805	yes
F28H7.8	F28H7.8	WBGene00009241	chrV	chrV:10758939-10760549	2.71835	33.752	3.63417	0.00190124	yes
F29G9.7	F29G9.7	WBGene00017933	chrV	chrV:6035379-6036544	3.53843	78.6602	4.47445	0.000160092	yes
F30A10.9	F30A10.9	WBGene00009266	chrI	chrI:9501259-9505760	83.185	221.557	1.41328	0.027701	yes
F30F8.1	F30F8.1	WBGene00009270	chrI	chrI:7832708-7835399	391.879	131.505	-1.57529	0.000445129	yes
F30F8.3	F30F8.3	WBGene00009272	chrI	chrI:7835808-7836940	68.4701	20.1393	-1.76546	0.0181529	yes
F30H5.3	F30H5.3	WBGene00017937	chrIII	chrIII:505234-512173	4.77777	0.00803816	-9.21526	0.00352196	yes
F31C3.3	F31C3.3	WBGene00009285	chrI	chrI:15041435-15050668	31.4864	85.1262	1.43488	0.001164	yes
F32A7.4	F32A7.4	WBGene00009305	chrI	chrI:14839893-14843092	242.672	111.657	-1.11994	0.0246996	yes
F32E10.5	F32E10.5	WBGene00017992	chrIV	chrIV:7574343-7578370	51.7796	115.856	1.16188	0.0442494	yes
F33H1.4	F33H1.4	WBGene00009365	chrII	chrII:10174588-10180066	58.9914	26.0112	-1.18137	0.0228849	yes
F33H2.2	F33H2.2	WBGene00009366	chrI	chrI:15023128-15030539	167.328	66.1121	-1.33969	0.0081932	yes
F33H2.5	F33H2.5	WBGene00009368	chrI	chrI:15005607-15013863	38.0279	77.3392	1.02414	0.0380752	yes
F35C11.5	F35C11.5	WBGene00009404	chrII	chrII:8253216-8255218	58.728	12.2887	-2.25671	0.000415603	yes
F35D11.3	F35D11.3	WBGene00018044	chrII	chrII:4608366-4612048	0.977793	9.74143	3.31653	0.0345557	yes
F35G12.5	F35G12.5	WBGene00009442	chrIII	chrIII:4584899-4586442	28.2007	80.7084	1.51699	0.0244363	yes
F36A2.2	F36A2.2	WBGene00009452	chrI	chrI:8801741-8804690	64.7528	161.272	1.31648	0.00871249	yes
F36H2.2	F36H2.2	WBGene00009499	chrI	chrI:9246020-9249376	278.028	127.969	-1.11944	0.0229054	yes
F36H5.8	F36H5.8	WBGene00018106	chrII	chrII:1748383-1751603	5.8302	0.187234	-4.96063	0.0417033	yes
F38A1.8	F38A1.8	WBGene00009521	chrIV	chrIV:1232900-1239823	17.0525	2.21033	-2.94765	0.00134308	yes
F39B2.1	F39B2.1	WBGene00009553	chrI	chrI:14791043-14794044	33.2027	10.5583	-1.65292	0.0305238	yes
F39C12.1	F39C12.1	WBGene00018193	chrX	chrX:4834865-4853035	6.36262	23.6406	1.89358	2.16e-05	yes
F41G3.6	F41G3.6	WBGene00018302	chrII	chrII:6742873-6744165	76.0277	23.3498	-1.70312	0.0174682	yes
F41H10.4	F41H10.4	WBGene00018317	chrIV	chrIV:5364543-5366746	30.7231	92.0638	1.58331	0.00257155	yes
F42C5.3	F42C5.3	WBGene00018345	chrIV	chrIV:7286170-7287356	4.96243	67.8202	3.7726	0.0015727	yes
F42C5.9	F42C5.9	WBGene00018349	chrIV	chrIV:7314362-7317152	3.05066	21.0143	2.78418	0.0029093	yes
F42F12.3	F42F12.3	WBGene00009635	chrX	chrX:12350519-12351524	3.11602	34.2681	3.45909	0.0223065	yes
F43D2.1	F43D2.1	WBGene00009650	chrV	chrV:14612541-14613574	292.55	65.6401	-2.15604	5.26e-05	yes
F43G9.3	F43G9.3	WBGene00009666	chrI	chrI:8612722-8615125	31.0058	8.61574	-1.84749	0.029152	yes
F44D12.1	F44D12.1	WBGene00009678	chrIV	chrIV:10009944-10016377	4.51666	22.6054	2.32334	0.0010258	yes
F44E2.8	F44E2.8	WBGene00018421	chrIII	chrIII:8848551-8849788	347.759	107.89	-1.68853	0.000526541	yes
F44F1.6	F44F1.6	WBGene00009698	chrI	chrI:13260925-13262716	7.13429	0.490656	-3.86199	0.0350138	yes
F45G2.4	F45G2.4	WBGene00009732	chrIII	chrIII:13426160-13427598	990.08	495.123	-0.999757	0.0393825	yes
F46A9.1	F46A9.1	WBGene00009754	chrI	chrI:9457808-9458840	0.277644	24.4885	6.46273	0.0471294	yes
F46F11.1	F46F11.1	WBGene00018508	chrI	chrI:5627821-5637620	34.2206	81.0815	1.24451	0.0499865	yes
F46H5.3	F46H5.3	WBGene00018519	chrX	chrX:7230685-7238618	391.722	1745.11	2.15542	0.000654825	yes
F47B8.2	F47B8.2	WBGene00009803	chrV	chrV:14316003-14316609	1.63063	59.3968	5.18688	0.00604268	yes
F47B8.3	F47B8.3	WBGene00009804	chrV	chrV:14321463-14322861	14.7301	109.42	2.89304	9.69e-05	yes
F47D12.9	F47D12.9	WBGene00018564	chrIII	chrIII:6299290-6303167	57.1599	180.878	1.66194	0.000304979	yes
F47G6.2	F47G6.2	WBGene00018579	chrI	chrI:1471298-1479922	0.991063	14.8682	3.90711	0.019731	yes
F47H4.1	F47H4.1	WBGene00009834	chrV	chrV:17347896-17350151	102.347	5.77731	-4.14692	5.72e-07	yes
F48E3.6	F48E3.6	WBGene00018606	chrX	chrX:7501190-7502587	30.7471	2.93609	-3.38848	0.0016875	yes
F48E8.3	F48E8.3	WBGene00018610	chrIII	chrIII:5461339-5464341	64.1161	162.882	1.34507	0.00542317	yes
F49E12.6	F49E12.6	WBGene00009899	chrII	chrII:8412619-8416799	18.5785	4.12294	-2.17189	0.01602	yes
F49E2.5	F49E2.5	WBGene00009888	chrX	chrX:9543612-9560740	2.23603	21.5239	3.26692	0.00679594	yes
F49E8.2	F49E8.2	WBGene00018636	chrIV	chrIV:7543974-7551498	1487.69	412.728	-1.84981	0.00199093	yes
F52F12.7	F52F12.7	WBGene00009940	chrI	chrI:9928969-9930876	180.671	55.5178	-1.70234	0.00258587	yes
F52G3.1	F52G3.1	WBGene00018710	chrX	chrX:16963795-16972739	18.8972	63.027	1.7378	0.000249798	yes
F53B1.2	F53B1.2	WBGene00018735	chrX	chrX:2108975-2111714	20.0786	1.88129	-3.41587	0.000454128	yes
F53B3.5	F53B3.5	WBGene00018743	chrX	chrX:2872799-2879611	22.9105	2.9267	-2.96866	0.0055675	yes
F53H4.4	F53H4.4	WBGene00010009	chrX	chrX:15866341-15868628	27.9297	6.78027	-2.04238	0.0416066	yes
F54B3.1	F54B3.1	WBGene00010013	chrII	chrII:10251592-10268108	24.5708	56.4554	1.20017	0.0115032	yes
F54D10.5	F54D10.5	WBGene00018806	chrII	chrII:3807097-3808225	71.5299	25.0994	-1.5109	0.0421228	yes
F55A11.1	F55A11.1	WBGene00010075	chrV	chrV:11763217-11764360	221.244	86.1745	-1.36031	0.0161322	yes
F55A11.7	F55A11.7	WBGene00010080	chrV	chrV:11784569-11787424	66.4835	16.5933	-2.00239	0.00157125	yes
F55B12.10	F55B12.10	WBGene00077439	chrV	chrV:13839754-13840267	5.98187	271.797	5.50579	0.0126721	yes
F55D12.2	F55D12.2	WBGene00010111	chrI	chrI:7889350-7894850	2.18544	11.6248	2.41121	0.0283454	yes
F55F8.9	F55F8.9	WBGene00018897	chrI	chrI:5669970-5673355	22.5584	5.50824	-2.034	0.01431	yes
F56A11.5	F56A11.5	WBGene00018925	chrIV	chrIV:568372-570843	14.577	0.582458	-4.6454	0.00687458	yes
F56C9.3	F56C9.3	WBGene00018948	chrIII	chrIII:7311232-7313045	117.616	41.6326	-1.4983	0.0054689	yes
F56C9.6	F56C9.6	WBGene00018950	chrIII	chrIII:7308933-7310709	40.8369	116.478	1.51211	0.0197677	yes
F56D2.3	F56D2.3	WBGene00018965	chrIII	chrIII:5584645-5587008	9.89435	1.0921	-3.1795	0.027701	yes
F56D2.5	F56D2.5	WBGene00018966	chrIII	chrIII:5578395-5581179	6.48803	48.6951	2.90792	9.31e-05	yes
F56D2.6	F56D2.6	WBGene00018967	chrIII	chrIII:5587221-5591678	238.016	93.7834	-1.34366	0.0126721	yes
F56F10.4	F56F10.4	WBGene00018987	chrX	chrX:864739-871078	4.87859	24.34	2.31879	0.000437009	yes
F58B3.4	F58B3.4	WBGene00010231	chrIV	chrIV:11628733-11631818	136.096	301.509	1.14758	0.0168395	yes
F58E2.4	F58E2.4	WBGene00019048	chrIV	chrIV:3463931-3466273	2.56146	22.1605	3.11296	0.00160272	yes
F58G1.1	F58G1.1	WBGene00010263	chrII	chrII:12919507-12923308	36.8431	13.4067	-1.45844	0.0128192	yes
F59A3.4	F59A3.4	WBGene00019077	chrI	chrI:5507125-5509172	145.107	42.6983	-1.76487	0.000954849	yes
F59B2.8	F59B2.8	WBGene00010310	chrIII	chrIII:9007896-9010044	12.6935	41.1266	1.69598	0.039255	yes
F59B8.2	F59B8.2	WBGene00010317	chrIV	chrIV:9439069-9440790	287.381	86.5803	-1.73085	0.000125938	yes
F59G1.8	F59G1.8	WBGene00019129	chrII	chrII:5906534-5907520	114.391	281.201	1.29763	0.0376064	yes
H04M03.3	H04M03.3	WBGene00019153	chrIV	chrIV:5891559-5893317	65.8647	7.34554	-3.16457	5.98e-05	yes
H06I04.3	H06I04.3	WBGene00019168	chrIII	chrIII:3070514-3085261	177.844	410.179	1.20564	0.0167871	yes
H19N07.4	H19N07.4	WBGene00010408	chrV	chrV:11119795-11122561	29.5037	4.82209	-2.61317	0.00095269	yes
H27M09.3	H27M09.3	WBGene00019247	chrI	chrI:6847509-6849922	93.7081	32.5115	-1.52723	0.00438032	yes
H36L18.1	H36L18.1	WBGene00010423	chrX	chrX:12648871-12651417	3.99403	0.0573072	-6.12298	0.0216728	yes
H40L08.1	H40L08.1	WBGene00010433	chrX	chrX:15080711-15084016	122.998	249.457	1.02016	0.0495492	yes
H43I07.3	H43I07.3	WBGene00019276	chrV	chrV:4195601-4199357	154.036	24.4747	-2.65391	1.14e-06	yes
K01D12.6	K01D12.6	WBGene00010465	chrV	chrV:12398739-12400838	354.979	97.1712	-1.86913	1.32e-05	yes
K02A6.3	K02A6.3	WBGene00019294	chrX	chrX:8228020-8231880	7.79643	191.699	4.61988	2.93e-08	yes
K02B12.2	K02B12.2	WBGene00010495	chrI	chrI:8511701-8512397	37.326	1.34228	-4.79743	0.00707217	yes
K02B12.3	K02B12.3	WBGene00010496	chrI	chrI:8509120-8511406	142.091	22.1659	-2.6804	5.56e-07	yes
K02E7.6	K02E7.6	WBGene00019311	chrII	chrII:1057189-1059287	8.70327	0.346631	-4.65009	0.027701	yes
K04C1.2	K04C1.2	WBGene00010552	chrX	chrX:14238638-14241275	9.46782	40.5928	2.10012	0.00356448	yes
K07B1.6	K07B1.6	WBGene00019466	chrV	chrV:9342770-9344194	488.146	52.8393	-3.20763	1.57e-11	yes
K07B1.8	K07B1.8	WBGene00019468	chrV	chrV:9339116-9340910	63.1112	149.098	1.24029	0.0297293	yes
K07H8.2	K07H8.2	WBGene00019504	chrIV	chrIV:8291525-8294583	193.581	44.4877	-2.12146	2.79e-05	yes
K08E3.5	K08E3.5	WBGene00010665	chrIII	chrIII:13763964-13767992	250.478	67.5775	-1.89007	8.18e-05	yes
K09E3.7	K09E3.7	WBGene00019578	chrX	chrX:17131410-17134418	0.355669	14.246	5.32387	0.00199093	yes
K09H9.2	K09H9.2	WBGene00019595	chrI	chrI:3147997-3150343	102.239	41.9506	-1.28518	0.0322757	yes
K10B2.4	K10B2.4	WBGene00019607	chrII	chrII:6360301-6360923	170.986	48.0322	-1.83181	0.0237436	yes
K10C3.5	K10C3.5	WBGene00010732	chrI	chrI:9863589-9869041	44.4716	118.613	1.41531	0.00348622	yes
K10D3.4	K10D3.4	WBGene00010738	chrI	chrI:7134736-7139972	37.2529	1.12005	-5.05571	2.91e-09	yes
M01F1.3	M01F1.3	WBGene00010809	chrIII	chrIII:3502824-3505213	45.4547	145.831	1.6818	0.0421228	yes
M01F1.7	M01F1.7	WBGene00010813	chrIII	chrIII:3521132-3529714	0.533702	7.0977	3.73324	0.027701	yes
M02D8.4	M02D8.4	WBGene00019730	chrX	chrX:8748382-8750917	21.5934	76.2672	1.82047	0.0124458	yes
M03B6.2	M03B6.2	WBGene00010834	chrX	chrX:13852837-13857256	1.47078	15.7705	3.42258	0.00604174	yes
M03F8.4	M03F8.4	WBGene00019763	chrV	chrV:5930898-5933412	8.19073	52.5962	2.68289	0.000356542	yes
M116.5	M116.5	WBGene00019792	chrIV	chrIV:8414279-8420995	21.5315	60.2363	1.48418	0.00269484	yes
M151.3	M151.3	WBGene00019795	chrII	chrII:3627200-3630863	17.9365	2.07911	-3.10886	0.000579373	yes
M60.4	M60.4	WBGene00019780	chrX	chrX:8232304-8236263	4.64704	197.603	5.41015	2.29e-05	yes
M60.6	M60.6	WBGene00019781	chrX	chrX:8248155-8252407	15.2019	74.196	2.28709	0.000557671	yes
M70.4	M70.4	WBGene00019786	chrIV	chrIV:2253010-2263660	8.02924	22.4325	1.48226	0.044455	yes
ZC410.3	ZC410.3	WBGene00013881	chrIV	chrIV:9074655-9078582	185.273	66.518	-1.47783	0.00943542	yes
R02D3.3	R02D3.3	WBGene00019821	chrIV	chrIV:225439-231774	94.262	208.081	1.1424	0.0237436	yes
R02D3.8	R02D3.8	WBGene00019825	chrIV	chrIV:255988-257189	92.797	29.6561	-1.64575	0.0222672	yes
R02F2.1	R02F2.1	WBGene00019831	chrIII	chrIII:5501821-5506357	348.805	131.004	-1.4128	0.00364426	yes
R02F2.9	R02F2.9	WBGene00019838	chrIII	chrIII:5499184-5499928	156.27	51.2455	-1.60854	0.0244594	yes
R03E9.2	R03E9.2	WBGene00019843	chrX	chrX:6729957-6733250	13.7665	2.06656	-2.73586	0.0201211	yes
R04A9.5	R04A9.5	WBGene00019864	chrX	chrX:384382-388798	7.53419	31.0724	2.04411	0.00850367	yes
R04D3.3	R04D3.3	WBGene00011011	chrX	chrX:13288926-13290559	105.872	14.6257	-2.85575	1.97e-06	yes
R05D3.1	R05D3.1	WBGene00019876	chrIII	chrIII:8381643-8387427	46.8946	109.223	1.21979	0.0116131	yes
R05D7.2	R05D7.2	WBGene00011027	chrI	chrI:12165719-12168013	0.0083737	11.1422	10.3779	0.0420782	yes
R06B9.3	R06B9.3	WBGene00011054	chrII	chrII:13758344-13761151	9.01021	52.206	2.53458	0.000274312	yes
R07G3.7	R07G3.7	WBGene00019943	chrII	chrII:7610939-7614386	26.9767	8.32365	-1.69643	0.0403359	yes
R08D7.2	R08D7.2	WBGene00011143	chrIII	chrIII:8967839-8969550	269.853	94.6382	-1.51168	0.00126995	yes
R08E3.3	R08E3.3	WBGene00019959	chrX	chrX:4818568-4821678	13.9787	77.5927	2.47269	8.8e-05	yes
R09A8.2	R09A8.2	WBGene00011153	chrX	chrX:12619403-12623236	0.475863	6.71183	3.81809	0.0376871	yes
R09E12.3	R09E12.3	WBGene00019983	chrV	chrV:773550-774855	393.906	105.713	-1.89771	2.79e-05	yes
R09F10.8	R09F10.8	WBGene00019989	chrX	chrX:8325081-8326400	166.637	57.5928	-1.53275	0.00469762	yes
R11A5.4	R11A5.4	WBGene00011232	chrI	chrI:7866126-7875555	88.2509	436.056	2.30483	4.46e-06	yes
R11A8.1	R11A8.1	WBGene00011236	chrIV	chrIV:10355101-10357141	20.7836	87.4393	2.07284	0.000125938	yes
R11D1.1	R11D1.1	WBGene00011242	chrV	chrV:12704364-12707741	43.6639	115.66	1.40538	0.00622382	yes
R11D1.9	R11D1.9	WBGene00011247	chrV	chrV:12728613-12729398	259.783	61.7154	-2.07361	0.000356542	yes
R11H6.2	R11H6.2	WBGene00011250	chrV	chrV:14597923-14600076	204.768	33.4473	-2.61403	3.38e-08	yes
R12B2.2	R12B2.2	WBGene00020018	chrIII	chrIII:5807773-5809082	35.0824	141.667	2.01368	0.00722974	yes
R12C12.6	R12C12.6	WBGene00020026	chrII	chrII:6046260-6047840	190.199	45.9469	-2.04947	0.00161584	yes
R148.4	R148.4	WBGene00020103	chrIII	chrIII:3171657-3172722	340.705	121.217	-1.49093	0.00538845	yes
R151.1	R151.1	WBGene00020106	chrIII	chrIII:7216463-7219554	4.7812	32.6069	2.76973	0.0044678	yes
R151.2	R151.2	WBGene00020107	chrIII	chrIII:7210010-7215211	791.663	91.1496	-3.11858	9.62e-13	yes
R74.8	R74.8	WBGene00011282	chrIII	chrIII:4206250-4208239	271.509	74.3367	-1.86885	3.76e-05	yes
T01B6.3	T01B6.3	WBGene00020135	chrX	chrX:2314910-2319325	2.74836	33.6088	3.6122	0.0162005	yes
T02C12.2	T02C12.2	WBGene00011367	chrIII	chrIII:4020040-4021754	765.075	263.566	-1.53744	0.000278137	yes
T02E9.5	T02E9.5	WBGene00011383	chrV	chrV:11342223-11344717	33.6074	1.14079	-4.88067	0.00107572	yes
T02G6.5	T02G6.5	WBGene00011388	chrI	chrI:11817231-11819224	115.983	5.73572	-4.33779	3.02e-08	yes
T02H6.11	T02H6.11	WBGene00020181	chrII	chrII:700488-701134	387.198	163.748	-1.2416	0.0338377	yes
T03D3.5	T03D3.5	WBGene00020183	chrV	chrV:2823829-2826824	5.26849	48.6708	3.20759	0.00024493	yes
T03F1.1	T03F1.1	WBGene00020184	chrI	chrI:3874039-3875994	58.3511	10.2706	-2.50624	0.000210693	yes
T03F1.6	T03F1.6	WBGene00020188	chrI	chrI:3839878-3841542	32.5126	5.2932	-2.61879	0.00769527	yes
T03G11.6	T03G11.6	WBGene00020199	chrX	chrX:5177495-5179166	570.301	58.8864	-3.27572	0	yes
T04B8.2	T04B8.2	WBGene00020204	chrII	chrII:630081-631986	14.7204	0.719809	-4.35406	0.0144197	yes
T04D3.5	T04D3.5	WBGene00011434	chrI	chrI:13325607-13333325	795.554	121.232	-2.71419	2.1e-10	yes
T04G9.1	T04G9.1	WBGene00020214	chrX	chrX:788351-796141	1.80144	12.7643	2.82489	0.000164879	yes
T05B9.1	T05B9.1	WBGene00011464	chrII	chrII:11260022-11261192	386.938	141.311	-1.45323	0.00213596	yes
T05D4.1	T05D4.1	WBGene00011474	chrIII	chrIII:13563239-13564889	2.48242	17.1124	2.78522	0.0380752	yes
T05H10.4	T05H10.4	WBGene00011509	chrII	chrII:8053084-8054913	42.0727	6.92984	-2.60199	0.000669894	yes
T05H10.7	T05H10.7	WBGene00011511	chrII	chrII:8062690-8073320	32.8525	137.762	2.06811	0.0211573	yes
T07D3.9	T07D3.9	WBGene00020311	chrII	chrII:898065-900744	13.7239	0.86946	-3.98042	0.00601607	yes
T07D4.5	T07D4.5	WBGene00045407	chrII	chrII:8883706-8884290	343.891	98.5048	-1.80369	0.00294867	yes
T08G11.1	T08G11.1	WBGene00011629	chrI	chrI:8905632-8916798	55.2385	119.372	1.11171	0.0204303	yes
T09B9.4	T09B9.4	WBGene00011645	chrX	chrX:9771655-9774296	118.528	34.1653	-1.79462	0.00027293	yes
T10B5.3	T10B5.3	WBGene00020389	chrV	chrV:1864179-1868566	55.0001	131.682	1.25956	0.0271776	yes
T10D4.3	T10D4.3	WBGene00020407	chrII	chrII:3129181-3131291	1.6895	28.4865	4.07561	0.00645405	yes
T11F8.1	T11F8.1	WBGene00020433	chrIV	chrIV:5479583-5480569	79.008	6.88515	-3.52044	6.13e-05	yes
T12A2.8	T12A2.8	WBGene00020442	chrIII	chrIII:6244644-6248182	351.996	164.253	-1.09964	0.0253956	yes
T12D8.8	T12D8.8	WBGene00011735	chrIII	chrIII:13614609-13622388	324.114	152.088	-1.0916	0.0322757	yes
T13C2.6	T13C2.6	WBGene00020481	chrII	chrII:6783381-6788224	61.3535	13.726	-2.16023	0.000130178	yes
T13F2.6	T13F2.6	WBGene00011746	chrIV	chrIV:9778267-9784658	408.243	113.232	-1.85014	9.09e-06	yes
T16G1.9	T16G1.9	WBGene00011802	chrV	chrV:12944844-12950642	14.6707	2.73124	-2.42531	0.00403275	yes
T16G12.8	T16G12.8	WBGene00011809	chrIII	chrIII:10059210-10061828	150.954	25.4331	-2.56933	4.76e-06	yes
T19A6.1	T19A6.1	WBGene00011827	chrI	chrI:8375483-8392732	374.064	84.3886	-2.14817	0.000765668	yes
T19B10.6	T19B10.6	WBGene00011834	chrV	chrV:11237430-11239305	647.208	202.919	-1.67333	9.17e-05	yes
T21C9.13	T21C9.13	WBGene00011898	chrV	chrV:10597293-10598643	34.7869	110.403	1.66616	0.00320386	yes
T21C9.4	T21C9.4	WBGene00011892	chrV	chrV:10578404-10579089	1738.63	783.087	-1.1507	0.0140263	yes
T22E7.1	T22E7.1	WBGene00020693	chrI	chrI:5768965-5773620	12.2879	91.0672	2.8897	1.54e-06	yes
T23D8.3	T23D8.3	WBGene00011944	chrI	chrI:9973370-9976305	152.47	444.84	1.54476	0.000401882	yes
T23G7.3	T23G7.3	WBGene00011966	chrII	chrII:9165867-9167769	245.157	671.224	1.45309	0.000930562	yes
T24B8.3	T24B8.3	WBGene00011977	chrII	chrII:9059327-9061078	72.4028	251.865	1.79854	0.00166778	yes
T24C12.3	T24C12.3	WBGene00020765	chrX	chrX:2196517-2203887	8.22508	0.488223	-4.07442	0.012267	yes
T24C4.5	T24C4.5	WBGene00020761	chrIII	chrIII:877609-879563	14.8834	48.6197	1.70784	0.0240372	yes
T25G12.11	T25G12.11	WBGene00020817	chrX	chrX:17236827-17237781	14.3954	110.987	2.94671	7.72e-05	yes
T26A5.2	T26A5.2	WBGene00020819	chrIII	chrIII:6467329-6471576	64.0971	169.305	1.4013	0.0204303	yes
T26A8.1	T26A8.1	WBGene00020824	chrIV	chrIV:8433024-8437966	158.676	59.5076	-1.41494	0.00220689	yes
T26F2.3	T26F2.3	WBGene00045401	chrV	chrV:13979555-13980892	0.306302	28.1054	6.51975	0.00915893	yes
T27A3.1	T27A3.1	WBGene00020838	chrI	chrI:6122591-6126853	1.46779	21.538	3.87516	0.0214206	yes
T27F2.2	T27F2.2	WBGene00012100	chrV	chrV:11631425-11637188	3.00587	14.4797	2.26818	0.00428607	yes
T28B11.1	T28B11.1	WBGene00012117	chrV	chrV:10713110-10732402	71.524	647.487	3.17835	0	yes
T28F4.4	T28F4.4	WBGene00012139	chrI	chrI:7486572-7490170	36.1598	80.9474	1.1626	0.0362345	yes
Y39E4A.3	Y39E4A.3	WBGene00012713	chrIII	chrIII:12967840-12972397	48.3904	12.1927	-1.9887	0.00312623	yes
W02A11.1	W02A11.1	WBGene00012192	chrI	chrI:12730012-12732695	86.0044	31.3874	-1.45423	0.0338377	yes
W02A2.8	W02A2.8	WBGene00012191	chrIV	chrIV:13356167-13358557	8.55355	64.2241	2.90852	0.00703465	yes
W02D9.10	W02D9.10	WBGene00012216	chrI	chrI:12551527-12552334	2.67439	30.7217	3.52197	0.0313021	yes
W03A5.2	W03A5.2	WBGene00020967	chrIII	chrIII:5406076-5407929	80.1204	201.187	1.3283	0.0211473	yes
W03F9.1	W03F9.1	WBGene00020999	chrV	chrV:124045-126745	129.003	24.9117	-2.37251	3.87e-06	yes
W03G9.2	W03G9.2	WBGene00021014	chrI	chrI:4962452-4964239	28.2359	78.8908	1.48233	0.0112909	yes
W03G9.8	W03G9.8	WBGene00044431	chrI	chrI:4957776-4958310	269.453	77.6694	-1.79461	0.010371	yes
W04A8.4	W04A8.4	WBGene00012239	chrI	chrI:13841882-13843234	312.047	52.1953	-2.57977	2.05e-06	yes
W04D2.5	W04D2.5	WBGene00012244	chrV	chrV:12493220-12494605	115.072	318.562	1.46904	0.00373739	yes
W04G3.1	W04G3.1	WBGene00012255	chrX	chrX:11059927-11061802	29.4344	4.04297	-2.86402	0.00739597	yes
W05F2.6	W05F2.6	WBGene00021038	chrI	chrI:3368815-3371444	253.296	84.6474	-1.58129	0.000694752	yes
W05H9.2	W05H9.2	WBGene00021049	chrX	chrX:6267012-6271015	28.0963	64.4719	1.19829	0.0246436	yes
W05H9.3	W05H9.3	WBGene00021050	chrX	chrX:6252239-6253743	572.09	161.058	-1.82866	1.17e-05	yes
W05H9.4	W05H9.4	WBGene00021051	chrX	chrX:6263611-6266873	18.3421	50.188	1.45218	0.00924442	yes
W06A11.4	W06A11.4	WBGene00021055	chrII	chrII:4055941-4057656	4.31988	27.1744	2.65318	0.0287776	yes
W06E11.7	W06E11.7	WBGene00021065	chrIII	chrIII:647122-654460	64.94	21.3707	-1.60347	0.0270208	yes
W07E11.1	W07E11.1	WBGene00012326	chrX	chrX:10083946-10104004	14.2934	76.4679	2.41951	1.56e-08	yes
W07E6.5	W07E6.5	WBGene00021076	chrII	chrII:476554-477795	55.9198	217.188	1.95751	0.00042229	yes
W07G4.3	W07G4.3	WBGene00012337	chrV	chrV:13036980-13041706	90.3465	37.2796	-1.27708	0.0158185	yes
W07G4.4	W07G4.4	WBGene00002250	chrV	chrV:13043696-13046340	133.672	58.3297	-1.19639	0.0203434	yes
W08A12.4	W08A12.4	WBGene00021081	chrV	chrV:3674601-3676619	0.325537	193.063	9.21203	0.00075966	yes
W08E3.4	W08E3.4	WBGene00012345	chrI	chrI:13337448-13338910	9.04978	47.8797	2.40346	0.0167871	yes
W08F4.3	W08F4.3	WBGene00021093	chrII	chrII:580598-582009	119.674	28.1848	-2.08612	0.00107739	yes
W09C3.3	W09C3.3	WBGene00021111	chrI	chrI:4707905-4708763	2.25504	42.8548	4.24823	0.034183	yes
W09C5.1	W09C5.1	WBGene00012351	chrI	chrI:13626510-13628438	185.73	377.115	1.02179	0.0498691	yes
W09D6.1	W09D6.1	WBGene00012356	chrIII	chrIII:11068758-11072882	7.66092	30.4165	1.98926	0.00416859	yes
W10D9.2	W10D9.2	WBGene00021130	chrII	chrII:449153-453148	20.3748	0.915552	-4.476	0.0314374	yes
Y102A11A.8	Y102A11A.8	WBGene00022418	chrX	chrX:2039415-2046340	52.1309	3.60404	-3.85445	7.15e-07	yes
Y105C5A.1	Y105C5A.1	WBGene00013632	chrIV	chrIV:15550821-15554688	3.13121	22.5455	2.84805	0.000454128	yes
Y105E8A.2	Y105E8A.2	WBGene00013667	chrI	chrI:14347501-14358313	24.0458	77.365	1.6859	0.00220689	yes
Y105E8A.24	Y105E8A.24	WBGene00013681	chrI	chrI:14567322-14580967	14.4613	44.0601	1.60728	0.00257155	yes
Y105E8A.29	Y105E8A.29	WBGene00013686	chrI	chrI:14585399-14604127	8.21434	26.151	1.67065	0.04295	yes
Y105E8B.3	Y105E8B.3	WBGene00013688	chrI	chrI:14652104-14657264	51.0253	178.223	1.8044	9.13e-05	yes
Y110A2AL.4	Y110A2AL.4	WBGene00022441	chrII	chrII:2839308-2840391	75.2375	3.55485	-4.40359	0.0444835	yes
Y110A2AR.1	Y110A2AR.1	WBGene00022452	chrII	chrII:2919718-2920825	104.778	20.0487	-2.38575	0.000231489	yes
Y119D3B.11	Y119D3B.11	WBGene00022488	chrIII	chrIII:1208121-1213641	107.497	48.2219	-1.15653	0.0373144	yes
Y17G7B.20	Y17G7B.20	WBGene00012471	chrII	chrII:11977718-11979795	201.205	69.7786	-1.52781	0.0106365	yes
Y17G7B.8	Y17G7B.8	WBGene00012462	chrII	chrII:12025856-12027682	7.89345	36.6112	2.21356	0.0246436	yes
Y18D10A.11	Y18D10A.11	WBGene00012481	chrI	chrI:12861961-12863522	315.331	141.4	-1.15709	0.0229054	yes
Y22D7AL.10	Y22D7AL.10	WBGene00021248	chrIII	chrIII:1617141-1618945	117.169	27.4844	-2.0919	0.00745974	yes
Y25C1A.5	Y25C1A.5	WBGene00021292	chrII	chrII:3078798-3087681	87.1006	30.4035	-1.51844	0.00190599	yes
Y2H9A.6	Y2H9A.6	WBGene00086568	chrV	chrV:13444101-13445041	0.341806	25.1476	6.2011	0.0379778	yes
Y32B12B.2	Y32B12B.2	WBGene00012522	chrV	chrV:16538374-16549833	24.3985	57.5755	1.23866	0.0314901	yes
Y37B11A.2	Y37B11A.2	WBGene00021344	chrIII	chrIII:5774636-5781974	3.01276	18.8646	2.64653	0.000377268	yes
Y37D8A.4	Y37D8A.4	WBGene00012546	chrIII	chrIII:12829266-12838852	20.8218	0.890967	-4.54658	0.0271759	yes
Y37E11AR.3	Y37E11AR.3	WBGene00021370	chrIV	chrIV:3735837-3738931	53.7235	152.631	1.50642	0.0080982	yes
Y37E11B.6	Y37E11B.6	WBGene00021378	chrIV	chrIV:3598652-3599234	371.512	148.509	-1.32286	0.0379778	yes
Y38F1A.1	Y38F1A.1	WBGene00012605	chrII	chrII:12952420-12954717	8.53523	112.414	3.71925	3.43e-06	yes
Y38F1A.6	Y38F1A.6	WBGene00012608	chrII	chrII:12994288-12996278	9.77376	31.1691	1.67313	0.0423994	yes
Y38F2AR.3	Y38F2AR.3	WBGene00021421	chrIV	chrIV:2384009-2387920	32.6713	106.014	1.69816	0.00974233	yes
Y39A1A.9	Y39A1A.9	WBGene00012648	chrIII	chrIII:10629978-10633402	1.45813	12.1363	3.05713	0.0236609	yes
Y39B6A.13	Y39B6A.13	WBGene00012675	chrV	chrV:19118483-19119338	317.147	111.895	-1.503	0.00643528	yes
Y39E4B.2	Y39E4B.2	WBGene00012715	chrIII	chrIII:13165635-13169410	57.5839	22.3178	-1.36747	0.0424185	yes
Y39G10AR.9	Y39G10AR.9	WBGene00021467	chrI	chrI:2306986-2308914	112.185	47.2673	-1.24696	0.0344064	yes
Y41D4A.4	Y41D4A.4	WBGene00021506	chrIV	chrIV:1745952-1751700	132.676	27.6385	-2.26315	2.16e-06	yes
Y41D4B.26	Y41D4B.26	WBGene00021525	chrIV	chrIV:1631949-1633205	19.7476	0.0276858	-9.47831	0.0135542	yes
Y41E3.7	Y41E3.7	WBGene00012765	chrIV	chrIV:15014009-15025466	101.705	34.8805	-1.5439	0.0161414	yes
Y42G9A.4	Y42G9A.4	WBGene00021534	chrIII	chrIII:6124115-6136224	50.5226	114.769	1.18373	0.0379778	yes
Y43B11AR.3	Y43B11AR.3	WBGene00021544	chrIV	chrIV:7082264-7083603	37.4461	141.778	1.92074	0.000287822	yes
Y43F4B.10	Y43F4B.10	WBGene00012807	chrIII	chrIII:13313935-13314620	173.582	43.1774	-2.00727	0.00723624	yes
Y43F8B.2	Y43F8B.2	WBGene00012813	chrV	chrV:19503081-19533080	1073.75	304.915	-1.81618	0.000304979	yes
Y43F8C.3	Y43F8C.3	WBGene00012825	chrV	chrV:19614527-19622430	16.9721	2.63903	-2.68508	0.00340146	yes
Y44E3A.6	Y44E3A.6	WBGene00021551	chrI	chrI:3340222-3349902	78.0612	209.996	1.42768	0.00488486	yes
Y45G5AM.7	Y45G5AM.7	WBGene00021559	chrV	chrV:4166824-4169821	361.944	140.125	-1.36905	0.00294867	yes
Y46E12BL.3	Y46E12BL.3	WBGene00021596	chrII	chrII:15230285-15232722	1475.37	16.115	-6.51653	0	yes
Y46E12BL.4	Y46E12BL.4	WBGene00021597	chrII	chrII:15207366-15226652	43.6455	1.35362	-5.01094	3.71e-06	yes
Y47D3A.13	Y47D3A.13	WBGene00012926	chrIII	chrIII:11223346-11224004	2.04046	35.8783	4.13614	0.037072	yes
Y47G6A.25	Y47G6A.25	WBGene00021649	chrI	chrI:3606413-3608348	395.717	121.87	-1.69912	0.000117598	yes
Y47G6A.7	Y47G6A.7	WBGene00021637	chrI	chrI:3502740-3508427	4.52392	21.0377	2.21733	0.0405874	yes
Y47G7B.2	Y47G7B.2	WBGene00021654	chrII	chrII:2706000-2707987	23.8715	286.651	3.58594	0	yes
Y48C3A.14	Y48C3A.14	WBGene00012995	chrII	chrII:13389690-13401921	15.2542	62.0276	2.0237	7.03e-05	yes
Y48G1A.2	Y48G1A.2	WBGene00021658	chrI	chrI:343117-348367	489.038	93.5836	-2.38562	0.000318144	yes
Y48G1BM.5	Y48G1BM.5	WBGene00021670	chrI	chrI:229090-234973	4.52073	30.5957	2.7587	2.71e-05	yes
Y48G1C.1	Y48G1C.1	WBGene00021676	chrI	chrI:93030-94881	202.568	63.9803	-1.6627	0.000454606	yes
Y48G9A.3	Y48G9A.3	WBGene00021697	chrIII	chrIII:2151957-2197892	30.5925	115.038	1.91086	5.92e-06	yes
Y49F6B.2	Y49F6B.2	WBGene00021715	chrII	chrII:3502970-3504912	78.6474	23.4836	-1.74374	0.0252025	yes
Y4C6A.3	Y4C6A.3	WBGene00021153	chrIV	chrIV:5450984-5452417	1455.4	44.2531	-5.03949	0	yes
Y4C6B.5	Y4C6B.5	WBGene00021159	chrIV	chrIV:5319244-5325023	4.78702	19.6324	2.03603	0.0472082	yes
Y50D4A.1	Y50D4A.1	WBGene00021735	chrV	chrV:1207889-1219847	37.0004	143.612	1.95657	1.79e-05	yes
Y51F10.10	Y51F10.10	WBGene00021771	chrI	chrI:1950604-1958514	238.788	80.4643	-1.56931	0.00134437	yes
Y51H4A.1	Y51H4A.1	WBGene00013098	chrIV	chrIV:16474094-16477159	18.6664	0	-1.79769e+308	0.0330676	yes
Y53C12B.2	Y53C12B.2	WBGene00013144	chrII	chrII:9738922-9742825	123.152	327.563	1.41133	0.00206744	yes
Y54E10BR.4	Y54E10BR.4	WBGene00021843	chrI	chrI:3015743-3021521	56.1773	135.09	1.26586	0.0253956	yes
Y54F10BM.9	Y54F10BM.9	WBGene00021863	chrIII	chrIII:2295332-2304904	20.4365	59.7387	1.54752	0.00240644	yes
Y54G11A.3	Y54G11A.3	WBGene00013214	chrII	chrII:14276574-14283883	717.518	268.519	-1.41799	0.00125789	yes
Y54G11A.7	Y54G11A.7	WBGene00013216	chrII	chrII:14297220-14301974	2.1824	37.242	4.09294	0.000512728	yes
Y54G2A.23	Y54G2A.23	WBGene00021888	chrIV	chrIV:2927512-2928421	73.1272	17.7215	-2.04491	0.0187842	yes
Y54G2A.36	Y54G2A.36	WBGene00021898	chrIV	chrIV:2896967-2901646	65.8648	327.177	2.31249	1.3e-05	yes
Y54G2A.40	Y54G2A.40	WBGene00044495	chrIV	chrIV:2846541-2851280	6.19979	20.7535	1.74307	0.0472237	yes
Y55B1BR.3	Y55B1BR.3	WBGene00021913	chrIII	chrIII:429298-431749	5.93009	0.451232	-3.71611	0.0204909	yes
Y55D5A.2	Y55D5A.2	WBGene00021916	chrIII	chrIII:2968957-2969869	85.7781	353.22	2.04189	0.0225176	yes
Y55F3AM.3	Y55F3AM.3	WBGene00021921	chrIV	chrIV:1012651-1019687	880.534	172.036	-2.35567	0.03159	yes
Y57A10B.6	Y57A10B.6	WBGene00013278	chrII	chrII:12390080-12392513	5.67893	0.166807	-5.08937	0.03159	yes
Y57G11B.1	Y57G11B.1	WBGene00013294	chrIV	chrIV:14549798-14551929	0.944165	21.2351	4.49127	0.0140513	yes
Y57G11C.15	Y57G11C.15	WBGene00013311	chrIV	chrIV:14822507-14825146	1966.54	580.424	-1.76048	0.000127644	yes
Y59A8A.3	Y59A8A.3	WBGene00013340	chrV	chrV:17845717-17855965	159.242	30.37	-2.39051	1.76e-07	yes
Y59E9AL.7	Y59E9AL.7	WBGene00043064	chrIV	chrIV:5207580-5215186	687.221	132.1	-2.37914	0.00294867	yes
Y5F2A.4	Y5F2A.4	WBGene00012385	chrIV	chrIV:11076074-11078561	30.7095	90.1517	1.55367	0.00586581	yes
Y62E10A.10	Y62E10A.10	WBGene00013378	chrIV	chrIV:13380362-13381899	90.4216	208.452	1.20498	0.0378936	yes
Y62E10A.11	Y62E10A.11	WBGene00014938	chrIV	chrIV:13386269-13387337	203.111	75.2497	-1.43251	0.0112304	yes
Y65B4A.3	Y65B4A.3	WBGene00022027	chrI	chrI:636849-637855	823.339	380.124	-1.11501	0.0214206	yes
Y65B4BR.5	Y65B4BR.5	WBGene00022042	chrI	chrI:535791-536673	322.23	851.467	1.40186	0.00248163	yes
Y66D12A.10	Y66D12A.10	WBGene00013436	chrIII	chrIII:11565733-11567903	441.228	147.222	-1.58353	0.000791632	yes
Y66D12A.9	Y66D12A.9	WBGene00013435	chrIII	chrIII:11568036-11573178	119.067	29.7047	-2.00301	0.00212034	yes
Y66H1B.2	Y66H1B.2	WBGene00022048	chrIV	chrIV:359238-364340	143.676	526.795	1.87442	8.8e-05	yes
Y66H1B.3	Y66H1B.3	WBGene00022049	chrIV	chrIV:370292-376064	14.5832	43.3081	1.57033	0.00424278	yes
Y66H1B.5	Y66H1B.5	WBGene00022050	chrIV	chrIV:367122-369032	53.8221	190.834	1.82604	0.000175075	yes
Y67H2A.7	Y67H2A.7	WBGene00013464	chrIV	chrIV:13303721-13310778	18.9566	78.7443	2.05447	5.86e-05	yes
Y69A2AR.16	Y69A2AR.16	WBGene00022087	chrIV	chrIV:2504325-2530287	54.5905	122.431	1.16525	0.0167988	yes
Y69A2AR.18	Y69A2AR.18	WBGene00022089	chrIV	chrIV:2495733-2497682	125.735	287.366	1.1925	0.0379778	yes
Y71F9B.6	Y71F9B.6	WBGene00022128	chrI	chrI:2722520-2726653	31.1736	4.85885	-2.68164	0.00173312	yes
Y71H2AM.10	Y71H2AM.10	WBGene00022175	chrIII	chrIII:2707735-2714918	6.47593	20.3013	1.64841	0.033793	yes
Y71H2AM.16	Y71H2AM.16	WBGene00022181	chrIII	chrIII:2757159-2760808	3.09372	19.3816	2.64727	0.0214206	yes
Y71H2AM.5	Y71H2AM.5	WBGene00022170	chrIII	chrIII:2786193-2788020	333.015	53.0082	-2.6513	2.61e-06	yes
Y71H2B.11	Y71H2B.11	WBGene00022198	chrIII	chrIII:2605220-2606491	36.74	170.728	2.21627	0.00027293	yes
Y71H2B.5	Y71H2B.5	WBGene00022195	chrIII	chrIII:2608009-2618847	17.0748	42.1449	1.30349	0.0240756	yes
Y73B3A.1	Y73B3A.1	WBGene00022203	chrX	chrX:42874-47060	49.3226	20.3267	-1.27887	0.0477268	yes
Y73B3A.18	Y73B3A.18	WBGene00022219	chrX	chrX:57928-60781	91.3786	268.043	1.55254	0.000888518	yes
Y73B3A.3	Y73B3A.3	WBGene00022205	chrX	chrX:84042-93664	4.92849	19.4955	1.98392	0.0240994	yes
Y73B6BL.21	Y73B6BL.21	WBGene00022242	chrIV	chrIV:6396602-6402416	12.998	0.128507	-6.6603	0.00460431	yes
Y73B6BL.31	Y73B6BL.31	WBGene00022252	chrIV	chrIV:6442275-6446520	8.72275	61.9494	2.82824	0.00255359	yes
Y73F8A.24	Y73F8A.24	WBGene00013529	chrIV	chrIV:15445347-15453155	24.039	95.2599	1.98649	0.000210693	yes
Y7A9D.1	Y7A9D.1	WBGene00012420	chrIV	chrIV:16381360-16382179	92.9028	13.6831	-2.76333	0.00604268	yes
Y81G3A.3	Y81G3A.3	WBGene00013591	chrII	chrII:13084098-13091416	16.8719	51.1613	1.60043	0.000555907	yes
Y82E9BR.1	Y82E9BR.1	WBGene00022334	chrIII	chrIII:1458224-1466724	9.24425	1.35589	-2.76932	0.0432829	yes
Y82E9BR.18	Y82E9BR.18	WBGene00022350	chrIII	chrIII:1467865-1483499	24.6511	64.1581	1.37998	0.00754166	yes
Y94H6A.4	Y94H6A.4	WBGene00022377	chrIV	chrIV:2673095-2674732	28.5435	106.977	1.90607	0.0106365	yes
Y94H6A.5	Y94H6A.5	WBGene00022378	chrIV	chrIV:2688944-2703975	54.7445	175.53	1.68093	0.00455432	yes
Y9D1A.1	Y9D1A.1	WBGene00021186	chrII	chrII:7446145-7448499	24.5653	108.074	2.13733	0.00023813	yes
ZC123.3	ZC123.3	WBGene00022518	chrI	chrI:803370-835287	3.02316	0.500433	-2.59481	0.0433054	yes
ZC168.3	ZC168.3	WBGene00013857	chrIV	chrIV:10732811-10734612	247.782	114.702	-1.11118	0.0323301	yes
ZC196.3	ZC196.3	WBGene00022547	chrV	chrV:8736651-8738415	0.798504	53.9431	6.07799	0.000275462	yes
ZC196.4	ZC196.4	WBGene00022548	chrV	chrV:8733365-8735673	0.0361259	16.9775	8.87638	0.0457657	yes
ZC196.6	ZC196.6	WBGene00022550	chrV	chrV:8726505-8728872	0	23.6138	1.79769e+308	0.00499499	yes
ZC239.6	ZC239.6	WBGene00022569	chrII	chrII:3209480-3211379	7.37167	42.8706	2.53993	0.000292918	yes
ZC308.4	ZC308.4	WBGene00022586	chrI	chrI:6368272-6369600	243.579	33.5619	-2.85949	1.28e-07	yes
ZC317.7	ZC317.7	WBGene00022590	chrV	chrV:5468668-5470981	32.6989	83.4585	1.35182	0.0154502	yes
ZC373.1	ZC373.1	WBGene00013866	chrX	chrX:10054222-10057466	8.24572	1.26805	-2.70103	0.029152	yes
ZC410.5	ZC410.5	WBGene00013882	chrIV	chrIV:9088595-9092177	7.40542	78.6315	3.40845	0.00980004	yes
ZC443.3	ZC443.3	WBGene00013898	chrV	chrV:12812300-12814107	7.06833	31.1624	2.14036	0.0124458	yes
ZC443.4	ZC443.4	WBGene00013899	chrV	chrV:12816903-12819292	5.839	32.9487	2.49643	0.00112615	yes
ZK1053.4	ZK1053.4	WBGene00014199	chrI	chrI:13241652-13244719	17.9308	3.90526	-2.19895	0.0134115	yes
ZK1248.15	ZK1248.15	WBGene00022883	chrII	chrII:5836755-5838532	120.613	47.906	-1.33211	0.019084	yes
ZK1290.10	ZK1290.10	WBGene00022891	chrII	chrII:7549286-7553858	0	18.3665	1.79769e+308	0.0211625	yes
ZK177.8	ZK177.8	WBGene00022673	chrII	chrII:5509016-5513731	110.139	41.3612	-1.41298	0.0204303	yes
ZK265.9	ZK265.9	WBGene00044094	chrI	chrI:8253445-8254920	37.318	10.1192	-1.88277	0.0404192	yes
ZK430.1	ZK430.1	WBGene00022739	chrII	chrII:4425210-4432613	70.2164	138.987	0.985074	0.0499173	yes
ZK616.6	ZK616.6	WBGene00022776	chrIV	chrIV:5393838-5394841	128.461	36.23	-1.82607	0.00661539	yes
ZK637.14	ZK637.14	WBGene00014031	chrIII	chrIII:8887670-8890069	434.791	50.0988	-3.11747	5.87e-05	yes
ZK643.1	ZK643.1	WBGene00014033	chrIII	chrIII:8934157-8935341	2.03263	24.2	3.57359	0.0269419	yes
ZK643.2	ZK643.2	WBGene00014034	chrIII	chrIII:8956404-8957645	236.822	83.6898	-1.50068	0.00652787	yes
ZK643.5	ZK643.5	WBGene00014036	chrIII	chrIII:8944737-8956119	73.5397	29.6943	-1.30834	0.044455	yes
ZK669.4	ZK669.4	WBGene00014054	chrII	chrII:7941099-7945157	25.587	6.12968	-2.06153	0.017294	yes
ZK688.5	ZK688.5	WBGene00022800	chrIII	chrIII:7885022-7891550	11.3886	46.9883	2.04471	0.000356085	yes
ZK792.5	ZK792.5	WBGene00014078	chrIV	chrIV:11684950-11688095	69.1964	180.533	1.38349	0.00308664	yes
ZK829.9	ZK829.9	WBGene00014097	chrIV	chrIV:11970510-11972629	44.384	2.59472	-4.09639	1.05e-06	yes
ZK856.12	ZK856.12	WBGene00014113	chrV	chrV:10212922-10216279	13.9153	37.6638	1.43651	0.0174014	yes
ZK858.5	ZK858.5	WBGene00014118	chrI	chrI:9135839-9138349	61.7875	154.423	1.3215	0.0135907	yes
aap-1	Y110A7A.10	WBGene00000001	chrI	chrI:5107845-5113755	128.432	270.799	1.07621	0.0470636	yes
abcf-1	F18E2.2	WBGene00006512	chrV	chrV:12761028-12763358	86.8867	192.679	1.149	0.0209751	yes
abcf-2	T27E9.7	WBGene00012097	chrIII	chrIII:13457594-13462492	168.301	441.002	1.38974	0.00269078	yes
abcf-3	F42A10.1	WBGene00018339	chrIII	chrIII:6173252-6176811	58.3473	175.084	1.58531	0.000403725	yes
abi-1	B0336.6	WBGene00015146	chrIII	chrIII:5690061-5692685	236.042	75.6912	-1.64085	0.000451097	yes
acbp-5	T12D8.3	WBGene00011731	chrIII	chrIII:13639841-13641587	157.569	46.2594	-1.76816	0.00143713	yes
acdh-11	Y45F3A.3	WBGene00012860	chrIII	chrIII:10566099-10571507	76.57	23.644	-1.6953	0.0122895	yes
acy-1	F17C8.1	WBGene00000068	chrIII	chrIII:4722176-4730835	5.21856	24.4798	2.22987	0.000245702	yes
B0238.10	B0238.10	WBGene00015074	chrV	chrV:5274059-5275528	107.067	24.0421	-2.15489	0.00061817	yes
adm-2	C04A11.4	WBGene00000074	chrX	chrX:13687902-13695703	9.52262	30.904	1.69836	0.00455999	yes
age-1	B0334.8	WBGene00000090	chrII	chrII:11518423-11526998	15.0354	42.8155	1.50977	0.00476458	yes
agr-1	F41G3.12	WBGene00018304	chrII	chrII:6760641-6775133	7.69648	1.06324	-2.85573	0.00294142	yes
akt-2	F28H6.1	WBGene00000103	chrX	chrX:14147630-14152000	3.18156	16.5066	2.37524	0.0480115	yes
alg-1	F48F7.1	WBGene00000105	chrX	chrX:13951192-13956187	4.49265	13.3882	1.57532	0.0237436	yes
alg-2	T07D3.7	WBGene00000106	chrII	chrII:873182-878952	24.3166	6.10181	-1.99463	0.00328087	yes
C39B5.6	C39B5.6	WBGene00016524	chrIII	chrIII:2197995-2206872	10.9883	34.5648	1.65333	0.027701	yes
anc-1	ZK973.6	WBGene00000140	chrI	chrI:4321095-4359081	4.09725	1.67042	-1.29445	0.0380752	yes
apa-2	T20B5.1	WBGene00000161	chrX	chrX:9336759-9343006	17.1383	51.0183	1.57379	0.00199093	yes
apb-3	R11A5.1	WBGene00000163	chrI	chrI:7853744-7859412	61.8388	132.968	1.1045	0.0303734	yes
ape-1	F46F3.4	WBGene00000146	chrV	chrV:11675923-11685250	27.4797	91.4818	1.73512	0.000226559	yes
arf-1.1	F45E4.1	WBGene00000190	chrIV	chrIV:7634820-7641847	3.4335	48.9764	3.83433	0.01475	yes
asb-2	F02E8.1	WBGene00000207	chrX	chrX:4469740-4471455	28.5596	126.8	2.15051	7.88e-05	yes
asc-1	Y53F4B.15	WBGene00000208	chrII	chrII:15039326-15048828	45.5781	120.546	1.40317	0.010624	yes
C27A7.5	C27A7.5	WBGene00007756	chrV	chrV:12154857-12162280	11.8129	156.843	3.73089	8.21e-12	yes
ast-1	T08H4.3	WBGene00020368	chrII	chrII:4127866-4134870	22.4557	0.388294	-5.85379	0.0025916	yes
atf-7	C07G2.2	WBGene00000223	chrIII	chrIII:4491600-4499012	195.45	59.9333	-1.70537	0.00243158	yes
ave-1	M01G5.6	WBGene00044341	chrIII	chrIII:1495513-1496019	174.876	44.8337	-1.96368	0.0254083	yes
bath-10	Y49F6C.4	WBGene00021726	chrII	chrII:3375145-3376717	16.257	0.60799	-4.74087	0.0286909	yes
bath-13	F40B1.1	WBGene00018223	chrII	chrII:2520969-2522049	1.57003	26.473	4.07566	0.0154964	yes
bath-24	B0047.3	WBGene00015014	chrII	chrII:2044706-2045590	29.4082	90.2542	1.61778	0.0370263	yes
bath-36	Y75B12B.4	WBGene00013569	chrV	chrV:15188428-15190909	43.8088	208.833	2.25306	0.000185111	yes
C33G3.4	C33G3.4	WBGene00007904	chrX	chrX:14071114-14076224	8.23608	1.19397	-2.78619	0.0192524	yes
bre-3	B0464.4	WBGene00000268	chrIII	chrIII:9469841-9485367	35.4661	12.1168	-1.54944	0.0228057	yes
btb-6	F45C12.7	WBGene00018438	chrII	chrII:1715167-1716481	39.3291	5.15241	-2.93228	0.00125641	yes
btf-1	F15D4.1	WBGene00000274	chrII	chrII:13200100-13215631	27.371	57.0281	1.05903	0.0404192	yes
byn-1	F57B9.5	WBGene00000276	chrIII	chrIII:6931943-6935807	140.985	356.388	1.3379	0.00304331	yes
cacn-1	W03H9.4	WBGene00012230	chrII	chrII:14133321-14142122	362.435	89.2742	-2.02141	1.2e-06	yes
cam-1	C01G6.8	WBGene00000289	chrII	chrII:9295859-9310244	100.33	8.35016	-3.5868	1.63e-12	yes
cav-1	T13F2.8	WBGene00000301	chrIV	chrIV:9772489-9773450	94.8343	30.7536	-1.62466	0.0305238	yes
cct-4	K01C8.10	WBGene00000379	chrII	chrII:8283610-8285661	208.874	464.894	1.15427	0.0155389	yes
cdc-25.1	K06A5.7	WBGene00000386	chrI	chrI:6469387-6471953	110.648	37.4993	-1.56105	0.00175227	yes
cdc-25.2	F16B4.8	WBGene00000387	chrV	chrV:1577689-1584934	6.65353	0.494345	-3.75053	0.0379634	yes
cdc-48.1	C06A1.1	WBGene00007352	chrII	chrII:10559957-10563347	398.603	183.668	-1.11785	0.0158185	yes
cdh-6	F15B9.7	WBGene00001475	chrV	chrV:13019052-13033358	11.4954	1.37383	-3.06479	3.17e-05	yes
cdh-8	F18F11.3	WBGene00017576	chrIV	chrIV:344342-358882	2.61314	0.00996602	-8.03455	0.0143097	yes
cdk-1	T05G5.3	WBGene00000405	chrIII	chrIII:9747346-9748767	356.247	143.482	-1.31201	0.00582213	yes
cdk-5	T27E9.3	WBGene00000407	chrIII	chrIII:13464589-13471206	455.849	146.886	-1.63386	0.00353909	yes
cdr-7	K01D12.13	WBGene00010472	chrV	chrV:12410859-12412048	66.3734	4.28962	-3.95168	0.0046649	yes
ced-12	Y106G6E.5	WBGene00000426	chrI	chrI:10222873-10226999	58.6529	145.726	1.31299	0.00562803	yes
ced-4	C35D10.9	WBGene00000418	chrIII	chrIII:4852288-4855130	54.4466	21.6989	-1.32722	0.0379778	yes
ceh-27	F46F3.1	WBGene00000449	chrV	chrV:11661651-11664679	41.029	3.41534	-3.58654	0.0011659	yes
ceh-32	W05E10.3	WBGene00000453	chrV	chrV:11701742-11705383	9.07851	0.110215	-6.36406	0.0132394	yes
ceh-34	C10G8.6	WBGene00000455	chrV	chrV:5314387-5319561	33.6439	0.870677	-5.27206	0.0204303	yes
ceh-38	F22D3.1	WBGene00000459	chrII	chrII:6951597-6955352	26.9172	63.1228	1.22963	0.0425056	yes
ceh-6	K02B12.1	WBGene00000431	chrI	chrI:8498108-8502406	12.4973	1.102	-3.50341	0.0167988	yes
ces-1	F43G9.11	WBGene00000468	chrI	chrI:8633942-8636038	35.1643	0.441356	-6.31602	0.000437771	yes
ces-2	ZK909.4	WBGene00000469	chrI	chrI:14961510-14965341	18.2868	0.555692	-5.04037	0.0153576	yes
cgef-1	C14A11.3	WBGene00006496	chrX	chrX:2785592-2799235	31.3498	150.134	2.25972	6.53e-05	yes
cgh-1	C07H6.5	WBGene00000479	chrIII	chrIII:7495253-7497768	208.7	53.9725	-1.95113	8.54e-06	yes
cgt-3	F59G1.1	WBGene00019127	chrII	chrII:5911300-5916887	304.397	63.1753	-2.26852	2.5e-07	yes
chn-1	T09B4.10	WBGene00000500	chrI	chrI:6181315-6183882	247.353	63.3188	-1.96587	6.13e-05	yes
cht-1	C04F6.3	WBGene00000503	chrX	chrX:3397593-3400007	17.5194	0.402191	-5.44493	0.000111639	yes
chtl-1	F35C8.7	WBGene00018037	chrX	chrX:5355605-5364290	16.5572	2.85363	-2.53659	0.0296925	yes
cic-1	H14E04.5	WBGene00000506	chrIII	chrIII:2394377-2401298	285.802	80.1325	-1.83456	0.00017073	yes
ckb-2	B0285.9	WBGene00000512	chrIII	chrIII:4367803-4370132	31.057	2.41724	-3.68348	0.000418123	yes
cku-70	Y47D3A.4	WBGene00000519	chrIII	chrIII:11154727-11168710	36.5718	103.309	1.49816	0.00258466	yes
clec-266	C25B8.4	WBGene00016088	chrX	chrX:6617403-6627938	661.337	8.91779	-6.21256	2.29e-05	yes
clec-88	K10B2.3	WBGene00019606	chrII	chrII:6365705-6366807	3068.76	50.9727	-5.91179	0	yes
clp-1	C06G4.2	WBGene00000542	chrIII	chrIII:7981001-7986262	47.9529	160.865	1.74616	0.000156373	yes
clp-7	Y77E11A.11	WBGene00000547	chrIV	chrIV:1435473-1446026	11.3852	43.9975	1.95026	0.000638503	yes
cmd-1	T21H3.3	WBGene00000552	chrV	chrV:1156269-1161554	125.464	43.6981	-1.52163	0.00451328	yes
cnd-1	C34E10.7	WBGene00000561	chrIII	chrIII:5240553-5242069	14.1046	0	-1.79769e+308	0.0323128	yes
col-50	T28F2.6	WBGene00000627	chrI	chrI:3651298-3652602	0.90179	422.962	8.87352	2.78e-08	yes
coq-2	F57B9.4	WBGene00000762	chrIII	chrIII:6935911-6939338	30.4195	108.296	1.83191	0.00867625	yes
cpb-3	B0414.5	WBGene00000772	chrI	chrI:5788637-5791755	74.5181	34.4428	-1.11339	0.0432829	yes
cpf-1	F28C6.3	WBGene00000773	chrII	chrII:8596248-8602421	1281.42	405.897	-1.65856	0.00022967	yes
cpg-3	R06C7.4	WBGene00011063	chrI	chrI:7244934-7246094	45.3147	402.644	3.15145	1.06e-11	yes
cpi-1	K08B4.6	WBGene00000535	chrIV	chrIV:6092588-6093636	13.942	72.8214	2.38492	0.0380752	yes
cpi-2	R01B10.1	WBGene00000534	chrV	chrV:6044044-6051244	326.628	1381.98	2.08102	3.92e-05	yes
cps-6	C41D11.8	WBGene00000787	chrI	chrI:4446593-4448464	84.8135	279.644	1.72123	0.00027344	yes
cpsf-4	F11A10.8	WBGene00044329	chrIV	chrIV:12092299-12093450	108.555	43.4906	-1.31965	0.0407877	yes
cpt-2	R07H5.2	WBGene00011122	chrIV	chrIV:11179621-11182979	36.231	120.807	1.73741	0.000292918	yes
ctns-1	C41C4.7	WBGene00008052	chrII	chrII:8134707-8136866	60.7556	176.206	1.53617	0.00264997	yes
cua-1	Y76A2A.2	WBGene00000834	chrIII	chrIII:13439626-13455206	28.6429	60.2979	1.07393	0.0420373	yes
cutc-1	ZK353.7	WBGene00022702	chrIII	chrIII:8402030-8403535	119.46	23.3965	-2.35216	6.11e-05	yes
cutl-2	Y53C12B.6	WBGene00013145	chrII	chrII:9721768-9724467	15.3556	0.749452	-4.35678	0.0244363	yes
cutl-9	M28.1	WBGene00010893	chrII	chrII:10622221-10626375	8.45253	0.27944	-4.91877	0.019731	yes
cyb-1	ZC168.4	WBGene00000865	chrIV	chrIV:10735303-10737155	139.033	34.0905	-2.02799	6.13e-05	yes
cyc-2.1	E04A4.7	WBGene00017121	chrIV	chrIV:4747893-4749774	611.576	1842.94	1.59141	0.00350867	yes
cyk-1	F11H8.4	WBGene00000872	chrIII	chrIII:7023587-7029139	22.5641	71.792	1.66979	0.000231489	yes
cyk-4	K08E3.6	WBGene00000875	chrIII	chrIII:13768440-13771141	388.443	107.089	-1.85889	7.39e-06	yes
cyp-35C1	C06B3.3	WBGene00007362	chrV	chrV:13896642-13898474	4.81406	0.0773057	-5.96054	0.0119328	yes
daf-1	F29C4.1	WBGene00000897	chrIV	chrIV:132415-138069	14.0895	1.79753	-2.97053	0.00300728	yes
daf-7	B0412.2	WBGene00000903	chrIII	chrIII:811821-813758	3.15609	17.1278	2.44013	0.028453	yes
dao-2	M03A1.7	WBGene00000928	chrII	chrII:4562849-4563543	26.3523	0.363826	-6.17854	0.0254907	yes
dct-3	C54D10.7	WBGene00008301	chrV	chrV:12437479-12443743	0.160892	69.2358	8.74928	0.000130486	yes
ddb-1	M18.5	WBGene00010890	chrIV	chrIV:12114789-12121143	81.5594	227.849	1.48216	0.00058547	yes
deps-1	Y65B4BL.2	WBGene00022034	chrI	chrI:506479-510840	374.468	131.952	-1.50483	0.000510297	yes
dhc-1	T21E12.4	WBGene00000962	chrI	chrI:4386787-4401981	42.3808	113.626	1.42281	0.00146803	yes
dis-3	C04G2.6	WBGene00001001	chrIV	chrIV:10097186-10106535	119.182	51.3302	-1.21529	0.0130758	yes
djr-1.2	C49G7.11	WBGene00016789	chrV	chrV:4054175-4055094	2.11149	56.5062	4.74208	0.00817588	yes
dlc-1	T26A5.9	WBGene00001005	chrIII	chrIII:6462854-6463727	548.954	79.7245	-2.78359	5.23e-08	yes
dod-6	T20G5.7	WBGene00011869	chrIII	chrIII:10197624-10198255	20.9849	1.69216	-3.63241	0.0440906	yes
dog-1	F33H2.1	WBGene00001049	chrI	chrI:15017271-15022969	61.8702	127.277	1.04066	0.0422218	yes
dpy-14	H27M09.4	WBGene00001075	chrI	chrI:6843593-6845133	298.416	33.5066	-3.15481	3.38e-08	yes
dpy-17	F54D8.1	WBGene00001076	chrIII	chrIII:5107288-5108460	27.4774	80.9696	1.55913	0.0216662	yes
dpy-22	F47A4.2	WBGene00001081	chrX	chrX:9810172-9822112	8.18	19.4445	1.24919	0.0154964	yes
dpy-27	R13G10.1	WBGene00001086	chrIII	chrIII:3813534-3819661	14.9695	68.8458	2.20134	8.27e-07	yes
dsl-3	Y41D4B.10	WBGene00001105	chrIV	chrIV:1610417-1612914	49.8226	8.05851	-2.62822	0.00476458	yes
dss-1	Y119D3B.15	WBGene00022492	chrIII	chrIII:1194400-1196286	217.324	66.0236	-1.71879	0.0106365	yes
dyf-8	C43C3.3	WBGene00001123	chrX	chrX:9698619-9701620	5.22262	0.0267613	-7.60848	0.0237436	yes
dyn-1	C02C6.1	WBGene00001130	chrX	chrX:15568847-15573625	11.3512	38.261	1.75302	0.0043008	yes
ech-2	F38H4.8	WBGene00001151	chrIV	chrIV:11854955-11856353	86.6284	26.9222	-1.68604	0.0119328	yes
edc-3	R05D11.8	WBGene00011036	chrI	chrI:8602118-8605157	154.965	55.8133	-1.47327	0.0018175	yes
eel-1	Y67D8C.5	WBGene00022069	chrIV	chrIV:3032730-3049969	46.2627	113.24	1.29146	0.00480764	yes
efk-1	F42A10.4	WBGene00001160	chrIII	chrIII:6164594-6172750	52.0709	171.693	1.72129	0.000306205	yes
egg-3	F44F4.2	WBGene00009701	chrII	chrII:10882347-10884402	75.9591	21.9739	-1.78943	0.00165322	yes
egl-46	K11G9.4	WBGene00001210	chrV	chrV:6679129-6681558	17.233	1.61904	-3.41197	0.0054689	yes
ekl-5	Y26E6A.1	WBGene00012512	chrX	chrX:13914799-13917101	33.5037	7.80236	-2.10234	0.0063464	yes
emb-8	K10D2.6	WBGene00001262	chrIII	chrIII:5188697-5199640	119.547	23.448	-2.35004	0.0166547	yes
eor-1	R11E3.6	WBGene00001324	chrIV	chrIV:4793193-4799348	127.451	62.0304	-1.03889	0.0436301	yes
epi-1	K08C7.3	WBGene00001328	chrIV	chrIV:10666806-10679269	9.04036	1.86611	-2.27634	0.00125641	yes
ers-1	Y41E3.4	WBGene00001336	chrIV	chrIV:15008472-15013151	95.8403	326.094	1.76658	2.74e-05	yes
ers-2	ZC434.5	WBGene00001337	chrI	chrI:10336385-10340864	91.9301	211.42	1.20151	0.00943542	yes
eya-1	C49A1.4	WBGene00001377	chrI	chrI:14220770-14231331	9.95788	0	-1.79769e+308	0.0211666	yes
fasn-1	F32H2.5	WBGene00009342	chrI	chrI:8975372-8986515	10.3092	1.20824	-3.09296	2.03e-05	yes
fat-1	Y67H2A.8	WBGene00001393	chrIV	chrIV:13315617-13318759	112.39	242.773	1.11109	0.0264991	yes
fat-4	T13F2.1	WBGene00001396	chrIV	chrIV:9799407-9802199	28.853	9.07042	-1.66948	0.048722	yes
fat-6	VZK822L.1	WBGene00001398	chrIV	chrIV:11913667-11915773	0.231544	11.9544	5.69011	0.0337422	yes
fbxa-106	Y59A8B.11	WBGene00013348	chrV	chrV:18082406-18083417	16.8961	116.593	2.78673	2.62e-05	yes
fbxa-107	Y37H2A.4	WBGene00012564	chrV	chrV:18123948-18125138	41.9129	119.965	1.51715	0.0125126	yes
fbxa-118	M162.8	WBGene00010934	chrV	chrV:19776049-19777144	8.21516	53.9792	2.71604	0.00299908	yes
fbxa-125	B0511.3	WBGene00015229	chrI	chrI:10646750-10647766	9.71362	43.4795	2.16225	0.0338193	yes
fbxa-13	Y22D7AR.11	WBGene00021264	chrIII	chrIII:1703537-1705477	33.1827	89.1819	1.42632	0.0476363	yes
fbxa-140	C47B2.1	WBGene00008130	chrI	chrI:12960360-12964568	11.9685	53.1309	2.15031	0.037072	yes
fbxa-153	B0391.5	WBGene00007162	chrV	chrV:15605710-15610361	2.57008	19.706	2.93875	0.0365259	yes
fbxa-203	W05F2.5	WBGene00021037	chrI	chrI:3371770-3373834	23.7668	75.3003	1.66371	0.0173051	yes
fbxa-215	Y45F10C.3	WBGene00012879	chrIV	chrIV:13665344-13666845	219.858	24.5487	-3.16285	1.52e-09	yes
fbxa-3	T08E11.7	WBGene00020363	chrII	chrII:1818963-1820008	9.14568	57.6633	2.65649	0.0038225	yes
fbxa-90	Y102A5C.19	WBGene00013623	chrV	chrV:16966861-16968561	11.8036	55.9508	2.24493	0.00687458	yes
fbxa-94	F28F8.8	WBGene00009225	chrV	chrV:15572914-15574087	17.3365	106.022	2.61248	5.53e-05	yes
fbxa-95	F28F8.4	WBGene00009222	chrV	chrV:15571469-15572650	38.4454	139.157	1.85583	0.00256581	yes
fbxb-37	T16A1.8	WBGene00020537	chrII	chrII:2091747-2093854	11.2002	0.705913	-3.98789	0.0355524	yes
fbxb-40	M01D1.9	WBGene00019704	chrII	chrII:1048917-1049910	11.2612	0	-1.79769e+308	0.0292561	yes
fbxb-45	M01D1.10	WBGene00019705	chrII	chrII:1042975-1044032	11.1344	0.449593	-4.63026	0.0369141	yes
fbxb-66	Y40B1B.3	WBGene00044066	chrI	chrI:13424019-13425133	42.3996	1.95971	-4.43534	0.000125938	yes
fbxb-7	Y20C6A.2	WBGene00012492	chrV	chrV:17377396-17379201	66.3566	14.6154	-2.18275	0.00311905	yes
fbxc-25	K09F6.8	WBGene00019591	chrII	chrII:2294697-2296108	12.8803	0.322912	-5.31788	0.00489769	yes
fbxc-34	R07C3.5	WBGene00019921	chrII	chrII:931190-932334	12.1544	0.498948	-4.60645	0.0379634	yes
fbxc-43	C16A11.9	WBGene00045297	chrII	chrII:4234952-4235985	8.94511	45.7273	2.35388	0.0213295	yes
fbxc-51	Y46B2A.1	WBGene00021576	chrII	chrII:868820-871696	18.4818	4.20143	-2.13715	0.0320558	yes
fcp-1	F36F2.6	WBGene00009479	chrI	chrI:9004506-9008701	70.0022	24.8527	-1.494	0.0085314	yes
fer-1	F43G9.6	WBGene00001414	chrI	chrI:8623010-8631178	1.59133	9.01108	2.50147	0.00423913	yes
T04A11.3	T04A11.3	WBGene00011418	chrIV	chrIV:12478987-12482403	5.54715	0.437974	-3.66283	0.00829153	yes
fkb-7	B0511.1	WBGene00001432	chrI	chrI:10667943-10670959	37.1912	4.074	-3.19044	0.0029093	yes
flt-1	ZK783.4	WBGene00001470	chrIII	chrIII:7650501-7655967	19.0948	3.24076	-2.55877	0.000157871	yes
frm-4	C24A11.8	WBGene00001491	chrI	chrI:5402897-5408347	120.44	265.208	1.13881	0.0211666	yes
fum-1	H14A12.2	WBGene00001503	chrIII	chrIII:7465539-7468024	852.692	266.203	-1.6795	9.17e-05	yes
fzo-1	ZK1248.14	WBGene00001509	chrII	chrII:5833306-5836182	45.4249	115.434	1.34551	0.0055675	yes
gad-1	T05H4.14	WBGene00001513	chrV	chrV:6431313-6433479	88.7681	35.4855	-1.32281	0.0177894	yes
gbh-1	D2089.5	WBGene00001522	chrII	chrII:10690396-10693752	7.46482	43.5542	2.54463	0.00223918	yes
gei-8	C14B9.6	WBGene00001565	chrIII	chrIII:8108723-8125409	4.01434	28.2962	2.81737	5.96e-07	yes
gex-3	F28D1.10	WBGene00001580	chrIV	chrIV:12404406-12408664	102.712	39.5551	-1.37667	0.00373739	yes
gfi-3	M163.4	WBGene00001583	chrX	chrX:14480501-14484586	20.8007	54.5763	1.39164	0.0124872	yes
git-1	F14F3.2	WBGene00008805	chrX	chrX:10524835-10529164	3.25568	14.1744	2.12226	0.0361837	yes
glb-1	ZK637.13	WBGene00014030	chrIII	chrIII:8922320-8923220	3.80281	71.9391	4.24164	0.00312623	yes
gld-1	T23G11.3	WBGene00001595	chrI	chrI:7695676-7698219	48.9216	6.52914	-2.90551	5.09e-06	yes
glh-2	C55B7.1	WBGene00001599	chrI	chrI:6514021-6517508	151.23	413.184	1.45004	0.00131945	yes
glh-3	B0414.6	WBGene00001600	chrI	chrI:5792326-5795117	26.5192	82.5655	1.6385	0.000990665	yes
glh-4	T12F5.3	WBGene00001601	chrI	chrI:3726013-3731221	63.9929	138.491	1.11381	0.0202186	yes
glp-1	F02A9.6	WBGene00001609	chrIII	chrIII:9092163-9099606	61.7211	121.959	0.98256	0.0488047	yes
glr-1	C06E1.4	WBGene00001612	chrIII	chrIII:8584075-8588619	1.97107	0.0869315	-4.50295	0.0487187	yes
gly-13	B0416.6	WBGene00001638	chrX	chrX:9293615-9296563	57.8041	20.1209	-1.52248	0.0173708	yes
gly-5	Y39E4B.12	WBGene00001630	chrIII	chrIII:13187290-13204793	51.3184	13.7501	-1.90004	0.00305842	yes
R04B3.2	R04B3.2	WBGene00019867	chrX	chrX:2471531-2473666	28.046	6.74782	-2.0553	0.0331148	yes
gna-2	T23G11.2	WBGene00001647	chrI	chrI:7699540-7700958	77.3317	25.1137	-1.62259	0.0130499	yes
gpd-2	K10B3.8	WBGene00001684	chrX	chrX:3113423-3116586	10.2974	43.824	2.08944	0.00583742	yes
gpi-1	Y87G2A.8	WBGene00013597	chrI	chrI:13576236-13581573	1465.61	174.794	-3.06778	2.37e-13	yes
gsa-1	R06A10.2	WBGene00001745	chrI	chrI:1068593-1075013	14.5911	2.29585	-2.66799	0.00623354	yes
gska-3	C36B1.10	WBGene00007977	chrI	chrI:8749659-8751363	10.6222	56.091	2.40069	0.00116559	yes
gst-12	F37B1.2	WBGene00001760	chrII	chrII:13616691-13617840	32.9804	4.84944	-2.76572	0.0392597	yes
gst-16	F37B1.5	WBGene00001764	chrII	chrII:13622962-13624363	40.3563	7.5213	-2.42374	0.0444024	yes
gst-20	Y48E1B.10	WBGene00001768	chrII	chrII:13608120-13609710	28.7296	2.49058	-3.52798	0.0143097	yes
gst-38	F35E8.8	WBGene00001786	chrV	chrV:15915230-15916060	2.49616	43.6509	4.12823	0.00664971	yes
gst-44	F13A7.10	WBGene00001792	chrV	chrV:16390913-16392386	45.7532	0.0339028	-10.3983	0.00182491	yes
ham-1	F53B2.6	WBGene00001820	chrIV	chrIV:12542010-12545701	51.825	14.105	-1.87744	0.00453219	yes
hcf-1	C46A5.9	WBGene00001827	chrIV	chrIV:7770742-7774258	72.8737	30.9034	-1.23763	0.0219876	yes
hch-1	F40E10.1	WBGene00001828	chrX	chrX:14696341-14699907	19.7477	0.110006	-7.48796	0.000654825	yes
hcp-2	T06E4.1	WBGene00001830	chrV	chrV:9645815-9650273	214.42	108.039	-0.988884	0.0422218	yes
hda-4	C10E2.3	WBGene00001837	chrX	chrX:16729485-16744625	0.970278	5.80173	2.58001	0.0462053	yes
hil-2	Y73B6BL.9	WBGene00001853	chrIV	chrIV:6294114-6295199	3440.31	228.677	-3.91115	0	yes
hil-3	F22F1.1	WBGene00001854	chrX	chrX:8159104-8160035	270.884	30.4054	-3.15527	2.1e-08	yes
hil-4	C18G1.5	WBGene00001855	chrV	chrV:4754298-4755455	4138.59	1638.91	-1.3364	0.00453219	yes
hil-5	B0414.3	WBGene00001856	chrI	chrI:5774587-5775613	3863.31	788.325	-2.29297	1.17e-08	yes
his-24	M163.3	WBGene00001898	chrX	chrX:14490036-14491041	571.948	28.3006	-4.33698	0	yes
his-46	B0035.9	WBGene00001920	chrIV	chrIV:11338499-11338811	238.738	952.819	1.99677	0.00038249	yes
his-56	F54E12.3	WBGene00001930	chrIV	chrIV:11325995-11326307	239.714	947.211	1.98237	0.000431547	yes
his-60	F55G1.11	WBGene00001934	chrIV	chrIV:7487555-7487986	93.7248	427.02	2.1878	0.000167597	yes
his-64	F22B3.1	WBGene00001938	chrIV	chrIV:11407093-11407474	159.767	536.987	1.74892	0.00261456	yes
his-68	T23D8.6	WBGene00001942	chrI	chrI:9989090-9989605	178.451	52.6042	-1.76227	0.0141376	yes
his-72	Y49E10.6	WBGene00001946	chrIII	chrIII:12367373-12368065	198.434	66.07	-1.58659	0.0111378	yes
hlh-14	C18A3.8	WBGene00001958	chrII	chrII:5737769-5739772	15.5802	1.1983	-3.70065	0.0238982	yes
hmg-12	Y17G7A.1	WBGene00001977	chrII	chrII:11916447-11935280	351.931	126.342	-1.47796	0.0029093	yes
hsp-12.3	F38E11.1	WBGene00002012	chrIV	chrIV:9444880-9445262	36.3833	833.459	4.51776	2.19e-07	yes
hsp-12.6	F38E11.2	WBGene00002013	chrIV	chrIV:9446367-9446867	3.15489	86.8816	4.78339	0.0363999	yes
hsp-16.1	T27E4.8	WBGene00002015	chrV	chrV:9090075-9090633	2645.41	931.462	-1.50592	0.0158185	yes
hsp-16.2	Y46H3A.3	WBGene00002016	chrV	chrV:1804439-1804970	1474.72	344.892	-2.09622	7.61e-06	yes
hsp-16.41	Y46H3A.2	WBGene00002018	chrV	chrV:1805231-1805874	2741.31	543.62	-2.33419	5.3e-08	yes
hsp-16.48	T27E4.3	WBGene00002019	chrV	chrV:9089257-9089744	12527.3	3492.36	-1.8428	3.94e-05	yes
hsp-4	F43E2.8	WBGene00002008	chrII	chrII:7350077-7352593	300.139	107.227	-1.48497	0.000711802	yes
hsp-70	C12C8.1	WBGene00002026	chrI	chrI:9317727-9327204	384.391	115.781	-1.73118	9.23e-05	yes
htz-1	R08C7.3	WBGene00019947	chrIV	chrIV:4445994-4446990	690.772	261.569	-1.40102	0.00166778	yes
ife-5	Y57A10A.30	WBGene00002063	chrII	chrII:12280597-12284055	149.709	525.969	1.81282	6.11e-05	yes
ift-74	C18H9.8	WBGene00016005	chrII	chrII:6679510-6682937	4.13516	16.3249	1.98106	0.0302539	yes
ify-1	C27A2.3	WBGene00002068	chrII	chrII:5054068-5055327	1267.64	377.641	-1.74706	2.71e-05	yes
igcm-1	F39H12.4	WBGene00018215	chrX	chrX:845728-851506	2.29716	0	-1.79769e+308	0.0449579	yes
igcm-3	T02C5.3	WBGene00020160	chrX	chrX:2694900-2705859	33.2884	6.73347	-2.3056	0.0019733	yes
ile-1	K07A1.8	WBGene00002070	chrI	chrI:9606253-9611590	231.252	52.1022	-2.15005	2.37e-06	yes
imp-1	C36B1.12	WBGene00007979	chrI	chrI:8752229-8755672	122.393	38.9564	-1.65159	0.00661539	yes
inf-1	F57B9.6	WBGene00002083	chrIII	chrIII:6929983-6931898	266.751	84.9041	-1.65159	0.000441498	yes
inft-2	F15B9.4	WBGene00008848	chrV	chrV:13002326-13008910	24.683	74.0915	1.58579	0.00288955	yes
ins-5	ZK84.3	WBGene00002088	chrII	chrII:5998457-5998826	79.7854	1.48668	-5.74595	0.0253956	yes
inx-21	Y47G6A.1	WBGene00002143	chrI	chrI:3611911-3618317	29.6929	74.9666	1.33613	0.0222672	yes
inx-7	K02B2.4	WBGene00002129	chrIV	chrIV:5941913-5946667	132.335	57.7285	-1.19684	0.0476363	yes
irs-1	R11A8.6	WBGene00002152	chrIV	chrIV:10368585-10374572	49.2857	235.996	2.25952	3.7e-08	yes
jac-1	Y105C5B.21	WBGene00002175	chrIV	chrIV:15997825-16026815	4.34245	0.485646	-3.16053	0.0146564	yes
kcc-1	R13A1.2	WBGene00006504	chrIV	chrIV:7213705-7217982	11.5913	1.57458	-2.88	0.000934574	yes
klp-10	C33H5.4	WBGene00002221	chrIV	chrIV:7797108-7800426	9.08908	30.783	1.75993	0.00555148	yes
klp-18	C06G3.2	WBGene00002228	chrIV	chrIV:7040199-7043683	64.6473	167.601	1.37437	0.00226422	yes
klp-8	C15C7.2	WBGene00002220	chrX	chrX:3159929-3164414	17.7104	56.3946	1.67096	0.00360683	yes
lag-1	K08B4.1	WBGene00002245	chrIV	chrIV:6095399-6110628	45.5071	116.706	1.35872	0.00687458	yes
lam-3	T22A3.8	WBGene00002248	chrI	chrI:10608454-10621417	6.14618	0.652928	-3.23469	9.7e-05	yes
lbp-1	F40F4.3	WBGene00002253	chrX	chrX:3259089-3259843	378.084	61.9874	-2.60866	4.55e-06	yes
lea-1	K08H10.1	WBGene00002263	chrV	chrV:10020518-10031069	74.5331	332.074	2.15555	8.81e-07	yes
lec-4	C44F1.3	WBGene00002267	chrIII	chrIII:3771402-3773315	16.3856	1054.09	6.00742	0	yes
let-2	F01G12.5	WBGene00002280	chrX	chrX:16380527-16389419	73.0298	21.9273	-1.73576	0.0154502	yes
let-363	B0261.2	WBGene00002583	chrI	chrI:5245745-5263427	31.9765	67.5131	1.07816	0.030001	yes
lfi-1	ZC8.4	WBGene00022500	chrX	chrX:4972569-4997567	1.12263	36.181	5.01028	0.016925	yes
lgg-3	B0336.8	WBGene00002982	chrIII	chrIII:5697503-5697964	192.615	37.0684	-2.37746	0.0124511	yes
lim-4	ZC64.4	WBGene00002987	chrX	chrX:3869733-3873276	9.51832	0.185754	-5.67924	0.0448407	yes
lim-7	C04F1.3	WBGene00002989	chrI	chrI:5716678-5725359	15.1599	1.38497	-3.45232	0.0174682	yes
lin-13	C03B8.4	WBGene00003002	chrIII	chrIII:7694624-7709407	45.6176	93.6916	1.03833	0.037814	yes
lin-15B	ZK662.4	WBGene00023497	chrX	chrX:15726060-15731788	24.0326	55.6351	1.21101	0.0167988	yes
lin-25	F56H9.5	WBGene00003011	chrV	chrV:12649907-12659670	35.9391	9.9562	-1.85189	0.0229714	yes
lin-41	C12C8.3	WBGene00003026	chrI	chrI:9335956-9342488	21.8701	69.0099	1.65785	0.000430617	yes
lin-45	Y73B6A.5	WBGene00003030	chrIV	chrIV:6742527-6748413	110.207	33.0116	-1.73917	0.000635765	yes
lin-49	F42A9.2	WBGene00003034	chrIV	chrIV:8620669-8626136	36.0543	80.0628	1.15096	0.0211596	yes
lnp-1	C05E11.1	WBGene00015492	chrX	chrX:4588740-4590419	24.4734	68.9635	1.49462	0.0216728	yes
lpd-7	R13A5.12	WBGene00003063	chrIII	chrIII:7573280-7575198	160.496	447.677	1.47992	0.000765149	yes
lpr-3	W04G3.8	WBGene00012261	chrX	chrX:11057369-11059728	31.1212	3.08446	-3.33481	0.000417058	yes
lrs-1	R74.1	WBGene00003073	chrIII	chrIII:4181516-4186797	92.6959	341.967	1.88328	6.12e-06	yes
lsd-1	T08D10.2	WBGene00011615	chrX	chrX:11948783-11951825	17.8529	44.1613	1.30663	0.0323301	yes
lst-1	T22A3.3	WBGene00003083	chrI	chrI:10588165-10590436	267.464	1119.15	2.06498	4.14e-05	yes
lst-2	R160.7	WBGene00003084	chrX	chrX:4378004-4383341	1.13607	8.55657	2.91298	0.0275808	yes
mag-1	R09B3.5	WBGene00003123	chrI	chrI:11911314-11912668	273.114	81.4688	-1.74518	0.00604268	yes
mat-2	W10C6.1	WBGene00003133	chrII	chrII:11113275-11120730	63.4301	142.558	1.16831	0.012306	yes
mbk-1	T04C10.1	WBGene00003149	chrX	chrX:14819842-14824471	16.8028	48.6471	1.53365	0.0055278	yes
mcm-4	Y39G10AR.14	WBGene00003156	chrI	chrI:2318293-2321849	86.4409	213.92	1.30728	0.00417732	yes
mec-12	C44B11.3	WBGene00003175	chrIII	chrIII:3131567-3139213	16.8194	0.666528	-4.65732	0.000904558	yes
meg-1	K02B9.1	WBGene00010492	chrX	chrX:13926973-13929563	40.9005	4.92408	-3.05419	1.23e-05	yes
meg-2	K02B9.2	WBGene00010493	chrX	chrX:13923003-13926051	15.7529	3.06602	-2.36118	0.0113651	yes
mei-1	T01G9.5	WBGene00003183	chrI	chrI:8294871-8296906	56.2479	17.4966	-1.68472	0.0443764	yes
mes-1	F54F7.5	WBGene00003219	chrX	chrX:11857425-11862305	1.11852	18.2132	4.02532	9.17e-05	yes
mes-2	R06A4.7	WBGene00003220	chrII	chrII:14383899-14388375	29.6276	68.1531	1.20184	0.0306395	yes
mes-3	F54C1.3	WBGene00003221	chrI	chrI:4996841-5003161	18.7271	60.9038	1.7014	0.000904899	yes
mex-1	W03C9.7	WBGene00003228	chrII	chrII:11968572-11973627	104.349	34.0709	-1.6148	0.00206744	yes
mex-5	W02A2.7	WBGene00003230	chrIV	chrIV:13353698-13356080	328.905	61.7339	-2.41354	8.9e-09	yes
mex-6	AH6.5	WBGene00003231	chrII	chrII:9524114-9526307	223.994	20.6581	-3.43868	6.16e-13	yes
mig-1	Y34D9B.1	WBGene00003238	chrI	chrI:948576-957376	23.9437	4.29367	-2.47936	0.044455	yes
mlt-11	W01F3.3	WBGene00012186	chrV	chrV:20667179-20678478	2.49315	0.0945379	-4.72093	0.0126721	yes
mnp-1	B0285.7	WBGene00007139	chrIII	chrIII:4356510-4364944	33.5893	10.1158	-1.73139	0.013039	yes
mom-2	F38E1.7	WBGene00003395	chrV	chrV:8355967-8358165	398.168	86.858	-2.19665	3.7e-07	yes
mpk-1	F43C1.2	WBGene00003401	chrIII	chrIII:4216742-4228067	29.7056	9.15853	-1.69755	0.0388067	yes
mrp-4	F21G4.2	WBGene00003410	chrX	chrX:9884264-9892270	3.16747	30.1018	3.24845	2.6e-08	yes
mrs-1	F58B3.5	WBGene00003415	chrIV	chrIV:11631919-11635464	41.3771	97.5476	1.23728	0.0126745	yes
msi-1	R10E9.1	WBGene00003423	chrIII	chrIII:3964636-3976377	8.59797	27.6804	1.6868	0.0156927	yes
mtx-1	F39B2.11	WBGene00009559	chrI	chrI:14755143-14756415	677.231	197.57	-1.77728	2.79e-05	yes
mua-3	K08E5.3	WBGene00003482	chrIII	chrIII:10160605-10183438	3.13341	0.561134	-2.48132	0.00716314	yes
mup-4	K07D8.1	WBGene00003497	chrIII	chrIII:7479618-7489010	1.5328	5.85419	1.93331	0.0233772	yes
mus-101	F37D6.1	WBGene00009507	chrI	chrI:10479291-10484960	27.7257	78.3317	1.49837	0.00136143	yes
mut-7	ZK1098.8	WBGene00003504	chrIII	chrIII:9538946-9542271	25.4782	57.9599	1.18579	0.0317661	yes
ncam-1	F02G3.1	WBGene00017184	chrX	chrX:692976-703038	43.3035	2.05924	-4.3943	4.72e-07	yes
ncbp-1	F37E3.1	WBGene00018156	chrI	chrI:6422010-6428944	366.548	104.776	-1.80669	2.39e-05	yes
ncbp-2	F26A3.2	WBGene00009141	chrI	chrI:7642585-7643264	225.286	49.1092	-2.19769	0.00175227	yes
ned-8	F45H11.2	WBGene00003587	chrI	chrI:10373360-10373850	129.483	29.6344	-2.12742	0.027701	yes
nft-1	Y56A3A.13	WBGene00003594	chrIII	chrIII:11923783-11929279	54.6897	124.22	1.18355	0.0352495	yes
ngp-1	T19A6.2	WBGene00003596	chrI	chrI:8394721-8398615	77.5578	272.465	1.81272	2.79e-05	yes
nhr-111	F44G3.9	WBGene00003701	chrV	chrV:16123034-16124761	8.72742	0.0350198	-7.96124	0.00243158	yes
nhr-133	F44C8.8	WBGene00003723	chrV	chrV:2210515-2212101	31.236	6.83686	-2.1918	0.016631	yes
nhr-206	R07B7.13	WBGene00011097	chrV	chrV:12092025-12093842	4.14405	22.9893	2.47185	0.02215	yes
nhr-207	R07B7.14	WBGene00011098	chrV	chrV:12096214-12097826	1.11338	15.6142	3.80984	0.0448407	yes
nhr-47	C24G6.4	WBGene00003637	chrV	chrV:5505279-5513814	70.9477	29.3005	-1.27583	0.0444024	yes
nhr-57	T05B4.2	WBGene00003647	chrV	chrV:4131909-4134930	19.3232	64.6527	1.74238	0.00583257	yes
nhr-71	K11E4.5	WBGene00003661	chrX	chrX:13747246-13751727	20.5601	1.04162	-4.30294	0.000506683	yes
nhx-5	F57C7.2	WBGene00003733	chrX	chrX:10576897-10580992	2.28111	13.4141	2.55594	0.0429562	yes
nid-1	F54F3.1	WBGene00003738	chrV	chrV:12910096-12917174	14.1604	0.925182	-3.93599	9.97e-05	yes
nipi-3	K09A9.1	WBGene00010700	chrX	chrX:15607900-15611743	14.0936	35.5936	1.33658	0.0187842	yes
noah-1	C34G6.6	WBGene00016422	chrI	chrI:5874424-5878957	12.0291	0.559545	-4.42613	0.000765668	yes
noah-2	F52B11.3	WBGene00009926	chrIV	chrIV:14091228-14096598	10.1715	0.156438	-6.0228	0.00135939	yes
nol-9	K09B11.2	WBGene00010709	chrIV	chrIV:13422475-13429322	29.2986	79.855	1.44655	0.00955179	yes
npp-1	K07F5.13	WBGene00003787	chrIV	chrIV:9858465-9862087	159.695	70.8625	-1.17222	0.0428051	yes
npp-15	C29E4.4	WBGene00003801	chrIII	chrIII:7928983-7932928	62.1005	136.099	1.13198	0.0177005	yes
npp-16	Y56A3A.17	WBGene00003802	chrIII	chrIII:11915790-11918621	740.151	355.333	-1.05865	0.0201211	yes
npp-17	F10G8.3	WBGene00003803	chrI	chrI:10026630-10030048	152.712	64.3171	-1.24754	0.0228957	yes
npp-9	F59A2.1	WBGene00003795	chrIII	chrIII:3400629-3404468	518.081	227.444	-1.18766	0.0204303	yes
ntl-4	C49H3.5	WBGene00003827	chrIV	chrIV:7910587-7915161	27.1135	7.10782	-1.93153	0.00754166	yes
numr-1	F08F8.5	WBGene00017270	chrIII	chrIII:7364319-7366342	31.2574	6.17438	-2.33983	0.0423626	yes
nurf-1	F26H11.2	WBGene00009180	chrII	chrII:14390324-14407829	1054.68	352.472	-1.58122	0.00206744	yes
nxf-2	C15H11.6	WBGene00003835	chrV	chrV:14415798-14417814	208.064	95.5042	-1.12339	0.0330494	yes
nxt-1	Y71F9AM.5	WBGene00003836	chrI	chrI:2929778-2931363	805.144	253.126	-1.66939	0.000226559	yes
obr-2	F14H8.1	WBGene00008832	chrV	chrV:15011859-15014205	7.38482	35.2336	2.25432	0.0137037	yes
odc-1	K11C4.4	WBGene00003844	chrV	chrV:6898522-6900205	34.9872	6.80012	-2.3632	0.00255359	yes
oma-1	C09G9.6	WBGene00003864	chrIV	chrIV:8888959-8890987	233.302	41.0553	-2.50656	2.75e-08	yes
ost-1	C44B12.2	WBGene00003893	chrIV	chrIV:1107395-1110860	98.7446	31.7379	-1.63749	0.0290851	yes
pak-1	C09B8.7	WBGene00003911	chrX	chrX:6044273-6048575	8.22997	33.7658	2.0366	0.0054689	yes
par-2	F58B6.3	WBGene00003917	chrIII	chrIII:1081392-1095063	18.7904	51.5634	1.45635	0.0397461	yes
pas-1	C15H11.7	WBGene00003922	chrV	chrV:14421567-14422605	277.833	112.871	-1.29955	0.0132394	yes
pat-10	F54C1.7	WBGene00003934	chrI	chrI:5018769-5020166	461.479	191.713	-1.26731	0.0370263	yes
pbs-5	K05C4.1	WBGene00003951	chrI	chrI:14719155-14720468	167.92	69.781	-1.26686	0.0271759	yes
pbs-7	F39H11.5	WBGene00003953	chrI	chrI:8695196-8696370	288.898	68.7308	-2.07153	3.02e-05	yes
pcm-1	C10F3.5	WBGene00003954	chrV	chrV:5960567-5969137	98.6969	360.046	1.86711	0.000160092	yes
pdcd-2	R07E5.10	WBGene00011116	chrIII	chrIII:4415493-4418036	99.5676	234.815	1.23777	0.0167955	yes
pdi-2	C07A12.4	WBGene00003963	chrX	chrX:4524158-4526507	1876.39	488.673	-1.94102	1.84e-05	yes
pdi-3	H06O01.1	WBGene00003964	chrI	chrI:7015906-7020799	457.583	190.269	-1.26599	0.00529195	yes
pdk-1	H42K12.1	WBGene00003965	chrX	chrX:1321347-1327980	34.108	9.58651	-1.83103	0.0137828	yes
pfd-4	B0035.4	WBGene00007107	chrIV	chrIV:11315182-11315855	158.831	32.348	-2.29574	0.00240644	yes
pgl-2	B0523.3	WBGene00003993	chrIII	chrIII:8670467-8674970	39.8012	97.8965	1.29844	0.019731	yes
pgp-10	C54D1.1	WBGene00004004	chrX	chrX:7158992-7170585	0.154398	6.27856	5.3457	0.0380752	yes
R05F9.6	R05F9.6	WBGene00019890	chrII	chrII:4889431-4891424	16.3482	42.6451	1.38324	0.0393222	yes
pme-3	F20C5.1	WBGene00004051	chrIV	chrIV:8746240-8752663	32.7306	75.1261	1.19867	0.0429813	yes
pmk-2	F42G8.3	WBGene00004056	chrIV	chrIV:8143485-8148626	6.96511	31.6612	2.1845	0.0218187	yes
pmt-2	F54D11.1	WBGene00018811	chrV	chrV:4628565-4635251	14.0817	2.7335	-2.365	0.0379778	yes
pod-2	W09B6.1	WBGene00004076	chrII	chrII:1143914-1152706	18.0493	70.3072	1.96173	5.26e-05	yes
pos-1	F52E1.1	WBGene00004078	chrV	chrV:8414064-8415235	222.814	52.4387	-2.08713	3.08e-05	yes
pptr-2	C13G3.3	WBGene00007554	chrV	chrV:11027494-11030827	244.548	77.2297	-1.66289	0.00023813	yes
pqn-27	E01G4.4	WBGene00004116	chrII	chrII:13448781-13460572	32.1117	10.1523	-1.66129	0.0169752	yes
pqn-44	F55A12.9	WBGene00004131	chrI	chrI:5372857-5384511	93.9143	252.879	1.42903	0.0107027	yes
pqn-45	F56F3.1	WBGene00004132	chrIII	chrIII:4471377-4475112	86.8775	16.541	-2.39294	1.16e-06	yes
pqn-46	F57B9.9	WBGene00004133	chrIII	chrIII:6941833-6944683	2.6578	49.3398	4.21445	0.000168578	yes
prg-2	C01G5.2	WBGene00004179	chrIV	chrIV:6526717-6529791	36.7412	136.627	1.89477	2.07e-05	yes
prmt-5	C34E10.5	WBGene00016408	chrIII	chrIII:5230530-5234459	60.197	124.351	1.04665	0.0421228	yes
prom-1	F26H9.1	WBGene00009173	chrI	chrI:9287438-9289757	37.9126	6.03104	-2.6522	0.000304363	yes
prx-14	R07H5.1	WBGene00004199	chrIV	chrIV:11183116-11184073	94.8096	19.8348	-2.257	0.00155655	yes
prx-6	F39G3.7	WBGene00004195	chrV	chrV:4715389-4720095	21.8384	3.55346	-2.61957	0.00184641	yes
puf-12	ZK945.3	WBGene00014165	chrII	chrII:10100250-10102996	220.679	453.097	1.03787	0.0377556	yes
puf-5	F54C9.8	WBGene00004241	chrII	chrII:8575489-8577671	257.835	21.694	-3.57108	0	yes
puf-6	F18A11.1	WBGene00004242	chrII	chrII:13039342-13043406	96.9381	22.5503	-2.10392	2.79e-05	yes
puf-7	B0273.2	WBGene00004243	chrIV	chrIV:5486675-5490322	168.467	34.7316	-2.27815	1.34e-06	yes
pyr-1	D2085.1	WBGene00004259	chrII	chrII:8651083-8658758	7.9653	51.7375	2.69941	1.93e-09	yes
pzf-1	T05G11.1	WBGene00011505	chrV	chrV:15926652-15928352	44.7475	0.570781	-6.29272	1.06e-05	yes
rab-8	D1037.4	WBGene00004272	chrI	chrI:3682875-3684121	347.915	137.482	-1.33949	0.00571225	yes
rack-1	K04D7.1	WBGene00010556	chrIV	chrIV:10176656-10177834	280.355	875.526	1.64289	0.000111639	yes
rad-26	C27B7.4	WBGene00007761	chrIV	chrIV:8894092-8901372	49.0004	111.849	1.19069	0.0113675	yes
ran-1	K01G5.4	WBGene00004302	chrIII	chrIII:10742710-10747631	626.701	281.207	-1.15615	0.0445169	yes
ran-2	C29E4.3	WBGene00004303	chrIII	chrIII:7933559-7937638	47.921	102.564	1.09779	0.0477268	yes
rbc-1	F54E4.1	WBGene00004313	chrX	chrX:14610805-14624780	7.393	17.8888	1.27482	0.0400487	yes
rbg-1	F20D1.6	WBGene00004317	chrX	chrX:14983454-14987285	260.728	66.9197	-1.96204	1.06e-05	yes
rbg-3	B0393.2	WBGene00007167	chrIII	chrIII:4754396-4756978	170.73	59.7867	-1.51382	0.00127803	yes
ref-1	T01E8.2	WBGene00004334	chrII	chrII:10218410-10219965	5.65153	30.527	2.43337	0.00711281	yes
rer-1	F46C5.8	WBGene00009783	chrII	chrII:8811296-8812549	121.626	48.6999	-1.32047	0.0411117	yes
ret-1	W06A7.3	WBGene00004336	chrV	chrV:14824648-14847297	399.3	96.1837	-2.05361	0.000210936	yes
rga-3	K09H11.3	WBGene00019600	chrV	chrV:5717888-5722064	15.7039	5.41378	-1.53641	0.042143	yes
rgs-10	F45B8.2	WBGene00004353	chrX	chrX:14962851-14963925	304.999	58.0256	-2.39405	4.78e-06	yes
rgs-11	F45B8.1	WBGene00004354	chrX	chrX:14964512-14965863	295.283	47.5723	-2.63391	8.07e-07	yes
rgs-7	F56B6.2	WBGene00004350	chrX	chrX:3542544-3557582	73.5962	8.86302	-3.05376	0.0164788	yes
rgs-9	ZC53.7	WBGene00004352	chrX	chrX:1915258-1917071	32.5314	1.48148	-4.45672	0.00183606	yes
rhr-1	F08F3.3	WBGene00004358	chrV	chrV:5428143-5430415	20.5453	3.52923	-2.54138	0.0151338	yes
ril-2	C14C10.3	WBGene00007586	chrV	chrV:12596372-12599135	67.6738	152.983	1.1767	0.0182857	yes
rla-1	Y37E3.7	WBGene00004409	chrI	chrI:2069088-2069590	843.216	1688.32	1.00162	0.0456206	yes
rmd-1	T05G5.7	WBGene00011501	chrIII	chrIII:9757447-9762058	159.461	11.1138	-3.84278	0.0342741	yes
rnp-2	K08D10.4	WBGene00004385	chrIV	chrIV:4172094-4173981	108.987	27.8987	-1.96589	0.00709839	yes
rnp-5	K02F3.11	WBGene00004388	chrIII	chrIII:852791-853899	104.154	41.1252	-1.34063	0.0389233	yes
rpa-0	F25H2.10	WBGene00004408	chrI	chrI:10567880-10569008	417.762	1191.95	1.51258	0.000451097	yes
rpb-3	C36B1.3	WBGene00007971	chrI	chrI:8728762-8729958	455.052	127.41	-1.83655	9.31e-05	yes
rpb-5	H27M09.2	WBGene00019246	chrI	chrI:6850418-6851211	116.641	42.7374	-1.4485	0.0481964	yes
rpl-1	Y71F9AL.13	WBGene00004412	chrI	chrI:2875396-2876314	416.38	1434.24	1.78432	0.000441955	yes
rpl-10	F10B5.1	WBGene00004421	chrII	chrII:8143810-8144621	359.47	982.333	1.45034	0.00102279	yes
rpl-11.1	T22F3.4	WBGene00004422	chrV	chrV:3585323-3586063	361.191	911.977	1.33624	0.00371479	yes
rpl-11.2	F07D10.1	WBGene00004423	chrX	chrX:2241747-2242612	148.153	650.011	2.13337	1.2e-06	yes
rpl-14	C04F12.4	WBGene00004426	chrI	chrI:9689175-9690067	197.783	469.073	1.2459	0.0319532	yes
rpl-15	K11H12.2	WBGene00004427	chrIV	chrIV:653438-654582	253.484	689.899	1.44449	0.00151162	yes
rpl-18	Y45F10D.12	WBGene00004430	chrIV	chrIV:13777783-13778790	255.114	672.538	1.39847	0.00232368	yes
rpl-2	B0250.1	WBGene00004413	chrV	chrV:20479655-20485354	297.747	857.809	1.52657	0.000469145	yes
rpl-21	C14B9.7	WBGene00004433	chrIII	chrIII:8129483-8130167	271.333	805.734	1.57024	0.000679133	yes
rpl-22	C27A2.2	WBGene00004434	chrII	chrII:5055607-5056213	108.207	381.389	1.81747	0.00326227	yes
rpl-24.1	D1007.12	WBGene00004436	chrI	chrI:4585113-4586178	229.928	552.551	1.26493	0.0144272	yes
rpl-25.1	F55D10.2	WBGene00004438	chrX	chrX:4715146-4715769	92.351	294.942	1.67523	0.00479693	yes
rpl-26	F28C6.7	WBGene00004440	chrII	chrII:8602733-8603530	182.239	542.942	1.57497	0.019731	yes
rpl-28	R11D1.8	WBGene00004442	chrV	chrV:12727616-12728095	118.616	317.246	1.41931	0.0292991	yes
rpl-3	F13B10.2	WBGene00004414	chrIII	chrIII:3867832-3869527	551.655	1521.07	1.46325	0.00362323	yes
rpl-30	Y106G6H.3	WBGene00004444	chrI	chrI:10436254-10436867	209.262	613.157	1.55094	0.00658998	yes
rpl-33	F10E7.7	WBGene00004447	chrII	chrII:7105513-7110015	88.0263	284.941	1.69466	0.00272494	yes
rpl-35	ZK652.4	WBGene00004449	chrIII	chrIII:7855050-7855608	255.536	598.04	1.22671	0.019731	yes
rpl-4	B0041.4	WBGene00004415	chrI	chrI:4645641-4646966	522.477	1669.58	1.67604	0.00010506	yes
rpl-43	Y48B6A.2	WBGene00004456	chrII	chrII:14155202-14155585	188.712	474.139	1.32912	0.0345557	yes
rpl-5	F54C9.5	WBGene00004416	chrII	chrII:8569873-8570999	259.424	791.474	1.60923	0.000178347	yes
rpl-6	R151.3	WBGene00004417	chrIII	chrIII:7208369-7209800	253.923	756.075	1.57414	0.000327209	yes
rpl-7	F53G12.10	WBGene00004418	chrI	chrI:111035-112268	429.921	1007.4	1.2285	0.00844802	yes
rpl-7A	Y24D9A.4	WBGene00004419	chrIV	chrIV:4389127-4390624	1927.34	5662.07	1.55472	0.0104897	yes
rpl-9	R13A5.8	WBGene00004420	chrIII	chrIII:7572037-7572766	208.61	816.191	1.9681	6.77e-06	yes
rpn-12	ZK20.5	WBGene00004468	chrII	chrII:11653034-11654123	150.404	50.8348	-1.56495	0.0101632	yes
rpn-9	T06D8.8	WBGene00004465	chrII	chrII:11237384-11239028	213.258	95.0388	-1.16601	0.0244363	yes
rps-0	B0393.1	WBGene00004469	chrIII	chrIII:4752962-4754048	254.468	774.325	1.60546	0.000206504	yes
rps-1	F56F3.5	WBGene00004470	chrIII	chrIII:4475886-4476856	292.511	872.744	1.57707	0.00024493	yes
rps-10	D1007.6	WBGene00004479	chrI	chrI:4583878-4584513	249.053	540.711	1.11841	0.0381583	yes
rps-11	F40F11.1	WBGene00004480	chrIV	chrIV:11602610-11603262	314.957	771.354	1.29224	0.00730081	yes
rps-12	F54E7.2	WBGene00004481	chrIII	chrIII:5679252-5680142	182.152	410.376	1.1718	0.0473682	yes
rps-13	C16A3.9	WBGene00004482	chrIII	chrIII:6374045-6374950	223.013	743.386	1.73698	0.000212424	yes
rps-14	F37C12.9	WBGene00004483	chrIII	chrIII:7178921-7179542	262.249	652.175	1.31432	0.00836065	yes
rps-15	F36A2.6	WBGene00004484	chrI	chrI:8815547-8816187	231.324	682.161	1.5602	0.00125641	yes
rps-17	T08B2.10	WBGene00004486	chrI	chrI:6220092-6220766	311.779	882.417	1.50094	0.00172116	yes
rps-2	C49H3.11	WBGene00004471	chrIV	chrIV:7925337-7926380	246.22	746.052	1.59933	0.000212424	yes
rps-20	Y105E8A.16	WBGene00004489	chrI	chrI:14468311-14469342	213.675	476.77	1.15788	0.0185454	yes
rps-23	F28D1.7	WBGene00004492	chrIV	chrIV:12390241-12391031	304.081	823.73	1.43772	0.0029093	yes
rps-25	K02B2.5	WBGene00004494	chrIV	chrIV:5947023-5947595	256.72	579.979	1.1758	0.0356028	yes
rps-26	F39B2.6	WBGene00004495	chrI	chrI:14759918-14760634	223.357	609.268	1.44773	0.00529195	yes
rps-27	F56E10.4	WBGene00004496	chrV	chrV:103384-104070	304.074	684.184	1.16996	0.0479548	yes
rps-3	C23G10.3	WBGene00004472	chrIII	chrIII:6206748-6207919	369.047	866.676	1.23169	0.00733374	yes
rps-4	Y43B11AR.4	WBGene00004473	chrIV	chrIV:7083685-7084673	268.101	955.466	1.83343	1.6e-05	yes
rps-5	T05E11.1	WBGene00004474	chrIV	chrIV:11110080-11111031	247.306	642.134	1.37658	0.00268305	yes
rps-6	Y71A12B.1	WBGene00004475	chrI	chrI:13952148-13953177	227.427	797.625	1.81031	2.44e-05	yes
rps-7	ZC434.2	WBGene00004476	chrI	chrI:10330862-10331737	292.844	677.922	1.21099	0.0129121	yes
rps-8	F42C5.8	WBGene00004477	chrIV	chrIV:7312970-7313855	379.08	1280.38	1.756	3.17e-05	yes
rps-9	F40F8.10	WBGene00004478	chrII	chrII:11125345-11126310	242.988	684.76	1.49471	0.00116559	yes
rpt-1	C52E4.4	WBGene00004501	chrV	chrV:11980482-11982417	233.173	92.1607	-1.33918	0.00533685	yes
rrf-2	M01G12.12	WBGene00004509	chrI	chrI:12098674-12105968	10.4017	53.9725	2.37541	3.43e-07	yes
rsp-3	Y111B2A.18	WBGene00004700	chrIII	chrIII:12686151-12687821	182.835	86.1206	-1.08611	0.0388802	yes
ruvb-2	T22D1.10	WBGene00020687	chrIV	chrIV:6917128-6919395	378.753	138.026	-1.45632	0.00110998	yes
sams-1	C49F5.1	WBGene00008205	chrX	chrX:11965912-11969716	13.2988	1.74243	-2.93213	0.0218187	yes
sar-1	ZK180.4	WBGene00022678	chrIV	chrIV:4511888-4513314	78.9715	19.3858	-2.02633	0.00255359	yes
sas-5	F35B12.5	WBGene00009385	chrV	chrV:11610689-11613036	569.515	279.588	-1.02643	0.0317661	yes
sdc-1	F52E10.1	WBGene00004745	chrX	chrX:16275695-16282363	17.4215	59.1478	1.76345	0.000232778	yes
sdc-3	C25D7.3	WBGene00004747	chrV	chrV:15039339-15047774	7.64194	36.0049	2.23618	2.52e-06	yes
sdha-1	C03G5.1	WBGene00015391	chrX	chrX:8542813-8545968	22.9749	52.2836	1.1863	0.0482251	yes
sdha-2	C34B2.7	WBGene00016392	chrI	chrI:10683274-10685613	227.052	69.1383	-1.71547	0.000117958	yes
sdpn-1	F45E1.7	WBGene00018467	chrX	chrX:7988891-7998086	2.03846	12.9502	2.66742	0.0473682	yes
sdz-25	M116.4	WBGene00019791	chrIV	chrIV:8410564-8412154	40.2407	3.62935	-3.47087	0.00288071	yes
sdz-27	R07H5.4	WBGene00011124	chrIV	chrIV:11186990-11188226	101.515	1908.71	4.23284	0	yes
sec-6	F09E5.5	WBGene00017284	chrII	chrII:5359542-5373404	57.6387	160.675	1.47903	0.0166547	yes
selb-1	C47B2.7	WBGene00008133	chrI	chrI:12978827-12982429	32.4621	85.5368	1.39779	0.0445304	yes
set-31	C15H11.5	WBGene00007615	chrV	chrV:14417939-14421425	253.73	110.753	-1.19595	0.0474149	yes
set-4	C32D5.5	WBGene00016313	chrII	chrII:6329819-6331283	108.411	18.9626	-2.51528	2.57e-05	yes
sin-3	F02E9.4	WBGene00004117	chrI	chrI:8416825-8426078	40.3607	97.2438	1.26865	0.00751391	yes
sir-2.1	R11A8.4	WBGene00004800	chrIV	chrIV:10363299-10366216	403.892	118.005	-1.77512	2.29e-05	yes
skpt-1	F48E8.7	WBGene00018613	chrIII	chrIII:5446470-5448380	783.625	329.867	-1.24828	0.032642	yes
skr-1	F46A9.5	WBGene00004807	chrI	chrI:9470760-9475161	239.403	113.499	-1.07676	0.0330494	yes
skr-16	C42D4.6	WBGene00004822	chrIV	chrIV:7168697-7169334	5.20205	43.4172	3.06112	0.0303734	yes
skr-21	K08H2.1	WBGene00004827	chrX	chrX:13225741-13226595	15.7181	1.43011	-3.45824	0.0482613	yes
sma-1	R31.1	WBGene00004855	chrV	chrV:11899544-11916604	12.616	34.0363	1.43182	0.00230439	yes
smf-1	K11G12.4	WBGene00004876	chrX	chrX:6719630-6723027	3.35179	17.7771	2.40701	0.0482786	yes
smo-1	K12C11.2	WBGene00004888	chrI	chrI:1340679-1344696	292.776	87.7456	-1.7384	0.0154964	yes
smu-2	Y49F6B.4	WBGene00004896	chrII	chrII:3482438-3490142	414.342	203.571	-1.02529	0.0345444	yes
sna-1	W02F12.6	WBGene00020951	chrV	chrV:6709562-6710579	1615.23	698.453	-1.2095	0.00703162	yes
snr-1	Y116A8C.42	WBGene00004914	chrIV	chrIV:17088020-17088799	254.104	105.928	-1.26233	0.0364259	yes
snr-4	C52E4.3	WBGene00004917	chrV	chrV:11978512-11979951	233.516	53.1584	-2.13515	0.000119684	yes
sod-5	ZK430.3	WBGene00007036	chrII	chrII:4417682-4419045	44.5838	249.234	2.48291	7.62e-05	yes
sodh-1	K12G11.3	WBGene00010790	chrV	chrV:11888216-11889615	11.6864	47.7329	2.03015	0.0105524	yes
sop-2	C50E10.4	WBGene00004945	chrII	chrII:12339879-12344701	25.5439	59.3663	1.21666	0.030076	yes
sox-2	K08A8.2	WBGene00004949	chrX	chrX:7458244-7463691	13.0598	0.179193	-6.18748	0.00858939	yes
spc-1	K10B3.10	WBGene00004951	chrX	chrX:3117430-3127063	16.8537	49.8019	1.56314	0.000541478	yes
spd-2	F32H2.3	WBGene00004953	chrI	chrI:8966977-8970121	287.721	129.202	-1.15504	0.0133061	yes
spe-41	K01A11.4	WBGene00004976	chrIII	chrIII:3439000-3444199	4.27513	18.6352	2.12399	0.00667503	yes
spl-1	Y66H1B.4	WBGene00004981	chrIV	chrIV:379899-383185	52.8422	12.8451	-2.04047	0.00137685	yes
spn-4	ZC404.8	WBGene00004984	chrV	chrV:6783168-6784905	190.642	33.3984	-2.51301	2.49e-07	yes
spr-4	C09H6.1	WBGene00005009	chrI	chrI:8103595-8109221	18.2873	69.3513	1.92308	0.000161486	yes
sptl-3	T22G5.5	WBGene00011932	chrV	chrV:13893351-13896391	11.4651	31.3587	1.45162	0.044455	yes
sqrd-1	F02H6.5	WBGene00008538	chrIV	chrIV:14219849-14224414	53.5781	197.747	1.88394	3.92e-05	yes
sqt-3	F23H12.4	WBGene00005018	chrV	chrV:12352974-12354295	240.179	21.2905	-3.49583	3.12e-08	yes
src-2	F49B2.5	WBGene00005078	chrI	chrI:14322224-14328914	5.75646	0.346817	-4.05293	0.0306485	yes
srs-2	C47E12.1	WBGene00005663	chrIV	chrIV:10003704-10005949	103.256	250.505	1.27862	0.00729956	yes
srt-42	Y46H3A.1	WBGene00021599	chrV	chrV:1807477-1809467	30.7551	1.11243	-4.78904	0.0148714	yes
stdh-1	C06B3.4	WBGene00007363	chrV	chrV:13906482-13907962	14.6705	126.026	3.10273	3.71e-06	yes
sto-1	F08C6.4	WBGene00006063	chrX	chrX:7562789-7564758	161.269	49.4069	-1.70668	0.0115032	yes
sym-1	C44H4.3	WBGene00006366	chrX	chrX:14581584-14589017	53.2743	2.72055	-4.29147	3.15e-06	yes
sym-5	C44H4.2	WBGene00002282	chrX	chrX:14578016-14580840	22.4741	5.96519	-1.91362	0.0170307	yes
syp-1	F26D2.2	WBGene00006375	chrV	chrV:16405742-16407679	30.1992	109.471	1.85797	0.000407121	yes
tag-114	F23B12.6	WBGene00006465	chrV	chrV:14447635-14449572	573.661	247.347	-1.21367	0.0076514	yes
tag-123	F08F1.7	WBGene00006472	chrX	chrX:8418592-8422002	30.4315	76.6965	1.3336	0.0106462	yes
tag-135	D1054.15	WBGene00006481	chrV	chrV:10806114-10807892	606.147	117.763	-2.36378	6.98e-09	yes
tag-146	C27A12.3	WBGene00006492	chrI	chrI:6038407-6041271	31.0416	10.0766	-1.6232	0.0416066	yes
tag-172	E02H4.3	WBGene00006517	chrX	chrX:14284765-14293923	5.94708	31.0611	2.38485	0.0322757	yes
tag-242	C14A4.1	WBGene00007555	chrII	chrII:10579893-10580984	91.1514	209.983	1.20394	0.0263075	yes
tag-256	ZK637.3	WBGene00014023	chrIII	chrIII:8890150-8894126	102.198	35.5138	-1.52491	0.00300728	yes
tag-299	F14F3.3	WBGene00008806	chrX	chrX:14979303-14980040	11.7652	54.4876	2.2114	0.0397947	yes
tag-30	F38H4.7	WBGene00006415	chrIV	chrIV:11850928-11854913	310.921	103.888	-1.58151	0.000430617	yes
tag-32	T13A10.11	WBGene00006416	chrIV	chrIV:6277423-6279520	2.97241	63.428	4.41542	0.000304979	yes
tag-343	F43B10.2	WBGene00018374	chrX	chrX:16665042-16674659	0.379677	8.77514	4.53058	0.0132394	yes
tag-349	Y73F8A.34	WBGene00013538	chrIV	chrIV:15524065-15528611	264.81	78.8876	-1.74708	0.0197677	yes
tag-51	K02F3.1	WBGene00006430	chrIII	chrIII:854208-856521	162.274	76.0664	-1.0931	0.0413156	yes
tag-52	C02F12.4	WBGene00006431	chrX	chrX:3674036-3678542	36.3721	2.73659	-3.73238	4.68e-06	yes
tag-68	F37D6.6	WBGene00006445	chrI	chrI:10501588-10505435	4.23637	32.3571	2.93318	0.00250226	yes
tbb-6	T04H1.9	WBGene00006539	chrV	chrV:12261784-12263349	0.528691	25.6704	5.60154	0.00460431	yes
tbc-11	F35H12.2	WBGene00018075	chrX	chrX:924984-932235	5.36241	44.3392	3.04763	0.000130624	yes
tbc-3	F32B6.8	WBGene00009322	chrIV	chrIV:9898990-9902484	358.328	85.936	-2.05995	2.79e-05	yes
tbx-2	F21H11.3	WBGene00006543	chrIII	chrIII:5130887-5136280	36.7938	12.9436	-1.50722	0.0377066	yes
tgt-1	ZK829.6	WBGene00006566	chrIV	chrIV:11957524-11959747	35.0334	122.775	1.80921	0.000629445	yes
K02H11.6	K02H11.6	WBGene00019349	chrV	chrV:1533891-1534415	536.603	238.767	-1.16825	0.0439077	yes
tim-1	Y75B8A.22	WBGene00006571	chrIII	chrIII:12240265-12250053	46.749	104.123	1.15528	0.0172874	yes
tir-1	F13B10.1	WBGene00006575	chrIII	chrIII:3869576-3901446	60.7083	10.9686	-2.46852	0.00480764	yes
tlp-1	T23G4.1	WBGene00006580	chrIV	chrIV:13701215-13704003	12.8636	2.52237	-2.35044	0.0488047	yes
trap-1	Y71F9AM.6	WBGene00022122	chrI	chrI:2928394-2929659	265.401	74.602	-1.83089	0.000144458	yes
tre-1	F57B10.7	WBGene00006607	chrI	chrI:6554729-6558594	1077.61	321.267	-1.74599	2.62e-05	yes
try-1	ZK546.15	WBGene00006619	chrII	chrII:4948149-4949480	284.417	7.48325	-5.2482	4.4e-13	yes
tza-1	Y38F2AL.2	WBGene00021416	chrIV	chrIV:2304445-2306540	17.2617	0.684553	-4.65627	0.0458227	yes
ubc-25	F25H2.8	WBGene00006720	chrI	chrI:10562956-10564903	175.481	83.4717	-1.07195	0.0405467	yes
ubl-1	H06I04.4	WBGene00006725	chrIII	chrIII:3068297-3069202	165.474	476.244	1.5251	0.00941286	yes
ubq-1	F25B5.4	WBGene00006727	chrIII	chrIII:5940196-5946078	361.692	75.7689	-2.25509	2.03e-05	yes
ubq-2	ZK1010.1	WBGene00006728	chrIII	chrIII:12977808-12978428	296.765	699.777	1.23757	0.0156166	yes
ugt-50	T07C5.1	WBGene00011564	chrX	chrX:12691537-12697928	112.56	20.1312	-2.48318	0.00698091	yes
ugt-57	F01E11.1	WBGene00017154	chrX	chrX:6991713-6994108	8.43021	0	-1.79769e+308	0.00298594	yes
ugt-61	F39G3.1	WBGene00018206	chrV	chrV:4742412-4745364	16.2583	3.08484	-2.39791	0.0202272	yes
uig-1	F32F2.1	WBGene00009337	chrV	chrV:13273575-13283972	6.38388	1.13868	-2.48707	0.0425056	yes
ulp-2	Y38A8.3	WBGene00006737	chrII	chrII:4955639-4959869	129.653	41.6721	-1.63751	0.000366205	yes
unc-3	Y16B4A.1	WBGene00006743	chrX	chrX:14773468-14783495	15.4531	0.331208	-5.54401	0.00187517	yes
unc-38	F21F3.5	WBGene00006774	chrI	chrI:4897691-4900978	18.104	166.789	3.20364	9.15e-11	yes
unc-39	F56A12.1	WBGene00006775	chrV	chrV:14373373-14375784	37.9291	0.793989	-5.57804	0.000145603	yes
unc-42	F58E6.10	WBGene00006778	chrV	chrV:9764620-9769337	19.2916	1.26963	-3.92549	0.0154964	yes
unc-50	T07A5.2	WBGene00006785	chrIII	chrIII:10314491-10318059	16.3158	2.71032	-2.58973	0.0317388	yes
unc-54	F11C3.3	WBGene00006789	chrI	chrI:14846466-14863529	5.87151	17.4748	1.57347	0.0241028	yes
unc-6	F41C6.1	WBGene00006746	chrX	chrX:6889648-6897095	4.99025	0.113907	-5.45319	0.00512169	yes
unc-86	C30A5.7	WBGene00006818	chrIII	chrIII:8212686-8216555	10.2793	1.1944	-3.10538	0.0226854	yes
vab-10	ZK1151.1	WBGene00006876	chrI	chrI:11747419-11792109	9.25739	33.6349	1.86128	0.00106499	yes
ver-3	F59F3.1	WBGene00006896	chrX	chrX:10992443-10997763	9.85584	2.96828	-1.73135	0.0482251	yes
vha-12	F20B6.2	WBGene00006921	chrX	chrX:4191067-4193115	127.826	60.3145	-1.0836	0.045002	yes
vha-13	Y49A3A.2	WBGene00013025	chrV	chrV:14350859-14355706	84.1342	21.8767	-1.9433	0.00135939	yes
vha-16	C30F8.2	WBGene00016258	chrI	chrI:5079917-5082284	112.613	18.3053	-2.62104	4.95e-06	yes
viln-1	C10H11.1	WBGene00015691	chrI	chrI:4747627-4759602	158.307	338.885	1.09808	0.0228216	yes
vps-26	T20D3.7	WBGene00006931	chrIV	chrIV:9339405-9341773	115.577	40.7941	-1.50242	0.0374372	yes
vps-39	T08G5.5	WBGene00011625	chrV	chrV:14034319-14038357	86.2958	28.8976	-1.57834	0.0129121	yes
wht-2	C10C6.5	WBGene00007513	chrIV	chrIV:11470162-11479229	562.666	174.163	-1.69184	0.0421228	yes
wrn-1	F18C5.2	WBGene00006944	chrII	chrII:6554944-6559227	31.4924	70.7736	1.16821	0.0240083	yes
wrt-10	ZK1290.8	WBGene00006956	chrII	chrII:7533251-7534466	32.9667	1.07221	-4.94236	0.00250226	yes
xpg-1	F57B10.6	WBGene00019004	chrI	chrI:6558700-6562300	56.4815	125.588	1.15285	0.0221152	yes
yop-1	Y71F9B.3	WBGene00022127	chrI	chrI:2730003-2731456	332.633	124.257	-1.4206	0.00623873	yes
zeel-1	Y39G10AR.5	WBGene00021463	chrI	chrI:2342384-2350470	10.6156	0.557436	-4.25124	0.00157422	yes
zfp-2	F35H8.3	WBGene00009448	chrII	chrII:9557586-9559454	331.125	96.6975	-1.77583	6.11e-05	yes
zig-7	F54D7.4	WBGene00006984	chrI	chrI:4790411-4792502	168.913	391.187	1.21158	0.012762	yes
zip-1	Y75B8A.35	WBGene00006986	chrIII	chrIII:12335653-12351237	6.55729	50.9716	2.95852	0.000211525	yes
zmp-1	EGAP1.3	WBGene00006987	chrIII	chrIII:5926040-5932908	1.27841	20.4564	4.00012	0.010624	yes
ztf-17	T09A5.12	WBGene00011639	chrII	chrII:7866202-7870112	27.15	80.2784	1.56406	0.00143659	yes
ztf-23	Y54E10BR.8	WBGene00021846	chrI	chrI:3052053-3059167	323.381	68.9346	-2.22994	6.85e-07	yes
ztf-25	Y6G8.3	WBGene00012405	chrV	chrV:17601796-17602921	24.545	2.41441	-3.34568	0.0072557	yes
zyg-11	C08B11.1	WBGene00006996	chrII	chrII:8017628-8020714	41.4116	11.5156	-1.84644	0.00175227	yes
zyg-12	ZK546.1	WBGene00006997	chrII	chrII:4949895-4953482	53.2221	20.6928	-1.36289	0.0257576	yes
zyg-8	Y79H2A.11	WBGene00006993	chrIII	chrIII:12061638-12072176	17.4517	41.7525	1.2585	0.0380752	yes
zyg-9	F22B5.7	WBGene00006994	chrII	chrII:8457766-8464466	65.2421	143.784	1.14003	0.0154964	yes

## Sheet: Smartseq_WT-emb_vs_nos-emb
test_id	gene_ID	Wormbase ID	locus	locus.1	Wild-type EMB PGCs FPKM	nos-1/2 EMB PGC FPKM	log2.fold_change.	q_value	significant
C07D8.6	C07D8.6	WBGene00015565	chrX	chrX:7341462-7342730	15.3105	165.349	3.43292	2.09e-06	yes
C14F11.1	C14F11.1	WBGene00015778	chrX	chrX:6240918-6242670	3.97612	61.6506	3.95468	0.00109551	yes
C18B12.6	C18B12.6	WBGene00007668	chrX	chrX:15003997-15007238	20.8494	99.6747	2.25722	0.00943802	yes
C25A11.2	C25A11.2	WBGene00016087	chrX	chrX:9114311-9116820	6.17765	29.8957	2.27481	0.0216431	yes
C27C12.4	C27C12.4	WBGene00007774	chrX	chrX:14854061-14856449	22.4762	130.781	2.54068	0.000484792	yes
C31E10.6	C31E10.6	WBGene00007847	chrX	chrX:13996237-13999220	6.42616	29.8075	2.21365	0.0314558	yes
C36C9.1	C36C9.1	WBGene00016485	chrX	chrX:1682950-1686378	2.72236	22.2671	3.03198	0.00353796	yes
F08G12.2	F08G12.2	WBGene00008586	chrX	chrX:11298016-11299623	129.658	486.104	1.90656	0.039194	yes
K09A9.4	K09A9.4	WBGene00010702	chrX	chrX:15591299-15595286	1.51323	16.7771	3.47079	0.0082918	yes
R04D3.3	R04D3.3	WBGene00011011	chrX	chrX:13288926-13290559	2.71833	110.794	5.34902	1.52e-06	yes
R09F10.8	R09F10.8	WBGene00019989	chrX	chrX:8325081-8326400	5.19625	174.388	5.06869	9.83e-08	yes
T07F12.2	T07F12.2	WBGene00020322	chrX	chrX:4890190-4892298	40.1224	421.313	3.39241	3.26e-07	yes
W05H9.3	W05H9.3	WBGene00021050	chrX	chrX:6252239-6253743	142.742	598.717	2.06846	0.0241794	yes
ZC504.3	ZC504.3	WBGene00013917	chrX	chrX:10416640-10419691	11.1135	41.8601	1.91326	0.0302455	yes
ZK563.5	ZK563.5	WBGene00022769	chrX	chrX:3377186-3379220	41.1953	181.407	2.13867	0.00952869	yes
acdh-10	T08G2.3	WBGene00020366	chrX	chrX:17213084-17214831	12.7559	70.0523	2.45727	0.0031202	yes
acdh-7	T25G12.5	WBGene00020812	chrX	chrX:17214943-17217033	12.0859	59.5389	2.30051	0.00987832	yes
apm-3	F53H8.1	WBGene00000164	chrX	chrX:954931-957760	17.4962	142.201	3.02282	6.35e-06	yes
csb-1	F53H4.1	WBGene00000803	chrX	chrX:15861290-15865843	4.29977	33.1354	2.94604	0.000357768	yes
ekl-5	Y26E6A.1	WBGene00012512	chrX	chrX:13914799-13917101	2.48487	35.0624	3.81868	0.000484792	yes
gei-12	F52D2.4	WBGene00001569	chrX	chrX:1986517-1989599	3.17979	24.3643	2.93776	0.00240276	yes
gly-13	B0416.6	WBGene00001638	chrX	chrX:9293615-9296563	13.8937	60.4934	2.12235	0.0147101	yes
hnd-1	C44C10.8	WBGene00001981	chrX	chrX:11684660-11685579	64.9316	503.269	2.95434	6.35e-06	yes
hst-2	C34F6.4	WBGene00002029	chrX	chrX:11204082-11207026	15.8903	85.7939	2.43272	0.00913471	yes
lsy-2	F49H12.1	WBGene00003087	chrX	chrX:2089659-2093240	39.4233	315.018	2.99831	1.39e-05	yes
mek-1	K08A8.1	WBGene00003185	chrX	chrX:7479202-7480965	10.1591	105.523	3.3767	4.85e-06	yes
nck-1	ZK470.5	WBGene00006410	chrX	chrX:4148632-4153419	13.2674	118.906	3.16387	0.00138916	yes
nhr-71	K11E4.5	WBGene00003661	chrX	chrX:13747246-13751727	2.17447	21.5164	3.3067	0.00571073	yes
Y71H10A.1	Y71H10A.1	WBGene00022199	chrX	chrX:2940861-2945470	85.6536	410.887	2.26216	0.0039357	yes
rgs-11	F45B8.1	WBGene00004354	chrX	chrX:14964512-14965863	59.1528	309.02	2.38518	0.00878979	yes
rgs-8.2	Y59E1A.2	WBGene00021988	chrX	chrX:1952472-1953554	21.5627	166.396	2.94801	0.00214502	yes
sdha-1	C03G5.1	WBGene00015391	chrX	chrX:8542813-8545968	3.37713	24.0436	2.83179	0.00575109	yes
sec-3	F52E4.7	WBGene00018703	chrX	chrX:3095437-3099827	2.96917	16.3659	2.46257	0.0311665	yes
tag-123	F08F1.7	WBGene00006472	chrX	chrX:8418592-8422002	5.44985	31.8472	2.54688	0.00605559	yes
tra-4	F53B3.1	WBGene00018740	chrX	chrX:2853686-2857595	8.925	60.5311	2.76175	0.000321989	yes
vha-12	F20B6.2	WBGene00006921	chrX	chrX:4191067-4193115	9.52304	133.775	3.81224	5.71e-09	yes
vha-15	T14F9.1	WBGene00020507	chrX	chrX:2237900-2240247	8.2899	48.2663	2.54159	0.00291644	yes
F25B4.5	F25B4.5	WBGene00017768	chrV	chrV:5678583-5682617	27.4636	87.7954	1.67663	0.0461295	yes
F25H9.2	F25H9.2	WBGene00009135	chrV	chrV:13458129-13459425	3.69368	52.6516	3.83334	0.00670794	yes
F32D1.5	F32D1.5	WBGene00017984	chrV	chrV:4369336-4371351	48.5544	364.336	2.90759	2.09e-06	yes
F33E11.3	F33E11.3	WBGene00018011	chrV	chrV:300027-304714	16.984	63.9054	1.91176	0.0136648	yes
F43D2.1	F43D2.1	WBGene00009650	chrV	chrV:14612541-14613574	91.725	306.162	1.73891	0.0371593	yes
F47H4.1	F47H4.1	WBGene00009834	chrV	chrV:17347896-17350151	3.81727	107.108	4.81038	5.84e-05	yes
H27A22.1	H27A22.1	WBGene00010418	chrV	chrV:10602436-10605544	28.1743	98.2861	1.80261	0.0305914	yes
H43I07.3	H43I07.3	WBGene00019276	chrV	chrV:4195601-4199357	39.5585	161.201	2.0268	0.00575109	yes
K07B1.6	K07B1.6	WBGene00019466	chrV	chrV:9342770-9344194	128.995	510.871	1.98564	0.0236651	yes
K07B1.8	K07B1.8	WBGene00019468	chrV	chrV:9339116-9340910	261.382	66.0451	-1.98463	0.0471279	yes
K10C8.1	K10C8.1	WBGene00010734	chrV	chrV:12692523-12695237	48.9705	8.93346	-2.45462	0.00840271	yes
R07B7.10	R07B7.10	WBGene00011094	chrV	chrV:12084406-12086281	3.41445	39.1966	3.521	0.0280593	yes
R09E12.3	R09E12.3	WBGene00019983	chrV	chrV:773550-774855	113.979	412.226	1.85467	0.0165454	yes
T16G1.9	T16G1.9	WBGene00011802	chrV	chrV:12944844-12950642	2.66377	15.3534	2.52702	0.0243037	yes
W03F9.1	W03F9.1	WBGene00020999	chrV	chrV:124045-126745	33.8993	135.002	1.99365	0.00815733	yes
W07G4.4	W07G4.4	WBGene00002250	chrV	chrV:13043696-13046340	11.6948	139.891	3.58037	7.3e-09	yes
cyb-3	T06E6.2	WBGene00000868	chrV	chrV:15395678-15397332	77.9537	306.471	1.97506	0.0453352	yes
cyn-7	Y75B12B.2	WBGene00000883	chrV	chrV:15186562-15187770	151.768	530.369	1.80513	0.0352444	yes
fbxa-106	Y59A8B.11	WBGene00013348	chrV	chrV:18082406-18083417	80.8277	17.6823	-2.19254	0.0346811	yes
fbxa-95	F28F8.4	WBGene00009222	chrV	chrV:15571469-15572650	157.601	40.2337	-1.9698	0.0380928	yes
fbxb-7	Y20C6A.2	WBGene00012492	chrV	chrV:17377396-17379201	7.09365	69.4421	3.29121	0.00109551	yes
glo-4	F07C3.4	WBGene00017195	chrV	chrV:9234601-9243141	0.46785	6.00731	3.6826	0.0221211	yes
gst-44	F13A7.10	WBGene00001792	chrV	chrV:16390913-16392386	3.66743	47.8826	3.70666	0.0314558	yes
mcm-7	F32D1.10	WBGene00003159	chrV	chrV:4347149-4349754	74.7834	265.931	1.83026	0.0338593	yes
mom-2	F38E1.7	WBGene00003395	chrV	chrV:8355967-8358165	52.5931	416.7	2.98606	4.99e-06	yes
scl-27	ZK6.3	WBGene00022638	chrV	chrV:400257-401603	3.0401	218.258	6.16577	0.000370556	yes
B0035.3	B0035.3	WBGene00007106	chrIV	chrIV:11314054-11315028	120.202	489.289	2.02523	0.00840271	yes
B0212.3	B0212.3	WBGene00015037	chrIV	chrIV:3540183-3543598	5.01531	34.6273	2.7875	0.00528328	yes
C01F6.1	C01F6.1	WBGene00007221	chrIV	chrIV:9096826-9101570	18.0243	66.458	1.8825	0.0232943	yes
C24D10.5	C24D10.5	WBGene00016056	chrIV	chrIV:5150250-5151024	10.3855	97.2897	3.22772	0.0143361	yes
C25G4.7	C25G4.7	WBGene00007734	chrIV	chrIV:12456936-12458538	2.55831	32.4197	3.66361	0.0207845	yes
C42C1.8	C42C1.8	WBGene00016586	chrIV	chrIV:12291023-12301258	12.9927	66.4492	2.35455	0.0031202	yes
C48A7.2	C48A7.2	WBGene00016739	chrIV	chrIV:7393209-7397546	39.4578	227.532	2.52769	9.56e-05	yes
C53D6.6	C53D6.6	WBGene00008283	chrIV	chrIV:9027675-9032636	4.77501	24.7447	2.37354	0.0314558	yes
C55C3.3	C55C3.3	WBGene00016953	chrIV	chrIV:5685281-5688249	1.97901	205.606	6.69896	4.6e-10	yes
D1046.3	D1046.3	WBGene00008364	chrIV	chrIV:8930428-8932710	11.9974	48.9211	2.02773	0.0462483	yes
F15B10.1	F15B10.1	WBGene00017480	chrIV	chrIV:6603991-6606177	13.6744	59.0839	2.11128	0.0338593	yes
F59B8.2	F59B8.2	WBGene00010317	chrIV	chrIV:9439069-9440790	68.1415	300.75	2.14196	0.00532287	yes
H04M03.3	H04M03.3	WBGene00019153	chrIV	chrIV:5891559-5893317	2.61987	68.9287	4.71754	0.000664911	yes
M70.4	M70.4	WBGene00019786	chrIV	chrIV:2253010-2263660	34.6766	8.40264	-2.04505	0.0391337	yes
ZC410.3	ZC410.3	WBGene00013881	chrIV	chrIV:9074655-9078582	26.0756	193.894	2.89449	0.0380639	yes
Y37A1B.17	Y37A1B.17	WBGene00044989	chrIV	chrIV:13964341-13979814	1.72458	12.9486	2.90848	0.00335086	yes
Y54G2A.4	Y54G2A.4	WBGene00021870	chrIV	chrIV:2931406-2936823	8.18647	48.1309	2.55565	0.00521395	yes
Y67H2A.5	Y67H2A.5	WBGene00013463	chrIV	chrIV:13300155-13300696	56.5876	267.819	2.2427	0.00592363	yes
ZK829.7	ZK829.7	WBGene00014096	chrIV	chrIV:11959886-11961512	22.9291	85.2136	1.8939	0.0197647	yes
arf-3	F57H12.1	WBGene00000183	chrIV	chrIV:7982513-7987171	52.8223	216.272	2.03363	0.0136191	yes
cpsf-4	F11A10.8	WBGene00044329	chrIV	chrIV:12092299-12093450	33.9573	113.608	1.74228	0.0478973	yes
elo-1	F56H11.4	WBGene00001239	chrIV	chrIV:9526348-9528333	28.368	228.315	3.00869	2.09e-06	yes
hke-4.1	T28F3.3	WBGene00044067	chrIV	chrIV:17285964-17287415	36.0097	135.797	1.915	0.0130949	yes
mex-5	W02A2.7	WBGene00003230	chrIV	chrIV:13353698-13356080	53.9761	344.215	2.67292	0.000101484	yes
oma-1	C09G9.6	WBGene00003864	chrIV	chrIV:8888959-8890987	40.4822	244.161	2.59247	0.000177217	yes
prx-14	R07H5.1	WBGene00004199	chrIV	chrIV:11183116-11184073	25.8624	99.2221	1.9398	0.0454851	yes
pyp-1	C47E12.4	WBGene00008149	chrIV	chrIV:9995442-9998904	80.5379	287.348	1.83506	0.0264795	yes
sand-1	F41H10.11	WBGene00018321	chrIV	chrIV:5366858-5368857	33.9739	122.033	1.84477	0.0165454	yes
F01G10.1	F01G10.1	WBGene00008506	chrIV	chrIV:10243568-10245725	21.113	95.3198	2.17464	0.00204965	yes
uba-1	C47E12.5	WBGene00006699	chrIV	chrIV:9989648-9995013	50.8127	390.366	2.94157	0.000484792	yes
vha-7	C26H9A.1	WBGene00006916	chrIV	chrIV:12640434-12650620	22.9156	86.0058	1.90811	0.0394172	yes
B0303.7	B0303.7	WBGene00015128	chrIII	chrIII:8693556-8699374	5.05094	43.7488	3.11462	0.0142177	yes
C36A4.4	C36A4.4	WBGene00007965	chrIII	chrIII:3841243-3843598	24.9879	121.985	2.2874	0.00101614	yes
F01F1.12	F01F1.12	WBGene00017166	chrIII	chrIII:5873009-5876425	56.8111	1493.51	4.71639	4.6e-10	yes
K12H4.4	K12H4.4	WBGene00019679	chrIII	chrIII:8044948-8045867	39.4791	145.666	1.8835	0.0372983	yes
T12A2.8	T12A2.8	WBGene00020442	chrIII	chrIII:6244644-6248182	81.8121	368.373	2.17078	0.0352444	yes
T12D8.8	T12D8.8	WBGene00011735	chrIII	chrIII:13614609-13622388	70.0851	339.193	2.27493	0.00138916	yes
T16G12.8	T16G12.8	WBGene00011809	chrIII	chrIII:10059210-10061828	8.99349	157.978	4.1347	8.51e-07	yes
W03A5.1	W03A5.1	WBGene00020966	chrIII	chrIII:5408070-5413138	0	14.7534	1.79769e+308	5.15e-05	yes
W03A5.2	W03A5.2	WBGene00020967	chrIII	chrIII:5406076-5407929	4.31325	83.8494	4.28095	0.00109551	yes
Y32H12A.8	Y32H12A.8	WBGene00021316	chrIII	chrIII:5385486-5404946	4.34937	16.3641	1.91166	0.00967289	yes
Y66D12A.9	Y66D12A.9	WBGene00013435	chrIII	chrIII:11568036-11573178	33.4984	124.605	1.8952	0.0317087	yes
Y71H2AM.5	Y71H2AM.5	WBGene00022170	chrIII	chrIII:2786193-2788020	47.3105	348.513	2.88098	0.00847855	yes
ZK637.14	ZK637.14	WBGene00014031	chrIII	chrIII:8887670-8890069	84.3106	455.019	2.43214	0.0453352	yes
bre-3	B0464.4	WBGene00000268	chrIII	chrIII:9469841-9485367	9.63367	37.1161	1.94589	0.0338593	yes
ccdc-55	C16C10.6	WBGene00007627	chrIII	chrIII:4166917-4168739	35.3446	122.674	1.79527	0.0281509	yes
ckb-2	B0285.9	WBGene00000512	chrIII	chrIII:4367803-4370132	3.94881	32.5016	3.04102	0.0147348	yes
cts-1	T20G5.2	WBGene00000833	chrIII	chrIII:10212304-10216553	83.6603	622.232	2.89484	6.35e-06	yes
drs-1	B0464.1	WBGene00001094	chrIII	chrIII:9488646-9491152	49.6572	206.899	2.05885	0.00553923	yes
frl-1	Y48G9A.4	WBGene00021698	chrIII	chrIII:2134464-2151529	26.4645	6.21802	-2.08953	0.0232943	yes
fum-1	H14A12.2	WBGene00001503	chrIII	chrIII:7465539-7468024	83.3347	892.35	3.42062	3.53e-08	yes
inf-1	F57B9.6	WBGene00002083	chrIII	chrIII:6929983-6931898	54.7043	279.162	2.35138	0.000571888	yes
mrp-8	Y75B8A.26	WBGene00003414	chrIII	chrIII:12283106-12294909	26.0676	2.27787	-3.5165	0.00486024	yes
nmt-1	T17E9.2	WBGene00020549	chrIII	chrIII:6114429-6116279	35.6769	140.629	1.97883	0.0216393	yes
obr-1	Y47D3A.17	WBGene00012930	chrIII	chrIII:11257207-11270760	52.5493	9.86833	-2.41279	0.0256318	yes
pqn-45	F56F3.1	WBGene00004132	chrIII	chrIII:4471377-4475112	28.7676	90.9219	1.66018	0.0492314	yes
prs-1	T20H4.3	WBGene00004189	chrIII	chrIII:7238964-7241222	33.5037	125.054	1.90016	0.0250846	yes
ran-1	K01G5.4	WBGene00004302	chrIII	chrIII:10742710-10747631	114.401	655.869	2.51931	0.0298246	yes
rnr-1	T23G5.1	WBGene00004391	chrIII	chrIII:9225294-9228707	44.7081	205.809	2.2027	0.00144988	yes
ubc-20	F40G9.3	WBGene00006715	chrIII	chrIII:188836-190944	39.0417	159.339	2.02901	0.00733566	yes
B0495.9	B0495.9	WBGene00015208	chrII	chrII:7707528-7708660	201.988	805.324	1.9953	0.0182222	yes
C27D9.1	C27D9.1	WBGene00016163	chrII	chrII:4753451-4756780	6.46629	35.7221	2.4658	0.0134335	yes
D1022.4	D1022.4	WBGene00017023	chrII	chrII:7456198-7457287	12.6457	65.5855	2.37473	0.0241996	yes
F09E5.3	F09E5.3	WBGene00017283	chrII	chrII:5373977-5375151	19.653	96.0644	2.28925	0.00592363	yes
F19B10.4	F19B10.4	WBGene00017586	chrII	chrII:3660086-3662621	1.76316	25.4183	3.84963	0.0120388	yes
F22E5.17	F22E5.17	WBGene00017712	chrII	chrII:2678069-2679167	3.85473	102.307	4.73013	8.76e-05	yes
F35C11.5	F35C11.5	WBGene00009404	chrII	chrII:8253216-8255218	11.0962	61.4615	2.46962	0.00183012	yes
R12C12.5	R12C12.5	WBGene00020025	chrII	chrII:6044111-6045147	22.0171	340.43	3.95066	7.3e-09	yes
T13C2.6	T13C2.6	WBGene00020481	chrII	chrII:6783381-6788224	14.5501	64.2072	2.14171	0.00887077	yes
T14B4.3	T14B4.3	WBGene00020500	chrII	chrII:6734866-6736057	93.1743	557.788	2.58171	5.69e-05	yes
T24H10.1	T24H10.1	WBGene00012000	chrII	chrII:9099315-9100393	22.4064	142.767	2.67169	0.000484792	yes
W08F4.3	W08F4.3	WBGene00021093	chrII	chrII:580598-582009	25.2683	125.242	2.30932	0.00553923	yes
bath-45	F29C12.5	WBGene00009247	chrII	chrII:13122967-13124719	40.0895	4.1996	-3.2549	0.00537399	yes
btb-6	F45C12.7	WBGene00018438	chrII	chrII:1715167-1716481	6.75587	41.1591	2.607	0.0236651	yes
bub-3	Y54G9A.6	WBGene00013209	chrII	chrII:13725991-13729535	45.1545	188.249	2.0597	0.00466335	yes
cct-2	T21B10.7	WBGene00000378	chrII	chrII:8927674-8929753	76.9145	259.263	1.75309	0.0453352	yes
fbxc-54	F23F1.3	WBGene00017744	chrII	chrII:31767-33604	9.98479	60.9033	2.60871	0.011163	yes
gst-24	F37B1.1	WBGene00001772	chrII	chrII:13610375-13611272	4.55954	52.2256	3.5178	0.0300045	yes
gst-7	F11G11.2	WBGene00001755	chrII	chrII:4882065-4883355	61.295	516.948	3.07618	5.02e-07	yes
hsp-4	F43E2.8	WBGene00002008	chrII	chrII:7350077-7352593	88.9932	314.1	1.81946	0.0352444	yes
mex-1	W03C9.7	WBGene00003228	chrII	chrII:11968572-11973627	23.8253	109.205	2.19647	0.00187349	yes
mex-6	AH6.5	WBGene00003231	chrII	chrII:9524114-9526307	21.9691	234.422	3.41556	9.83e-08	yes
nos-1	R03D7.7	WBGene00003783	chrII	chrII:10951818-10953105	118.465	0.531656	-7.79976	0.000177217	yes
nos-2	ZK1127.1	WBGene00003784	chrII	chrII:7065009-7069924	925.21	6.55754	-7.14048	0.00361937	yes
prdx-2	F09E5.15	WBGene00006434	chrII	chrII:5378050-5379615	86.0283	346.635	2.01054	0.00816402	yes
puf-5	F54C9.8	WBGene00004241	chrII	chrII:8575489-8577671	60.0209	269.829	2.16851	0.00822637	yes
rad-23	ZK20.3	WBGene00013924	chrII	chrII:11651196-11652842	39.5278	173.343	2.1327	0.00231504	yes
sdhb-1	F42A8.2	WBGene00006433	chrII	chrII:9350650-9352738	63.546	202.214	1.67001	0.0445205	yes
trs-1	C47D12.6	WBGene00006617	chrII	chrII:11688905-11695939	61.2342	246.556	2.00951	0.0314558	yes
ubh-4	C08B11.7	WBGene00006724	chrII	chrII:8038218-8039545	63.0635	200.926	1.67179	0.0441029	yes
ufd-3	C05C10.6	WBGene00007333	chrII	chrII:9940701-9943937	43.9501	148.583	1.75733	0.0492314	yes
wee-1.3	Y53C12A.1	WBGene00006940	chrII	chrII:9713677-9716408	27.2207	116.154	2.09327	0.00528328	yes
C01G8.1	C01G8.1	WBGene00015312	chrI	chrI:5272849-5274325	73.9287	518.823	2.81104	0.00138916	yes
F21F3.3	F21F3.3	WBGene00017673	chrI	chrI:4901974-4903137	16.7315	116.44	2.79895	0.00111067	yes
F30A10.6	F30A10.6	WBGene00009264	chrI	chrI:9488479-9492615	41.8256	231.466	2.46834	0.000105603	yes
F52F12.7	F52F12.7	WBGene00009940	chrI	chrI:9928969-9930876	42.2262	189.076	2.16276	0.00486473	yes
K02F2.2	K02F2.2	WBGene00019322	chrI	chrI:6836388-6838138	61.7171	293.967	2.25191	0.000833926	yes
K04F10.3	K04F10.3	WBGene00019396	chrI	chrI:6358603-6360459	48.0097	674.073	3.8115	1.08e-06	yes
M05B5.4	M05B5.4	WBGene00010872	chrI	chrI:7188492-7190560	11.9624	153.502	3.68168	1.19e-07	yes
T25G3.4	T25G3.4	WBGene00012031	chrI	chrI:7564579-7567712	30.1051	108.79	1.85347	0.0232943	yes
Y53C10A.6	Y53C10A.6	WBGene00013137	chrI	chrI:11998771-12004988	63.9948	224.517	1.8108	0.0471279	yes
car-1	Y18D10A.17	WBGene00012484	chrI	chrI:12904459-12906218	42.931	259.247	2.59423	3.87e-05	yes
chn-1	T09B4.10	WBGene00000500	chrI	chrI:6181315-6183882	75.3939	258.864	1.77968	0.0338593	yes
cpb-3	B0414.5	WBGene00000772	chrI	chrI:5788637-5791755	18.0018	77.9864	2.11508	0.00723596	yes
gpi-1	Y87G2A.8	WBGene00013597	chrI	chrI:13576236-13581573	119.568	1533.76	3.68118	0.000177217	yes
ile-1	K07A1.8	WBGene00002070	chrI	chrI:9606253-9611590	26.7193	242.014	3.17914	2.09e-07	yes
ima-2	F26B1.3	WBGene00002073	chrI	chrI:6315232-6317269	46.1777	230.173	2.31745	0.000438523	yes
mtx-1	F39B2.11	WBGene00009559	chrI	chrI:14755143-14756415	180.191	708.742	1.97573	0.0323996	yes
ncbp-2	F26A3.2	WBGene00009141	chrI	chrI:7642585-7643264	44.8777	235.767	2.39329	0.0073504	yes
npp-17	F10G8.3	WBGene00003803	chrI	chrI:10026630-10030048	29.0836	159.818	2.45816	0.000177217	yes
pfd-3	T06G6.9	WBGene00006889	chrI	chrI:12728161-12729854	161.851	762.689	2.23643	0.00163769	yes
pfn-1	Y18D10A.20	WBGene00003989	chrI	chrI:12921992-12923535	63.2048	290.016	2.19803	0.00231504	yes
rab-11.1	F53G12.1	WBGene00004274	chrI	chrI:108681-110057	55.267	214.183	1.95435	0.00707626	yes
rab-8	D1037.4	WBGene00004272	chrI	chrI:3682875-3684121	81.6707	364.102	2.15645	0.00363477	yes
tag-210	W08E3.3	WBGene00012344	chrI	chrI:13340321-13343924	124.766	535.858	2.10263	0.00521395	yes
tre-1	F57B10.7	WBGene00006607	chrI	chrI:6554729-6558594	115.024	1127.75	3.29345	0.000305271	yes
ugt-28	C10H11.4	WBGene00015693	chrI	chrI:4727301-4730367	3.14314	109.269	5.11954	2.02e-08	yes
xpo-2	Y48G1A.5	WBGene00002079	chrI	chrI:318546-323353	18.6463	82.0717	2.13799	0.00437605	yes
yop-1	Y71F9B.3	WBGene00022127	chrI	chrI:2730003-2731456	60.601	348.108	2.52212	0.000119783	yes

## Sheet: Truseq_Starved_WT-L1_vs_nos-L1
test_id	gene_ID	Wormbase ID	locus	locus.1	wild-type L1 PGCs FPKM	nos-1/2 L1 PGCs FPKM	log2.fold_change.	q_value	significant
2L52.1	2L52.1	WBGene00007063	chrII	chrII:1866-4663	2.90788	14.2358	2.29148	0.0249272	yes
2RSSE.1	2RSSE.1	WBGene00007064	chrII	chrII:15268135-15273238	0.164037	3.31826	4.33833	0.0165579	yes
AC3.5	AC3.5	WBGene00007071	chrV	chrV:10388446-10393481	0.107222	1.78896	4.06044	0.00551766	yes
AH9.1	AH9.1	WBGene00014998	chrX	chrX:2243593-2247000	0.683697	13.9047	4.34607	0.000215623	yes
T16G12.1	T16G12.1	WBGene00011803	chrIII	chrIII:10040099-10049690	0.206579	1.22334	2.56606	0.031522	yes
B0001.2	B0001.2	WBGene00007087	chrIV	chrIV:12146471-12150953	355.179	86.3963	-2.03951	0.0141132	yes
B0001.6	B0001.6	WBGene00007091	chrIV	chrIV:12156815-12164244	1.93644	18.7782	3.27758	0.000119345	yes
B0019.2	B0019.2	WBGene00007094	chrI	chrI:12773648-12782235	92.8533	25.2916	-1.87629	0.0226497	yes
B0041.5	B0041.5	WBGene00015009	chrI	chrI:4648277-4650771	222.667	68.0358	-1.71052	0.0400117	yes
B0205.13	B0205.13	WBGene00044644	chrI	chrI:10727739-10728784	3.91208	75.739	4.27503	0.000108133	yes
B0228.6	B0228.6	WBGene00015063	chrII	chrII:7754514-7755104	1.11632	25.6307	4.52105	0.00240847	yes
B0272.3	B0272.3	WBGene00007129	chrX	chrX:9431372-9432648	3.60519	35.7896	3.31139	0.000637728	yes
B0284.2	B0284.2	WBGene00007132	chrIII	chrIII:4381955-4384113	5.54971	61.1522	3.46192	2.91e-05	yes
B0284.4	B0284.4	WBGene00007134	chrIII	chrIII:4384758-4387729	0.0401408	4.16248	6.69623	0.0345451	yes
B0303.11	B0303.11	WBGene00015131	chrIII	chrIII:8703225-8710031	0.320361	2.64726	3.04673	0.0158637	yes
B0303.7	B0303.7	WBGene00015128	chrIII	chrIII:8693556-8699374	1.37332	15.8751	3.53103	0.000903635	yes
B0304.4	B0304.4	WBGene00015136	chrII	chrII:4522470-4523219	202.823	62.058	-1.70853	0.0375844	yes
B0393.4	B0393.4	WBGene00007169	chrIII	chrIII:4759728-4763574	0.154791	1.34879	3.12328	0.0450152	yes
B0393.5	B0393.5	WBGene00007170	chrIII	chrIII:4769041-4778021	0.175274	4.03489	4.52485	0.000442216	yes
B0395.3	B0395.3	WBGene00007175	chrX	chrX:16034990-16039442	0.167695	4.40167	4.71414	0.00124999	yes
B0416.5	B0416.5	WBGene00015181	chrX	chrX:9268574-9270794	2.67923	141.847	5.72637	2.32e-07	yes
B0507.10	B0507.10	WBGene00015227	chrV	chrV:8758797-8760469	0.315322	45.3663	7.16865	1.19e-07	yes
B0507.2	B0507.2	WBGene00015219	chrV	chrV:8774309-8776459	2.02486	41.5805	4.36001	7.03e-07	yes
B0507.6	B0507.6	WBGene00015223	chrV	chrV:8746135-8753044	0.0237976	32.5091	10.4158	7.04e-06	yes
B0507.7	B0507.7	WBGene00015224	chrV	chrV:8755874-8758696	0.052311	11.3598	7.76261	0.00294523	yes
B0507.8	B0507.8	WBGene00015225	chrV	chrV:8760664-8762730	0.477227	94.1234	7.62373	2.39e-08	yes
B0511.11	B0511.11	WBGene00015236	chrI	chrI:10648594-10650163	10.5548	38.4902	1.86658	0.042522	yes
C01A2.1	C01A2.1	WBGene00007213	chrI	chrI:13408785-13411440	0.158573	6.14518	5.27624	0.00136405	yes
C01B12.2	C01B12.2	WBGene00015285	chrII	chrII:19537-22158	0.319482	21.634	6.08142	6.24e-06	yes
C01G12.1	C01G12.1	WBGene00007242	chrII	chrII:14573539-14576442	3.70277	20.6072	2.47647	0.00448822	yes
C01G5.9	C01G5.9	WBGene00015311	chrIV	chrIV:6519963-6522207	0.0735132	3.11869	5.40679	0.0304112	yes
C01G6.3	C01G6.3	WBGene00007225	chrII	chrII:9269833-9271207	1.03138	24.0714	4.54468	2.33e-05	yes
C01G6.4	C01G6.4	WBGene00007226	chrII	chrII:9271238-9272982	13.8806	51.7907	1.89962	0.0390801	yes
C01H6.2	C01H6.2	WBGene00007252	chrI	chrI:7204571-7207715	0.127275	5.24479	5.36486	0.00189431	yes
C02B8.6	C02B8.6	WBGene00015324	chrX	chrX:8133125-8136279	2.21845	19.8	3.15788	0.000850457	yes
C02D5.2	C02D5.2	WBGene00015336	chrIII	chrIII:8557254-8559114	0.632254	14.9458	4.56309	0.000751306	yes
C02F12.8	C02F12.8	WBGene00015357	chrX	chrX:3690153-3693225	0.147144	3.52319	4.58158	0.00171642	yes
C03A3.2	C03A3.2	WBGene00007267	chrX	chrX:11262780-11266247	0.12622	4.09576	5.02012	0.0028151	yes
C03A7.13	C03A7.13	WBGene00015371	chrV	chrV:5191113-5192515	4.98453	0.201394	-4.62936	0.00586939	yes
C03B1.7	C03B1.7	WBGene00015378	chrX	chrX:6342119-6345609	0.158708	11.2866	6.1521	1.32e-05	yes
C03H12.1	C03H12.1	WBGene00007284	chrX	chrX:15689389-15696290	0.339362	6.34205	4.22405	0.000251702	yes
C04A11.2	C04A11.2	WBGene00007286	chrX	chrX:13665898-13668742	0.323229	4.19397	3.69769	0.00728506	yes
C04F12.1	C04F12.1	WBGene00007297	chrI	chrI:9673658-9678544	2.12159	51.3323	4.59665	5.7e-09	yes
C05C10.7	C05C10.7	WBGene00007334	chrII	chrII:9938052-9938903	284.359	67.4282	-2.07629	0.0157807	yes
C05D11.5	C05D11.5	WBGene00015483	chrIII	chrIII:6409988-6411506	0.925552	10.5255	3.50744	0.0120495	yes
C05D9.3	C05D9.3	WBGene00015472	chrX	chrX:1111899-1116791	0.293619	4.35199	3.88966	0.00679235	yes
C05E11.3	C05E11.3	WBGene00015494	chrX	chrX:4579479-4585638	0.0826625	9.72468	6.87827	0.0284702	yes
C05G5.2	C05G5.2	WBGene00007348	chrX	chrX:14747250-14750321	0.077924	2.48573	4.99546	0.00594419	yes
C05G5.3	C05G5.3	WBGene00007349	chrX	chrX:14750787-14751942	0.367742	4.96673	3.75553	0.048815	yes
C05G5.4	C05G5.4	WBGene00007350	chrX	chrX:14753956-14760763	1.3335	52.1365	5.289	6.36e-09	yes
C06A5.6	C06A5.6	WBGene00015504	chrI	chrI:5983231-5985871	232.86	68.4152	-1.76707	0.0405888	yes
C06A6.2	C06A6.2	WBGene00015507	chrIV	chrIV:7846629-7854107	0.382998	12.7001	5.05135	7.72e-05	yes
C06B3.6	C06B3.6	WBGene00007365	chrV	chrV:13908118-13909499	5.16048	38.0799	2.88345	0.000708498	yes
C06B8.7	C06B8.7	WBGene00007372	chrV	chrV:15498724-15511394	0.525638	3.87775	2.88308	0.00100575	yes
C06C3.3	C06C3.3	WBGene00007374	chrII	chrII:9369118-9372312	0.804205	5.14426	2.67733	0.0184944	yes
C06C3.8	C06C3.8	WBGene00007378	chrII	chrII:9386524-9390841	0.584686	3.78948	2.69627	0.0426623	yes
C06E2.5	C06E2.5	WBGene00015529	chrX	chrX:8857004-8857901	0.160457	11.2922	6.137	0.0410407	yes
C06E4.8	C06E4.8	WBGene00015537	chrIV	chrIV:7284207-7285509	0.467669	140.164	8.22742	2.81e-09	yes
C06G3.5	C06G3.5	WBGene00015551	chrIV	chrIV:7024199-7028110	2.94884	29.3565	3.31546	0.00519721	yes
C06G3.6	C06G3.6	WBGene00015552	chrIV	chrIV:7017614-7020191	6.93571	41.2044	2.57068	0.0013293	yes
C06G4.5	C06G4.5	WBGene00015559	chrIII	chrIII:7990723-7996373	0.177878	3.78317	4.41063	0.00918827	yes
C07A9.12	C07A9.12	WBGene00043994	chrIII	chrIII:9725200-9727455	0.423142	10.311	4.6069	0.00354153	yes
C07A9.13	C07A9.13	WBGene00044227	chrIII	chrIII:9679613-9681185	0.771602	5.65952	2.87475	0.046018	yes
C07A9.9	C07A9.9	WBGene00007405	chrIII	chrIII:9663209-9667445	3.72767	15.3892	2.04557	0.0487471	yes
C07D8.6	C07D8.6	WBGene00015565	chrX	chrX:7341462-7342730	1.03752	89.1866	6.42562	1.71e-10	yes
C07E3.6	C07E3.6	WBGene00007417	chrII	chrII:10367851-10369537	0.847807	6.6928	2.9808	0.0242358	yes
C07G1.2	C07G1.2	WBGene00015571	chrIV	chrIV:8206599-8210823	0.11123	2.76823	4.63735	0.0344899	yes
C08A9.6	C08A9.6	WBGene00015586	chrX	chrX:17094229-17096463	0.128753	3.43441	4.73739	0.0271641	yes
C08E8.4	C08E8.4	WBGene00007440	chrV	chrV:18371817-18373448	0.940535	9.35584	3.31431	0.0163768	yes
C08F8.9	C08F8.9	WBGene00007449	chrIV	chrIV:11177264-11178574	767.228	207.95	-1.88342	0.0382602	yes
C08G9.2	C08G9.2	WBGene00015620	chrIV	chrIV:7664165-7672868	0.0670462	0.655957	3.29037	0.0343034	yes
C09B7.2	C09B7.2	WBGene00015621	chrX	chrX:2668189-2670582	0.131234	24.0693	7.51891	0.00354627	yes
C09D4.2	C09D4.2	WBGene00015633	chrI	chrI:5491476-5493188	0.49318	11.864	4.58833	0.00204252	yes
C09E7.4	C09E7.4	WBGene00015638	chrIII	chrIII:6534413-6536942	3.40089	19.3936	2.51159	0.00387277	yes
C09E7.5	C09E7.5	WBGene00015639	chrIII	chrIII:6538065-6541259	1.17204	5.63034	2.2642	0.0481797	yes
C09F9.3	C09F9.3	WBGene00007480	chrII	chrII:14721273-14727974	1.12418	5.40612	2.26572	0.0451079	yes
C09G5.8	C09G5.8	WBGene00007490	chrII	chrII:10718332-10729193	0.342835	2.59838	2.92203	0.00626012	yes
C09G9.5	C09G9.5	WBGene00007495	chrIV	chrIV:8886514-8888589	0.405497	9.91417	4.61173	0.0100341	yes
C10A4.1	C10A4.1	WBGene00015662	chrX	chrX:7415793-7418582	0.296469	11.537	5.28225	0.000101122	yes
C10E2.6	C10E2.6	WBGene00015676	chrX	chrX:16767106-16770427	0.271785	85.7221	8.30106	0	yes
C10G6.1	C10G6.1	WBGene00015680	chrIV	chrIV:5820358-5830189	4.30878	25.9651	2.59122	0.00296938	yes
C11D2.4	C11D2.4	WBGene00015702	chrIV	chrIV:6155481-6156885	137.102	38.0758	-1.8483	0.0249641	yes
C11D9.1	C11D9.1	WBGene00015704	chrI	chrI:4422032-4426138	0.437803	6.72786	3.94179	0.00308787	yes
C11E4.6	C11E4.6	WBGene00007520	chrX	chrX:9610505-9616967	0.100888	1.89841	4.23397	0.0022302	yes
C11H1.2	C11H1.2	WBGene00007528	chrX	chrX:14304877-14307697	0.215865	23.3893	6.75958	5.09e-06	yes
C11H1.3	C11H1.3	WBGene00007529	chrX	chrX:14308182-14311613	0.400619	13.6223	5.08759	1.66e-05	yes
C11H1.8	C11H1.8	WBGene00007532	chrX	chrX:14295751-14296586	0.360592	85.6671	7.89223	3.99e-06	yes
C13C4.4	C13C4.4	WBGene00007548	chrV	chrV:12109213-12110959	0.53941	7.51405	3.80014	0.00765203	yes
C14A11.9	C14A11.9	WBGene00050944	chrX	chrX:2807907-2809623	0.232685	5.33069	4.51787	0.0243601	yes
C14F11.1	C14F11.1	WBGene00015778	chrX	chrX:6240918-6242670	1.52591	120.052	6.29784	1.81e-11	yes
C15B12.6	C15B12.6	WBGene00015787	chrX	chrX:6497882-6499799	0.189003	16.8521	6.47838	0.000769777	yes
C15C7.1	C15C7.1	WBGene00015789	chrX	chrX:3164514-3165640	0.386527	15.0987	5.28771	0.00247468	yes
C15C7.7	C15C7.7	WBGene00015793	chrX	chrX:3165785-3170498	1.73911	31.8872	4.19656	1.49e-05	yes
C15F1.2	C15F1.2	WBGene00015795	chrII	chrII:6979963-6988587	0.659856	6.14124	3.21831	0.00204252	yes
C15H11.8	C15H11.8	WBGene00007616	chrV	chrV:14422709-14423338	173.003	35.844	-2.271	0.00305101	yes
C15H9.4	C15H9.4	WBGene00015800	chrX	chrX:6101181-6105335	0.729862	27.679	5.24503	1.19e-06	yes
C15H9.5	C15H9.5	WBGene00015801	chrX	chrX:6093250-6097529	0.376255	6.56985	4.12608	0.000297039	yes
C16C8.12	C16C8.12	WBGene00015850	chrII	chrII:3452733-3453605	82.2257	23.2504	-1.82233	0.0251275	yes
C16H3.3	C16H3.3	WBGene00015868	chrX	chrX:17601553-17609972	0.504409	4.04059	3.0019	0.0088296	yes
C17E4.2	C17E4.2	WBGene00007642	chrI	chrI:9410606-9416695	0.802824	7.35268	3.19511	0.00123664	yes
C17E4.3	C17E4.3	WBGene00007643	chrI	chrI:9416892-9418866	70.9167	19.1646	-1.88768	0.0216722	yes
C17E7.9	C17E7.9	WBGene00015903	chrV	chrV:3889367-3890846	1.8347	18.1619	3.3073	0.00526049	yes
C17G1.5	C17G1.5	WBGene00007652	chrX	chrX:9941571-9944715	1.05054	14.4113	3.778	0.000489758	yes
C17H1.10	C17H1.10	WBGene00044237	chrI	chrI:13133636-13136145	0.181013	6.45654	5.15659	0.0107108	yes
C17H1.14	C17H1.14	WBGene00044709	chrI	chrI:13107480-13109611	0.16886	7.32148	5.43823	0.0142998	yes
C17H1.3	C17H1.3	WBGene00007656	chrI	chrI:13104241-13106287	0.15029	8.92947	5.89276	0.00991245	yes
C17H1.4	C17H1.4	WBGene00007657	chrI	chrI:13110522-13112419	0.13803	5.69338	5.36623	0.0385892	yes
C17H1.5	C17H1.5	WBGene00007658	chrI	chrI:13113625-13116423	0.417826	18.827	5.49375	0.000869196	yes
C17H11.2	C17H11.2	WBGene00015922	chrX	chrX:8169879-8172818	0.830982	7.42509	3.15952	0.0011992	yes
C17H12.13	C17H12.13	WBGene00015938	chrIV	chrIV:6770798-6779848	100.572	20.534	-2.29214	0.0141824	yes
C18B12.4	C18B12.4	WBGene00007666	chrX	chrX:15036626-15040532	0.579381	15.899	4.77828	6.24e-06	yes
C18B12.6	C18B12.6	WBGene00007668	chrX	chrX:15003997-15007238	0.444969	40.1103	6.49412	4.93e-09	yes
C18C4.5	C18C4.5	WBGene00015966	chrV	chrV:5550300-5557265	0.187641	1.70446	3.18326	0.029724	yes
C18E9.7	C18E9.7	WBGene00007687	chrII	chrII:8978517-8982616	0.0431783	2.69796	5.96542	0.00933053	yes
C18F3.4	C18F3.4	WBGene00044508	chrIV	chrIV:8083946-8086638	1.46221	7.6497	2.38725	0.0498235	yes
C23F12.4	C23F12.4	WBGene00016009	chrX	chrX:9387376-9389130	1.58932	18.9142	3.57299	0.00162443	yes
C23G10.5	C23G10.5	WBGene00016012	chrIII	chrIII:6191057-6192029	2.12569	13.3819	2.65428	0.0213354	yes
C23H4.6	C23H4.6	WBGene00007694	chrX	chrX:12235552-12240713	0.0322744	1.19832	5.21448	0.0216722	yes
C24A1.2	C24A1.2	WBGene00016029	chrIII	chrIII:688733-715835	1.0695	22.2525	4.37896	3.62e-05	yes
C24H10.2	C24H10.2	WBGene00016068	chrX	chrX:5064612-5066264	0.323905	7.80022	4.58987	0.00421463	yes
C25A11.2	C25A11.2	WBGene00016087	chrX	chrX:9114311-9116820	0.135219	12.3324	6.51101	7.1e-06	yes
C25G4.11	C25G4.11	WBGene00007737	chrIV	chrIV:12468646-12470216	0.567574	64.1149	6.81971	1.18e-08	yes
C25G4.6	C25G4.6	WBGene00007733	chrIV	chrIV:12455093-12456152	3.53551	26.7987	2.92217	0.00233181	yes
C25G4.7	C25G4.7	WBGene00007734	chrIV	chrIV:12456936-12458538	1.46888	30.4987	4.37596	2.13e-05	yes
C25G6.5	C25G6.5	WBGene00016110	chrX	chrX:1251019-1255610	0.117524	3.13071	4.73547	0.016752	yes
C26H9A.2	C26H9A.2	WBGene00007752	chrIV	chrIV:12653465-12674749	1.0401	15.7373	3.91939	3.18e-07	yes
C27C12.1	C27C12.1	WBGene00007771	chrX	chrX:14849246-14853685	8.09495	47.4087	2.55006	0.00296938	yes
C27C12.4	C27C12.4	WBGene00007774	chrX	chrX:14854061-14856449	1.47046	20.9373	3.83173	4.43e-05	yes
C27D8.2	C27D8.2	WBGene00007778	chrIV	chrIV:12712764-12714732	0.109937	6.02671	5.77662	0.0034459	yes
C28C12.1	C28C12.1	WBGene00016177	chrIV	chrIV:8501468-8502925	5.40687	23.5533	2.12306	0.043526	yes
C28G1.5	C28G1.5	WBGene00016190	chrX	chrX:8826578-8828479	0.160328	26.3579	7.36106	0.000777291	yes
C28G1.6	C28G1.6	WBGene00016191	chrX	chrX:8829879-8831141	0.0637423	6.58899	6.69166	0.0271641	yes
C29E4.13	C29E4.13	WBGene00043051	chrIII	chrIII:7926935-7928669	65.9396	17.2963	-1.93068	0.036125	yes
C29F7.3	C29F7.3	WBGene00007812	chrX	chrX:13418794-13419836	2.35615	16.3619	2.79584	0.0155243	yes
C29F9.1	C29F9.1	WBGene00016216	chrIII	chrIII:132423-134369	6.03782	35.036	2.53674	0.00540142	yes
C29F9.12	C29F9.12	WBGene00016226	chrIII	chrIII:120490-124640	804.542	112.736	-2.83522	0.000674281	yes
C29G2.1	C29G2.1	WBGene00016229	chrV	chrV:2591173-2591756	0.503858	56.8982	6.81922	0.000826593	yes
C30F12.1	C30F12.1	WBGene00016260	chrI	chrI:6954441-6961138	0.303755	4.30058	3.82355	0.00192833	yes
C30F12.5	C30F12.5	WBGene00016264	chrI	chrI:6992226-6999570	2.32757	37.1524	3.99656	6.92e-06	yes
C30F8.3	C30F8.3	WBGene00016259	chrI	chrI:5096603-5100497	0.628056	8.96312	3.83504	0.010342	yes
C30G7.3	C30G7.3	WBGene00044177	chrV	chrV:14942119-14945651	1.27326	17.3788	3.77073	0.000531636	yes
C31B8.4	C31B8.4	WBGene00016281	chrV	chrV:2896634-2898415	0.0582521	7.86957	7.07783	0.0127564	yes
C31C9.2	C31C9.2	WBGene00007836	chrII	chrII:13636912-13638415	0.419985	9.43403	4.48946	0.00110945	yes
C31E10.5	C31E10.5	WBGene00007846	chrX	chrX:13991426-13995765	11.5255	40.0544	1.79713	0.0344899	yes
C31E10.6	C31E10.6	WBGene00007847	chrX	chrX:13996237-13999220	1.066	13.6073	3.6741	0.000103573	yes
C31H5.4	C31H5.4	WBGene00007855	chrI	chrI:9042262-9042592	11.3028	94.0951	3.05744	0.00309236	yes
C32D5.12	C32D5.12	WBGene00016319	chrII	chrII:6356405-6358973	0.933501	9.5385	3.35304	0.00307028	yes
C32D5.6	C32D5.6	WBGene00016314	chrII	chrII:6331881-6333934	0.0958305	2.39006	4.64042	0.0141243	yes
C32E12.4	C32E12.4	WBGene00016330	chrI	chrI:5230565-5241917	1.33351	6.79194	2.3486	0.00972451	yes
C33A12.7	C33A12.7	WBGene00007886	chrIV	chrIV:9506915-9508760	3.15241	50.3434	3.99728	1.58e-05	yes
C33D9.5	C33D9.5	WBGene00007899	chrIV	chrIV:8778373-8780859	0.35153	10.4821	4.89813	5.23e-05	yes
C33D9.6	C33D9.6	WBGene00007900	chrIV	chrIV:8775419-8778132	1.04879	19.4781	4.21506	9.08e-06	yes
C33D9.8	C33D9.8	WBGene00007901	chrIV	chrIV:8783363-8786637	0.960526	20.7947	4.43625	6.03e-06	yes
C33D9.9	C33D9.9	WBGene00007902	chrIV	chrIV:8773938-8775304	0.850846	9.49698	3.4805	0.00531574	yes
C33G3.6	C33G3.6	WBGene00007906	chrX	chrX:14080320-14084256	0.368155	5.76063	3.96784	0.000814984	yes
C34B2.10	C34B2.10	WBGene00016395	chrI	chrI:10682459-10683139	197.997	60.2163	-1.71725	0.0410407	yes
C34B2.11	C34B2.11	WBGene00016396	chrI	chrI:10691333-10696772	1.66916	8.88009	2.41145	0.0456815	yes
C34D4.1	C34D4.1	WBGene00016397	chrIV	chrIV:7156887-7160097	2.33755	13.1714	2.49434	0.0100591	yes
C34F11.3	C34F11.3	WBGene00016415	chrII	chrII:5203302-5210953	1.59049	11.9483	2.90926	0.0239605	yes
C34F6.7	C34F6.7	WBGene00007941	chrX	chrX:11210050-11215405	3.71467	19.7509	2.41061	0.0050585	yes
C34F6.8	C34F6.8	WBGene00007942	chrX	chrX:11215630-11222582	0.794723	33.2945	5.38869	0.000385004	yes
C34F6.9	C34F6.9	WBGene00007943	chrX	chrX:11215630-11222582	0.284252	30.7379	6.7567	1.63e-08	yes
C35B8.3	C35B8.3	WBGene00016438	chrX	chrX:9213893-9216797	1.04512	8.88883	3.08832	0.00741879	yes
C35C5.3	C35C5.3	WBGene00007955	chrX	chrX:11545049-11547497	2.03099	65.7233	5.01615	0.000962194	yes
C35C5.6	C35C5.6	WBGene00007956	chrX	chrX:11563921-11569624	0.389186	19.8602	5.67328	1.42e-09	yes
C35D10.12	C35D10.12	WBGene00016448	chrIII	chrIII:4872530-4874715	0.241877	3.10049	3.68015	0.0427319	yes
C35E7.1	C35E7.1	WBGene00016453	chrI	chrI:10846766-10850093	0.0860667	3.07308	5.15809	0.00315844	yes
C35E7.5	C35E7.5	WBGene00016457	chrI	chrI:10823346-10828443	0.450228	5.78163	3.68275	0.00192446	yes
C35E7.6	C35E7.6	WBGene00016458	chrI	chrI:10817348-10819098	1.17374	11.4401	3.28492	0.00228196	yes
C35E7.8	C35E7.8	WBGene00016460	chrI	chrI:10808595-10810373	222.207	54.7319	-2.02145	0.0114381	yes
C36B1.9	C36B1.9	WBGene00007976	chrI	chrI:8743842-8746919	6.37602	28.6813	2.16938	0.0102649	yes
C36B7.6	C36B7.6	WBGene00016469	chrX	chrX:7097419-7100297	5.46282	18.9368	1.79348	0.0462495	yes
C36C9.1	C36C9.1	WBGene00016485	chrX	chrX:1682950-1686378	4.59904	24.8984	2.43665	0.00254622	yes
C36E6.1	C36E6.1	WBGene00016489	chrX	chrX:17434371-17438007	3.98551	23.1139	2.53592	0.0248949	yes
C36F7.5	C36F7.5	WBGene00007986	chrI	chrI:9574794-9576016	1.49336	10.2773	2.78282	0.0134333	yes
C37E2.1	C37E2.1	WBGene00007993	chrX	chrX:14170793-14173994	1.38751	10.9483	2.98014	0.00193951	yes
C37H5.2	C37H5.2	WBGene00016506	chrV	chrV:4847725-4849622	0.495241	5.96574	3.5905	0.0098474	yes
C37H5.3	C37H5.3	WBGene00016507	chrV	chrV:4844670-4846939	1.32961	20.5237	3.94821	0.00434315	yes
C38C3.3	C38C3.3	WBGene00016512	chrV	chrV:1496172-1497942	2.41384	17.1183	2.82614	0.0102522	yes
C38H2.2	C38H2.2	WBGene00008019	chrIII	chrIII:10381678-10385215	0.557807	6.22866	3.48108	0.00233168	yes
C41D11.6	C41D11.6	WBGene00016565	chrI	chrI:4460146-4462705	47.3715	3.60449	-3.71615	2.99e-07	yes
C41H7.3	C41H7.3	WBGene00016573	chrII	chrII:3005848-3007500	2.64512	22.2013	3.06924	0.00168376	yes
C41H7.4	C41H7.4	WBGene00016574	chrII	chrII:3003984-3005527	5.53785	26.1027	2.2368	0.0151903	yes
C41H7.5	C41H7.5	WBGene00016575	chrII	chrII:3002520-3003803	1.69014	19.0717	3.49621	0.000336884	yes
C41H7.6	C41H7.6	WBGene00016576	chrII	chrII:3000827-3002414	2.37296	18.8467	2.98955	0.0015404	yes
C43E11.5	C43E11.5	WBGene00016605	chrI	chrI:4237034-4238607	0.758055	18.4315	4.60373	8.83e-05	yes
C43H6.1	C43H6.1	WBGene00016614	chrX	chrX:2409703-2412959	2.33024	15.376	2.72213	0.00659838	yes
C43H6.3	C43H6.3	WBGene00016616	chrX	chrX:2407459-2409557	0.847607	9.46595	3.48128	0.0183878	yes
C43H6.4	C43H6.4	WBGene00016617	chrX	chrX:2404016-2407353	0.524929	24.2625	5.53046	6.17e-08	yes
C43H6.7	C43H6.7	WBGene00016620	chrX	chrX:2398804-2402044	1.50973	17.9141	3.56873	0.000567762	yes
C44B7.12	C44B7.12	WBGene00016632	chrII	chrII:6891669-6893591	145.18	39.0696	-1.89373	0.021887	yes
C44B7.7	C44B7.7	WBGene00016629	chrII	chrII:6879220-6880123	0.503672	8.28655	4.04021	0.0264325	yes
C44B9.2	C44B9.2	WBGene00008079	chrIII	chrIII:10875359-10877915	22.5981	5.70679	-1.98545	0.0238206	yes
C44C1.2	C44C1.2	WBGene00016642	chrX	chrX:957882-960558	0.833318	27.0753	5.02197	1.79e-06	yes
C44C10.4	C44C10.4	WBGene00008085	chrX	chrX:11693397-11695673	0.545753	6.70548	3.61902	0.00336529	yes
C44C10.5	C44C10.5	WBGene00008086	chrX	chrX:11691040-11692388	3.92598	21.2196	2.43427	0.0118135	yes
C44H4.4	C44H4.4	WBGene00008094	chrX	chrX:14581584-14589017	0.188649	4.05468	4.42582	0.00266617	yes
C44H9.4	C44H9.4	WBGene00008099	chrV	chrV:12835690-12839766	0.0847907	21.2481	7.96921	1.5e-06	yes
C44H9.5	C44H9.5	WBGene00008100	chrV	chrV:12848648-12849781	2.03007	17.5617	3.11283	0.00715959	yes
C44H9.6	C44H9.6	WBGene00008101	chrV	chrV:12842492-12845313	0.0706768	3.4229	5.59784	0.00515522	yes
C44H9.8	C44H9.8	WBGene00008103	chrV	chrV:12846901-12848523	1.43133	16.2264	3.50291	0.00159977	yes
C45G9.10	C45G9.10	WBGene00016681	chrIII	chrIII:5056823-5061851	0.0585637	2.77026	5.56387	0.0226497	yes
C45G9.2	C45G9.2	WBGene00016674	chrIII	chrIII:5069030-5070380	113.507	29.0877	-1.9643	0.0131832	yes
C45G9.7	C45G9.7	WBGene00016678	chrIII	chrIII:5046133-5047106	6.3899	52.9465	3.05067	0.0021963	yes
C46A5.6	C46A5.6	WBGene00016702	chrIV	chrIV:7760117-7763830	1020.64	214.468	-2.25064	0.00558163	yes
C46C2.2	C46C2.2	WBGene00008110	chrIV	chrIV:9216935-9220157	3.60833	37.0092	3.35848	5.11e-05	yes
C46C2.7	C46C2.7	WBGene00045078	chrIV	chrIV:9195614-9196046	97.3625	24.5127	-1.98984	0.0193803	yes
C46F11.6	C46F11.6	WBGene00008121	chrIII	chrIII:3667332-3670418	1.51054	9.53601	2.65832	0.0292339	yes
C46G7.5	C46G7.5	WBGene00044502	chrIV	chrIV:6010282-6010870	32.4495	7.23332	-2.16547	0.0183931	yes
C46H11.2	C46H11.2	WBGene00016728	chrI	chrI:5050051-5052526	0.0795803	8.1597	6.67996	0.00205311	yes
C46H3.2	C46H3.2	WBGene00016725	chrX	chrX:1211764-1220024	0.161535	1.89702	3.55382	0.0485066	yes
C47D12.4	C47D12.4	WBGene00008138	chrII	chrII:11681760-11682742	0.476596	6.12416	3.68368	0.0179444	yes
C47E12.6	C47E12.6	WBGene00008150	chrIV	chrIV:9983271-9989594	0.175794	1.894	3.42948	0.0385941	yes
C48B4.8	C48B4.8	WBGene00008171	chrIII	chrIII:9559819-9561151	109.279	29.5085	-1.88882	0.0251275	yes
C48B6.4	C48B6.4	WBGene00016742	chrI	chrI:6889252-6891444	0.0620862	2.99163	5.59051	0.00985279	yes
C48E7.1	C48E7.1	WBGene00016749	chrI	chrI:6260250-6264523	0.398479	17.0646	5.42035	0.000395518	yes
C48E7.2	C48E7.2	WBGene00016750	chrI	chrI:6255036-6257621	205.425	62.0774	-1.72647	0.0406952	yes
C48E7.6	C48E7.6	WBGene00016751	chrI	chrI:6239541-6250069	0.124625	1.09214	3.1315	0.0228496	yes
C49A9.10	C49A9.10	WBGene00016764	chrIV	chrIV:6205873-6206318	179.896	52.5879	-1.77436	0.0434148	yes
C49C3.5	C49C3.5	WBGene00008195	chrIV	chrIV:17329167-17330660	0.811909	10.7131	3.72191	0.00715959	yes
C49C8.2	C49C8.2	WBGene00016766	chrIV	chrIV:8648652-8653664	0.279699	33.8156	6.91767	0.0301508	yes
C49F5.6	C49F5.6	WBGene00008210	chrX	chrX:11988245-11991199	0.416488	131.534	8.30295	0	yes
C49G7.1	C49G7.1	WBGene00016780	chrV	chrV:4056149-4059051	0.633371	7.47165	3.5603	0.00152252	yes
C49G7.10	C49G7.10	WBGene00016788	chrV	chrV:4040393-4041989	1.33169	13.1258	3.30108	0.00814543	yes
C50C3.1	C50C3.1	WBGene00016799	chrIII	chrIII:8191747-8193776	39.4184	10.5102	-1.90709	0.0195579	yes
C50C3.2	C50C3.2	WBGene00016800	chrIII	chrIII:8181866-8189305	0.147382	1.54471	3.38971	0.00399661	yes
C50D2.6	C50D2.6	WBGene00016809	chrII	chrII:84433-87758	0.103496	2.26245	4.45024	0.0451079	yes
C50F2.5	C50F2.5	WBGene00016839	chrI	chrI:3895794-3897403	0.361469	9.84431	4.76735	0.00153562	yes
C50F2.8	C50F2.8	WBGene00016841	chrI	chrI:3901434-3905203	0.543868	5.36098	3.30117	0.00985705	yes
C50F7.6	C50F7.6	WBGene00016846	chrIV	chrIV:7720563-7723188	2.64865	12.3526	2.22149	0.0267498	yes
C52B9.4	C52B9.4	WBGene00016867	chrX	chrX:4260627-4264528	1.45986	35.2198	4.59249	1.09e-07	yes
C52D10.12	C52D10.12	WBGene00016879	chrIV	chrIV:17197871-17206807	0.349762	3.25053	3.21623	0.00626003	yes
C52E12.6	C52E12.6	WBGene00016890	chrII	chrII:7022884-7024888	15.7255	3.87449	-2.02102	0.0320157	yes
C52E4.5	C52E4.5	WBGene00008258	chrV	chrV:11982885-11985465	1.12542	6.83624	2.60274	0.0114868	yes
C53A3.2	C53A3.2	WBGene00016892	chrV	chrV:5762520-5763829	1.14086	6.66796	2.54713	0.0348771	yes
C53A5.11	C53A5.11	WBGene00008269	chrV	chrV:14562549-14564624	0.034128	5.60491	7.35959	0.022176	yes
C53A5.13	C53A5.13	WBGene00008270	chrV	chrV:14546905-14554525	11.8384	44.2372	1.90178	0.0251297	yes
C53A5.5	C53A5.5	WBGene00008265	chrV	chrV:14539907-14542878	0.198771	11.0193	5.79278	5.87e-05	yes
C53A5.9	C53A5.9	WBGene00008267	chrV	chrV:14557022-14558903	0.114122	54.8803	8.90957	1.48e-06	yes
C53D6.6	C53D6.6	WBGene00008283	chrIV	chrIV:9027675-9032636	0.615924	47.7725	6.27728	2.5e-10	yes
C53H9.3	C53H9.3	WBGene00044746	chrI	chrI:1832116-1832423	280.532	84.6555	-1.72849	0.0481636	yes
C54D10.12	C54D10.12	WBGene00044787	chrV	chrV:12434031-12436933	0.0162698	17.4678	10.0683	0.00716913	yes
C54D10.8	C54D10.8	WBGene00008302	chrV	chrV:12445164-12446647	1.2963	62.2138	5.58476	1.6e-06	yes
C54D10.9	C54D10.9	WBGene00008303	chrV	chrV:12447479-12448642	0.255846	12.0256	5.55469	0.0148413	yes
C54G4.4	C54G4.4	WBGene00008314	chrI	chrI:7996722-8003174	0.0634048	1.29923	4.35692	0.045007	yes
C54G7.2	C54G7.2	WBGene00016934	chrX	chrX:5519840-5522791	0.491737	12.8951	4.71279	2.67e-05	yes
C55C3.3	C55C3.3	WBGene00016953	chrIV	chrIV:5685281-5688249	3.19226	27.788	3.12181	0.000410498	yes
C55C3.4	C55C3.4	WBGene00016954	chrIV	chrIV:5676200-5678133	0.0268764	3.26849	6.92614	0.0462244	yes
C55C3.6	C55C3.6	WBGene00016956	chrIV	chrIV:5683203-5684661	1.66806	35.5832	4.41496	3.72e-05	yes
C55C3.7	C55C3.7	WBGene00043065	chrIV	chrIV:5678835-5682009	0.470123	28.8425	5.93901	0.000645959	yes
C56C10.10	C56C10.10	WBGene00016966	chrII	chrII:6592469-6594218	98.7608	18.2923	-2.4327	0.00108923	yes
C56C10.12	C56C10.12	WBGene00016968	chrII	chrII:6603408-6609324	2.60832	18.9758	2.86297	0.000350837	yes
CC8.1	CC8.1	WBGene00016986	chrIV	chrIV:3638349-3639815	0.442582	7.5578	4.09395	0.0447947	yes
D1005.1	D1005.1	WBGene00016995	chrX	chrX:1479536-1484393	0.329085	37.9628	6.84998	1.69e-12	yes
D1005.3	D1005.3	WBGene00016997	chrX	chrX:1452689-1454023	1.81624	14.4747	2.99451	0.00220098	yes
D1007.15	D1007.15	WBGene00017010	chrI	chrI:4557664-4563695	0.673762	6.668	3.30694	0.000391891	yes
D1025.1	D1025.1	WBGene00008353	chrX	chrX:14520692-14522579	1.74801	30.5226	4.12609	1.11e-05	yes
D1025.10	D1025.10	WBGene00044134	chrX	chrX:14516808-14519005	2.18671	24.4424	3.48255	0.000344083	yes
D1044.2	D1044.2	WBGene00017028	chrIII	chrIII:5526030-5535439	0.305014	4.23886	3.79673	0.00413049	yes
D1065.3	D1065.3	WBGene00017035	chrV	chrV:4059816-4062078	0.736232	5.45961	2.89056	0.0149103	yes
D2024.10	D2024.10	WBGene00044505	chrIV	chrIV:7251435-7251738	90.424	15.308	-2.56242	0.0451079	yes
D2092.4	D2092.4	WBGene00017065	chrI	chrI:6612144-6615979	0.388018	3.03415	2.96709	0.0459916	yes
D2096.10	D2096.10	WBGene00017077	chrIV	chrIV:8387763-8388431	110.768	28.8547	-1.94067	0.0337729	yes
D2096.5	D2096.5	WBGene00017072	chrIV	chrIV:8359151-8359703	5.76526	33.6806	2.54646	0.0292663	yes
DH11.2	DH11.2	WBGene00008436	chrII	chrII:8012764-8015203	0.658061	11.2631	4.09724	0.000238835	yes
F54F2.9	F54F2.9	WBGene00018836	chrIII	chrIII:8827329-8829206	104.935	31.6599	-1.72877	0.037274	yes
EEED8.15	EEED8.15	WBGene00017143	chrII	chrII:5419230-5421084	9.64571	36.0815	1.9033	0.0403829	yes
EEED8.2	EEED8.2	WBGene00017133	chrII	chrII:5416696-5418342	3.10664	85.578	4.78381	1.17e-07	yes
EGAP2.1	EGAP2.1	WBGene00017147	chrII	chrII:5231410-5235913	0.241542	4.59807	4.25068	0.0415689	yes
F01G10.7	F01G10.7	WBGene00008510	chrIV	chrIV:10239255-10241837	0.303722	14.1278	5.53964	4.85e-05	yes
F01G12.6	F01G12.6	WBGene00017171	chrX	chrX:16399137-16403116	0.250569	7.50999	4.90553	0.000465701	yes
F02C12.1	F02C12.1	WBGene00008515	chrX	chrX:13402023-13406343	0.0994158	3.18529	5.00181	0.00143612	yes
F02E8.4	F02E8.4	WBGene00017177	chrX	chrX:4454102-4457274	0.174461	7.3096	5.38882	3.16e-05	yes
F02E9.7	F02E9.7	WBGene00008531	chrI	chrI:8413253-8416123	251.53	38.3971	-2.71166	0.000177682	yes
F07A11.4	F07A11.4	WBGene00008547	chrII	chrII:11603889-11611465	0.213306	1.68243	2.97955	0.0251297	yes
F07A5.2	F07A5.2	WBGene00008541	chrI	chrI:7352441-7353699	2.41509	10.6531	2.14112	0.0459418	yes
F08A10.1	F08A10.1	WBGene00008570	chrI	chrI:8196052-8208734	0.22586	10.4821	5.53636	0.001837	yes
F08C6.2	F08C6.2	WBGene00017241	chrX	chrX:7570328-7581011	1.25257	21.0894	4.07356	0.00609629	yes
F08F3.9	F08F3.9	WBGene00017265	chrV	chrV:5437269-5439145	5.25405	33.1308	2.65667	0.00304598	yes
F08G12.1	F08G12.1	WBGene00008585	chrX	chrX:11300188-11305809	0.156579	3.67897	4.55434	0.0139452	yes
F08G12.2	F08G12.2	WBGene00008586	chrX	chrX:11298016-11299623	3.936	63.3047	4.00751	1.08e-06	yes
F08G12.5	F08G12.5	WBGene00008588	chrX	chrX:11308838-11310158	0.141327	11.2565	6.31558	0.037274	yes
F08G2.4	F08G2.4	WBGene00008576	chrII	chrII:13830529-13831152	3.56994	28.6078	3.00244	0.00297825	yes
F09C6.13	F09C6.13	WBGene00044183	chrV	chrV:16885051-16885380	0	68.1501	1.79769e+308	0.0371171	yes
F09C8.2	F09C8.2	WBGene00008622	chrX	chrX:16140441-16146952	1.1183	10.8366	3.27654	0.0001858	yes
F09F7.6	F09F7.6	WBGene00017303	chrIII	chrIII:5551281-5552075	8.31522	202.723	4.60761	0.00030613	yes
F09G8.10	F09G8.10	WBGene00044444	chrIII	chrIII:8270718-8272097	0.188656	5.01211	4.73159	0.0312699	yes
F10D11.6	F10D11.6	WBGene00008652	chrI	chrI:8445442-8450988	0.131033	1.78648	3.76911	0.0143637	yes
F10E7.1	F10E7.1	WBGene00017343	chrII	chrII:7126714-7128884	0.266789	2.46483	3.20772	0.0385961	yes
F10E9.4	F10E9.4	WBGene00017356	chrIII	chrIII:8308478-8309603	269.692	84.1946	-1.67952	0.0453112	yes
F10G7.5	F10G7.5	WBGene00017369	chrII	chrII:4693441-4696405	3.23618	16.8719	2.38226	0.00950404	yes
F11C1.1	F11C1.1	WBGene00008690	chrX	chrX:12987287-12989150	7.08831	29.8503	2.07423	0.0419008	yes
F11C1.5	F11C1.5	WBGene00008694	chrX	chrX:12991376-12999567	0.50191	12.2757	4.61224	2.3e-05	yes
F11C3.1	F11C3.1	WBGene00008695	chrI	chrI:14867825-14871354	0.475638	37.3173	6.29384	9.11e-08	yes
F13B9.1	F13B9.1	WBGene00017419	chrX	chrX:8287208-8294448	3.4498	27.8901	3.01517	0.000452507	yes
F13C5.2	F13C5.2	WBGene00017423	chrX	chrX:593959-596289	1.00459	8.48368	3.07808	0.0029082	yes
F13E6.1	F13E6.1	WBGene00008745	chrX	chrX:10675642-10677046	0.627368	5.71218	3.18666	0.0308713	yes
F13E6.3	F13E6.3	WBGene00008747	chrX	chrX:10680564-10682693	0.443192	10.7118	4.59513	0.00596135	yes
F13E6.5	F13E6.5	WBGene00008749	chrX	chrX:10695243-10697772	0.487378	5.29048	3.44029	0.0177012	yes
F13H10.5	F13H10.5	WBGene00008776	chrIV	chrIV:10991017-10994116	0.698177	5.5999	3.00374	0.0143601	yes
F14B4.1	F14B4.1	WBGene00008779	chrI	chrI:9265946-9270912	3.85203	19.2798	2.3234	0.0065309	yes
F14B8.2	F14B8.2	WBGene00017445	chrX	chrX:6904733-6904983	4.85681	250.811	5.69045	0.00220098	yes
F14D2.11	F14D2.11	WBGene00017459	chrII	chrII:3341381-3342074	104.092	22.2193	-2.22798	0.00541651	yes
F14D7.2	F14D7.2	WBGene00008789	chrV	chrV:14291955-14293693	0.0757987	14.2703	7.55662	0.000925298	yes
F14D7.6	F14D7.6	WBGene00008793	chrV	chrV:14301405-14306410	0.132661	3.22992	4.60568	0.0120202	yes
F14E5.4	F14E5.4	WBGene00008802	chrII	chrII:8429907-8432003	0.5351	4.75099	3.15035	0.0143108	yes
F14H3.6	F14H3.6	WBGene00008825	chrV	chrV:16057305-16058872	0.199297	4.48386	4.49175	0.0456365	yes
F15D4.2	F15D4.2	WBGene00008859	chrII	chrII:13216019-13216685	430.399	130.879	-1.71744	0.0373324	yes
F15D4.3	F15D4.3	WBGene00008860	chrII	chrII:13237334-13237837	387.927	110.886	-1.8067	0.0358739	yes
F15H10.7	F15H10.7	WBGene00008874	chrV	chrV:10403181-10406339	0.0478548	2.78141	5.86101	0.0119698	yes
F16B12.4	F16B12.4	WBGene00008880	chrX	chrX:14096100-14098586	2.80001	35.2498	3.65411	0.000278083	yes
F16B12.6	F16B12.6	WBGene00008882	chrX	chrX:14102289-14107836	4.95563	46.7926	3.23914	2.13e-05	yes
F17A2.13	F17A2.13	WBGene00008904	chrX	chrX:12321597-12322925	0.373773	3.38067	3.17707	0.0453094	yes
F17C11.11	F17C11.11	WBGene00008922	chrV	chrV:10937613-10938821	3.312	25.154	2.92502	0.00220098	yes
F17C11.12	F17C11.12	WBGene00008923	chrV	chrV:10932627-10936841	0.471097	8.01362	4.08836	0.00765801	yes
F17C11.17	F17C11.17	WBGene00077761	chrV	chrV:10941430-10943843	0.94078	13.2959	3.82098	0.00555637	yes
F17C8.3	F17C8.3	WBGene00008910	chrIII	chrIII:4731902-4736028	0.391398	2.57625	2.71857	0.0356247	yes
F18A12.7	F18A12.7	WBGene00017556	chrII	chrII:3411427-3414472	0.211842	16.1843	6.25546	9.99e-07	yes
F18C5.10	F18C5.10	WBGene00017563	chrII	chrII:6559238-6561428	0.39728	4.21369	3.40686	0.0148273	yes
F18H3.1	F18H3.1	WBGene00008939	chrX	chrX:13519592-13521466	1.01235	8.21174	3.01997	0.0294059	yes
F18H3.4	F18H3.4	WBGene00008940	chrX	chrX:13529017-13531962	0.865852	7.09848	3.03532	0.0052719	yes
F19B10.1	F19B10.1	WBGene00017583	chrII	chrII:3683179-3684548	1.99701	15.8497	2.98854	0.00439066	yes
F19B10.10	F19B10.10	WBGene00017589	chrII	chrII:3677537-3681418	0.200724	2.08172	3.37449	0.0241274	yes
F19B10.2	F19B10.2	WBGene00017584	chrII	chrII:3675626-3676731	0.250503	5.25976	4.3921	0.0175798	yes
F19B10.4	F19B10.4	WBGene00017586	chrII	chrII:3660086-3662621	0.181328	3.20617	4.14418	0.0129589	yes
F19B10.5	F19B10.5	WBGene00017587	chrII	chrII:3655700-3657735	0.0434458	11.3216	8.02565	0.0370773	yes
F19C6.2	F19C6.2	WBGene00008951	chrX	chrX:10000880-10005285	0.622455	21.8377	5.13271	0.0313719	yes
F19F10.1	F19F10.1	WBGene00017598	chrV	chrV:7562694-7564226	0.0881621	14.2434	7.33592	0.0265406	yes
F20A1.9	F20A1.9	WBGene00017620	chrV	chrV:7049416-7051273	273.596	84.911	-1.68803	0.0474366	yes
F20D1.1	F20D1.1	WBGene00008973	chrX	chrX:14968833-14970203	7.61138	58.2959	2.93716	0.000709995	yes
F20D1.3	F20D1.3	WBGene00008975	chrX	chrX:14976046-14978642	4.04706	30.7506	2.92567	0.000546922	yes
F20D1.9	F20D1.9	WBGene00008979	chrX	chrX:15002025-15003762	0.94474	24.4407	4.69322	4.64e-05	yes
F20G2.3	F20G2.3	WBGene00008987	chrV	chrV:13763063-13768495	0.155737	11.5632	6.21429	0.0217518	yes
F21A10.2	F21A10.2	WBGene00008999	chrX	chrX:10181750-10194317	0.543309	4.49874	3.04968	0.0104942	yes
F21C10.10	F21C10.10	WBGene00017659	chrV	chrV:9095984-9097202	1.01014	9.58947	3.24689	0.00879462	yes
F21F3.2	F21F3.2	WBGene00017672	chrI	chrI:4903437-4905139	0.259261	13.7162	5.72533	6.12e-05	yes
F21F3.3	F21F3.3	WBGene00017673	chrI	chrI:4901974-4903137	50.0514	1106.81	4.46686	1.87e-07	yes
F21F3.4	F21F3.4	WBGene00017674	chrI	chrI:4896003-4897542	259.783	61.2594	-2.08431	0.00814803	yes
F21G4.4	F21G4.4	WBGene00009025	chrX	chrX:9897254-9899418	0.756026	19.7501	4.70728	3.17e-05	yes
F21G4.5	F21G4.5	WBGene00009026	chrX	chrX:9906097-9907747	0.212223	3.61748	4.09133	0.0351363	yes
F21G4.6	F21G4.6	WBGene00009027	chrX	chrX:9908755-9917386	0.365451	5.80643	3.9899	2.02e-05	yes
F22B5.4	F22B5.4	WBGene00009042	chrII	chrII:8449649-8452628	0.143593	221.818	10.5932	4.57e-05	yes
F22B7.9	F22B7.9	WBGene00017698	chrIII	chrIII:8652494-8653826	1.15477	14.014	3.60119	0.00240847	yes
F22B8.7	F22B8.7	WBGene00009049	chrV	chrV:16095203-16097294	0.876345	97.9528	6.80444	2.88e-10	yes
F22D6.11	F22D6.11	WBGene00001643	chrI	chrI:7110238-7112286	0.0427635	3.06269	6.16228	0.0482516	yes
F22D6.12	F22D6.12	WBGene00001644	chrI	chrI:7112916-7115023	0.117118	2.93092	4.64532	0.0251995	yes
F22D6.8	F22D6.8	WBGene00043279	chrI	chrI:7099005-7099403	376.983	94.2161	-2.00045	0.017973	yes
F22E5.13	F22E5.13	WBGene00017711	chrII	chrII:2647700-2649644	0.231938	14.5907	5.97516	0.00022782	yes
F22E5.9	F22E5.9	WBGene00017708	chrII	chrII:2638406-2638997	132.978	37.4136	-1.82955	0.0331133	yes
F22F7.7	F22F7.7	WBGene00017724	chrV	chrV:2131510-2140041	0.372053	6.78086	4.18789	0.00210696	yes
F22H10.4	F22H10.4	WBGene00017728	chrX	chrX:16684340-16685634	2.94192	24.5236	3.05934	0.00290709	yes
F22H10.5	F22H10.5	WBGene00017729	chrX	chrX:16686241-16688338	2.67299	29.4496	3.46172	0.000199439	yes
F23B2.10	F23B2.10	WBGene00009077	chrIV	chrIV:9152804-9154306	1.37726	81.9311	5.89454	4.51e-08	yes
F23B2.7	F23B2.7	WBGene00009075	chrIV	chrIV:9150476-9152029	3.14573	32.5518	3.37127	0.014213	yes
F23D12.10	F23D12.10	WBGene00045291	chrX	chrX:14413640-14415586	0.086269	6.72122	6.28374	0.00561843	yes
F23D12.2	F23D12.2	WBGene00009086	chrX	chrX:14416208-14421402	0.0311925	1.53429	5.62023	0.0157019	yes
F23F12.8	F23F12.8	WBGene00017754	chrIII	chrIII:6483164-6488822	0.397462	3.18431	3.00209	0.00690585	yes
F25B4.2	F25B4.2	WBGene00017766	chrV	chrV:5709401-5712311	0.302014	3.18312	3.39775	0.0165684	yes
F25B4.4	F25B4.4	WBGene00017767	chrV	chrV:5684868-5685679	135.978	36.9037	-1.88154	0.0257627	yes
F25E5.1	F25E5.1	WBGene00017782	chrV	chrV:7465877-7471174	1.02484	9.93052	3.27647	0.000168651	yes
F25E5.4	F25E5.4	WBGene00017785	chrV	chrV:7449333-7451130	0.0991638	1.75185	4.14292	0.0498128	yes
F25E5.5	F25E5.5	WBGene00017786	chrV	chrV:7447253-7448865	0.600042	8.77668	3.87054	0.00171642	yes
F25F8.1	F25F8.1	WBGene00017795	chrI	chrI:4884903-4895496	0.410442	7.15103	4.1229	0.000745818	yes
F25H2.2	F25H2.2	WBGene00009116	chrI	chrI:10543012-10546414	1.96864	57.1951	4.86062	4.6e-08	yes
F25H9.2	F25H9.2	WBGene00009135	chrV	chrV:13458129-13459425	0.969795	7.85192	3.01729	0.016428	yes
F26A3.4	F26A3.4	WBGene00009142	chrI	chrI:7656980-7658289	2.11353	34.1307	4.01335	3.62e-05	yes
F26E4.3	F26E4.3	WBGene00009158	chrI	chrI:9762395-9767860	0.398618	6.67407	4.06549	0.00123664	yes
F26E4.4	F26E4.4	WBGene00009159	chrI	chrI:9768935-9772556	151.354	44.0567	-1.78049	0.0399898	yes
F27C1.11	F27C1.11	WBGene00017858	chrI	chrI:5436800-5443029	0.214678	2.88172	3.74668	0.00663079	yes
F28B4.1	F28B4.1	WBGene00017890	chrX	chrX:3205067-3206159	3.18799	17.6908	2.47228	0.0199223	yes
F28C1.3	F28C1.3	WBGene00009201	chrV	chrV:12468663-12472691	0.13611	7.62116	5.80716	9.61e-05	yes
F28C10.3	F28C10.3	WBGene00017898	chrX	chrX:531885-535750	1.40521	30.6517	4.44711	1.98e-06	yes
F28D1.9	F28D1.9	WBGene00009218	chrIV	chrIV:12392100-12398682	1.24607	7.63578	2.61539	0.00618112	yes
F28F8.9	F28F8.9	WBGene00044188	chrV	chrV:15577633-15578377	242.821	59.3013	-2.03376	0.0104721	yes
F28H1.1	F28H1.1	WBGene00017908	chrI	chrI:3995711-3996953	0.244477	10.1301	5.37281	0.000485143	yes
F28H6.4	F28H6.4	WBGene00009233	chrX	chrX:14127811-14133417	1.74545	25.5449	3.87137	1.54e-06	yes
F28H7.8	F28H7.8	WBGene00009241	chrV	chrV:10758939-10760549	0.712415	16.9308	4.57079	5.23e-05	yes
F29D10.3	F29D10.3	WBGene00009252	chrI	chrI:8842889-8845588	2.12021	12.2203	2.527	0.0227795	yes
F29G9.7	F29G9.7	WBGene00017933	chrV	chrV:6035379-6036544	0.29266	13.7316	5.55213	0.00117235	yes
F31A3.5	F31A3.5	WBGene00017939	chrX	chrX:17554928-17561389	0.223257	4.93169	4.46531	0.000252901	yes
F31D5.6	F31D5.6	WBGene00017949	chrII	chrII:4209786-4213338	2.93928	14.5365	2.30615	0.0277334	yes
F31E8.4	F31E8.4	WBGene00017954	chrII	chrII:6792187-6800101	0.334464	7.61213	4.50838	0.0213739	yes
F31E9.6	F31E9.6	WBGene00009299	chrV	chrV:17313600-17315100	4.45549	18.2311	2.03274	0.0376183	yes
F32B5.6	F32B5.6	WBGene00017979	chrI	chrI:2668161-2672417	3.67797	52.3991	3.83256	0.00310819	yes
F32B5.7	F32B5.7	WBGene00017980	chrI	chrI:2672951-2682799	1.51057	6.18774	2.03432	0.0411573	yes
F32D1.7	F32D1.7	WBGene00017986	chrV	chrV:4374959-4376165	57.3993	16.3379	-1.81281	0.0300305	yes
F32E10.9	F32E10.9	WBGene00043068	chrIV	chrIV:7562208-7563103	47.9733	12.2838	-1.96547	0.0204207	yes
F33H2.8	F33H2.8	WBGene00009371	chrI	chrI:15031137-15033028	2.12604	28.3928	3.73929	0.00255891	yes
F34D10.6	F34D10.6	WBGene00009375	chrIII	chrIII:3753985-3758122	0.191167	3.34448	4.12888	0.0163768	yes
F34D10.7	F34D10.7	WBGene00009376	chrIII	chrIII:3747541-3752615	0.284881	6.76548	4.56976	0.00110767	yes
F35B3.7	F35B3.7	WBGene00018033	chrX	chrX:17035132-17042882	0.19058	1.90515	3.32144	0.0462244	yes
F35C8.8	F35C8.8	WBGene00018038	chrX	chrX:5372116-5374411	0.299055	10.7822	5.17209	0.00757575	yes
F35D11.3	F35D11.3	WBGene00018044	chrII	chrII:4608366-4612048	1.86017	43.4932	4.54729	9.31e-08	yes
F35D2.3	F35D2.3	WBGene00018041	chrII	chrII:7570556-7572383	0.100799	3.48664	5.11228	0.0259618	yes
F35F10.12	F35F10.12	WBGene00018061	chrV	chrV:3313344-3315513	0.301719	2.60102	3.1078	0.0309286	yes
F35H12.4	F35H12.4	WBGene00018076	chrX	chrX:920251-924507	1.39304	7.18839	2.36744	0.0194264	yes
F35H12.5	F35H12.5	WBGene00018077	chrX	chrX:918350-920069	0.18794	5.25719	4.80595	0.0305326	yes
F36A2.3	F36A2.3	WBGene00009453	chrI	chrI:8798778-8801651	6.00474	34.3077	2.51436	0.00319307	yes
F36D3.1	F36D3.1	WBGene00009469	chrV	chrV:16499330-16502847	5.99636	39.7696	2.72951	0.000922235	yes
F36F12.8	F36F12.8	WBGene00018099	chrV	chrV:2090679-2091614	40.9197	3.8394	-3.41384	1.13e-05	yes
F36F2.2	F36F2.2	WBGene00009476	chrI	chrI:9016789-9017987	1.0534	7.82898	2.89378	0.0277334	yes
F36H12.2	F36H12.2	WBGene00018118	chrIV	chrIV:5249384-5308853	175.51	46.9244	-1.90314	0.0261129	yes
F36H2.3	F36H2.3	WBGene00009500	chrI	chrI:9254525-9261633	0.0934744	1.20398	3.68709	0.0163768	yes
F37A4.3	F37A4.3	WBGene00018133	chrIII	chrIII:6718640-6719689	0.327691	5.84108	4.15583	0.0250589	yes
F37A4.4	F37A4.4	WBGene00018134	chrIII	chrIII:6713527-6717966	0.12412	3.6838	4.89139	0.000205183	yes
F37B4.10	F37B4.10	WBGene00018140	chrV	chrV:2875800-2877633	2.85984	17.9222	2.64774	0.00682875	yes
F37C12.18	F37C12.18	WBGene00044005	chrIII	chrIII:7194031-7195362	3.02102	25.52	3.07852	0.00280558	yes
F37C4.5	F37C4.5	WBGene00018145	chrIV	chrIV:3871824-3874410	2.15378	11.916	2.46795	0.0384198	yes
F38A5.7	F38A5.7	WBGene00018164	chrIV	chrIV:6601671-6602370	1.03361	45.5387	5.46133	1e-05	yes
F38B7.3	F38B7.3	WBGene00009534	chrV	chrV:11549282-11551529	0.464093	4.80815	3.37299	0.00947095	yes
F38E9.5	F38E9.5	WBGene00018187	chrX	chrX:16446124-16451262	0.141735	2.09133	3.88316	0.0387791	yes
F39B1.1	F39B1.1	WBGene00009552	chrX	chrX:15234777-15246296	0.344079	7.78069	4.49909	3.13e-06	yes
F39B2.3	F39B2.3	WBGene00009554	chrI	chrI:14788156-14789471	61.9217	18.3866	-1.75179	0.0356041	yes
F39C12.1	F39C12.1	WBGene00018193	chrX	chrX:4834865-4853035	0.603649	10.0647	4.05945	1.29e-07	yes
F39F10.3	F39F10.3	WBGene00018203	chrX	chrX:16891917-16892954	0.374691	7.61712	4.34547	0.00765203	yes
F40F12.7	F40F12.7	WBGene00009595	chrIII	chrIII:9914171-9915728	0.301641	5.78033	4.26025	0.0060618	yes
F40F4.7	F40F4.7	WBGene00018238	chrX	chrX:3243890-3245968	1.40803	22.1867	3.97795	7.81e-05	yes
F41B4.3	F41B4.3	WBGene00018259	chrX	chrX:6835506-6836069	2.98192	151.256	5.6646	2.59e-07	yes
F41C3.5	F41C3.5	WBGene00018271	chrII	chrII:4737612-4739902	1.04851	6.32145	2.59192	0.0200179	yes
F42C5.3	F42C5.3	WBGene00018345	chrIV	chrIV:7286170-7287356	0.872653	70.6198	6.33852	1.26e-06	yes
F42C5.4	F42C5.4	WBGene00018346	chrIV	chrIV:7288051-7292116	0.258202	6.46593	4.64628	0.000238761	yes
F42C5.9	F42C5.9	WBGene00018349	chrIV	chrIV:7314362-7317152	4.51894	40.4958	3.16371	6.83e-05	yes
F42F12.3	F42F12.3	WBGene00009635	chrX	chrX:12350519-12351524	2.83907	97.3622	5.09987	8.16e-08	yes
F42H10.5	F42H10.5	WBGene00018369	chrIII	chrIII:8470602-8478296	0.237266	2.66196	3.48791	0.00391361	yes
F42H11.1	F42H11.1	WBGene00009646	chrI	chrI:9576348-9577881	0.788868	5.81302	2.88143	0.0307118	yes
F43C1.1	F43C1.1	WBGene00009647	chrIII	chrIII:4210535-4216679	1.1496	5.25393	2.19226	0.0252682	yes
F43C11.9	F43C11.9	WBGene00018386	chrII	chrII:2337916-2340751	1.26237	16.6429	3.7207	0.000431349	yes
F43D2.6	F43D2.6	WBGene00044191	chrV	chrV:14629797-14635158	0.587644	9.21991	3.97174	0.0228084	yes
F43E2.5	F43E2.5	WBGene00018393	chrII	chrII:7359917-7364064	7.74637	76.4185	3.30233	0.0002155	yes
F43G6.8	F43G6.8	WBGene00009660	chrII	chrII:11812235-11814045	1.53322	9.74453	2.66803	0.0183878	yes
F43G9.8	F43G9.8	WBGene00009670	chrI	chrI:8617393-8618883	0.863933	8.51726	3.3014	0.0251297	yes
F44D12.1	F44D12.1	WBGene00009678	chrIV	chrIV:10009944-10016377	0.409704	34.5316	6.39719	1.68e-10	yes
F44E2.4	F44E2.4	WBGene00018418	chrIII	chrIII:8832403-8838343	0.240275	3.77126	3.97229	0.000588998	yes
F44E5.2	F44E5.2	WBGene00009689	chrII	chrII:11766708-11773976	0.156096	3.09394	4.30894	0.00275781	yes
F44E5.4	F44E5.4	WBGene00009691	chrII	chrII:11759588-11761792	108.956	536.207	2.29904	0.0198206	yes
F45C12.15	F45C12.15	WBGene00018446	chrII	chrII:1733725-1736539	1.9075	70.4752	5.20736	8.49e-10	yes
F45F2.11	F45F2.11	WBGene00018483	chrV	chrV:8519324-8520741	107.955	30.3811	-1.82918	0.0332958	yes
F45G2.2	F45G2.2	WBGene00009730	chrIII	chrIII:13409819-13423435	1.36283	17.2645	3.66313	0.00211524	yes
F46A9.1	F46A9.1	WBGene00009754	chrI	chrI:9457808-9458840	0.13747	31.4941	7.83982	0.000814984	yes
F46F2.4	F46F2.4	WBGene00009788	chrX	chrX:15257527-15258942	1.02121	5.97341	2.54828	0.0461922	yes
F46F6.2	F46F6.2	WBGene00009793	chrX	chrX:10397182-10406243	3.16348	19.8598	2.65027	0.000887517	yes
F46H5.3	F46H5.3	WBGene00018519	chrX	chrX:7230685-7238618	22.7586	255.416	3.48836	0.000262852	yes
F46H5.4	F46H5.4	WBGene00018520	chrX	chrX:7245033-7254518	0.476717	17.1406	5.16814	1.98e-09	yes
F47A4.5	F47A4.5	WBGene00009801	chrX	chrX:9833321-9837981	1.35728	18.7276	3.78638	4.15e-06	yes
F47B10.1	F47B10.1	WBGene00009812	chrX	chrX:10897612-10900051	9.6778	110.243	3.50986	8.75e-06	yes
F47B7.2	F47B7.2	WBGene00018533	chrX	chrX:3772746-3778041	5.79758	37.4888	2.69294	0.00457459	yes
F47B8.2	F47B8.2	WBGene00009803	chrV	chrV:14316003-14316609	1.38218	104.423	6.23935	3.27e-07	yes
F47B8.3	F47B8.3	WBGene00009804	chrV	chrV:14321463-14322861	1.32412	43.8328	5.04891	3.99e-06	yes
F47G3.3	F47G3.3	WBGene00018578	chrX	chrX:2375989-2378645	13.6688	74.8436	2.45299	0.00205311	yes
F47G4.2	F47G4.2	WBGene00009823	chrI	chrI:14075823-14082369	1.15244	12.1516	3.39838	0.000793101	yes
F47G4.4	F47G4.4	WBGene00009825	chrI	chrI:14062736-14068797	0.248725	3.35285	3.75276	0.00586939	yes
F47G9.4	F47G9.4	WBGene00009831	chrV	chrV:11317209-11321740	0.139546	4.71893	5.07965	0.000218422	yes
F48B9.8	F48B9.8	WBGene00018593	chrX	chrX:2174021-2176382	15.6325	58.8347	1.91212	0.0357471	yes
F48E3.3	F48E3.3	WBGene00018604	chrX	chrX:7495638-7500931	11.6082	54.2817	2.22532	0.00596218	yes
F48E3.9	F48E3.9	WBGene00018608	chrX	chrX:7483443-7484736	5.01571	22.119	2.14076	0.0303054	yes
F48F7.6	F48F7.6	WBGene00009851	chrX	chrX:13977759-13978895	0.59473	8.35075	3.8116	0.0065015	yes
F48G7.2	F48G7.2	WBGene00018614	chrV	chrV:636587-637480	0.184807	13.4126	6.18143	0.00190793	yes
F49E7.2	F49E7.2	WBGene00018634	chrX	chrX:1095543-1097010	2.67116	42.8064	4.00229	8.61e-05	yes
F49H6.5	F49H6.5	WBGene00009908	chrV	chrV:17023450-17025323	0.356174	5.15247	3.85461	0.0102438	yes
F52B11.5	F52B11.5	WBGene00009927	chrIV	chrIV:14102069-14103128	1.89066	32.9952	4.1253	0.00244871	yes
F52C6.2	F52C6.2	WBGene00018659	chrII	chrII:1926474-1927253	362.682	74.3567	-2.28617	0.00228196	yes
F52C6.3	F52C6.3	WBGene00018660	chrII	chrII:1924771-1925701	155.492	25.304	-2.6194	0.000399771	yes
F52C6.4	F52C6.4	WBGene00018661	chrII	chrII:1922870-1924262	63.2781	10.0655	-2.65229	0.000484624	yes
F52C9.5	F52C9.5	WBGene00018675	chrIII	chrIII:5302178-5306285	0.137918	2.5391	4.20244	0.01217	yes
F52D10.2	F52D10.2	WBGene00009930	chrX	chrX:11589652-11591652	0.184064	12.1699	6.04697	5.41e-05	yes
F52D2.6	F52D2.6	WBGene00018688	chrX	chrX:1974906-1980931	0.431774	10.8865	4.65612	3.45e-06	yes
F52D2.7	F52D2.7	WBGene00018689	chrX	chrX:1962566-1966164	0.264438	31.941	6.91634	2.62e-07	yes
F52E4.5	F52E4.5	WBGene00018702	chrX	chrX:3085884-3087329	0.283553	43.4082	7.25821	3.4e-07	yes
F52F12.9	F52F12.9	WBGene00009942	chrI	chrI:9926548-9928808	0.429359	8.16806	4.24974	0.00413049	yes
F52G3.1	F52G3.1	WBGene00018710	chrX	chrX:16963795-16972739	0.722817	24.6968	5.09455	2.42e-09	yes
F52H2.1	F52H2.1	WBGene00018714	chrX	chrX:2572855-2576923	0.110423	1.87407	4.08506	0.0251275	yes
F52H2.7	F52H2.7	WBGene00018719	chrX	chrX:2566549-2572646	0.367273	2.54644	2.79355	0.0311443	yes
F52H3.4	F52H3.4	WBGene00009946	chrII	chrII:10041074-10042430	84.8949	23.9497	-1.82567	0.025634	yes
F53A2.9	F53A2.9	WBGene00009953	chrIII	chrIII:13356721-13359176	0.970878	10.4421	3.42698	0.00200412	yes
F53B1.2	F53B1.2	WBGene00018735	chrX	chrX:2108975-2111714	0.133562	4.08824	4.9359	0.00171642	yes
F53B2.8	F53B2.8	WBGene00009957	chrIV	chrIV:12526237-12527317	0.500253	21.3092	5.41268	7.97e-05	yes
F53B6.2	F53B6.2	WBGene00009958	chrI	chrI:8928748-8942251	0.384329	11.8887	4.95111	0.00362616	yes
F53E10.1	F53E10.1	WBGene00018758	chrV	chrV:2615787-2618950	0.566052	7.94689	3.81138	0.0166732	yes
F53H4.6	F53H4.6	WBGene00010011	chrX	chrX:15852865-15860532	3.82474	24.7775	2.69559	0.00078551	yes
F54B11.5	F54B11.5	WBGene00010028	chrX	chrX:13594061-13595997	7.23274	56.8377	2.97423	0.000326087	yes
F54C1.1	F54C1.1	WBGene00018789	chrI	chrI:5008788-5013374	0.0793847	2.12514	4.74255	0.0301101	yes
F54C9.11	F54C9.11	WBGene00010045	chrII	chrII:8583449-8584999	1.03466	7.18392	2.79561	0.025634	yes
F54D1.6	F54D1.6	WBGene00010047	chrIV	chrIV:11287788-11294891	0.594384	4.84454	3.02689	0.00128056	yes
F54D10.3	F54D10.3	WBGene00018804	chrII	chrII:3812307-3813348	4.03403	97.1487	4.5899	8.37e-08	yes
F54D10.4	F54D10.4	WBGene00018805	chrII	chrII:3805992-3807055	32.8412	7.68434	-2.09552	0.0198875	yes
F54D10.5	F54D10.5	WBGene00018806	chrII	chrII:3807097-3808225	73.1263	22.548	-1.69739	0.040051	yes
F54D11.3	F54D11.3	WBGene00018813	chrV	chrV:4635513-4637000	0.777551	6.02099	2.95299	0.0271729	yes
F54D5.5	F54D5.5	WBGene00010051	chrII	chrII:11564378-11566954	0.615291	38.0561	5.95072	0.00114562	yes
F54F7.6	F54F7.6	WBGene00010066	chrX	chrX:11865473-11866759	4.29221	20.4704	2.25375	0.0204207	yes
F54G2.1	F54G2.1	WBGene00018837	chrX	chrX:2621265-2664365	1.43968	8.61797	2.5816	0.0201843	yes
F55A3.5	F55A3.5	WBGene00018850	chrI	chrI:10781962-10782787	144.355	38.5139	-1.90617	0.0195579	yes
F55A3.6	F55A3.6	WBGene00018851	chrI	chrI:10783988-10784780	328.788	66.4767	-2.30624	0.00475549	yes
F55A3.7	F55A3.7	WBGene00018852	chrI	chrI:10785116-10787852	185.716	37.7633	-2.29804	0.00284547	yes
F55A4.1	F55A4.1	WBGene00018853	chrX	chrX:1035544-1036994	2.59786	17.7833	2.77513	0.0130191	yes
F55B12.10	F55B12.10	WBGene00077439	chrV	chrV:13839754-13840267	0.617815	176.922	8.16172	0.00864914	yes
F55C12.1	F55C12.1	WBGene00018869	chrII	chrII:5884526-5892645	0.440069	5.27503	3.58338	0.00741879	yes
F55C5.10	F55C5.10	WBGene00010098	chrV	chrV:12282867-12283980	0.398537	41.8202	6.71334	0.000815417	yes
F55D12.2	F55D12.2	WBGene00010111	chrI	chrI:7889350-7894850	2.30532	14.2432	2.62723	0.00222987	yes
F55G1.7	F55G1.7	WBGene00018903	chrIV	chrIV:7466905-7468451	0.40505	4.46408	3.46219	0.0360126	yes
F55G7.1	F55G7.1	WBGene00010119	chrX	chrX:11924392-11926912	0.120011	4.10851	5.09737	0.0329394	yes
F55H12.3	F55H12.3	WBGene00010134	chrI	chrI:8876077-8893044	0.0431197	0.962755	4.48075	0.00264258	yes
F55H12.4	F55H12.4	WBGene00010135	chrI	chrI:8893309-8894130	0.306391	5.71257	4.22069	0.025419	yes
F56D2.5	F56D2.5	WBGene00018966	chrIII	chrIII:5578395-5581179	3.94489	28.3227	2.8439	0.000849976	yes
F56F10.4	F56F10.4	WBGene00018987	chrX	chrX:864739-871078	0.295214	17.2058	5.86498	4.46e-08	yes
F56F3.4	F56F3.4	WBGene00010155	chrIII	chrIII:4468846-4470778	0.548739	3.90268	2.83027	0.0329049	yes
F57A10.4	F57A10.4	WBGene00010185	chrV	chrV:15769420-15770283	64.6669	10.4598	-2.62817	0.000930425	yes
F57A8.1	F57A8.1	WBGene00010177	chrV	chrV:10037315-10047760	3.4482	22.7996	2.7251	0.00361688	yes
F57B10.5	F57B10.5	WBGene00019003	chrI	chrI:6562699-6563652	37.3378	133.336	1.83636	0.0317835	yes
F57C7.1	F57C7.1	WBGene00010199	chrX	chrX:10569210-10575656	0.577044	23.5586	5.35142	6.45e-07	yes
F57C9.6	F57C9.6	WBGene00019012	chrI	chrI:4821976-4824812	1.84095	12.7238	2.78901	0.00664338	yes
F57G12.1	F57G12.1	WBGene00010221	chrX	chrX:12169030-12171615	0.324715	11.6853	5.16938	9.88e-06	yes
F58A4.2	F58A4.2	WBGene00010227	chrIII	chrIII:9598390-9600661	166.254	34.6902	-2.26079	0.00937373	yes
F58E2.3	F58E2.3	WBGene00019047	chrIV	chrIV:3467426-3469825	0.195291	4.01477	4.36162	0.00354326	yes
F58E2.4	F58E2.4	WBGene00019048	chrIV	chrIV:3463931-3466273	0.163239	4.34688	4.73492	0.00240847	yes
F58F9.3	F58F9.3	WBGene00019057	chrIV	chrIV:6233241-6235596	0.0643946	23.833	8.53181	0.00613203	yes
F58H1.5	F58H1.5	WBGene00010288	chrV	chrV:11958371-11962653	0.08634	3.21527	5.21877	0.0251421	yes
F59B2.13	F59B2.13	WBGene00010315	chrIII	chrIII:9023884-9026966	0.12044	2.06736	4.10141	0.0478544	yes
F59B2.8	F59B2.8	WBGene00010310	chrIII	chrIII:9007896-9010044	0.395558	35.0065	6.46759	5.76e-07	yes
F59B2.9	F59B2.9	WBGene00010311	chrIII	chrIII:9010666-9012291	0.317378	6.55875	4.36915	0.00247594	yes
F59C6.12	F59C6.12	WBGene00044251	chrI	chrI:10520859-10521953	126.567	31.2697	-2.01706	0.0129103	yes
F59D12.1	F59D12.1	WBGene00010329	chrX	chrX:15666692-15672295	0.489622	3.46545	2.8233	0.0338021	yes
F59D12.5	F59D12.5	WBGene00010332	chrX	chrX:15646502-15647289	2.75722	31.2523	3.50268	0.00284223	yes
F59F4.1	F59F4.1	WBGene00010336	chrX	chrX:15833982-15838477	0.757079	4.76993	2.65545	0.0246393	yes
C56E6.2	C56E6.2	WBGene00016970	chrII	chrII:6524894-6526301	0.514402	8.98682	4.12684	0.00180962	yes
R07E5.4	R07E5.4	WBGene00011112	chrIII	chrIII:4394767-4396298	3.71109	47.4421	3.67625	0.000313356	yes
H02I12.5	H02I12.5	WBGene00010353	chrIV	chrIV:11401925-11403315	61.8551	15.7737	-1.97138	0.0168748	yes
H03A11.1	H03A11.1	WBGene00010356	chrX	chrX:15209232-15213190	0.100662	4.95955	5.62262	0.00071129	yes
H04D03.4	H04D03.4	WBGene00010365	chrIII	chrIII:10445707-10451015	1.01958	9.03977	3.14831	0.00158446	yes
H08J11.2	H08J11.2	WBGene00019173	chrX	chrX:9087567-9097402	0.224972	4.80118	4.41557	0.0175723	yes
H12D21.7	H12D21.7	WBGene00010383	chrV	chrV:14895631-14898997	0.339421	4.70741	3.79379	0.0185611	yes
H13N06.4	H13N06.4	WBGene00010397	chrX	chrX:15497486-15504827	0.336522	11.8283	5.1354	0.000149013	yes
H16D19.4	H16D19.4	WBGene00010402	chrI	chrI:12640727-12644417	1.14328	13.1329	3.52194	0.001108	yes
H28G03.2	H28G03.2	WBGene00019250	chrX	chrX:5205739-5216202	0.79804	7.6169	3.25467	0.00777075	yes
H35N09.2	H35N09.2	WBGene00019266	chrX	chrX:8603471-8606170	0.845097	12.8296	3.92422	0.000671557	yes
H36L18.2	H36L18.2	WBGene00010424	chrX	chrX:12652523-12653452	0.622482	56.1405	6.49487	6.82e-05	yes
H40L08.1	H40L08.1	WBGene00010433	chrX	chrX:15080711-15084016	9.071	53.9471	2.57221	0.00124999	yes
K01G12.3	K01G12.3	WBGene00010483	chrIV	chrIV:14193500-14195935	0.0803649	5.10001	5.98779	0.0130652	yes
K02A11.3	K02A11.3	WBGene00010488	chrI	chrI:9746028-9747907	1.34801	9.99123	2.88983	0.0147015	yes
K02A6.3	K02A6.3	WBGene00019294	chrX	chrX:8228020-8231880	0.471703	25.3977	5.75068	0.00216343	yes
K02D7.5	K02D7.5	WBGene00019300	chrIV	chrIV:307504-311214	0.187288	3.19684	4.09332	0.029695	yes
K02E2.6	K02E2.6	WBGene00010507	chrV	chrV:20380548-20382005	0.842642	7.70671	3.19312	0.0336127	yes
K02F2.2	K02F2.2	WBGene00019322	chrI	chrI:6836388-6838138	80.8439	317.814	1.97497	0.0222145	yes
K02F6.9	K02F6.9	WBGene00019343	chrII	chrII:2557833-2563682	7.2437	0.931495	-2.95911	0.000753802	yes
K03A1.2	K03A1.2	WBGene00019351	chrX	chrX:7292090-7295990	0.182314	3.44238	4.2389	0.00844822	yes
K03A11.1	K03A11.1	WBGene00010519	chrX	chrX:13051726-13055267	0.0804929	4.29273	5.73689	0.000660339	yes
K03H1.10	K03H1.10	WBGene00010545	chrIII	chrIII:9923085-9924705	0.104279	3.14829	4.91604	0.03559	yes
K03H1.11	K03H1.11	WBGene00010546	chrIII	chrIII:9950823-9951875	413.102	97.2965	-2.08604	0.00804824	yes
K03H1.5	K03H1.5	WBGene00010540	chrIII	chrIII:9932327-9939622	0.0792016	2.03925	4.68637	0.000976059	yes
K04B12.2	K04B12.2	WBGene00010550	chrII	chrII:14434375-14438901	4.30662	32.1303	2.89931	0.00108159	yes
K04C1.2	K04C1.2	WBGene00010552	chrX	chrX:14238638-14241275	0.308017	39.3003	6.99539	3.34e-09	yes
K04C1.3	K04C1.3	WBGene00010553	chrX	chrX:14241502-14243328	0.224046	6.82183	4.92829	0.00582935	yes
K04D7.4	K04D7.4	WBGene00010558	chrIV	chrIV:10180637-10194387	0.391377	7.3909	4.23912	0.0112521	yes
K04G11.4	K04G11.4	WBGene00010572	chrX	chrX:14350069-14352078	0.347576	8.57018	4.62392	0.00202358	yes
K04G2.10	K04G2.10	WBGene00010568	chrI	chrI:8057756-8060552	1.04087	17.2238	4.04854	0.000299197	yes
K04G2.11	K04G2.11	WBGene00010569	chrI	chrI:8039908-8040521	91.9667	20.6592	-2.15432	0.00951453	yes
K05C4.4	K05C4.4	WBGene00010581	chrI	chrI:14735224-14736934	84.4687	21.1556	-1.99738	0.0124677	yes
K06H7.2	K06H7.2	WBGene00019456	chrIII	chrIII:8093518-8096239	4.18609	27.0698	2.69301	0.0021795	yes
K07E3.1	K07E3.1	WBGene00019490	chrX	chrX:8110399-8114697	0.561378	13.08	4.54224	3.4e-07	yes
K08A2.1	K08A2.1	WBGene00019511	chrII	chrII:2997023-3000656	11.0273	62.4754	2.50221	0.00173641	yes
K08E4.7	K08E4.7	WBGene00045036	chrIV	chrIV:12075794-12076892	2.09887	11.3882	2.43986	0.0290433	yes
K09A9.4	K09A9.4	WBGene00010702	chrX	chrX:15591299-15595286	0.331131	29.4345	6.47396	2.39e-09	yes
K09C4.10	K09C4.10	WBGene00019554	chrX	chrX:3276040-3280187	0.627678	5.77944	3.20283	0.00113953	yes
K09D9.12	K09D9.12	WBGene00019569	chrV	chrV:4002311-4005168	6.59063	24.0858	1.86969	0.0376372	yes
K09E3.5	K09E3.5	WBGene00019576	chrX	chrX:17109345-17110551	0.343492	8.21538	4.57998	0.00679276	yes
K09E3.7	K09E3.7	WBGene00019578	chrX	chrX:17131410-17134418	0.380709	8.69849	4.514	2.33e-05	yes
K09E9.3	K09E9.3	WBGene00010726	chrX	chrX:15611776-15613723	14.7358	59.0785	2.00331	0.0163768	yes
K09H9.8	K09H9.8	WBGene00045387	chrI	chrI:3138540-3140572	7.08292	37.9731	2.42256	0.0119656	yes
K10B3.5	K10B3.5	WBGene00019611	chrX	chrX:3103240-3106269	3.89572	17.6921	2.18314	0.0141132	yes
K10B4.3	K10B4.3	WBGene00019615	chrII	chrII:114467-121208	0.118836	2.66966	4.48961	0.00515522	yes
K10F12.6	K10F12.6	WBGene00019638	chrIII	chrIII:398728-399391	2.24399	26.2582	3.54863	0.0162574	yes
K10G9.1	K10G9.1	WBGene00010755	chrIII	chrIII:10295042-10298586	0.384349	2.65909	2.79044	0.0461922	yes
K11D12.5	K11D12.5	WBGene00019645	chrV	chrV:5029378-5030792	0.698127	28.7489	5.36387	0.000109544	yes
K11G12.5	K11G12.5	WBGene00019656	chrX	chrX:6723460-6725631	0.472506	10.6812	4.4986	0.000496638	yes
K11G12.6	K11G12.6	WBGene00019657	chrX	chrX:6725741-6729618	0.54418	28.4795	5.7097	1.11e-07	yes
K11H3.4	K11H3.4	WBGene00010781	chrIII	chrIII:9832847-9838224	82.8341	26.0529	-1.66878	0.0468767	yes
K12H6.2	K12H6.2	WBGene00019683	chrII	chrII:2812962-2815549	76.7571	17.006	-2.17426	0.00637478	yes
K12H6.6	K12H6.6	WBGene00019686	chrII	chrII:2828587-2831238	0.860254	17.8738	4.37694	0.000616312	yes
M02B7.2	M02B7.2	WBGene00019724	chrIV	chrIV:3803583-3804944	37.0361	10.7024	-1.791	0.0334836	yes
M02B7.7	M02B7.7	WBGene00044690	chrIV	chrIV:3806714-3807183	84.0204	21.3635	-1.97559	0.0351792	yes
M02E1.1	M02E1.1	WBGene00019733	chrX	chrX:325961-341232	2.38481	13.5227	2.50344	0.013981	yes
M04C9.4	M04C9.4	WBGene00010859	chrI	chrI:9355160-9357071	0.550517	9.61607	4.12659	0.000868333	yes
M04F3.2	M04F3.2	WBGene00019768	chrI	chrI:4765754-4767516	129.159	34.4597	-1.90617	0.021211	yes
M05B5.1	M05B5.1	WBGene00010869	chrI	chrI:7177950-7179428	0.449761	4.04213	3.16788	0.0224049	yes
M05B5.4	M05B5.4	WBGene00010872	chrI	chrI:7188492-7190560	0.596822	13.6443	4.51485	0.000115754	yes
M05B5.6	M05B5.6	WBGene00010873	chrI	chrI:7183050-7185707	0.161672	4.00008	4.62888	0.00501373	yes
M05D6.5	M05D6.5	WBGene00010878	chrII	chrII:8480434-8482167	12.8881	46.708	1.85763	0.0466304	yes
M110.3	M110.3	WBGene00010913	chrII	chrII:8214527-8216501	125.337	26.8235	-2.22425	0.00352538	yes
M117.6	M117.6	WBGene00044253	chrIV	chrIV:11827720-11828188	124.099	24.254	-2.3552	0.00528168	yes
M151.2	M151.2	WBGene00019794	chrII	chrII:3631446-3634136	0.137821	1.5113	3.45492	0.0492162	yes
M151.3	M151.3	WBGene00019795	chrII	chrII:3627200-3630863	0.0981567	1.62295	4.04739	0.034373	yes
M151.4	M151.4	WBGene00019796	chrII	chrII:3624200-3626884	0.0911298	2.6199	4.84544	0.008766	yes
M151.7	M151.7	WBGene00019799	chrII	chrII:3622316-3624001	0.251165	3.56656	3.82783	0.0142371	yes
M199.2	M199.2	WBGene00010951	chrIV	chrIV:15108742-15110882	0.297599	18.7089	5.97422	1.71e-06	yes
M28.5	M28.5	WBGene00010896	chrII	chrII:10657956-10658569	205.559	912.218	2.14983	0.0127564	yes
M60.4	M60.4	WBGene00019780	chrX	chrX:8232304-8236263	5.266	135.572	4.68621	7.92e-07	yes
M60.6	M60.6	WBGene00019781	chrX	chrX:8248155-8252407	0.234225	9.31306	5.31329	0.0015054	yes
R01H2.4	R01H2.4	WBGene00019812	chrIII	chrIII:7061050-7064009	0.533292	8.10279	3.92542	0.00120478	yes
R02F2.2	R02F2.2	WBGene00019832	chrIII	chrIII:5487602-5498904	0.668207	8.17485	3.61283	0.000968355	yes
R03E1.2	R03E1.2	WBGene00010993	chrX	chrX:14163029-14164439	0.640349	4.73959	2.88783	0.0311972	yes
R03G5.7	R03G5.7	WBGene00019848	chrX	chrX:7805631-7806759	0.31556	11.0119	5.125	0.0148704	yes
R04A9.3	R04A9.3	WBGene00019863	chrX	chrX:377390-380569	0.331428	10.6663	5.00822	0.00185404	yes
R04A9.5	R04A9.5	WBGene00019864	chrX	chrX:384382-388798	5.58243	35.192	2.65628	0.0012411	yes
R04E5.9	R04E5.9	WBGene00019872	chrX	chrX:8806062-8810982	5.63856	39.2858	2.80061	0.000764045	yes
R05D7.1	R05D7.1	WBGene00011026	chrI	chrI:12162387-12163524	1.83351	17.4652	3.2518	0.017662	yes
R05G6.10	R05G6.10	WBGene00019902	chrIV	chrIV:7517449-7520356	0.409233	4.40733	3.42891	0.00929999	yes
R05H11.1	R05H11.1	WBGene00019907	chrIII	chrIII:6795583-6797667	0.424261	11.3451	4.74097	6.82e-05	yes
R06C1.6	R06C1.6	WBGene00011060	chrI	chrI:11946991-11953091	1.54638	8.28642	2.42186	0.0193304	yes
R06C7.2	R06C7.2	WBGene00011062	chrI	chrI:7233657-7234499	76.9911	12.9805	-2.56835	0.000783695	yes
R07B7.10	R07B7.10	WBGene00011094	chrV	chrV:12084406-12086281	0.242014	14.2862	5.88339	0.00424556	yes
R07E4.3	R07E4.3	WBGene00019937	chrX	chrX:5953414-5953748	25.5503	203.53	2.99383	0.00100717	yes
R07E4.5	R07E4.5	WBGene00019938	chrX	chrX:5949507-5953139	2.42255	34.8866	3.84807	2.38e-06	yes
R07E5.11	R07E5.11	WBGene00011117	chrIII	chrIII:4414811-4415198	158.653	45.54	-1.80067	0.0339111	yes
R08B4.3	R08B4.3	WBGene00011139	chrX	chrX:11118907-11120933	2.28899	19.6949	3.10504	0.00485839	yes
R08E3.3	R08E3.3	WBGene00019959	chrX	chrX:4818568-4821678	35.2137	214.182	2.60463	0.0088819	yes
R08E5.2	R08E5.2	WBGene00019962	chrV	chrV:3772043-3776122	0.85937	23.388	4.76635	0.000113062	yes
R09A8.1	R09A8.1	WBGene00011152	chrX	chrX:12613692-12617812	1.04027	27.0963	4.70306	4.62e-08	yes
R09A8.2	R09A8.2	WBGene00011153	chrX	chrX:12619403-12623236	1.28357	19.1025	3.89553	7.1e-06	yes
R09F10.3	R09F10.3	WBGene00019987	chrX	chrX:8294572-8296612	0.596532	16.0961	4.75396	7.2e-06	yes
R09F10.8	R09F10.8	WBGene00019989	chrX	chrX:8325081-8326400	0.774727	96.162	6.95563	7.52e-11	yes
R10D12.8	R10D12.8	WBGene00011189	chrV	chrV:13950721-13953206	0.973544	5.49442	2.49665	0.0277078	yes
R10E11.9	R10E11.9	WBGene00011220	chrIII	chrIII:9792499-9793472	2.2105	15.4991	2.80974	0.0387791	yes
R119.1	R119.1	WBGene00020087	chrI	chrI:357238-363904	69.9228	19.6531	-1.83101	0.0246393	yes
R11A5.3	R11A5.3	WBGene00011231	chrI	chrI:7862836-7863548	14.3988	120.596	3.06617	0.000222132	yes
R11E3.1	R11E3.1	WBGene00020003	chrIV	chrIV:4789726-4791950	0.401276	5.40624	3.75196	0.00626003	yes
R11G10.3	R11G10.3	WBGene00044045	chrV	chrV:13523516-13530731	0.515557	13.4326	4.70346	0.00400882	yes
R11H6.2	R11H6.2	WBGene00011250	chrV	chrV:14597923-14600076	118.604	37.1008	-1.67663	0.0453112	yes
R12B2.2	R12B2.2	WBGene00020018	chrIII	chrIII:5807773-5809082	2.34094	69.8791	4.8997	1.53e-05	yes
R12C12.1	R12C12.1	WBGene00020022	chrII	chrII:6050347-6054279	0.711917	3.73162	2.39002	0.0349343	yes
R13A5.7	R13A5.7	WBGene00020050	chrIII	chrIII:7567399-7570066	0.309133	6.60218	4.41664	0.00120478	yes
R13A5.9	R13A5.9	WBGene00020051	chrIII	chrIII:7575210-7579344	1.21056	8.85633	2.87104	0.00314741	yes
R151.1	R151.1	WBGene00020106	chrIII	chrIII:7216463-7219554	1.77994	26.9222	3.91889	2.38e-05	yes
R186.1	R186.1	WBGene00011305	chrV	chrV:12961583-12963320	0.457445	38.3762	6.39047	2.78e-06	yes
R90.1	R90.1	WBGene00011283	chrV	chrV:12891510-12895856	0.498871	4.68066	3.22997	0.0034525	yes
T01B6.3	T01B6.3	WBGene00020135	chrX	chrX:2314910-2319325	0.95953	46.4994	5.59874	7.1e-05	yes
T01D3.1	T01D3.1	WBGene00011326	chrV	chrV:13689879-13692671	0.492516	4.22688	3.10135	0.016428	yes
T01G5.7	T01G5.7	WBGene00011342	chrV	chrV:15111949-15113611	0.288717	22.3298	6.27317	9.78e-05	yes
T03G11.6	T03G11.6	WBGene00020199	chrX	chrX:5177495-5179166	0.460893	5.50417	3.57802	0.00852879	yes
T04B2.5	T04B2.5	WBGene00011423	chrIV	chrIV:10056577-10062828	0.406477	6.40868	3.97878	0.000567762	yes
T04B8.5	T04B8.5	WBGene00020207	chrII	chrII:614773-624550	1.57208	10.1115	2.68524	0.00408383	yes
T04D3.1	T04D3.1	WBGene00011431	chrI	chrI:13302764-13304293	0.298758	37.533	6.97304	3.65e-08	yes
T04F3.1	T04F3.1	WBGene00011436	chrV	chrV:11740211-11754007	0.0807789	1.03044	3.67314	0.00230925	yes
T04F8.2	T04F8.2	WBGene00011441	chrX	chrX:11653502-11656503	1.56651	19.8466	3.66326	7.88e-05	yes
T04F8.6	T04F8.6	WBGene00011444	chrX	chrX:11667091-11672234	0.172367	3.39668	4.30057	0.00209313	yes
T04G9.1	T04G9.1	WBGene00020214	chrX	chrX:788351-796141	0.123125	7.92304	6.00786	9.66e-08	yes
T05A8.1	T05A8.1	WBGene00020227	chrII	chrII:2708819-2709344	0.379076	16.9635	5.48381	0.0149502	yes
T05A8.8	T05A8.8	WBGene00044367	chrII	chrII:2736691-2737561	1.90029	16.8185	3.14576	0.0321547	yes
T05B9.2	T05B9.2	WBGene00011465	chrII	chrII:11257063-11258189	1.34703	22.7746	4.07957	0.0020556	yes
T05C1.4	T05C1.4	WBGene00020251	chrII	chrII:4491146-4505144	0.383112	7.72332	4.33338	0.00505712	yes
T05C7.1	T05C7.1	WBGene00020257	chrIV	chrIV:47677-48844	0.125426	12.7206	6.66419	0.0350484	yes
T05D4.1	T05D4.1	WBGene00011474	chrIII	chrIII:13563239-13564889	1.76807	47.2049	4.73869	7.65e-07	yes
T05F1.13	T05F1.13	WBGene00011497	chrI	chrI:9650557-9652805	1.69822	28.3631	4.06192	4.23e-05	yes
T05H10.4	T05H10.4	WBGene00011509	chrII	chrII:8053084-8054913	0.400748	12.0684	4.9124	8.18e-05	yes
T05H10.8	T05H10.8	WBGene00011512	chrII	chrII:8059016-8061412	0.124491	6.4098	5.68617	0.0148222	yes
T06C10.3	T06C10.3	WBGene00020289	chrIV	chrIV:7870852-7873022	0.0588552	2.59154	5.4605	0.0198151	yes
T07A5.7	T07A5.7	WBGene00045475	chrIII	chrIII:10306661-10311464	0.836836	7.70555	3.20288	0.00450875	yes
T07C12.14	T07C12.14	WBGene00044204	chrV	chrV:9931002-9932145	85.3535	26.1609	-1.70604	0.0476878	yes
T07F12.1	T07F12.1	WBGene00020321	chrX	chrX:4894030-4896161	0.674916	28.5152	5.40088	1.49e-05	yes
T07F12.2	T07F12.2	WBGene00020322	chrX	chrX:4890190-4892298	1.26494	67.0204	5.72746	5.7e-09	yes
T08D2.2	T08D2.2	WBGene00011607	chrX	chrX:164088-171822	47.6914	14.047	-1.76347	0.0394992	yes
T08G2.2	T08G2.2	WBGene00020365	chrX	chrX:17205354-17209291	0.163031	3.46495	4.40962	0.0190734	yes
T09A12.2	T09A12.2	WBGene00020373	chrIV	chrIV:8222189-8223444	1.8804	15.7434	3.06564	0.0413329	yes
T09B9.4	T09B9.4	WBGene00011645	chrX	chrX:9771655-9774296	2.27595	12.8422	2.49635	0.00607376	yes
T10B10.3	T10B10.3	WBGene00011680	chrX	chrX:15173833-15181397	1.40512	22.0783	3.97386	0.000590572	yes
T10D4.3	T10D4.3	WBGene00020407	chrII	chrII:3129181-3131291	2.71085	31.6841	3.54694	5.93e-05	yes
T10E9.3	T10E9.3	WBGene00020413	chrI	chrI:6534072-6539189	0.0543261	1.5574	4.84135	0.0419008	yes
T10E9.4	T10E9.4	WBGene00020414	chrI	chrI:6525049-6528690	0.105416	2.02259	4.26203	0.0270107	yes
T11B7.1	T11B7.1	WBGene00011706	chrIV	chrIV:8840711-8842792	0.258813	2.79029	3.43044	0.0251297	yes
T11F9.13	T11F9.13	WBGene00011714	chrV	chrV:11482338-11482999	25.4407	4.07946	-2.64069	0.0472564	yes
T11G6.4	T11G6.4	WBGene00011719	chrIV	chrIV:10849727-10851912	0.481844	5.61637	3.543	0.00352382	yes
T12A2.15	T12A2.15	WBGene00020443	chrIII	chrIII:6224438-6229351	1.2725	24.1362	4.24547	0.00577803	yes
T12G3.2	T12G3.2	WBGene00011738	chrIV	chrIV:12038968-12046888	0.438564	10.3134	4.55558	0.00262884	yes
T13H5.6	T13H5.6	WBGene00011760	chrII	chrII:8526751-8531171	0.972342	62.2589	6.00067	8.02e-10	yes
T14D7.1	T14D7.1	WBGene00011767	chrII	chrII:8845537-8852210	0.545185	11.4471	4.39209	0.000154862	yes
T14F9.2	T14F9.2	WBGene00020508	chrX	chrX:2233988-2236676	0.595441	20.4314	5.10069	3.88e-06	yes
T14G8.2	T14G8.2	WBGene00011770	chrX	chrX:12857948-12859471	0.150931	3.94103	4.70661	0.0331133	yes
T14G8.3	T14G8.3	WBGene00011771	chrX	chrX:12861166-12869958	11.2642	90.2722	3.00253	0.000244044	yes
T15H9.6	T15H9.6	WBGene00011791	chrII	chrII:9607474-9609336	0.13523	1.92555	3.83178	0.0271641	yes
T16G1.9	T16G1.9	WBGene00011802	chrV	chrV:12944844-12950642	0.319759	4.33207	3.76	0.00117883	yes
T16G12.4	T16G12.4	WBGene00011805	chrIII	chrIII:10057753-10058585	28	121.471	2.11712	0.0114381	yes
T16G12.8	T16G12.8	WBGene00011809	chrIII	chrIII:10059210-10061828	0.835761	15.0577	4.17127	0.000184278	yes
T16H12.11	T16H12.11	WBGene00011819	chrIII	chrIII:10087131-10088454	134.229	27.5214	-2.28607	0.00474509	yes
T17A3.2	T17A3.2	WBGene00020540	chrIII	chrIII:134492-137964	5.51149	23.1074	2.06784	0.0280799	yes
T18D3.1	T18D3.1	WBGene00011820	chrX	chrX:12454676-12457876	0.169521	7.33411	5.43508	0.000218761	yes
T19D12.6	T19D12.6	WBGene00020581	chrII	chrII:6631120-6643083	0.344494	5.16936	3.90744	0.00288933	yes
T19H5.3	T19H5.3	WBGene00011848	chrII	chrII:9477809-9479475	0	4.22491	1.79769e+308	0.0332622	yes
T19H5.4	T19H5.4	WBGene00011849	chrII	chrII:9486328-9488199	0.199461	9.45347	5.56666	0.000226301	yes
T20B12.7	T20B12.7	WBGene00020604	chrIII	chrIII:7377788-7378982	772.748	216.56	-1.83523	0.0319578	yes
T20D4.7	T20D4.7	WBGene00020613	chrV	chrV:3408866-3409516	0.157185	18.3581	6.86781	0.00961725	yes
T20F10.2	T20F10.2	WBGene00011864	chrI	chrI:10298205-10300578	1.71048	27.1064	3.98616	0.0210942	yes
T20F7.1	T20F7.1	WBGene00020630	chrX	chrX:16872852-16880453	9.36664	39.2343	2.06651	0.0131832	yes
T20F7.6	T20F7.6	WBGene00020633	chrX	chrX:16866009-16868958	0.3384	16.7868	5.63246	3.35e-06	yes
T21E12.2	T21E12.2	WBGene00020654	chrI	chrI:4409692-4419306	0.34557	5.98733	4.11486	0.015656	yes
T21F4.1	T21F4.1	WBGene00020658	chrX	chrX:5630320-5631732	0.633608	6.15874	3.28097	0.0214353	yes
T21G5.4	T21G5.4	WBGene00020661	chrI	chrI:6872595-6873739	0.102313	5.11637	5.64406	0.022285	yes
T21G5.6	T21G5.6	WBGene00044898	chrI	chrI:6862395-6871168	0.20507	12.2581	5.90147	0.00113181	yes
T22B11.2	T22B11.2	WBGene00044620	chrIV	chrIV:4688543-4691818	0.565355	5.8239	3.36476	0.0336375	yes
T22B2.1	T22B2.1	WBGene00020665	chrX	chrX:3926085-3929472	0.112699	2.15826	4.25932	0.00581071	yes
T22B7.4	T22B7.4	WBGene00020673	chrX	chrX:5638546-5641328	0.628798	5.91616	3.23399	0.00372773	yes
T22C8.3	T22C8.3	WBGene00011924	chrII	chrII:8620494-8621923	1.17827	19.6623	4.06069	0.00127785	yes
T22E7.1	T22E7.1	WBGene00020693	chrI	chrI:5768965-5773620	0.25991	22.9539	6.46458	0.000299777	yes
T22G5.3	T22G5.3	WBGene00011930	chrV	chrV:13880901-13883907	0.435783	5.38541	3.62738	0.0219757	yes
T22H9.1	T22H9.1	WBGene00020705	chrV	chrV:359766-363669	115.773	31.2835	-1.88783	0.0175161	yes
T23B12.11	T23B12.11	WBGene00044553	chrV	chrV:8456170-8457175	2.30665	19.8895	3.10814	0.0356247	yes
T23B3.2	T23B3.2	WBGene00020710	chrI	chrI:6715950-6716983	2.15003	61.0663	4.82795	2.93e-05	yes
T23F11.4	T23F11.4	WBGene00011956	chrIII	chrIII:4663216-4665325	0.103625	5.42067	5.70903	0.0158623	yes
T23F2.5	T23F2.5	WBGene00020738	chrX	chrX:5516674-5517121	1.79883	31.5664	4.13326	0.00681538	yes
T23G5.6	T23G5.6	WBGene00011964	chrIII	chrIII:9240289-9242417	6.38719	70.0487	3.45511	1.7e-05	yes
T24A6.1	T24A6.1	WBGene00020744	chrV	chrV:3559113-3559748	271.277	79.5631	-1.76959	0.0365732	yes
T24A6.20	T24A6.20	WBGene00020756	chrV	chrV:3553145-3554559	0.606242	19.3808	4.99859	0.000113062	yes
T24B8.3	T24B8.3	WBGene00011977	chrII	chrII:9059327-9061078	6.08351	375.663	5.94839	1.13e-09	yes
T24C2.2	T24C2.2	WBGene00011981	chrX	chrX:14545784-14546650	0.434642	17.3613	5.3199	0.00108923	yes
T24C4.2	T24C4.2	WBGene00020758	chrIII	chrIII:867501-869850	0.286035	4.30804	3.91277	0.0157666	yes
T24D5.2	T24D5.2	WBGene00011990	chrX	chrX:12583729-12586370	1.0438	9.58341	3.1987	0.00155589	yes
T24D5.5	T24D5.5	WBGene00011993	chrX	chrX:12597961-12600262	1.95429	23.9828	3.61728	0.000112618	yes
T24E12.10	T24E12.10	WBGene00020777	chrII	chrII:3768685-3773194	0.271166	4.21607	3.95865	0.00345291	yes
T24E12.9	T24E12.9	WBGene00020776	chrII	chrII:3765089-3768471	0.183893	1.75498	3.25452	0.0414733	yes
T24F1.3	T24F1.3	WBGene00011995	chrII	chrII:11306334-11311872	2.70144	19.3451	2.84017	0.00233954	yes
T25B9.4	T25B9.4	WBGene00012010	chrIV	chrIV:10755739-10757696	0.0859129	2.63436	4.93843	0.0200381	yes
T26C11.4	T26C11.4	WBGene00020830	chrX	chrX:1840560-1845531	0.421824	11.1742	4.72739	1.47e-05	yes
T26F2.2	T26F2.2	WBGene00012058	chrV	chrV:13981532-13982956	0.413333	14.3689	5.1195	0.000754071	yes
T26F2.3	T26F2.3	WBGene00045401	chrV	chrV:13979555-13980892	1.15966	140.912	6.92495	1.67e-10	yes
T27A3.1	T27A3.1	WBGene00020838	chrI	chrI:6122591-6126853	2.5396	52.945	4.38182	0.0086768	yes
T27E7.6	T27E7.6	WBGene00012091	chrIV	chrIV:14539734-14542575	0.0202985	16.1114	9.6325	0.0256526	yes
T27F6.4	T27F6.4	WBGene00012104	chrI	chrI:12484170-12486450	67.9986	18.1314	-1.90702	0.0277334	yes
T28A11.13	T28A11.13	WBGene00020875	chrV	chrV:3249740-3250203	1.36883	48.5825	5.14942	0.00178762	yes
T28B8.1	T28B8.1	WBGene00012113	chrI	chrI:8133885-8135034	2.78817	14.648	2.39331	0.0163768	yes
T28C6.7	T28C6.7	WBGene00012121	chrIV	chrIV:8827790-8830673	0.84301	19.3578	4.52122	7.18e-05	yes
T28C6.9	T28C6.9	WBGene00044793	chrIV	chrIV:8831599-8840669	0.804541	15.9835	4.31227	8.89e-08	yes
T28D6.4	T28D6.4	WBGene00012124	chrIII	chrIII:11360355-11366075	0.744604	3.93025	2.40008	0.0356025	yes
T28F2.2	T28F2.2	WBGene00020901	chrI	chrI:3637355-3638797	0.836738	6.6652	2.9938	0.0461854	yes
T28F3.4	T28F3.4	WBGene00012130	chrIV	chrIV:17288133-17291696	0.324868	4.67084	3.84576	0.0155769	yes
T28F4.1	T28F4.1	WBGene00012136	chrI	chrI:7473049-7476942	0.524693	6.54704	3.6413	0.0159584	yes
T28F4.5	T28F4.5	WBGene00012140	chrI	chrI:7492040-7494696	6.50647	53.4119	3.03721	0.0159159	yes
Y39E4A.3	Y39E4A.3	WBGene00012713	chrIII	chrIII:12967840-12972397	56.0892	11.5886	-2.27502	0.0287896	yes
VH15N14R.1	VH15N14R.1	WBGene00012151	chrI	chrI:7781172-7782543	0.423836	5.23949	3.62785	0.0404561	yes
W02D9.10	W02D9.10	WBGene00012216	chrI	chrI:12551527-12552334	1.26249	11.7904	3.22327	0.0109487	yes
W02D9.4	W02D9.4	WBGene00012210	chrI	chrI:12537696-12538945	91.4341	12.6906	-2.84898	0.000113062	yes
W03A5.1	W03A5.1	WBGene00020966	chrIII	chrIII:5408070-5413138	0.48082	29.4871	5.93844	8.13e-09	yes
W03A5.2	W03A5.2	WBGene00020967	chrIII	chrIII:5406076-5407929	4.51885	55.4086	3.61608	7.73e-05	yes
W03F8.10	W03F8.10	WBGene00020998	chrIV	chrIV:5180180-5183700	0.67737	12.9592	4.25789	1.49e-05	yes
W03G9.8	W03G9.8	WBGene00044431	chrI	chrI:4957776-4958310	431.908	119.848	-1.84951	0.0290717	yes
W04G3.5	W04G3.5	WBGene00012258	chrX	chrX:11073591-11076071	1.0612	11.2272	3.40323	0.00123664	yes
W05E10.1	W05E10.1	WBGene00012280	chrV	chrV:11689403-11691678	0.123214	3.3689	4.77304	0.00879462	yes
W05G11.2	W05G11.2	WBGene00021040	chrIII	chrIII:57700-58681	163.832	52.3345	-1.64639	0.0499692	yes
W05H12.2	W05H12.2	WBGene00012290	chrI	chrI:13411785-13412868	0.48635	10.7176	4.46184	0.00185002	yes
W05H9.1	W05H9.1	WBGene00021048	chrX	chrX:6272050-6273733	0.802165	14.0809	4.1337	0.000123458	yes
W05H9.2	W05H9.2	WBGene00021049	chrX	chrX:6267012-6271015	4.49357	56.4226	3.65034	2.47e-06	yes
W05H9.3	W05H9.3	WBGene00021050	chrX	chrX:6252239-6253743	0.937229	12.6589	3.75561	0.000548998	yes
W05H9.4	W05H9.4	WBGene00021051	chrX	chrX:6263611-6266873	2.35691	26.4018	3.48567	1.59e-05	yes
W06D11.1	W06D11.1	WBGene00012299	chrX	chrX:12293698-12295243	1.59107	10.5483	2.72894	0.0477188	yes
W06D11.3	W06D11.3	WBGene00012301	chrX	chrX:12298622-12299951	0.121627	12.9901	6.7388	0.00687097	yes
W06H8.6	W06H8.6	WBGene00021068	chrV	chrV:6224027-6226993	1.60291	28.2766	4.14084	4.93e-05	yes
W07E11.1	W07E11.1	WBGene00012326	chrX	chrX:10083946-10104004	2.04774	101.547	5.63197	3.53e-13	yes
W08A12.4	W08A12.4	WBGene00021081	chrV	chrV:3674601-3676619	0.496723	85.1619	7.42162	2.83e-09	yes
W09C3.3	W09C3.3	WBGene00021111	chrI	chrI:4707905-4708763	5.37038	27.3127	2.34648	0.0268094	yes
W09D6.4	W09D6.4	WBGene00012357	chrIII	chrIII:11079692-11080274	4.65555	27.523	2.56361	0.0328357	yes
W10D9.2	W10D9.2	WBGene00021130	chrII	chrII:449153-453148	14.1573	3.10209	-2.19023	0.0376983	yes
Y102A5C.2	Y102A5C.2	WBGene00013611	chrV	chrV:16918785-16919523	222.855	53.6	-2.0558	0.00961725	yes
Y102A5C.36	Y102A5C.36	WBGene00044213	chrV	chrV:16926962-16927827	183.243	44.7894	-2.03253	0.0119004	yes
Y102A5D.1	Y102A5D.1	WBGene00013630	chrV	chrV:17142180-17143861	19.8263	3.74603	-2.40398	0.00565138	yes
Y105C5A.1	Y105C5A.1	WBGene00013632	chrIV	chrIV:15550821-15554688	1.89823	16.8558	3.15051	0.000440241	yes
Y105C5A.14	Y105C5A.14	WBGene00013638	chrIV	chrIV:15646121-15648080	2.74605	35.7354	3.70192	6.72e-05	yes
Y105C5B.19	Y105C5B.19	WBGene00013658	chrIV	chrIV:15981540-15983938	1.29928	6.59671	2.34404	0.0318285	yes
Y105C5B.20	Y105C5B.20	WBGene00013659	chrIV	chrIV:15993650-15994411	1.94167	19.3495	3.31692	0.00551766	yes
Y106G6D.1	Y106G6D.1	WBGene00013698	chrI	chrI:10107381-10108989	0.81682	19.1168	4.54868	3.63e-05	yes
Y106G6G.2	Y106G6G.2	WBGene00013711	chrI	chrI:10323606-10327748	2.82324	13.2425	2.22975	0.0106729	yes
Y106G6G.6	Y106G6G.6	WBGene00013715	chrI	chrI:10319659-10321484	0.722149	6.49889	3.16983	0.00940009	yes
Y111B2A.20	Y111B2A.20	WBGene00013740	chrIII	chrIII:12711458-12713773	41.0221	11.3139	-1.8583	0.0302923	yes
Y116A8A.6	Y116A8A.6	WBGene00013776	chrIV	chrIV:16826290-16827984	8.27581	1.77731	-2.21921	0.0195579	yes
Y119C1B.1	Y119C1B.1	WBGene00022467	chrI	chrI:4554150-4555204	0.120498	3.75267	4.96084	0.0499692	yes
Y119C1B.10	Y119C1B.10	WBGene00022475	chrI	chrI:4555402-4556812	1.5947	65.2379	5.35435	8.67e-07	yes
Y119C1B.5	Y119C1B.5	WBGene00022471	chrI	chrI:4511440-4516084	0.575605	32.3385	5.81203	1.9e-09	yes
Y11D7A.14	Y11D7A.14	WBGene00012437	chrIV	chrIV:9274529-9283098	0.173611	1.44305	3.05519	0.0174517	yes
Y14H12B.2	Y14H12B.2	WBGene00021192	chrII	chrII:3932179-3933742	127.381	38.6162	-1.72187	0.0410407	yes
Y17G9B.8	Y17G9B.8	WBGene00021205	chrIV	chrIV:4757172-4758700	112.723	35.7328	-1.65746	0.0486878	yes
Y2H9A.4	Y2H9A.4	WBGene00012381	chrV	chrV:13446002-13448801	0.211908	41.1896	7.6027	1.3e-08	yes
Y2H9A.6	Y2H9A.6	WBGene00086568	chrV	chrV:13444101-13445041	0.400643	71.0003	7.46937	1e-05	yes
Y32F6A.4	Y32F6A.4	WBGene00012529	chrV	chrV:10428703-10433581	0.08257	2.14652	4.70023	0.0292392	yes
Y32H12A.7	Y32H12A.7	WBGene00021315	chrIII	chrIII:5382262-5385368	196.596	60.5445	-1.69916	0.0438978	yes
Y32H12A.8	Y32H12A.8	WBGene00021316	chrIII	chrIII:5385486-5404946	3.70795	23.5437	2.66665	0.00066012	yes
Y34B4A.11	Y34B4A.11	WBGene00045435	chrX	chrX:5283184-5283687	14.9844	113.06	2.91555	0.0145484	yes
Y34B4A.2	Y34B4A.2	WBGene00021319	chrX	chrX:5279496-5281122	6.81834	39.7136	2.54214	0.00449622	yes
Y34B4A.7	Y34B4A.7	WBGene00021323	chrX	chrX:5244304-5246895	1.12486	22.0895	4.29554	2.81e-05	yes
Y34B4A.8	Y34B4A.8	WBGene00021324	chrX	chrX:5271810-5275250	0.465408	5.15689	3.46993	0.00168376	yes
Y34F4.5	Y34F4.5	WBGene00021340	chrIII	chrIII:1026904-1028404	37.8664	8.81569	-2.10277	0.0214353	yes
Y37A1B.17	Y37A1B.17	WBGene00044989	chrIV	chrIV:13964341-13979814	0.649039	12.2481	4.23811	0.000385004	yes
Y37D8A.2	Y37D8A.2	WBGene00012544	chrIII	chrIII:12818622-12825547	91.5358	16.1093	-2.50644	0.00199854	yes
Y37F4.6	Y37F4.6	WBGene00021387	chrI	chrI:10870026-10873996	2.62166	23.1581	3.14297	0.000517726	yes
Y37H9A.5	Y37H9A.5	WBGene00014871	chrI	chrI:13796168-13796878	365.457	90.2265	-2.01808	0.013981	yes
Y38A10A.2	Y38A10A.2	WBGene00021389	chrV	chrV:6057392-6060182	0.0391104	2.95243	6.23821	0.0343034	yes
Y38C1AB.4	Y38C1AB.4	WBGene00021406	chrIV	chrIV:32952-47184	0.116285	3.80333	5.03152	0.00022782	yes
Y38F1A.1	Y38F1A.1	WBGene00012605	chrII	chrII:12952420-12954717	0.498211	30.8322	5.95154	2.78e-06	yes
Y38F1A.2	Y38F1A.2	WBGene00012606	chrII	chrII:12954910-12957935	0.948272	13.973	3.8812	0.000788407	yes
Y38F1A.6	Y38F1A.6	WBGene00012608	chrII	chrII:12994288-12996278	1.06022	10.2079	3.26725	0.00205096	yes
Y38H8A.3	Y38H8A.3	WBGene00012637	chrIV	chrIV:13472481-13473955	0.255878	8.2252	5.00652	0.00153562	yes
Y38H8A.4	Y38H8A.4	WBGene00012638	chrIV	chrIV:13470541-13472239	0.205554	11.2931	5.77978	0.000454074	yes
Y38H8A.7	Y38H8A.7	WBGene00012640	chrIV	chrIV:13455292-13456124	156.732	36.8597	-2.08819	0.00950404	yes
Y39A1A.9	Y39A1A.9	WBGene00012648	chrIII	chrIII:10629978-10633402	0.174072	2.416	3.79486	0.0287896	yes
Y39B6A.11	Y39B6A.11	WBGene00012673	chrV	chrV:19127500-19130909	44.7232	8.02305	-2.4788	0.00163634	yes
Y39B6A.13	Y39B6A.13	WBGene00012675	chrV	chrV:19118483-19119338	197.094	48.5566	-2.02114	0.0143391	yes
Y39B6A.25	Y39B6A.25	WBGene00012684	chrV	chrV:19026433-19031561	2.44693	0.109608	-4.48055	0.00689755	yes
Y39C12A.9	Y39C12A.9	WBGene00012710	chrIV	chrIV:12257671-12259170	1.48212	18.3782	3.63226	0.00209875	yes
Y39G10AR.15	Y39G10AR.15	WBGene00021471	chrI	chrI:2322077-2327254	29.8406	5.05607	-2.56119	0.000996406	yes
Y39H10B.2	Y39H10B.2	WBGene00044527	chrV	chrV:3668765-3670487	1.47325	91.1064	5.95048	8.16e-08	yes
Y40A1A.1	Y40A1A.1	WBGene00021483	chrX	chrX:2000939-2002483	0.357117	5.97687	4.06492	0.029724	yes
Y40A1A.3	Y40A1A.3	WBGene00021485	chrX	chrX:1995569-1998106	0.19195	7.11032	5.21111	0.00285402	yes
Y41D4A.7	Y41D4A.7	WBGene00021509	chrIV	chrIV:1756583-1761684	9.48838	1.7871	-2.40854	0.0309897	yes
Y42A5A.1	Y42A5A.1	WBGene00012776	chrV	chrV:11088135-11097952	0.25159	2.59184	3.36483	0.00626003	yes
Y42H9B.3	Y42H9B.3	WBGene00021541	chrIV	chrIV:8011017-8012417	133.399	36.2464	-1.87984	0.0217255	yes
Y43B11AL.1	Y43B11AL.1	WBGene00021542	chrIV	chrIV:7065384-7068024	0.186552	2.76378	3.88899	0.0468794	yes
Y43F8B.2	Y43F8B.2	WBGene00012813	chrV	chrV:19503081-19533080	3.84731	55.0118	3.83782	0.000708498	yes
Y44A6D.3	Y44A6D.3	WBGene00012854	chrV	chrV:20789439-20792380	0.925107	6.38261	2.78646	0.0437045	yes
Y44E3A.3	Y44E3A.3	WBGene00021548	chrI	chrI:3317977-3318586	268.737	80.9742	-1.73066	0.0370773	yes
Y45G12B.3	Y45G12B.3	WBGene00021564	chrV	chrV:2688608-2694366	54.2899	15.9508	-1.76706	0.0325848	yes
Y45G5AM.3	Y45G5AM.3	WBGene00021556	chrV	chrV:4164829-4166744	4.65823	18.1142	1.95927	0.0399898	yes
Y46G5A.7	Y46G5A.7	WBGene00012899	chrII	chrII:12755147-12756125	0.470549	8.30994	4.14242	0.00468432	yes
Y47D3A.13	Y47D3A.13	WBGene00012926	chrIII	chrIII:11223346-11224004	8.35088	41.5204	2.31382	0.017662	yes
Y47D3B.4	Y47D3B.4	WBGene00012941	chrIII	chrIII:11405292-11409324	0.0589464	2.01698	5.09665	0.0492982	yes
Y47G6A.7	Y47G6A.7	WBGene00021637	chrI	chrI:3502740-3508427	16.8203	68.6145	2.02831	0.0217191	yes
Y47G7B.2	Y47G7B.2	WBGene00021654	chrII	chrII:2706000-2707987	49.7141	304.692	2.61562	0.00180962	yes
Y48B6A.10	Y48B6A.10	WBGene00012981	chrII	chrII:14214333-14217064	26.4553	8.21058	-1.688	0.0468794	yes
Y48G10A.1	Y48G10A.1	WBGene00013018	chrI	chrI:13489548-13491215	55.9206	15.868	-1.81726	0.0314805	yes
Y48G1A.1	Y48G1A.1	WBGene00021657	chrI	chrI:348537-357136	40.955	12.3031	-1.73502	0.0387045	yes
Y48G1C.6	Y48G1C.6	WBGene00021679	chrI	chrI:85044-86284	7.49599	37.4264	2.31986	0.0129103	yes
Y48G9A.11	Y48G9A.11	WBGene00021704	chrIII	chrIII:2112403-2116887	22.0426	3.37432	-2.70762	0.000751306	yes
Y49A10A.2	Y49A10A.2	WBGene00044949	chrX	chrX:10371163-10372292	0.664059	27.0646	5.34895	0.000191401	yes
Y49F6A.1	Y49F6A.1	WBGene00021711	chrII	chrII:3603389-3607387	0.0406173	0.958523	4.56065	0.032089	yes
Y49F6A.5	Y49F6A.5	WBGene00021713	chrII	chrII:3607939-3609864	1.63928	17.5573	3.42094	0.000783181	yes
Y49F6B.8	Y49F6B.8	WBGene00021720	chrII	chrII:3479475-3480566	5.25069	0.567794	-3.20907	0.018515	yes
Y49F6B.9	Y49F6B.9	WBGene00021721	chrII	chrII:3493936-3499396	102.212	20.7826	-2.29811	0.00592028	yes
Y49F6C.8	Y49F6C.8	WBGene00021730	chrII	chrII:3369284-3370095	2.62626	67.0331	4.67379	1.79e-05	yes
Y4C6B.3	Y4C6B.3	WBGene00021157	chrIV	chrIV:5333989-5336103	0.0675636	4.71698	6.12547	0.0251275	yes
Y4C6B.5	Y4C6B.5	WBGene00021159	chrIV	chrIV:5319244-5325023	3.12503	43.5692	3.80137	4.88e-06	yes
Y51H4A.22	Y51H4A.22	WBGene00013116	chrIV	chrIV:16720681-16722703	1.37626	11.5866	3.07364	0.0107097	yes
Y52E8A.2	Y52E8A.2	WBGene00021795	chrII	chrII:4320851-4321555	230.536	46.2785	-2.31658	0.00264259	yes
Y53C12B.7	Y53C12B.7	WBGene00013146	chrII	chrII:9750451-9752245	25.5065	5.26709	-2.27578	0.0498128	yes
Y53F4B.16	Y53F4B.16	WBGene00013162	chrII	chrII:15052008-15055642	4.90245	0.748138	-2.71212	0.0450152	yes
Y53G8AL.1	Y53G8AL.1	WBGene00021799	chrIII	chrIII:3233092-3241254	13.614	4.05827	-1.74616	0.0373324	yes
Y54E2A.4	Y54E2A.4	WBGene00013189	chrII	chrII:14754592-14755232	116.39	35.0309	-1.73227	0.0485705	yes
Y54F10BM.3	Y54F10BM.3	WBGene00021858	chrIII	chrIII:2277267-2289956	10.1259	2.32708	-2.12145	0.0100254	yes
Y54F10BM.9	Y54F10BM.9	WBGene00021863	chrIII	chrIII:2295332-2304904	6.19999	24.5832	1.98733	0.0177012	yes
Y54G11A.7	Y54G11A.7	WBGene00013216	chrII	chrII:14297220-14301974	2.9529	83.1353	4.81526	2.84e-07	yes
Y55B1BR.2	Y55B1BR.2	WBGene00021912	chrIII	chrIII:434909-440135	1.46108	9.99059	2.77354	0.00198726	yes
Y55F3AM.10	Y55F3AM.10	WBGene00021927	chrIV	chrIV:1027810-1030024	36.891	5.53478	-2.73667	0.000539401	yes
Y55F3AM.11	Y55F3AM.11	WBGene00021928	chrIV	chrIV:1038670-1041008	16.1933	3.84422	-2.07464	0.0180626	yes
Y55F3BR.11	Y55F3BR.11	WBGene00044757	chrIV	chrIV:855724-857263	8.68745	0.706864	-3.61943	0.0216756	yes
Y56A3A.36	Y56A3A.36	WBGene00044233	chrIII	chrIII:11929788-11933538	31.4287	9.24722	-1.76499	0.0419895	yes
Y57A10B.1	Y57A10B.1	WBGene00013273	chrII	chrII:12358691-12366959	0.491651	4.03785	3.03788	0.0199488	yes
Y57G11B.1	Y57G11B.1	WBGene00013294	chrIV	chrIV:14549798-14551929	4.62914	74.9201	4.01654	6.69e-07	yes
Y57G11C.31	Y57G11C.31	WBGene00013321	chrIV	chrIV:14683013-14687372	0.413575	4.33437	3.3896	0.0167139	yes
Y57G11C.37	Y57G11C.37	WBGene00013326	chrIV	chrIV:14663643-14675109	0.735069	3.78601	2.36472	0.0359971	yes
Y57G7A.10	Y57G7A.10	WBGene00021973	chrII	chrII:1302504-1306143	105.609	32.8626	-1.68422	0.0388966	yes
Y59A8B.12	Y59A8B.12	WBGene00013349	chrV	chrV:18085601-18086190	209.984	46.1617	-2.18552	0.00940656	yes
Y59H11AR.2	Y59H11AR.2	WBGene00022010	chrIV	chrIV:8585528-8594584	0.686836	13.6716	4.31507	0.000751306	yes
Y62E10A.14	Y62E10A.14	WBGene00013380	chrIV	chrIV:13399075-13400484	168.58	24.577	-2.77806	0.000231662	yes
Y62E10A.19	Y62E10A.19	WBGene00013385	chrIV	chrIV:13405548-13408159	31.7051	8.02884	-1.98145	0.0288909	yes
Y66A7A.5	Y66A7A.5	WBGene00013425	chrIII	chrIII:11616658-11623869	89.8788	26.2142	-1.77763	0.035189	yes
Y66D12A.12	Y66D12A.12	WBGene00013438	chrIII	chrIII:11561050-11562555	0.356279	7.53523	4.40257	0.000683506	yes
Y67A10A.9	Y67A10A.9	WBGene00013458	chrIV	chrIV:14394110-14400326	0.184985	1.60485	3.11696	0.0382139	yes
Y67D8B.4	Y67D8B.4	WBGene00022063	chrIV	chrIV:3173568-3176112	0.27891	26.1794	6.55249	0.000387873	yes
Y69A2AR.3	Y69A2AR.3	WBGene00022075	chrIV	chrIV:2641307-2642114	253.741	67.7917	-1.90417	0.0216799	yes
Y6D1A.2	Y6D1A.2	WBGene00012396	chrII	chrII:11817490-11819785	1.88776	10.5958	2.48875	0.031727	yes
Y6E2A.4	Y6E2A.4	WBGene00012398	chrV	chrV:15712228-15715625	0.366711	15.697	5.4197	1.24e-05	yes
Y6E2A.5	Y6E2A.5	WBGene00012399	chrV	chrV:15716399-15718639	0.169891	33.6621	7.63038	2.59e-06	yes
Y6E2A.7	Y6E2A.7	WBGene00012400	chrV	chrV:15719824-15721273	0.0842472	33.3867	8.63043	0.00107039	yes
Y71A12B.12	Y71A12B.12	WBGene00013509	chrI	chrI:14004446-14008459	1.03876	17.3143	4.05902	1.49e-05	yes
Y71G12A.4	Y71G12A.4	WBGene00022140	chrI	chrI:1885206-1894865	5.3558	1.07001	-2.32348	0.0333841	yes
Y71H10B.1	Y71H10B.1	WBGene00022201	chrX	chrX:2834213-2840284	0.231536	4.6976	4.34262	0.00943448	yes
Y71H2AM.25	Y71H2AM.25	WBGene00044760	chrIII	chrIII:2802441-2803673	0.263026	4.65658	4.14599	0.0352745	yes
Y71H2B.8	Y71H2B.8	WBGene00022197	chrIII	chrIII:2579304-2580655	3.5306	28.778	3.02698	0.00162965	yes
Y73B6BL.19	Y73B6BL.19	WBGene00022240	chrIV	chrIV:6378270-6384011	0.20581	2.15042	3.38523	0.0415689	yes
Y73B6BL.27	Y73B6BL.27	WBGene00022248	chrIV	chrIV:6472212-6473208	9.10073	49.5664	2.44531	0.013946	yes
Y73C8B.2	Y73C8B.2	WBGene00022259	chrV	chrV:3193391-3195000	1.26487	6.99618	2.46757	0.040304	yes
Y73F8A.13	Y73F8A.13	WBGene00013522	chrIV	chrIV:15312071-15313980	2.9203	14.9436	2.35534	0.0251081	yes
Y75B12B.1	Y75B12B.1	WBGene00013567	chrV	chrV:15184688-15185789	66.1105	19.1266	-1.7893	0.029724	yes
Y76A2B.6	Y76A2B.6	WBGene00013578	chrIII	chrIII:13550598-13555233	46.6681	13.7189	-1.76627	0.0307426	yes
Y7A5A.6	Y7A5A.6	WBGene00012412	chrX	chrX:15797263-15799627	1.26921	22.0023	4.11565	0.0152024	yes
Y82E9BR.1	Y82E9BR.1	WBGene00022334	chrIII	chrIII:1458224-1466724	0.16536	2.56548	3.95555	0.0277188	yes
Y82E9BR.2	Y82E9BR.2	WBGene00022335	chrIII	chrIII:1439087-1443182	54.5277	16.3892	-1.73425	0.0341363	yes
Y95B8A.11	Y95B8A.11	WBGene00022390	chrI	chrI:889934-895102	37.6183	10.1083	-1.8959	0.0207205	yes
Y97E10C.1	Y97E10C.1	WBGene00022410	chrV	chrV:7728793-7730269	0.528504	8.36172	3.98381	0.00300061	yes
ZC116.3	ZC116.3	WBGene00013855	chrV	chrV:12611328-12628720	0.0806767	0.599086	2.89254	0.0269768	yes
ZC13.1	ZC13.1	WBGene00022502	chrX	chrX:877270-879811	1.04222	14.7254	3.82057	0.021211	yes
ZC190.10	ZC190.10	WBGene00022544	chrV	chrV:8695652-8696498	13.9466	1.12192	-3.63587	0.0225891	yes
ZC196.1	ZC196.1	WBGene00022545	chrV	chrV:8744107-8744884	0	16.5462	1.79769e+308	0.0283516	yes
ZC196.2	ZC196.2	WBGene00022546	chrV	chrV:8739414-8741973	0.179127	30.5745	7.41521	5.87e-05	yes
ZC196.3	ZC196.3	WBGene00022547	chrV	chrV:8736651-8738415	0.074168	59.7522	9.65398	4.28e-06	yes
ZC196.4	ZC196.4	WBGene00022548	chrV	chrV:8733365-8735673	0.0310926	23.5231	9.56329	0.00501643	yes
ZC196.5	ZC196.5	WBGene00022549	chrV	chrV:8729435-8732767	0.0471123	3.28908	6.12544	0.0214353	yes
ZC196.6	ZC196.6	WBGene00022550	chrV	chrV:8726505-8728872	0.351847	58.4416	7.3759	4.06e-08	yes
ZC204.2	ZC204.2	WBGene00022554	chrII	chrII:1663802-1665769	5.84117	21.5785	1.88527	0.039707	yes
ZC21.10	ZC21.10	WBGene00044443	chrIII	chrIII:8530001-8531044	4.61359	59.0853	3.67884	0.000467539	yes
ZC239.6	ZC239.6	WBGene00022569	chrII	chrII:3209480-3211379	0.839479	24.9252	4.89197	4.54e-07	yes
ZC250.2	ZC250.2	WBGene00022576	chrV	chrV:5793031-5794764	4.66718	18.993	2.02484	0.0403901	yes
ZC328.2	ZC328.2	WBGene00022592	chrI	chrI:6386169-6392526	0.421561	8.43845	4.32317	0.000366185	yes
ZC328.5	ZC328.5	WBGene00022594	chrI	chrI:6405883-6406938	0.286061	10.7912	5.23738	0.0274806	yes
ZC416.1	ZC416.1	WBGene00022608	chrIV	chrIV:3637074-3637589	1.92541	15.6265	3.02075	0.0442903	yes
ZC434.8	ZC434.8	WBGene00013894	chrI	chrI:10348043-10349370	304.125	54.4709	-2.48111	0.00119785	yes
ZC443.3	ZC443.3	WBGene00013898	chrV	chrV:12812300-12814107	1.28761	21.9703	4.09279	3.02e-05	yes
ZC443.4	ZC443.4	WBGene00013899	chrV	chrV:12816903-12819292	0.216146	7.73128	5.16063	0.000144832	yes
ZC449.3	ZC449.3	WBGene00022613	chrX	chrX:5017892-5021033	0.204674	8.37049	5.35391	0.022285	yes
ZC477.2	ZC477.2	WBGene00022617	chrIV	chrIV:7108209-7109901	0.156548	4.1148	4.71615	0.0200381	yes
ZC504.3	ZC504.3	WBGene00013917	chrX	chrX:10416640-10419691	6.87395	72.2095	3.39298	1.15e-05	yes
ZC581.3	ZC581.3	WBGene00022633	chrI	chrI:6651220-6655430	0.258672	2.47581	3.25871	0.0175723	yes
ZC84.3	ZC84.3	WBGene00013847	chrIII	chrIII:9185998-9192673	2.34645	23.0265	3.29475	9.61e-05	yes
ZK1053.4	ZK1053.4	WBGene00014199	chrI	chrI:13241652-13244719	0.0928805	1.62296	4.12711	0.042885	yes
ZK1055.5	ZK1055.5	WBGene00022846	chrV	chrV:6580862-6584373	0.890101	5.92207	2.73406	0.0348794	yes
ZK1098.3	ZK1098.3	WBGene00014220	chrIII	chrIII:9532350-9538614	0.388645	11.817	4.92627	4.47e-06	yes
ZK1098.9	ZK1098.9	WBGene00014225	chrIII	chrIII:9544366-9545784	18.7723	3.92641	-2.25732	0.0272598	yes
[truncated: 725 more rows]

## Sheet: Truseq_Fed_WT-L1_vs_nos-L1
test_id	gene_ID	Wormbase ID	locus	locus.1	wild-type L1 PGCs FPKM	nos-1/2 L1 PGCs FPKM	log2.fold_change.	q_value	significant
[truncated: 1,392 more rows]

[truncated: 4 more sheets: Truseq_Fed_L1_WT_vs_mes-2, Truseq_Fed_L1_WT_vs_mes-4, Truseq_starved_lin15B-resuce, Nugen_EMB_soma_vs_PGCs]
