# Supplementary material for: Nanos promotes epigenetic reprograming of the germline by down-regulation of the THAP transcription factor LIN-15B
Source: eLife. 2017 Nov 7;6:e30201. doi: 10.7554/eLife.30201 (PMC5734877; doi:10.7554/eLife.30201)
Supplement: Supplementary file 6. [file elife-30201-supp6.xlsx]

## Sheet: Strains generated by Cas9
Table S6. Strains generated by CRISPR/cas9
Strain	allele	description	Method	crRNA	repair template	final edit in the genome
JH3357	nos-2(ax3103)	Deletion of nos-2 ORF	Two crRNAs used to remove region between START and STOP codons. Cuts were repaired by ssODN	oCYL584 oCYL669	oCYL668	ttttgttcttcttgaaag-ATGTCTC----TCTTTCTAG CGATCG-aagatccaatttctc
JH3436	lin-15B(ax3104)	lin-15B prom::GFP-H2B::tbb-2 3'UTR	1 crRNA cut at 54bp after ATG. A fusion PCR product of flanking arm- GFP-H2B::tbb2 3'UTR::gpd-2/3 outrun::Ffirst 20aa of LIN-15B(recoded)-flanking arm was used as the repair template	oCYL823	PCR product using pSL270 as the template. pSL270 contains GFP-H2B::tbb23'UTR from pCFJ420 and gpd-2/3 outrun plus 60 nt lin-15B 5' sequence from gBLOCK4	tttttatattttcaggtaattATGCAAACGCTAAAAACAGCACGACTTACATCAAACCCGGCATCAATTCCGACT-GFP-H2B::lin-15B 3'UTR::gpd-2/3::ATGCAAACCTTGAAGACCGCCAGATTGACCAGCAATCCAGCCAGCATCCCAACCAGCTCC-AGTAGCAGTGCAATgtacgtttattc
JH3484	mes-3(ax3105)	mes-3::OLLAS	One crRNA targeting 3' end of mes-3. A ssODN was used for repair.	oCYL957	oCYL977	CGAGATATACCATCTTCTAAT- linker-OLLAS-TAGattatccccttttttc
Blue: inserted sequence.
Red: deleted sequence.
