# Supplementary material for: Nanos promotes epigenetic reprograming of the germline by down-regulation of the THAP transcription factor LIN-15B
Source: eLife. 2017 Nov 7;6:e30201. doi: 10.7554/eLife.30201 (PMC5734877; doi:10.7554/eLife.30201)
Supplement: Supplementary file 7. [file elife-30201-supp7.xlsx]

## Sheet: Sheet1
Supplemental Table S8
Library name	Accession number	Genotype	Stage of isoaltion	food condition	Temperature for culturing	sterility of progenies (RNAi effectness)	library preparation method	Used in analyses for Figure # in this study	# of mapped reads
Slee-78	GSM2690485	pgl::gfp	embryonic PGCs	n/a	25	⎼	SMART-seq V4	Figure 2, Figure 2-S1	44293112
Slee-79	GSM2690486	pgl::gfp	embryonic PGCs	n/a	25	⎼	SMART-seq V4	Figure 2, Figure 2-S1	41202698
Slee-80	GSM2690487	pgl::gfp;nos-1 (gv5);nos-2(RNAi)	embryonic PGCs	n/a	25	0.83	SMART-seq V4	Figure 2, Figure 2-S1	43776814
Slee-81	GSM2690488	pgl::gfp;nos-1 (gv5);nos-2(RNAi)	embryonic PGCs	n/a	25	0.78	SMART-seq V4	Figure 2, Figure 2-S1	59068199
Slee-82	GSM2690489	pgl::gfp;nos-1 (gv5);nos-2(RNAi)	embryonic PGCs	n/a	25	0.92	SMART-seq V4	Figure 2, Figure 2-S1	45900329
Slee-2	GSM2690490	pgl::gfp	embryonic PGCs	n/a	25	⎼	Ovation RNA-seq V2(NuGEN)	Figure 2-S1	59713922
Slee-4	GSM2690491	pgl::gfp	embryonic PGCs	n/a	25	⎼	Ovation RNA-seq V2(NuGEN)	Figure 2-S1	49972450
Slee-11	GSM2690492	pgl::gfp	embryonic PGCs	n/a	25	⎼	Ovation RNA-seq V2(NuGEN)	Figure 2-S1	44326841
Slee-1	GSM2690493	pgl::gfp	embryonic somatic cells	n/a	25	⎼	Ovation RNA-seq V2(NuGEN)	Figure 2-S1	47881197
Slee-3	GSM2690494	pgl::gfp	embryonic somatic cells	n/a	25	⎼	Ovation RNA-seq V2(NuGEN)	Figure 2-S1	52701116
Slee-12	GSM2690495	pgl::gfp	embryonic somatic cells	n/a	25	⎼	Ovation RNA-seq V2(NuGEN)	Figure 2-S1	56764561
Slee-83	GSM2690496	pgl::gfp	L1 PGCs	starved	25	⎼	SMART-seq V4	Figure 1,2	50639756
Slee-84	GSM2690497	pgl::gfp	L1 PGCs	starved	25	⎼	SMART-seq V4	Figure 1,2	51001391
Slee-85	GSM2690498	pgl::gfp;nos-1 (gv5);nos-2(RNAi)	L1 PGCs	starved	25	0.9	SMART-seq V4	Figure 1,2	35597614
Slee-86	GSM2690499	pgl::gfp;nos-1 (gv5);nos-2(RNAi)	L1 PGCs	starved	25	0.9	SMART-seq V4	Figure 1,2	41953288
Slee-44	GSM2690481	pgl::gfp	L1 PGCs	starved	20	⎼	Nextera (illumina) (ATAC-seq)	Figure 3	32052821
Slee-46	GSM2690482	pgl::gfp	L1 PGCs	starved	20	⎼	Nextera (illumina) (ATAC-seq)	Figure 3	32159762
Slee-45	GSM2690483	pgl::gfp;nos-1 (gv5);nos-2(RNAi)	L1 PGCs	starved	20	0.89	Nextera (illumina) (ATAC-seq)	Figure 3	29268142
Slee-48	GSM2690484	pgl::gfp;nos-1 (gv5);nos-2(RNAi)	L1 PGCs	starved	20	N/A	Nextera (illumina) (ATAC-seq)	Figure 3	30737261
Slee-32	GSM2690500	pgl::gfp	L1 PGCs	starved	20	⎼	Truseq (illumina)	Figure 3,6	17653384
Slee-33	GSM2690501	pgl::gfp	L1 PGCs	starved	20	⎼	Truseq (illumina)	Figure 3,6	20834000
Slee-34	GSM2690502	pgl::gfp	L1 PGCs	starved	20	⎼	Truseq (illumina)	Figure 3,6	16778830
Slee-50	GSM2690503	pgl::gfp	L1 PGCs	starved	20	⎼	Truseq (illumina)	Figure 3,6	37069588
Slee-51	GSM2690504	pgl::gfp;nos-1 (gv5);nos-2(RNAi)	L1 PGCs	starved	20	0.93	Truseq (illumina)	Figure 3,6	36043136
Slee-57	GSM2690505	pgl::gfp;nos-1 (gv5);nos-2(RNAi)	L1 PGCs	starved	20	0.7	Truseq (illumina)	Figure 3,6	19605362
Slee-35	GSM2690506	pgl::gfp	L1 PGCs	Fed	20	⎼	Truseq (illumina)	Figure 4, Figure 4-S1	14252505
Slee-36	GSM2690507	pgl::gfp	L1 PGCs	Fed	20	⎼	Truseq (illumina)	Figure 4, Figure 4-S1	40383412
Slee-37	GSM2690508	pgl::gfp	L1 PGCs	Fed	20	⎼	Truseq (illumina)	Figure 4, Figure 4-S1	16357647
Slee-38	GSM2690509	pgl::gfp;nos-1 (gv5);nos-2(RNAi)	L1 PGCs	Fed	20	0.83	Truseq (illumina)	Figure 4, Figure 4-S1	22874615
Slee-39	GSM2690510	pgl::gfp;nos-1 (gv5);nos-2(RNAi)	L1 PGCs	Fed	20	0.86	Truseq (illumina)	Figure 4, Figure 4-S1	27719255
Slee-42	GSM2690511	pgl::gfp; mes-4 (RNAi)	L1 PGCs	Fed	20	0.93	Truseq (illumina)	Figure 4	42896813
Slee-43	GSM2690512	pgl::gfp; mes-4 (RNAi)	L1 PGCs	Fed	20	0.98	Truseq (illumina)	Figure 4	26546205
Slee-40	GSM2690513	pgl::gfp; mes-2 (RNAi)	L1 PGCs	Fed	20	0.52	Truseq (illumina)	Figure 4-S2	16356877
Slee-41	GSM2690514	pgl::gfp; mes-2 (RNAi)	L1 PGCs	Fed	20	0.5	Truseq (illumina)	Figure 4-S2	11260602
Slee-52	GSM2690515	pgl::gfp;nos-1(gv5);nos-2(RNAi);lin-15B(RNAi)	L1 PGCs	starved	20	⎼	Truseq (illumina)	Figure 6, Figure 6-S3	42368785
Slee-53	GSM2690516	pgl::gfp;nos-1(gv5);nos-2(RNAi);lin-15B(RNAi)	L1 PGCs	starved	20	⎼	Truseq (illumina)	Figure 6, Figure 6-S3	38478916
