# Supplementary material for: Nanos promotes epigenetic reprograming of the germline by down-regulation of the THAP transcription factor LIN-15B
Source: eLife. 2017 Nov 7;6:e30201. doi: 10.7554/eLife.30201 (PMC5734877; doi:10.7554/eLife.30201)
Supplement: Supplementary file 8. — From purified embryonic cells, we identified 1347 PGC enriched genes (enrichment over somatic blastomeres). In this table, we cross-referenced our embryonic PGC enriched gene set with other published PGC or germline enriched gene sets. 392/1347 embryonic PGC enriched genes were identified as PGC enriched genes in Spencer et al., 2011- Supplementary file 2 (in which 979 genes with enriched expression in Z2/Z3); 700/1347 were characterized as either germline specific or germline enriched genes in Gaydos et al., 2012. [file elife-30201-supp8.xlsx]

## Sheet: merged_PGC_dataset
Table S9. List of genes enriched in embryonic Z2Z3.
This table contains joined information from: 1. embryonic PGC enriched genes from Supp_table S5; 2. Specer et al 2011. Supp file #2; 3. Gaydos et al 2012
							Spencer et al., 2011			Gaydos et al., 2013
Wormbase ID	Gene ID	locus	EMB_soma FPKM	EMB_PGCs FPKM	log2.fold_change.	q_value	Z2/Z2 enirched gene..Spencer	germline.expression..Reinke...	strictly.maternal.expression..Baugh...	germline.enriched..Gaydos	germline.specific..Gaydos
WBGene00007507	C10C5.3	chrIV:9374212-9376475	0.532857	5.80429	3.4453	0.0138506	0	0	0	0	0
WBGene00020146	T01C8.5	chrX:16791302-16793053	0.863924	23.264	4.75105	1.09614e-07	0	0	0	0	0
WBGene00011788	T15H9.2	chrII:9615943-9617064	0.131248	2.26754	4.11076	0.0412658	0	0	0	0	0
WBGene00001336	Y41E3.4	chrIV:15008472-15013151	4.99002	18.8366	1.91642	0.011627	0	0	0	0	0
WBGene00012465	Y17G7B.12	chrII:12023796-12025811	2.63071	10.6932	2.02317	0.0260287	0	0	0	0	0
WBGene00018818	F54D12.5	chrII:1369052-1372619	2.86647	11.0997	1.95317	0.030788	0	0	0	0	0
WBGene00013361	Y60A3A.13	chrV:19898048-19907405	1.99177	7.76552	1.96303	0.0479758	0	0	0	0	0
WBGene00001514	C05D2.5	chrIII:5604417-5610304	0.0553756	20.0923	8.50318	2.00917e-07	0	0	0	0	0
WBGene00012020	T25E12.5	chrV:16745086-16746240	4.04575	33.5593	3.05223	0.000181118	0	0	0	0	0
WBGene00001744	T10F2.1	chrIII:5159836-5163588	4.22446	16.9218	2.00205	0.00949821	0	0	0	0	0
WBGene00021905	Y55B1AL.3	chrIII:577843-587102	2.97936	12.6554	2.08668	0.0256144	0	0	0	0	0
WBGene00016868	C52B9.8	chrX:4297850-4303160	3.78436	21.0061	2.47269	0.000817983	0	0	0	0	0
WBGene00002153	C25A1.7	chrI:10179829-10183987	0.756545	6.65497	3.13693	7.7486e-05	0	0	0	0	0
WBGene00021201	Y17G9B.4	chrIV:4752110-4753155	0.0757766	5.92134	6.28803	0.00106666	0	0	0	0	0
WBGene00003074	ZK524.3	chrI:7457148-7460752	0.643966	3.12241	2.2776	0.0191788	0	0	0	0	0
WBGene00009223	F28F8.5	chrI:7057168-7059326	5.27224	70.8272	3.74782	0.000181303	0	0	0	0	0
WBGene00019890	R05F9.6	chrII:4889431-4891424	0.254283	2.27292	3.16004	0.00530877	0	0	0	0	0
WBGene00004049	Y71F9AL.18	chrI:2903597-2924717	4.44686	22.39	2.33199	0.00465917	0	0	0	0	0
WBGene00004050	E02H1.4	chrII:9592976-9595068	3.591	16.6645	2.21432	0.00463869	0	0	0	0	0
WBGene00004053	ZK1005.1	chrV:1276420-1285700	0.825943	8.35177	3.33797	1.76646e-05	0	0	0	0	0
WBGene00019876	R05D3.1	chrIII:8381643-8387427	0.879236	3.97554	2.17683	0.0076489	0	0	0	0	0
WBGene00004680	C29H12.1	chrII:6125529-6127910	0.593052	8.48413	3.83854	5.20672e-05	0	0	0	0	0
WBGene00008133	C47B2.7	chrI:12978827-12982429	0.816155	5.2265	2.67893	0.0432568	0	0	0	0	0
WBGene00006374	T01B11.3	chrIV:8457275-8458859	0.0274796	1.7092	5.95882	0.015084	0	0	0	0	0
WBGene00020132	T01A4.2	chrI:4481238-4484425	1.10047	6.11932	2.47525	0.0236012	0	0	0	0	0
WBGene00006489	ZK856.9	chrV:10210471-10212101	4.25534	15.9617	1.90727	0.018452	0	0	0	0	0
WBGene00006490	F36H1.2	chrIV:11038640-11047391	2.33827	9.90335	2.08247	0.0155259	0	0	0	0	0
WBGene00006492	C27A12.3	chrI:6038407-6041271	3.19959	13.563	2.08372	0.00985689	0	0	0	0	0
WBGene00004959	Y110A7A.12	chrI:5101755-5103404	0.237753	3.02703	3.67037	0.00221968	0	0	0	0	0
WBGene00014114	ZK856.13	chrV:10206592-10210319	6.16378	18.8166	1.61012	0.0452151	0	0	0	0	0
WBGene00077732	C30B5.1	chrII:6198699-6208157	0.182812	8.72191	5.57621	2.07213e-07	0	0	0	0	0
WBGene00007732	C25G4.4	chrIV:12452077-12454192	0.0286267	4.75568	7.37615	0.000121688	0	0	0	0	0
WBGene00012713	Y39E4A.3	chrIII:12967840-12972397	2.11033	9.2686	2.13488	0.0343751	0	0	0	0	0
WBGene00012160	VY35H6BL.1	chrX:22434-24953	2.81008	10.5286	1.90564	0.031098	0	0	0	0	0
WBGene00000064	T04C12.5	chrV:11076724-11078136	116.547	489.562	2.07058	0.0454249	0	0	0	0	0
WBGene00000107	F54D8.3	chrIII:5077724-5080625	0.775626	11.7261	3.91822	0.000144319	0	0	0	0	0
WBGene00000121	F23B2.6	chrIV:9147455-9148567	7.4038	35.8573	2.27593	0.00490656	0	0	0	yes	0
WBGene00000143	K06H7.6	chrIII:8080546-8085449	1.98836	9.56685	2.26647	0.00746996	0	0	0	yes	yes
WBGene00000144	F15H10.3	chrV:10425340-10426363	0.0105599	7.57068	9.48568	0.00836605	Z2/Z3 enirhced	intrinsic	strictly maternal	yes	yes
WBGene00000155	W03G9.4	chrI:4964674-4967086	1.87102	14.1288	2.91674	0.000221718	Z2/Z3 enirhced		strictly maternal	0	0
WBGene00000168	K08D9.3	chrV:3210188-3223150	1.93257	7.88521	2.02863	0.010667	0	0	0	0	0
WBGene00000206	F35G12.10	chrIII:4594510-4595912	3.69708	18.713	2.33958	0.00321371	Z2/Z3 enirhced	intrinsic	strictly maternal	yes	0
WBGene00000208	Y53F4B.15	chrII:15039326-15048828	4.44024	14.6044	1.71769	0.0359293	0	0	0	0	0
WBGene00000236	F57B10.11	chrI:6563707-6564454	3.42675	20.9769	2.61389	0.00568759	0	0	0	yes	0
WBGene00000250	C50B8.2	chrV:13568837-13570010	1.85747	20.2568	3.447	8.17793e-05	Z2/Z3 enirhced	oogenesis-enriched	strictly maternal	yes	0
WBGene00000254	K04F10.4	chrI:6342232-6358397	4.73139	27.2044	2.52351	0.0103878	0	0	0	0	0
WBGene00000274	F15D4.1	chrII:13200100-13215631	2.61091	10.5238	2.01103	0.00680022	0	0	0	yes	0
WBGene00000386	K06A5.7	chrI:6469387-6471953	3.23559	37.3101	3.52747	1.30886e-05	Z2/Z3 enirhced	oogenesis-enriched	na	yes	0
WBGene00000416	Y41D4B.13	chrIV:1597314-1601620	6.48239	23.6394	1.8666	0.0173679	0	0	0	0	0
WBGene00000465	C07G2.1	chrIII:4489325-4491366	0.312475	13.2093	5.40167	0.0343552	Z2/Z3 enirhced	oogenesis-enriched	strictly maternal	yes	yes
WBGene00000467	F52B5.5	chrI:8324112-8328845	1.74206	12.6163	2.85642	0.000535686	0	0	0	yes	0
WBGene00000473	F46F11.2	chrI:5619569-5620670	0.285437	26.9788	6.56251	5.79651e-08	Z2/Z3 enirhced	oogenesis-enriched	strictly maternal	yes	yes
WBGene00000474	M01E11.5	chrI:5571789-5572976	0.021176	23.8632	10.1381	1.26254e-05	Z2/Z3 enirhced	oogenesis-enriched	strictly maternal	yes	yes
WBGene00000479	C07H6.5	chrIII:7495253-7497768	41.3974	303.659	2.87484	0.00970569	0	0	0	yes	0
WBGene00000496	T25G3.2	chrI:7554996-7559531	0.295166	10.3881	5.13726	4.76375e-08	0	0	0	yes	0
WBGene00000499	Y60A3A.12	chrV:19909079-19915942	0.0899655	12.0917	7.07042	5.46158e-07	0	0	0	0	0
WBGene00000519	Y47D3A.4	chrIII:11154727-11168710	2.88375	8.76977	1.60459	0.0455718	0	0	0	0	0
WBGene00000536	ZC395.2	chrIII:5277854-5279294	4.99355	21.3765	2.09789	0.0124549	0	0	0	0	0
WBGene00000537	C07H6.6	chrIII:7508129-7518458	2.62767	8.40674	1.67776	0.0458535	0	0	0	0	0
WBGene00000592	F08H9.1	chrV:14457459-14459882	0.393235	34.0374	6.43558	9.24219e-11	Z2/Z3 enirhced	intrinsic	strictly maternal	yes	0
WBGene00000770	C40H1.1	chrIII:9322232-9324821	0.0843016	5.0175	5.89527	9.7258e-06	Z2/Z3 enirhced	intrinsic	strictly maternal	yes	0
WBGene00000772	B0414.5	chrI:5788637-5791755	0.0938435	8.81756	6.55398	4.90143e-08	Z2/Z3 enirhced	oogenesis-enriched	na	yes	yes
WBGene00000777	F43G9.9	chrI:8636115-8637955	0.79394	7.4304	3.22634	0.00253883	Z2/Z3 enirhced	intrinsic	strictly maternal	yes	0
WBGene00000787	C41D11.8	chrI:4446593-4448464	2.41072	19.3371	3.00384	0.000289396	0	0	0	0	0
WBGene00000796	C14A4.4	chrII:10587982-10592593	4.62948	17.798	1.94279	0.024267	0	0	0	yes	0
WBGene00000797	AH9.2	chrX:2256081-2258073	1.19887	8.30858	2.79293	0.00855035	0	0	0	0	0
WBGene00000830	Y54G11A.6	chrII:14303483-14306217	0.418634	2.4459	2.5466	0.0190525	0	0	0	0	0
WBGene00000834	Y76A2A.2	chrIII:13439626-13455206	3.47352	11.5686	1.73575	0.0189824	0	0	0	0	0
WBGene00000866	Y43E12A.1	chrIV:10985963-10987405	0.0631557	12.1616	7.5892	7.9492e-06	0	0	0	yes	0
WBGene00000867	H31G24.4	chrI:4114862-4116371	0.096224	8.13199	6.40107	4.24757e-05	Z2/Z3 enirhced		na	0	0
WBGene00000885	T27D1.1	chrIII:3697870-3699615	0.0162785	13.0286	9.6445	0.00117138	0	0	0	yes	0
WBGene00000923	K07H8.3	chrIV:8290259-8291477	15.9393	52.2521	1.7129	0.0283944	0	0	0	0	0
WBGene00000935	F56D1.7	chrII:5456287-5458588	0.211434	27.6705	7.032	6.81703e-10	Z2/Z3 enirhced	oogenesis-enriched	strictly maternal	yes	0
WBGene00000975	K08F4.9	chrIV:10145226-10146203	1.34481	6.76228	2.3301	0.019452	Z2/Z3 enirhced		na	0	0
WBGene00000976	F36H9.3	chrV:1765836-1771727	50.782	162.331	1.67655	0.0369909	0	0	0	0	0
WBGene00001005	T26A5.9	chrIII:6462854-6463727	12.619	73.5449	2.54303	0.000812521	0	0	0	0	0
WBGene00001016	F43G6.1	chrII:11778087-11782162	6.64354	21.7412	1.71041	0.0260254	0	0	0	0	0
WBGene00001029	F38A5.13	chrIV:6585859-6588173	9.88555	33.3015	1.75219	0.0320072	0	0	0	yes	0
WBGene00001040	T23B12.7	chrV:8461074-8462086	2.728	19.2458	2.81863	0.00112218	0	0	0	yes	0
WBGene00001044	Y39C12A.8	chrIV:12251225-12252626	0	1.23113	1.79769e+308	0.0428362	0	0	0	0	0
WBGene00001046	Y54E10BL.4	chrI:2996407-3001300	0.650924	5.0009	2.94163	0.00217529	0	0	0	0	0
WBGene00001049	F33H2.1	chrI:15017271-15022969	7.56176	23.0474	1.60781	0.0367803	0	0	0	yes	0
WBGene00001050	F54C1.2	chrI:5003450-5004932	1.35508	5.21106	1.9432	0.0442934	0	0	0	yes	0
WBGene00001056	K02F2.1	chrI:6838352-6843342	5.61315	21.013	1.9044	0.0193873	0	0	0	0	0
WBGene00001090	F15B10.2	chrIV:6607368-6613342	0.13459	5.21893	5.27711	1.39119e-06	0	0	0	0	0
WBGene00001111	F29C4.5	chrIV:112409-114957	0.080853	1.12127	3.79369	0.0175202	0	0	0	0	0
WBGene00001112	Y106G6H.12	chrI:10464318-10471047	3.92909	13.7129	1.80327	0.0190353	0	0	0	yes	0
WBGene00001214	F26A3.3	chrI:7650413-7656332	0.109824	11.1338	6.66361	1.37579e-11	Z2/Z3 enirhced	intrinsic	na	yes	0
WBGene00001232	Y74C10AR.1	chrI:2485870-2489717	6.15942	19.9519	1.69566	0.0320072	0	0	0	yes	0
WBGene00001262	K10D2.6	chrIII:5188697-5199640	7.4905	41.7785	2.47963	0.0165501	0	0	0	0	0
WBGene00001320	ZK809.4	chrIV:11652377-11655447	10.0962	62.0802	2.62032	0.00868064	0	0	0	yes	0
WBGene00001332	T07A9.5	chrIV:415653-419958	2.13693	7.46122	1.80387	0.0418843	0	0	0	yes	0
WBGene00001371	F26H11.5	chrII:14412124-14413389	1.88008	11.9469	2.66777	0.00451221	Z2/Z3 enirhced	mixed_spermatogenesis-somatic	strictly maternal	0	0
WBGene00001393	Y67H2A.8	chrIV:13315617-13318759	4.34937	32.3338	2.89416	9.17148e-05	Z2/Z3 enirhced		na	0	0
WBGene00001401	H12I13.4	chrII:6078389-6080785	0.0306985	2.68201	6.449	0.000375132	0	0	0	0	yes
WBGene00001402	F21H12.5	chrII:6088844-6091452	0.0544626	1.81773	5.06073	0.000990875	0	0	0	yes	yes
WBGene00001411	F35D6.1	chrIV:5533136-5537921	4.64236	14.1669	1.6096	0.0391014	0	0	0	0	0
WBGene00001412	T19C3.8	chrIII:632025-634623	2.18374	22.6493	3.37459	2.11358e-05	Z2/Z3 enirhced	oogenesis-enriched	na	yes	0
WBGene00001413	C01F6.4	chrIV:9104950-9107594	1.21813	13.5651	3.47716	2.35508e-05	0	0	0	yes	0
WBGene00001481	Y54E10A.4	chrI:3211047-3222952	0.289562	8.84625	4.93312	0.000614342	Z2/Z3 enirhced		strictly maternal	0	yes
WBGene00001482	Y113G7B.5	chrV:20199230-20200544	0.170667	21.6045	6.984	0.0277695	Z2/Z3 enirhced	intrinsic	strictly maternal	yes	yes
WBGene00001483	C03C11.2	chrI:10016767-10018027	0	1.59282	1.79769e+308	0.0485871	0	0	0	yes	0
WBGene00001491	C24A11.8	chrI:5402897-5408347	11.2854	38.1243	1.75626	0.0378201	0	0	0	0	0
WBGene00001513	T05H4.14	chrV:6431313-6433479	4.2041	14.3691	1.7731	0.0264766	0	0	0	yes	0
WBGene00001527	F37B12.2	chrII:9035504-9038241	2.39504	11.3846	2.24896	0.00266139	0	0	0	0	0
WBGene00001571	K01C8.5	chrII:8273552-8275971	0.493743	26.886	5.76695	2.78757e-10	0	0	0	yes	0
WBGene00001595	T23G11.3	chrI:7695676-7698219	0.487944	55.1327	6.82005	6.01907e-13	Z2/Z3 enirhced	oogenesis-enriched	na	yes	yes
WBGene00001597	T07F8.3	chrII:7132600-7137417	0.159244	49.9189	8.29221	4.54132e-08	Z2/Z3 enirhced	intrinsic	strictly maternal	yes	yes
WBGene00001598	T21G5.3	chrI:6854686-6857528	1.36576	30.9907	4.50406	4.53353e-09	Z2/Z3 enirhced	intrinsic	na	yes	0
WBGene00001599	C55B7.1	chrI:6514021-6517508	0.115909	10.1138	6.44719	3.60316e-09	Z2/Z3 enirhced	oogenesis-enriched	strictly maternal	yes	yes
WBGene00001600	B0414.6	chrI:5792326-5795117	0.100201	6.3874	5.99426	9.03885e-07	0	0	0	yes	yes
WBGene00001601	T12F5.3	chrI:3726013-3731221	0.376444	12.1339	5.01046	3.20344e-09	Z2/Z3 enirhced		na	yes	0
WBGene00001606	F26D10.10	chrIV:17272219-17273615	1.27248	9.54358	2.90689	0.00133784	Z2/Z3 enirhced	oogenesis-enriched	strictly maternal	yes	yes
WBGene00001607	C28D4.3	chrIV:9739306-9740878	1.02776	21.7029	4.40032	9.03885e-07	Z2/Z3 enirhced	oogenesis-enriched	strictly maternal	yes	0
WBGene00001609	F02A9.6	chrIII:9092163-9099606	1.94696	16.6939	3.10003	0.000107297	Z2/Z3 enirhced	oogenesis-enriched	strictly maternal	yes	0
WBGene00001628	ZK688.8	chrIII:7914250-7917704	4.37536	17.4899	1.99905	0.0101814	0	0	0	0	0
WBGene00001639	M01F1.1	chrIII:3490405-3493219	0.0839626	1.83179	4.44736	0.0212551	0	0	0	0	0
WBGene00001645	C03E10.4	chrV:11282553-11286021	2.99825	43.0424	3.84357	9.18661e-07	0	0	0	yes	0
WBGene00001647	T23G11.2	chrI:7699540-7700958	0.043674	2.24035	5.68081	0.00728484	0	0	0	yes	0
WBGene00001662	C34E10.1	chrIII:5260654-5263797	11.4588	64.5254	2.4934	0.000985959	0	0	0	0	0
WBGene00001678	Y95B8A.5	chrI:897288-905907	10.3627	104.115	3.3287	1.8197e-05	Z2/Z3 enirhced		na	0	yes
WBGene00001683	T09F3.3	chrII:10394053-10395287	0.54206	7.34034	3.75932	0.000431672	0	0	0	yes	0
WBGene00001686	F33H1.2	chrII:10171212-10172432	0.558252	7.04071	3.65673	0.000715562	0	0	0	yes	0
WBGene00001740	ZC395.6	chrIII:5265073-5267104	2.9742	10.6851	1.84503	0.0228804	0	0	0	yes	yes
WBGene00001749	R107.7	chrIII:9059249-9060106	6.43706	23.7209	1.88169	0.0211399	0	0	0	0	0
WBGene00001793	Y46G5A.31	chrII:12866383-12878035	0.914832	22.8795	4.64441	4.54132e-08	Z2/Z3 enirhced	mixed_oogenesis-somatic	na	0	0
WBGene00001813	F57A10.3	chrV:15760427-15766157	2.97393	16.524	2.47412	0.00131353	0	0	0	0	0
WBGene00001855	C18G1.5	chrV:4754298-4755455	2.27508	90.1767	5.30876	6.57383e-10	Z2/Z3 enirhced	oogenesis-enriched	strictly maternal	yes	0
WBGene00001856	B0414.3	chrI:5774587-5775613	4.44915	200.499	5.49392	7.15491e-10	Z2/Z3 enirhced	oogenesis-enriched	strictly maternal	yes	0
WBGene00001862	ZK381.1	chrIV:6977507-6978747	0.603068	19.8953	5.04396	8.70978e-07	Z2/Z3 enirhced	oogenesis-enriched	strictly maternal	yes	0
WBGene00001864	D1086.4	chrV:14090798-14092417	0	2.87614	1.79769e+308	0.0241769	0	0	0	0	0
WBGene00001867	T07G12.12	chrIV:10561893-10563927	0.622437	6.68595	3.42513	0.00113628	0	0	0	yes	0
WBGene00001874	T09E8.2	chrV:13176696-13180160	5.44495	17.6425	1.69606	0.035632	0	0	0	yes	0
WBGene00001973	C32F10.5	chrI:5815675-5818128	0.550523	26.6373	5.5965	8.34922e-10	Z2/Z3 enirhced	oogenesis-enriched	strictly maternal	yes	0
WBGene00001977	Y17G7A.1	chrII:11916447-11935280	4.09429	79.2879	4.27542	1.63971e-07	Z2/Z3 enirhced	oogenesis-enriched	strictly maternal	yes	0
WBGene00001983	E04A4.4	chrIV:4739484-4744261	1.05181	16.463	3.96828	7.58653e-06	0	0	0	0	0
WBGene00001985	C18E3.8	chrI:4208593-4210342	0.525696	9.64967	4.19818	8.05435e-05	Z2/Z3 enirhced		strictly maternal	0	yes
WBGene00001998	F32A11.2	chrII:13153390-13156977	1.26676	11.3013	3.15728	0.000226691	Z2/Z3 enirhced		strictly maternal	0	yes
WBGene00002032	F41H10.10	chrIV:5390350-5391549	0.154187	10.5961	6.10271	8.56971e-06	Z2/Z3 enirhced	oogenesis-enriched	strictly maternal	yes	0
WBGene00002033	Y73B6BL.2	chrIV:6419495-6420888	1.03866	21.0155	4.33866	1.23964e-06	Z2/Z3 enirhced		na	0	0
WBGene00002034	F57C9.5	chrI:4827072-4829769	0.390971	22.1098	5.82148	3.46011e-10	Z2/Z3 enirhced	intrinsic	strictly maternal	yes	0
WBGene00002042	H26D21.1	chrI:3698109-3699303	0.137701	5.17992	5.23332	0.000433484	Z2/Z3 enirhced	intrinsic	strictly maternal	yes	0
WBGene00002059	F53A2.6	chrIII:13343472-13344509	2.14597	11.335	2.40108	0.00835921	Z2/Z3 enirhced	intrinsic	na	yes	0
WBGene00002063	Y57A10A.30	chrII:12280597-12284055	0.672859	14.7352	4.45281	2.82613e-05	Z2/Z3 enirhced	intrinsic	strictly maternal	yes	0
WBGene00002064	T05G5.10	chrIII:9745779-9747108	4.20136	22.4479	2.41765	0.00503122	Z2/Z3 enirhced	intrinsic	strictly maternal	yes	0
WBGene00002068	C27A2.3	chrII:5054068-5055327	8.81875	55.1853	2.64564	0.000708898	Z2/Z3 enirhced	intrinsic	strictly maternal	yes	0
WBGene00002072	T19B10.7	chrV:11239686-11241762	1.08973	4.60377	2.07884	0.0199853	0	0	0	yes	0
WBGene00002073	F26B1.3	chrI:6315232-6317269	0.963866	15.0518	3.96496	2.64998e-06	Z2/Z3 enirhced	oogenesis-enriched	strictly maternal	yes	0
WBGene00002143	Y47G6A.1	chrI:3611911-3618317	0.235411	6.77846	4.8477	2.0386e-05	Z2/Z3 enirhced		na	0	yes
WBGene00002144	Y47G6A.2	chrI:3608397-3611847	0.533029	12.7622	4.58152	1.85331e-06	Z2/Z3 enirhced		strictly maternal	yes	0
WBGene00002147	C41C4.4	chrII:8112213-8124788	1.61138	6.37034	1.98307	0.0156587	0	0	0	0	0
WBGene00002214	M7.2	chrIV:11084083-11086020	0.35116	10.9361	4.96083	5.73361e-07	0	0	0	yes	0
WBGene00002225	M01E11.6	chrI:5577057-5579302	0.51278	5.91143	3.5271	0.00017793	0	0	0	yes	yes
WBGene00002226	C41G7.2	chrI:9512443-9514747	1.37873	6.13757	2.15432	0.00891586	0	0	0	0	0
WBGene00002228	C06G3.2	chrIV:7040199-7043683	7.86135	23.8442	1.60079	0.0451207	0	0	0	yes	0
WBGene00002240	F58D5.4	chrI:12047702-12059789	1.10686	20.0286	4.17752	2.53375e-05	Z2/Z3 enirhced		na	0	0
WBGene00002263	K08H10.1	chrV:10020518-10031069	1.27847	6.62644	2.37382	0.0416576	0	0	0	0	0
WBGene00002368	K08E7.3	chrIV:12567832-12570582	0.561309	29.6457	5.72288	8.09995e-11	Z2/Z3 enirhced	oogenesis-enriched	strictly maternal	yes	yes
WBGene00002804	Y110A7A.19	chrI:5162608-5164889	3.11726	14.9765	2.26435	0.00293451	0	0	0	0	0
WBGene00002879	C29E4.8	chrIII:7948772-7951850	5.79346	28.3976	2.29327	0.00460809	Z2/Z3 enirhced		strictly maternal	0	0
WBGene00003010	B0001.1	chrIV:12129481-12135073	4.25445	53.8545	3.66202	9.86949e-06	0	0	0	0	0
WBGene00003026	C12C8.3	chrI:9335956-9342488	0.228002	6.66945	4.87045	2.78825e-07	0	0	0	yes	yes
WBGene00003030	Y73B6A.5	chrIV:6742527-6748413	7.55409	28.6346	1.92243	0.0168498	0	0	0	0	0
WBGene00003038	ZK673.3	chrII:10450613-10451882	2.47145	9.47127	1.9382	0.0307687	0	0	0	0	0
WBGene00003062	K09H9.6	chrI:3144429-3147795	3.43143	11.7773	1.77912	0.0264121	0	0	0	yes	0
WBGene00003177	T01E8.4	chrII:10236879-10239635	3.54252	13.4478	1.92453	0.0157288	0	0	0	0	0
WBGene00003184	F57B10.12	chrI:6564746-6565869	0.611255	15.2308	4.63908	1.06561e-05	Z2/Z3 enirhced	oogenesis-enriched	strictly maternal	yes	0
WBGene00003209	ZK858.4	chrI:9132530-9135742	7.50459	23.6654	1.65693	0.0324571	0	0	0	yes	0
WBGene00003220	R06A4.7	chrII:14383899-14388375	3.57131	13.0352	1.86789	0.0136076	0	0	0	0	0
WBGene00003225	T07C4.7	chrIII:10334172-10335072	18.4684	53.0152	1.52135	0.0477041	0	0	0	0	0
WBGene00003228	W03C9.7	chrII:11968572-11973627	0.349654	13.4496	5.2655	1.04422e-06	Z2/Z3 enirhced	intrinsic	strictly maternal	yes	0
WBGene00003230	W02A2.7	chrIV:13353698-13356080	1.65519	30.2251	4.19068	1.14253e-06	Z2/Z3 enirhced	oogenesis-enriched	na	yes	0
WBGene00003231	AH6.5	chrII:9524114-9526307	0.39242	8.9153	4.50581	7.61627e-06	0	0	0	yes	yes
WBGene00003373	T28A8.7	chrIII:13509198-13514470	2.57258	13.9555	2.43955	0.00139463	0	0	0	yes	yes
WBGene00003396	F52F12.3	chrI:9895683-9900808	3.92694	14.3195	1.86651	0.0140056	0	0	0	0	0
WBGene00003405	ZC302.1	chrV:10733911-10736824	2.15983	9.95117	2.20395	0.00428932	0	0	0	yes	0
WBGene00003413	Y43F8C.12	chrV:19674843-19692997	0.561648	9.77676	4.12162	4.04525e-07	0	0	0	0	0
WBGene00003418	H26D21.2	chrI:3694311-3697552	0.168237	13.7841	6.35636	2.82922e-09	Z2/Z3 enirhced	oogenesis-enriched	na	yes	0
WBGene00003420	T02G5.6	chrII:7078107-7078525	0.423939	7.84576	4.20999	0.0203408	0	0	0	yes	0
WBGene00003421	F09E8.3	chrIV:13155203-13164028	0.31197	8.75067	4.80992	1.45596e-08	0	0	0	yes	0
WBGene00003422	Y47G6A.11	chrI:3449328-3462172	2.56059	15.517	2.5993	0.000586206	0	0	0	yes	0
WBGene00003475	Y110A7A.5	chrI:5134769-5137960	5.40111	17.3029	1.67969	0.0298258	0	0	0	0	0
WBGene00003504	ZK1098.8	chrIII:9538946-9542271	3.70094	13.5191	1.86904	0.0128727	0	0	0	0	0
WBGene00003507	C14C11.6	chrV:5658759-5660688	0.131518	4.47428	5.08832	7.73267e-05	0	0	0	yes	0
WBGene00003586	F13H10.2	chrIV:11010008-11011999	1.44286	8.1924	2.50536	0.0467836	Z2/Z3 enirhced		na	0	0
WBGene00003622	C01H6.5	chrI:7214742-7221804	9.16764	41.5984	2.1819	0.0348205	0	0	0	yes	0
WBGene00003783	R03D7.7	chrII:10951818-10953105	0.0400725	68.3436	10.736	5.79971e-07	Z2/Z3 enirhced	oogenesis-enriched	strictly maternal	yes	0
WBGene00003784	ZK1127.1	chrII:7065009-7069924	1.10662	64.4537	5.86403	4.13584e-08	0	0	0	yes	0
WBGene00003795	F59A2.1	chrIII:3400629-3404468	16.6701	87.1415	2.3861	0.00769433	0	0	0	yes	0
WBGene00003802	Y56A3A.17	chrIII:11915790-11918621	8.46846	25.8629	1.61071	0.0436875	0	0	0	yes	0
WBGene00003829	F53A2.4	chrIII:13341425-13342506	2.52965	14.7712	2.54578	0.00228632	0	0	0	yes	0
WBGene00003835	C15H11.6	chrV:14415798-14417814	0.41532	18.7906	5.49964	4.34446e-07	Z2/Z3 enirhced	oogenesis-enriched	strictly maternal	yes	0
WBGene00003864	C09G9.6	chrIV:8888959-8890987	0.331386	9.18077	4.79203	8.74874e-06	0	0	0	yes	0
WBGene00003882	F59E10.1	chrII:10873870-10877797	10.4517	32.8309	1.65132	0.0326008	0	0	0	yes	0
WBGene00003884	M02B7.3	chrIV:3796330-3800456	0.321293	2.44068	2.92532	0.0313763	0	0	0	0	0
WBGene00003898	Y39A1C.2	chrIII:10858184-10866844	2.70703	8.1796	1.59532	0.0428321	0	0	0	0	0
WBGene00003922	C15H11.7	chrV:14421567-14422605	7.12704	27.8853	1.96813	0.0138492	0	0	0	yes	0
WBGene00003923	D1054.2	chrV:10770300-10771330	2.41938	12.4298	2.3611	0.00712524	Z2/Z3 enirhced	oogenesis-enriched	strictly maternal	yes	0
WBGene00003924	Y110A7A.14	chrI:5105112-5106207	16.0059	83.2548	2.37893	0.00226252	Z2/Z3 enirhced		na	0	0
WBGene00003926	F25H2.9	chrI:10566338-10567289	8.46077	73.5987	3.12082	0.000112039	Z2/Z3 enirhced	oogenesis-enriched	strictly maternal	yes	0
WBGene00003927	CD4.6	chrV:5583217-5584332	13.384	158.038	3.56169	5.18792e-06	0	0	0	yes	0
WBGene00003947	K08D12.1	chrIV:1708806-1709744	16.3418	48.9453	1.5826	0.0420586	0	0	0	yes	0
WBGene00003948	C47B2.4	chrI:12967204-12968271	4.22605	19.0522	2.17258	0.00681662	0	0	0	yes	0
WBGene00003949	Y38A8.2	chrII:4954493-4955423	14.7528	74.8238	2.34251	0.00238463	0	0	0	yes	0
WBGene00003950	T20F5.2	chrI:3908749-3910545	5.55858	42.6088	2.93836	0.000386121	Z2/Z3 enirhced	intrinsic	strictly maternal	yes	0
WBGene00003951	K05C4.1	chrI:14719155-14720468	5.11061	24.0879	2.23674	0.00442139	0	0	0	0	0
WBGene00003952	C02F5.9	chrIII:8243047-8244023	5.49731	33.7197	2.6168	0.00118231	Z2/Z3 enirhced	intrinsic	na	yes	0
WBGene00003953	F39H11.5	chrI:8695196-8696370	3.79258	18.7092	2.3025	0.00568759	0	0	0	yes	0
WBGene00003960	F54D5.1	chrII:11574873-11577192	0.181838	3.77208	4.37463	0.0495493	Z2/Z3 enirhced		strictly maternal	0	0
WBGene00003965	H42K12.1	chrX:1321347-1327980	1.9488	23.4519	3.58905	0.000129814	0	0	0	0	0
WBGene00003992	ZK381.4	chrIV:6974430-6977307	0.243907	23.5446	6.59292	2.21616e-08	Z2/Z3 enirhced	oogenesis-enriched	strictly maternal	yes	yes
WBGene00003993	B0523.3	chrIII:8670467-8674970	0.427944	11.4968	4.74767	7.81808e-06	0	0	0	yes	0
WBGene00003994	C18G1.4	chrV:4755970-4758569	0.0245685	5.09562	7.69631	0.000808202	Z2/Z3 enirhced	intrinsic	strictly maternal	yes	yes
WBGene00004027	Y49E10.14	chrIII:12426760-12429060	0.386487	19.8916	5.6856	8.95399e-07	Z2/Z3 enirhced	oogenesis-enriched	strictly maternal	yes	yes
WBGene00004029	K09B11.1	chrIV:13416767-13421501	1.27922	5.97832	2.22448	0.0115111	0	0	0	0	0
WBGene00004032	F57F5.5	chrV:12014371-12024141	2.28618	7.6282	1.7384	0.03305	0	0	0	0	0
WBGene00004040	C04G6.3	chrII:5083844-5091628	4.82251	17.3427	1.84647	0.013804	0	0	0	0	0
WBGene00004043	Y71F9B.7	chrI:2755625-2758206	1.41067	13.8321	3.29357	6.46757e-05	0	0	0	yes	0
WBGene00004044	F55G1.8	chrIV:7470848-7473329	0.533149	5.89099	3.4659	0.000161467	Z2/Z3 enirhced	oogenesis-enriched	strictly maternal	yes	yes
WBGene00004078	F52E1.1	chrV:8414064-8415235	0.975205	83.9369	6.42746	2.62546e-11	Z2/Z3 enirhced	oogenesis-enriched	strictly maternal	yes	yes
WBGene00004086	Y49E10.3	chrIII:12374136-12377149	6.66408	33.0964	2.3122	0.00814617	Z2/Z3 enirhced	oogenesis-enriched	na	yes	0
WBGene00004094	Y110A7A.18	chrI:5158518-5162207	0.825068	42.3277	5.68094	7.62416e-12	Z2/Z3 enirhced	intrinsic	na	yes	0
WBGene00004109	C34G6.7	chrI:5898305-5904692	7.16111	33.2686	2.21591	0.00603692	0	0	0	0	0
WBGene00004163	Y39A3CR.7	chrIII:1849053-1852879	0.216571	3.35249	3.95232	0.00298599	0	0	0	0	0
WBGene00004175	ZK1236.6	chrIII:8438011-8439337	4.57176	23.8552	2.38348	0.00440858	0	0	0	0	0
WBGene00004178	D2030.6	chrI:7585324-7588357	2.23317	44.2864	4.3097	1.88146e-08	Z2/Z3 enirhced	intrinsic	na	0	0
WBGene00004179	C01G5.2	chrIV:6526717-6529791	0.142026	13.2426	6.54289	7.81693e-10	Z2/Z3 enirhced	intrinsic	strictly maternal	0	0
WBGene00004201	F54F2.8	chrIII:8807399-8809248	3.0246	15.9802	2.40147	0.00348655	0	0	0	0	0
WBGene00004205	F29B9.4	chrIV:4653374-4657579	1.75383	8.83034	2.33196	0.0367803	0	0	0	yes	0
WBGene00004206	M03F8.2	chrV:5943456-5950974	5.7183	23.4903	2.03841	0.0154262	0	0	0	0	0
WBGene00004208	ZK675.1	chrII:7893177-7900434	2.3893	10.3017	2.10823	0.00578096	0	0	0	0	0
WBGene00004209	F21H12.4	chrII:6083599-6085830	0.558233	2.51982	2.17438	0.0291923	0	0	0	yes	0
WBGene00004217	C32E8.8	chrI:3789321-3792800	1.12365	25.3086	4.49336	1.02335e-08	Z2/Z3 enirhced	oogenesis-enriched	strictly maternal	yes	0
WBGene00004239	Y45F10A.2	chrIV:13509200-13521848	0.532064	63.9607	6.90944	0.00763185	0	0	0	yes	yes
WBGene00004241	F54C9.8	chrII:8575489-8577671	0.237469	23.1504	6.60715	2.41534e-09	Z2/Z3 enirhced	intrinsic	strictly maternal	yes	yes
WBGene00004242	F18A11.1	chrII:13039342-13043406	1.07686	20.454	4.24748	2.95026e-07	0	0	0	yes	0
WBGene00004243	B0273.2	chrIV:5486675-5490322	1.62703	33.8981	4.3809	1.24571e-07	0	0	0	yes	0
WBGene00004244	C30G12.7	chrII:7296111-7298206	0.666763	74.5062	6.80404	6.01907e-13	Z2/Z3 enirhced	oogenesis-enriched	strictly maternal	yes	0
WBGene00004258	D2023.2	chrV:11817763-11822510	4.1312	12.8344	1.63538	0.0356482	0	0	0	0	0
WBGene00004296	T04H1.4	chrV:12245574-12251227	5.25912	19.1432	1.86394	0.0167137	0	0	0	yes	0
WBGene00004298	W06D4.6	chrI:9065079-9075070	0.767677	10.8285	3.81819	0.0280394	Z2/Z3 enirhced	oogenesis-enriched	strictly maternal	yes	0
WBGene00004305	R05D11.3	chrI:8591205-8591970	4.99728	29.0536	2.5395	0.00350803	Z2/Z3 enirhced	mixed_oogenesis-somatic	strictly maternal	0	0
WBGene00004315	T23F6.4	chrIV:12724924-12730072	6.21542	19.7631	1.66888	0.0297127	0	0	0	yes	0
WBGene00004322	E03A3.2	chrIII:4052793-4057951	3.16179	18.8349	2.57459	0.00118474	0	0	0	yes	0
WBGene00004324	F21C3.4	chrI:7280549-7282869	0.556461	6.59049	3.56603	0.00119792	0	0	0	yes	0
WBGene00004333	W02A2.6	chrIV:13349123-13353169	0.202712	27.8129	7.10018	2.48366e-11	Z2/Z3 enirhced	intrinsic	strictly maternal	yes	yes
WBGene00004337	C54G10.2	chrV:14642724-14645908	5.20369	33.734	2.6966	0.000461378	0	0	0	yes	0
WBGene00004341	F11H8.1	chrIII:7021109-7023526	5.40271	18.5271	1.77788	0.0235664	0	0	0	0	0
WBGene00004353	F45B8.2	chrX:14962851-14963925	0.0587808	12.1729	7.69411	0.00105162	0	0	0	yes	0
WBGene00004358	F08F3.3	chrV:5428143-5430415	0	5.55452	1.79769e+308	0.023028	0	0	0	0	0
WBGene00004374	T11F8.3	chrIV:5469985-5473164	0.0041568	4.7684	10.1638	5.04783e-05	0	0	0	yes	0
WBGene00004380	C06A5.9	chrI:6009782-6011525	1.12414	25.3822	4.49692	5.31062e-07	0	0	0	yes	0
WBGene00004422	T22F3.4	chrV:3585323-3586063	4.40968	83.0136	4.2346	3.97869e-07	Z2/Z3 enirhced	intrinsic	na	yes	0
WBGene00004439	F52B5.6	chrI:8329053-8329642	31.9782	129.287	2.01542	0.00842077	0	0	0	yes	0
WBGene00004460	C30C11.2	chrIII:8447278-8449265	9.88758	35.4776	1.84322	0.0157455	0	0	0	yes	0
WBGene00004461	F10G7.8	chrII:4696415-4698424	5.73941	25.1097	2.12927	0.00530877	0	0	0	yes	0
WBGene00004463	F49C12.8	chrIV:9316621-9318087	12.4856	38.7549	1.63411	0.0397725	0	0	0	yes	0
WBGene00004465	T06D8.8	chrII:11237384-11239028	17.7021	67.8136	1.93765	0.0156124	0	0	0	yes	0
WBGene00004468	ZK20.5	chrII:11653034-11654123	5.26877	33.1613	2.65396	0.000665808	0	0	0	yes	0
WBGene00004503	F23F12.6	chrIII:6489739-6491229	7.74443	48.6923	2.65246	0.000695233	Z2/Z3 enirhced	intrinsic	strictly maternal	yes	0
WBGene00004681	F52G2.2	chrIV:13521944-13540241	6.31891	20.3939	1.69039	0.0455931	0	0	0	0	0
WBGene00004744	D2013.8	chrII:9333952-9338835	2.73658	10.3349	1.91708	0.049246	0	0	0	0	0
WBGene00004759	F45D3.5	chrV:12560712-12563369	9.02027	31.692	1.81287	0.017775	0	0	0	0	0
WBGene00004762	F35G12.3	chrIII:4566251-4578405	4.8861	23.3872	2.25896	0.015337	0	0	0	0	0
WBGene00004795	C04F5.1	chrV:5119954-5126898	1.78724	9.3097	2.381	0.00234383	Z2/Z3 enirhced	mixed_oogenesis-somatic	strictly maternal	0	0
WBGene00004798	F43D9.4	chrIII:10506012-10506703	0.659306	94.536	7.16377	9.68247e-10	Z2/Z3 enirhced	intrinsic	strictly maternal	yes	0
WBGene00004808	F46A9.4	chrI:9469681-9470625	0.709201	94.8784	7.06374	5.76905e-11	Z2/Z3 enirhced	intrinsic	strictly maternal	yes	0
WBGene00004824	F56B3.4	chrIV:786273-794275	0.98413	5.83979	2.56899	0.00714603	0	0	0	yes	0
WBGene00004885	Y73B6A.4	chrIV:6740485-6742432	0.490976	3.51819	2.84111	0.00598992	0	0	0	yes	0
WBGene00004886	Y39A3CR.1	chrIII:1878355-1880830	0.872141	5.70779	2.7103	0.0151112	Z2/Z3 enirhced		strictly maternal	0	0
WBGene00004905	M01G5.5	chrIII:1520215-1532760	2.43198	8.48815	1.80332	0.0215404	0	0	0	0	0
WBGene00004953	F32H2.3	chrI:8966977-8970121	9.93102	29.6916	1.58004	0.0492213	0	0	0	yes	0
WBGene00004960	Y66D12A.20	chrIII:11505453-11508812	0.197968	1.38367	2.80516	0.0452151	0	0	0	0	yes
WBGene00004976	K01A11.4	chrIII:3439000-3444199	0.144575	1.05711	2.87023	0.0158291	0	0	0	0	0
WBGene00004981	Y66H1B.4	chrIV:379899-383185	1.65844	5.80021	1.80628	0.0360503	0	0	0	0	0
WBGene00004984	ZC404.8	chrV:6783168-6784905	5.40623	105.695	4.28914	4.79006e-07	Z2/Z3 enirhced	oogenesis-enriched	na	yes	0
WBGene00005019	D2096.4	chrIV:8361073-8363324	3.21119	15.9709	2.31427	0.002231	0	0	0	yes	0
WBGene00005021	R10E11.4	chrIII:9776445-9780262	1.95019	14.719	2.91599	0.0472263	0	0	0	yes	0
WBGene00005024	Y50D4C.4	chrV:951605-964801	2.85624	14.2061	2.31433	0.00226252	0	0	0	0	0
WBGene00006311	F57B1.2	chrV:13191696-13193524	0.0384312	7.03953	7.51706	1.79385e-05	Z2/Z3 enirhced	oogenesis-enriched	strictly maternal	yes	yes
WBGene00006375	F26D2.2	chrV:16405742-16407679	2.73394	27.3592	3.32297	1.64111e-05	0	0	0	yes	0
WBGene00006376	C24G6.1	chrV:5536684-5537697	0.178985	2.21626	3.63021	0.017539	Z2/Z3 enirhced	oogenesis-enriched	strictly maternal	yes	yes
WBGene00006377	F39H2.4	chrI:8660813-8664137	2.00036	14.6957	2.87706	0.004718	Z2/Z3 enirhced	intrinsic	na	yes	0
WBGene00006390	ZK1320.12	chrII:9669264-9671418	2.87228	10.0589	1.8082	0.0411566	0	0	0	0	0
WBGene00006397	C14A4.10	chrII:10604970-10605553	23.8945	114.886	2.26545	0.00353845	0	0	0	0	0
WBGene00006402	F59E12.13	chrII:5657695-5659836	5.49756	34.8638	2.66487	0.000423269	0	0	0	yes	0
WBGene00006434	F09E5.15	chrII:5378050-5379615	14.6376	52.8146	1.85126	0.0183203	0	0	0	0	0
WBGene00006440	Y47G6A.28	chrI:3439109-3447706	3.76198	14.4114	1.93765	0.0167126	Z2/Z3 enirhced		na	0	yes
WBGene00006446	F28F8.6	chrV:15575483-15576981	2.33983	8.73846	1.90098	0.0260644	Z2/Z3 enirhced	intrinsic	strictly maternal	yes	0
WBGene00006448	C16C10.10	chrIII:4153574-4154560	1.30133	14.685	3.49629	0.000375036	0	0	0	0	0
WBGene00006463	T26A5.3	chrIII:6465114-6467156	0.201237	19.1128	6.5695	1.18046e-08	Z2/Z3 enirhced		strictly maternal	0	yes
WBGene00006478	H38K22.3	chrIII:4317674-4320299	7.18836	27.8579	1.95435	0.0107219	0	0	0	0	0
WBGene00006483	F42A9.1	chrIV:8631419-8643990	4.43045	18.9143	2.09395	0.0153804	0	0	0	0	0
WBGene00006499	F44A2.1	chrV:9323186-9333040	2.28859	16.4967	2.84964	0.040577	0	0	0	yes	0
WBGene00006512	F18E2.2	chrV:12761028-12763358	5.47319	17.1271	1.64582	0.0317407	0	0	0	0	0
WBGene00006516	C05D11.2	chrIII:6433185-6436437	3.56692	16.8271	2.23804	0.00411167	0	0	0	0	0
WBGene00006552	Y66A7A.8	chrIII:11633128-11638448	0.0278542	1.05176	5.23876	0.0182154	0	0	0	0	0
WBGene00006562	K01C8.3	chrII:8270556-8273533	0.115346	8.66342	6.23089	0.00151602	Z2/Z3 enirhced	oogenesis-enriched	strictly maternal	yes	0
WBGene00006596	Y56A3A.27	chrIII:11949808-11960084	0.670224	4.25136	2.66521	0.00247972	0	0	0	0	0
WBGene00006604	Y47D3A.6	chrIII:11171992-11195101	1.17439	52.4378	5.48062	3.12518e-05	Z2/Z3 enirhced		na	0	0
WBGene00006704	F58A4.10	chrIII:9630006-9631085	6.83386	24.1243	1.81971	0.0255536	0	0	0	yes	0
WBGene00006710	Y110A2AR.2	chrII:2906545-2913579	7.26108	53.2773	2.87526	0.000218511	0	0	0	0	0
WBGene00006713	R01H2.6	chrIII:7067650-7068510	47.3235	238.557	2.3337	0.00365726	0	0	0	yes	0
WBGene00006722	Y40G12A.2	chrV:6508813-6509867	6.30368	29.1368	2.20858	0.00643869	0	0	0	0	0
WBGene00006740	K02F2.4	chrI:6812700-6814049	0.114073	3.58254	4.97295	0.00767503	0	0	0	yes	yes
WBGene00006856	C13B4.2	chrII:14485552-14488615	4.34594	19.6686	2.17815	0.00575998	Z2/Z3 enirhced	intrinsic	strictly maternal	yes	0
WBGene00006916	C26H9A.1	chrIV:12640434-12650620	0.457243	2.95858	2.69387	0.00164823	0	0	0	0	0
WBGene00006933	F59G1.3	chrII:5907792-5911182	5.27394	31.0194	2.55622	0.000892015	0	0	0	0	0
WBGene00006944	F18C5.2	chrII:6554944-6559227	0.701076	8.37699	3.57879	9.80227e-06	0	0	0	yes	yes
WBGene00006963	K07G5.2	chrI:7159722-7160750	5.80779	21.1562	1.86502	0.0266181	0	0	0	yes	0
WBGene00006976	K02B12.8	chrI:8529377-8531314	0.0645388	7.90524	6.9365	3.91448e-05	Z2/Z3 enirhced	oogenesis-enriched	na	yes	0
WBGene00006977	F59B2.6	chrIII:9002711-9005878	0.406616	49.6346	6.93153	5.31062e-07	Z2/Z3 enirhced	oogenesis-enriched	strictly maternal	yes	0
WBGene00007001	C43E11.4	chrI:4247757-4249328	1.45167	6.42939	2.14697	0.0167341	0	0	0	yes	0
WBGene00007022	ZK970.3	chrII:10300728-10302799	2.7621	18.5189	2.74516	0.0125123	0	0	0	yes	0
WBGene00007054	B0379.4	chrI:10086522-10102001	2.04396	21.2874	3.38057	0.00363573	Z2/Z3 enirhced		na	0	0
WBGene00007087	B0001.2	chrIV:12146471-12150953	0.166075	18.6454	6.81085	2.57616e-11	0	0	0	yes	0
WBGene00007089	B0001.4	chrIV:12135444-12137325	7.35724	41.1018	2.48196	0.00164748	0	0	0	0	0
WBGene00007090	B0001.5	chrIV:12141139-12143309	4.5877	16.9525	1.88566	0.0121174	0	0	0	0	0
WBGene00007092	B0001.7	chrIV:12151169-12154220	0.176226	15.2197	6.43237	7.15491e-10	Z2/Z3 enirhced	oogenesis-enriched	na	yes	0
WBGene00007093	B0001.8	chrIV:12138837-12141036	3.51851	11.1499	1.664	0.0364281	0	0	0	0	0
WBGene00007102	B0024.13	chrV:10320692-10322190	0.737675	7.3241	3.3116	0.00516548	0	0	0	yes	yes
WBGene00007108	B0035.5	chrIV:11317394-11319926	0.76996	3.3124	2.10502	0.0266993	0	0	0	0	0
WBGene00007109	B0035.6	chrIV:11320777-11323607	0.231474	16.3962	6.14637	5.32662e-10	Z2/Z3 enirhced	oogenesis-enriched	strictly maternal	yes	0
WBGene00007111	B0035.12	chrIV:11329443-11332922	3.00878	9.91276	1.72011	0.0253287	0	0	0	yes	0
WBGene00007113	B0035.15	chrIV:11296968-11298228	3.8979	13.4345	1.78517	0.0314237	0	0	0	yes	0
WBGene00007114	B0035.16	chrIV:11295125-11296865	0.105487	1.06098	3.33027	0.0456686	0	0	0	0	yes
WBGene00007118	B0240.4	chrV:11731102-11733454	11.6396	46.3215	1.99264	0.0136444	0	0	0	0	0
WBGene00007125	B0250.8	chrV:20469671-20470454	0.0717768	2.28436	4.99213	0.0179566	0	0	0	0	0
WBGene00007150	B0365.1	chrV:13116487-13120120	1.12282	4.58702	2.03043	0.0113287	0	0	0	yes	0
WBGene00007165	B0391.10	chrV:15585677-15592966	0.204312	14.7775	6.17648	5.31062e-07	Z2/Z3 enirhced	intrinsic	na	yes	0
WBGene00007167	B0393.2	chrIII:4754396-4756978	3.09605	17.1935	2.47337	0.000958233	0	0	0	yes	0
WBGene00007171	B0393.6	chrIII:4780403-4781946	0.29299	18.7182	5.99745	5.27548e-07	Z2/Z3 enirhced	oogenesis-enriched	strictly maternal	yes	yes
WBGene00007187	B0464.8	chrIII:9468072-9469750	2.22894	9.95488	2.15905	0.0176142	0	0	0	yes	0
WBGene00007193	B0491.6	chrII:11345885-11347893	2.51925	9.6246	1.93373	0.023156	0	0	0	0	0
WBGene00007195	B0513.2	chrIV:13882708-13884124	12.9952	57.5376	2.14652	0.00509464	Z2/Z3 enirhced	intrinsic	na	yes	0
WBGene00007204	B0564.4	chrIV:13111028-13113058	0.0574017	0.741985	3.69222	0.029872	0	0	0	0	0
WBGene00007207	B0564.7	chrIV:13100690-13104616	2.47073	11.9958	2.27952	0.00363756	0	0	0	yes	0
WBGene00007255	C01H6.6	chrI:7222463-7224133	0.118687	1.73656	3.871	0.00868056	0	0	0	0	0
WBGene00007267	C03A3.2	chrX:11262780-11266247	3.21	27.1721	3.08148	0.000207957	0	0	0	0	0
WBGene00007277	C03D6.5	chrI:9658264-9660064	0.677322	5.40107	2.99533	0.00581068	Z2/Z3 enirhced	intrinsic	strictly maternal	yes	0
WBGene00007297	C04F12.1	chrI:9673658-9678544	0.270543	15.4491	5.83553	7.65979e-09	0	0	0	0	0
WBGene00007299	C04F12.5	chrI:9690120-9690548	0.606009	6.93224	3.51591	0.0251688	0	0	0	yes	0
WBGene00007303	C04F12.9	chrI:9710150-9710758	0.398107	5.26453	3.72508	0.0235798	0	0	0	0	yes
WBGene00007330	C05C10.3	chrII:9931785-9936836	0.15074	2.55874	4.0853	0.00601852	0	0	0	0	0
WBGene00007332	C05C10.5	chrII:9939094-9940278	0.799918	22.7467	4.82966	0.00396103	Z2/Z3 enirhced	oogenesis-enriched	strictly maternal	yes	yes
WBGene00007334	C05C10.7	chrII:9938052-9938903	0.0239139	8.08552	8.40135	0.00543075	Z2/Z3 enirhced		na	0	yes
WBGene00007403	C07A9.7	chrIII:9690977-9694488	4.43965	14.4464	1.70219	0.0479488	0	0	0	yes	0
WBGene00007445	C08F8.3	chrIV:11155007-11156613	0.412102	17.5812	5.41489	9.23836e-08	Z2/Z3 enirhced	oogenesis-enriched	strictly maternal	yes	0
WBGene00007489	C09G5.7	chrII:10714853-10716278	0	1.41943	1.79769e+308	0.0323576	Z2/Z3 enirhced	spermatogenesis	strictly maternal	0	0
WBGene00007492	C09G9.1	chrIV:8862597-8865472	7.09527	23.066	1.70084	0.0309141	0	0	0	0	0
WBGene00007504	C09H10.10	chrII:11095873-11096417	1.19323	13.5956	3.51019	0.00356321	Z2/Z3 enirhced		na	0	0
WBGene00007545	C13B4.1	chrII:14470299-14479551	1.17095	10.9083	3.21968	3.71147e-05	0	0	0	0	0
WBGene00007577	C14B1.6	chrIII:3713444-3719655	5.12203	20.6426	2.01084	0.014077	0	0	0	0	0
WBGene00007580	C14B1.9	chrIII:3724202-3726482	0.242332	5.49937	4.50421	4.43309e-05	Z2/Z3 enirhced	oogenesis-enriched	na	yes	0
WBGene00007586	C14C10.3	chrV:12596372-12599135	6.78121	35.2292	2.37716	0.00495699	0	0	0	0	0
WBGene00007622	C16C10.1	chrIII:4179035-4181414	1.22999	10.0275	3.02725	0.0012534	0	0	0	yes	0
WBGene00007623	C16C10.2	chrIII:4176675-4178640	1.83436	7.82053	2.09199	0.0342797	0	0	0	yes	0
WBGene00007624	C16C10.3	chrIII:4172308-4176133	0.546039	38.2931	6.13194	8.02543e-13	Z2/Z3 enirhced	oogenesis-enriched	strictly maternal	yes	0
WBGene00007643	C17E4.3	chrI:9416892-9418866	0.98523	14.1407	3.84325	1.5207e-05	Z2/Z3 enirhced	oogenesis-enriched	strictly maternal	yes	0
WBGene00007681	C18D11.3	chrIII:11823347-11824340	24.7009	116.679	2.23991	0.00714603	0	0	0	0	0
WBGene00007698	C24F3.4	chrIV:10214963-10219286	1.71876	5.45658	1.66663	0.0498708	0	0	0	0	0
WBGene00007707	C25A1.5	chrI:10177170-10178911	3.57488	28.3139	2.98554	0.000157987	Z2/Z3 enirhced	mixed_oogenesis-somatic	na	0	0
WBGene00007709	C25A1.8	chrI:10184467-10185458	2.12651	74.3823	5.1284	2.21616e-08	Z2/Z3 enirhced		strictly maternal	0	0
WBGene00007718	C25D7.8	chrV:15066280-15067447	3.63216	27.4056	2.91557	0.000401196	0	0	0	yes	0
WBGene00007757	C27A7.6	chrV:12125132-12127318	0.00764997	9.83309	10.328	0.000580742	Z2/Z3 enirhced		strictly maternal	0	yes
WBGene00007762	C27B7.5	chrIV:8901631-8903159	1.57231	6.2082	1.98129	0.0316533	Z2/Z3 enirhced	oogenesis-enriched	strictly maternal	yes	0
WBGene00007773	C27C12.3	chrX:14863608-14865775	0.0707117	2.27799	5.00967	0.000651657	0	0	0	0	yes
WBGene00007780	C27D8.4	chrIV:12704102-12712291	1.24928	14.7387	3.56045	0.000605986	Z2/Z3 enirhced	mixed_oogenesis-somatic	strictly maternal	0	0
WBGene00007785	C27H6.3	chrV:9981260-9982740	0.896159	9.06085	3.33782	0.000315487	Z2/Z3 enirhced	intrinsic	strictly maternal	yes	yes
WBGene00007788	C28A5.1	chrIII:4429589-4434316	0.287991	15.0258	5.70528	9.24219e-11	Z2/Z3 enirhced	oogenesis-enriched	strictly maternal	yes	0
WBGene00007789	C28A5.2	chrIII:4434721-4439515	0.249368	12.0557	5.5953	3.68148e-10	0	0	0	yes	0
WBGene00007797	C29A12.1	chrV:10812387-10813374	1.08115	16.0094	3.88828	0.00013411	Z2/Z3 enirhced	intrinsic	strictly maternal	yes	yes
WBGene00007824	C30H6.7	chrIV:17380595-17382189	8.01074	57.349	2.83976	0.000183146	0	0	0	0	0
WBGene00007860	C32A3.3	chrIII:3636027-3643648	3.01511	26.4666	3.13389	0.000559548	0	0	0	0	0
WBGene00007912	C34B7.2	chrI:8336974-8346016	1.65688	5.57037	1.7493	0.0291513	0	0	0	0	0
WBGene00007917	C34C6.4	chrII:8696545-8698878	1.58562	8.79865	2.47224	0.00241405	0	0	0	0	0
WBGene00007921	C34C12.2	chrIII:3456464-3460068	4.09986	13.0109	1.66608	0.0354158	0	0	0	yes	0
WBGene00007927	C34C12.8	chrIII:3460393-3461578	6.13549	23.371	1.92947	0.017547	Z2/Z3 enirhced		strictly maternal	0	0
WBGene00007965	C36A4.4	chrIII:3841243-3843598	1.53507	5.29978	1.78763	0.0434374	0	0	0	yes	0
WBGene00007966	C36A4.5	chrIII:3844256-3848244	1.00413	11.9295	3.57052	9.95961e-06	Z2/Z3 enirhced	oogenesis-enriched	na	yes	0
WBGene00007969	C36A4.9	chrIII:3864017-3866812	4.31243	24.1763	2.48702	0.00316904	Z2/Z3 enirhced		strictly maternal	0	0
WBGene00007978	C36B1.11	chrI:8755906-8757564	1.98998	80.6019	5.33999	3.68148e-10	0	0	0	yes	yes
WBGene00007979	C36B1.12	chrI:8752229-8755672	6.50817	29.3529	2.17318	0.0155815	0	0	0	yes	0
WBGene00007985	C36F7.2	chrI:9544739-9558088	0.363047	7.44931	4.35888	0.000174911	Z2/Z3 enirhced		strictly maternal	0	yes
WBGene00008000	C38C10.2	chrIII:9385578-9390025	9.74782	35.725	1.87378	0.0166876	0	0	0	0	0
WBGene00008005	C38D4.4	chrIII:4793050-4795363	0.0466325	4.93403	6.72529	8.91622e-06	Z2/Z3 enirhced	oogenesis-enriched	strictly maternal	yes	yes
WBGene00008010	C38D9.2	chrV:17566412-17571577	0.164296	1.20745	2.8776	0.0276435	Z2/Z3 enirhced	mixed_oogenesis-somatic	strictly maternal	0	0
WBGene00008034	C39E9.11	chrIV:13091163-13093820	7.73597	37.2302	2.26682	0.00478556	0	0	0	yes	0
WBGene00008061	C41G7.3	chrI:9517073-9518726	0.139844	13.3952	6.58175	7.50383e-07	Z2/Z3 enirhced	oogenesis-enriched	na	yes	0
WBGene00008062	C41G7.4	chrI:9519249-9521182	0.00883794	17.966	10.9893	0.000174078	Z2/Z3 enirhced	intrinsic	strictly maternal	yes	0
WBGene00008079	C44B9.2	chrIII:10875359-10877915	0.184768	1.90288	3.3644	0.028442	0	0	0	0	0
WBGene00008081	C44B9.4	chrIII:10882270-10893565	3.94637	19.3406	2.29304	0.00262249	0	0	0	yes	0
WBGene00008111	C46C2.3	chrIV:9225698-9227765	0.128749	1.75745	3.77086	0.0241769	0	0	0	0	0
WBGene00008118	C46F11.3	chrIII:3644356-3650814	1.15757	19.4137	4.0679	1.52561e-05	0	0	0	yes	0
WBGene00008140	C47D12.8	chrII:11696106-11705288	1.85152	10.5358	2.50852	0.0193251	0	0	0	yes	0
WBGene00008145	C47E8.8	chrV:14697003-14707577	0.2163	14.967	6.11261	1.37579e-11	0	0	0	yes	0
WBGene00008147	C47E12.2	chrIV:10001949-10003513	3.81389	11.9008	1.64172	0.0460031	0	0	0	yes	0
WBGene00008164	C47G2.3	chrII:11288634-11290097	3.47587	14.8166	2.09177	0.0195352	0	0	0	0	0
WBGene00008169	C48B4.6	chrIII:9557368-9558467	0.157291	91.794	9.18882	6.51291e-08	Z2/Z3 enirhced	oogenesis-enriched	strictly maternal	yes	0
WBGene00008170	C48B4.7	chrIII:9558650-9559342	0.044815	25.4825	9.15131	0.000920346	Z2/Z3 enirhced	oogenesis-enriched	strictly maternal	yes	0
WBGene00008171	C48B4.8	chrIII:9559819-9561151	0	2.89447	1.79769e+308	0.0368955	Z2/Z3 enirhced		strictly maternal	0	0
WBGene00008172	C48B4.9	chrIII:9562451-9563236	0.0668217	27.7262	8.69671	0.000107739	Z2/Z3 enirhced	oogenesis-enriched	strictly maternal	yes	0
WBGene00008173	C48B4.10	chrIII:9563504-9564416	0.015281	25.6011	10.7103	0.00362603	Z2/Z3 enirhced	intrinsic	strictly maternal	yes	0
WBGene00008174	C48B4.11	chrIII:9564642-9565959	0.0568068	20.6547	8.50619	9.37728e-07	Z2/Z3 enirhced	oogenesis-enriched	strictly maternal	yes	0
WBGene00008196	C49C3.6	chrIV:17331489-17332403	4.70932	32.5217	2.78781	0.000608647	0	0	0	yes	0
WBGene00008197	C49C3.7	chrIV:17332535-17333526	3.50343	33.0418	3.23745	0.000102196	0	0	0	yes	0
WBGene00008236	C50F4.12	chrV:9538061-9539711	0.791236	3.31052	2.06488	0.0438172	0	0	0	yes	0
WBGene00008237	C50F4.14	chrV:9547608-9549812	3.24537	14.0305	2.11212	0.0102099	0	0	0	0	0
WBGene00008238	C50F4.16	chrV:9539817-9541583	2.28637	24.6478	3.43032	2.3312e-05	Z2/Z3 enirhced		na	0	0
WBGene00008262	C53A5.1	chrV:14523314-14524115	37.4466	161.415	2.10787	0.00465171	0	0	0	0	0
WBGene00008274	C53B4.4	chrIV:8973682-8984691	6.58268	29.4115	2.15963	0.0306528	0	0	0	0	0
WBGene00008318	C54G4.9	chrI:8024909-8026520	0.991383	5.88113	2.56858	0.00515066	0	0	0	yes	0
WBGene00008330	C55A6.1	chrV:11503806-11504723	6.70348	21.5304	1.68339	0.0447999	Z2/Z3 enirhced		na	0	0
WBGene00008361	D1043.1	chrII:11582781-11591435	1.81742	12.2349	2.75105	0.00045122	0	0	0	yes	0
WBGene00008371	D1054.3	chrV:10771430-10772811	11.0501	36.0561	1.70619	0.0413932	0	0	0	yes	0
WBGene00008384	D1081.6	chrI:8482788-8485688	0.941263	14.2272	3.91791	0.004718	0	0	0	yes	0
WBGene00008385	D1081.7	chrI:8487613-8490930	2.66224	35.9077	3.75358	1.8218e-05	Z2/Z3 enirhced	oogenesis-enriched	strictly maternal	yes	0
WBGene00008387	D1081.9	chrI:8485869-8487037	3.76636	70.9237	4.23502	4.94049e-07	0	0	0	0	yes
WBGene00008399	D2005.4	chrI:7813755-7819135	0.127646	21.0021	7.36224	2.64198e-08	Z2/Z3 enirhced	intrinsic	strictly maternal	yes	0
WBGene00008400	D2005.5	chrI:7820837-7826374	1.2606	11.6613	3.20955	2.11358e-05	0	0	0	yes	0
WBGene00008405	D2013.9	chrII:9338898-9341327	3.23473	9.58886	1.56771	0.0430611	0	0	0	0	0
WBGene00008408	D2023.4	chrV:11825010-11825745	1.41962	8.75345	2.62435	0.020027	0	0	0	0	0
WBGene00008410	D2023.6	chrV:11827305-11829338	1.1816	6.22786	2.39799	0.00479136	0	0	0	yes	0
WBGene00008417	D2030.7	chrI:7588648-7590563	0.740531	47.2076	5.99431	4.38389e-11	Z2/Z3 enirhced	oogenesis-enriched	strictly maternal	yes	0
WBGene00008418	D2030.8	chrI:7591294-7595194	2.30771	10.9796	2.25029	0.00397225	0	0	0	yes	0
WBGene00008440	DY3.8	chrI:8758149-8758990	3.72504	23.5412	2.65986	0.00181313	0	0	0	0	0
WBGene00008480	E04D5.1	chrII:10416725-10422269	3.51665	13.373	1.92705	0.0172117	0	0	0	yes	0
WBGene00008502	F01G4.3	chrIV:11135568-11142320	1.83702	7.3442	1.99924	0.00769838	0	0	0	0	0
WBGene00008503	F01G4.4	chrIV:11143323-11145902	5.03902	63.8851	3.66427	8.54806e-07	Z2/Z3 enirhced		na	0	0
WBGene00008531	F02E9.7	chrI:8413253-8416123	4.83333	15.0752	1.64109	0.0356482	0	0	0	yes	0
WBGene00008555	F07C6.4	chrIV:12817036-12830075	1.55916	5.5614	1.83468	0.027558	0	0	0	yes	0
WBGene00008561	F07H5.10	chrII:8807134-8808526	0.388922	5.79782	3.89796	0.0012534	Z2/Z3 enirhced	intrinsic	strictly maternal	yes	0
WBGene00008569	F08A8.7	chrI:12958693-12959921	1.15624	15.9752	3.78832	9.40429e-05	Z2/Z3 enirhced		na	0	0
WBGene00008580	F08G5.1	chrIV:12408870-12410444	0.498487	12.7106	4.67233	4.7231e-06	Z2/Z3 enirhced	intrinsic	strictly maternal	yes	yes
WBGene00008639	F10B5.2	chrII:8144748-8149978	1.34561	6.94647	2.36802	0.0116574	Z2/Z3 enirhced	intrinsic	na	yes	0
WBGene00008642	F10B5.8	chrII:8137827-8143345	1.2785	16.9759	3.73096	0.0346793	0	0	0	0	0
WBGene00008685	F11A10.4	chrIV:12096756-12105739	4.13623	12.3553	1.57874	0.0421814	0	0	0	0	0
WBGene00008686	F11A10.5	chrIV:12094349-12096663	5.93779	31.5337	2.40889	0.00211817	0	0	0	yes	0
WBGene00008733	F13B12.6	chrIV:10414807-10417861	9.45623	33.0403	1.80489	0.0236012	0	0	0	0	0
WBGene00008740	F13D12.5	chrII:11726753-11728368	0.126708	27.8814	7.78165	5.90287e-09	Z2/Z3 enirhced	intrinsic	strictly maternal	yes	0
WBGene00008848	F15B9.4	chrV:13002326-13008910	2.6428	13.4496	2.34742	0.00396207	0	0	0	yes	0
WBGene00008856	F15D3.6	chrI:11572111-11577479	5.88865	22.6902	1.94606	0.0151112	0	0	0	0	0
WBGene00008859	F15D4.2	chrII:13216019-13216685	2.51852	10.8308	2.1045	0.0401041	0	0	0	0	0
WBGene00008863	F15D4.6	chrII:13249137-13249784	1.13384	15.2532	3.74982	0.00185656	0	0	0	0	0
WBGene00008877	F16A11.2	chrI:9390826-9393087	3.5979	16.5955	2.20556	0.00551775	0	0	0	yes	0
WBGene00008920	F17C11.9	chrV:10965699-10967912	25.768	181.515	2.81644	0.00128154	0	0	0	0	0
WBGene00008959	F19H6.4	chrX:12365619-12367047	0.0420072	7.98838	7.57112	0.000925839	Z2/Z3 enirhced	oogenesis-enriched	strictly maternal	yes	yes
WBGene00008975	F20D1.3	chrX:14976046-14978642	10.4608	45.9751	2.13586	0.00607019	0	0	0	0	0
WBGene00008995	F21A3.5	chrV:15538238-15542896	0.0761208	5.00708	6.03954	4.43827e-05	Z2/Z3 enirhced		na	0	yes
WBGene00009006	F21D5.1	chrIV:8725707-8728044	1.30185	10.2775	2.98085	0.000356224	0	0	0	yes	0
WBGene00009035	F22B3.4	chrIV:11410462-11412979	0.120945	3.38524	4.80684	6.85262e-05	0	0	0	yes	yes
WBGene00009052	F22D6.6	chrI:7095486-7098405	1.74871	8.19136	2.22781	0.00472796	0	0	0	yes	0
WBGene00009054	F22D6.9	chrI:7099829-7101760	0.958519	7.52222	2.97228	0.00111221	0	0	0	0	0
WBGene00009069	F23A7.4	chrX:16212533-16213000	1.36745	11.1932	3.03306	0.0129123	0	0	0	0	0
WBGene00009078	F23B2.13	chrIV:9146459-9146854	49.5069	240.051	2.27764	0.0203786	0	0	0	yes	0
WBGene00009082	F23B12.5	chrV:14441088-14447275	6.5037	83.9966	3.691	3.10733e-05	0	0	0	0	0
WBGene00009112	F25D7.2	chrI:10401057-10402931	6.38864	26.217	2.03692	0.00976173	0	0	0	0	0
WBGene00009113	F25D7.4	chrI:10418225-10422468	0.696289	15.4656	4.47323	5.79971e-07	0	0	0	yes	0
WBGene00009124	F25H2.13	chrI:10572017-10577113	1.13459	13.5929	3.58261	4.4993e-06	0	0	0	yes	0
WBGene00009159	F26E4.4	chrI:9768935-9772556	5.8796	24.1388	2.03757	0.0103775	0	0	0	yes	0
WBGene00009164	F26E4.11	chrI:9793747-9796666	5.93426	23.4623	1.9832	0.0120228	0	0	0	0	0
WBGene00009172	F26F2.7	chrV:20580964-20590290	2.60109	7.65929	1.5581	0.0479372	0	0	0	0	0
WBGene00009173	F26H9.1	chrI:9287438-9289757	0.265384	18.5494	6.12715	2.02482e-09	Z2/Z3 enirhced	intrinsic	strictly maternal	yes	0
WBGene00009203	F28C6.2	chrII:8594297-8596055	0.0501382	3.36605	6.069	0.000548541	0	0	0	yes	yes
WBGene00009222	F28F8.4	chrV:15571469-15572650	0.197159	11.1197	5.81762	8.31627e-05	Z2/Z3 enirhced		na	0	0
WBGene00009225	F28F8.8	chrV:15572914-15574087	0.0236462	1.75123	6.21061	0.0107991	0	0	0	0	yes
WBGene00009245	F29C12.3	chrII:13095938-13116731	2.23343	7.49942	1.74752	0.0259119	0	0	0	0	0
WBGene00009246	F29C12.4	chrII:13117412-13122015	7.4843	37.5929	2.32852	0.00244977	0	0	0	0	0
WBGene00009247	F29C12.5	chrII:13122967-13124719	0.0237864	9.22664	8.59953	0.00039338	0	0	0	0	0
WBGene00009262	F30A10.3	chrI:9492621-9494581	2.02015	8.15609	2.01342	0.0156587	0	0	0	yes	0
WBGene00009270	F30F8.1	chrI:7832708-7835399	0.0325057	11.4895	8.46541	8.77676e-07	Z2/Z3 enirhced	oogenesis-enriched	strictly maternal	yes	0
WBGene00009272	F30F8.3	chrI:7835808-7836940	3.09892	37.5875	3.60042	1.6124e-05	0	0	0	yes	0
WBGene00009300	F31F6.1	chrX:14867031-14868231	0.0862582	1.25651	3.86462	0.038666	0	0	0	yes	0
WBGene00009305	F32A7.4	chrI:14839893-14843092	0.923612	13.6316	3.88352	1.05055e-05	0	0	0	yes	0
WBGene00009307	F32A11.1	chrII:13157264-13160334	11.626	57.9341	2.31706	0.00281816	0	0	0	0	0
WBGene00009319	F32B6.2	chrIV:9884544-9887120	4.17236	38.8772	3.21999	2.3312e-05	0	0	0	0	0
WBGene00009353	F33A8.5	chrII:11049063-11049857	13.4561	70.3203	2.38568	0.00160487	0	0	0	0	0
WBGene00009374	F34D10.4	chrIII:3736581-3739734	1.97495	29.7443	3.91272	3.86116e-07	0	0	0	0	0
WBGene00009385	F35B12.5	chrV:11610689-11613036	6.71014	21.1074	1.65334	0.0344228	0	0	0	0	0
WBGene00009404	F35C11.5	chrII:8253216-8255218	0.0699142	6.76711	6.59681	4.90345e-05	Z2/Z3 enirhced	oogenesis-enriched	strictly maternal	yes	yes
WBGene00009435	F35G2.1	chrIV:12200955-12207958	3.26183	26.7541	3.03601	0.00104191	0	0	0	0	0
WBGene00009436	F35G2.2	chrIV:12208169-12208990	2.33635	11.234	2.26554	0.0156587	Z2/Z3 enirhced		strictly maternal	0	0
WBGene00009442	F35G12.5	chrIII:4584899-4586442	0.309838	4.1854	3.75578	0.00554431	0	0	0	yes	0
WBGene00009563	F39H2.3	chrI:8664946-8666491	2.24862	14.5825	2.69712	0.00129371	Z2/Z3 enirhced	oogenesis-enriched	strictly maternal	yes	0
WBGene00009575	F40F8.1	chrII:11127586-11129198	2.14366	9.14703	2.09323	0.0182346	0	0	0	yes	0
WBGene00009594	F40F12.5	chrIII:9898513-9910569	2.9572	21.0005	2.82812	0.000222659	0	0	0	0	0
WBGene00009627	F42A8.3	chrII:9352940-9354204	2.97694	14.6575	2.29973	0.0083054	0	0	0	yes	yes
WBGene00009672	F43G9.12	chrI:8640520-8644393	4.23669	13.6553	1.68845	0.0280624	0	0	0	yes	0
WBGene00009701	F44F4.2	chrII:10882347-10884402	0.26745	29.1843	6.76978	1.44871e-10	Z2/Z3 enirhced	oogenesis-enriched	strictly maternal	yes	0
WBGene00009702	F44F4.3	chrII:10884668-10885818	0.0086917	2.37605	8.09471	0.0350481	0	0	0	0	0
WBGene00009731	F45G2.3	chrIII:13423581-13426089	0.768517	16.4359	4.41863	1.69156e-07	0	0	0	yes	0
WBGene00009736	F45G2.10	chrIII:13436952-13439485	5.24915	21.119	2.00839	0.0193833	0	0	0	0	0
WBGene00009770	F46B6.5	chrV:9779526-9783038	5.87269	41.0673	2.8059	0.000804071	0	0	0	yes	0
WBGene00009776	F46B6.12	chrV:9774888-9775810	0.955754	16.2315	4.08601	0.000174911	Z2/Z3 enirhced		na	0	0
WBGene00009921	F52B5.2	chrI:8315894-8318243	1.39618	10.0769	2.8515	0.0012534	Z2/Z3 enirhced	intrinsic	na	yes	0
WBGene00009925	F52B11.2	chrIV:14083778-14084516	3.24051	20.2585	2.64423	0.0025122	0	0	0	0	0
WBGene00009937	F52F12.4	chrI:9901269-9902871	0.286451	47.3277	7.36825	2.78757e-10	Z2/Z3 enirhced	oogenesis-enriched	strictly maternal	yes	0
WBGene00010000	F53F8.3	chrV:20688773-20689498	0.391385	6.81323	4.12168	0.00603582	0	0	0	yes	yes
WBGene00010042	F54C9.6	chrII:8571033-8572827	2.62706	27.121	3.36789	0.000296698	Z2/Z3 enirhced	oogenesis-enriched	strictly maternal	yes	0
WBGene00010048	F54D5.2	chrII:11573145-11574853	0.0457021	26.7022	9.19048	4.846e-07	Z2/Z3 enirhced	intrinsic	strictly maternal	yes	0
WBGene00010056	F54D5.14	chrII:11578649-11582692	10.0611	49.2677	2.29185	0.00719386	0	0	0	yes	0
WBGene00010080	F55A11.7	chrV:11784569-11787424	0.27173	66.2696	7.93003	1.80377e-10	Z2/Z3 enirhced	intrinsic	strictly maternal	yes	0
WBGene00010081	F55A11.8	chrV:11788136-11789095	0.0103762	21.7097	11.0308	0.00164775	Z2/Z3 enirhced	oogenesis-enriched	strictly maternal	yes	0
WBGene00010094	F55C5.5	chrV:12270268-12271530	2.87555	10.8597	1.91707	0.0236012	Z2/Z3 enirhced	mixed_oogenesis-somatic	na	0	0
WBGene00010113	F55D12.5	chrI:7906820-7918336	1.95439	15.8426	3.01902	0.00292857	0	0	0	0	0
WBGene00010193	F57C2.1	chrII:14522387-14523431	0.0753531	8.65326	6.84343	0.000143464	Z2/Z3 enirhced	oogenesis-enriched	na	yes	0
WBGene00010194	F57C2.2	chrII:14521006-14522046	0.0146692	12.3872	9.72185	0.00128674	Z2/Z3 enirhced		strictly maternal	0	0
WBGene00010195	F57C2.3	chrII:14524097-14524971	0.035323	8.1412	7.84849	0.000631244	Z2/Z3 enirhced	oogenesis-enriched	strictly maternal	yes	0
WBGene00010197	F57C2.5	chrII:14526137-14528221	4.37668	26.2457	2.58418	0.000710362	0	0	0	0	0
WBGene00010227	F58A4.2	chrIII:9598390-9600661	0.834503	11.2705	3.75549	0.00406593	Z2/Z3 enirhced	intrinsic	strictly maternal	yes	0
WBGene00010231	F58B3.4	chrIV:11628733-11631818	1.93821	8.01583	2.04812	0.0126569	0	0	0	yes	0
WBGene00010259	F58E10.1	chrV:13987151-14006064	2.65352	24.6919	3.21806	4.74117e-05	0	0	0	0	0
WBGene00010263	F58G1.1	chrII:12919507-12923308	0.597754	12.5873	4.39627	1.46861e-07	Z2/Z3 enirhced	oogenesis-enriched	strictly maternal	yes	yes
WBGene00010264	F58G1.2	chrII:12915372-12918708	4.31072	16.2817	1.91725	0.0167275	0	0	0	0	0
WBGene00010281	F58G11.3	chrV:13669357-13671936	0.52235	4.01535	2.94244	0.0257429	Z2/Z3 enirhced	intrinsic	strictly maternal	yes	0
WBGene00010283	F58G11.6	chrV:13678863-13681531	5.041	15.95	1.66177	0.0398422	0	0	0	yes	0
WBGene00010293	F59A1.7	chrV:17656924-17658137	0.0843963	9.09159	6.75121	7.9047e-05	Z2/Z3 enirhced	intrinsic	na	yes	0
WBGene00010294	F59A1.8	chrV:17655554-17656628	0	2.69083	1.79769e+308	0.0385376	0	0	0	0	yes
WBGene00010295	F59A1.9	chrV:17653455-17655255	0	2.25563	1.79769e+308	0.0315149	0	0	0	yes	yes
WBGene00010308	F59B2.3	chrIII:8996821-8999708	2.69071	11.8909	2.1438	0.00970569	0	0	0	0	0
WBGene00010309	F59B2.5	chrIII:8999750-9002487	0.0747625	3.26882	5.45031	0.000250231	0	0	0	0	0
WBGene00010351	H02I12.1	chrIV:11372968-11377578	0.792804	49.6018	5.96728	1.49273e-11	Z2/Z3 enirhced	intrinsic	strictly maternal	yes	0
WBGene00010353	H02I12.5	chrIV:11401925-11403315	0.749097	7.31254	3.28715	0.000820374	Z2/Z3 enirhced	oogenesis-enriched	strictly maternal	yes	0
WBGene00010354	H02I12.8	chrIV:11403938-11405974	2.43378	10.9273	2.16666	0.00655851	0	0	0	yes	yes
WBGene00010367	H05L14.2	chrI:7980231-7993132	0.0166705	4.02385	7.91514	3.88218e-09	0	0	0	0	0
WBGene00010425	H37A05.1	chrV:13650292-13654117	3.86756	18.0632	2.22356	0.00370088	0	0	0	0	0
WBGene00010453	K01B6.1	chrIII:9285968-9296546	0.0793406	0.661951	3.06059	0.0382696	0	0	0	0	0
WBGene00010458	K01C8.6	chrII:8277570-8278465	9.51709	37.1355	1.96421	0.0137087	0	0	0	0	yes
WBGene00010492	K02B9.1	chrX:13926973-13929563	0.138258	27.3694	7.62906	1.04695e-10	Z2/Z3 enirhced	intrinsic	strictly maternal	yes	0
WBGene00010493	K02B9.2	chrX:13923003-13926051	0.36933	3.85167	3.3825	0.000625189	0	0	0	yes	yes
WBGene00010498	K02B12.5	chrI:8513894-8526615	0.934071	5.52168	2.5635	0.00110362	0	0	0	yes	0
WBGene00010502	K02C4.3	chrII:8078404-8087134	2.58618	8.34718	1.69047	0.027421	0	0	0	yes	0
WBGene00010546	K03H1.11	chrIII:9950823-9951875	7.62445	28.1833	1.88613	0.0154568	0	0	0	0	0
WBGene00010581	K05C4.4	chrI:14735224-14736934	0	1.49551	1.79769e+308	0.0286653	0	0	0	yes	0
WBGene00010608	K07A1.1	chrI:9582678-9583509	0.425671	57.3243	7.07327	2.59142e-09	Z2/Z3 enirhced		na	yes	0
WBGene00010609	K07A1.2	chrI:9585308-9588120	6.05702	28.1666	2.21731	0.005124	Z2/Z3 enirhced		strictly maternal	0	0
WBGene00010620	K07A12.1	chrI:8666588-8669777	0.82425	6.0371	2.8727	0.00108802	0	0	0	0	0
WBGene00010621	K07A12.2	chrI:8676662-8681313	0.502	9.82858	4.29122	6.26444e-07	0	0	0	yes	yes
WBGene00010637	K07F5.12	chrIV:9855997-9857966	0.0638259	1.347	4.39946	0.0247902	0	0	0	0	0
WBGene00010645	K07G5.6	chrI:7149935-7151869	1.77887	18.206	3.35538	6.46757e-05	0	0	0	0	0
WBGene00010663	K08E3.3	chrIII:13755840-13759326	0.100341	9.65211	6.58787	9.90019e-06	Z2/Z3 enirhced	intrinsic	strictly maternal	yes	yes
WBGene00010678	K08F4.3	chrIV:10129252-10130225	4.01257	17.2043	2.10017	0.0124549	Z2/Z3 enirhced		strictly maternal	0	0
WBGene00010690	K08H2.3	chrX:13237352-13238295	0.0938627	6.34128	6.07808	0.00121431	Z2/Z3 enirhced	intrinsic	strictly maternal	yes	yes
WBGene00010699	K08H10.9	chrV:9991827-9992768	4.79228	16.8626	1.81505	0.038277	0	0	0	0	0
WBGene00010709	K09B11.2	chrIV:13422475-13429322	2.95402	14.5966	2.30488	0.00224371	Z2/Z3 enirhced		na	0	yes
WBGene00010730	K10C3.2	chrI:9847397-9851784	9.90503	51.1564	2.36868	0.00612564	0	0	0	0	0
WBGene00010732	K10C3.5	chrI:9863589-9869041	2.13227	6.94899	1.70442	0.0470923	0	0	0	0	0
WBGene00010734	K10C8.1	chrV:12692523-12695237	0.173057	6.30566	5.18733	1.18171e-05	0	0	0	yes	0
WBGene00010770	K11D2.4	chrI:12523508-12527543	2.32836	16.3094	2.80832	0.00292194	0	0	0	0	0
WBGene00010780	K11H3.3	chrIII:9851766-9853735	4.107	17.0532	2.05389	0.0113866	0	0	0	0	0
WBGene00010781	K11H3.4	chrIII:9832847-9838224	0.197448	3.3065	4.06576	0.000199406	0	0	0	yes	0
WBGene00010783	K11H3.6	chrIII:9847536-9848023	10.3295	54.8	2.40741	0.0144525	0	0	0	0	0
WBGene00010787	K12D12.5	chrII:11860974-11863239	0.0231055	4.99866	7.75716	7.41427e-05	0	0	0	yes	yes
WBGene00010794	LLC1.3	chrIV:14464487-14469104	10.5672	87.1601	3.04408	8.36109e-05	0	0	0	0	0
WBGene00010810	M01F1.4	chrIII:3505639-3510020	0.920376	3.78826	2.04124	0.0434374	0	0	0	0	0
WBGene00010814	M01F1.8	chrIII:3499377-3502525	2.96718	43.4505	3.87221	8.56971e-06	Z2/Z3 enirhced	intrinsic	strictly maternal	yes	0
WBGene00010815	M01F1.9	chrIII:3493797-3499044	4.22464	16.8152	1.99286	0.00921867	0	0	0	0	0
WBGene00010843	M03C11.6	chrIII:10421697-10423895	0.4742	3.5701	2.91239	0.0234321	0	0	0	0	0
WBGene00010846	M04B2.2	chrIV:11528033-11530548	1.10416	5.91665	2.42183	0.0111389	0	0	0	yes	0
WBGene00010889	M18.3	chrIV:12105835-12108366	0.459705	3.26873	2.82995	0.0113287	0	0	0	yes	0
WBGene00010891	M18.6	chrIV:12121354-12122745	3.45666	13.7842	1.99557	0.0125123	0	0	0	yes	0
WBGene00010892	M18.8	chrIV:12124929-12126762	5.88806	27.1396	2.20454	0.00465917	0	0	0	yes	0
WBGene00010908	M88.5	chrIII:4553636-4560392	2.80521	46.6886	4.05689	1.73637e-05	0	0	0	0	0
WBGene00010911	M106.3	chrII:10857412-10860849	6.70966	28.8987	2.10669	0.0210112	0	0	0	0	0
WBGene00010912	M106.4	chrII:10863633-10868748	3.84113	22.5535	2.55375	0.0011716	0	0	0	0	0
WBGene00010913	M110.3	chrII:8214527-8216501	1.3503	12.0894	3.16239	0.000856317	0	0	0	yes	yes
WBGene00010923	M142.6	chrIII:10936146-10946400	12.8258	45.9636	1.84145	0.0256889	0	0	0	0	0
WBGene00011010	R04D3.2	chrX:13285070-13286564	0.0801047	37.524	8.87171	7.86582e-10	Z2/Z3 enirhced	oogenesis-enriched	strictly maternal	yes	yes
WBGene00011011	R04D3.3	chrX:13288926-13290559	0.0236785	3.53249	7.22096	0.00128674	Z2/Z3 enirhced	oogenesis-enriched	strictly maternal	yes	yes
WBGene00011012	R04D3.4	chrX:13287832-13288739	0.578432	4.45711	2.94589	0.02171	0	0	0	yes	0
WBGene00011029	R05D7.4	chrI:12181072-12183245	0.822039	7.80343	3.24683	0.00171509	0	0	0	0	0
WBGene00011036	R05D11.8	chrI:8602118-8605157	5.56603	26.4053	2.24611	0.00443138	0	0	0	yes	0
WBGene00011044	R05H10.3	chrII:14869867-14882961	1.12294	6.95828	2.63145	0.026711	0	0	0	yes	0
WBGene00011054	R06B9.3	chrII:13758344-13761151	0.637974	4.42446	2.79393	0.00471292	0	0	0	0	0
WBGene00011061	R06C7.1	chrI:7235381-7238787	0.459251	23.7663	5.69349	3.79749e-11	Z2/Z3 enirhced	intrinsic	strictly maternal	yes	yes
WBGene00011062	R06C7.2	chrI:7233657-7234499	0.240362	8.20842	5.09383	0.00022037	0	0	0	yes	yes
WBGene00011063	R06C7.4	chrI:7244934-7246094	0.324048	3.92306	3.5977	0.00496584	0	0	0	yes	yes
WBGene00011066	R06C7.9	chrI:7255508-7258698	0.147996	7.88393	5.73529	3.06806e-06	0	0	0	0	yes
WBGene00011087	R07B7.2	chrV:12056592-12059728	0.782829	13.5195	4.1102	1.59606e-06	Z2/Z3 enirhced	intrinsic	strictly maternal	yes	0
WBGene00011143	R08D7.2	chrIII:8967839-8969550	1.60607	7.38568	2.2012	0.0123556	0	0	0	yes	0
WBGene00011155	R09B3.2	chrI:11909348-11910095	4.20254	23.9795	2.51247	0.00863232	Z2/Z3 enirhced	intrinsic	na	yes	yes
WBGene00011201	R10E4.5	chrIII:4291656-4293269	0.929118	13.4378	3.85429	0.000176933	0	0	0	yes	0
WBGene00011216	R10E11.3	chrIII:9776445-9780262	5.95475	20.325	1.77114	0.0376596	0	0	0	yes	0
WBGene00011236	R11A8.1	chrIV:10355101-10357141	0.0231426	6.38322	8.10759	0.000137285	Z2/Z3 enirhced	intrinsic	strictly maternal	yes	0
WBGene00011237	R11A8.2	chrIV:10358124-10360119	4.17019	24.9805	2.58262	0.000820572	0	0	0	0	0
WBGene00011242	R11D1.1	chrV:12704364-12707741	2.75946	21.6019	2.9687	0.000200099	0	0	0	yes	0
WBGene00011268	R17.2	chrIII:10839925-10844836	2.00046	11.3491	2.50418	0.00121085	0	0	0	yes	0
WBGene00011271	R53.1	chrII:9943966-9947062	1.19382	16.2001	3.76235	9.17578e-05	0	0	0	0	0
WBGene00011274	R53.5	chrII:9969572-9970426	0.297114	6.03276	4.34373	0.00144741	0	0	0	0	0
WBGene00011276	R53.7	chrII:9971005-9974987	1.24088	17.416	3.81097	4.17759e-05	0	0	0	0	yes
WBGene00011282	R74.8	chrIII:4206250-4208239	5.68356	104.264	4.19731	5.5718e-06	0	0	0	yes	0
WBGene00011299	R107.4	chrIII:9045976-9050615	9.58151	37.9238	1.98478	0.0121237	0	0	0	0	0
WBGene00011302	R166.2	chrII:10533899-10537612	4.62522	14.5325	1.65168	0.0305465	0	0	0	0	0
WBGene00011320	T01C3.3	chrV:14991691-14992660	0.357094	5.15407	3.85134	0.00370189	0	0	0	yes	yes
WBGene00011323	T01C3.8	chrV:15002534-15005038	3.64146	14.3065	1.97408	0.0112674	0	0	0	0	0
WBGene00011324	T01C3.9	chrV:15005094-15006381	0.888713	20.0028	4.49234	1.41217e-06	Z2/Z3 enirhced	intrinsic	strictly maternal	yes	0
WBGene00011333	T01E8.5	chrII:10242541-10247578	6.33318	34.4234	2.44239	0.00169193	0	0	0	0	0
WBGene00011334	T01E8.6	chrII:10240250-10242432	5.00507	22.1222	2.14404	0.0113287	0	0	0	0	0
WBGene00011348	T01H3.2	chrII:7874201-7877942	1.032	6.11635	2.56722	0.00118754	0	0	0	0	0
WBGene00011350	T01H3.4	chrII:7880758-7882707	0.0666674	8.241	6.9497	1.11922e-05	Z2/Z3 enirhced	oogenesis-enriched	strictly maternal	yes	yes
WBGene00011352	T01H8.1	chrI:8573861-8580151	0.68315	15.9425	4.54454	0.000142287	0	0	0	yes	0
WBGene00011369	T02C12.4	chrIII:4041198-4042468	1.91724	13.5434	2.82048	0.0207944	0	0	0	0	0
WBGene00011376	T02E1.3	chrI:8211104-8218318	1.31429	25.3921	4.27203	2.21227e-05	0	0	0	yes	0
WBGene00011399	T03F6.3	chrIII:13389305-13390756	0.340046	22.8042	6.06742	1.39119e-06	Z2/Z3 enirhced	mixed_oogenesis-somatic	strictly maternal	0	0
WBGene00011415	T04A8.15	chrIII:4712536-4715153	2.10963	13.5322	2.68133	0.000438235	0	0	0	yes	0
WBGene00011449	T04H1.2	chrV:12242310-12245040	6.95469	44.6369	2.68218	0.000656799	0	0	0	0	0
WBGene00011464	T05B9.1	chrII:11260022-11261192	1.56633	86.3844	5.78531	5.77831e-11	Z2/Z3 enirhced	oogenesis-enriched	strictly maternal	yes	0
WBGene00011501	T05G5.7	chrIII:9757447-9762058	0.666174	36.4527	5.77398	0.000862062	0	0	0	yes	0
WBGene00011505	T05G11.1	chrV:15926652-15928352	0	1.70941	1.79769e+308	0.0377585	0	0	0	yes	0
WBGene00011513	T06C12.4	chrV:15867676-15868920	0.0105747	2.35146	7.7968	0.0125276	Z2/Z3 enirhced	intrinsic	strictly maternal	yes	yes
WBGene00011560	T07C4.3	chrIII:10352062-10355023	1.32972	45.963	5.11128	1.62845e-08	Z2/Z3 enirhced	oogenesis-enriched	na	yes	0
WBGene00011600	T07G12.10	chrIV:10555628-10558201	0.0600034	9.70607	7.3377	1.83301e-06	0	0	0	0	0
WBGene00011601	T07G12.11	chrIV:10558700-10560907	0.00728637	6.13515	9.71768	0.000112342	Z2/Z3 enirhced	oogenesis-enriched	strictly maternal	yes	0
WBGene00011610	T08D2.5	chrX:178241-179376	0.0724423	3.48485	5.58812	0.00328463	0	0	0	yes	0
WBGene00011612	T08D2.7	chrX:182690-190559	0.051539	5.24059	6.66792	0.000427595	0	0	0	0	0
WBGene00011625	T08G5.5	chrV:14034319-14038357	3.26794	14.2892	2.12847	0.0375759	0	0	0	yes	0
WBGene00011629	T08G11.1	chrI:8905632-8916798	1.67314	13.7519	3.039	0.000226691	0	0	0	0	0
WBGene00011639	T09A5.12	chrII:7866202-7870112	2.23796	7.93981	1.82692	0.0165501	0	0	0	0	0
WBGene00011645	T09B9.4	chrX:9771655-9774296	9.89776	49.9412	2.33506	0.00423112	0	0	0	0	0
WBGene00011731	T12D8.3	chrIII:13639841-13641587	3.10941	17.8536	2.52151	0.0023935	0	0	0	0	0
WBGene00011741	T12G3.6	chrIV:12030131-12030852	0.798239	11.0919	3.79655	0.00195537	Z2/Z3 enirhced	intrinsic	strictly maternal	yes	0
WBGene00011746	T13F2.6	chrIV:9778267-9784658	1.16404	48.7375	5.38782	9.48757e-11	Z2/Z3 enirhced	oogenesis-enriched	strictly maternal	yes	yes
WBGene00011747	T13F2.7	chrIV:9774582-9777614	7.20001	24.1754	1.74747	0.0238221	0	0	0	yes	0
WBGene00011759	T13H5.5	chrII:8525637-8526736	3.60861	20.1396	2.48052	0.00337646	0	0	0	yes	0
WBGene00011773	T14G10.3	chrIV:10158040-10158712	6.52165	29.85	2.19442	0.0157764	Z2/Z3 enirhced		strictly maternal	0	0
WBGene00011811	T16H12.1	chrIII:10083548-10085972	0.112794	2.45245	4.44246	0.00470969	0	0	0	yes	0
WBGene00011812	T16H12.2	chrIII:10086210-10086968	0.051042	6.93468	7.086	0.00328304	0	0	0	0	yes
WBGene00011813	T16H12.3	chrIII:10081413-10083194	1.83933	13.8791	2.91566	0.00335753	0	0	0	0	0
WBGene00011814	T16H12.4	chrIII:10088671-10090702	4.52826	13.5893	1.58544	0.049246	Z2/Z3 enirhced		na	0	0
WBGene00011819	T16H12.11	chrIII:10087131-10088454	1.57869	7.08857	2.16677	0.0191297	0	0	0	0	0
WBGene00011834	T19B10.6	chrV:11237430-11239305	3.07246	37.443	3.60723	1.15577e-05	Z2/Z3 enirhced	oogenesis-enriched	strictly maternal	yes	0
WBGene00011835	T19B10.8	chrV:11241884-11244706	2.88347	11.6497	2.01441	0.00830369	0	0	0	yes	0
WBGene00011872	T20G5.10	chrIII:10211052-10211854	3.90917	17.6045	2.17101	0.0385619	0	0	0	0	0
WBGene00011886	T21B10.4	chrII:8940831-8947627	1.68154	24.5183	3.86601	6.50164e-06	Z2/Z3 enirhced	intrinsic	strictly maternal	yes	yes
WBGene00011887	T21B10.5	chrII:8938987-8940426	5.91171	55.6944	3.23589	2.6208e-05	Z2/Z3 enirhced	mixed_oogenesis-somatic	strictly maternal	0	0
WBGene00011892	T21C9.4	chrV:10578404-10579089	5.77972	32.1974	2.47787	0.00403926	0	0	0	0	0
WBGene00011898	T21C9.13	chrV:10597293-10598643	0.220696	2.50035	3.502	0.0213426	Z2/Z3 enirhced	oogenesis-enriched	strictly maternal	yes	yes
WBGene00011908	T22A3.5	chrI:10598698-10606602	0.642886	8.07958	3.65165	1.41607e-05	0	0	0	yes	0
WBGene00011945	T23D8.7	chrI:9989791-9993581	0.386289	39.5886	6.67926	8.02543e-13	Z2/Z3 enirhced	oogenesis-enriched	strictly maternal	yes	0
WBGene00011959	T23G4.3	chrIV:13685118-13686988	0.35156	8.61986	4.61582	2.25941e-05	Z2/Z3 enirhced	oogenesis-enriched	strictly maternal	yes	0
WBGene00011986	T24D1.3	chrI:9958774-9960145	0.102315	2.73765	4.74185	0.00268146	0	0	0	yes	0
WBGene00011988	T24D1.5	chrI:9956141-9958347	0.0654491	13.1915	7.65502	3.16638e-06	Z2/Z3 enirhced		na	0	0
WBGene00011994	T24F1.2	chrII:11302826-11305602	6.76511	31.5252	2.22032	0.00426618	0	0	0	yes	0
WBGene00012002	T24H10.4	chrII:9109513-9111175	0.765605	12.8653	4.07074	2.53375e-05	0	0	0	yes	0
WBGene00012095	T27E9.5	chrIII:13471606-13475272	0.0496067	8.67259	7.44978	4.63844e-06	Z2/Z3 enirhced		strictly maternal	0	yes
WBGene00012104	T27F6.4	chrI:12484170-12486450	1.07942	124.792	6.85312	1.20381e-12	Z2/Z3 enirhced	oogenesis-enriched	na	yes	yes
WBGene00012109	T28A8.3	chrIII:13506065-13508372	0.257351	12.2101	5.5682	1.9709e-07	Z2/Z3 enirhced	oogenesis-enriched	strictly maternal	yes	0
WBGene00012110	T28A8.4	chrIII:13503588-13505337	0.412726	8.62175	4.38472	1.76954e-05	0	0	0	yes	0
WBGene00012111	T28A8.5	chrIII:13501528-13503357	0.653752	4.98502	2.93078	0.00577021	Z2/Z3 enirhced	intrinsic	strictly maternal	yes	0
WBGene00012112	T28A8.6	chrIII:13499102-13501405	0.901261	23.8725	4.72726	4.24263e-08	Z2/Z3 enirhced	oogenesis-enriched	strictly maternal	yes	0
WBGene00012128	T28F3.1	chrIV:17281422-17284162	2.80747	27.0855	3.27018	2.21227e-05	0	0	0	yes	0
WBGene00012149	VF13D12L.3	chrII:11705926-11713546	0.389239	6.5772	4.07874	0.000990875	0	0	0	0	0
WBGene00012164	W01A8.2	chrI:7053749-7056874	1.6693	16.9812	3.34662	0.000841703	0	0	0	0	0
WBGene00012166	W01A8.4	chrI:7068110-7069187	17.1001	64.051	1.90522	0.0132219	0	0	0	0	0
WBGene00012167	W01A8.5	chrI:7069440-7074732	3.70767	36.887	3.31453	3.7556e-05	Z2/Z3 enirhced	oogenesis-enriched	strictly maternal	yes	yes
WBGene00012182	W01D2.5	chrII:14812490-14814798	0.703014	4.38109	2.63966	0.0119208	0	0	0	0	yes
WBGene00012195	W02A11.5	chrI:12750025-12752057	0.514164	2.60006	2.33825	0.044079	0	0	0	0	yes
WBGene00012196	W02A11.8	chrI:12758513-12759459	0.00840633	3.08305	8.51866	0.0250775	0	0	0	yes	0
WBGene00012204	W02B12.9	chrII:11469945-11471969	14.4575	53.2219	1.8802	0.0125145	0	0	0	0	0
WBGene00012209	W02D9.3	chrI:12535311-12537656	2.71789	9.48689	1.80345	0.0260607	0	0	0	yes	0
WBGene00012210	W02D9.4	chrI:12537696-12538945	0.0383459	5.69451	7.21436	0.000810885	Z2/Z3 enirhced	oogenesis-enriched	strictly maternal	yes	0
WBGene00012234	W04A4.5	chrI:13663472-13674947	1.67006	5.33823	1.67646	0.0316587	0	0	0	yes	0
WBGene00012276	W05B10.1	chrV:12659688-12660313	4.96461	388.535	6.29022	1.03184e-12	Z2/Z3 enirhced	intrinsic	strictly maternal	yes	0
WBGene00012277	W05B10.2	chrV:12649907-12659670	1.56015	32.7784	4.39298	0.0411356	0	0	0	0	0
WBGene00012298	W06D4.4	chrI:9060505-9063154	0.803226	5.83006	2.85963	0.00143546	0	0	0	0	0
WBGene00012299	W06D11.1	chrX:12293698-12295243	1.06047	10.0256	3.24091	0.00370476	0	0	0	0	0
WBGene00012315	W06H3.1	chrV:16789307-16794985	0.163345	11.732	6.16639	0.00338893	Z2/Z3 enirhced	intrinsic	na	yes	yes
WBGene00012319	W07A8.2	chrV:20717840-20729238	1.81565	17.458	3.26533	0.000806066	0	0	0	yes	0
WBGene00012341	W08D2.5	chrIV:9817401-9824612	1.85592	11.3201	2.60869	0.000427595	0	0	0	0	0
WBGene00012360	W09D10.2	chrIII:10722058-10729344	1.43844	16.5929	3.52799	2.2667e-06	0	0	0	0	0
WBGene00012387	Y6B3B.1	chrI:13695684-13702942	0.0812145	0.477695	2.55628	0.0404608	0	0	0	0	0
WBGene00012423	Y10G11A.1	chrIV:16424617-16429654	2.97043	50.2003	4.07895	1.21689e-06	Z2/Z3 enirhced		na	0	0
WBGene00012431	Y11D7A.7	chrIV:9249512-9250845	1.31582	35.5643	4.7564	2.73709e-06	Z2/Z3 enirhced	oogenesis-enriched	strictly maternal	yes	0
WBGene00012474	Y18D10A.1	chrI:12787957-12806571	4.77779	22.0547	2.20667	0.00402039	0	0	0	yes	0
WBGene00012481	Y18D10A.11	chrI:12861961-12863522	0.277931	17.1178	5.94463	8.54806e-07	Z2/Z3 enirhced	oogenesis-enriched	strictly maternal	yes	yes
WBGene00012524	Y32B12B.4	chrV:16553313-16563470	1.22046	9.37112	2.9408	7.41427e-05	0	0	0	yes	0
WBGene00012527	Y32F6A.1	chrV:10436922-10441120	0.0681448	3.5445	5.70083	0.000968028	Z2/Z3 enirhced	oogenesis-enriched	na	yes	yes
WBGene00012544	Y37D8A.2	chrIII:12818622-12825547	3.45508	11.2431	1.70225	0.0342919	0	0	0	0	0
WBGene00012546	Y37D8A.4	chrIII:12829266-12838852	1.4153	6.1942	2.12981	0.0465618	0	0	0	0	yes
WBGene00012562	Y37H2A.1	chrV:18108241-18114698	10.3601	59.3693	2.51868	0.000988598	0	0	0	0	0
WBGene00012564	Y37H2A.4	chrV:18123948-18125138	0.2578	27.8151	6.75347	1.54201e-08	Z2/Z3 enirhced		na	0	0
WBGene00012565	Y37H2A.5	chrV:18125690-18127177	0.0969167	18.7605	7.59674	5.31062e-07	Z2/Z3 enirhced		na	0	0
WBGene00012566	Y37H2A.6	chrV:18127304-18128853	0	3.50374	1.79769e+308	0.0138177	0	0	0	0	0
WBGene00012567	Y37H2A.7	chrV:18131638-18134450	0.00439941	2.59562	9.20455	0.0106638	0	0	0	0	0
WBGene00012640	Y38H8A.7	chrIV:13455292-13456124	0.20314	3.64251	4.16438	0.019802	0	0	0	0	0
WBGene00012644	Y39A1A.5	chrIII:10604276-10613070	4.97345	14.9169	1.58463	0.0385904	0	0	0	0	0
WBGene00012659	Y39A1A.22	chrIII:10700595-10706923	4.43395	14.5719	1.71653	0.0470251	0	0	0	0	0
WBGene00012675	Y39B6A.13	chrV:19118483-19119338	2.37769	9.94771	2.0648	0.0436004	0	0	0	yes	0
WBGene00012678	Y39B6A.16	chrV:19099126-19101079	0.340466	10.5686	4.95614	4.47824e-05	0	0	0	yes	0
WBGene00012695	Y39B6A.37	chrV:18990828-18993770	1.38698	5.93499	2.0973	0.026942	0	0	0	0	0
WBGene00012700	Y39B6A.42	chrV:18968024-18969588	5.39413	34.2781	2.66782	0.00654011	0	0	0	0	0
WBGene00012715	Y39E4B.2	chrIII:13165635-13169410	2.96885	13.2326	2.15612	0.00571584	Z2/Z3 enirhced		strictly maternal	0	0
WBGene00012756	Y41C4A.9	chrIII:11710729-11718549	4.72613	16.3792	1.79313	0.0191724	0	0	0	yes	0
WBGene00012790	Y43D4A.4	chrIV:16766564-16768287	0	3.44039	1.79769e+308	0.0238539	0	0	0	0	0
WBGene00012795	Y43E12A.3	chrIV:10987884-10989161	0.0290668	3.35042	6.84883	0.000614342	Z2/Z3 enirhced	oogenesis-enriched	strictly maternal	yes	0
WBGene00012835	Y43F8C.14	chrV:19697542-19705161	0.24815	25.8216	6.70122	1.50343e-10	0	0	0	yes	0
WBGene00012845	Y43F11A.5	chrII:12114926-12130904	0.137086	12.0902	6.46261	7.77621e-07	0	0	0	0	0
WBGene00012860	Y45F3A.3	chrIII:10566099-10571507	1.55935	7.47289	2.26073	0.00842282	0	0	0	0	0
WBGene00012864	Y45F3A.9	chrIII:10589782-10595063	0.42582	5.59075	3.71472	0.00105177	0	0	0	0	0
WBGene00012879	Y45F10C.3	chrIV:13665344-13666845	0.0108864	38.0874	11.7726	6.02913e-05	Z2/Z3 enirhced	oogenesis-enriched	strictly maternal	yes	0
WBGene00012930	Y47D3A.17	chrIII:11257207-11270760	0.670826	4.93229	2.87825	0.0373617	0	0	0	0	0
WBGene00012935	Y47D3A.28	chrIII:11317470-11326553	2.83348	9.0871	1.68125	0.0359293	0	0	0	yes	0
WBGene00012951	Y47H9C.8	chrI:11893875-11896271	3.06463	10.2837	1.74658	0.0414978	0	0	0	yes	0
WBGene00012973	Y48A6B.13	chrIII:11052807-11062902	5.29563	14.9499	1.49726	0.0495493	0	0	0	0	0
WBGene00012981	Y48B6A.10	chrII:14214333-14217064	0.0223484	1.2849	5.84534	0.00498413	0	0	0	0	yes
WBGene00012983	Y48B6A.12	chrII:14226305-14234045	5.8408	32.1671	2.46135	0.00159175	0	0	0	0	0
WBGene00013001	Y48E1B.2	chrII:13533488-13541014	0.819528	3.56579	2.12136	0.0156475	0	0	0	0	0
WBGene00013014	Y48E1C.1	chrII:13414955-13424373	1.50415	12.8453	3.09421	0.0402224	0	0	0	0	0
WBGene00013015	Y48E1C.2	chrII:13424435-13428897	0.700202	7.39205	3.40013	0.000543527	0	0	0	0	0
WBGene00013019	Y48G10A.2	chrI:13477320-13487393	4.76344	18.2067	1.9344	0.0134286	Z2/Z3 enirhced		na	0	0
WBGene00013021	Y48G10A.4	chrI:13455504-13470340	3.60652	11.8262	1.71331	0.0256158	0	0	0	yes	0
WBGene00013041	Y49E10.22	chrIII:12466517-12468176	0.131235	2.0978	3.99866	0.0182115	0	0	0	0	0
WBGene00013055	Y50E8A.12	chrV:14782696-14783986	0.0754174	3.44135	5.51193	0.013269	0	0	0	0	0
WBGene00013152	Y53F4B.5	chrII:14982515-14983933	0.0493848	5.57039	6.81757	0.032699	0	0	0	0	0
WBGene00013188	Y54E2A.2	chrII:14747832-14752413	3.0457	12.3284	2.01714	0.0130259	Z2/Z3 enirhced		na	0	0
WBGene00013193	Y54E2A.8	chrII:14778289-14782643	0.127119	46.4952	8.51475	4.9656e-10	Z2/Z3 enirhced	intrinsic	strictly maternal	yes	0
WBGene00013196	Y54E2A.12	chrII:14798395-14800829	5.97576	27.8947	2.2228	0.00365726	0	0	0	yes	0
WBGene00013208	Y54G9A.5	chrII:13722893-13725735	0.904959	9.29445	3.36044	0.0262599	Z2/Z3 enirhced	intrinsic	strictly maternal	yes	yes
WBGene00013210	Y54G9A.7	chrII:13722893-13725735	2.12149	13.374	2.65628	0.0172117	0	0	0	0	0
WBGene00013212	Y54G11A.1	chrII:14256274-14269077	0.180855	4.77762	4.72339	4.95547e-05	0	0	0	yes	0
WBGene00013214	Y54G11A.3	chrII:14276574-14283883	0.13693	33.5751	7.93781	5.76905e-11	Z2/Z3 enirhced		na	0	0
WBGene00013220	Y54G11A.13	chrII:14307777-14310703	0.485619	3.64354	2.90744	0.00555654	0	0	0	0	0
WBGene00013221	Y54G11A.14	chrII:14318081-14320841	0.168924	1.87942	3.47584	0.00895325	0	0	0	0	0
WBGene00013224	Y55D9A.2	chrIV:12601104-12605402	2.88911	11.6206	2.00798	0.0307295	0	0	0	yes	0
WBGene00013231	Y56A3A.11	chrIII:11894683-11898169	1.41367	6.51107	2.20345	0.026438	Z2/Z3 enirhced		strictly maternal	0	0
WBGene00013232	Y56A3A.12	chrIII:11899240-11907287	2.17902	7.91628	1.86115	0.0463342	0	0	0	0	0
WBGene00013243	Y56A3A.31	chrIII:11982453-11989784	0.647667	3.34426	2.36836	0.0159534	0	0	0	0	0
WBGene00013246	Y57A10A.1	chrII:12133470-12147070	0.0619666	5.47621	6.46554	2.95026e-07	0	0	0	yes	0
WBGene00013247	Y57A10A.2	chrII:12147738-12150044	0.466656	9.53943	4.35347	5.98462e-05	0	0	0	yes	0
WBGene00013248	Y57A10A.3	chrII:12150827-12151813	0.443924	14.1785	4.99725	5.11675e-05	0	0	0	yes	0
WBGene00013249	Y57A10A.4	chrII:12151903-12154192	0.130365	8.0012	5.93958	1.7451e-05	0	0	0	0	0
WBGene00013250	Y57A10A.5	chrII:12154447-12156508	0.0969523	9.31069	6.58547	7.97023e-07	Z2/Z3 enirhced	intrinsic	strictly maternal	yes	yes
WBGene00013252	Y57A10A.7	chrII:12159418-12162595	0.0831279	4.66008	5.80888	2.19902e-05	0	0	0	0	yes
WBGene00013253	Y57A10A.8	chrII:12164774-12170698	1.94252	8.57809	2.14273	0.00933444	0	0	0	0	0
WBGene00013261	Y57A10A.20	chrII:12228254-12234019	0.606211	4.14627	2.77392	0.00709673	0	0	0	0	0
WBGene00013270	Y57A10A.31	chrII:12289340-12299020	3.22209	40.9039	3.66617	2.41135e-06	Z2/Z3 enirhced	intrinsic	strictly maternal	yes	0
WBGene00013339	Y59A8A.2	chrV:17871378-17888958	2.47577	10.655	2.10558	0.00757081	0	0	0	0	0
WBGene00013340	Y59A8A.3	chrV:17845717-17855965	1.58703	50.6056	4.99489	2.11514e-09	0	0	0	0	0
WBGene00013348	Y59A8B.11	chrV:18082406-18083417	0.0154137	6.37534	8.69215	0.000643971	0	0	0	0	0
WBGene00013349	Y59A8B.12	chrV:18085601-18086190	0.0176023	6.38191	8.50208	0.0198174	Z2/Z3 enirhced		strictly maternal	0	0
WBGene00013353	Y59A8B.21	chrV:17986250-17994236	0.400127	2.17143	2.44011	0.0340475	0	0	0	0	0
WBGene00013380	Y62E10A.14	chrIV:13399075-13400484	0.0384175	5.15939	7.06929	0.000330598	Z2/Z3 enirhced	oogenesis-enriched	na	yes	yes
WBGene00013383	Y62E10A.17	chrIV:13413651-13414847	0.393981	2.39017	2.60092	0.0369735	0	0	0	yes	0
WBGene00013419	Y65A5A.2	chrIV:16411987-16415050	0.248772	3.26823	3.71561	0.0228226	0	0	0	0	yes
WBGene00013425	Y66A7A.5	chrIII:11616658-11623869	2.20023	10.3166	2.22924	0.00361451	0	0	0	0	0
WBGene00013431	Y66D12A.5	chrIII:11581551-11588838	0.254768	12.0756	5.56677	3.88205e-08	Z2/Z3 enirhced		na	0	0
WBGene00013432	Y66D12A.6	chrIII:11580771-11581302	0.15995	4.8864	4.93307	0.0323576	Z2/Z3 enirhced		na	0	0
WBGene00013442	Y66D12A.16	chrIII:11524276-11526460	0.323698	39.2892	6.92334	7.73267e-05	0	0	0	0	0
WBGene00013443	Y66D12A.17	chrIII:11512764-11523659	0.172912	2.8344	4.03493	0.000213809	0	0	0	0	0
WBGene00013445	Y66D12A.19	chrIII:11509026-11509687	0.161411	4.75916	4.8819	0.0125788	0	0	0	0	0
WBGene00013464	Y67H2A.7	chrIV:13303721-13310778	1.05946	7.46646	2.8171	0.000499122	0	0	0	0	0
WBGene00013529	Y73F8A.24	chrIV:15445347-15453155	2.06237	13.5603	2.71701	0.000543445	0	0	0	0	0
WBGene00013550	Y75B8A.14	chrIII:12216683-12218533	4.59644	14.6738	1.67466	0.047214	0	0	0	yes	0
WBGene00013551	Y75B8A.16	chrIII:12218921-12223813	0.481693	2.7187	2.49673	0.0190714	0	0	0	0	yes
WBGene00013561	Y75B8A.31	chrIII:12351538-12354813	3.0544	12.0825	1.98395	0.0195323	0	0	0	yes	0
WBGene00013578	Y76A2B.6	chrIII:13550598-13555233	0.653769	2.94161	2.16975	0.0240796	0	0	0	0	0
WBGene00013596	Y87G2A.7	chrI:13572367-13575610	5.76118	28.1872	2.2906	0.00319089	0	0	0	yes	0
WBGene00013610	Y102A5C.1	chrV:16917237-16918454	0.0423075	7.56415	7.48212	9.19794e-05	Z2/Z3 enirhced	oogenesis-enriched	strictly maternal	yes	yes
WBGene00013611	Y102A5C.2	chrV:16918785-16919523	0	3.62182	1.79769e+308	0.0346809	Z2/Z3 enirhced	intrinsic	na	yes	yes
WBGene00013667	Y105E8A.2	chrI:14347501-14358313	4.8931	19.2287	1.97444	0.00944817	0	0	0	0	0
WBGene00013669	Y105E8A.8	chrI:14400744-14405637	2.54398	8.78542	1.78802	0.0344228	0	0	0	yes	0
WBGene00013674	Y105E8A.14	chrI:14466229-14468199	5.60894	21.0723	1.90955	0.0235664	Z2/Z3 enirhced	intrinsic	na	0	0
WBGene00013679	Y105E8A.21	chrI:14499714-14510542	2.93862	9.45576	1.68606	0.029056	0	0	0	0	0
WBGene00013680	Y105E8A.23	chrI:14552082-14565832	1.1453	8.71392	2.9276	0.000272657	0	0	0	0	0
WBGene00013691	Y105E8B.6	chrI:14662526-14662854	6.7869	59.8009	3.13934	0.00771686	Z2/Z3 enirhced	mixed_oogenesis-somatic	na	0	0
WBGene00013695	Y106G6A.2	chrI:9931867-9934281	2.86897	14.0489	2.29185	0.00685096	0	0	0	0	0
WBGene00013697	Y106G6A.5	chrI:9934875-9936005	6.91967	26.2388	1.92293	0.0384658	0	0	0	0	0
WBGene00013718	Y106G6H.5	chrI:10438065-10443556	4.59741	15.4908	1.75252	0.0209976	0	0	0	0	0
WBGene00013720	Y106G6H.8	chrI:10452168-10452858	2.80619	15.2448	2.44163	0.0151371	0	0	0	0	0
WBGene00013727	Y111B2A.1	chrIII:12492822-12495537	0.468324	2.74013	2.54867	0.0285821	Z2/Z3 enirhced	intrinsic	na	yes	0
WBGene00013729	Y111B2A.3	chrIII:12495984-12498921	0.560085	15.8433	4.82209	4.35389e-08	0	0	0	yes	0
WBGene00013738	Y111B2A.17	chrIII:12673575-12686129	1.69517	9.13886	2.43059	0.00181939	0	0	0	0	0
WBGene00013756	Y113G7B.4	chrV:20196937-20198145	0.701309	29.8414	5.41112	1.56996e-07	Z2/Z3 enirhced	intrinsic	na	yes	0
WBGene00013758	Y113G7B.7	chrV:20201618-20202728	0.356518	12.0063	5.07367	1.28159e-05	Z2/Z3 enirhced	intrinsic	strictly maternal	yes	0
WBGene00013792	Y116A8C.13	chrIV:16950032-16962768	0.286586	2.42154	3.07889	0.00275649	0	0	0	yes	0
WBGene00013857	ZC168.3	chrIV:10732811-10734612	5.90845	23.3296	1.98131	0.0100412	Z2/Z3 enirhced	intrinsic	na	yes	0
WBGene00013880	ZC410.2	chrIV:9074655-9078582	1.7517	8.26719	2.23864	0.0147421	0	0	0	0	0
WBGene00013892	ZC434.4	chrI:10331966-10333073	18.7886	63.4242	1.75517	0.0282735	0	0	0	0	0
WBGene00013894	ZC434.8	chrI:10348043-10349370	0.0752193	7.13306	6.56727	0.000157271	Z2/Z3 enirhced		strictly maternal	0	0
WBGene00014004	ZK593.8	chrIV:10937432-10939911	2.32378	7.57627	1.70502	0.0380439	0	0	0	yes	0
WBGene00014011	ZK632.2	chrIII:9799019-9802211	4.44251	22.9025	2.36606	0.0022963	0	0	0	0	0
WBGene00014016	ZK632.9	chrIII:9824803-9825358	2.07916	35.4882	4.09327	7.83797e-05	0	0	0	0	0
WBGene00014018	ZK632.11	chrIII:9827827-9829629	2.08435	9.65782	2.2121	0.00908083	0	0	0	0	0
WBGene00014022	ZK637.2	chrIII:8887670-8890069	8.81465	40.0743	2.1847	0.00832021	0	0	0	yes	0
WBGene00014028	ZK637.10	chrIII:8913689-8917851	0.600584	3.77079	2.65043	0.00777402	0	0	0	0	0
WBGene00014066	ZK675.2	chrII:7900595-7904582	0.350434	2.75176	2.97314	0.00149887	0	0	0	0	0
WBGene00014083	ZK795.3	chrIV:12559341-12560665	8.05687	34.388	2.09361	0.00639239	0	0	0	yes	0
WBGene00014087	ZK809.5	chrIV:11656713-11659375	6.35953	18.5383	1.54352	0.0494405	0	0	0	0	0
WBGene00014095	ZK829.4	chrIV:11953219-11955518	9.847	48.3413	2.2955	0.00275292	0	0	0	0	0
WBGene00014113	ZK856.12	chrV:10212922-10216279	0.0603195	4.40554	6.19055	3.11408e-06	0	0	0	yes	0
WBGene00014115	ZK858.1	chrI:9118107-9121754	16.3689	72.5855	2.14873	0.0121237	0	0	0	yes	yes
WBGene00014117	ZK858.3	chrI:9126131-9127065	0.574956	18.577	5.01392	8.91834e-06	0	0	0	yes	0
WBGene00014118	ZK858.5	chrI:9135839-9138349	2.34479	8.86504	1.91867	0.0247299	0	0	0	yes	0
WBGene00014124	ZK863.4	chrV:12181487-12184166	3.54819	13.0719	1.88131	0.0144984	0	0	0	yes	0
WBGene00014166	ZK945.4	chrII:10103053-10105645	0.311527	2.03748	2.70936	0.0233166	0	0	0	0	0
WBGene00014176	ZK1010.2	chrIII:12974973-12977761	2.1598	9.9588	2.20507	0.00828583	Z2/Z3 enirhced	intrinsic	na	yes	0
WBGene00014202	ZK1058.1	chrIII:3903093-3907669	4.02953	13.6418	1.75935	0.0272706	0	0	0	0	0
WBGene00014208	ZK1067.2	chrII:9215152-9222793	4.31503	28.2368	2.71013	0.000423269	0	0	0	0	0
WBGene00014230	ZK1128.4	chrIII:10118868-10120616	1.56058	7.95999	2.35069	0.00937769	0	0	0	yes	0
WBGene00014250	ZK1307.9	chrII:9649431-9650833	6.78096	25.2518	1.89682	0.0163016	0	0	0	yes	0
WBGene00014258	ZK1320.9	chrII:9684036-9686661	0.873555	11.2502	3.6869	6.30504e-05	0	0	0	0	0
WBGene00015009	B0041.5	chrI:4648277-4650771	7.53028	22.305	1.5666	0.0428615	0	0	0	0	0
WBGene00015011	B0041.8	chrI:4647309-4648276	9.85523	35.7182	1.8577	0.0176973	0	0	0	0	0
WBGene00015012	B0047.1	chrII:2040372-2041620	0.667672	5.18815	2.95801	0.0119849	0	0	0	0	0
WBGene00015013	B0047.2	chrII:2043093-2044064	0.0677894	3.08435	5.50776	0.017539	0	0	0	0	yes
WBGene00015014	B0047.3	chrII:2044706-2045590	0	13.7975	1.79769e+308	0.0117686	0	0	0	yes	0
WBGene00015029	B0207.6	chrI:5935538-5936946	1.1765	8.51347	2.85525	0.00602169	0	0	0	yes	0
WBGene00015064	B0228.7	chrII:7757137-7758387	0.913298	16.169	4.146	3.89184e-05	0	0	0	0	0
WBGene00015073	B0238.9	chrV:5275550-5278085	0.55836	10.7178	4.26267	9.80227e-06	Z2/Z3 enirhced	intrinsic	na	yes	yes
WBGene00015083	B0244.8	chrIII:5728133-5730965	0.994226	7.65079	2.94396	0.00139174	Z2/Z3 enirhced	oogenesis-enriched	strictly maternal	yes	yes
WBGene00015095	B0261.7	chrI:5269555-5270937	0.25614	106.827	8.70413	1.20381e-12	Z2/Z3 enirhced		strictly maternal	0	0
WBGene00015098	B0273.3	chrIV:5484036-5486201	0.187176	3.5994	4.26528	0.000652763	0	0	0	yes	0
WBGene00015101	B0280.3	chrIII:7123061-7124267	7.90483	41.1492	2.38006	0.00185685	Z2/Z3 enirhced		na	0	0
WBGene00015102	B0280.5	chrIII:7102023-7103929	0.046276	19.4572	8.71582	5.31062e-07	Z2/Z3 enirhced	oogenesis-enriched	strictly maternal	yes	yes
WBGene00015126	B0303.4	chrIII:8689768-8693393	3.54595	13.5138	1.93018	0.016582	0	0	0	0	0
WBGene00015134	B0304.2	chrII:4523640-4524523	0.0878165	19.313	7.78086	3.04056e-05	Z2/Z3 enirhced	oogenesis-enriched	strictly maternal	yes	yes
WBGene00015136	B0304.4	chrII:4522470-4523219	1.12392	9.08917	3.01561	0.0134286	Z2/Z3 enirhced	oogenesis-enriched	strictly maternal	yes	0
WBGene00015146	B0336.6	chrIII:5690061-5692685	7.73401	39.5283	2.3536	0.00361451	0	0	0	yes	0
WBGene00015147	B0336.7	chrIII:5694689-5697320	2.92545	12.4209	2.08604	0.00994942	0	0	0	yes	0
WBGene00015156	B0361.2	chrIII:7293569-7308826	2.39217	8.90795	1.89677	0.0415472	0	0	0	yes	0
WBGene00015160	B0361.6	chrIII:7275440-7277210	1.99481	12.2061	2.61327	0.00253937	0	0	0	yes	0
WBGene00015162	B0361.8	chrIII:7287800-7290500	1.54153	9.48913	2.62191	0.00209911	0	0	0	0	0
WBGene00015184	B0432.2	chrII:290579-291842	1.95243	9.20638	2.23737	0.0236263	0	0	0	0	0
WBGene00015238	B0511.13	chrI:10633507-10636006	0.911235	49.583	5.76588	2.78757e-10	0	0	0	0	0
WBGene00015245	B0524.6	chrIII:1902183-1905631	13.1576	57.6089	2.1304	0.00516021	0	0	0	0	0
WBGene00015283	C01B10.9	chrIV:6632210-6634961	1.18094	4.44801	1.91323	0.0260644	0	0	0	0	0
WBGene00015307	C01G5.5	chrIV:6524628-6526397	0.160607	2.13968	3.73578	0.0433796	0	0	0	yes	0
WBGene00015310	C01G5.8	chrIV:6548902-6555879	2.34175	12.7419	2.44392	0.00997962	0	0	0	yes	0
WBGene00015312	C01G8.1	chrI:5272849-5274325	0.279199	12.9636	5.53702	0.000207957	Z2/Z3 enirhced	oogenesis-enriched	strictly maternal	yes	yes
WBGene00015313	C01G8.6	chrI:5298780-5300334	1.53486	39.5467	4.68738	4.35389e-08	Z2/Z3 enirhced	intrinsic	strictly maternal	yes	0
WBGene00015404	C03H5.2	chrII:388832-392728	3.8467	16.1682	2.07146	0.00952318	0	0	0	0	0
WBGene00015413	C04C3.3	chrIV:3399666-3403900	16.12	93.0274	2.5288	0.00142302	0	0	0	0	0
WBGene00015454	C04G6.4	chrII:5081487-5083433	2.5405	15.6989	2.62748	0.000851778	0	0	0	0	0
WBGene00015456	C04G6.6	chrII:5099428-5099740	0	9.60277	1.79769e+308	0.0453333	Z2/Z3 enirhced	intrinsic	na	yes	0
WBGene00015463	C05C8.6	chrV:7234915-7237112	17.8209	61.1676	1.7792	0.025307	0	0	0	yes	0
WBGene00015499	C06A5.1	chrI:6012059-6021985	3.17576	9.67071	1.60652	0.0360224	0	0	0	0	0
WBGene00015504	C06A5.6	chrI:5983231-5985871	0.503173	44.832	6.47733	1.20381e-12	Z2/Z3 enirhced	intrinsic	strictly maternal	yes	yes
WBGene00015505	C06A5.8	chrI:6008106-6009608	0.0588775	6.79278	6.85014	0.00832021	Z2/Z3 enirhced	intrinsic	strictly maternal	yes	yes
WBGene00015512	C06A8.1	chrII:7772514-7777780	7.20458	33.8398	2.23173	0.00699737	0	0	0	0	0
WBGene00015513	C06A8.2	chrII:7779299-7781202	5.10902	23.3525	2.19246	0.00413434	0	0	0	yes	0
WBGene00015524	C06E1.9	chrIII:8606427-8609703	2.19827	6.94607	1.65983	0.0453168	0	0	0	0	0
WBGene00015526	C06E1.11	chrIII:8614681-8616130	0.0560572	1.07971	4.2676	0.0313132	0	0	0	0	0
WBGene00015554	C06G3.8	chrIV:7031548-7032548	2.78808	12.7546	2.19367	0.037377	Z2/Z3 enirhced	oogenesis-enriched	strictly maternal	yes	0
WBGene00015557	C06G4.1	chrIII:7987063-7990484	1.98118	16.4838	3.05661	4.65179e-05	0	0	0	yes	0
WBGene00015577	C07G3.9	chrV:3503126-3506349	1.06366	6.0291	2.50291	0.00446852	Z2/Z3 enirhced	mixed_oogenesis-somatic	na	0	0
WBGene00015591	C08C3.4	chrIII:7793377-7795344	1.33941	110.951	6.37218	1.88146e-08	Z2/Z3 enirhced		strictly maternal	0	yes
WBGene00015635	C09D4.4	chrI:5479553-5484646	4.69022	22.7789	2.27997	0.00749709	0	0	0	yes	0
WBGene00015642	C09E7.8	chrIII:6553521-6558522	0.409976	2.32737	2.50509	0.019452	0	0	0	0	0
WBGene00015677	C10F3.1	chrV:5996339-5999266	0.160921	5.20145	5.01449	2.82613e-05	Z2/Z3 enirhced		strictly maternal	0	yes
WBGene00015686	C10G11.6	chrI:6290007-6293857	1.23992	5.05593	2.02773	0.0388132	0	0	0	0	0
WBGene00015698	C10H11.10	chrI:4759818-4761324	0.820112	36.1119	5.46051	1.69036e-09	Z2/Z3 enirhced	intrinsic	na	yes	0
WBGene00015703	C11D2.7	chrIV:6154094-6155390	9.35306	33.2207	1.82857	0.0209211	0	0	0	0	0
WBGene00015731	C13B7.6	chrV:2530144-2531173	1.38069	10.0654	2.86594	0.00977762	0	0	0	0	0
WBGene00015745	C13F10.6	chrV:7219195-7220961	4.34721	15.3243	1.81765	0.0219311	0	0	0	yes	0
WBGene00015747	C13G5.2	chrIII:8616763-8618359	0.558541	9.29517	4.05675	0.000110743	Z2/Z3 enirhced	oogenesis-enriched	strictly maternal	yes	0
WBGene00015766	C14C11.2	chrV:5660911-5663357	0.0366961	3.87877	6.72383	0.0001167	0	0	0	yes	yes
WBGene00015814	C16A3.10	chrIII:6394181-6396129	0.327774	14.5755	5.4747	0.0062002	Z2/Z3 enirhced		strictly maternal	0	0
WBGene00015816	C16A11.3	chrII:4229553-4234326	0.0960691	6.82284	6.15016	5.49574e-07	0	0	0	yes	0
WBGene00015817	C16A11.4	chrII:4227048-4229135	0.0652914	52.0936	9.64	4.35389e-08	Z2/Z3 enirhced	intrinsic	strictly maternal	yes	0
WBGene00015818	C16A11.5	chrII:4223316-4226256	0.0331182	6.13952	7.53436	0.000255212	0	0	0	yes	0
WBGene00015819	C16A11.6	chrII:4236547-4237752	0.0764501	8.57118	6.80883	3.32998e-05	Z2/Z3 enirhced	oogenesis-enriched	na	yes	0
WBGene00015842	C16C8.4	chrII:3443585-3444368	0	18.286	1.79769e+308	0.00921867	Z2/Z3 enirhced	oogenesis-enriched	strictly maternal	yes	0
WBGene00015843	C16C8.5	chrII:3444730-3445367	0	15.431	1.79769e+308	0.0123281	Z2/Z3 enirhced	oogenesis-enriched	strictly maternal	yes	0
WBGene00015849	C16C8.11	chrII:3453766-3454615	0	7.35479	1.79769e+308	0.0169025	Z2/Z3 enirhced	intrinsic	strictly maternal	yes	0
WBGene00015850	C16C8.12	chrII:3452733-3453605	0	14.2747	1.79769e+308	0.00763185	Z2/Z3 enirhced	oogenesis-enriched	strictly maternal	yes	0
WBGene00015851	C16C8.13	chrII:3451423-3452332	0	6.62283	1.79769e+308	0.0141338	0	0	0	yes	yes
WBGene00015852	C16C8.14	chrII:3449255-3450997	0	15.4039	1.79769e+308	0.00689514	Z2/Z3 enirhced	intrinsic	strictly maternal	yes	0
WBGene00015853	C16C8.16	chrII:3445767-3448742	0	4.69874	1.79769e+308	0.00932705	0	0	0	yes	0
WBGene00015899	C17E7.4	chrV:3892840-3894558	0.0122627	1.12353	6.51762	0.0404971	0	0	0	yes	0
WBGene00015922	C17H11.2	chrX:8169879-8172818	2.95675	23.5697	2.99485	0.000121668	0	0	0	0	0
WBGene00015938	C17H12.13	chrIV:6770798-6779848	2.37391	53.3161	4.48923	2.17198e-05	Z2/Z3 enirhced	oogenesis-enriched	strictly maternal	yes	0
WBGene00015974	C18E3.5	chrI:4193242-4203307	0.188158	11.0817	5.88009	0.000126767	0	0	0	yes	yes
WBGene00015975	C18E3.6	chrI:4190159-4193118	0.896169	15.6951	4.1304	2.2667e-06	Z2/Z3 enirhced	intrinsic	strictly maternal	yes	yes
WBGene00015976	C18E3.9	chrI:4214297-4215754	1.70332	18.3094	3.42617	0.000174911	0	0	0	yes	0
WBGene00015978	C18F10.7	chrIII:6276003-6278305	2.00396	11.8351	2.56214	0.00751387	0	0	0	0	0
WBGene00015989	C18H2.2	chrIII:7678954-7680792	3.61785	12.6035	1.80061	0.0220941	0	0	0	yes	yes
WBGene00016011	C23G10.2	chrIII:6208157-6209088	2.07276	23.0571	3.47558	0.00914748	Z2/Z3 enirhced		strictly maternal	0	0
WBGene00016019	C23H3.3	chrII:57669-60040	2.8464	13.1426	2.20704	0.0238961	0	0	0	0	0
WBGene00016060	C24G6.3	chrV:5514331-5520435	2.47597	12.6157	2.34916	0.00211817	0	0	0	0	0
WBGene00016112	C25H3.3	chrII:5694174-5694721	2.50015	11.4153	2.19088	0.0492982	0	0	0	0	0
WBGene00016113	C25H3.4	chrII:5691702-5693905	1.82319	8.41267	2.2061	0.00802411	0	0	0	yes	yes
WBGene00016116	C25H3.7	chrII:5666272-5668912	3.91194	33.6972	3.10667	0.00188111	0	0	0	0	0
WBGene00016129	C26B2.7	chrIV:8016199-8016867	0.387257	4.03887	3.38259	0.0253112	0	0	0	0	0
WBGene00016143	C26E6.7	chrIII:4932440-4934882	3.95802	13.5029	1.77042	0.0236335	0	0	0	yes	0
WBGene00016144	C26E6.11	chrIII:4920396-4921711	1.24403	5.58696	2.16704	0.0364954	0	0	0	0	0
WBGene00016145	C26E6.12	chrIII:4930563-4932153	1.04888	4.29336	2.03325	0.0359975	0	0	0	0	0
WBGene00016151	C27A2.1	chrII:5062128-5067092	9.55643	32.4159	1.76216	0.0263523	0	0	0	yes	0
WBGene00016163	C27D9.1	chrII:4753451-4756780	0.0559914	2.76567	5.62628	0.0195076	0	0	0	yes	yes
WBGene00016169	C27F2.7	chrIII:4980607-4984439	0.70337	8.43907	3.58473	0.000250395	Z2/Z3 enirhced		strictly maternal	yes	0
WBGene00016171	C27F2.10	chrIII:4984986-4986896	2.12878	7.86365	1.88518	0.0331599	0	0	0	0	0
WBGene00016178	C28C12.2	chrIV:8499305-8500068	0.301692	4.04076	3.74348	0.0236335	Z2/Z3 enirhced	oogenesis-enriched	strictly maternal	yes	yes
WBGene00016182	C28C12.12	chrIV:8494548-8496352	1.87141	16.5396	3.14373	0.000157987	0	0	0	0	0
WBGene00016194	C28H8.3	chrIII:5908652-5914687	6.11268	19.9241	1.70464	0.0272493	0	0	0	0	0
WBGene00016236	C29H12.5	chrII:6110564-6113357	0.0929056	3.53384	5.24933	3.89184e-05	0	0	0	yes	yes
WBGene00016238	C30A5.3	chrIII:8225024-8226301	16.6862	54.625	1.7109	0.0320072	0	0	0	yes	0
WBGene00016263	C30F12.4	chrI:6972154-6973788	0.115841	4.04313	5.12525	0.00341027	Z2/Z3 enirhced	oogenesis-enriched	strictly maternal	yes	yes
WBGene00016277	C30G12.6	chrII:7292151-7295974	0.797834	8.21327	3.3638	2.76349e-05	0	0	0	yes	0
WBGene00016291	C31H1.8	chrIV:5811642-5814129	0.0107899	8.32176	9.59106	2.65068e-05	Z2/Z3 enirhced	oogenesis-enriched	strictly maternal	yes	yes
WBGene00016318	C32D5.11	chrII:6352509-6355879	8.17437	23.8644	1.54568	0.04873	0	0	0	yes	0
WBGene00016321	C32E8.3	chrI:3786596-3787478	0.487116	9.72563	4.31946	0.000656799	0	0	0	0	0
WBGene00016325	C32E8.9	chrI:3794558-3798056	0.732796	4.50529	2.62014	0.0306169	Z2/Z3 enirhced		strictly maternal	0	0
WBGene00016333	C32F10.8	chrI:5822843-5826158	1.41995	8.5934	2.59738	0.00404134	0	0	0	0	0
WBGene00016352	C33F10.2	chrII:4828554-4832463	1.19668	4.18978	1.80784	0.030537	0	0	0	yes	0
WBGene00016373	C33H5.6	chrIV:7776012-7777205	1.4946	7.95784	2.41262	0.0217076	0	0	0	yes	0
WBGene00016380	C33H5.14	chrIV:7792336-7794797	2.88997	10.6518	1.88197	0.0155144	0	0	0	yes	0
WBGene00016390	C34B2.5	chrI:10675174-10676800	0.42036	3.73343	3.15081	0.0217304	Z2/Z3 enirhced		strictly maternal	0	0
WBGene00016392	C34B2.7	chrI:10683274-10685613	3.40156	32.9822	3.27742	2.82613e-05	Z2/Z3 enirhced	intrinsic	strictly maternal	yes	0
WBGene00016402	C34D4.10	chrIV:7119992-7121401	0.0334152	0.859991	4.68575	0.034805	0	0	0	yes	0
WBGene00016408	C34E10.5	chrIII:5230530-5234459	0.889911	6.11402	2.78039	0.000785312	Z2/Z3 enirhced	intrinsic	na	yes	0
WBGene00016411	C34E10.10	chrIII:5226778-5227650	2.62445	10.7545	2.03485	0.0282749	0	0	0	0	0
WBGene00016421	C34G6.5	chrI:5872176-5874285	2.57125	8.96228	1.8014	0.0321474	0	0	0	yes	0
WBGene00016443	C35D10.6	chrIII:4859302-4861758	7.71306	40.4251	2.38988	0.0153147	0	0	0	0	0
WBGene00016444	C35D10.7	chrIII:4856156-4859197	3.37958	16.215	2.26241	0.00361448	0	0	0	yes	0
WBGene00016460	C35E7.8	chrI:10808595-10810373	0.0492975	9.40854	7.57631	0.000181001	Z2/Z3 enirhced	intrinsic	na	yes	0
WBGene00016485	C36C9.1	chrX:1682950-1686378	0.126586	0.740425	2.54823	0.0469042	0	0	0	yes	yes
WBGene00016582	C42C1.4	chrIV:12270472-12275961	1.85648	22.3564	3.59005	0.0150007	0	0	0	0	0
WBGene00016586	C42C1.8	chrIV:12291023-12301258	0.0293359	1.34637	5.52026	0.0292476	0	0	0	yes	yes
WBGene00016591	C42C1.13	chrIV:12278744-12279524	0.991767	5.95426	2.58585	0.0319622	Z2/Z3 enirhced		na	0	0
WBGene00016592	C42C1.15	chrIV:12287905-12289370	1.22276	17.0404	3.80075	2.20042e-05	0	0	0	yes	0
WBGene00016630	C44B7.10	chrII:6888499-6890374	4.49452	16.5458	1.88023	0.0149949	0	0	0	yes	0
WBGene00016632	C44B7.12	chrII:6891669-6893591	0.642017	8.83646	3.78279	5.1015e-05	Z2/Z3 enirhced	oogenesis-enriched	na	0	0
WBGene00016655	C44E4.6	chrI:4635743-4637329	13.0273	46.7406	1.84314	0.0292233	0	0	0	0	0
WBGene00016701	C46A5.5	chrIV:7757989-7759615	0	5.19198	1.79769e+308	0.0125916	0	0	0	yes	0
WBGene00016702	C46A5.6	chrIV:7760117-7763830	0.0956298	42.0212	8.77944	5.79971e-07	Z2/Z3 enirhced	intrinsic	na	yes	yes
WBGene00016750	C48E7.2	chrI:6255036-6257621	2.21513	15.1146	2.77048	0.000395488	0	0	0	yes	0
WBGene00016796	C50A2.2	chrIV:1170705-1176675	0.0376907	5.30774	7.13775	3.37224e-05	0	0	0	0	yes
WBGene00016799	C50C3.1	chrIII:8191747-8193776	0	20.1418	1.79769e+308	0.0114515	Z2/Z3 enirhced	intrinsic	strictly maternal	yes	yes
WBGene00016816	C50E3.5	chrV:7587976-7594719	2.83049	10.5291	1.89525	0.0211459	0	0	0	yes	0
WBGene00016930	C54G6.1	chrI:1011388-1014384	0.0675897	5.46916	6.33837	0.000947786	Z2/Z3 enirhced		strictly maternal	0	0
WBGene00016944	C55B7.5	chrI:6494291-6496108	3.88501	19.0033	2.29026	0.00398409	0	0	0	yes	0
WBGene00016955	C55C3.5	chrIV:5695775-5703457	1.55594	8.35029	2.42404	0.00260616	0	0	0	0	yes
WBGene00016993	CD4.8	chrV:5599259-5601313	0.827335	9.74941	3.55877	3.89184e-05	0	0	0	0	0
WBGene00017005	D1007.8	chrI:4604403-4605385	0.53686	5.6143	3.38649	0.0034591	0	0	0	yes	0
WBGene00017011	D1007.16	chrI:4603223-4604197	11.0264	33.9677	1.62321	0.0498504	0	0	0	0	0
WBGene00017025	D1037.1	chrI:3684804-3690146	5.81061	17.1396	1.56058	0.0463342	0	0	0	yes	0
WBGene00017031	D1044.6	chrIII:5535625-5543128	6.903	35.3899	2.35804	0.00323921	0	0	0	yes	0
WBGene00017069	D2096.1	chrIV:8396649-8398424	0.0987651	10.4833	6.72987	0.00819824	Z2/Z3 enirhced	intrinsic	na	yes	0
WBGene00017078	D2096.11	chrIV:8389133-8392850	0.233452	6.38233	4.77289	9.90019e-06	0	0	0	0	yes
WBGene00017079	D2096.12	chrIV:8363449-8366364	1.7411	6.86122	1.97847	0.0130798	0	0	0	0	0
WBGene00017101	E02H9.3	chrIII:2461900-2465048	0.0461146	4.93743	6.7424	0.0164635	Z2/Z3 enirhced		strictly maternal	0	0
WBGene00017134	EEED8.3	chrII:5414271-5415350	0.309258	12.6179	5.35052	3.07495e-05	0	0	0	yes	0
WBGene00017142	EEED8.14	chrII:5412204-5413997	0.0119795	11.5907	9.91818	0.000806558	Z2/Z3 enirhced	oogenesis-enriched	na	yes	0
WBGene00017153	E_BE45912.2	chrIII:1028791-1031145	0.250443	2.663	3.4105	0.0255728	0	0	0	0	0
WBGene00017165	F01F1.11	chrIII:5869633-5872352	3.27533	12.9456	1.98275	0.0122206	0	0	0	yes	0
WBGene00017177	F02E8.4	chrX:4454102-4457274	0.0245921	0.967745	5.29836	0.00457284	0	0	0	yes	yes
WBGene00017186	F07B7.2	chrV:8828142-8829887	0.0397301	1.5462	5.28235	0.0165416	0	0	0	0	0
WBGene00017261	F08F3.2	chrV:5433368-5437047	2.21482	9.54235	2.10715	0.0316844	0	0	0	yes	yes
WBGene00017263	F08F3.6	chrV:5418030-5420023	0.03402	1.15132	5.08076	0.0164589	0	0	0	yes	0
WBGene00017282	F09E5.2	chrII:5375249-5377072	2.61502	11.1776	2.09571	0.0108038	0	0	0	0	0
WBGene00017300	F09F7.3	chrIII:5557303-5564793	9.64858	31.5334	1.70849	0.030407	0	0	0	yes	0
WBGene00017316	F09G2.8	chrV:7184890-7193645	3.82437	15.6927	2.0368	0.00970569	0	0	0	yes	0
WBGene00017344	F10E7.2	chrII:7122199-7124344	2.47351	19.6555	2.9903	0.000731557	Z2/Z3 enirhced	mixed_oogenesis-somatic	na	0	0
WBGene00017397	F12A10.8	chrII:5498694-5501392	0.931228	4.89189	2.39319	0.00667744	0	0	0	yes	0
WBGene00017450	F14D2.1	chrII:3359148-3361357	0	12.8488	1.79769e+308	0.0317542	0	0	0	yes	0
WBGene00017451	F14D2.2	chrII:3359148-3361357	0.0593639	3.16591	5.73689	0.0109659	Z2/Z3 enirhced		na	0	0
WBGene00017452	F14D2.4	chrII:3350261-3358973	0.109106	13.654	6.96745	0.00164775	Z2/Z3 enirhced	intrinsic	strictly maternal	yes	0
WBGene00017456	F14D2.8	chrII:3347576-3349873	0.0424857	3.11817	6.19758	0.00128146	0	0	0	yes	0
WBGene00017460	F14D2.12	chrII:3345282-3346374	0.157848	24.3843	7.27127	1.93771e-06	Z2/Z3 enirhced		na	0	0
WBGene00017461	F14D2.13	chrII:3343739-3344970	0.0337823	20.8741	9.27123	0.000258951	Z2/Z3 enirhced	oogenesis-enriched	na	0	0
WBGene00017462	F14D2.14	chrII:3346822-3347518	0.379941	6.38417	4.07065	0.0254801	0	0	0	0	0
WBGene00017532	F16H11.3	chrX:4647498-4649167	0.078538	2.14087	4.76867	0.0120159	0	0	0	yes	0
WBGene00017548	F18A1.7	chrII:7662687-7663706	5.35457	140.08	4.70934	1.02228e-07	Z2/Z3 enirhced	oogenesis-enriched	strictly maternal	yes	0
WBGene00017549	F18A1.8	chrII:7689658-7690505	0.0250287	27.5623	10.1049	5.91781e-05	Z2/Z3 enirhced		strictly maternal	0	0
WBGene00017587	F19B10.5	chrII:3655700-3657735	0.072316	2.04212	4.81961	0.0182555	0	0	0	0	0
WBGene00017620	F20A1.9	chrV:7049416-7051273	0.172231	8.92201	5.69495	4.7231e-06	Z2/Z3 enirhced	intrinsic	strictly maternal	yes	0
WBGene00017641	F20D12.1	chrIV:7957567-7962109	0.0848073	24.1191	8.15177	4.23584e-05	Z2/Z3 enirhced	intrinsic	strictly maternal	yes	0
WBGene00017643	F20D12.4	chrIV:7943611-7946807	4.00056	18.0663	2.17502	0.00423823	0	0	0	yes	0
WBGene00017646	F20H11.1	chrIII:6587810-6592122	5.28621	16.3183	1.62619	0.0424796	0	0	0	yes	0
WBGene00017674	F21F3.4	chrI:4896003-4897542	0.269312	5.84116	4.4389	0.000157452	Z2/Z3 enirhced	intrinsic	strictly maternal	yes	0
WBGene00017675	F21F3.6	chrI:4906823-4914050	48.7725	216.557	2.15061	0.0388323	0	0	0	0	0
WBGene00017686	F21H12.6	chrII:6092737-6097569	3.59012	11.9939	1.7402	0.0208543	0	0	0	0	0
WBGene00017733	F23C8.4	chrI:2434005-2435638	27.3397	112.701	2.04343	0.00848899	0	0	0	yes	0
WBGene00017737	F23C8.8	chrI:2429773-2432583	0.0514834	1.18059	4.51926	0.0219126	0	0	0	0	0
WBGene00017746	F23F1.5	chrII:30115-31574	6.78168	21.8374	1.68709	0.0381386	0	0	0	yes	0
WBGene00017750	F23F1.10	chrII:41526-41978	2.78068	37.6767	3.76017	0.00241622	Z2/Z3 enirhced		na	0	0
WBGene00017759	F23H11.3	chrIII:895774-901433	2.55078	17.1524	2.7494	0.0254261	Z2/Z3 enirhced		strictly maternal	0	0
WBGene00017775	F25B5.3	chrIII:5948842-5953486	3.72693	44.1895	3.56764	0.00416192	0	0	0	0	0
WBGene00017826	F26F4.4	chrIII:4899677-4903107	1.77498	13.7147	2.94985	0.000139166	0	0	0	0	0
WBGene00017827	F26F4.5	chrIII:4887884-4891216	2.94913	11.3257	1.94124	0.0135966	0	0	0	0	0
WBGene00017828	F26F4.6	chrIII:4891582-4893373	10.6009	51.0758	2.26845	0.00319478	0	0	0	yes	0
WBGene00017837	F26G1.1	chrII:4790310-4795625	4.28436	16.0834	1.90842	0.0113357	0	0	0	yes	0
WBGene00017887	F28B3.6	chrI:4950581-4951484	18.5716	60.8039	1.71107	0.0268467	0	0	0	0	0
WBGene00017919	F29B9.1	chrIV:4665242-4667272	3.19432	11.1116	1.79849	0.0430611	0	0	0	yes	0
WBGene00017986	F32D1.7	chrV:4374959-4376165	0.308576	43.3434	7.13404	2.19706e-09	Z2/Z3 enirhced	intrinsic	strictly maternal	yes	yes
WBGene00017996	F33D4.4	chrIV:7703876-7706893	3.11032	14.6795	2.23866	0.00467064	0	0	0	0	0
WBGene00018006	F33D11.9	chrI:5857551-5862560	3.97183	39.3907	3.30998	0.000210554	Z2/Z3 enirhced	oogenesis-enriched	na	yes	0
WBGene00018010	F33E11.2	chrV:296598-300008	0.0375608	3.76988	6.64915	0.000793094	Z2/Z3 enirhced	intrinsic	strictly maternal	yes	yes
WBGene00018015	F33G12.3	chrII:5031809-5034036	1.69234	12.0399	2.83074	0.000651657	0	0	0	yes	0
WBGene00018016	F33G12.4	chrII:5034149-5036431	2.11215	24.5053	3.53631	1.10666e-05	0	0	0	yes	0
WBGene00018017	F33G12.5	chrII:5036553-5040091	4.86312	22.8027	2.22925	0.00308958	0	0	0	0	0
WBGene00018071	F35H10.6	chrIV:8299922-8300634	1.41133	9.52021	2.75393	0.0109255	0	0	0	0	0
WBGene00018072	F35H10.7	chrIV:8294676-8299827	2.02238	15.0872	2.8992	0.00235241	0	0	0	yes	0
WBGene00018088	F36D4.2	chrV:9400309-9401736	1.95491	9.23995	2.24079	0.0272444	0	0	0	0	0
WBGene00018099	F36F12.8	chrV:2090679-2091614	0.0285914	3.56886	6.96374	0.00365902	0	0	0	yes	0
WBGene00018118	F36H12.2	chrIV:5249384-5308853	0.0150927	7.14934	8.88782	0.0416962	Z2/Z3 enirhced	intrinsic	strictly maternal	yes	yes
WBGene00018151	F37C12.3	chrIII:7180667-7181845	7.73584	40.9045	2.40263	0.00471021	0	0	0	0	0
WBGene00018181	F38E1.9	chrV:8358183-8359143	3.25307	11.1885	1.78215	0.0471058	0	0	0	0	0
WBGene00018223	F40B1.1	chrII:2520969-2522049	0.0784711	2.14319	4.77145	0.0108295	0	0	0	yes	0
WBGene00018230	F40E3.2	chrI:2642741-2643705	3.73207	18.3012	2.29389	0.00762742	0	0	0	yes	0
WBGene00018249	F40H3.1	chrII:6179925-6184319	0.299139	15.9059	5.7326	0.000733296	0	0	0	0	0
WBGene00018269	F41C3.3	chrII:4742132-4745276	0.388147	3.30748	3.09106	0.00537279	0	0	0	0	0
WBGene00018335	F42A9.6	chrIV:8609540-8611477	0.220338	18.8717	6.42036	0.00133937	Z2/Z3 enirhced	intrinsic	strictly maternal	yes	0
WBGene00018390	F43E2.1	chrII:7375236-7377539	1.13886	4.14391	1.86341	0.037377	0	0	0	0	0
WBGene00018423	F44E2.10	chrIII:8829411-8831028	0.0498072	2.34046	5.5543	0.00453104	0	0	0	0	yes
WBGene00018427	F44E7.5	chrV:5778800-5780905	1.25569	8.50262	2.75943	0.0028352	Z2/Z3 enirhced	oogenesis-enriched	strictly maternal	yes	0
WBGene00018481	F45F2.9	chrV:8512725-8513421	5.99054	23.6947	1.9838	0.0221766	0	0	0	0	0
WBGene00018482	F45F2.10	chrV:8513556-8518293	3.13135	12.0231	1.94096	0.00937904	0	0	0	yes	0
WBGene00018483	F45F2.11	chrV:8519324-8520741	0.269486	37.902	7.13592	2.78757e-10	Z2/Z3 enirhced	intrinsic	na	yes	yes
WBGene00018491	F46E10.10	chrIII:6606196-6608060	6.46268	21.726	1.74922	0.0226224	0	0	0	0	0
WBGene00018509	F46F11.6	chrI:5616601-5618554	2.41636	15.8396	2.71263	0.000516454	0	0	0	0	0
WBGene00018510	F46F11.7	chrI:5620782-5622924	1.1661	8.17088	2.8088	0.00405657	0	0	0	yes	0
WBGene00018511	F46F11.8	chrI:5624604-5626291	1.15112	36.9177	5.0032	7.65979e-09	Z2/Z3 enirhced		na	0	0
WBGene00018512	F46F11.9	chrI:5610382-5616405	1.65317	13.1094	2.9873	6.43727e-05	0	0	0	0	0
WBGene00018513	F46F11.10	chrI:5623146-5624478	0.216941	2.49195	3.5219	0.00739676	0	0	0	yes	0
WBGene00018578	F47G3.3	chrX:2375989-2378645	5.53489	17.3723	1.65017	0.0439667	0	0	0	0	0
WBGene00018585	F48A11.4	chrII:213190-216621	4.22393	31.7159	2.90855	0.000140395	Z2/Z3 enirhced	oogenesis-enriched	na	yes	0
WBGene00018595	F48C1.2	chrI:5319733-5321070	0.00674112	1.12065	7.37713	0.0488045	Z2/Z3 enirhced	oogenesis-enriched	strictly maternal	yes	0
WBGene00018598	F48C1.5	chrI:5317639-5318113	1.64567	10.5747	2.68387	0.0377585	0	0	0	yes	0
WBGene00018609	F48E8.2	chrIII:5464358-5467933	1.56602	6.4819	2.04931	0.0152794	0	0	0	yes	0
WBGene00018612	F48E8.6	chrIII:5443267-5446455	2.17683	7.06047	1.69753	0.0308286	0	0	0	yes	0
WBGene00018613	F48E8.7	chrIII:5446470-5448380	4.00897	27.4708	2.77659	0.00361451	Z2/Z3 enirhced	oogenesis-enriched	strictly maternal	yes	0
WBGene00018659	F52C6.2	chrII:1926474-1927253	0.0727636	13.0368	7.48515	0.00168493	Z2/Z3 enirhced	intrinsic	strictly maternal	yes	0
WBGene00018660	F52C6.3	chrII:1924771-1925701	0.00858362	3.79461	8.78815	0.0201226	0	0	0	yes	0
WBGene00018661	F52C6.4	chrII:1922870-1924262	0	2.0403	1.79769e+308	0.0340975	0	0	0	yes	0
WBGene00018665	F52C6.8	chrII:1916802-1917957	0.058339	8.14642	7.12556	0.00138532	Z2/Z3 enirhced	oogenesis-enriched	strictly maternal	yes	0
WBGene00018667	F52C6.10	chrII:1920020-1921109	0.0583185	8.5025	7.18779	0.00123384	Z2/Z3 enirhced	intrinsic	strictly maternal	yes	yes
WBGene00018668	F52C6.11	chrII:1921621-1922749	0.206416	9.96696	5.59353	5.56328e-05	Z2/Z3 enirhced	intrinsic	strictly maternal	yes	0
WBGene00018674	F52C9.3	chrIII:5321849-5326232	4.82191	17.4873	1.85863	0.0182555	0	0	0	0	0
WBGene00018679	F52C12.2	chrIV:1953578-1959725	2.10262	10.2543	2.28597	0.00454911	0	0	0	yes	0
WBGene00018698	F52E1.10	chrV:8411770-8413462	0.171669	4.40426	4.6812	0.000361305	0	0	0	yes	yes
WBGene00018717	F52H2.5	chrX:2557979-2559552	1.5563	10.2187	2.71502	0.00403286	0	0	0	0	0
WBGene00018721	F53A3.2	chrIII:1945110-1950248	3.10852	14.0685	2.17817	0.00538487	0	0	0	yes	0
WBGene00018765	F53F10.3	chrI:3827221-3828132	4.89142	28.7881	2.55715	0.00443065	0	0	0	0	0
WBGene00018793	F54C4.1	chrIII:87559-89228	5.51945	25.5994	2.21352	0.0103774	0	0	0	0	0
WBGene00018806	F54D10.5	chrII:3807097-3808225	2.11093	17.3611	3.03991	0.000522624	0	0	0	yes	0
WBGene00018814	F54D11.4	chrV:4616167-4617745	14.4545	42.9025	1.56954	0.0451063	0	0	0	0	0
WBGene00018833	F54F2.5	chrIII:8787010-8792257	0.471171	41.6318	6.46529	6.48035e-09	Z2/Z3 enirhced	oogenesis-enriched	strictly maternal	yes	0
WBGene00018846	F54H12.6	chrIII:7972316-7973321	15.2705	111.513	2.86839	0.000207434	0	0	0	0	0
WBGene00018862	F55A12.1	chrI:5368480-5372474	0.253641	14.0115	5.78768	1.69036e-09	0	0	0	yes	yes
WBGene00018867	F55A12.10	chrI:5367012-5367832	0.0333452	3.4577	6.69619	0.0212176	Z2/Z3 enirhced		na	0	0
WBGene00018900	F55G1.4	chrIV:7478440-7485508	3.17306	14.9852	2.23959	0.00306597	0	0	0	0	0
WBGene00018902	F55G1.6	chrIV:7473505-7474942	0.604957	13.0771	4.43406	8.13513e-06	Z2/Z3 enirhced	intrinsic	strictly maternal	yes	yes
WBGene00018908	F56A3.1	chrI:5190150-5195181	0.399168	5.01736	3.65186	8.17828e-05	0	0	0	yes	0
WBGene00018921	F56A6.1	chrI:614725-629447	0.213715	2.84922	3.7368	0.035632	0	0	0	0	0
WBGene00018923	F56A6.4	chrI:614725-629447	2.13509	13.4318	2.65329	0.00456773	0	0	0	0	0
WBGene00018948	F56C9.3	chrIII:7311232-7313045	1.39989	100.263	6.16233	7.62416e-12	Z2/Z3 enirhced	oogenesis-enriched	strictly maternal	yes	yes
WBGene00018950	F56C9.6	chrIII:7308933-7310709	0.569851	21.3637	5.22844	0.000128884	Z2/Z3 enirhced	oogenesis-enriched	strictly maternal	yes	yes
WBGene00018959	F56D1.1	chrII:5478560-5480280	3.13781	29.2349	3.21986	5.17177e-05	0	0	0	yes	0
WBGene00018991	F56F11.4	chrIII:2855545-2865378	0.210592	18.482	6.45552	3.3816e-08	Z2/Z3 enirhced	oogenesis-enriched	na	yes	0
WBGene00018995	F56H1.5	chrI:5754347-5760796	2.25601	19.679	3.12482	2.20112e-05	0	0	0	yes	0
WBGene00019001	F57B10.3	chrI:6569494-6572599	4.13918	16.4757	1.99293	0.0239794	0	0	0	0	0
WBGene00019002	F57B10.4	chrI:6566173-6568906	0.212352	8.61476	5.34228	1.39119e-06	0	0	0	yes	0
WBGene00019004	F57B10.6	chrI:6558700-6562300	1.37164	13.1752	3.26385	3.3981e-05	0	0	0	yes	0
WBGene00019009	F57C9.2	chrI:4844908-4847917	2.8618	10.9885	1.941	0.019784	0	0	0	0	0
WBGene00019013	F57C9.7	chrI:4825169-4826634	0.541757	23.0897	5.41346	2.61509e-08	0	0	0	yes	yes
WBGene00019075	F59A3.2	chrI:5512050-5516028	1.28493	14.699	3.51596	7.41427e-05	Z2/Z3 enirhced	oogenesis-enriched	na	yes	0
WBGene00019077	F59A3.4	chrI:5507125-5509172	18.8438	96.5366	2.35699	0.00471292	0	0	0	yes	0
WBGene00019079	F59A3.6	chrI:5509409-5511692	0.195563	12.6513	6.0155	2.38799e-07	0	0	0	0	0
WBGene00019129	F59G1.8	chrII:5906534-5907520	4.43955	35.7712	3.01031	0.0011666	0	0	0	0	0
WBGene00019130	F59H5.1	chrII:2504882-2514851	1.49162	7.9922	2.42171	0.00222237	0	0	0	0	0
WBGene00019132	F59H6.1	chrII:2035791-2039391	0.0914475	2.20335	4.59061	0.0107219	0	0	0	yes	0
WBGene00019133	F59H6.2	chrII:2019658-2022446	0.0580117	1.03437	4.15626	0.0219025	0	0	0	0	0
WBGene00019138	F59H6.8	chrII:2025646-2026615	0.0087292	2.79616	8.32338	0.0292838	0	0	0	yes	0
WBGene00019139	F59H6.9	chrII:2027629-2028817	0.0208156	9.05225	8.76447	0.000151235	Z2/Z3 enirhced	intrinsic	na	yes	0
WBGene00019140	F59H6.10	chrII:2029329-2030468	0.0166418	5.94919	8.48174	0.00497184	Z2/Z3 enirhced	oogenesis-enriched	na	yes	0
WBGene00019141	F59H6.11	chrII:2030843-2031943	0.156778	17.4298	6.79669	6.90379e-05	Z2/Z3 enirhced	oogenesis-enriched	strictly maternal	yes	yes
WBGene00019142	F59H6.12	chrII:2032497-2033222	1.45597	11.0662	2.9261	0.0111849	0	0	0	0	0
WBGene00019163	H06H21.6	chrIV:4807424-4809966	1.74606	6.82174	1.96603	0.0179906	0	0	0	yes	0
WBGene00019217	H20J04.2	chrII:4340154-4350988	3.68017	23.873	2.69754	0.000387386	0	0	0	0	0
WBGene00019247	H27M09.3	chrI:6847509-6849922	0.179989	10.1053	5.81106	1.32288e-07	Z2/Z3 enirhced		na	0	0
WBGene00019254	H31G24.3	chrI:4116852-4118164	0.14672	4.06779	4.79311	0.000661838	0	0	0	0	0
WBGene00019296	K02B2.3	chrIV:5937434-5939220	1.92786	12.0003	2.638	0.00202907	0	0	0	0	0
WBGene00019353	K03B4.1	chrV:4689315-4692419	1.93648	14.7201	2.92627	0.0216177	0	0	0	0	yes
WBGene00019433	K06A5.6	chrI:6464299-6467517	0.912002	8.14776	3.15929	0.000812521	Z2/Z3 enirhced		strictly maternal	0	0
WBGene00019441	K06B9.4	chrIV:4188998-4195887	4.8724	17.4623	1.84154	0.0264393	0	0	0	yes	0
WBGene00019457	K06H7.3	chrIII:8088415-8091534	4.48442	13.5683	1.59724	0.0445177	0	0	0	0	0
WBGene00019498	K07E8.7	chrII:641022-650374	0.417604	3.71498	3.15315	0.00590637	0	0	0	yes	0
WBGene00019541	K08F11.1	chrIV:4724853-4725305	0.236973	6.45248	4.76706	0.00798631	0	0	0	0	0
WBGene00019569	K09D9.12	chrV:4002311-4005168	0.00857169	0.391595	5.51364	0.0483587	0	0	0	0	yes
WBGene00019586	K09F6.3	chrII:2256310-2261106	0.0239674	0.291788	3.60577	0.0415193	0	0	0	0	0
WBGene00019598	K09H9.7	chrI:3150410-3151981	1.58031	101.296	6.00222	2.48366e-11	Z2/Z3 enirhced	intrinsic	na	yes	yes
WBGene00019600	K09H11.3	chrV:5717888-5722064	0.398428	11.7992	4.88822	1.83262e-08	0	0	0	yes	yes
WBGene00019606	K10B2.3	chrII:6365705-6366807	0.479262	46.3772	6.59646	0.000708898	Z2/Z3 enirhced	oogenesis-enriched	strictly maternal	yes	0
WBGene00019608	K10B2.5	chrII:6361154-6365272	0.197866	47.7339	7.91435	0	Z2/Z3 enirhced	intrinsic	strictly maternal	yes	0
WBGene00019629	K10D2.3	chrIII:5173905-5180466	4.33591	15.6686	1.85347	0.0151051	0	0	0	yes	yes
WBGene00019631	K10D2.5	chrIII:5172695-5173297	0.688463	9.6183	3.80433	0.00557872	Z2/Z3 enirhced	intrinsic	strictly maternal	yes	0
WBGene00019664	K11H12.8	chrIV:655383-658595	4.02487	12.9264	1.6833	0.0497793	0	0	0	0	0
WBGene00019683	K12H6.2	chrII:2812962-2815549	0.225626	2.65145	3.55478	0.019452	Z2/Z3 enirhced		strictly maternal	0	0
WBGene00019692	M01A10.1	chrI:5563832-5566242	0.376561	12.7074	5.07664	2.95026e-07	Z2/Z3 enirhced	intrinsic	strictly maternal	yes	yes
WBGene00019712	M01E11.3	chrI:5573245-5576741	0.0429225	11.814	8.10455	3.48058e-07	0	0	0	yes	yes
WBGene00019713	M01E11.4	chrI:5566356-5570082	3.91956	31.8095	3.02069	0.00260459	0	0	0	0	0
WBGene00019715	M01G5.1	chrIII:1498007-1508531	0.637702	5.04459	2.98378	0.000530661	0	0	0	0	0
WBGene00019723	M02B7.1	chrIV:3805546-3806562	0.555208	9.78788	4.1399	0.000174437	Z2/Z3 enirhced	intrinsic	strictly maternal	yes	0
WBGene00019778	M57.2	chrIV:3527349-3532517	4.45799	13.3077	1.5778	0.0445177	0	0	0	0	0
WBGene00019789	M116.2	chrIV:8398849-8399780	0.826676	4.63071	2.48584	0.031532	0	0	0	yes	0
WBGene00019792	M116.5	chrIV:8414279-8420995	0.12512	6.40939	5.6788	3.66493e-08	0	0	0	yes	0
WBGene00019795	M151.3	chrII:3627200-3630863	0.011373	1.98758	7.44925	0.000404562	0	0	0	0	0
WBGene00019799	M151.7	chrII:3622316-3624001	0.00522391	2.55488	8.93391	0.0137593	0	0	0	0	0
WBGene00019801	PAR2.3	chrIII:8749690-8761009	2.30881	21.2803	3.2043	0.000437781	0	0	0	0	0
WBGene00019811	R01H2.3	chrIII:7058462-7060537	0.0251172	14.1135	9.13419	1.13108e-06	Z2/Z3 enirhced	oogenesis-enriched	strictly maternal	yes	yes
WBGene00019820	R02D3.2	chrIV:240551-244129	3.05874	12.8892	2.07516	0.00746226	0	0	0	0	0
WBGene00019821	R02D3.3	chrIV:225439-231774	3.93216	12.9076	1.71482	0.0295404	0	0	0	0	0
WBGene00019822	R02D3.4	chrIV:232508-237450	3.01224	19.7537	2.71322	0.000331348	0	0	0	0	0
WBGene00019833	R02F2.4	chrIII:5484247-5485901	0.235183	4.48387	4.25289	0.000509562	Z2/Z3 enirhced	oogenesis-enriched	strictly maternal	yes	yes
WBGene00019842	R02F11.4	chrV:4810912-4818649	4.92396	14.8623	1.59376	0.0380625	0	0	0	yes	0
WBGene00019894	R05F9.11	chrII:4911862-4914210	0.054305	13.3333	7.93973	4.53816e-06	Z2/Z3 enirhced	intrinsic	strictly maternal	yes	0
WBGene00019900	R05G6.7	chrIV:7503610-7507886	21.9667	197.073	3.16534	9.54821e-05	0	0	0	0	0
WBGene00019941	R07G3.5	chrII:7597533-7598704	3.89645	30.3435	2.96116	0.000161774	Z2/Z3 enirhced	intrinsic	strictly maternal	yes	0
WBGene00019997	R10F2.6	chrIII:2937094-2943634	0.0435608	0.441288	3.34062	0.0278039	0	0	0	0	0
WBGene00020030	R12E2.1	chrI:4182222-4184994	5.24724	18.1881	1.79336	0.0232261	0	0	0	0	0
WBGene00020031	R12E2.2	chrI:4178813-4182160	6.31125	19.8979	1.65662	0.0311882	0	0	0	0	0
WBGene00020035	R12E2.10	chrI:4168988-4171591	0.204714	29.3814	7.16515	2.08189e-11	0	0	0	yes	0
WBGene00020087	R119.1	chrI:357238-363904	0.188873	4.72373	4.64444	3.48393e-05	0	0	0	yes	0
WBGene00020091	R119.7	chrI:364521-371636	1.73073	29.0184	4.06752	2.42087e-06	0	0	0	yes	0
WBGene00020093	R144.3	chrIII:5022010-5023164	3.21241	11.1964	1.80131	0.0499205	0	0	0	0	0
WBGene00020098	R144.10	chrIII:5001333-5002275	0.270012	15.1437	5.80955	3.04056e-05	Z2/Z3 enirhced		strictly maternal	0	yes
WBGene00020103	R148.4	chrIII:3171657-3172722	0.171947	11.7993	6.10059	4.42732e-05	0	0	0	yes	0
WBGene00020107	R151.2	chrIII:7210010-7215211	5.25688	29.3484	2.481	0.015642	0	0	0	0	0
WBGene00020110	R151.7	chrIII:7223183-7226647	2.98186	17.3149	2.53773	0.0100686	0	0	0	yes	0
WBGene00020167	T02G5.11	chrII:7078724-7081881	0.70692	64.3288	6.50777	2.22965e-07	0	0	0	yes	0
WBGene00020168	T02G5.12	chrII:7096317-7098551	0.862608	12.5083	3.85804	7.56273e-06	Z2/Z3 enirhced	intrinsic	strictly maternal	yes	yes
WBGene00020199	T03G11.6	chrX:5177495-5179166	5.02781	21.7781	2.11487	0.0102091	0	0	0	0	0
WBGene00020259	T05E7.3	chrI:6188160-6194898	2.02374	5.90098	1.54393	0.0482864	0	0	0	yes	yes
WBGene00020275	T05H4.12	chrV:6426175-6427097	23.7119	81.1647	1.77524	0.0186311	0	0	0	0	0
WBGene00020349	T08B2.11	chrI:6221246-6223117	0.0731542	1.85903	4.66747	0.00495584	0	0	0	0	0
WBGene00020375	T09B4.1	chrI:6185463-6188060	2.56612	11.0621	2.10796	0.00605622	Z2/Z3 enirhced	oogenesis-enriched	strictly maternal	yes	0
WBGene00020376	T09B4.2	chrI:6184080-6185308	3.14879	13.7288	2.12434	0.0109854	Z2/Z3 enirhced	oogenesis-enriched	na	yes	0
WBGene00020398	T10B11.2	chrI:6931136-6936917	1.38835	7.19477	2.37358	0.00432674	0	0	0	0	0
WBGene00020402	T10B11.6	chrI:6943176-6945357	1.91167	7.99688	2.0646	0.0198395	0	0	0	0	0
WBGene00020403	T10B11.7	chrI:6946062-6950457	1.96533	8.62946	2.1345	0.0152618	0	0	0	0	0
WBGene00020411	T10E9.1	chrI:6545110-6546496	1.56397	10.1372	2.69638	0.00232612	0	0	0	yes	0
WBGene00020433	T11F8.1	chrIV:5479583-5480569	0.107958	4.47258	5.37256	0.00117685	0	0	0	yes	yes
WBGene00020461	T12C9.7	chrII:4458268-4460402	0.0212947	12.2079	9.1631	0.000287975	Z2/Z3 enirhced		strictly maternal	0	0
WBGene00020463	T12E12.2	chrIV:5544850-5548440	4.31795	14.0088	1.69792	0.0238961	0	0	0	yes	0
WBGene00020498	T14B4.1	chrII:6736866-6741438	1.32244	9.60078	2.85994	0.000167827	0	0	0	yes	0
WBGene00020588	T19H12.2	chrV:4890414-4891408	28.333	161.382	2.50992	0.00300013	0	0	0	yes	0
WBGene00020600	T20B12.1	chrIII:7386163-7391071	1.76008	5.67075	1.6879	0.0385619	0	0	0	yes	0
WBGene00020612	T20D4.6	chrV:3410516-3412834	0.0110482	0.973395	6.46114	0.0343025	Z2/Z3 enirhced		na	0	0
WBGene00020627	T20F5.5	chrI:3918438-3919176	0.894188	11.1365	3.63858	0.00123384	0	0	0	0	0
WBGene00020629	T20F5.7	chrI:3925839-3927890	37.4121	117.199	1.64738	0.0408813	0	0	0	yes	0
WBGene00020652	T21E3.1	chrI:3932212-3934793	0.346757	29.4966	6.41048	3.87314e-11	Z2/Z3 enirhced	oogenesis-enriched	na	yes	0
WBGene00020679	T22B11.5	chrIV:4696908-4704003	8.52224	54.1072	2.66652	0.000771079	0	0	0	0	0
WBGene00020684	T22D1.5	chrIV:6903941-6905534	0.0967819	4.74166	5.61451	5.83663e-05	Z2/Z3 enirhced	intrinsic	strictly maternal	yes	yes
WBGene00020721	T23B12.6	chrV:8457595-8460398	2.4116	11.9952	2.3144	0.0028352	0	0	0	0	0
WBGene00020729	T23E1.2	chrIV:3141761-3146745	0.92136	4.62911	2.3289	0.0138651	0	0	0	yes	0
WBGene00020782	T24H7.3	chrII:6246325-6247188	1.44019	8.14442	2.49956	0.0151776	0	0	0	0	0
WBGene00020819	T26A5.2	chrIII:6467329-6471576	0.282971	25.2047	6.4769	1.62155e-06	Z2/Z3 enirhced	intrinsic	na	yes	0
WBGene00020823	T26A5.8	chrIII:6462172-6462795	5.37355	38.9865	2.85903	0.000876973	0	0	0	0	0
WBGene00020824	T26A8.1	chrIV:8433024-8437966	3.31112	16.182	2.289	0.00290942	0	0	0	0	0
WBGene00020831	T26C12.1	chrIV:3258904-3263486	4.5968	18.1559	1.98173	0.00849044	0	0	0	0	0
WBGene00020842	T27A3.6	chrI:6105864-6107717	0.694002	6.75437	3.28281	0.00109728	0	0	0	0	0
WBGene00020843	T27A3.7	chrI:6107834-6109657	2.82524	12.3059	2.12291	0.00872213	0	0	0	yes	0
WBGene00020896	T28D9.4	chrII:6474370-6482011	0.165362	15.3828	6.53955	0.0017372	0	0	0	0	0
WBGene00020909	W01A11.1	chrV:6499206-6504164	0.581848	35.4696	5.9298	2.22965e-07	0	0	0	0	0
WBGene00020910	W01A11.2	chrV:6497092-6498469	0.131527	9.98382	6.24616	3.25698e-05	0	0	0	yes	0
WBGene00020951	W02F12.6	chrV:6709562-6710579	8.7415	31.7481	1.86072	0.0170226	0	0	0	yes	0
WBGene00020955	W02G9.5	chrV:2658030-2660775	4.0783	23.6812	2.5377	0.00275904	Z2/Z3 enirhced		na	0	0
WBGene00020964	W03A3.2	chrIII:5791125-5802997	0.908652	8.20699	3.17505	0.000118027	0	0	0	yes	0
WBGene00020994	W03F8.4	chrIV:5184114-5185224	23.1705	99.9468	2.10887	0.0118706	0	0	0	0	0
WBGene00021014	W03G9.2	chrI:4962452-4964239	0.279308	7.85171	4.81308	1.1118e-05	Z2/Z3 enirhced	intrinsic	strictly maternal	yes	yes
WBGene00021015	W03G9.3	chrI:4959398-4961520	0.614573	4.79892	2.96505	0.0019277	0	0	0	yes	0
WBGene00021021	W04B5.4	chrIII:2406304-2410965	6.62417	21.5785	1.70378	0.0396519	0	0	0	0	0
WBGene00021024	W04C9.2	chrI:488618-489908	29.147	91.7021	1.65361	0.0340975	0	0	0	0	0
WBGene00021034	W05F2.2	chrI:3363821-3365859	0.171775	1.21946	2.82765	0.0472249	0	0	0	yes	0
WBGene00021035	W05F2.3	chrI:3367651-3368554	0.0693173	42.919	9.27419	1.66216e-06	Z2/Z3 enirhced	oogenesis-enriched	strictly maternal	yes	yes
WBGene00021037	W05F2.5	chrI:3371770-3373834	0.00764871	5.51937	9.49507	0.00799052	0	0	0	0	yes
WBGene00021038	W05F2.6	chrI:3368815-3371444	0.0112835	17.2016	10.5741	0.000181001	Z2/Z3 enirhced	intrinsic	strictly maternal	yes	0
WBGene00021055	W06A11.4	chrII:4055941-4057656	1.86996	13.3267	2.83324	0.000985959	0	0	0	0	0
WBGene00021056	W06B4.1	chrII:4471400-4473552	0.335304	6.24414	4.21896	0.000224008	Z2/Z3 enirhced	oogenesis-enriched	strictly maternal	yes	0
WBGene00021057	W06B4.2	chrII:4468169-4471034	2.35913	8.64982	1.87442	0.0209024	0	0	0	0	0
WBGene00021058	W06B4.3	chrII:4461429-4467895	3.12052	11.0335	1.82203	0.0170386	0	0	0	0	0
WBGene00021076	W07E6.5	chrII:476554-477795	0.400915	2.79842	2.80324	0.0434374	0	0	0	0	0
WBGene00021107	W09B7.2	chrV:8870236-8871981	0.0477122	1.45903	4.93451	0.0232951	0	0	0	0	0
WBGene00021123	W09G12.9	chrIV:1216626-1218270	1.72072	14.8574	3.1101	0.00834381	0	0	0	0	0
WBGene00021153	Y4C6A.3	chrIV:5450984-5452417	0.0358167	16.6321	8.85913	2.99334e-05	Z2/Z3 enirhced		strictly maternal	yes	yes
WBGene00021192	Y14H12B.2	chrII:3932179-3933742	0.0897684	12.5965	7.1326	1.92282e-06	Z2/Z3 enirhced	intrinsic	strictly maternal	yes	yes
WBGene00021200	Y17G9B.3	chrIV:4761051-4762779	0.735854	18.965	4.68778	1.70331e-07	Z2/Z3 enirhced		strictly maternal	0	0
WBGene00021202	Y17G9B.5	chrIV:4750231-4751483	6.17315	18.5529	1.58757	0.0436875	0	0	0	0	0
WBGene00021206	Y17G9B.9	chrIV:4758975-4760420	0.0833727	7.78323	6.54465	5.15805e-06	Z2/Z3 enirhced	oogenesis-enriched	strictly maternal	yes	yes
WBGene00021211	Y18H1A.7	chrI:717941-719730	0.284446	18.0018	5.98384	3.64412e-08	Z2/Z3 enirhced	intrinsic	na	yes	yes
WBGene00021227	Y19D10A.12	chrV:2483002-2487784	0.162274	6.43404	5.30922	8.17828e-05	0	0	0	0	0
WBGene00021238	Y20F4.3	chrI:1988725-2010482	4.49403	19.988	2.15306	0.00370189	0	0	0	0	0
WBGene00021246	Y22D7AL.7	chrIII:1576747-1580786	1.28486	7.09033	2.46425	0.00685911	0	0	0	0	0
WBGene00021305	Y32G9A.8	chrV:1875537-1882239	4.00928	13.2879	1.7287	0.0313234	0	0	0	0	yes
WBGene00021315	Y32H12A.7	chrIII:5382262-5385368	1.83965	13.9525	2.92302	0.000485778	0	0	0	0	0
WBGene00021327	Y34D9A.1	chrI:1019886-1029913	3.20708	13.2323	2.04473	0.0150341	0	0	0	0	0
WBGene00021329	Y34D9A.3	chrI:1034474-1040871	1.92638	7.75187	2.00865	0.012632	0	0	0	0	0
WBGene00021340	Y34F4.5	chrIII:1026904-1028404	0.372762	5.95677	3.9982	0.00306597	0	0	0	0	0
WBGene00021355	Y37E3.17	chrI:2128592-2145974	3.87567	27.9272	2.84915	0.000443232	0	0	0	0	0
WBGene00021365	Y37E11AM.1	chrIV:3726414-3735484	6.13088	22.6339	1.88432	0.0170176	0	0	0	yes	0
WBGene00021378	Y37E11B.6	chrIV:3598652-3599234	2.41402	11.3441	2.23243	0.0457282	0	0	0	0	0
WBGene00021395	Y38C1AA.3	chrIV:184649-192149	1.31616	8.56825	2.70267	0.00991219	0	0	0	0	0
WBGene00021425	Y38F2AR.7	chrIV:2333836-2348912	1.33524	4.39734	1.71954	0.0424425	0	0	0	0	0
WBGene00021440	Y39A3CL.1	chrIII:1834503-1846749	0.705815	25.9057	5.19784	7.86582e-10	0	0	0	0	0
WBGene00021456	Y39F10B.1	chrII:723794-732425	6.2136	29.445	2.24452	0.0125123	0	0	0	0	0
WBGene00021465	Y39G10AR.7	chrI:2316308-2318287	0.0854424	4.83492	5.8224	1.1521e-05	Z2/Z3 enirhced		strictly maternal	0	yes
WBGene00021486	Y40B10A.1	chrV:2068447-2069142	11.3215	59.8403	2.40205	0.00276476	Z2/Z3 enirhced		na	0	0
WBGene00021507	Y41D4A.5	chrIV:1728049-1737883	6.35205	19.3353	1.60594	0.0332986	0	0	0	0	0
WBGene00021515	Y41D4B.12	chrIV:1602983-1605560	0.96708	11.6716	3.59323	0.0119208	0	0	0	0	0
WBGene00021535	Y42G9A.6	chrIII:6142070-6149538	0.205918	6.23544	4.92035	0.000109083	Z2/Z3 enirhced	mixed_oogenesis-somatic	na	0	0
WBGene00021538	Y42H9AR.3	chrIV:8104340-8107584	0.913038	4.40823	2.27145	0.0125797	0	0	0	0	0
WBGene00021541	Y42H9B.3	chrIV:8011017-8012417	4.02185	17.4354	2.11609	0.00818211	0	0	0	0	0
WBGene00021544	Y43B11AR.3	chrIV:7082264-7083603	0.98999	6.09783	2.62281	0.00853545	Z2/Z3 enirhced		na	0	0
WBGene00021548	Y44E3A.3	chrI:3317977-3318586	2.94613	17.8699	2.60064	0.0166876	0	0	0	0	0
WBGene00021555	Y45G5AM.2	chrV:4175872-4191501	0.213052	8.59476	5.33418	0.0416472	Z2/Z3 enirhced		na	0	0
WBGene00021560	Y45G5AM.8	chrV:4170105-4175611	0.225447	8.86749	5.29766	1.41217e-06	0	0	0	0	0
WBGene00021596	Y46E12BL.3	chrII:15230285-15232722	0.569006	22.2834	5.29138	7.35043e-07	0	0	0	0	yes
WBGene00021606	Y46H3C.6	chrV:1697890-1699717	0.00611878	1.69574	8.11445	0.0267849	0	0	0	0	0
WBGene00021613	Y47A7.1	chrV:5204464-5213405	1.96096	6.17923	1.65587	0.0322836	0	0	0	0	0
WBGene00021638	Y47G6A.9	chrI:3479330-3481376	1.47371	7.35574	2.31942	0.0269079	0	0	0	0	0
WBGene00021647	Y47G6A.22	chrI:3559931-3562854	1.54692	7.34956	2.24826	0.0226459	0	0	0	0	0
WBGene00021649	Y47G6A.25	chrI:3606413-3608348	0.107332	17.112	7.31679	3.29073e-08	Z2/Z3 enirhced	oogenesis-enriched	strictly maternal	yes	yes
WBGene00021654	Y47G7B.2	chrII:2706000-2707987	0.0418478	1.70969	5.35244	0.0152618	0	0	0	0	0
WBGene00021655	Y48A5A.1	chrIV:1965480-1969624	0.659762	9.75598	3.88627	3.83823e-05	0	0	0	0	0
WBGene00021657	Y48G1A.1	chrI:348537-357136	0.198072	2.75363	3.79724	0.000237941	0	0	0	0	0
WBGene00021658	Y48G1A.2	chrI:343117-348367	0.236543	140.333	9.21254	3.04056e-05	0	0	0	0	0
WBGene00021664	Y48G1BL.5	chrI:219734-220560	0.210399	4.61807	4.45609	0.0178784	0	0	0	0	0
WBGene00021667	Y48G1BM.1	chrI:252117-254129	0.151551	3.29411	4.44201	0.000865864	0	0	0	0	0
WBGene00021673	Y48G1BM.8	chrI:248623-251580	0.0608604	6.42687	6.72247	0.00033618	0	0	0	0	0
WBGene00021676	Y48G1C.1	chrI:93030-94881	0.823836	9.82437	3.57594	7.88983e-05	Z2/Z3 enirhced	intrinsic	na	yes	0
WBGene00021677	Y48G1C.4	chrI:49918-54360	0.904108	6.48268	2.84202	0.00281816	0	0	0	0	0
WBGene00021685	Y48G8AL.1	chrI:1211494-1254667	1.77305	13.7467	2.95478	0.000188689	0	0	0	0	0
WBGene00021687	Y48G8AL.7	chrI:1157571-1162878	2.01333	9.79003	2.28173	0.0206841	0	0	0	yes	yes
WBGene00021692	Y48G8AL.15	chrI:1254771-1258229	0.785401	5.34147	2.76574	0.0323576	0	0	0	0	0
WBGene00021704	Y48G9A.11	chrIII:2112403-2116887	0.0418089	2.42969	5.86082	0.00683324	Z2/Z3 enirhced	intrinsic	na	yes	0
WBGene00021713	Y49F6A.5	chrII:3607939-3609864	0.0216236	2.82463	7.02931	0.00891586	0	0	0	0	0
WBGene00021732	Y49G5B.1	chrV:5226989-5229671	0	3.79811	1.79769e+308	0.0238221	0	0	0	0	0
WBGene00021735	Y50D4A.1	chrV:1207889-1219847	4.22434	15.0028	1.82844	0.035632	0	0	0	0	0
WBGene00021748	Y50D4C.3	chrV:939498-945245	1.37416	8.01518	2.54418	0.00178988	0	0	0	0	yes
WBGene00021750	Y50D4C.6	chrV:947092-949850	1.45427	8.43641	2.53633	0.0286949	0	0	0	0	0
WBGene00021752	Y50D7A.2	chrIII:268456-282872	1.77395	5.65392	1.67229	0.0466559	0	0	0	0	0
WBGene00021759	Y50D7A.11	chrIII:265095-266592	5.03341	17.3361	1.78417	0.0458938	0	0	0	0	0
WBGene00021763	Y51F10.2	chrI:1978006-1983416	6.22355	438.384	6.13831	5.75065e-10	0	0	0	0	0
WBGene00021765	Y51F10.4	chrI:1932353-1945209	0.909706	5.86978	2.68983	0.0260644	0	0	0	0	0
WBGene00021766	Y51F10.5	chrI:1924301-1932262	1.89808	9.08006	2.25816	0.00530877	0	0	0	0	0
WBGene00021795	Y52E8A.2	chrII:4320851-4321555	0.102365	3.72073	5.18379	0.0275871	Z2/Z3 enirhced		na	0	0
WBGene00021831	Y54E10A.11	chrI:3176423-3192732	2.40608	10.8752	2.17628	0.00420227	0	0	0	0	0
WBGene00021832	Y54E10A.12	chrI:3193534-3198833	0.10169	6.90759	6.08593	1.5356e-05	0	0	0	yes	0
WBGene00021849	Y54F10AM.5	chrIII:2529052-2530493	20.7588	59.5814	1.52114	0.0465618	0	0	0	0	0
WBGene00021854	Y54F10AR.1	chrIII:2573216-2575231	11.1728	49.5859	2.14994	0.00555172	0	0	0	0	0
WBGene00021855	Y54F10AR.2	chrIII:2567458-2571538	2.36831	14.5358	2.61768	0.00318271	0	0	0	0	0
WBGene00021877	Y54G2A.12	chrIV:2777252-2782822	0.542101	8.17631	3.91482	0.000774889	0	0	0	0	0
WBGene00021887	Y54G2A.22	chrIV:2919860-2922227	0.048411	7.08615	7.19352	0.000248997	Z2/Z3 enirhced		strictly maternal	0	yes
WBGene00021891	Y54G2A.27	chrIV:2998874-3000754	0.12667	3.6736	4.85805	0.00405506	0	0	0	0	0
WBGene00021892	Y54G2A.28	chrIV:3002504-3011197	0.0344816	8.40836	7.92986	7.22759e-05	0	0	0	0	0
WBGene00021902	Y54H5A.4	chrIII:5155464-5158736	0.861802	6.89878	3.00091	0.00118424	0	0	0	0	0
WBGene00021910	Y55B1BM.1	chrIII:408126-418737	4.08544	13.8502	1.76135	0.0381942	0	0	0	0	0
WBGene00021923	Y55F3AM.5	chrIV:999229-1003498	3.09358	13.3709	2.11175	0.0148052	0	0	0	0	0
WBGene00021926	Y55F3AM.9	chrIV:1006090-1009717	1.6204	11.3907	2.81344	0.000812531	0	0	0	0	0
WBGene00021931	Y55F3AM.14	chrIV:1058844-1063178	0.203535	2.2843	3.48841	0.00961399	0	0	0	0	0
WBGene00021938	Y55F3BR.1	chrIV:874911-881909	0.845863	5.5837	2.72273	0.00155368	0	0	0	0	0
WBGene00021942	Y55F3BR.5	chrIV:830390-831896	0.0105226	3.3297	8.30575	0.0230393	0	0	0	0	0
WBGene00021943	Y55F3BR.6	chrIV:835047-838536	0.190324	1.68691	3.14785	0.0428938	0	0	0	0	0
WBGene00021959	Y57E12AL.6	chrV:7059713-7060452	20.0378	65.6228	1.71148	0.031532	Z2/Z3 enirhced		strictly maternal	yes	0
WBGene00022034	Y65B4BL.2	chrI:506479-510840	0.311284	75.4985	7.92207	0	Z2/Z3 enirhced	oogenesis-enriched	strictly maternal	yes	0
WBGene00022035	Y65B4BL.3	chrI:496207-502046	0	4.86612	1.79769e+308	0.0129123	Z2/Z3 enirhced		strictly maternal	0	yes
WBGene00022036	Y65B4BL.4	chrI:502957-506253	0.0124383	18.1909	10.5142	2.70136e-05	Z2/Z3 enirhced		strictly maternal	0	yes
WBGene00022053	Y67D2.3	chrIII:1540497-1543412	21.6179	90.2024	2.06094	0.00685096	0	0	0	0	0
WBGene00022055	Y67D2.5	chrIII:1538501-1540191	1.50057	9.5796	2.67446	0.0146737	Z2/Z3 enirhced		na	0	0
WBGene00022056	Y67D2.6	chrIII:1544929-1554433	0.802872	3.52646	2.13498	0.0182154	0	0	0	0	0
WBGene00022067	Y67D8C.3	chrIV:3055711-3062031	2.03481	6.85682	1.75264	0.0464655	0	0	0	0	0
WBGene00022077	Y69A2AR.6	chrIV:2608058-2610198	2.82329	9.93269	1.8148	0.0404608	0	0	0	0	0
WBGene00022087	Y69A2AR.16	chrIV:2504325-2530287	4.7141	16.9484	1.8461	0.0130144	0	0	0	0	0
WBGene00022101	Y69A2AR.32	chrIV:2610419-2612428	5.4768	19.9258	1.86323	0.0409802	0	0	0	0	0
WBGene00022113	Y71F9AL.8	chrI:2878579-2880865	0.315827	13.4064	5.40765	6.36005e-06	0	0	0	yes	0
WBGene00022124	Y71F9AR.3	chrI:2986188-2995915	3.78737	11.4705	1.59866	0.0443169	0	0	0	0	0
WBGene00022172	Y71H2AM.7	chrIII:2726075-2734003	0.182494	6.61013	5.17876	0.000124936	0	0	0	0	0
WBGene00022174	Y71H2AM.9	chrIII:2690155-2698809	0.490489	2.24882	2.19687	0.0334638	0	0	0	0	0
WBGene00022192	Y71H2B.2	chrIII:2623160-2627727	5.08033	17.0382	1.74578	0.0286269	0	0	0	yes	0
WBGene00022193	Y71H2B.3	chrIII:2619926-2623039	2.30989	8.42526	1.8669	0.0235845	0	0	0	0	0
WBGene00022195	Y71H2B.5	chrIII:2608009-2618847	0.650916	4.03219	2.63102	0.00198428	0	0	0	0	0
WBGene00022198	Y71H2B.11	chrIII:2605220-2606491	0.221432	5.21758	4.55844	0.00143165	0	0	0	0	0
WBGene00022203	Y73B3A.1	chrX:42874-47060	8.0111	32.1227	2.00352	0.0161941	0	0	0	0	0
WBGene00022205	Y73B3A.3	chrX:84042-93664	0.593777	3.19485	2.42776	0.0101822	0	0	0	0	0
WBGene00022211	Y73B3A.9	chrX:150364-154445	3.04955	14.3916	2.23856	0.0075959	0	0	0	0	0
WBGene00022212	Y73B3A.10	chrX:154782-157360	2.96517	12.9649	2.12842	0.0192548	0	0	0	0	0
WBGene00022218	Y73B3A.16	chrX:78428-80400	0.104876	2.34054	4.48008	0.0136219	0	0	0	0	0
WBGene00022224	Y73B3B.2	chrX:214696-215575	0	2.62942	1.79769e+308	0.0335902	0	0	0	0	0
WBGene00022233	Y73B6BL.4	chrIV:6337641-6340085	1.68072	10.3285	2.61949	0.00108802	0	0	0	0	0
WBGene00022244	Y73B6BL.23	chrIV:6418191-6419067	1.1682	266.363	7.83296	2.03144e-11	Z2/Z3 enirhced		na	0	0
WBGene00022257	Y73B6BL.38	chrIV:6421592-6423485	0.278841	32.5844	6.86859	1.3766e-10	Z2/Z3 enirhced		na	0	0
WBGene00022292	Y75D11A.3	chrX:1745262-1746212	0	3.94301	1.79769e+308	0.0376972	0	0	0	yes	yes
WBGene00022296	Y76B12C.2	chrIV:1993090-2008993	5.08533	27.8214	2.45178	0.00124065	0	0	0	yes	0
WBGene00022300	Y76B12C.6	chrIV:1986275-1991720	4.25865	14.8745	1.80437	0.0235081	0	0	0	yes	0
WBGene00022335	Y82E9BR.2	chrIII:1439087-1443182	1.42599	9.57161	2.7468	0.000824149	0	0	0	yes	yes
WBGene00022336	Y82E9BR.3	chrIII:1419185-1419785	52.2705	177.086	1.76038	0.0238025	0	0	0	0	0
WBGene00022350	Y82E9BR.18	chrIII:1467865-1483499	0.621615	4.66183	2.9068	0.000635374	0	0	0	0	0
WBGene00022351	Y82E9BR.19	chrIII:1484962-1495322	1.57001	25.7313	4.03468	1.14253e-06	0	0	0	0	0
WBGene00022372	Y92H12BR.7	chrI:1394570-1402944	4.22925	13.2917	1.65205	0.0343552	0	0	0	0	0
WBGene00022380	Y94H6A.8	chrIV:2716658-2719834	11.1373	39.3436	1.82072	0.0219965	0	0	0	0	0
WBGene00022390	Y95B8A.11	chrI:889934-895102	0.0654365	2.0849	4.99374	0.00494098	Z2/Z3 enirhced		strictly maternal	0	yes
WBGene00022420	Y102E9.2	chrIII:6725733-6728003	4.90833	28.1875	2.52175	0.00905052	Z2/Z3 enirhced	oogenesis-enriched	strictly maternal	yes	0
WBGene00022447	Y110A2AL.12	chrII:2878958-2884900	4.17174	16.7748	2.00757	0.0362171	0	0	0	0	0
WBGene00022452	Y110A2AR.1	chrII:2919718-2920825	0.623663	6.41929	3.36358	0.00179541	0	0	0	yes	0
WBGene00022508	ZC53.1	chrX:1911394-1913250	0.0438336	3.42651	6.28856	0.00099321	0	0	0	0	yes
WBGene00022531	ZC155.3	chrIII:5203673-5206872	4.85485	18.7051	1.94593	0.0112515	0	0	0	yes	0
WBGene00022532	ZC155.4	chrIII:5211967-5214966	0.0795438	2.23959	4.81534	0.00242489	Z2/Z3 enirhced	oogenesis-enriched	strictly maternal	yes	yes
WBGene00022590	ZC317.7	chrV:5468668-5470981	0.00991698	2.33562	7.87969	0.000858167	0	0	0	yes	yes
WBGene00022598	ZC395.8	chrIII:5268642-5273432	7.66841	22.7468	1.56866	0.048901	0	0	0	yes	0
WBGene00022620	ZC477.5	chrIV:7101424-7103250	2.95375	9.47129	1.68101	0.0490778	0	0	0	yes	0
WBGene00022673	ZK177.8	chrII:5509016-5513731	1.15914	17.2174	3.89274	0.000104121	0	0	0	0	0
WBGene00022702	ZK353.7	chrIII:8402030-8403535	3.66929	13.5093	1.88038	0.0241694	0	0	0	yes	0
WBGene00022719	ZK370.5	chrIII:8737603-8741333	1.84833	7.43302	2.00772	0.0210112	Z2/Z3 enirhced		strictly maternal	0	0
WBGene00022721	ZK370.7	chrIII:8746140-8748621	0.73427	5.41222	2.88184	0.00418226	0	0	0	0	0
WBGene00022722	ZK370.8	chrIII:8749690-8761009	2.64364	17.9426	2.76279	0.0118626	0	0	0	0	0
WBGene00022731	ZK402.5	chrX:1398818-1400746	0.219169	1.46205	2.73787	0.0337248	0	0	0	0	0
WBGene00022737	ZK418.8	chrIII:7083622-7084999	0.183381	2.62842	3.84128	0.00884121	Z2/Z3 enirhced	intrinsic	strictly maternal	yes	yes
WBGene00022775	ZK616.5	chrIV:5392163-5393034	0.810303	123.816	7.25552	1.4535e-08	Z2/Z3 enirhced		na	0	0
WBGene00022787	ZK652.10	chrIII:7855772-7857175	0.823225	7.55842	3.19873	0.0019277	0	0	0	0	0
WBGene00022830	ZK973.1	chrI:4382565-4385219	1.47644	38.085	4.68903	8.74845e-09	Z2/Z3 enirhced		na	0	0
WBGene00022862	ZK1236.1	chrIII:8429263-8431474	0.282413	2.78105	3.29975	0.00194283	0	0	0	0	0
WBGene00022865	ZK1236.7	chrIII:8439393-8443535	3.92408	15.881	2.01688	0.0121174	0	0	0	0	0
WBGene00022877	ZK1248.7	chrII:5812476-5813708	0.0356128	0.884664	4.63466	0.0226753	0	0	0	yes	0
WBGene00022880	ZK1248.10	chrII:5820690-5827422	3.0659	15.4272	2.3311	0.031098	0	0	0	yes	0
WBGene00022883	ZK1248.15	chrII:5836755-5838532	3.13867	15.0327	2.25987	0.00508908	0	0	0	yes	0
WBGene00023421	B0564.11	chrIV:13105312-13106889	4.30989	22.9693	2.41398	0.00225373	Z2/Z3 enirhced	intrinsic	strictly maternal	0	0
WBGene00023427	F14D2.15	chrII:3342395-3343540	0	14.9141	1.79769e+308	0.00863232	Z2/Z3 enirhced		na	0	yes
WBGene00043051	C29E4.13	chrIII:7926935-7928669	1.96913	10.0502	2.3516	0.0274194	0	0	0	0	0
WBGene00043705	Y55F3AM.7	chrIV:988160-990439	0.392363	6.08925	3.956	0.00342799	0	0	0	0	0
WBGene00044008	C45G3.5	chrI:9226935-9228046	1.68451	6.97177	2.04919	0.0317542	0	0	0	0	0
WBGene00044065	W09G3.3	chrI:13802480-13806778	2.02714	9.9637	2.29724	0.0234245	0	0	0	0	0
WBGene00044067	T28F3.3	chrIV:17285964-17287415	0.833006	20.8557	4.64597	1.31899e-05	Z2/Z3 enirhced	intrinsic	strictly maternal	yes	0
WBGene00044258	Y57G11C.51	chrIV:14773569-14774533	0.710624	6.36103	3.1621	0.0103275	0	0	0	0	yes
WBGene00044305	F56H1.6	chrI:5744186-5745522	1.3088	6.966	2.41209	0.0114895	0	0	0	0	0
WBGene00044310	H20J04.9	chrII:4351201-4353154	0.215976	4.02496	4.22003	0.00295239	Z2/Z3 enirhced		na	0	0
WBGene00044325	C33H5.19	chrIV:7782593-7783841	3.44372	19.6491	2.51242	0.00299694	0	0	0	0	0
WBGene00044423	F53F10.8	chrI:3828252-3828685	2.53938	27.5659	3.44034	0.00178205	Z2/Z3 enirhced		na	0	0
WBGene00044608	C07G1.8	chrIV:8200675-8201214	4.40306	21.6108	2.29518	0.0273366	0	0	0	0	0
WBGene00044638	F23A7.8	chrX:16213300-16213516	7.69895	152.451	4.30754	0.000221567	0	0	0	0	0
WBGene00044758	Y37H2A.12	chrV:18129261-18131081	0	2.28034	1.79769e+308	0.0444199	0	0	0	0	yes
WBGene00044924	M106.7	chrII:10855671-10857117	3.78674	21.9486	2.5351	0.0165416	0	0	0	0	0
WBGene00044987	K07A1.17	chrI:9581872-9582571	0.16428	12.7078	6.27342	0.00085255	Z2/Z3 enirhced	oogenesis-enriched	strictly maternal	0	0
WBGene00045237	F39H2.5	chrI:8660813-8664137	0.081459	4.1984	5.68762	0.0206841	0	0	0	0	0
WBGene00045297	C16A11.9	chrII:4234952-4235985	0	3.47113	1.79769e+308	0.0252497	0	0	0	0	0
WBGene00045483	F56H1.7	chrI:5760899-5762438	1.48664	9.06634	2.60846	0.011898	0	0	0	0	0
WBGene00077500	C27H6.9	chrV:9982855-9983861	0.337532	6.80526	4.33355	0.000567938	0	0	0	0	0
WBGene00077585	T01G5.8	chrV:15116250-15116578	6.95314	46.3746	2.7376	0.0185724	0	0	0	0	0
WBGene00077762	Y57G11C.499	chrIV:14754056-14754902	0	2.71284	1.79769e+308	0.0331848	Z2/Z3 enirhced		na	0	0
WBGene00086551	D2005.7	chrI:7819573-7820483	0.392799	16.3018	5.3751	2.20042e-05	Z2/Z3 enirhced		na	0	0
WBGene00086566	C08H9.16	chrII:9892729-9894279	3.78431	27.0681	2.83849	0.000475369	0	0	0	0	0
WBGene00006946	C34E10.4	chrIII:5236370-5239989	1.30942	5.14362	1.97386	0.0311715	0	0	0	0	0
WBGene00013271	Y57A10A.32	chrII:12299547-12300009	5.74682	42.3021	2.87989	0.0012534	0	0	0	0	0
WBGene00013444	Y66D12A.18	chrIII:11510469-11511330	0.317459	3.81791	3.58814	0.0092878	0	0	0	0	0
WBGene00022049	Y66H1B.3	chrIV:370292-376064	1.6372	7.74246	2.24156	0.00300013	0	0	0	0	0
WBGene00022050	Y66H1B.5	chrIV:367122-369032	2.25166	17.0349	2.91943	0.000365766	0	0	0	0	0
WBGene00014212	ZK1067.8	chrII:9213641-9214360	6.10742	149.642	4.61481	8.74845e-09	Z2/Z3 enirhced		na	0	0
