# Supplementary material for: Nanos promotes epigenetic reprograming of the germline by down-regulation of the THAP transcription factor LIN-15B
Source: eLife. 2017 Nov 7;6:e30201. doi: 10.7554/eLife.30201 (PMC5734877; doi:10.7554/eLife.30201)
Supplement: Supplementary file 9. — Sheet 1. A table contains HTseq-count output using all Truseq libraries. Sheet 2. A table contains HTseq-count output using SMART-seq libraries. [file elife-30201-supp9.xlsx]

## Sheet: INFORMATION
Supplemental table S11. Gene counts information for PCA
counttalbe_L1 contains HTseq-count output using Truseq libraries.
counttable_smartseq contains Htseq-count output using smartseq libraries.

## Sheet: counttable_L1
	mes-2_FedL1_Slee40.genecount	mes-2_FedL1_Slee41.genecount	mes-4_FedL1_Slee42.genecount	mes-4_FedL1_Slee43.genecount	nos-1/2_FedL1_Slee38.genecount	nos-1/2_FedL1_Slee39.genecount	nos-1/2_L1_Slee51.genecount	nos-1/2_L1_Slee57.genecount	nos-1/2;lin-15B_L1_Slee52.genecount	nos-1/2;lin-15B_L1_Slee53.genecount	WT_FedL1_Slee35.genecount	WT_FedL1_Slee36.genecount	WT_FedL1_Slee37.genecount	WT_L1_Slee32.genecount	WT_L1_Slee33.genecount	WT_L1_Slee34.genecount	WT_L1_Slee50.genecount
21ur-100	0	0	0	0	0	0	0	0	0	0	0	0	1	0	0	0	0
21ur-1000	0	0	0	1	0	0	0	0	0	0	0	0	0	0	0	0	0
21ur-10000	1	0	0	0	0	0	1	0	0	0	0	0	0	0	0	0	0
21ur-1001	0	0	0	0	0	0	0	0	1	1	0	0	1	0	1	0	0
21ur-10011	0	1	0	0	0	0	0	0	0	0	0	0	0	0	0	0	0
21ur-10019	0	0	0	0	0	0	3	0	1	7	0	0	0	0	0	0	0
21ur-10024	0	0	0	0	0	0	0	0	0	2	0	0	0	0	0	0	0
21ur-10029	0	0	0	0	0	0	0	0	0	1	0	0	0	0	0	0	0
21ur-10030	0	0	0	0	0	0	0	0	0	0	0	0	1	0	0	0	0
21ur-10037	0	0	1	1	1	1	0	0	0	0	0	0	0	0	0	0	0
21ur-1004	0	0	0	0	0	0	0	0	0	0	0	0	1	0	0	0	2
21ur-10048	0	0	0	0	0	0	0	0	1	1	0	0	0	0	0	0	0
21ur-1005	0	0	1	0	0	0	0	0	0	0	0	0	0	0	0	0	0
21ur-10052	0	0	0	0	0	0	0	0	0	3	0	0	0	0	0	0	0
21ur-10054	0	1	0	0	0	0	0	0	0	0	0	2	1	1	0	0	0
21ur-1006	0	0	0	0	0	0	0	0	0	0	0	0	0	0	0	0	1
21ur-10061	1	0	0	0	0	0	1	0	0	1	0	0	0	0	0	0	0
21ur-10076	0	0	0	0	0	0	0	0	0	1	0	0	0	0	0	0	0
21ur-10077	0	0	0	0	0	0	0	1	0	0	0	0	0	0	0	0	1
21ur-10078	0	0	0	0	0	0	0	0	1	0	0	0	0	0	0	0	0
21ur-10079	0	0	1	0	0	0	3	1	2	0	0	1	0	0	0	0	0
21ur-10081	0	0	0	0	0	0	0	0	0	0	0	0	0	0	0	0	1
21ur-10082	1	0	2	2	0	0	0	0	0	0	0	1	0	0	1	0	0
21ur-10086	0	0	0	0	0	1	0	0	0	0	0	0	0	0	0	0	0
21ur-10103	0	0	0	0	0	0	0	0	0	0	0	0	2	0	0	0	1
21ur-10106	0	0	0	0	0	0	3	0	0	0	0	0	0	0	0	0	0
21ur-10108	0	0	0	0	0	0	0	0	0	0	0	1	0	0	0	0	1
21ur-10112	1	0	1	2	0	0	0	0	0	0	0	0	0	0	0	0	0
21ur-10115	0	0	0	0	0	0	0	0	1	0	0	0	0	0	0	0	0
21ur-10116	0	0	0	4	0	0	4	0	3	0	1	0	0	0	0	0	1
21ur-10117	0	0	0	0	0	0	1	0	0	1	0	0	0	0	0	0	0
21ur-10121	0	0	0	1	0	0	0	0	2	0	0	0	1	0	0	0	0
21ur-10122	0	0	0	0	2	0	1	0	0	0	0	0	1	0	0	0	0
21ur-10124	0	0	0	0	0	0	0	0	3	0	0	0	0	0	0	0	0
21ur-10125	0	0	1	0	0	0	0	0	0	0	0	0	0	0	0	0	0
21ur-10134	0	0	0	0	0	0	0	0	1	1	0	0	0	0	0	0	2
21ur-10135	0	0	1	0	0	0	0	0	0	0	0	0	0	0	0	0	0
21ur-10139	0	0	0	2	1	0	1	0	0	0	0	1	0	0	0	0	0
21ur-10141	0	0	0	0	0	0	0	0	0	1	0	0	0	0	0	0	0
21ur-10149	0	0	0	0	0	0	0	0	0	1	0	0	0	0	0	0	0
21ur-10150	0	0	0	0	0	0	0	0	0	0	0	0	1	0	0	0	0
21ur-10151	0	0	1	0	0	0	0	0	0	0	0	0	0	0	0	0	1
21ur-10153	1	0	0	0	5	1	6	1	2	1	0	0	1	0	0	0	0
21ur-10155	0	0	0	0	1	0	2	0	0	0	0	0	0	0	0	0	0
21ur-10156	0	0	0	0	3	0	0	0	2	0	0	0	0	0	0	0	0
21ur-10166	0	0	0	0	0	0	1	0	0	0	0	0	0	0	0	0	0
21ur-10169	0	0	0	0	0	0	0	0	0	1	0	0	0	0	0	0	0
21ur-10171	0	0	0	0	0	0	1	0	1	0	0	0	0	0	0	0	0
21ur-10172	0	0	0	0	0	0	0	0	0	0	0	0	2	0	0	0	0
21ur-10173	0	0	1	1	0	0	0	0	0	0	0	0	0	0	0	0	0
21ur-10174	1	0	0	0	0	0	0	0	0	0	0	0	0	0	0	0	1
21ur-10175	1	0	0	0	0	0	0	0	1	0	0	0	0	0	0	0	0
21ur-10176	0	0	0	0	0	0	0	1	1	3	0	0	0	1	0	0	1
21ur-10180	4	1	2	1	1	0	0	0	2	1	0	2	1	0	0	1	0
21ur-10181	0	0	0	0	1	0	0	0	1	0	0	1	0	0	0	0	0
21ur-10185	0	0	0	0	0	0	1	0	0	0	0	0	0	0	0	0	0
21ur-10186	0	0	0	0	0	0	0	0	0	0	0	0	1	0	0	0	0
21ur-10187	0	0	0	0	0	0	1	0	1	0	0	0	0	0	0	0	0
21ur-1019	0	0	0	0	0	0	1	0	0	0	0	0	0	0	0	0	0
21ur-10198	0	0	0	0	0	0	0	0	0	0	0	0	0	0	0	0	2
21ur-102	0	0	0	0	0	0	1	0	0	0	0	0	0	0	0	0	0
21ur-10201	0	0	0	0	0	0	0	0	1	0	0	0	0	0	0	0	0
21ur-10202	0	0	1	0	0	0	0	0	0	0	0	0	0	0	0	0	0
21ur-10212	1	0	1	0	0	0	0	0	0	0	1	0	0	0	0	0	0
21ur-10214	0	0	0	0	0	0	2	0	0	1	0	0	0	0	0	0	0
21ur-10216	2	0	0	0	0	0	0	0	0	0	0	0	0	0	0	0	0
21ur-10217	0	0	0	1	0	0	0	0	0	0	0	0	0	0	0	0	0
21ur-1022	2	0	1	2	0	1	1	4	4	3	0	0	0	0	0	0	1
21ur-10221	1	1	4	2	0	1	3	3	5	2	0	3	2	0	0	1	2
21ur-10223	0	0	0	0	0	0	0	0	2	0	0	0	0	0	0	0	0
21ur-1023	2	1	0	1	0	0	0	0	1	0	0	0	2	0	1	0	0
21ur-10235	0	0	0	0	0	0	0	1	0	0	0	0	0	0	0	0	0
21ur-10237	0	0	0	0	0	0	0	0	0	0	0	1	0	0	0	0	1
21ur-10238	0	0	2	0	0	0	2	0	0	0	0	0	0	0	0	0	0
21ur-10243	1	0	0	0	0	0	0	0	0	1	0	0	0	0	0	0	0
21ur-10246	0	0	0	0	0	0	0	0	0	0	0	1	1	0	0	0	0
21ur-10248	2	0	0	0	0	0	0	0	1	0	0	0	0	0	0	0	0
21ur-10249	0	0	1	0	0	0	0	0	0	0	0	0	0	0	1	0	0
21ur-10279	0	0	0	0	0	0	0	0	0	0	0	0	2	0	0	0	0
21ur-1028	0	0	0	0	0	1	0	0	0	0	0	0	1	0	0	0	0
21ur-10287	0	0	0	0	0	0	0	0	1	0	0	0	0	0	0	0	0
21ur-10289	0	1	0	0	0	3	1	1	1	1	0	1	0	0	0	0	0
21ur-10297	1	0	0	0	0	0	0	0	0	0	0	0	0	0	0	0	0
21ur-10300	0	0	0	0	0	0	1	0	0	1	0	0	1	0	0	0	0
21ur-10301	0	0	0	0	0	0	0	0	0	0	0	0	1	0	0	0	0
21ur-10303	0	0	0	0	0	0	0	0	1	0	0	0	0	0	0	0	0
21ur-10304	0	0	0	0	0	0	0	0	0	1	0	0	0	0	0	0	0
21ur-10305	0	0	0	0	0	1	0	0	0	0	0	0	0	0	0	0	0
21ur-10307	0	0	1	0	0	0	0	0	0	2	0	0	0	0	0	0	1
21ur-10310	0	0	0	0	1	0	0	0	0	0	0	0	0	0	0	0	0
21ur-10311	0	0	0	0	1	0	1	0	3	3	0	0	0	0	0	0	0
21ur-10318	0	0	0	0	0	0	1	0	0	0	0	0	0	0	0	0	0
21ur-10321	1	0	0	0	0	0	0	0	0	0	0	0	0	0	0	0	0
21ur-10328	0	0	0	0	0	0	0	0	0	1	0	0	0	0	0	0	0
21ur-10332	1	0	0	0	0	0	0	0	0	0	0	0	0	0	0	0	0
21ur-10334	0	0	2	0	0	0	0	0	0	0	0	0	0	0	0	0	0
21ur-1034	0	0	0	0	0	0	1	0	0	0	0	0	0	0	0	0	0
21ur-10346	3	0	0	0	0	0	2	0	0	1	0	0	0	0	0	0	0
21ur-10351	1	0	0	0	0	0	0	0	0	1	0	0	1	0	0	0	0
21ur-10353	0	0	0	2	0	0	0	0	0	0	0	0	0	0	0	0	0
21ur-10357	0	0	0	0	0	0	0	0	0	2	0	0	2	0	0	0	0
21ur-10358	0	0	0	0	0	0	0	0	0	0	0	0	0	0	0	0	1
21ur-10359	0	0	0	0	0	0	0	0	0	0	0	0	1	0	0	0	0
21ur-1036	0	0	0	0	0	0	0	0	1	0	0	0	0	0	0	0	0
21ur-10360	0	0	0	0	0	0	0	0	0	0	0	0	1	0	0	0	0
21ur-10361	0	0	0	0	0	0	0	0	0	0	0	0	1	0	0	0	0
21ur-10365	0	0	0	0	0	0	0	0	1	0	0	0	0	0	0	0	0
21ur-10366	1	0	0	0	0	0	0	0	0	0	0	0	0	0	0	0	0
21ur-10367	0	0	1	0	0	0	0	0	0	0	0	0	0	0	0	0	0
21ur-10368	0	0	0	0	0	0	0	0	0	0	0	1	0	0	0	0	0
21ur-1037	0	0	0	0	0	0	0	0	1	0	0	0	0	0	0	0	1
21ur-10372	0	0	0	0	0	0	0	1	0	0	0	0	0	0	0	0	0
21ur-10380	0	0	0	0	0	0	0	0	0	1	0	0	0	0	0	0	0
21ur-10382	0	0	0	0	0	0	0	0	2	0	0	0	0	0	0	0	0
21ur-10386	0	0	0	0	0	0	2	0	0	1	0	0	1	0	0	0	0
21ur-10388	0	0	0	0	0	0	0	0	1	0	0	0	0	1	0	0	0
21ur-10392	1	0	2	1	1	1	8	0	4	3	1	5	3	1	2	0	5
21ur-10393	0	0	1	0	0	0	0	0	0	0	0	0	0	0	0	0	0
21ur-10395	1	0	1	0	5	9	8	4	1	2	0	0	0	0	0	0	2
21ur-104	0	0	0	0	1	0	0	0	0	2	0	0	0	0	0	0	0
21ur-10400	0	0	0	0	0	0	0	0	0	0	0	0	1	0	0	0	0
21ur-10402	0	1	1	2	0	0	0	0	0	2	0	0	0	0	1	0	4
21ur-10404	0	0	0	0	0	0	0	1	0	1	0	0	0	0	1	0	1
21ur-1041	0	0	0	0	0	0	0	0	0	0	0	0	0	0	0	1	0
21ur-10410	0	0	0	0	1	0	0	0	0	0	0	0	1	0	0	0	0
21ur-1042	0	0	0	0	0	0	0	0	0	1	0	0	1	0	0	0	0
21ur-10433	0	0	0	0	3	1	4	4	0	2	0	0	0	0	1	0	0
21ur-10435	0	0	0	0	0	0	1	1	0	0	0	1	0	0	0	0	0
21ur-10437	0	0	0	1	0	0	0	0	1	0	0	0	0	0	0	0	0
21ur-10444	0	0	0	0	0	0	3	0	0	0	0	0	0	0	0	0	0
21ur-10449	0	0	0	0	0	0	0	0	0	1	0	0	0	0	0	0	0
21ur-1045	0	0	0	0	0	0	1	0	1	0	0	0	1	0	0	0	0
21ur-10455	0	0	0	0	0	0	0	0	1	0	0	0	0	0	0	0	0
21ur-10456	0	0	0	0	0	0	0	1	0	0	0	0	0	0	0	0	0
21ur-10458	0	0	2	0	0	0	1	0	1	0	0	0	0	1	0	0	0
21ur-10460	0	1	0	0	2	0	1	0	0	0	1	0	2	0	0	0	0
21ur-10463	0	0	0	0	0	0	0	0	0	0	0	0	0	0	0	0	1
21ur-1047	0	0	0	0	0	0	0	0	1	0	0	0	0	0	0	0	0
21ur-10477	0	0	0	0	0	0	0	0	0	1	0	0	0	0	0	0	0
21ur-10478	0	0	0	0	0	0	0	0	1	0	0	0	0	0	0	0	0
21ur-10479	0	0	0	0	0	0	0	0	0	0	0	0	1	0	0	0	0
21ur-10480	0	0	0	0	0	0	0	0	2	1	0	1	1	0	0	0	0
21ur-10485	0	0	0	0	0	0	0	0	1	0	0	0	0	0	0	0	0
21ur-10487	0	0	1	0	0	0	0	0	0	0	0	0	0	0	0	0	0
21ur-1050	0	0	0	0	0	0	0	0	1	0	0	0	1	0	0	0	1
21ur-10510	0	0	0	0	0	0	1	0	0	0	1	0	0	0	0	0	0
21ur-10512	0	0	0	1	5	0	1	1	0	0	0	0	0	0	0	0	1
21ur-10517	0	0	0	0	0	0	4	0	0	0	0	0	0	0	0	0	0
21ur-10518	2	0	0	0	0	0	0	0	0	0	1	0	0	0	0	0	0
21ur-10521	0	0	0	0	0	0	0	0	1	0	0	0	0	0	0	0	0
21ur-10524	1	0	0	0	0	0	4	4	0	0	0	1	1	0	3	0	0
21ur-10528	0	0	0	0	0	0	0	0	2	0	0	0	0	0	0	0	0
21ur-1053	1	0	0	0	0	0	0	0	0	0	0	0	0	0	0	0	0
21ur-10531	0	0	0	1	0	0	0	0	1	0	1	0	0	0	0	0	0
21ur-10539	0	0	0	0	0	2	1	0	0	0	0	0	0	0	0	0	0
21ur-10542	1	0	0	0	0	0	0	0	0	0	0	0	0	0	0	0	0
21ur-10544	0	0	0	0	0	0	0	0	0	0	0	0	0	1	0	0	0
21ur-10546	0	2	0	0	0	0	0	0	0	0	0	0	0	0	0	0	0
21ur-10554	0	0	0	0	0	0	0	0	0	0	0	0	1	0	0	0	0
21ur-10556	0	0	0	0	0	0	0	0	0	2	0	0	0	0	0	0	0
21ur-10577	0	0	1	0	0	0	0	0	0	0	0	0	0	0	0	0	0
21ur-1058	0	0	0	0	0	0	1	0	1	1	0	0	2	0	0	0	0
21ur-10581	0	0	0	2	0	1	0	0	0	0	0	0	0	0	0	0	0
21ur-10583	0	0	0	0	0	0	0	0	0	0	0	0	1	0	0	0	0
21ur-10584	0	0	0	0	0	0	0	0	0	2	0	0	2	0	0	0	0
21ur-10592	0	0	0	0	0	0	0	0	0	0	0	0	1	0	0	0	0
21ur-10595	1	0	3	3	12	8	7	6	7	3	0	3	3	0	2	0	3
21ur-10597	0	0	1	0	0	0	0	0	0	0	0	0	0	0	0	0	0
21ur-106	0	0	0	0	0	0	0	0	0	0	0	0	0	0	0	0	2
21ur-1060	0	0	0	2	0	0	0	0	0	0	0	0	0	0	0	0	0
21ur-10600	0	1	2	0	1	1	2	4	0	1	2	5	1	1	2	3	5
21ur-10606	0	0	0	0	0	2	4	0	1	0	0	0	0	0	0	0	0
21ur-10610	0	0	0	0	0	0	0	1	0	0	0	0	0	0	0	0	0
21ur-10621	0	0	0	0	0	0	2	0	0	0	0	0	0	0	0	0	0
21ur-10622	0	0	0	0	0	0	0	0	1	0	0	0	0	0	0	0	0
21ur-10629	0	0	0	0	0	0	0	0	0	0	0	0	0	0	0	0	2
21ur-1063	0	0	0	0	1	0	0	0	0	0	0	0	1	0	0	0	0
21ur-10630	0	0	0	0	0	0	0	0	0	1	0	0	0	0	0	0	0
21ur-10633	2	0	0	0	0	0	0	0	0	0	0	0	0	0	0	0	0
21ur-10634	0	0	0	0	0	0	0	0	0	1	0	0	0	0	0	0	0
21ur-10635	0	0	0	0	0	0	0	0	0	1	0	0	0	0	0	0	0
21ur-10645	0	0	0	0	0	0	1	0	0	0	0	0	0	0	0	0	0
21ur-10650	0	0	0	0	0	0	0	0	0	0	0	0	1	0	0	0	0
21ur-10652	1	0	0	0	0	0	0	0	0	0	0	0	0	0	0	0	0
21ur-10653	0	0	0	0	0	0	0	0	1	0	0	0	0	0	0	0	0
21ur-10657	1	0	0	0	0	0	0	1	0	0	0	0	0	0	0	0	0
21ur-1066	0	0	1	0	0	0	1	0	0	1	0	0	0	0	0	0	0
21ur-10660	0	0	0	0	0	0	0	1	0	1	0	0	1	0	0	0	0
21ur-10667	0	0	0	0	0	0	0	0	0	0	0	1	0	0	0	0	0
21ur-10676	1	0	4	0	1	0	0	0	0	0	0	2	0	0	0	0	4
21ur-10677	0	0	0	0	0	0	1	0	0	0	0	0	0	0	0	0	0
21ur-10679	0	0	1	2	0	0	0	0	2	0	2	1	0	0	3	0	5
21ur-1068	0	0	0	0	0	0	0	0	0	0	0	0	1	0	0	0	0
21ur-10681	1	0	0	0	0	0	0	0	0	0	0	0	0	0	0	0	0
21ur-10682	0	0	0	0	0	0	1	0	0	0	0	0	0	0	0	0	1
21ur-10686	0	1	2	3	0	2	2	0	0	1	0	2	0	0	2	1	0
21ur-1069	0	0	0	0	0	0	0	0	0	3	0	0	0	0	0	0	0
21ur-10690	0	0	0	0	0	0	0	0	0	1	0	1	0	0	0	0	0
21ur-10693	0	0	0	0	0	0	0	0	0	0	0	0	0	0	2	0	0
21ur-10694	0	1	0	1	0	0	3	1	4	0	0	0	0	1	0	0	0
21ur-10695	0	0	0	0	0	0	0	0	0	1	0	0	0	0	0	0	0
21ur-10697	0	0	0	0	0	0	0	0	1	1	0	0	0	0	0	0	0
21ur-10699	0	0	0	0	0	0	0	0	0	1	0	0	0	0	0	0	0
21ur-1070	0	1	1	0	1	6	5	1	1	3	0	1	0	0	0	0	0
21ur-10700	0	0	0	0	0	0	1	0	0	0	0	0	0	0	0	0	0
21ur-10703	0	0	0	0	0	0	0	0	0	0	0	1	0	0	0	0	0
21ur-10709	0	0	0	0	0	0	0	0	0	0	0	0	1	0	0	0	0
21ur-1071	0	0	0	0	0	0	2	0	0	0	0	0	0	0	0	0	0
21ur-10711	0	0	0	1	0	0	0	0	0	0	0	0	0	0	0	0	0
21ur-10713	0	0	1	0	0	0	0	0	0	0	0	0	0	0	0	0	0
21ur-10714	1	0	0	0	0	0	0	0	0	0	0	0	0	0	0	0	0
21ur-10715	0	0	0	0	0	0	0	0	0	0	0	0	0	0	0	0	1
21ur-10716	0	0	0	0	0	0	0	0	0	0	0	1	0	0	0	0	0
21ur-10720	0	0	1	0	1	0	0	0	1	1	0	0	2	0	0	1	0
21ur-10722	0	0	0	0	0	1	0	0	1	0	0	0	0	0	0	0	0
21ur-10725	0	0	0	0	0	0	3	0	0	0	0	0	0	0	0	0	0
21ur-10728	0	0	0	0	0	0	0	0	0	1	0	0	0	0	0	0	0
21ur-10731	0	0	2	0	0	0	0	0	0	0	0	0	0	0	0	0	0
21ur-10733	0	0	0	1	0	0	0	0	0	0	0	0	0	0	0	0	0
21ur-10734	0	0	0	0	0	0	1	0	0	0	0	0	0	0	0	0	0
21ur-10739	0	0	0	3	0	0	1	0	1	0	0	0	0	0	0	0	0
21ur-10740	0	0	0	0	0	0	0	0	0	0	0	0	1	0	0	0	0
21ur-10743	0	0	0	0	0	1	0	0	0	0	0	0	1	0	0	0	0
21ur-10744	0	0	0	0	0	0	0	0	0	0	0	0	1	0	0	0	0
21ur-10751	0	0	0	0	0	0	0	0	1	0	0	0	0	0	0	0	0
21ur-10753	0	0	0	0	0	0	0	0	1	0	0	0	0	0	0	0	0
21ur-10756	0	0	0	0	0	0	0	0	1	0	0	0	0	0	0	0	0
21ur-10757	0	0	0	0	0	0	1	0	0	0	0	0	0	0	0	0	0
21ur-10759	0	0	3	1	1	0	0	0	1	0	0	2	1	0	0	0	0
21ur-1076	1	0	0	0	0	0	0	0	0	0	0	0	0	2	0	0	0
21ur-10761	0	0	0	0	0	0	0	0	0	1	0	0	0	0	0	0	0
21ur-10762	1	0	0	0	0	0	0	0	0	0	0	0	0	0	0	0	0
21ur-10767	0	0	0	0	0	0	1	0	0	0	0	0	1	0	0	0	0
21ur-10771	0	0	0	0	0	1	0	0	0	0	0	0	0	0	0	0	0
21ur-10773	0	0	0	0	0	0	0	0	0	0	0	0	0	0	0	0	1
21ur-10778	0	0	0	0	0	0	0	0	0	2	0	0	0	0	0	0	0
21ur-1078	0	0	0	0	0	0	0	0	0	2	0	0	0	0	0	0	0
21ur-10782	0	0	0	0	0	0	0	0	0	2	0	3	0	0	0	0	0
21ur-10783	3	0	0	0	0	0	0	0	0	0	0	0	0	0	0	0	0
21ur-10784	0	0	0	0	0	0	0	1	0	0	0	0	0	0	0	0	1
21ur-10785	0	0	0	0	0	1	0	0	0	0	0	0	1	0	0	0	0
21ur-10787	0	0	0	0	0	0	0	0	1	0	0	0	0	0	0	0	0
21ur-10788	0	0	0	0	0	0	0	0	1	0	0	0	1	0	0	0	0
21ur-10792	0	0	0	0	0	1	0	0	0	0	0	0	0	0	0	0	0
21ur-1080	0	0	0	0	0	0	0	0	0	1	0	0	0	0	0	0	0
21ur-10805	0	0	1	0	0	0	1	0	0	2	0	0	0	0	0	0	0
21ur-10809	0	0	0	0	0	0	0	0	0	2	0	0	1	0	0	0	0
21ur-1081	0	0	0	0	0	0	2	0	2	0	0	0	0	0	0	0	1
21ur-10810	0	0	0	0	0	0	0	0	0	0	0	0	1	0	0	0	0
21ur-10812	0	0	0	0	0	0	0	1	0	0	0	0	0	0	0	0	0
21ur-10813	0	0	0	0	1	0	0	0	0	0	0	0	0	0	0	0	0
21ur-10815	0	0	0	0	0	0	0	0	0	0	0	0	0	0	0	0	1
21ur-10817	1	2	2	1	0	5	3	1	1	0	0	0	1	7	4	4	6
21ur-1082	0	0	0	0	0	0	0	0	0	1	0	0	0	0	0	0	0
21ur-10825	0	0	0	0	0	0	0	0	1	0	0	0	0	0	0	0	0
21ur-10829	2	0	16	3	1	2	5	2	0	0	0	1	0	0	0	1	3
21ur-10840	0	0	0	0	0	0	0	0	1	0	0	0	0	0	0	0	0
21ur-10843	0	0	0	0	0	0	0	0	1	0	0	0	0	0	0	0	0
21ur-10851	0	0	0	0	0	0	0	0	0	0	0	0	1	0	0	0	0
21ur-10854	0	0	0	0	0	0	0	0	0	1	0	0	0	0	0	0	4
21ur-10857	0	0	0	0	2	2	1	0	0	0	0	0	0	0	0	0	1
21ur-10861	0	0	0	0	0	0	0	0	0	0	1	0	0	0	0	0	0
21ur-10862	0	0	0	1	0	0	0	0	0	0	0	0	0	0	0	0	0
21ur-10864	0	0	0	0	0	0	0	0	0	1	0	0	2	0	0	0	0
21ur-1087	0	0	0	1	0	0	0	0	0	1	0	1	1	0	0	0	0
21ur-1088	0	1	0	0	0	0	1	0	0	0	0	0	0	0	0	0	0
21ur-10880	0	0	0	0	0	0	0	0	0	0	0	0	0	0	0	0	1
21ur-10882	0	0	0	1	0	0	0	0	0	0	0	0	0	0	0	0	0
21ur-10883	0	0	0	0	0	0	0	0	0	1	0	0	0	0	0	0	0
21ur-10884	0	0	0	0	1	0	0	0	0	0	0	0	0	0	0	0	0
21ur-10885	1	0	0	0	0	0	0	0	0	0	0	0	0	0	0	0	0
21ur-10890	0	0	0	0	2	1	3	5	0	0	0	0	0	0	0	0	0
21ur-10891	0	1	0	0	0	0	0	0	1	1	0	3	0	0	0	0	1
21ur-1090	0	0	0	0	0	0	0	0	1	1	0	0	0	0	0	0	0
21ur-10902	0	0	0	0	0	0	0	0	0	0	0	0	1	0	0	0	0
21ur-10907	0	0	0	0	0	0	0	0	0	0	0	0	1	0	0	0	0
21ur-1091	0	0	0	0	0	1	0	0	0	0	0	0	0	0	0	0	0
21ur-10919	0	0	0	0	0	0	0	0	0	0	0	0	1	0	0	0	0
21ur-10927	0	1	2	2	1	0	3	1	1	3	3	1	1	0	1	0	1
21ur-10931	0	0	0	0	0	0	0	0	1	0	0	0	1	0	0	0	0
21ur-10933	0	0	0	2	0	0	0	0	0	0	1	0	1	0	0	0	2
21ur-1094	0	0	0	0	0	0	2	0	0	0	2	0	3	0	0	0	0
21ur-10954	0	0	0	0	0	0	0	0	0	1	0	0	0	0	0	0	0
21ur-10957	0	0	2	0	2	0	0	1	0	0	0	2	1	0	0	0	0
21ur-10965	1	0	0	0	0	0	0	0	0	0	0	0	0	0	0	0	0
21ur-10967	0	0	2	0	0	0	0	0	0	0	0	0	0	0	0	0	0
21ur-10968	0	0	0	0	0	0	0	0	0	0	0	0	1	0	0	0	0
21ur-10969	0	0	0	0	0	0	0	0	0	1	0	0	1	0	0	0	0
21ur-1097	0	0	0	0	0	0	0	0	1	2	0	0	0	0	0	0	0
21ur-10980	0	0	0	0	0	0	0	0	0	0	0	0	1	0	0	0	0
21ur-10985	0	0	0	0	0	0	0	0	0	0	0	0	1	0	0	0	0
21ur-10988	0	0	0	0	0	0	0	0	0	1	0	0	0	0	0	0	0
21ur-10989	0	0	0	0	0	1	0	0	0	2	0	1	0	0	1	0	0
21ur-1099	0	0	0	0	0	0	0	0	1	0	0	0	0	0	0	0	0
21ur-10998	0	0	1	0	0	0	0	0	0	0	0	0	0	0	0	0	0
21ur-11001	1	0	0	0	0	0	0	0	0	0	0	0	0	0	0	0	0
21ur-11007	1	0	0	0	0	0	0	0	1	0	0	0	0	0	0	0	0
21ur-1101	1	0	0	0	0	0	1	0	0	0	0	0	0	0	0	0	0
21ur-11014	0	0	0	0	0	0	0	0	0	0	0	0	0	0	0	0	1
21ur-11017	0	0	0	0	0	0	0	0	0	0	0	0	1	0	0	0	0
21ur-11026	1	0	0	0	0	0	1	0	1	1	1	1	1	0	1	1	0
21ur-1103	0	0	0	0	0	0	0	0	0	0	0	0	0	0	0	0	1
21ur-11039	0	0	0	1	0	0	0	0	0	0	0	0	0	0	0	0	0
21ur-1104	0	0	0	0	0	0	1	0	0	0	0	0	0	0	0	0	0
21ur-11052	0	0	0	0	0	1	1	0	0	0	0	0	0	0	0	0	0
21ur-1106	0	0	1	0	0	0	0	0	2	1	0	0	0	0	0	1	1
21ur-11062	0	0	1	0	0	4	1	3	2	0	0	0	0	0	0	0	0
21ur-11063	1	0	0	0	0	0	1	0	0	0	0	0	0	0	0	0	0
21ur-11064	0	0	0	0	0	0	0	0	0	1	0	0	1	0	0	0	0
21ur-11067	0	0	0	0	0	0	0	0	0	1	0	0	0	0	0	0	0
21ur-11068	1	0	0	0	0	0	0	0	0	0	0	0	0	0	0	0	0
21ur-11069	0	0	0	0	0	0	0	0	2	0	0	0	0	0	0	0	0
21ur-11073	0	0	1	0	0	0	3	0	1	1	0	0	2	0	0	0	0
21ur-11074	0	0	0	0	1	0	0	0	0	0	0	0	0	0	0	0	0
21ur-11076	0	0	0	0	0	0	1	0	0	0	0	0	1	0	0	0	0
21ur-11077	0	0	0	0	0	0	0	3	0	0	0	0	0	0	0	0	0
21ur-11078	0	0	0	1	1	0	0	0	0	0	0	0	0	0	0	0	0
21ur-11079	0	0	0	0	0	0	0	0	0	1	0	1	0	0	0	0	0
21ur-11082	2	0	0	1	0	1	0	0	0	0	0	0	0	0	0	0	2
21ur-11084	0	0	0	0	0	0	0	0	0	1	0	0	0	0	0	0	0
21ur-11085	0	1	0	0	2	7	19	3	1	5	0	0	1	0	0	0	1
21ur-11088	0	0	0	0	0	0	0	0	1	0	0	1	1	0	0	0	0
21ur-11092	0	0	0	0	1	0	0	0	0	0	0	1	0	0	0	0	0
21ur-111	0	0	0	0	0	0	0	0	1	0	0	0	0	0	0	0	0
21ur-11100	1	1	10	1	0	0	1	3	3	3	3	7	4	3	3	7	6
21ur-11102	0	0	0	0	0	0	0	0	0	1	0	0	0	0	0	0	0
21ur-11105	1	1	6	6	1	1	1	1	2	1	0	4	0	0	0	0	2
21ur-11109	0	0	0	0	0	0	0	0	0	0	0	0	1	0	0	0	0
21ur-11112	0	0	0	1	0	0	0	0	0	0	0	0	0	0	0	0	0
21ur-11118	0	0	1	0	0	0	0	1	0	0	0	0	0	0	0	0	0
21ur-11120	0	0	0	0	0	0	0	0	3	0	0	0	0	0	0	0	0
21ur-11127	1	0	0	0	0	0	0	0	0	1	0	0	0	0	0	0	0
21ur-11128	0	0	0	0	0	0	0	0	0	1	0	0	0	0	0	0	0
21ur-11133	1	0	0	0	0	0	0	0	0	0	0	0	0	0	0	0	0
21ur-11135	0	0	3	3	1	2	1	0	3	0	1	1	2	0	1	1	1
21ur-11138	0	0	0	0	1	0	3	0	0	0	0	0	0	0	0	0	0
21ur-11139	0	0	8	0	0	0	0	0	0	0	0	0	0	0	0	0	0
21ur-1114	0	0	0	0	0	0	0	0	0	0	0	0	0	0	0	0	1
21ur-11141	1	0	0	1	0	0	0	0	0	0	0	0	0	0	0	0	0
21ur-11145	0	0	3	0	0	0	0	0	0	0	0	1	0	0	0	0	0
21ur-1115	0	0	0	0	0	0	2	0	0	0	0	0	1	0	0	0	1
21ur-11151	0	0	1	0	0	0	0	0	1	0	0	1	3	0	0	0	0
21ur-11158	0	0	0	0	0	0	0	0	0	0	0	0	0	0	0	0	2
21ur-11159	0	0	0	0	0	0	0	0	0	0	0	2	0	0	0	0	0
21ur-11165	0	0	1	0	0	1	0	0	0	0	0	0	0	0	0	0	1
21ur-1117	0	0	0	0	0	0	0	0	0	1	0	0	0	0	0	0	1
21ur-11172	0	0	0	0	0	0	0	0	0	1	0	0	0	0	0	0	1
21ur-11173	0	0	0	0	0	0	1	0	0	0	0	1	1	1	0	0	0
21ur-11178	0	0	1	0	0	1	1	0	0	0	0	2	0	0	0	0	0
21ur-1118	0	0	0	0	0	0	0	0	0	1	0	0	0	0	0	0	0
21ur-11186	0	0	0	0	0	0	0	0	0	0	0	0	1	0	1	0	0
21ur-1119	0	0	0	0	0	2	0	0	0	3	0	0	0	0	0	0	0
21ur-11194	0	0	0	0	0	0	3	0	0	0	0	0	0	0	0	0	0
21ur-11196	0	1	0	0	0	0	0	0	0	0	0	0	0	0	0	0	0
21ur-11199	0	1	0	0	0	0	0	0	0	0	0	0	1	0	0	0	1
21ur-112	0	0	0	0	0	0	0	0	0	0	0	0	1	0	0	0	0
21ur-11200	0	0	0	1	0	0	0	0	0	0	0	2	0	0	0	0	0
21ur-11201	0	0	0	0	0	2	0	0	0	0	0	0	1	0	0	0	0
21ur-11204	2	0	0	0	0	0	0	0	0	0	0	0	0	0	0	0	0
21ur-11205	0	0	0	0	0	0	0	0	0	0	0	0	0	0	0	1	0
21ur-11213	0	0	0	0	0	0	1	0	0	0	0	0	2	0	0	0	0
21ur-11214	2	0	0	0	0	0	0	0	0	0	0	0	0	0	0	0	1
21ur-1122	0	0	1	0	0	0	0	0	0	0	0	0	0	0	0	0	0
21ur-11229	0	0	0	0	0	0	0	0	1	0	0	0	0	0	0	0	0
21ur-11230	0	0	0	0	0	0	0	1	0	1	0	0	0	0	0	0	0
21ur-11232	0	0	0	0	0	0	0	0	0	1	0	0	0	0	0	0	0
21ur-11234	0	0	0	0	0	0	0	0	0	1	0	0	0	0	0	0	0
21ur-11236	1	0	0	0	0	0	0	0	0	0	0	0	0	0	0	0	0
21ur-1124	0	1	1	0	4	2	6	2	2	4	0	0	0	0	0	0	0
21ur-11243	0	0	0	0	0	0	0	0	0	0	0	0	0	0	1	0	1
21ur-11250	0	1	0	0	0	0	0	0	0	0	0	0	0	0	0	0	0
21ur-11258	0	0	0	0	0	0	0	0	0	0	0	1	0	0	0	0	0
21ur-1126	1	0	0	0	0	0	0	0	0	1	0	0	0	0	0	0	0
21ur-11261	0	1	3	2	1	0	3	1	6	1	2	3	3	1	1	5	7
21ur-11263	0	0	0	0	0	0	1	0	0	0	0	0	1	0	0	0	0
21ur-11264	0	0	0	0	0	0	0	0	2	0	0	0	0	0	0	0	0
21ur-11265	0	0	0	0	0	0	0	0	0	1	0	0	2	0	0	0	0
21ur-11266	0	0	0	0	0	0	1	0	0	0	0	0	0	0	0	0	0
21ur-11274	0	0	0	1	0	0	1	0	0	0	0	0	0	0	0	0	1
21ur-1128	0	0	0	0	0	0	1	0	0	0	0	0	0	0	0	0	0
21ur-11282	0	1	0	0	0	1	2	0	0	0	0	0	0	0	0	0	0
21ur-11287	0	1	0	0	0	0	0	0	0	0	0	0	2	0	0	0	0
21ur-11291	0	0	0	0	0	0	2	0	1	0	0	0	0	0	0	0	0
21ur-11301	1	1	0	0	0	0	0	0	0	1	0	0	0	0	0	0	1
21ur-11309	1	0	0	0	0	0	0	0	0	0	0	0	0	0	0	0	0
21ur-1131	0	0	0	0	0	0	0	0	0	0	0	0	1	0	0	0	0
21ur-11311	0	0	1	0	0	2	0	0	0	0	0	0	0	0	0	0	0
21ur-11312	0	0	0	0	0	2	0	0	0	0	0	0	0	0	0	0	0
21ur-11315	0	1	0	0	0	2	0	0	1	0	0	1	0	0	0	2	0
21ur-11316	1	0	0	0	2	0	0	0	1	1	0	0	0	0	0	0	0
21ur-11320	0	0	0	0	0	0	0	0	1	1	0	0	0	0	0	0	0
21ur-11321	0	0	0	0	0	0	0	0	0	0	0	0	0	0	0	0	1
21ur-1133	2	8	5	1	2	6	3	5	1	7	5	7	3	6	8	6	4
21ur-11331	0	0	0	0	0	0	0	0	0	0	0	0	1	0	0	0	0
21ur-11333	0	0	0	0	0	0	0	0	0	0	0	0	1	0	0	0	0
21ur-1134	0	0	0	0	0	0	1	0	0	0	0	0	0	0	0	0	0
21ur-11343	0	0	0	0	1	0	0	0	0	0	0	0	0	0	0	0	0
21ur-11344	0	0	0	0	0	0	0	0	0	1	0	0	0	0	0	0	0
21ur-11358	1	0	1	0	0	1	0	0	1	0	0	1	0	1	0	2	0
21ur-11360	0	0	1	0	0	2	2	2	0	3	1	1	0	0	1	0	0
21ur-11363	1	0	0	0	0	0	0	0	0	0	0	1	0	0	0	0	0
21ur-11369	0	1	3	0	1	0	0	0	0	0	0	0	0	0	0	0	0
21ur-11371	0	0	0	0	0	0	0	0	0	0	0	0	0	0	0	0	1
21ur-11375	0	0	2	0	1	3	4	0	3	6	0	0	0	0	0	0	0
21ur-11378	1	0	0	1	0	0	1	1	0	0	0	1	0	0	0	0	0
21ur-1138	0	0	0	0	0	0	0	0	0	0	0	0	0	0	1	0	0
21ur-11380	0	0	0	0	0	0	0	0	1	0	0	0	0	0	0	0	0
21ur-11381	0	0	0	0	0	0	1	0	0	0	0	0	0	0	0	0	0
21ur-11385	1	0	0	0	0	0	0	0	0	0	0	0	0	0	0	0	0
21ur-11394	0	0	0	0	0	0	0	0	0	0	0	0	2	0	0	0	0
21ur-11399	0	0	0	1	0	1	0	1	3	0	0	1	1	0	0	0	0
21ur-114	0	0	0	0	1	0	0	0	0	0	0	0	0	0	0	0	0
21ur-1140	0	0	0	0	0	0	1	0	0	0	0	0	0	0	0	0	0
21ur-11413	0	0	0	0	0	0	0	0	0	1	0	0	0	0	0	0	0
21ur-11426	0	1	0	0	0	0	0	0	0	1	0	0	0	0	0	0	0
21ur-11432	0	0	0	0	0	4	3	0	1	1	0	0	1	0	0	0	0
21ur-11433	0	0	0	0	0	0	0	0	0	0	0	1	0	0	0	0	0
21ur-11435	0	1	0	3	0	0	1	0	0	1	0	0	0	0	0	0	0
21ur-11436	0	0	0	0	0	0	2	0	0	0	0	0	0	0	0	0	0
21ur-11438	0	0	0	0	0	0	0	0	0	1	0	0	0	0	0	0	0
21ur-11439	0	0	0	0	0	0	0	0	2	0	0	0	0	0	0	0	0
21ur-11446	0	0	0	0	0	0	0	0	0	0	0	0	1	0	0	0	0
21ur-1145	0	0	0	0	4	5	7	2	1	2	1	0	0	0	0	0	0
21ur-11452	0	0	0	0	0	0	0	0	0	0	0	1	1	0	0	0	0
21ur-11457	0	0	0	1	0	0	0	0	0	0	0	0	0	0	0	0	0
21ur-11466	0	0	0	0	0	0	0	0	0	1	0	2	0	0	0	1	2
21ur-11468	0	0	0	0	0	0	0	0	0	0	0	0	0	0	0	1	0
21ur-11469	0	0	0	0	0	0	1	1	1	0	1	0	0	1	0	0	0
21ur-11470	0	0	0	0	0	0	1	0	0	0	0	0	0	0	0	0	0
21ur-11474	0	0	0	0	0	0	0	0	0	1	0	0	0	0	0	0	0
21ur-11480	0	0	0	0	0	0	0	0	0	1	0	0	0	0	0	0	0
21ur-11485	0	0	0	0	0	0	0	0	0	1	0	1	0	0	0	0	0
21ur-11489	2	0	0	0	0	0	0	0	0	0	0	0	0	0	0	0	0
21ur-11495	0	0	0	0	1	1	0	0	0	0	0	0	0	0	0	0	0
21ur-115	0	0	0	0	0	0	0	0	0	0	0	0	1	0	0	0	0
21ur-11501	0	0	0	0	0	0	0	0	1	0	0	0	0	0	0	0	0
21ur-11512	1	0	0	0	0	0	1	0	0	1	0	0	2	1	0	0	0
21ur-1152	1	0	0	0	0	0	0	0	0	1	1	0	0	0	0	0	1
21ur-11523	0	0	0	0	0	0	0	0	0	0	0	0	1	0	0	0	0
21ur-11529	1	0	0	1	0	1	0	0	1	2	1	0	2	1	1	0	5
21ur-11536	0	0	0	0	0	0	0	0	0	0	0	0	0	0	0	0	1
21ur-11539	0	0	0	0	0	0	0	0	1	0	0	0	0	0	0	0	0
21ur-11544	0	0	0	0	0	0	1	0	0	0	0	0	0	0	0	1	0
21ur-11546	2	0	0	1	0	0	0	0	0	0	0	0	0	0	0	0	0
21ur-11547	0	0	0	0	0	0	0	0	0	1	0	0	0	0	0	0	0
21ur-11548	0	0	0	0	0	0	2	1	0	0	0	0	0	0	0	0	0
21ur-11549	0	0	0	0	0	0	0	0	0	1	0	2	0	0	0	0	0
21ur-11551	1	0	0	0	0	0	6	0	0	0	0	0	0	0	0	0	0
21ur-11552	0	0	1	0	0	0	0	0	0	0	0	0	0	0	0	0	0
21ur-11559	0	0	0	0	0	0	0	0	0	0	1	0	0	0	0	0	0
21ur-1156	0	0	0	0	0	0	0	0	0	0	0	0	1	0	0	0	0
21ur-11561	0	0	0	0	0	0	1	0	0	0	0	0	0	0	0	0	0
21ur-11563	0	0	0	1	0	0	2	0	0	0	0	0	0	0	0	0	0
21ur-11567	0	0	1	0	0	1	0	0	1	0	0	0	0	0	2	0	0
21ur-1157	0	0	0	0	0	0	0	0	1	0	0	0	0	0	0	0	0
21ur-11570	0	1	0	0	0	0	0	0	0	2	0	0	0	0	0	0	1
21ur-11572	0	0	0	0	0	0	0	0	0	0	0	0	1	0	0	0	0
21ur-11574	0	0	0	0	0	0	0	0	0	1	0	0	0	0	0	0	0
21ur-11577	1	0	0	0	0	0	1	0	0	0	0	0	1	0	0	0	0
21ur-11578	0	0	0	0	0	0	0	0	0	0	0	1	0	0	0	0	0
21ur-11581	0	0	0	0	0	0	1	0	0	0	0	1	0	0	0	0	1
21ur-11585	4	2	2	4	1	1	5	1	5	6	3	5	2	3	6	3	6
21ur-11587	0	0	0	0	0	0	0	0	0	0	0	0	0	0	0	0	2
21ur-11592	0	0	0	0	0	0	0	0	0	0	0	0	1	0	0	0	0
21ur-116	0	0	0	0	0	0	1	0	0	1	0	0	1	1	2	0	0
21ur-11602	0	0	0	0	0	3	2	0	1	0	0	0	1	0	0	0	0
21ur-11604	1	0	3	0	1	1	1	0	1	0	0	0	0	0	1	0	0
21ur-11605	0	0	0	0	0	0	1	0	0	0	0	0	0	0	0	0	1
21ur-11607	0	0	0	0	0	0	0	0	1	0	0	0	0	0	0	0	0
21ur-1161	0	0	0	0	1	0	0	0	0	0	0	0	0	0	0	0	0
21ur-11611	0	0	0	2	6	1	0	3	1	1	0	1	0	0	0	0	0
21ur-11616	0	0	0	0	0	0	0	0	0	0	0	0	0	0	0	0	1
21ur-11619	0	0	0	0	0	0	0	0	0	0	0	0	1	0	0	0	0
21ur-1162	0	1	0	0	0	0	0	0	0	0	0	0	0	0	0	0	0
21ur-11621	0	1	0	0	0	0	0	0	0	0	0	0	0	0	0	0	0
21ur-11622	0	0	1	0	0	0	0	0	0	0	0	0	0	0	0	0	0
21ur-11625	0	0	0	0	4	0	4	1	0	0	0	0	0	0	0	0	0
21ur-1163	0	0	0	0	0	0	0	0	0	0	0	0	1	0	0	0	0
21ur-11631	0	0	2	3	0	0	0	0	0	0	0	1	0	1	0	0	1
21ur-11632	0	0	3	0	0	0	1	0	0	0	0	0	0	0	0	0	1
21ur-11636	0	0	0	0	0	1	0	0	0	0	0	0	0	0	0	0	0
21ur-11645	0	0	0	0	0	0	0	0	0	0	0	1	1	0	0	0	0
21ur-11648	0	0	0	0	0	0	0	0	1	2	0	0	1	0	0	0	0
21ur-11651	0	0	0	0	0	2	0	0	0	0	0	0	0	0	0	0	0
21ur-11652	0	0	0	0	0	0	0	0	0	1	0	0	0	0	0	0	0
21ur-11653	0	0	0	0	0	0	0	0	0	0	0	0	1	0	0	0	0
21ur-11658	0	0	0	0	0	0	0	0	0	1	0	0	0	0	0	0	0
21ur-11661	0	0	0	0	0	1	1	0	0	0	0	0	0	0	0	0	0
21ur-11665	0	1	0	0	0	0	0	0	0	0	0	0	1	0	0	0	0
21ur-11668	0	0	0	0	0	0	1	1	0	0	0	0	0	0	0	0	0
21ur-11670	1	0	0	0	0	0	0	0	0	1	0	0	0	0	0	0	0
21ur-11676	1	0	0	0	0	0	0	0	1	0	0	2	1	0	0	0	0
21ur-11678	0	0	2	0	0	1	2	0	0	0	0	0	1	0	1	0	0
21ur-11679	0	0	0	0	2	2	0	0	0	0	0	0	0	0	0	0	0
21ur-11683	0	0	0	0	0	0	0	0	1	0	0	0	0	0	0	0	0
21ur-11702	1	0	0	0	0	0	0	0	0	0	0	0	0	0	0	0	0
21ur-11703	0	0	0	0	0	0	0	0	0	0	0	0	0	0	0	0	2
21ur-11706	0	0	4	0	6	2	10	4	0	4	0	1	2	0	0	0	0
21ur-1171	2	0	0	0	0	0	0	0	0	0	0	0	0	0	0	0	0
21ur-11710	0	0	0	0	1	0	0	0	0	0	0	0	0	0	0	0	0
21ur-11711	0	0	0	0	1	0	0	0	0	0	0	0	0	0	0	0	0
21ur-11714	0	0	0	0	0	0	1	0	0	0	0	0	0	0	0	0	0
21ur-11720	0	0	0	0	0	0	0	0	0	0	0	0	0	0	0	0	1
21ur-11722	0	0	0	1	0	0	0	0	0	0	0	0	1	0	0	0	0
21ur-1173	0	0	0	1	0	0	0	0	1	0	0	0	0	0	0	0	0
21ur-11730	1	0	0	0	0	0	0	0	0	0	0	2	1	0	1	0	0
21ur-11736	0	0	0	0	0	0	1	0	0	1	0	0	0	0	0	0	0
21ur-11737	3	0	2	0	0	0	3	0	0	0	0	1	3	0	0	0	0
21ur-1174	0	0	0	0	0	0	0	0	0	0	0	0	1	0	0	0	0
21ur-11746	0	0	0	0	0	0	2	2	0	0	0	0	0	0	0	0	0
21ur-11751	0	0	0	0	0	0	1	0	0	0	0	0	0	0	0	0	0
21ur-11767	0	0	0	0	0	0	0	0	0	1	0	0	0	0	0	0	0
21ur-1177	0	0	0	0	0	0	0	0	0	0	0	0	1	0	0	0	0
21ur-11774	0	0	1	0	0	1	1	0	0	2	0	0	0	0	0	0	1
21ur-11777	0	0	0	0	0	0	0	0	0	0	0	0	1	0	0	0	0
21ur-11778	0	0	0	0	0	0	0	0	0	1	0	0	0	0	0	0	0
21ur-11783	1	0	0	0	0	0	0	0	0	0	0	0	0	0	0	0	0
21ur-11786	0	0	0	0	0	0	0	0	0	3	0	0	1	0	0	0	0
21ur-1179	0	0	0	0	0	0	0	0	0	1	0	0	2	0	0	0	0
21ur-11795	0	0	1	0	0	0	0	0	0	0	0	0	0	0	0	0	0
21ur-1180	1	0	0	0	0	0	0	0	0	0	0	0	0	0	0	0	1
21ur-11801	0	0	0	0	0	0	0	0	0	1	0	0	1	0	0	0	0
21ur-11804	0	0	1	0	0	0	0	0	0	0	0	0	0	0	0	0	0
21ur-11808	0	0	0	0	0	1	0	0	0	0	0	0	0	0	0	0	0
21ur-11811	1	0	0	0	0	0	0	0	0	1	0	0	0	0	0	0	0
21ur-11822	0	0	0	0	0	0	0	0	0	1	0	0	0	0	0	0	0
21ur-11823	0	0	0	0	0	0	0	0	0	2	0	0	0	0	0	0	0
21ur-11824	0	0	0	0	0	0	0	0	0	0	0	1	0	0	0	0	0
21ur-11825	0	0	0	0	0	4	1	0	0	1	0	0	2	0	1	0	1
21ur-11828	0	0	0	0	0	2	2	0	0	0	0	0	1	0	0	0	0
21ur-11829	0	0	0	0	0	1	0	0	0	2	0	0	1	0	0	0	1
21ur-1184	0	0	1	0	0	0	0	0	0	1	0	0	0	0	0	0	1
21ur-11841	0	0	0	0	0	0	0	0	0	0	0	0	1	0	0	0	0
21ur-11845	0	0	0	0	0	0	1	0	1	0	0	1	1	0	0	0	0
21ur-1185	0	0	0	0	0	0	2	0	0	0	0	0	0	0	0	0	0
21ur-11851	0	0	0	0	0	0	0	0	0	1	0	0	0	0	0	0	0
21ur-11854	0	0	2	0	2	0	1	2	0	2	3	4	0	1	0	1	5
21ur-11857	0	0	0	1	0	0	0	0	0	0	0	0	0	0	0	0	0
21ur-11859	0	0	0	0	0	0	0	0	0	0	0	0	1	0	0	0	0
21ur-11860	4	2	8	4	2	2	10	7	7	6	3	5	2	3	12	3	9
21ur-11863	0	0	0	0	0	0	0	0	0	0	0	0	0	0	0	0	1
21ur-11866	0	0	0	0	0	0	0	0	0	0	0	0	1	0	0	0	0
21ur-11868	0	0	2	0	0	0	0	0	0	0	0	0	0	0	0	0	0
21ur-1187	0	0	0	0	1	0	0	0	0	0	0	0	0	0	0	0	0
21ur-11871	0	0	0	0	0	0	0	0	0	1	0	0	0	0	0	0	0
21ur-11873	0	0	0	0	0	0	0	0	0	0	0	0	2	0	0	0	0
21ur-11876	0	0	0	0	1	0	0	1	0	0	0	1	0	0	0	0	0
21ur-11882	0	0	0	0	0	0	2	0	0	0	0	0	0	0	0	0	0
21ur-11890	0	0	0	0	0	0	0	0	0	2	0	0	1	0	0	0	0
21ur-11891	0	0	0	0	0	0	0	0	0	0	0	0	1	0	0	0	0
21ur-11892	0	0	0	0	0	0	1	0	1	0	0	0	0	1	1	0	1
21ur-11893	0	0	0	0	0	0	1	0	0	0	0	0	0	0	0	0	0
21ur-11894	0	0	0	0	0	0	0	0	0	0	0	0	0	0	0	0	1
21ur-11895	0	0	0	0	0	0	0	0	1	0	0	0	0	0	0	0	0
21ur-11897	2	0	0	0	0	0	0	0	0	0	0	0	0	0	0	0	0
21ur-11900	0	0	0	0	0	0	0	0	0	0	1	0	0	0	0	0	0
21ur-11902	0	0	0	1	0	1	0	0	1	1	0	1	1	0	0	0	1
21ur-11903	0	0	0	0	0	0	1	0	0	1	0	0	0	0	0	0	0
21ur-11910	0	0	2	0	0	0	0	0	0	1	0	0	0	0	0	0	0
21ur-11916	0	0	0	0	0	0	0	0	0	0	0	0	1	0	0	0	0
21ur-11917	0	0	0	0	0	0	1	0	0	0	0	0	0	0	0	0	0
21ur-1192	0	0	0	0	0	0	0	0	0	0	0	0	1	0	0	0	0
21ur-11923	1	0	1	1	0	0	0	0	0	0	0	0	0	0	0	0	0
21ur-11927	0	0	0	0	0	0	0	1	1	0	0	0	0	0	0	0	0
21ur-11928	0	0	0	0	0	0	0	0	0	0	0	0	1	0	0	0	0
21ur-11930	0	0	0	0	0	0	0	0	0	1	0	0	0	0	0	0	0
21ur-11931	0	0	0	0	2	0	0	0	0	0	0	0	0	0	0	0	0
21ur-11933	4	3	19	13	3	6	2	7	28	14	2	12	9	14	6	12	31
21ur-11934	0	0	0	0	0	0	0	0	0	0	0	0	1	0	0	0	0
21ur-11941	0	0	0	0	1	0	0	0	0	3	0	0	0	0	0	0	0
21ur-11942	0	0	0	0	0	0	1	0	0	2	0	0	0	0	0	0	0
21ur-11948	0	0	0	0	0	0	0	0	0	1	0	0	0	0	0	0	0
21ur-1195	0	0	0	0	0	0	0	0	0	0	0	1	0	0	0	0	0
21ur-11954	0	0	0	0	0	0	0	0	0	1	0	0	0	0	0	0	0
21ur-11955	0	0	0	0	0	0	0	0	0	0	0	0	2	0	0	0	0
21ur-11958	0	0	0	0	0	0	0	0	0	2	0	0	0	0	0	0	0
21ur-1196	0	0	0	0	0	0	0	0	0	0	0	0	1	0	0	0	0
21ur-11971	1	0	0	0	0	0	0	0	0	0	0	0	0	0	0	0	0
21ur-11977	1	0	0	0	0	0	0	0	0	2	0	1	0	0	0	0	0
21ur-11984	0	0	0	0	0	0	0	0	0	0	0	0	1	0	0	0	0
21ur-11988	0	0	0	0	0	0	0	0	0	1	0	0	1	0	0	0	0
21ur-1199	1	0	0	0	0	0	0	0	0	0	0	0	0	0	0	0	0
21ur-1202	0	0	2	0	0	1	0	0	0	2	0	0	1	0	0	0	1
21ur-12029	0	0	0	0	0	0	0	0	1	0	0	0	0	0	0	0	0
21ur-12034	0	0	0	0	0	0	0	0	1	0	0	0	0	0	0	0	0
21ur-12035	0	0	0	0	0	0	0	0	0	0	0	0	1	0	0	0	0
21ur-12038	0	0	0	0	0	0	0	0	0	0	0	0	1	0	0	0	0
21ur-12039	0	0	0	0	0	0	0	0	1	0	0	0	0	0	0	0	1
21ur-1204	0	0	0	0	0	0	0	0	0	1	0	0	0	0	0	0	1
21ur-12040	0	0	0	0	0	0	2	0	1	0	0	0	1	0	0	0	0
21ur-1205	0	0	0	0	0	0	0	0	1	1	0	0	0	0	0	0	1
21ur-12053	0	0	0	0	0	1	2	1	1	0	0	0	0	0	0	0	0
21ur-12062	0	0	0	0	0	0	0	0	0	0	0	0	1	0	0	0	0
21ur-12064	2	0	0	0	0	0	0	0	0	0	0	0	1	0	0	0	0
21ur-1207	0	0	0	0	0	0	0	0	0	0	0	0	1	0	0	0	0
21ur-12071	0	0	0	1	0	0	0	0	0	0	0	1	0	0	0	0	0
21ur-12075	0	1	0	0	0	0	1	0	0	0	0	0	0	0	0	0	0
21ur-12078	0	0	0	0	0	2	0	0	1	1	0	0	1	0	0	0	0
21ur-12079	0	0	0	0	0	0	0	0	0	0	0	0	1	0	0	0	0
21ur-12080	1	0	6	3	1	3	4	2	0	0	3	2	2	0	2	0	5
21ur-12083	0	0	0	0	0	0	1	0	0	0	0	0	0	0	0	0	0
21ur-12094	0	0	0	0	0	0	0	0	0	2	0	0	0	0	0	0	0
21ur-12098	0	0	0	0	0	0	1	0	0	0	0	0	0	0	0	0	0
21ur-12101	0	0	0	0	0	0	0	0	0	1	0	0	0	0	0	0	0
21ur-12103	0	0	0	0	0	0	1	0	0	0	0	0	0	0	0	0	0
21ur-12105	2	0	0	1	0	0	1	1	0	0	0	0	0	0	0	0	0
21ur-12110	0	0	0	0	0	0	0	0	1	0	0	0	1	0	0	0	2
21ur-12118	0	0	0	0	0	0	0	1	0	0	0	0	1	0	0	0	0
21ur-12122	0	1	1	0	0	0	1	0	0	0	0	1	3	0	0	0	1
21ur-12125	0	0	0	0	0	0	0	0	0	1	0	0	0	0	0	0	0
21ur-1213	0	0	0	0	0	0	0	1	0	0	0	0	0	0	0	0	0
21ur-12131	0	0	0	0	0	0	0	0	0	0	0	0	1	0	0	0	0
21ur-12135	1	0	0	0	0	0	0	0	0	0	0	0	0	0	0	0	0
21ur-12137	0	0	0	0	0	0	0	0	0	0	0	1	0	0	0	0	0
21ur-1214	0	0	0	0	0	0	0	0	0	0	0	0	0	0	0	0	2
21ur-12145	0	0	0	0	0	0	0	0	0	0	0	0	3	0	0	0	0
21ur-12149	0	0	0	1	2	0	0	0	0	0	0	0	1	0	0	0	0
21ur-1215	0	0	0	0	0	0	0	0	0	0	0	0	1	0	0	0	0
21ur-12150	0	0	0	0	0	0	0	0	0	1	0	0	0	0	0	0	0
21ur-12156	0	0	0	0	0	0	1	0	0	0	0	0	0	0	0	0	0
21ur-12158	2	0	0	0	0	1	0	0	0	1	0	0	0	0	0	0	0
21ur-12159	0	0	0	0	0	0	0	0	0	0	0	1	0	0	0	0	0
21ur-12173	0	0	0	0	0	0	1	0	0	0	0	0	0	0	0	0	0
21ur-12174	0	0	1	0	0	0	2	1	0	1	0	1	1	1	0	0	1
21ur-12187	0	0	0	0	0	0	0	0	1	0	0	0	1	0	0	0	0
21ur-12188	0	0	0	2	0	0	0	0	0	0	0	1	1	0	0	0	0
21ur-12191	0	0	0	0	0	0	1	0	0	0	0	0	0	0	0	0	2
21ur-12194	0	0	0	0	0	0	0	0	0	2	0	2	0	0	0	0	0
21ur-12198	0	0	0	0	0	0	0	0	0	1	0	0	0	0	0	0	0
21ur-12199	0	0	0	2	0	0	0	0	0	0	0	0	0	0	0	0	1
21ur-122	0	0	0	0	0	0	0	0	0	1	0	0	0	0	0	0	0
21ur-1220	0	0	1	0	0	0	1	0	0	0	0	0	0	0	0	0	0
21ur-12202	0	0	0	0	0	0	1	0	0	0	0	0	0	0	0	0	1
21ur-12205	19	18	49	33	24	20	54	35	55	83	16	52	21	16	22	22	65
21ur-12207	0	0	0	0	0	0	0	0	0	0	0	0	3	0	0	0	0
21ur-12208	0	0	0	0	0	0	0	0	0	0	0	1	0	0	0	0	0
21ur-1221	1	1	0	0	1	2	0	0	0	0	0	0	1	0	0	0	0
21ur-12219	0	0	0	0	3	1	1	0	0	1	0	0	0	0	0	0	0
21ur-12221	0	0	0	0	0	0	0	0	0	1	0	0	0	0	0	0	0
21ur-12224	0	0	0	0	0	0	1	0	0	0	0	0	0	0	0	0	0
21ur-12225	0	0	3	0	2	1	5	1	3	1	0	0	2	0	0	0	0
21ur-12229	0	0	0	0	0	0	0	0	0	0	0	0	0	0	0	0	1
21ur-12234	2	0	0	1	0	0	0	0	0	2	0	1	1	0	0	0	0
21ur-12236	0	0	0	0	0	0	1	0	0	0	0	1	0	0	1	0	0
21ur-12237	0	0	0	0	0	0	0	0	0	2	0	1	0	0	0	1	1
21ur-12240	0	0	0	0	0	0	0	0	0	0	0	0	1	0	0	0	0
21ur-12242	0	0	0	0	0	0	1	0	0	0	0	0	0	0	0	0	0
21ur-12243	0	0	0	0	0	0	0	0	1	0	0	0	0	0	0	0	0
21ur-12245	0	0	0	0	0	0	0	0	0	0	0	0	1	0	0	0	0
21ur-12247	0	0	0	1	0	0	1	0	0	0	0	0	0	0	0	0	0
21ur-1225	0	0	0	0	0	0	0	0	0	1	0	0	0	0	0	0	0
21ur-12256	0	0	0	0	0	0	0	0	0	0	0	0	1	0	0	0	0
21ur-1226	0	0	0	0	0	0	0	0	0	1	0	0	0	0	0	0	0
21ur-12264	0	0	0	0	0	0	3	0	0	0	0	0	0	0	0	0	0
21ur-12267	0	0	1	1	3	0	2	2	0	1	1	0	0	0	0	1	2
21ur-12269	0	0	0	0	0	0	0	0	0	1	0	0	0	0	0	0	0
21ur-12271	0	0	0	0	0	0	0	0	0	0	0	0	0	0	0	0	2
21ur-12275	0	0	0	0	0	0	0	0	0	0	0	1	0	0	0	0	0
21ur-12279	1	0	7	2	4	10	13	6	6	5	5	3	0	3	1	3	6
21ur-12280	0	0	0	0	0	0	1	0	0	0	0	0	0	0	0	0	0
21ur-12284	0	0	1	0	0	1	0	0	0	0	0	1	0	0	0	0	0
21ur-12285	0	0	0	0	0	0	0	0	2	0	0	0	0	0	0	0	0
21ur-12288	0	0	0	0	0	0	0	0	2	0	0	0	0	0	0	0	0
21ur-1229	0	0	0	1	1	0	6	1	0	1	0	0	0	2	0	0	0
21ur-12294	0	0	0	0	0	0	0	0	0	0	0	0	2	0	0	0	0
21ur-12295	1	0	0	0	0	0	0	0	0	0	0	0	0	0	0	0	0
21ur-123	1	0	0	0	0	0	0	0	0	0	0	0	0	0	0	0	0
21ur-1230	0	0	0	0	0	0	0	0	0	0	0	0	1	0	0	0	0
21ur-12300	0	0	0	0	0	0	0	0	0	0	0	0	1	0	0	0	0
21ur-12301	0	1	3	1	1	0	1	2	0	0	1	1	0	0	0	0	2
21ur-12311	2	0	0	0	0	0	0	0	0	0	0	0	0	0	0	0	0
21ur-12312	0	1	0	0	0	0	0	0	0	1	0	0	0	0	0	0	0
21ur-12313	0	0	0	0	0	0	0	0	0	1	0	0	0	0	0	0	0
21ur-12314	0	0	0	0	0	0	0	0	1	0	0	0	0	0	0	0	1
21ur-12318	0	0	0	0	0	0	0	0	0	1	0	0	0	0	0	0	0
21ur-12321	0	0	0	0	0	0	0	0	0	0	0	0	2	0	0	0	1
21ur-12323	0	0	0	0	0	0	0	0	0	1	0	0	0	0	0	0	0
21ur-12325	1	0	0	0	0	0	0	0	0	0	0	0	0	0	0	0	1
21ur-12327	0	0	0	0	0	0	2	0	0	1	0	0	2	0	1	0	1
21ur-12330	0	0	0	0	0	0	0	0	0	1	0	0	0	0	0	0	0
21ur-12331	0	0	0	0	0	0	0	0	1	0	0	0	0	0	0	0	0
21ur-12336	0	0	0	0	1	1	3	2	0	1	0	0	0	0	0	0	1
21ur-12337	0	0	2	0	0	0	1	0	0	0	0	0	0	0	0	0	0
21ur-12339	0	0	1	0	0	1	3	0	1	0	0	1	1	0	0	0	3
21ur-12341	0	0	0	0	0	0	0	0	1	0	0	0	0	0	0	0	0
21ur-12346	0	0	0	0	0	0	1	0	0	0	0	0	0	0	0	0	0
21ur-12347	0	0	0	0	0	0	1	0	0	0	0	0	0	0	0	0	0
21ur-12348	0	0	0	0	0	0	0	0	0	0	0	0	1	0	0	0	0
21ur-12364	2	1	7	10	3	1	12	7	11	7	4	16	5	1	1	0	11
21ur-12369	0	0	0	0	0	0	0	0	0	1	0	0	0	0	0	0	0
21ur-12374	0	0	0	0	0	1	0	0	0	0	0	0	1	0	0	0	0
21ur-12377	0	0	0	0	0	0	0	0	1	0	0	0	0	0	0	0	0
21ur-1238	0	0	0	0	0	0	0	0	0	0	0	0	0	0	0	0	1
21ur-12382	0	0	0	0	0	0	0	0	0	1	0	0	0	0	0	0	1
21ur-12386	0	0	0	0	1	2	1	1	1	3	0	0	0	0	0	0	0
21ur-12391	0	0	0	0	0	0	0	0	0	0	0	0	1	0	0	0	0
21ur-12395	0	0	0	0	0	0	0	0	0	0	0	0	0	0	0	0	2
21ur-1240	0	0	0	0	0	0	0	0	0	1	0	0	0	0	0	0	1
21ur-12401	0	0	0	0	0	0	0	0	0	0	0	0	0	0	0	0	1
21ur-12404	0	0	0	0	0	0	2	0	0	0	0	0	0	0	0	0	1
21ur-12407	0	0	0	1	0	0	0	0	0	1	0	0	0	1	0	0	0
21ur-12411	2	1	11	1	0	2	4	3	9	2	1	4	5	1	1	0	2
21ur-12418	0	1	0	0	0	3	3	3	0	1	0	1	0	0	0	0	0
21ur-12430	1	0	0	0	0	0	0	0	0	0	0	0	0	0	0	0	0
21ur-12431	2	0	0	0	0	0	0	0	0	0	0	0	0	0	0	0	0
21ur-12432	0	0	0	0	0	0	1	0	0	1	0	0	0	0	0	0	0
21ur-1244	0	0	0	0	0	0	1	0	0	0	0	0	1	0	0	0	1
21ur-12442	0	0	0	0	2	0	0	1	0	0	0	0	0	0	0	0	0
21ur-12452	0	0	0	0	0	0	1	1	0	0	0	0	0	0	0	0	0
21ur-12454	0	0	0	0	0	0	0	0	0	1	0	0	0	0	0	0	0
21ur-12462	0	0	0	0	0	0	0	0	0	1	0	0	0	0	0	0	0
21ur-12463	0	0	0	0	0	0	1	0	0	0	0	0	1	0	0	0	0
21ur-12465	2	2	3	2	2	3	5	3	15	16	2	1	3	4	1	2	7
21ur-12466	0	0	0	1	0	0	0	0	3	0	0	0	0	0	0	0	0
21ur-12468	0	0	0	0	1	0	5	3	2	0	0	0	1	0	0	0	0
21ur-1247	0	0	0	0	0	0	1	0	0	0	0	0	1	0	0	0	0
21ur-12478	0	0	0	1	0	0	0	0	0	0	0	0	1	0	0	0	0
21ur-1248	0	0	0	0	0	0	2	0	0	2	0	0	0	0	0	0	1
21ur-12490	0	0	0	0	0	0	0	0	0	1	0	0	0	0	0	0	0
21ur-12499	0	2	7	2	2	2	1	1	10	12	2	6	2	2	5	3	15
21ur-125	0	0	0	0	0	0	0	0	0	0	0	0	0	0	0	2	0
21ur-12501	1	0	0	0	0	0	0	0	0	0	0	0	0	0	0	0	0
21ur-1251	0	0	0	0	0	0	0	0	0	0	0	0	0	2	0	0	0
21ur-12511	0	0	0	0	0	0	0	0	0	1	0	0	0	0	0	0	0
21ur-12519	0	0	0	0	0	0	0	0	0	0	0	0	2	0	0	0	1
21ur-1252	0	0	0	0	0	0	4	0	1	0	0	0	1	0	0	0	0
21ur-12520	0	0	0	0	0	0	0	0	0	0	0	0	1	0	0	0	0
21ur-12529	0	0	0	0	1	0	0	0	0	1	0	0	0	0	0	0	0
21ur-1253	0	0	0	0	0	0	0	0	0	0	0	1	1	0	0	0	0
21ur-12533	0	1	0	0	0	0	0	0	0	0	0	0	0	0	0	0	0
21ur-12535	0	0	0	0	0	0	0	0	0	1	0	0	0	0	0	0	1
21ur-12538	0	0	0	0	0	0	2	0	0	0	0	1	0	0	0	0	0
21ur-1254	0	0	0	0	0	0	0	0	0	2	0	1	0	0	0	0	0
21ur-12544	0	0	1	0	0	0	1	0	0	0	0	0	0	0	0	0	0
21ur-12547	2	0	0	0	0	0	0	0	0	0	0	0	0	0	0	0	0
21ur-12551	0	1	0	0	0	3	2	0	0	0	0	1	1	0	0	0	0
21ur-12555	1	0	0	0	0	0	0	0	0	0	0	0	0	0	0	0	1
21ur-12556	12	11	77	25	5	20	16	8	31	30	10	25	20	24	25	9	57
21ur-12558	0	0	0	0	1	0	1	0	2	3	0	0	1	0	0	0	0
21ur-12559	0	1	0	0	0	0	0	1	0	0	0	0	0	0	0	0	2
21ur-12561	0	0	0	0	0	0	0	0	0	2	0	0	1	0	0	0	0
21ur-12566	0	0	0	0	0	0	0	0	0	1	0	0	2	0	0	0	0
21ur-12572	4	2	8	8	3	4	2	1	12	9	5	6	1	3	0	5	23
21ur-1258	1	0	0	0	0	0	0	0	0	0	0	0	0	0	0	0	0
21ur-12580	0	0	0	0	0	0	0	0	0	1	0	0	0	0	0	0	1
21ur-12585	0	0	0	0	1	0	0	0	1	0	0	0	1	0	0	0	1
21ur-12587	0	0	0	0	0	1	0	0	0	0	0	0	1	0	0	0	0
21ur-12593	0	0	0	0	0	0	0	0	0	0	0	0	1	0	0	0	0
21ur-12595	0	0	4	2	0	1	0	0	0	0	0	1	0	0	1	0	1
21ur-12599	0	0	0	0	0	0	0	0	0	0	0	2	0	0	0	0	0
21ur-126	0	0	0	0	0	0	4	0	1	0	0	0	0	0	0	0	0
21ur-1260	0	0	0	1	0	0	0	0	0	0	0	0	0	0	0	0	0
21ur-12605	0	0	0	0	0	0	0	0	0	0	0	0	1	0	0	0	0
21ur-12607	0	0	0	0	0	0	0	0	0	0	0	0	1	0	0	0	0
21ur-12608	0	0	0	0	0	0	0	0	0	0	0	0	1	0	0	0	0
21ur-12610	0	0	0	0	0	0	4	0	0	1	0	0	0	0	0	0	0
21ur-12612	0	0	0	0	0	0	2	0	0	1	0	0	0	0	0	0	0
21ur-12614	0	0	0	0	0	0	0	0	0	2	0	0	0	0	0	0	1
21ur-12616	0	0	0	0	0	0	0	0	1	0	0	0	0	0	0	0	0
21ur-12620	0	0	0	0	0	0	0	0	0	0	0	0	2	0	0	0	0
21ur-12626	2	0	0	0	0	0	0	0	0	2	0	0	0	0	0	0	0
21ur-12627	0	0	0	0	0	0	0	0	0	0	0	0	1	0	0	0	0
21ur-12633	0	0	0	0	0	0	0	0	0	0	1	0	1	0	0	0	0
21ur-12639	0	0	0	0	0	0	0	0	0	3	0	0	0	0	0	0	0
21ur-12646	0	0	0	0	0	0	0	0	0	0	0	0	1	0	0	0	1
21ur-12651	1	0	0	0	0	0	1	0	0	0	0	0	0	0	0	0	0
21ur-12658	0	0	0	0	0	0	0	0	0	0	0	0	1	0	0	0	0
21ur-12662	0	0	0	0	0	0	2	2	0	0	0	0	0	0	0	0	1
21ur-12672	1	0	0	2	0	1	1	0	0	3	0	1	1	0	0	0	0
21ur-12673	0	1	1	0	2	0	2	1	0	1	0	0	0	0	0	0	0
21ur-12680	0	0	0	0	0	0	0	1	0	0	0	0	0	0	0	0	0
21ur-12687	0	0	0	0	0	1	0	0	0	0	0	0	1	0	0	0	0
21ur-12688	0	0	0	0	0	0	0	0	0	0	1	0	0	0	0	0	0
21ur-12689	0	0	0	0	0	0	0	0	0	0	0	0	0	0	0	0	1
21ur-12694	0	0	0	0	0	0	0	0	0	0	0	0	2	0	1	0	2
21ur-12719	0	0	0	1	0	0	0	0	0	0	0	0	0	0	0	0	1
21ur-12725	0	0	0	0	0	0	1	0	0	0	0	0	0	0	1	0	0
21ur-12729	2	0	1	0	0	0	2	0	0	0	0	0	0	0	0	0	1
21ur-1273	1	0	0	0	0	0	0	0	3	0	0	0	0	0	0	0	0
21ur-12730	0	1	1	0	2	0	2	0	2	0	1	0	0	0	0	1	0
21ur-12732	0	0	0	0	0	0	0	0	0	0	0	0	0	0	0	0	3
21ur-12735	0	1	0	0	0	0	1	0	0	1	0	0	1	0	0	0	0
21ur-12745	0	0	0	0	0	1	0	0	0	0	0	0	0	0	0	0	0
21ur-12747	0	0	0	0	0	0	0	0	0	1	0	0	0	0	0	0	0
21ur-12753	0	0	0	0	0	0	2	0	0	0	0	0	0	0	0	0	0
21ur-12755	0	0	0	0	0	0	0	0	0	0	0	0	1	0	0	0	0
21ur-12756	86	76	262	172	122	169	204	136	246	223	108	272	95	108	139	115	256
21ur-12757	0	0	0	0	0	0	0	1	0	0	0	0	1	0	0	0	0
21ur-12759	0	0	0	0	0	0	0	0	0	0	0	0	1	0	0	0	0
21ur-1276	0	0	0	0	0	0	0	0	0	0	0	0	1	0	0	0	0
21ur-12762	0	0	0	0	0	1	0	0	0	1	0	0	1	0	0	0	0
21ur-12763	2	0	0	0	0	0	0	0	0	1	0	0	0	0	0	0	0
21ur-12777	0	0	0	0	0	0	0	0	0	0	0	0	1	0	0	0	0
21ur-1278	0	0	0	0	0	0	0	0	0	1	0	0	0	0	1	0	0
21ur-12780	0	0	0	0	0	0	0	0	0	0	0	0	0	0	0	0	1
21ur-12791	0	0	0	0	1	0	0	0	0	0	0	1	0	0	0	0	0
21ur-12798	0	0	0	0	0	0	0	0	0	0	0	2	0	0	0	0	0
21ur-128	1	0	8	2	6	11	3	3	14	7	1	2	2	0	0	0	2
21ur-1280	0	0	0	0	0	0	0	0	1	0	0	0	0	0	0	0	0
21ur-12807	0	0	0	1	0	0	0	2	2	1	0	0	6	0	1	1	2
21ur-12808	0	1	1	0	0	0	0	0	0	0	0	0	0	0	0	0	0
21ur-12809	2	0	0	0	0	0	0	0	0	0	0	0	0	0	0	0	0
21ur-12811	0	0	0	0	0	0	1	0	0	0	0	0	0	0	0	0	0
21ur-12812	0	0	1	0	0	0	0	0	0	0	0	0	0	0	0	0	0
21ur-12813	0	0	0	0	0	0	0	0	0	0	0	0	0	0	1	0	0
21ur-12815	0	0	0	0	0	0	1	0	1	0	0	0	0	0	0	0	0
21ur-12821	0	0	0	0	0	0	2	0	0	0	0	0	1	0	0	0	0
21ur-12823	0	0	0	0	0	1	1	0	0	0	0	0	0	0	0	0	0
21ur-12825	2	0	0	0	0	0	0	1	0	0	0	0	0	0	0	0	0
21ur-12827	0	0	0	1	0	0	0	0	0	0	0	0	0	0	0	0	0
21ur-1283	1	0	0	0	0	0	1	0	0	0	0	0	0	0	0	0	0
21ur-12830	16	11	67	40	28	42	70	43	82	83	17	50	19	19	26	18	40
21ur-12831	0	0	0	0	0	0	1	0	0	0	0	0	0	0	0	0	0
21ur-12835	0	0	1	0	1	1	1	0	0	3	0	1	0	1	0	0	0
21ur-1284	0	0	0	0	0	0	0	0	0	0	0	0	1	0	0	0	0
21ur-12841	0	0	0	0	0	0	1	0	0	0	0	0	0	0	0	0	0
21ur-1285	1	0	0	0	0	0	0	0	0	0	0	0	0	0	0	0	0
21ur-12851	0	0	0	0	0	0	1	0	0	0	0	0	0	0	0	0	0
21ur-12856	0	0	0	0	0	0	0	0	0	0	0	1	0	0	0	0	0
21ur-12866	0	0	0	0	0	1	0	0	0	0	0	1	0	0	0	0	0
21ur-12876	0	0	0	0	0	0	1	0	0	0	0	0	0	0	0	0	0
21ur-12877	0	0	0	0	0	0	0	0	0	0	0	0	0	0	0	0	1
21ur-12887	0	0	0	0	0	0	0	0	0	2	0	0	1	0	0	0	0
21ur-12906	0	0	0	0	0	0	0	0	0	1	0	0	1	2	0	0	0
21ur-12913	0	0	0	0	0	0	1	0	1	0	0	0	0	0	0	0	0
21ur-12917	0	0	0	0	0	0	0	0	0	0	0	0	2	0	0	0	0
21ur-12934	1	0	0	0	0	0	0	0	0	0	0	0	1	0	0	0	1
21ur-12937	0	0	0	0	2	4	1	0	0	2	0	0	0	0	0	0	0
21ur-12943	0	0	0	0	0	0	1	0	0	1	0	0	0	0	0	0	0
21ur-12944	1	0	0	1	0	0	0	0	0	1	0	1	0	0	0	0	0
21ur-12945	0	0	2	0	0	0	0	1	0	1	0	0	0	0	0	0	0
21ur-12946	0	0	0	0	0	0	0	0	0	0	0	0	1	0	0	0	0
21ur-12950	0	0	0	0	0	0	0	0	0	1	0	0	0	0	0	0	0
21ur-12951	0	0	0	0	0	0	1	0	0	1	0	0	0	0	0	0	1
21ur-12952	0	0	0	0	0	0	2	0	1	0	0	0	0	0	0	1	0
21ur-1296	0	0	0	0	1	0	1	0	0	2	0	0	0	0	0	0	0
21ur-12968	0	0	0	0	0	0	0	0	0	0	0	0	1	0	0	0	2
21ur-1297	0	0	0	0	0	0	0	0	0	0	0	0	1	0	0	0	0
21ur-12970	0	0	0	0	0	0	0	0	0	0	0	0	1	0	0	0	0
21ur-12978	1	0	0	0	0	0	0	0	0	0	0	0	0	0	0	0	0
21ur-12979	0	0	0	0	0	0	2	0	0	0	0	0	0	0	0	0	0
21ur-12980	0	0	0	0	0	0	0	0	0	0	0	0	2	0	0	0	1
21ur-12983	0	0	0	0	0	0	0	0	0	1	0	0	0	0	0	0	0
21ur-12984	0	0	0	0	0	0	1	0	2	0	0	0	0	0	0	0	0
21ur-12986	2	0	0	0	0	0	0	1	0	0	0	0	0	0	0	0	0
21ur-12990	0	0	0	0	0	0	0	0	1	0	0	0	0	0	0	0	0
21ur-12996	2	2	9	4	3	3	4	1	14	11	2	10	7	7	7	1	3
21ur-12998	0	0	0	0	0	0	1	0	0	0	0	0	0	0	0	0	0
21ur-130	0	1	0	0	2	3	1	1	0	3	0	0	0	0	0	0	1
21ur-1300	0	0	0	0	0	0	0	0	0	0	0	0	0	0	0	0	2
21ur-13001	0	0	0	0	0	0	0	0	0	1	0	0	1	0	0	0	0
21ur-13005	0	0	0	0	0	1	0	0	1	0	0	0	1	0	0	0	0
21ur-1301	0	0	2	0	0	0	0	0	0	0	0	0	1	0	0	0	0
21ur-13013	0	0	0	0	0	0	0	0	1	0	0	0	0	0	0	0	0
21ur-13017	0	0	1	0	0	0	0	0	2	0	0	0	0	0	0	0	0
21ur-1302	0	0	1	0	0	0	2	1	0	2	0	0	0	0	2	1	0
21ur-13032	0	0	0	0	2	1	0	0	1	0	1	0	1	0	1	1	0
21ur-13033	0	0	0	0	0	0	0	0	0	0	0	2	0	0	0	0	0
21ur-13034	0	0	0	0	1	0	1	0	2	3	0	0	0	0	0	0	0
21ur-13040	0	0	0	0	0	0	0	0	2	0	0	0	0	0	0	0	0
21ur-13044	1	0	0	0	0	0	0	0	0	0	0	0	0	0	1	0	0
21ur-13047	0	0	0	0	0	0	2	0	0	0	0	0	0	0	0	0	0
21ur-13051	0	0	1	0	0	0	0	0	0	0	0	0	1	0	0	0	0
21ur-13054	3	2	15	4	8	5	9	6	9	3	2	4	2	5	2	1	9
21ur-13062	0	0	0	0	1	0	0	0	0	0	0	0	1	0	0	0	0
21ur-13077	1	0	0	0	0	0	0	0	0	0	0	0	0	0	0	0	0
21ur-13084	0	0	0	0	0	0	2	0	0	0	0	0	1	0	0	0	0
21ur-13088	3	0	1	0	0	0	0	1	1	0	0	2	0	0	1	0	2
21ur-1309	0	0	0	0	0	0	0	0	0	0	0	0	1	0	0	0	0
21ur-13096	0	0	0	0	0	0	0	0	0	1	0	0	0	0	0	0	0
21ur-131	0	0	0	0	0	0	0	0	0	0	1	0	0	0	0	0	0
21ur-13104	0	0	0	0	0	1	0	0	0	0	0	0	0	0	0	0	0
21ur-13107	0	0	0	0	0	0	0	0	0	0	0	0	2	0	0	0	0
21ur-13109	0	0	2	0	0	3	0	0	2	0	0	0	0	0	0	0	0
21ur-1311	0	0	0	0	0	0	1	0	0	0	0	0	1	0	0	0	0
21ur-13111	0	1	0	0	0	0	0	0	0	0	0	0	0	0	0	0	0
21ur-13116	0	0	0	0	0	0	0	0	0	0	0	0	1	0	0	0	0
21ur-13117	0	0	0	0	1	0	0	0	0	0	0	0	0	0	0	0	0
21ur-1312	0	0	0	0	0	0	0	0	0	1	0	0	0	0	0	0	0
21ur-13120	0	0	0	0	1	0	0	0	0	0	0	0	0	0	0	0	0
21ur-13121	0	0	0	0	0	1	1	2	0	1	0	2	1	0	0	0	0
21ur-13128	0	0	0	0	0	0	0	0	0	0	0	1	0	0	0	0	0
21ur-13135	0	0	0	0	0	0	0	0	0	1	0	0	0	0	0	0	0
21ur-13136	0	0	0	0	1	0	0	0	0	0	0	1	0	0	0	0	0
21ur-13137	0	1	0	0	0	0	0	0	1	0	0	2	0	0	0	0	0
21ur-13138	0	0	0	0	0	0	0	0	0	0	0	0	0	0	0	0	1
21ur-13144	0	0	0	0	0	0	0	1	0	0	0	0	0	0	0	0	0
21ur-13147	0	0	0	0	0	1	0	1	0	0	0	0	2	0	1	0	0
21ur-1315	1	0	0	0	0	0	0	0	0	0	0	0	0	0	0	0	0
21ur-13152	0	0	0	0	0	0	0	0	0	0	0	0	1	0	0	0	0
21ur-13156	0	1	0	0	0	0	0	0	0	0	0	0	1	0	0	0	0
21ur-1316	0	0	0	0	0	0	0	0	0	0	0	0	1	0	0	0	0
21ur-13163	0	0	0	0	0	1	2	0	0	0	0	0	0	0	0	0	0
21ur-13164	4	0	0	0	0	0	0	0	0	0	0	0	0	0	0	0	3
21ur-13165	0	0	0	0	4	1	3	1	0	0	0	0	0	0	0	0	0
21ur-13168	0	0	1	0	0	0	1	0	0	0	0	1	0	0	2	0	1
21ur-1317	0	0	0	0	0	0	1	0	0	0	0	0	0	0	0	0	0
21ur-13175	0	0	1	0	0	0	0	1	0	0	0	0	1	0	0	0	3
21ur-13177	1	0	2	2	0	0	1	0	2	0	0	2	1	0	0	1	0
21ur-13179	0	0	0	0	0	0	0	0	0	0	0	0	1	0	0	0	1
21ur-1318	0	0	0	0	0	0	0	0	0	1	0	0	0	0	0	0	0
21ur-13188	0	0	0	0	0	0	2	0	0	0	0	0	0	0	0	0	0
21ur-13189	0	0	0	0	0	0	0	0	0	1	0	0	0	0	0	0	0
21ur-13197	0	0	0	0	0	0	0	0	0	0	0	0	2	0	0	0	0
21ur-13198	5	1	0	4	0	0	2	0	2	3	0	0	0	2	0	0	1
21ur-13200	0	0	0	0	0	0	2	0	0	0	0	0	1	0	0	0	0
21ur-13201	0	0	0	0	0	0	0	0	0	0	0	0	0	0	0	0	1
21ur-13203	0	0	0	0	0	0	0	0	0	1	0	0	0	0	0	0	0
21ur-13207	0	0	0	0	0	0	0	0	0	0	0	1	0	0	0	0	0
21ur-1321	0	0	1	1	0	0	0	0	0	0	0	0	0	0	0	0	0
21ur-13212	0	0	2	3	0	0	1	0	0	0	0	0	0	0	0	0	1
21ur-13213	0	0	0	2	0	0	1	0	0	0	1	1	0	0	0	0	1
21ur-13214	0	0	0	0	0	0	0	0	0	0	0	0	0	0	0	0	2
21ur-13215	9	3	18	6	47	54	52	27	60	60	2	6	2	1	1	0	2
21ur-13217	0	0	0	0	0	0	0	0	2	0	0	0	0	0	1	0	0
21ur-13220	0	0	0	0	0	0	0	0	0	0	0	0	1	0	0	0	0
21ur-13227	0	0	2	0	0	0	0	2	3	1	0	1	1	1	0	1	0
21ur-13232	0	0	1	0	0	0	2	2	1	0	0	4	0	0	0	0	0
21ur-13237	0	0	0	0	0	0	0	0	0	1	0	0	1	0	0	0	1
21ur-13239	0	0	0	0	0	0	0	1	0	0	0	0	0	0	0	0	0
21ur-1325	0	0	0	0	0	0	0	0	0	1	0	0	0	0	0	0	0
21ur-13251	1	0	0	1	0	0	1	0	1	2	0	0	0	0	0	0	0
21ur-1326	0	0	0	0	0	0	1	0	0	0	0	0	0	0	0	0	0
21ur-13267	0	0	0	0	1	0	0	0	1	1	0	2	0	0	0	0	0
21ur-13282	0	0	0	0	0	0	0	0	0	4	0	0	0	0	0	0	0
21ur-13286	0	0	0	1	0	0	1	0	0	0	0	0	0	0	0	0	0
21ur-13298	0	0	1	0	0	0	0	0	1	0	0	0	0	0	0	0	0
21ur-133	1	0	0	0	0	0	0	0	0	0	0	0	0	0	0	0	0
21ur-13300	0	0	0	0	0	0	0	0	0	1	0	0	0	0	0	0	0
21ur-13301	0	0	5	2	1	0	3	1	2	0	0	5	2	4	2	1	6
21ur-13302	0	0	0	0	0	0	0	0	0	0	0	0	1	0	0	0	2
21ur-13307	0	0	0	0	0	2	1	0	0	0	0	0	1	0	0	0	0
21ur-13313	0	0	0	1	0	0	0	0	1	3	0	0	0	0	0	0	0
21ur-13314	3	0	0	0	0	0	0	0	0	0	0	0	0	0	0	0	0
21ur-13318	0	0	0	0	0	0	1	0	0	0	0	0	0	0	0	0	0
21ur-13319	0	0	0	0	0	0	0	0	0	1	0	1	0	1	0	0	0
21ur-13323	0	0	0	0	0	0	0	0	0	0	0	0	0	0	0	0	1
21ur-13325	0	0	0	0	0	1	0	0	0	0	0	0	0	0	0	0	0
21ur-13327	0	0	0	0	0	0	0	0	0	1	1	1	0	0	2	0	0
21ur-1333	0	0	3	0	0	0	0	0	0	0	0	0	1	0	0	0	0
21ur-13330	0	0	0	0	0	0	0	0	0	0	0	1	0	0	0	0	0
21ur-13334	0	0	0	0	0	0	0	0	0	0	0	0	0	0	0	0	1
21ur-1334	0	0	0	0	4	3	10	1	0	3	0	1	0	0	2	0	0
21ur-13344	1	0	0	0	0	0	0	0	0	0	0	0	0	0	0	0	0
21ur-13349	0	0	0	0	0	0	0	0	0	1	0	0	0	0	0	0	0
21ur-13351	0	0	0	0	0	0	0	0	0	0	0	1	0	0	0	0	0
21ur-13355	0	0	0	0	0	0	2	0	0	0	0	0	0	0	0	0	0
21ur-13356	0	0	0	0	0	0	0	0	0	0	0	0	0	0	0	0	1
21ur-1336	0	0	0	0	0	0	2	0	0	0	0	0	1	0	0	0	0
21ur-13368	1	0	0	0	1	2	2	1	0	1	2	1	0	0	0	0	0
21ur-1337	0	0	0	0	0	0	0	0	0	0	0	0	0	1	0	0	0
21ur-13373	1	1	1	1	0	0	0	0	1	0	0	0	0	0	0	0	0
21ur-1338	0	0	0	3	0	1	0	0	0	0	0	0	0	0	0	0	0
21ur-13380	0	0	0	0	0	0	0	0	0	0	0	0	1	0	0	0	0
21ur-13384	0	0	0	0	0	0	0	0	2	0	0	0	0	0	0	0	0
21ur-13391	0	0	0	0	0	0	4	0	0	0	0	0	1	0	0	0	0
21ur-13394	1	0	0	0	0	0	0	0	0	0	0	0	0	0	0	0	0
21ur-13395	0	1	2	0	0	0	0	0	0	0	0	0	0	0	0	0	0
21ur-1340	0	0	0	0	0	0	0	0	0	0	0	0	1	0	0	0	0
21ur-13424	1	0	0	0	1	0	3	1	1	0	0	0	0	0	0	0	0
21ur-13430	0	0	0	0	0	0	1	0	0	0	0	0	0	0	0	0	0
21ur-13431	0	0	2	1	0	0	0	0	1	0	0	0	0	0	0	0	0
21ur-13435	1	0	0	0	0	0	0	0	0	0	0	0	1	0	0	0	0
21ur-13445	0	0	0	0	0	0	0	0	0	3	0	0	0	0	0	0	0
21ur-13446	0	0	0	0	0	0	0	0	0	1	0	0	0	0	0	0	0
21ur-13448	0	0	1	0	0	0	0	0	0	0	0	0	1	0	0	0	0
21ur-13456	0	0	4	0	0	0	0	0	0	0	0	0	1	0	0	0	0
21ur-13461	0	0	0	0	0	0	0	0	0	0	0	0	1	0	0	0	0
21ur-13465	0	0	0	0	0	0	0	0	0	0	0	0	1	0	0	0	0
21ur-13468	2	0	4	0	0	2	0	0	5	4	0	1	0	1	3	0	3
21ur-13469	1	0	1	0	0	0	0	0	0	0	0	0	0	0	0	0	0
21ur-13471	0	2	0	0	0	0	0	0	0	0	0	0	0	0	0	0	0
21ur-13473	0	0	0	0	0	0	0	0	0	0	0	0	1	0	0	0	0
21ur-13475	1	0	0	0	0	0	0	0	0	0	0	0	0	0	0	0	0
21ur-13476	0	0	1	0	0	0	0	0	0	0	0	0	0	0	0	0	0
21ur-13483	0	0	0	1	0	0	0	0	0	0	0	0	0	0	0	0	0
21ur-13484	0	0	0	0	0	0	0	0	0	1	0	0	0	0	0	0	0
21ur-13486	0	0	1	0	0	0	0	0	0	0	0	0	0	0	0	0	1
21ur-135	0	0	0	2	0	0	0	0	0	1	0	0	0	0	0	0	0
21ur-1350	0	0	0	0	0	0	0	0	0	0	0	1	0	0	0	0	0
21ur-13501	0	0	0	0	0	2	0	0	0	0	0	0	0	0	0	0	0
21ur-13504	0	0	0	0	0	0	0	0	1	0	0	0	0	0	0	0	0
21ur-13505	0	0	0	0	0	0	1	0	0	0	0	0	0	0	0	0	0
21ur-13508	1	0	0	0	0	0	1	0	0	3	0	0	0	0	0	0	2
21ur-13509	1	0	0	0	0	0	0	0	0	1	0	0	0	0	0	0	0
21ur-13510	0	0	0	0	0	0	0	0	0	0	0	0	1	0	0	0	0
21ur-13515	2	1	4	0	6	7	4	5	7	9	1	3	1	0	0	1	5
21ur-13521	1	0	0	0	0	0	0	0	0	0	0	0	0	0	0	0	0
21ur-13522	1	0	0	1	0	0	0	0	0	0	0	0	0	0	0	0	0
21ur-13526	0	0	0	0	0	0	0	0	0	0	0	0	0	0	0	0	1
21ur-1353	0	0	0	0	0	0	0	0	0	1	0	0	1	0	0	0	0
21ur-13530	0	0	0	0	0	0	0	0	0	0	0	0	0	0	0	0	2
21ur-13532	1	0	0	0	0	1	0	0	0	0	0	0	0	0	0	0	0
21ur-13535	0	0	0	0	0	0	0	0	0	0	1	0	0	0	0	0	0
21ur-13536	0	0	0	0	0	0	2	0	0	0	0	0	1	0	0	0	0
21ur-13538	2	0	0	0	0	0	0	0	0	2	0	0	0	0	0	0	0
21ur-13539	1	0	0	0	0	0	0	0	0	0	0	0	0	0	0	0	0
21ur-1354	13	6	41	18	13	13	18	11	21	28	8	32	8	8	18	8	28
21ur-13547	1	0	0	0	0	0	0	0	0	0	0	0	0	0	0	0	0
21ur-13549	0	0	3	1	0	0	0	0	0	1	0	0	0	0	0	0	0
21ur-1356	0	0	0	0	0	0	0	0	0	1	0	0	0	0	0	0	0
21ur-13561	9	1	2	2	1	2	3	1	3	0	1	1	2	1	1	1	3
21ur-13562	1	0	0	0	0	0	0	0	1	0	0	0	0	0	0	0	0
21ur-13563	0	0	0	0	1	0	3	0	2	0	0	0	0	0	0	0	0
21ur-13564	0	1	3	3	2	0	0	0	0	0	0	0	0	0	0	0	0
21ur-13565	0	0	0	0	1	0	2	0	1	0	2	4	0	0	2	1	4
21ur-1357	2	1	0	0	0	0	1	0	0	0	0	0	0	0	0	0	2
21ur-13572	0	0	2	0	0	0	0	0	0	0	0	0	1	0	0	0	0
21ur-1359	0	0	0	0	2	0	1	0	1	0	0	0	0	0	0	0	0
21ur-13590	1	0	0	0	1	0	2	2	0	0	0	0	0	0	0	1	2
21ur-13594	0	0	1	0	0	0	0	0	0	0	0	0	0	0	0	0	0
21ur-13596	0	0	0	0	0	0	0	0	0	1	0	0	0	0	0	0	0
21ur-13597	0	0	0	0	0	0	0	0	0	0	0	0	0	0	0	0	1
21ur-1360	0	0	0	0	1	0	0	0	0	0	0	0	1	0	0	0	0
21ur-13600	0	0	0	0	0	0	1	0	0	2	0	0	2	0	0	0	0
21ur-13601	1	0	1	1	2	0	0	0	0	0	0	0	0	0	0	0	0
21ur-13607	0	0	0	0	0	0	1	0	0	0	0	0	0	0	0	0	0
21ur-13608	0	0	0	0	0	0	0	0	0	1	0	0	1	0	0	0	1
21ur-13611	0	0	0	0	0	0	0	1	0	0	0	0	0	0	0	0	0
21ur-13615	0	0	0	0	2	0	0	0	0	1	0	2	0	0	0	0	0
21ur-13616	0	0	0	0	0	0	0	0	0	0	0	1	0	0	0	0	0
21ur-13626	0	0	0	0	1	0	0	0	0	0	0	0	0	0	0	0	0
21ur-13628	0	0	0	0	0	0	1	0	0	0	0	0	0	0	0	0	0
21ur-13629	0	0	0	0	0	0	0	0	0	0	0	1	0	0	0	0	0
21ur-1363	0	0	0	0	0	0	0	0	1	4	0	0	1	0	0	0	0
21ur-13631	0	0	0	0	0	0	0	0	0	0	0	0	0	0	0	0	2
21ur-13643	0	0	0	0	0	0	1	0	0	0	0	0	0	0	0	2	0
21ur-13654	1	0	0	0	0	0	0	0	0	0	0	0	0	0	0	0	0
21ur-13655	0	0	0	0	0	0	0	0	0	0	1	0	0	0	0	0	0
21ur-13656	0	0	0	0	0	0	0	1	0	0	0	0	0	0	0	0	0
21ur-13659	0	0	0	0	0	0	0	0	0	1	0	1	0	0	0	1	0
21ur-13664	1	0	0	0	0	0	0	0	0	0	0	0	0	0	0	0	0
21ur-13670	0	0	0	0	1	2	3	4	2	2	0	3	0	0	0	2	0
21ur-13674	0	0	0	0	0	0	0	0	0	1	0	0	0	0	0	0	0
21ur-13675	1	0	0	0	0	0	0	0	0	1	0	0	0	0	0	0	0
21ur-13676	0	0	0	0	0	0	2	0	0	0	0	0	2	0	0	0	0
21ur-13677	0	0	0	0	0	0	0	0	0	0	3	0	1	0	1	0	0
21ur-13678	0	0	0	1	0	2	1	2	0	1	0	0	1	0	0	0	0
21ur-13686	0	1	0	0	13	7	9	4	5	8	0	1	0	0	0	0	0
21ur-13688	8	6	7	3	4	8	12	2	4	7	1	13	4	2	3	4	11
21ur-13690	0	0	0	0	0	0	0	0	0	1	0	0	1	0	0	0	0
21ur-13693	0	0	0	0	0	0	0	0	0	0	0	0	1	0	0	0	0
21ur-13696	2	0	0	0	0	0	0	0	0	0	0	0	0	0	0	0	0
21ur-1370	0	0	0	0	0	0	0	0	0	1	0	0	0	0	0	0	0
21ur-13709	0	0	1	1	0	5	3	1	0	0	0	3	0	2	0	1	0
21ur-13714	1	0	0	0	0	0	1	0	0	0	0	0	0	0	0	0	0
21ur-1372	0	0	0	0	0	0	0	0	0	1	0	0	0	0	0	0	0
21ur-13726	0	0	3	0	1	0	0	0	0	0	0	0	1	0	0	0	0
21ur-13729	0	0	0	0	0	0	0	0	0	0	0	0	0	0	1	0	0
21ur-13732	0	0	0	0	0	0	0	0	0	0	0	0	1	0	0	0	0
21ur-13739	1	0	0	0	0	0	0	0	0	2	0	0	1	0	0	0	0
21ur-1374	1	0	0	0	4	0	0	0	0	0	0	0	1	1	0	0	0
21ur-13743	0	0	0	0	0	0	0	1	1	2	0	0	0	0	0	0	0
21ur-13745	1	0	0	1	0	0	0	0	0	1	0	1	0	0	0	0	1
21ur-13749	0	0	0	0	1	0	0	0	0	0	0	0	0	0	0	0	0
21ur-13751	13	1	9	9	2	4	12	6	7	8	12	12	6	4	8	3	16
21ur-13763	0	0	0	0	0	0	0	0	0	1	0	0	0	0	0	0	1
21ur-13768	0	0	1	6	2	1	0	3	4	2	3	1	0	1	2	0	2
21ur-13769	0	0	0	0	0	0	0	0	0	2	0	0	0	0	0	0	0
21ur-13779	0	0	0	0	0	0	0	0	1	0	0	0	1	0	0	0	0
21ur-13782	0	0	0	0	2	0	4	0	1	2	0	0	0	0	0	0	1
21ur-13784	0	0	0	0	0	0	0	0	0	1	0	0	0	0	0	0	0
21ur-13786	0	1	5	0	3	1	3	1	0	3	2	0	1	1	2	0	0
21ur-13787	0	0	0	0	0	0	0	0	0	0	0	0	0	0	0	0	2
21ur-13789	0	0	0	0	0	1	0	0	0	0	0	0	0	0	0	0	0
21ur-13798	0	1	7	1	0	2	0	0	0	0	0	0	0	0	0	0	0
21ur-13801	0	0	0	0	0	0	1	0	0	3	0	0	0	0	0	0	1
21ur-13802	1	0	3	9	0	0	3	1	4	0	1	6	3	2	1	0	2
21ur-13804	1	0	0	0	0	3	2	0	2	0	0	3	0	1	5	1	3
21ur-1381	0	0	0	0	0	0	1	0	0	0	0	0	0	0	0	0	0
21ur-13815	0	0	0	0	0	0	0	0	1	0	0	0	0	0	0	0	1
21ur-13816	0	0	1	0	0	0	1	0	1	0	0	0	0	0	0	0	0
21ur-13828	2	0	6	1	0	1	4	0	2	2	0	3	2	4	2	7	15
21ur-13844	0	0	0	0	0	0	0	0	0	0	0	0	1	0	0	0	0
21ur-13845	0	0	0	0	0	0	0	0	1	0	0	0	0	0	0	0	0
21ur-13854	2	0	1	0	0	0	2	0	0	1	0	0	0	0	0	0	1
21ur-13857	0	0	0	0	0	0	0	0	0	0	0	0	0	0	3	0	0
21ur-13859	0	0	2	3	0	0	0	0	0	0	0	0	1	0	0	0	0
21ur-13861	0	0	0	0	0	0	0	0	0	1	0	0	0	0	0	0	0
21ur-13864	0	0	0	0	0	1	0	0	0	1	0	0	0	0	0	0	1
21ur-13866	5	2	9	5	2	2	4	2	5	6	4	8	5	4	8	6	9
21ur-1387	0	0	0	0	0	0	1	0	0	0	0	0	0	0	0	0	0
21ur-13877	5	13	33	14	10	20	26	12	28	18	10	37	17	14	14	11	36
21ur-13878	1	0	0	0	0	0	0	0	0	0	0	0	0	0	0	0	0
21ur-13881	0	0	0	0	0	0	1	0	0	1	0	0	0	0	0	0	0
21ur-13882	0	0	0	0	0	0	0	0	0	0	2	0	0	0	0	0	0
21ur-13884	2	0	0	0	0	0	0	0	1	1	0	0	0	0	0	0	0
21ur-13885	1	1	0	0	1	0	3	1	0	2	0	0	0	0	0	0	0
21ur-1389	0	0	0	0	0	0	0	0	0	0	0	0	2	1	0	1	3
21ur-13892	0	1	0	0	0	0	0	0	0	1	0	0	0	0	1	0	0
21ur-13894	0	0	0	1	0	0	0	0	0	0	0	0	1	0	0	0	1
21ur-13896	0	0	1	0	0	0	1	0	0	0	0	0	0	0	0	0	0
21ur-13897	0	0	0	0	0	0	0	0	0	1	0	0	0	0	0	0	0
21ur-1390	0	0	0	0	0	0	0	0	0	1	0	0	0	0	0	0	0
21ur-13900	0	0	0	0	0	0	0	0	0	0	0	0	0	0	0	0	1
21ur-13907	0	0	0	0	1	0	1	0	1	0	0	0	0	0	0	0	0
21ur-13910	0	0	1	0	0	0	0	0	1	0	0	0	0	0	0	1	0
21ur-13916	0	0	0	0	0	0	0	0	0	1	0	0	1	0	0	0	0
21ur-13919	0	0	0	0	0	0	0	0	0	0	0	0	1	0	0	0	0
21ur-13922	0	0	3	0	0	0	2	0	0	2	0	0	0	0	0	0	0
21ur-13926	0	0	0	0	0	0	0	0	0	1	0	0	0	0	0	0	1
21ur-1393	1	0	0	0	0	0	0	0	0	0	0	0	0	0	0	0	0
21ur-13931	0	0	0	0	0	0	0	0	1	0	0	0	1	0	0	0	0
21ur-13934	0	0	0	0	2	1	0	0	1	0	0	0	1	0	0	0	0
21ur-13939	0	0	0	0	0	1	1	0	0	0	0	0	0	0	1	0	0
21ur-13952	60	32	201	118	137	197	234	181	253	289	56	167	72	72	109	79	155
21ur-13954	0	0	0	0	0	0	0	0	0	2	0	0	0	0	0	0	0
21ur-13955	0	0	0	0	0	0	0	0	0	0	0	0	0	0	2	0	0
21ur-13956	0	0	0	0	0	0	0	0	0	0	0	0	1	0	0	0	0
21ur-13958	2	0	0	0	0	0	0	0	0	0	0	0	0	0	0	0	0
21ur-13969	0	0	0	0	0	0	0	0	0	0	0	1	0	0	0	0	0
21ur-13970	0	0	0	0	0	0	0	0	0	0	0	0	1	0	0	0	0
21ur-13979	0	0	0	0	0	0	0	0	0	0	0	0	0	0	0	0	1
21ur-13980	0	0	0	0	0	0	0	0	0	0	0	0	1	0	0	0	0
21ur-13989	1	0	0	0	1	2	2	0	0	0	0	0	0	0	0	0	0
21ur-13994	0	0	0	2	1	3	0	0	1	0	0	0	0	0	0	1	1
21ur-14001	1	0	0	0	0	0	0	0	0	0	0	0	0	0	0	0	0
21ur-14003	0	0	0	0	0	1	0	0	0	0	0	0	1	0	0	0	0
21ur-14009	0	0	0	0	0	0	1	0	0	0	0	0	0	0	0	0	0
21ur-14010	0	0	0	0	0	0	0	0	0	0	0	1	0	0	0	0	1
21ur-14016	0	0	4	0	0	0	0	0	0	0	0	0	0	0	0	0	0
21ur-14027	0	0	0	0	0	0	1	0	0	0	0	0	0	0	0	0	0
21ur-14028	0	0	0	0	0	0	0	0	0	0	1	0	0	0	0	0	0
21ur-14029	0	0	0	0	0	0	0	0	0	0	0	1	0	0	1	0	0
21ur-14031	1	0	0	0	1	3	1	0	2	1	0	0	0	1	0	0	0
21ur-14042	0	0	0	0	0	0	0	0	0	0	0	1	0	0	0	0	0
21ur-14043	1	0	0	0	0	0	0	0	0	0	0	0	0	0	0	0	0
21ur-14053	0	0	0	0	0	0	0	0	0	0	0	0	0	0	0	0	2
21ur-14054	0	0	0	0	0	0	1	0	3	0	0	1	1	1	0	0	0
21ur-1406	0	0	1	0	0	0	0	0	0	0	0	0	0	0	0	0	0
21ur-14060	0	1	1	1	0	1	1	1	2	1	0	3	0	2	1	1	1
21ur-14061	0	0	0	0	0	0	0	0	0	0	0	0	0	0	0	0	2
21ur-14063	0	0	0	0	0	0	0	0	1	0	0	0	0	0	0	0	0
21ur-14069	0	0	0	0	0	0	0	0	0	0	0	0	1	0	0	0	0
21ur-14072	0	0	0	0	0	0	0	0	0	0	0	0	0	0	0	1	0
21ur-14078	2	0	0	1	1	0	0	0	0	0	0	0	0	2	0	0	4
21ur-14082	0	0	0	0	0	0	0	0	0	0	0	0	1	0	0	0	0
21ur-14089	0	0	0	0	0	0	0	0	0	1	0	0	0	0	0	0	0
21ur-14090	0	0	0	0	1	0	0	0	1	0	0	0	0	0	0	0	0
21ur-14091	1	0	2	1	0	0	0	0	1	0	0	0	0	0	2	0	0
21ur-14095	0	0	0	0	0	0	0	0	1	1	0	0	0	0	0	0	0
21ur-14097	0	0	0	0	0	0	0	0	0	1	0	0	0	0	0	0	1
21ur-14099	0	0	0	0	0	0	0	0	0	0	2	0	1	0	0	0	0
21ur-141	0	0	0	0	0	0	0	0	0	0	0	1	0	0	0	0	0
21ur-14101	0	0	0	0	0	0	0	0	0	0	0	0	0	0	0	0	1
21ur-14106	1	0	1	0	0	0	0	0	0	0	0	0	0	0	0	0	0
21ur-1411	0	0	0	0	0	0	0	0	0	1	0	0	0	0	0	0	0
21ur-14122	0	0	1	0	0	0	0	0	0	0	0	0	0	0	0	0	0
21ur-14129	0	0	0	0	0	0	0	0	0	0	0	0	0	0	0	0	1
21ur-1413	0	0	0	0	0	0	1	0	0	0	0	0	0	0	0	0	0
21ur-14134	0	0	0	0	0	0	0	0	0	0	0	0	2	0	0	0	0
21ur-14137	0	0	0	0	0	0	0	0	0	2	0	0	0	0	0	0	0
21ur-14150	0	0	0	0	0	1	0	0	0	0	0	0	0	0	0	0	0
21ur-14152	0	0	0	0	0	0	0	0	1	0	0	0	0	0	0	0	0
21ur-14159	0	0	0	0	0	0	0	0	0	0	0	0	0	0	0	1	1
21ur-14168	0	0	0	0	0	0	0	0	0	1	0	0	0	0	0	0	0
21ur-1417	0	0	2	0	0	0	0	0	0	0	0	0	0	0	0	0	0
21ur-14175	0	0	0	0	0	1	3	1	0	0	0	0	0	0	0	0	0
21ur-14191	0	0	0	0	0	0	2	0	0	0	0	0	0	0	0	0	0
21ur-14193	0	0	1	0	0	0	0	0	0	0	0	0	0	0	0	0	0
21ur-14201	0	1	0	0	0	0	1	0	0	2	0	1	0	0	2	2	0
21ur-14202	0	0	0	0	0	0	0	0	0	0	0	0	1	0	0	0	0
21ur-14208	1	0	0	0	0	0	0	0	1	0	0	0	0	0	0	0	0
21ur-14231	0	0	0	0	0	0	0	0	0	0	0	0	0	0	0	0	1
21ur-14233	0	0	0	0	0	0	0	0	0	0	1	0	0	0	0	0	0
21ur-14235	0	0	0	0	0	0	2	0	0	0	0	0	0	0	0	0	0
21ur-14237	0	0	0	0	0	0	0	0	0	1	0	0	0	0	0	0	0
21ur-14262	0	0	0	0	0	0	0	0	0	2	0	0	0	0	0	0	1
21ur-14264	1	0	0	1	0	0	0	0	1	0	0	0	0	0	0	0	2
21ur-14269	6	4	15	10	14	16	16	6	10	19	4	20	8	7	10	13	13
21ur-14270	1	0	0	0	0	0	0	0	0	0	0	0	0	0	0	0	0
21ur-14279	0	0	0	0	0	0	2	1	0	0	0	0	1	0	0	0	0
21ur-1428	0	0	0	0	0	0	0	0	0	1	0	0	0	0	0	0	0
21ur-14281	0	0	0	0	0	0	0	0	1	0	0	0	0	0	0	0	0
21ur-14282	0	0	0	0	0	0	2	0	0	0	0	0	0	0	0	0	2
21ur-14283	0	0	2	0	0	0	0	0	0	0	0	0	0	0	0	0	0
21ur-14291	0	1	0	0	0	0	0	1	0	0	0	0	0	0	0	0	1
21ur-14295	0	0	0	0	0	0	0	0	1	1	0	0	1	0	0	0	0
21ur-14310	0	0	0	0	0	1	0	0	1	1	0	0	0	0	0	0	1
21ur-14313	1	3	0	0	0	0	0	0	0	0	0	0	1	1	1	1	0
21ur-14320	1	0	0	0	0	0	0	0	0	0	0	0	0	0	0	0	0
21ur-14324	0	0	0	0	0	0	0	0	0	2	0	0	0	0	0	0	0
21ur-14332	1	0	0	0	0	0	1	0	0	1	1	0	0	0	0	0	0
21ur-14333	1	0	0	0	0	0	0	0	0	0	0	0	0	0	0	0	0
21ur-14335	0	0	0	0	0	0	0	0	0	0	0	0	2	0	0	0	1
21ur-14351	0	0	0	0	2	0	0	0	0	0	0	0	0	0	0	0	0
21ur-14358	0	0	0	0	0	1	0	0	0	3	0	0	1	0	0	0	0
21ur-14359	0	0	0	0	0	0	1	0	0	0	0	0	0	0	0	0	0
21ur-14360	0	0	0	0	0	0	0	0	1	0	0	0	1	0	0	0	0
21ur-14362	0	1	0	1	0	0	0	0	0	4	0	0	0	0	0	0	0
21ur-14372	0	0	0	0	0	0	2	0	0	0	0	0	0	0	0	0	0
21ur-14374	0	0	0	0	1	0	0	0	0	0	0	0	0	0	0	0	0
21ur-14375	0	0	0	1	0	0	1	0	1	0	0	0	0	1	0	0	0
21ur-14376	6	2	5	1	0	0	6	3	1	1	0	1	2	0	1	0	0
21ur-14377	0	0	0	0	0	0	0	0	0	1	0	0	0	0	0	0	1
21ur-14381	0	0	0	0	0	0	0	0	0	0	0	0	0	0	0	0	1
21ur-14384	0	0	0	0	0	0	1	0	0	0	0	0	2	0	0	0	0
21ur-1439	0	0	0	0	0	0	0	0	0	2	0	0	1	0	0	0	0
21ur-14392	0	0	0	0	0	0	0	0	0	0	0	0	0	0	0	0	1
21ur-14394	0	0	0	0	0	0	0	0	0	0	0	0	0	0	0	0	1
21ur-144	0	0	0	0	0	0	0	0	0	2	0	0	1	0	0	0	0
21ur-14400	0	0	0	0	0	0	0	0	1	0	0	0	0	0	0	0	0
21ur-14402	0	0	0	0	0	0	0	0	0	2	0	0	0	0	0	0	0
21ur-14407	0	0	0	0	0	1	0	0	1	0	0	0	0	0	0	0	0
21ur-14408	0	0	0	1	0	0	0	0	0	2	0	0	0	0	0	0	0
21ur-1441	0	0	0	0	0	0	0	0	0	3	0	0	0	0	0	0	1
21ur-14415	1	1	7	7	2	4	6	3	0	3	2	3	1	1	1	0	3
21ur-1443	0	1	0	0	0	0	0	0	0	0	0	0	0	0	0	0	0
21ur-14434	0	0	0	0	0	0	0	0	0	1	0	0	2	0	0	0	0
21ur-14438	0	0	0	0	0	0	0	1	0	0	0	0	0	0	0	0	0
21ur-14439	0	0	1	1	6	3	5	1	7	9	0	1	0	0	0	0	2
21ur-14447	0	0	0	0	0	0	0	0	1	0	0	0	0	0	0	0	0
21ur-14449	22	12	45	36	28	35	38	22	59	37	16	39	17	25	24	16	49
21ur-14453	0	0	0	0	0	0	0	0	0	0	0	0	0	0	0	0	1
21ur-14457	0	0	0	0	0	0	0	0	0	0	0	0	0	0	0	0	2
21ur-14459	0	0	0	0	0	0	0	0	0	0	0	0	1	0	0	0	1
21ur-1446	0	0	0	0	0	0	1	0	0	0	0	0	0	0	0	0	0
21ur-14475	0	0	0	0	0	0	0	0	1	0	0	0	0	0	0	0	0
21ur-14484	0	0	0	0	0	0	0	0	0	0	0	1	0	0	0	0	1
21ur-1450	0	0	1	0	0	0	0	0	0	0	0	0	0	0	0	0	0
21ur-14503	0	0	0	0	1	0	2	1	2	0	1	0	0	0	0	0	0
21ur-14505	0	0	0	0	0	0	1	0	0	1	0	0	0	0	0	0	0
21ur-14510	0	0	0	1	0	0	0	0	0	0	0	0	0	0	0	0	0
21ur-14515	0	0	0	0	0	0	0	0	0	1	0	0	0	0	0	0	3
21ur-14517	0	0	1	0	2	0	0	0	1	0	0	0	0	0	0	0	0
21ur-14518	0	0	0	1	0	0	0	0	0	0	0	0	0	0	0	0	0
21ur-14519	0	0	0	0	1	1	0	1	0	0	0	0	0	0	0	0	0
21ur-1452	0	0	0	0	0	0	0	0	0	1	0	0	0	0	0	0	0
21ur-14522	1	0	0	2	0	0	0	0	0	0	0	0	0	0	0	0	1
21ur-14523	0	0	1	0	0	0	0	0	0	2	0	1	0	0	0	0	0
21ur-14524	1	0	0	0	0	0	0	0	0	0	0	0	1	0	0	0	0
21ur-14542	0	0	0	0	0	0	0	0	0	1	0	1	0	0	0	0	0
21ur-14549	0	0	0	0	0	0	1	0	0	1	0	0	0	0	0	1	0
21ur-1455	0	0	0	0	0	0	2	0	0	0	0	0	0	0	0	0	0
21ur-14552	0	0	0	0	0	0	0	0	0	1	0	1	0	0	0	0	0
21ur-14554	0	1	0	0	0	0	0	0	0	1	0	0	0	0	0	0	0
21ur-14559	0	0	0	0	0	0	0	0	0	0	0	2	0	0	0	0	0
21ur-14560	0	0	0	0	0	0	0	0	0	0	0	0	1	0	0	0	0
21ur-14563	0	0	0	0	0	0	0	0	0	0	0	0	1	0	0	0	0
21ur-14570	3	0	1	0	0	0	0	0	0	0	0	0	0	0	0	1	0
21ur-14576	0	0	0	0	0	0	1	0	0	0	0	0	0	0	0	0	1
21ur-1458	0	0	0	0	0	0	0	0	0	0	0	0	1	0	0	0	0
21ur-14580	0	0	0	0	0	0	0	0	0	1	0	0	0	0	0	0	0
21ur-14582	0	0	1	0	0	0	0	0	0	0	0	0	1	0	0	0	0
21ur-14594	0	0	0	0	0	0	0	0	1	0	0	0	0	0	0	0	0
21ur-14599	0	0	0	1	0	0	1	0	0	0	0	0	0	0	0	0	0
21ur-1461	0	0	0	0	0	0	0	0	0	0	0	0	1	0	0	0	0
21ur-1462	0	0	0	0	0	0	1	0	0	0	0	1	0	0	0	0	0
21ur-14624	1	1	2	5	2	1	2	6	2	7	0	0	0	0	2	1	2
21ur-14629	0	0	0	0	0	0	0	0	0	0	0	0	1	0	0	0	0
21ur-14638	0	0	0	0	0	0	1	0	0	0	0	0	2	0	0	0	0
21ur-14640	0	0	0	0	0	0	3	0	1	0	0	0	1	0	0	0	0
21ur-14642	0	0	0	0	0	0	0	0	0	1	0	0	1	0	0	0	0
21ur-14643	0	1	2	1	0	0	1	0	2	0	1	3	1	1	0	1	1
21ur-14645	0	0	0	0	0	0	0	0	1	0	0	0	1	0	0	0	0
21ur-14646	0	0	0	0	0	0	0	0	0	1	0	1	0	0	0	0	0
21ur-14648	0	0	0	0	0	0	0	0	0	0	0	1	0	0	0	0	0
21ur-1465	0	0	0	0	0	0	0	0	0	1	0	0	0	0	0	0	0
21ur-14651	1	1	1	0	0	0	0	0	0	1	0	0	0	0	0	0	0
21ur-1466	0	0	0	0	0	0	0	0	0	0	0	3	0	1	0	0	0
21ur-14663	0	0	0	0	0	0	0	0	0	0	0	0	1	0	0	0	0
21ur-14665	0	0	0	0	0	0	0	0	0	0	0	0	1	0	0	0	0
21ur-14667	0	0	0	0	0	0	0	0	0	1	0	0	0	0	0	0	0
21ur-1467	0	0	0	0	0	0	0	0	0	1	0	0	0	0	0	0	0
21ur-14677	0	0	0	0	0	0	0	0	1	0	0	0	0	0	0	0	0
21ur-14683	0	0	0	0	0	0	0	2	2	0	0	0	1	0	0	0	0
21ur-14685	2	0	4	0	1	2	1	1	1	2	2	6	0	2	0	4	5
21ur-14686	0	0	0	0	0	0	0	0	1	0	0	0	0	0	0	0	0
21ur-14694	0	0	0	0	0	0	0	0	0	1	0	0	0	0	0	0	0
21ur-14697	0	0	0	0	0	0	0	0	0	0	0	0	0	0	0	0	2
21ur-14699	0	0	0	0	0	1	1	0	0	0	0	0	0	0	0	0	0
21ur-147	0	0	0	0	0	0	0	0	0	2	0	0	0	0	0	0	0
21ur-14705	0	0	0	0	0	0	0	0	2	0	0	0	0	0	1	0	0
21ur-14707	0	0	0	0	0	0	1	0	0	0	0	0	0	0	0	0	0
21ur-14708	2	0	1	0	0	0	0	0	0	0	0	0	0	0	0	0	0
21ur-14709	11	3	26	11	0	1	4	0	0	0	2	2	0	0	0	0	3
21ur-14710	0	0	0	0	0	0	0	0	0	0	0	0	1	1	0	0	0
21ur-14713	0	0	0	0	0	0	0	0	0	0	0	0	0	0	0	0	1
21ur-14714	0	0	0	0	0	0	0	0	1	0	0	0	0	0	0	1	0
21ur-14715	0	0	0	0	0	0	1	0	0	1	0	0	1	0	0	0	0
21ur-14716	0	0	2	0	0	2	0	0	0	0	0	0	0	0	0	0	1
21ur-14719	0	0	0	0	0	0	0	0	0	1	0	0	0	0	0	0	0
21ur-1472	0	0	0	0	0	0	0	0	0	1	0	0	0	0	0	0	0
21ur-14720	0	0	1	2	0	0	0	0	1	1	0	0	1	0	0	0	0
21ur-14721	1	0	0	0	0	0	0	0	0	0	0	1	0	0	0	0	0
21ur-14722	0	0	0	0	0	0	0	0	0	0	0	0	1	0	0	0	0
21ur-14723	0	0	0	0	0	0	0	0	0	1	0	0	0	0	0	0	0
21ur-14724	76	58	166	124	183	235	230	144	309	248	80	226	78	154	184	151	255
21ur-14726	2	0	0	0	0	0	1	0	0	0	0	0	0	0	0	0	0
21ur-14733	0	0	0	0	0	0	0	0	0	0	0	0	0	0	0	0	1
21ur-14735	0	0	0	0	0	0	0	0	1	0	0	0	0	0	0	0	0
21ur-14736	2	0	0	0	0	0	0	0	0	0	0	0	0	0	0	0	0
21ur-14739	0	0	0	0	0	0	1	0	0	0	0	0	0	0	0	0	0
21ur-14740	0	1	0	0	0	0	0	0	1	2	0	0	0	0	0	0	0
21ur-14742	3	1	4	1	1	2	8	2	7	1	0	4	2	2	3	0	7
21ur-14743	0	0	0	0	0	0	0	0	0	1	0	0	0	0	0	0	0
21ur-14745	0	0	0	1	1	0	0	0	0	1	1	0	0	0	0	2	1
21ur-14746	0	0	0	0	0	0	0	0	0	0	0	0	1	0	0	0	0
21ur-14756	0	0	0	0	0	0	0	0	0	2	0	0	1	0	0	0	0
21ur-14757	0	0	0	0	0	0	0	0	0	0	0	0	0	0	0	0	1
21ur-14759	1	0	0	0	0	0	0	0	0	0	0	0	2	0	0	0	0
21ur-1476	0	0	0	0	1	0	1	0	0	0	0	0	1	0	0	0	0
21ur-14760	40	39	169	116	52	86	88	69	147	103	38	151	55	82	111	78	158
21ur-14765	0	0	0	0	0	1	0	0	0	0	0	0	0	0	0	0	0
21ur-14769	1	0	0	0	0	0	0	0	0	0	0	0	0	0	0	0	0
21ur-14773	0	0	2	1	1	0	0	0	2	1	0	5	0	4	5	2	3
21ur-14776	0	0	0	0	0	0	0	0	0	1	0	0	0	0	0	0	0
21ur-14780	0	0	0	0	0	1	0	0	0	3	0	0	0	1	1	0	1
21ur-14781	0	0	0	0	1	0	0	0	0	0	0	0	0	0	0	0	0
21ur-14787	0	0	0	0	0	0	0	0	0	0	0	0	1	0	0	0	0
21ur-14788	0	0	0	0	0	0	0	1	0	0	0	0	3	0	0	0	1
21ur-1479	2	0	0	0	0	0	2	0	0	0	0	0	0	0	0	0	0
21ur-14792	0	0	0	0	0	0	0	0	0	0	1	0	0	0	0	0	0
21ur-14794	0	0	0	0	1	0	0	0	1	0	0	0	0	0	0	0	0
21ur-14796	0	0	0	0	0	0	0	0	0	0	0	0	2	0	0	0	0
21ur-14797	2	3	11	5	2	1	5	2	5	8	1	10	2	3	10	2	5
21ur-14802	0	0	0	0	0	1	0	0	0	0	0	0	0	0	0	0	0
21ur-1481	0	0	0	0	1	0	0	0	0	0	0	0	0	0	0	0	0
21ur-14811	0	0	0	0	0	0	0	0	0	1	0	1	0	0	0	0	0
21ur-14814	1	0	0	0	0	0	0	0	0	0	0	0	0	0	0	0	0
21ur-14816	2	0	0	0	0	0	0	0	0	1	0	0	0	0	0	0	0
21ur-14817	0	0	1	1	0	1	0	1	0	0	0	1	0	0	0	0	0
21ur-14819	0	0	0	0	0	0	0	0	1	0	0	0	0	0	0	0	0
21ur-14820	1	0	0	0	0	0	1	2	0	1	0	0	0	0	0	0	0
21ur-14821	0	0	0	0	0	0	1	0	0	0	0	0	0	0	0	0	0
21ur-14822	0	0	0	0	0	0	1	0	1	0	0	1	1	0	0	0	1
21ur-14825	0	0	0	0	0	0	1	0	0	1	0	0	0	0	0	0	0
21ur-14831	0	0	0	0	0	0	0	0	0	1	0	0	0	0	0	0	0
21ur-14838	0	0	0	0	0	0	0	0	2	0	0	0	0	0	0	0	0
21ur-14839	1	0	0	0	0	0	0	0	0	0	0	1	0	0	0	0	0
21ur-1484	0	0	0	0	0	0	1	0	0	0	0	0	0	0	0	0	0
21ur-14844	0	0	0	0	0	0	0	0	0	0	0	0	1	0	0	0	0
21ur-14854	0	0	0	0	1	0	0	0	0	0	0	0	0	0	0	0	0
21ur-14856	0	0	0	0	0	0	1	0	0	1	0	0	0	0	0	0	0
21ur-1486	0	0	0	0	0	1	0	0	0	0	0	0	0	0	0	0	0
21ur-14860	1	0	0	0	0	0	0	0	0	0	0	0	0	0	0	0	1
21ur-1487	0	0	0	0	0	0	0	2	0	0	0	0	0	0	0	0	0
21ur-14870	0	0	0	0	0	0	0	0	1	0	0	0	0	0	0	0	0
21ur-14873	0	0	0	0	0	0	0	0	1	0	0	0	0	0	0	0	0
21ur-14877	0	0	0	0	0	1	1	0	0	0	0	0	0	0	0	0	0
21ur-14881	0	0	0	0	0	0	0	0	0	0	0	0	1	0	0	0	0
21ur-14887	0	0	0	0	1	1	1	1	0	0	0	0	0	0	0	0	0
21ur-14891	0	1	3	0	0	3	0	0	0	0	1	0	0	0	0	1	0
21ur-14898	0	0	0	0	0	0	0	0	0	2	0	0	0	0	0	0	0
21ur-14899	0	0	0	0	1	0	0	0	0	0	0	0	0	0	0	0	0
21ur-1490	0	0	0	0	0	1	0	0	0	1	0	0	0	0	0	0	2
21ur-14902	0	0	1	0	0	0	0	0	0	0	0	0	0	0	0	0	0
21ur-14903	0	0	0	0	0	0	0	2	1	0	0	0	0	0	0	0	0
21ur-14914	0	0	0	0	0	0	2	0	0	1	0	0	0	0	0	0	0
21ur-14918	0	0	0	0	0	0	0	0	0	1	0	0	0	0	0	0	0
21ur-14919	1	0	0	0	0	0	0	0	0	1	0	0	0	0	0	0	1
21ur-1492	0	0	0	0	0	0	0	0	0	0	0	0	0	0	0	0	1
21ur-14920	0	0	0	0	0	0	0	0	0	0	1	3	1	0	0	0	0
21ur-14922	0	0	0	0	1	0	0	0	0	0	1	0	0	0	0	0	0
21ur-14923	0	0	0	0	0	0	0	0	0	2	0	0	0	1	0	0	2
21ur-14926	0	0	0	0	0	0	2	0	0	0	0	0	0	0	0	0	0
21ur-14928	0	0	0	0	0	0	0	0	0	0	0	0	0	0	0	0	1
21ur-14929	0	0	0	0	0	0	2	0	0	0	0	0	0	0	0	0	0
21ur-1493	0	0	0	0	0	0	0	0	0	1	0	0	0	0	0	0	1
21ur-14934	0	0	0	0	0	0	0	0	0	1	0	0	0	0	0	0	0
21ur-14940	1	0	0	0	0	0	0	0	0	0	0	0	0	0	0	0	0
21ur-14944	0	0	0	0	0	0	0	1	0	0	0	0	0	0	0	0	0
21ur-14947	0	0	0	0	0	0	0	0	0	1	0	0	0	0	0	0	0
21ur-14948	0	0	0	0	0	0	0	0	0	0	0	0	1	0	0	0	0
21ur-14949	0	0	1	0	5	2	6	1	2	5	2	0	3	0	0	0	0
21ur-14951	1	3	5	2	0	1	2	1	3	2	3	2	1	1	12	1	7
21ur-14952	0	0	0	0	0	0	1	0	0	0	0	0	0	0	0	0	0
21ur-14956	1	0	0	0	0	0	0	0	0	0	0	0	0	0	0	0	0
21ur-1496	0	0	0	2	0	0	0	0	0	0	0	0	0	0	0	0	0
21ur-14969	0	0	0	0	0	0	1	0	0	1	1	0	0	0	0	0	0
21ur-14974	0	1	0	0	0	0	0	0	0	1	0	0	0	0	0	0	1
21ur-14975	0	0	1	0	0	1	2	0	0	1	0	0	0	0	0	0	0
21ur-14981	2	2	5	3	0	2	1	1	0	2	1	4	0	5	3	3	3
21ur-14982	0	0	0	0	0	0	0	0	0	0	1	0	0	0	0	0	0
21ur-14985	0	0	0	0	0	0	1	0	0	1	0	0	0	0	0	0	0
21ur-14986	0	0	0	0	0	0	0	0	0	0	0	0	0	0	0	0	1
21ur-14987	0	0	0	0	0	0	0	0	0	1	0	0	1	0	0	0	1
21ur-14988	0	0	0	0	0	0	0	0	0	1	0	0	1	0	0	0	0
21ur-14990	0	0	0	0	0	0	0	0	0	2	0	0	0	0	0	0	0
21ur-14991	0	0	0	0	0	0	0	0	0	1	0	0	0	0	0	0	0
21ur-14992	0	0	0	0	0	0	0	0	0	3	0	0	0	0	0	0	0
21ur-150	0	0	0	0	0	0	1	0	0	0	0	0	0	0	0	0	0
21ur-1500	0	0	0	0	0	0	0	0	0	0	0	0	0	0	0	1	1
21ur-15000	0	2	1	1	9	1	3	1	4	2	0	6	1	0	0	3	7
21ur-15004	1	0	0	1	1	0	1	0	2	1	1	0	1	0	0	0	0
21ur-15005	1	0	0	0	0	0	1	0	0	0	0	0	0	0	0	0	0
21ur-15006	0	1	0	0	0	2	0	0	0	5	0	0	0	0	0	0	0
21ur-15008	0	0	0	0	1	0	1	1	1	1	0	0	0	0	0	0	0
21ur-1501	0	0	0	0	0	0	0	0	0	1	0	0	0	0	0	0	0
21ur-15010	0	0	0	0	0	0	0	0	0	0	0	0	0	0	0	0	1
21ur-15017	0	0	1	0	0	0	0	0	0	0	0	0	1	0	0	0	0
21ur-1502	1	0	0	0	0	0	0	0	0	0	0	0	0	0	0	0	0
21ur-15020	1	0	0	1	0	1	0	0	0	0	0	0	0	2	0	0	1
21ur-15035	0	0	1	0	0	0	0	0	0	0	0	0	0	0	0	0	0
21ur-15037	0	0	0	0	0	0	0	0	0	1	0	0	0	0	0	0	1
21ur-1504	0	0	0	0	0	0	1	0	0	1	0	0	1	0	0	0	0
21ur-15046	0	0	0	0	0	0	0	0	1	1	0	0	0	0	0	0	0
21ur-15049	0	0	0	0	0	0	0	1	0	0	0	0	1	0	0	0	0
21ur-15051	0	0	0	0	0	0	0	0	0	0	0	0	1	0	0	0	0
21ur-15052	0	0	0	0	1	0	0	0	1	0	0	0	0	0	0	0	0
21ur-15055	0	0	0	1	0	1	0	1	1	3	0	1	1	0	2	0	0
21ur-15056	2	0	2	0	0	1	0	0	0	0	0	0	0	0	0	0	0
21ur-15059	0	1	2	0	0	0	0	1	0	1	1	0	0	3	2	0	0
21ur-1506	0	0	0	0	0	0	1	0	0	3	0	0	1	0	0	0	0
21ur-15060	0	0	0	0	0	1	1	0	1	0	0	0	0	0	0	0	0
21ur-15066	0	0	0	0	0	0	1	0	0	0	0	0	0	0	0	0	0
21ur-15068	0	0	0	0	0	0	0	0	2	0	0	2	1	0	1	0	2
21ur-15069	0	0	0	0	0	0	0	0	0	3	0	0	0	0	0	0	0
21ur-15071	0	0	0	0	1	0	0	0	0	0	0	0	0	0	0	0	0
21ur-15078	0	0	0	1	0	1	0	0	0	0	0	1	0	0	4	0	3
21ur-15079	1	0	0	0	0	0	0	0	0	0	0	0	0	0	0	0	0
21ur-1508	0	0	0	0	0	0	1	0	0	0	0	0	1	0	0	0	0
21ur-15082	0	0	0	0	0	0	0	0	0	1	0	0	0	0	0	0	0
21ur-15088	0	0	0	0	1	0	1	0	0	0	0	0	0	0	0	0	2
21ur-15089	0	0	0	0	0	0	0	0	1	1	0	0	1	1	0	0	0
21ur-1509	0	0	0	0	0	0	0	0	0	1	0	0	0	0	0	0	0
21ur-15090	0	0	1	0	0	0	1	0	0	0	0	0	0	0	0	0	0
21ur-15099	0	0	1	1	0	1	1	0	0	1	1	0	1	0	0	0	0
21ur-15102	1	0	2	0	0	0	0	0	0	2	0	0	0	0	0	0	0
21ur-15109	0	0	1	0	0	0	2	0	2	0	0	0	0	0	0	0	1
21ur-15110	1	1	0	0	0	0	0	0	0	0	0	1	0	0	1	0	0
21ur-15113	1	0	0	0	0	0	0	0	0	2	0	0	1	0	0	0	0
21ur-15115	0	0	0	3	0	0	3	0	0	0	0	0	0	0	0	0	0
21ur-15118	0	0	0	0	0	0	1	0	0	0	0	0	0	0	0	0	0
21ur-1512	0	0	0	0	0	2	0	0	0	1	0	0	0	0	0	0	1
21ur-15138	0	0	0	0	0	0	0	0	0	0	0	0	1	0	0	0	0
21ur-15141	0	0	0	0	0	0	0	0	0	1	0	0	0	0	0	0	0
21ur-15144	1	0	0	0	0	0	0	0	0	2	0	0	0	2	0	0	0
21ur-15145	0	0	0	0	0	0	1	0	0	0	0	0	0	0	0	0	1
21ur-15148	0	0	0	0	0	0	0	0	3	0	0	0	0	0	0	0	0
21ur-15149	0	0	0	0	0	1	5	1	1	0	0	0	0	0	0	0	0
21ur-15150	0	1	0	0	0	0	1	0	0	0	0	0	0	0	0	0	0
21ur-15151	2	0	0	0	0	0	0	0	0	2	0	0	0	0	0	0	0
21ur-15159	1	0	0	0	0	0	1	0	0	1	0	0	0	0	0	0	0
21ur-15160	1	0	0	1	0	0	0	0	0	0	0	0	0	0	0	0	0
21ur-15173	0	1	0	0	0	0	0	0	0	0	0	0	1	0	0	0	0
21ur-15174	0	0	0	0	0	2	0	0	0	0	0	0	0	0	0	0	1
21ur-15181	0	0	0	0	0	0	0	0	0	0	0	0	1	0	0	1	0
21ur-152	2	0	1	1	3	4	4	1	0	2	1	1	0	0	2	4	0
21ur-1520	0	0	0	0	0	0	0	0	0	0	0	0	0	0	1	0	0
21ur-15201	1	0	1	0	0	0	0	0	0	0	0	0	0	0	0	0	0
21ur-15223	0	0	0	0	0	0	3	0	2	1	0	0	0	0	0	0	0
21ur-15229	0	0	0	0	0	0	0	0	0	0	0	0	0	0	1	0	0
21ur-15239	0	0	0	0	0	0	0	0	1	0	0	0	0	0	0	0	0
21ur-1524	1	3	2	7	1	2	0	0	1	0	3	0	0	0	0	0	0
21ur-15242	0	0	0	0	0	0	0	0	0	0	0	0	1	0	0	0	0
21ur-15243	0	0	0	0	0	0	1	0	0	0	0	0	0	0	0	0	0
21ur-15244	1	0	1	0	0	0	0	0	0	0	0	0	1	0	0	0	0
21ur-15252	1	0	0	0	0	0	0	0	0	0	0	0	0	0	0	0	0
21ur-15256	0	0	0	0	0	0	0	0	0	1	0	0	0	0	0	0	0
21ur-15257	0	0	0	0	0	0	1	0	0	0	0	0	0	0	0	0	1
21ur-15259	0	0	0	0	0	0	1	1	2	0	0	0	0	0	0	0	0
21ur-1526	0	0	0	0	0	0	0	0	0	0	0	0	0	0	0	0	1
21ur-15261	0	0	0	0	0	0	0	1	0	0	0	0	0	0	0	0	0
21ur-15262	0	0	0	0	0	0	0	0	0	0	0	0	1	0	0	0	0
21ur-15265	0	0	0	0	0	0	0	1	0	0	0	0	0	0	0	0	0
21ur-15266	1	0	0	0	1	0	1	1	0	1	0	2	0	0	0	0	0
21ur-15267	0	0	0	0	0	0	0	0	4	0	0	0	0	0	0	0	0
21ur-15271	0	0	0	0	1	0	0	0	0	0	0	0	0	0	0	0	0
21ur-15273	0	0	0	0	0	0	0	0	0	0	0	0	1	0	0	0	0
21ur-15276	0	0	0	0	0	0	0	0	0	0	0	0	0	0	0	0	2
21ur-15280	0	0	0	0	0	0	0	0	0	0	0	0	1	0	0	0	2
21ur-15281	1	0	0	0	0	0	0	0	0	0	0	0	0	0	0	0	1
21ur-15284	0	0	0	0	0	0	0	0	1	0	0	0	0	0	0	0	1
21ur-15285	0	0	0	0	0	0	1	0	0	0	0	0	0	0	0	0	0
21ur-15287	0	0	0	0	0	0	0	0	0	2	0	0	0	0	0	0	0
21ur-1529	0	0	0	0	0	1	0	0	0	2	0	0	0	0	0	0	0
21ur-15291	0	0	0	0	0	0	0	0	0	0	0	0	1	0	0	0	0
21ur-15292	0	0	2	0	0	0	0	0	0	0	0	0	0	0	0	0	0
21ur-15295	1	0	0	4	2	2	4	0	1	2	0	2	4	0	3	2	3
21ur-1530	0	0	0	0	0	0	1	1	0	5	0	0	1	0	0	0	2
21ur-15302	0	0	0	0	0	0	4	0	0	0	0	0	0	0	0	0	1
21ur-15307	3	0	0	0	1	0	1	0	0	0	0	0	0	0	3	0	0
21ur-15314	0	0	0	0	0	0	0	0	0	0	0	0	1	1	0	0	0
21ur-15317	0	0	0	1	0	1	0	0	0	0	0	0	1	0	0	0	0
21ur-15323	0	0	0	0	0	0	1	0	0	1	0	0	0	0	0	0	0
21ur-15327	0	0	0	0	1	0	1	0	1	3	0	0	0	0	0	0	0
21ur-15336	0	0	0	0	0	0	0	0	0	0	0	0	0	0	1	0	0
21ur-15337	0	0	0	1	0	0	0	0	0	0	0	0	0	0	0	0	0
21ur-15339	0	0	0	0	0	0	0	0	0	0	0	0	1	0	0	0	0
21ur-15340	0	0	0	0	0	0	0	0	0	0	0	0	0	0	1	0	0
21ur-15343	0	0	3	3	4	3	8	0	3	1	1	5	2	1	1	1	1
21ur-15344	0	0	0	0	0	0	0	1	0	0	0	0	0	0	0	0	0
21ur-1535	3	0	0	0	0	0	0	0	0	0	0	0	0	0	0	0	0
21ur-15363	0	0	0	0	0	0	0	0	1	0	0	0	0	0	0	0	0
21ur-15370	1	0	1	0	0	0	0	0	0	0	0	0	0	0	0	0	0
21ur-15372	0	0	0	0	0	0	2	0	1	0	0	0	0	0	0	0	0
21ur-15373	0	0	1	1	0	1	3	4	4	3	0	0	3	1	1	2	3
21ur-15375	0	0	1	3	0	0	2	0	0	3	0	0	0	0	0	0	1
21ur-15377	0	0	0	0	0	0	0	0	0	0	0	0	1	0	0	0	0
21ur-15379	0	0	2	2	0	2	0	0	0	1	0	0	0	0	0	0	0
21ur-1538	0	0	0	0	0	0	0	0	0	0	0	0	1	0	0	0	0
21ur-15380	0	0	4	0	0	0	0	0	0	0	0	0	0	0	0	0	0
21ur-15385	0	0	0	2	2	2	2	1	4	0	0	0	0	0	0	0	0
21ur-15386	1	0	0	2	2	0	6	1	0	1	3	3	1	0	1	1	4
21ur-15389	0	0	0	0	0	0	0	0	1	0	0	0	0	0	0	0	0
21ur-15395	0	1	0	0	0	0	0	0	0	0	0	0	0	0	0	0	0
21ur-15399	1	0	0	0	0	0	0	0	0	0	0	0	0	0	0	0	0
21ur-154	0	0	0	0	0	0	1	0	0	0	0	2	0	0	0	0	0
21ur-1540	0	0	0	0	0	0	0	0	0	0	0	0	0	0	0	0	1
21ur-15402	0	0	0	0	0	0	1	0	0	0	0	0	0	0	0	0	0
21ur-15406	0	0	0	0	0	0	0	0	0	0	0	0	1	0	0	0	0
21ur-15412	0	0	0	0	0	0	0	0	0	0	0	0	1	0	0	0	0
21ur-15415	0	0	0	0	0	0	1	0	0	0	0	0	0	0	0	0	0
21ur-15432	0	0	0	0	0	0	0	0	0	0	0	0	1	0	0	0	0
21ur-15437	0	0	0	0	0	0	1	1	0	0	0	0	0	0	0	0	0
21ur-15448	0	0	0	0	0	0	0	0	0	1	0	0	0	0	0	0	0
21ur-1545	1	0	0	0	0	0	0	0	0	0	0	0	0	0	0	0	0
21ur-15452	0	0	0	0	0	0	0	0	0	2	0	0	0	0	0	0	0
21ur-1546	0	0	0	0	0	0	0	0	0	1	0	0	0	0	0	0	1
21ur-15462	0	0	0	0	0	0	0	0	0	1	0	0	0	0	0	0	0
21ur-15475	0	0	2	0	1	0	0	0	0	2	0	0	1	0	0	0	0
21ur-15478	0	0	0	0	0	0	0	0	0	1	0	0	0	0	0	0	0
21ur-15482	0	0	0	0	0	0	0	0	0	0	0	0	1	0	0	0	0
21ur-15483	0	0	0	0	0	0	0	0	0	0	0	0	1	0	0	0	0
21ur-15484	0	1	0	0	0	0	0	0	0	0	0	0	0	1	0	0	0
21ur-15485	0	0	0	0	0	0	0	0	0	1	0	0	0	0	0	0	0
21ur-15486	0	0	0	0	0	0	0	0	1	0	0	0	0	2	0	0	1
21ur-15491	2	0	7	7	2	2	1	1	4	6	0	5	2	3	2	6	8
21ur-15499	2	0	0	0	2	0	0	1	0	0	0	0	0	0	0	0	0
21ur-15502	0	0	0	0	0	0	0	0	1	0	0	0	0	0	0	0	0
21ur-15503	0	0	0	0	0	0	0	0	0	0	0	0	0	0	0	0	1
21ur-15504	0	0	0	0	3	1	2	1	1	1	0	0	0	0	0	0	0
21ur-15505	0	0	0	0	0	0	1	0	0	1	0	0	0	0	0	0	0
21ur-15508	1	1	1	0	1	0	0	0	0	1	0	1	2	0	0	1	3
21ur-15510	0	0	0	0	0	0	0	0	0	1	0	0	0	0	0	0	0
21ur-15511	1	0	0	0	0	0	2	0	0	0	0	0	0	1	1	0	1
21ur-15513	0	0	0	1	0	0	0	0	0	0	0	0	0	0	0	0	0
21ur-15514	1	0	1	0	0	0	0	0	0	0	0	0	0	0	0	0	0
21ur-15517	0	0	0	0	0	0	0	0	0	1	0	0	0	0	0	0	0
21ur-15518	0	0	0	0	0	0	1	0	0	0	0	0	0	0	0	0	0
21ur-15521	0	0	0	1	0	0	0	0	1	0	0	0	0	0	0	1	0
21ur-15522	0	0	0	0	0	0	0	0	1	1	0	0	0	0	0	0	0
21ur-15531	0	0	0	0	0	0	0	0	2	0	0	0	0	0	0	0	0
21ur-15539	0	0	0	2	0	0	2	0	0	0	0	0	0	0	1	0	0
21ur-15545	0	0	0	0	0	0	1	0	0	1	0	1	0	0	0	0	0
21ur-15546	3	0	0	3	0	0	0	0	1	0	0	0	1	0	0	0	2
21ur-15549	0	0	0	0	0	0	0	0	0	1	0	0	0	0	0	0	0
21ur-15550	0	0	0	0	0	0	0	0	0	1	0	0	0	0	0	0	0
21ur-15554	0	0	0	0	0	0	0	0	0	0	0	0	0	0	0	0	2
21ur-15558	0	0	0	0	0	0	0	0	0	0	0	0	1	0	0	0	0
21ur-1556	0	1	2	0	0	1	2	0	1	2	0	2	1	2	1	0	0
21ur-1557	0	0	0	0	0	0	0	0	0	1	0	0	0	0	0	0	0
21ur-15575	1	0	6	1	0	2	0	1	0	3	0	0	1	0	0	0	0
21ur-15588	30	16	35	36	49	36	34	21	70	51	29	51	22	17	24	15	50
21ur-15589	40	22	97	45	32	62	68	31	93	79	25	83	30	48	47	60	88
21ur-15590	0	0	12	13	2	6	4	0	0	0	1	1	1	1	0	1	4
21ur-15592	0	0	0	0	0	0	0	0	0	0	0	0	0	0	0	0	2
21ur-15600	0	0	0	0	0	0	0	0	0	0	0	0	3	0	0	0	0
21ur-15606	0	0	0	0	0	0	0	0	0	0	0	0	1	0	0	0	1
21ur-15611	0	0	0	0	0	0	1	0	0	0	0	0	1	0	0	0	0
21ur-15613	0	0	0	0	0	0	0	0	0	2	1	0	0	0	0	0	0
21ur-15615	0	0	0	0	0	0	0	0	0	3	0	0	0	0	0	0	0
21ur-15617	0	0	0	0	0	0	0	0	0	0	0	0	0	0	0	0	3
21ur-15618	1	0	0	0	0	0	0	0	0	0	0	0	0	0	3	0	1
21ur-1562	0	0	0	0	0	0	0	0	0	0	0	0	0	0	0	0	1
21ur-15628	0	0	0	0	0	0	0	0	0	0	0	0	2	0	0	0	0
21ur-1563	0	0	0	0	0	0	0	0	0	0	0	0	1	0	0	0	0
21ur-15630	35	35	98	58	19	28	28	10	41	27	62	155	61	47	66	62	133
21ur-15634	0	0	0	0	0	1	1	0	0	0	0	0	0	0	0	0	0
21ur-15641	0	1	1	0	5	0	0	2	2	1	0	0	0	0	0	1	0
21ur-15644	0	0	0	0	0	0	0	0	0	0	0	0	1	0	0	0	0
21ur-15648	0	0	0	0	0	0	0	0	0	0	0	0	0	0	0	0	2
21ur-1565	0	0	0	0	0	0	0	0	0	1	0	0	0	0	0	0	1
21ur-15653	0	0	0	0	0	0	1	0	0	0	0	0	0	0	0	0	0
21ur-15659	0	0	0	0	0	0	0	0	0	2	0	0	0	0	0	0	0
21ur-15667	0	0	3	0	0	1	0	0	0	0	0	0	0	0	0	0	0
21ur-15668	0	0	3	1	0	0	0	0	0	0	0	0	0	0	0	0	0
21ur-15671	0	0	0	0	1	0	5	2	1	1	0	2	1	0	0	0	0
21ur-15672	0	0	0	0	0	0	2	0	0	1	0	0	1	0	0	0	0
21ur-15673	50	29	123	72	67	51	104	69	136	102	21	155	58	68	64	57	153
21ur-15680	0	0	0	0	0	0	2	0	1	0	0	0	1	0	2	0	0
21ur-15691	0	0	0	0	0	0	1	0	0	0	0	0	0	0	0	0	0
21ur-15693	0	0	0	0	0	0	0	0	1	0	0	0	0	0	0	0	0
21ur-15699	0	0	0	0	0	0	0	0	0	0	0	0	1	0	0	0	0
21ur-15700	0	0	0	0	0	0	0	0	0	2	0	0	1	0	0	0	0
21ur-15701	0	0	0	0	2	1	0	0	0	0	0	0	0	0	0	0	1
21ur-15702	0	0	0	0	0	0	0	0	0	0	0	0	1	0	0	1	0
21ur-1571	0	0	0	0	0	0	1	0	0	0	0	0	0	0	0	0	0
21ur-1572	0	2	4	0	0	0	3	0	4	3	0	3	2	3	1	0	2
21ur-1578	1	0	0	0	0	0	0	0	0	0	0	0	0	0	0	0	1
21ur-1579	0	0	1	0	0	0	0	0	0	0	1	0	0	0	0	0	0
21ur-1580	0	0	0	0	3	0	0	0	0	0	0	0	0	0	0	0	0
21ur-1581	0	0	0	0	0	0	0	0	0	3	0	0	0	0	0	0	0
21ur-1583	1	0	0	0	0	0	0	0	0	0	0	0	0	0	0	0	0
21ur-1584	0	0	0	0	0	0	0	0	0	0	0	0	0	0	0	0	1
21ur-1588	0	0	0	0	0	0	1	0	0	1	0	0	0	0	0	0	1
21ur-1589	1	0	0	0	0	0	0	0	0	0	0	0	2	0	0	0	0
21ur-1592	0	0	0	0	0	0	0	0	0	0	0	0	0	0	0	0	1
21ur-1593	0	0	0	0	0	0	0	0	1	0	0	0	0	0	0	0	0
21ur-1598	0	0	0	0	0	0	0	0	0	1	0	0	2	0	0	0	0
21ur-1608	0	0	0	3	0	0	0	0	0	0	0	0	0	0	0	0	0
21ur-1609	0	0	0	0	0	0	1	0	0	0	0	0	0	0	0	0	0
21ur-1612	0	0	0	0	0	0	0	0	0	1	0	0	0	0	0	0	0
21ur-1614	0	0	0	0	0	0	0	0	0	1	0	0	0	0	0	0	0
21ur-1615	0	0	0	0	0	0	0	0	0	0	0	0	1	0	0	0	2
21ur-1618	0	0	0	0	0	1	0	0	0	0	0	1	0	0	0	0	0
21ur-162	0	0	0	0	0	0	2	0	0	0	0	0	0	0	0	0	1
21ur-1621	0	0	0	0	0	0	0	0	0	0	0	0	1	0	0	0	1
21ur-1627	0	0	0	0	0	0	0	0	3	0	0	0	1	0	0	0	3
21ur-1630	0	0	0	0	0	0	0	0	0	0	0	0	0	0	0	0	1
21ur-1631	0	0	0	0	0	0	0	0	0	0	1	0	2	0	0	0	0
21ur-1633	0	0	0	0	0	0	0	0	0	0	0	0	1	1	0	0	0
21ur-1635	2	0	0	0	0	0	0	0	0	2	0	0	0	0	0	0	0
21ur-1638	0	0	0	0	0	0	0	0	0	0	0	0	0	0	0	0	1
21ur-164	1	0	0	2	0	0	0	0	0	1	0	0	0	0	0	0	0
21ur-1644	0	0	0	0	0	0	0	0	0	0	1	0	0	0	0	0	0
21ur-1647	1	0	0	0	0	0	0	0	2	1	0	0	1	0	0	0	0
21ur-1650	0	0	0	0	0	0	0	0	0	0	0	0	1	0	0	0	1
21ur-1657	0	0	0	0	0	0	0	0	2	0	0	0	0	0	0	0	0
21ur-166	1	0	0	0	0	0	0	0	0	0	0	0	0	0	0	0	0
21ur-1662	0	0	0	0	0	0	0	0	0	0	0	0	0	0	0	0	1
21ur-1663	0	0	0	0	0	1	4	1	1	0	0	0	0	0	0	0	0
21ur-1665	1	0	1	2	0	0	1	0	0	0	0	0	1	0	0	0	0
21ur-1666	0	0	0	0	0	0	0	0	0	1	0	0	0	0	0	0	1
21ur-1667	0	0	0	0	0	0	0	0	0	2	0	0	0	0	0	0	0
21ur-1668	0	0	0	0	0	0	0	1	0	0	0	0	0	0	0	0	1
21ur-167	1	0	3	1	0	0	0	0	0	0	0	0	1	0	0	0	0
21ur-1670	1	0	1	0	1	1	0	0	0	1	0	1	1	0	2	0	0
21ur-1677	0	0	0	0	0	0	0	0	0	0	0	0	1	0	0	0	0
21ur-1679	0	0	0	0	0	0	0	0	3	0	0	0	0	0	0	0	0
21ur-168	0	0	1	0	0	0	1	0	5	1	0	2	0	0	0	1	0
21ur-1681	0	0	1	0	1	1	0	0	0	0	0	0	0	0	0	0	0
21ur-1682	0	0	0	0	0	0	1	0	0	0	0	0	0	0	0	0	0
21ur-1683	0	0	0	0	0	0	0	0	0	0	1	0	0	0	0	0	1
21ur-1685	0	0	0	0	0	0	0	0	0	0	0	0	0	0	0	0	1
21ur-1686	0	0	0	0	0	0	2	0	0	1	0	1	0	0	0	0	0
21ur-1687	1	0	0	0	0	0	0	0	0	0	0	0	0	0	0	0	0
21ur-1688	2	0	0	0	0	0	1	0	0	0	0	0	0	0	0	0	0
21ur-1690	0	0	0	0	0	0	0	0	0	1	0	0	0	0	0	0	0
21ur-1692	0	0	0	0	0	0	1	0	0	0	0	0	1	0	0	0	0
21ur-1698	0	0	0	0	0	0	0	0	1	0	0	0	0	0	0	0	0
21ur-170	0	0	0	0	0	0	1	0	0	2	0	0	0	0	0	0	0
21ur-1700	0	1	1	0	0	0	0	0	0	0	0	1	0	0	0	1	1
21ur-1707	0	0	0	0	0	0	0	0	0	0	0	0	0	0	0	0	1
21ur-1710	0	0	0	0	0	0	0	0	0	1	0	0	0	0	0	0	0
21ur-1713	0	0	0	0	0	0	0	0	0	0	1	0	3	0	0	0	0
21ur-1715	0	0	0	0	0	0	0	0	0	0	0	1	0	0	0	0	0
21ur-1719	0	0	0	0	0	0	1	0	0	0	0	0	0	0	0	0	0
21ur-1722	0	0	1	0	0	0	0	0	1	0	0	0	0	0	0	0	0
21ur-1725	0	0	0	1	0	0	0	0	0	0	0	0	0	0	0	0	0
21ur-1728	0	0	0	0	0	0	0	0	0	1	0	0	1	0	0	0	1
21ur-173	0	0	0	1	0	0	0	0	0	0	0	0	0	0	0	0	0
21ur-1734	0	0	2	0	0	0	0	0	0	0	0	0	0	0	0	0	0
21ur-1738	0	0	0	0	0	0	0	0	0	0	0	0	0	0	1	0	0
21ur-1743	0	0	0	0	0	0	0	0	0	1	0	0	0	0	0	0	0
21ur-1748	0	0	0	0	0	1	0	0	0	0	0	0	0	0	0	0	0
21ur-1749	0	0	0	0	0	0	4	0	1	2	1	0	0	0	0	0	0
21ur-1751	0	0	0	0	0	0	0	0	0	0	0	0	1	0	0	0	0
21ur-1752	0	0	1	0	0	0	0	0	0	0	0	0	0	0	0	0	0
21ur-1753	0	0	0	1	0	0	0	0	0	0	0	0	0	0	0	0	0
21ur-1754	0	1	0	3	0	0	0	0	1	0	0	0	0	0	0	0	1
21ur-1764	0	0	0	0	0	0	0	0	1	0	0	0	0	0	0	0	1
21ur-1770	0	0	0	0	0	0	0	0	0	0	0	0	0	0	0	1	0
21ur-1773	0	0	0	0	0	0	0	0	0	0	0	0	1	0	0	0	0
21ur-1774	0	0	0	0	0	0	0	0	1	0	0	0	0	0	0	0	0
21ur-1776	0	0	0	0	0	1	0	0	0	0	0	0	0	0	0	0	1
21ur-1777	0	0	0	0	0	1	0	1	0	0	0	0	0	0	0	0	0
21ur-1778	0	0	0	0	0	0	3	0	0	1	0	0	0	0	0	0	0
21ur-1779	0	0	0	0	1	0	0	0	1	0	2	0	1	0	0	0	0
21ur-1786	0	0	0	0	0	0	0	0	0	0	0	0	1	0	0	0	0
21ur-1792	0	0	0	0	0	0	0	0	0	0	0	0	1	0	0	0	0
21ur-1793	0	0	0	0	0	0	1	0	0	0	0	0	1	0	0	0	0
21ur-1794	0	0	0	0	2	0	4	0	0	1	0	0	0	0	0	0	0
21ur-1796	0	0	1	0	0	0	0	0	0	0	0	0	0	0	0	0	2
21ur-1798	0	0	0	0	0	0	0	0	0	0	0	0	0	0	0	0	1
21ur-1799	0	0	0	0	0	0	0	0	1	0	0	0	0	0	0	0	0
21ur-18	1	0	0	0	0	0	0	0	0	0	0	0	0	0	0	0	0
21ur-1805	0	0	0	0	0	0	0	0	0	0	1	0	0	0	0	0	0
21ur-1807	0	0	0	0	0	1	0	0	0	0	1	0	0	0	0	0	0
21ur-1808	2	0	0	0	0	0	0	0	0	0	0	1	0	0	0	0	0
21ur-1810	0	0	0	0	0	0	0	0	1	0	0	1	0	0	0	0	0
21ur-1811	0	0	0	0	0	0	0	0	0	0	0	0	1	0	0	0	0
21ur-1815	0	0	0	0	1	1	6	0	1	0	0	0	0	0	0	0	0
21ur-1817	0	0	0	0	0	0	0	0	0	0	0	0	1	0	0	0	0
21ur-1818	2	0	0	0	0	0	0	0	1	0	0	0	0	0	0	0	1
21ur-1819	0	0	0	0	0	2	0	0	0	0	0	0	0	0	0	0	0
21ur-1820	0	0	0	0	0	0	0	0	0	1	0	0	0	0	0	0	0
21ur-1821	1	0	0	0	0	0	0	0	0	0	0	0	0	0	0	0	0
21ur-1828	2	0	0	0	0	0	0	0	2	1	0	0	0	0	0	0	0
21ur-1829	0	0	0	0	0	2	0	0	0	1	0	1	0	0	0	0	0
21ur-183	0	0	0	0	0	0	0	0	0	1	0	0	1	0	0	0	0
21ur-1832	0	0	0	0	0	0	0	0	0	1	0	0	0	0	0	0	0
21ur-1833	0	0	0	0	0	0	0	0	0	1	0	0	0	0	0	0	0
21ur-1835	0	0	0	0	0	0	0	0	0	1	0	0	0	0	0	0	0
21ur-1837	0	0	0	0	0	0	0	0	0	0	0	0	1	0	0	0	1
21ur-1839	0	0	0	0	0	0	0	0	0	1	0	0	0	0	0	0	0
21ur-1840	0	0	0	0	0	0	0	0	0	0	0	0	1	0	0	0	0
21ur-1841	0	0	0	0	0	0	0	1	0	0	0	0	0	0	0	0	0
21ur-1847	0	0	0	0	0	0	0	0	0	0	0	0	2	0	0	0	1
21ur-1849	0	0	0	0	0	0	0	0	0	0	0	0	1	0	0	0	0
21ur-1852	0	0	0	0	0	0	0	0	0	0	0	0	2	0	0	0	0
21ur-186	0	1	0	0	0	0	0	0	0	0	0	0	0	0	0	0	0
21ur-1862	0	0	0	0	0	0	0	0	0	1	0	0	0	0	0	0	0
21ur-1867	1	0	0	0	0	0	0	0	0	0	0	0	0	0	0	0	0
21ur-1868	0	0	0	0	0	0	0	0	1	0	0	0	0	0	0	0	0
21ur-187	0	0	0	0	0	0	0	0	0	0	0	0	1	0	0	0	0
21ur-1870	0	0	0	0	0	0	1	0	0	2	0	0	0	0	0	0	0
21ur-1876	0	0	0	0	0	0	0	0	0	0	0	0	1	0	0	0	0
21ur-1883	0	0	0	0	0	0	0	0	0	0	0	0	1	0	0	0	0
21ur-1885	3	1	5	8	0	0	0	1	0	1	0	0	0	0	0	0	0
21ur-1886	0	0	0	0	0	0	0	0	0	2	0	0	0	0	0	0	0
21ur-1890	0	0	0	0	0	0	0	0	0	0	0	0	0	0	0	0	2
21ur-1891	0	0	3	0	1	1	2	0	0	0	0	0	0	0	0	0	0
21ur-1893	0	0	3	0	0	0	0	0	0	2	0	0	0	0	0	0	0
21ur-1897	0	0	0	0	0	0	2	0	0	1	0	0	0	0	0	0	0
21ur-1903	0	0	0	0	0	1	1	0	0	0	0	0	0	0	0	0	0
21ur-1906	0	1	0	0	0	0	0	0	0	1	0	0	0	0	0	0	0
21ur-1908	0	0	0	0	1	0	0	0	0	1	0	0	0	0	0	0	0
21ur-191	0	0	0	0	0	0	0	0	0	0	0	0	1	0	0	0	0
21ur-1910	0	0	0	0	0	0	0	0	0	1	0	0	0	0	0	0	1
21ur-1920	0	0	0	3	0	0	0	0	0	0	1	0	1	0	0	0	0
21ur-1926	0	0	0	0	0	0	2	0	0	0	0	0	0	0	0	0	0
21ur-1927	0	0	0	0	0	0	0	0	0	0	0	0	1	0	0	0	0
21ur-1928	0	0	0	0	0	0	0	0	0	3	0	0	0	0	0	0	0
21ur-193	0	0	0	1	0	0	0	0	0	0	0	0	0	0	0	0	0
21ur-1933	0	0	0	1	0	0	0	0	1	0	0	0	0	0	0	0	0
21ur-1936	0	0	0	0	0	0	0	0	0	0	0	0	0	0	0	0	2
21ur-194	0	0	0	0	0	0	0	0	0	2	0	0	0	0	0	0	0
21ur-1941	0	0	0	0	0	0	0	0	0	1	0	0	0	0	0	0	0
21ur-1942	0	0	0	0	0	0	0	0	0	1	0	0	0	0	0	0	0
21ur-1950	1	0	0	0	0	0	0	0	0	0	0	0	0	0	0	0	0
21ur-1954	1	0	0	0	0	0	0	0	1	0	0	0	0	0	0	0	0
21ur-1958	0	0	0	0	0	0	1	0	0	0	0	0	0	0	0	0	0
21ur-1962	0	0	0	0	0	0	0	0	0	0	0	0	1	0	0	0	0
21ur-1963	0	0	0	0	0	0	1	0	0	1	0	0	0	0	0	0	0
21ur-1968	0	0	0	0	0	0	2	0	0	0	0	0	0	0	0	0	0
21ur-197	0	0	0	0	0	0	0	0	2	0	0	0	0	0	0	0	0
21ur-1971	0	0	0	0	0	0	0	0	0	0	0	0	1	0	0	0	0
21ur-1974	0	0	0	0	0	0	2	0	0	0	0	0	1	0	0	0	0
21ur-1978	0	0	0	0	0	0	0	0	0	0	0	0	1	0	0	0	0
21ur-1979	0	0	0	0	0	0	0	0	0	1	0	0	0	0	0	0	0
21ur-198	0	0	0	0	0	0	0	0	0	0	0	0	0	1	0	0	0
21ur-1980	0	0	0	0	0	0	0	0	0	1	0	0	1	0	0	0	0
21ur-1984	0	0	0	0	0	2	0	0	0	0	0	0	0	0	0	0	0
21ur-199	0	0	0	0	0	0	2	0	0	0	0	0	2	0	0	0	0
21ur-1991	0	0	1	0	0	0	1	0	0	0	0	0	0	0	0	0	0
21ur-1992	0	0	0	0	0	0	0	0	0	0	0	0	0	0	0	0	1
21ur-1993	0	0	2	0	0	1	3	0	0	0	0	0	0	0	0	0	2
21ur-1996	0	0	0	0	0	0	1	0	0	0	0	0	0	0	0	0	0
21ur-1997	0	0	0	3	0	0	0	0	0	0	0	0	0	0	0	0	1
21ur-2003	0	0	0	1	0	0	0	0	0	0	0	0	0	0	0	0	0
21ur-2013	0	0	0	0	0	0	0	0	0	0	1	0	2	0	0	0	0
21ur-2022	0	0	0	0	0	0	2	0	0	0	0	0	1	0	0	0	0
21ur-2030	0	0	0	0	0	0	0	0	2	0	0	0	2	0	0	0	0
21ur-2037	0	0	0	0	0	0	0	0	0	1	0	0	0	0	0	0	0
21ur-204	0	0	0	0	0	0	0	0	0	0	0	0	0	0	0	0	1
21ur-2040	0	0	0	0	0	0	0	0	0	0	0	0	0	0	1	0	0
21ur-2041	0	0	0	0	0	0	0	0	0	0	0	1	0	0	0	0	0
21ur-2045	0	0	0	0	0	0	0	0	0	0	0	0	0	0	0	0	1
21ur-2048	0	0	0	0	0	0	0	0	1	0	0	0	0	0	0	0	0
21ur-2052	0	0	0	0	0	0	0	0	1	0	0	0	0	0	0	0	1
21ur-2061	0	0	0	0	0	1	1	0	0	0	0	0	1	0	0	0	0
21ur-2065	0	0	1	0	0	0	0	0	0	1	1	0	0	0	0	0	0
21ur-207	0	0	1	0	0	0	0	0	0	0	0	0	0	0	0	0	1
21ur-2070	0	0	2	0	0	0	0	0	0	0	1	1	0	0	1	0	0
21ur-2072	1	0	0	0	0	0	0	0	0	0	0	0	0	0	0	0	0
21ur-2074	0	0	0	0	0	0	0	0	0	1	0	0	0	0	1	0	1
21ur-2075	0	0	0	0	0	0	0	0	0	0	0	0	1	0	0	0	0
21ur-2079	0	0	0	0	0	0	0	0	1	0	0	0	0	0	0	0	0
21ur-208	0	0	0	0	0	0	0	0	0	0	0	0	1	0	0	0	0
21ur-2081	0	0	0	0	0	0	0	0	0	0	1	0	0	0	0	0	0
21ur-2086	0	0	1	0	0	0	0	0	0	0	0	0	2	0	0	0	0
21ur-2087	0	0	0	0	0	0	2	0	0	0	0	0	0	0	0	0	0
21ur-2089	0	0	0	0	0	0	0	0	0	0	0	0	1	0	0	0	0
21ur-209	0	0	0	0	0	0	0	0	0	0	0	0	0	0	0	0	1
21ur-2094	0	0	0	0	0	0	1	0	0	0	0	0	1	0	0	0	0
21ur-2095	0	0	0	0	0	1	0	0	0	1	0	1	0	0	0	0	0
21ur-2099	0	0	1	0	0	0	0	0	0	0	0	0	0	0	0	0	0
21ur-21	0	1	0	0	0	1	0	0	0	0	0	0	0	0	0	0	0
21ur-210	0	0	0	0	0	0	2	0	0	0	0	0	0	0	0	0	0
21ur-2104	0	0	0	0	0	0	0	0	0	1	0	0	0	0	0	0	0
21ur-2105	0	0	0	0	1	1	3	0	0	1	0	2	0	0	0	0	0
21ur-2114	0	0	0	0	0	0	0	0	0	0	0	0	1	0	0	0	0
21ur-2118	0	0	2	1	0	0	0	0	0	0	1	0	0	1	4	2	1
21ur-2120	0	0	1	0	0	2	0	0	2	0	0	0	0	0	0	0	0
21ur-2121	0	0	0	0	0	0	0	0	0	0	0	0	0	0	0	0	1
21ur-2124	0	1	0	0	2	1	2	0	0	0	0	0	0	1	0	0	0
21ur-2127	0	0	0	0	0	0	0	0	0	3	0	0	0	0	0	0	0
21ur-2132	1	0	0	0	0	0	0	0	0	0	0	1	1	0	0	0	0
21ur-2133	0	0	0	0	0	0	0	0	0	0	0	0	1	0	0	0	0
21ur-2136	0	0	0	0	0	0	1	0	1	1	0	0	1	0	0	0	1
21ur-2138	1	0	0	0	0	0	0	0	0	1	0	0	0	0	0	0	0
21ur-2139	0	0	0	0	0	0	0	0	0	0	0	0	0	0	0	0	1
21ur-214	0	0	1	0	0	0	3	0	0	2	0	0	0	0	0	0	0
21ur-2140	0	0	0	0	0	1	0	0	0	0	0	0	0	0	0	0	0
21ur-2144	0	0	0	0	0	0	1	0	0	0	0	0	0	0	0	0	0
21ur-2149	0	0	0	0	0	0	1	0	0	0	0	0	0	0	0	0	0
21ur-2150	0	0	1	0	0	0	0	0	0	0	0	0	0	0	0	0	0
21ur-2151	0	0	0	0	0	0	0	0	0	2	0	0	0	0	0	0	0
21ur-2152	1	0	0	0	0	0	0	0	0	0	0	0	0	0	0	0	0
21ur-2153	0	0	0	1	0	0	0	0	2	1	0	0	0	0	0	0	0
21ur-2156	1	0	0	0	0	0	0	0	0	0	0	0	0	0	0	0	0
21ur-2158	0	0	3	0	0	0	0	0	1	1	0	0	2	0	0	0	0
21ur-2164	0	0	0	0	0	0	0	0	1	0	0	0	0	0	0	0	0
21ur-2165	0	0	0	0	0	0	1	0	0	0	0	0	0	0	0	0	0
21ur-2170	0	0	2	0	0	0	0	0	0	0	0	0	0	0	0	0	0
21ur-2172	0	0	0	0	0	1	2	0	0	0	0	0	1	0	0	0	2
21ur-2174	0	0	0	0	1	0	2	0	0	0	0	0	0	0	0	0	0
21ur-2179	0	0	0	0	0	0	0	0	0	1	0	0	1	0	0	0	0
21ur-2183	0	0	0	0	0	0	0	0	0	1	0	0	0	0	1	0	2
21ur-2189	0	0	0	0	0	0	0	0	0	1	0	0	0	0	0	0	0
21ur-2190	0	0	0	0	0	0	0	0	0	2	0	0	0	0	0	0	0
21ur-2191	0	0	0	0	0	0	0	0	0	0	0	0	1	0	0	0	0
21ur-2193	0	0	0	0	0	1	0	0	0	1	0	0	1	0	0	0	0
21ur-2194	0	0	0	0	0	0	0	0	0	1	0	0	0	0	0	0	0
21ur-2195	0	0	0	0	0	0	0	0	0	0	0	1	1	0	0	0	0
21ur-2196	0	0	0	0	0	0	0	0	1	0	0	0	0	0	0	0	0
21ur-22	0	0	0	0	0	0	1	0	0	0	0	0	0	0	0	0	0
21ur-2200	0	0	2	1	0	0	0	0	0	0	0	0	0	0	0	0	0
21ur-2201	0	0	0	1	0	0	0	0	0	0	0	0	3	0	0	0	0
21ur-2203	0	0	0	0	0	0	0	0	0	0	0	0	0	0	0	0	1
21ur-2205	0	0	0	0	0	0	0	0	1	0	0	0	0	0	0	0	0
21ur-2206	2	2	1	1	1	2	1	1	3	1	1	6	2	1	0	4	1
21ur-2210	0	0	0	0	0	0	0	0	0	0	0	0	1	0	0	0	0
21ur-2212	0	0	0	0	3	1	7	1	1	1	0	1	0	0	0	0	0
21ur-2213	0	0	1	0	0	0	1	0	0	0	0	0	0	0	0	0	0
21ur-2219	0	1	0	0	0	0	0	0	0	0	0	0	2	0	0	0	0
21ur-222	0	1	0	1	0	0	0	0	0	0	0	0	0	0	0	0	0
21ur-2220	0	0	0	0	0	0	0	0	1	0	0	0	0	0	0	0	0
21ur-2226	0	0	2	0	1	1	4	1	2	2	1	1	0	0	0	4	2
21ur-2227	0	0	0	0	0	0	0	0	0	0	0	0	0	0	0	0	1
21ur-2229	0	0	0	0	0	0	0	0	0	1	0	0	0	0	0	0	0
21ur-223	0	0	0	0	0	0	1	0	0	0	0	0	0	0	0	0	0
21ur-2236	0	0	0	0	1	0	0	0	0	0	1	0	0	0	0	0	0
21ur-2238	1	0	0	0	0	0	0	0	0	0	0	0	0	0	0	0	0
21ur-2239	0	0	0	0	0	0	1	0	0	0	0	0	0	0	0	0	0
21ur-224	1	0	0	0	0	0	0	0	0	0	0	0	0	0	0	0	0
21ur-2242	0	0	0	0	0	0	0	0	0	1	0	0	0	0	0	0	0
21ur-2245	0	0	4	0	0	0	0	0	0	0	0	0	0	0	0	0	0
21ur-2247	1	0	0	0	0	0	0	0	0	0	0	0	0	0	0	0	0
21ur-2248	0	0	0	0	0	0	0	0	0	0	0	1	0	0	0	0	0
21ur-2251	0	0	1	0	0	0	0	0	0	0	0	0	0	0	0	0	0
21ur-2255	0	0	0	0	0	0	0	0	0	1	0	0	0	0	0	0	0
21ur-2256	1	0	0	0	0	0	4	0	0	0	0	0	1	0	0	0	0
21ur-2257	2	0	0	0	0	0	0	0	0	0	0	0	0	0	0	0	2
21ur-2258	0	0	0	0	0	0	0	0	0	0	0	0	0	0	0	0	1
21ur-2259	0	0	0	1	0	0	0	0	0	0	0	0	0	0	0	0	0
21ur-2260	0	0	0	2	0	0	1	0	2	1	0	0	1	0	0	0	0
21ur-2262	0	0	0	0	0	0	0	0	1	2	0	0	0	0	0	0	0
21ur-2270	0	0	3	0	0	0	0	0	0	0	0	0	0	0	0	0	0
21ur-2271	0	0	0	0	0	0	0	0	0	1	0	0	0	0	0	0	1
21ur-2275	0	0	1	1	0	0	0	0	0	0	0	0	0	0	0	0	0
21ur-2276	0	0	0	0	0	0	0	0	1	0	0	0	0	0	0	0	1
21ur-2277	0	0	0	0	0	0	2	0	0	0	0	0	0	0	0	0	0
21ur-2284	0	0	0	0	0	0	0	0	0	0	0	0	2	0	0	0	0
21ur-2285	0	0	0	1	0	0	0	0	0	0	0	0	0	0	0	0	0
21ur-2286	0	0	0	0	0	0	0	0	0	1	0	0	0	0	0	0	0
21ur-2287	0	0	0	1	0	0	0	0	0	0	0	0	0	0	0	0	0
21ur-2288	0	0	0	0	0	0	0	0	0	0	0	0	0	0	0	0	3
21ur-2290	0	0	0	0	0	0	0	0	0	0	0	0	0	0	0	0	1
21ur-2298	0	0	0	0	2	0	1	0	0	0	0	0	0	0	0	0	1
21ur-2300	0	0	0	0	0	0	0	0	0	0	1	0	1	0	0	0	0
21ur-2302	0	0	0	0	1	0	0	0	0	1	0	0	0	0	0	0	0
21ur-2305	0	0	0	0	0	1	0	0	0	1	0	0	0	0	0	0	0
21ur-2306	0	0	0	0	0	0	0	0	0	0	0	0	0	0	0	1	0
21ur-2309	0	0	0	0	0	0	0	0	0	1	0	0	0	0	0	0	0
21ur-2314	0	0	0	0	0	0	0	0	0	0	0	0	2	0	0	0	0
21ur-2317	0	0	1	0	0	1	0	1	0	0	0	0	0	0	0	0	1
21ur-2318	0	0	0	0	0	0	0	0	0	1	0	0	0	0	0	0	0
21ur-2323	0	0	0	0	0	0	0	0	0	1	0	0	0	0	0	0	0
21ur-2326	0	0	0	0	0	0	0	0	0	0	0	0	1	0	0	0	0
21ur-2327	0	1	2	0	0	0	1	0	1	1	0	2	0	0	0	0	0
21ur-2329	0	1	2	0	1	1	0	0	0	0	0	1	0	0	0	0	0
21ur-233	0	0	0	0	0	1	1	0	1	0	0	0	0	0	0	0	0
21ur-2330	1	0	0	1	0	0	0	0	0	0	0	0	0	0	0	0	0
21ur-2331	0	0	0	0	0	0	0	0	0	0	0	0	1	0	0	0	0
21ur-2333	0	0	0	0	0	0	1	0	0	0	0	0	0	0	0	0	0
21ur-2335	0	0	0	0	0	0	0	0	0	1	0	0	0	0	0	0	0
21ur-234	3	0	0	0	0	0	0	0	0	0	0	0	0	0	0	0	0
21ur-2346	0	0	0	0	0	0	0	0	0	0	0	0	1	1	0	0	0
21ur-2347	0	0	0	0	0	0	0	0	1	0	0	0	0	0	0	0	0
21ur-2348	0	1	0	0	1	0	0	0	0	0	0	0	1	0	0	0	0
21ur-2351	0	0	1	0	0	0	0	0	0	0	0	0	0	0	0	0	0
21ur-2354	0	0	0	0	0	0	1	1	0	0	0	0	0	0	0	0	0
21ur-2356	0	0	0	0	0	0	0	0	0	1	0	0	0	0	0	0	0
21ur-2358	0	0	0	0	0	1	0	0	0	0	0	0	0	0	0	0	0
21ur-2364	0	0	0	0	0	0	0	0	0	0	1	0	0	0	0	0	0
21ur-2366	0	0	1	0	0	0	0	0	0	0	0	1	0	0	0	0	0
21ur-2375	0	0	0	0	0	1	0	0	0	2	0	0	0	0	0	0	0
21ur-2376	0	0	0	0	0	0	0	0	0	0	0	0	1	0	0	0	0
21ur-2378	0	0	0	0	0	0	0	0	0	1	0	0	0	0	0	0	0
21ur-2384	0	0	0	0	0	0	0	0	0	0	0	0	1	0	0	0	0
21ur-2392	0	0	0	0	0	0	0	0	0	0	0	0	0	0	0	0	1
21ur-2394	0	0	0	0	0	0	0	0	0	0	0	0	1	0	0	0	0
21ur-2396	1	0	1	0	0	0	0	0	1	0	0	0	1	0	0	0	0
21ur-2397	0	0	0	0	0	0	0	0	0	0	0	0	1	0	0	0	0
21ur-2400	1	2	1	1	1	0	0	0	1	0	0	4	0	0	1	2	1
21ur-2402	0	0	0	0	0	0	0	0	0	3	0	0	1	0	0	0	0
21ur-2414	0	0	0	0	0	0	0	0	0	0	0	0	1	0	0	0	0
21ur-2421	0	0	0	0	0	0	0	0	0	3	0	0	0	0	0	0	0
21ur-2426	0	0	0	0	0	0	0	0	0	0	0	0	1	0	0	0	1
21ur-2427	0	0	0	0	0	0	2	1	0	0	0	0	0	0	0	0	0
21ur-2432	0	0	0	0	0	0	1	0	0	0	0	0	0	0	0	0	0
21ur-2434	0	0	3	1	2	0	2	0	1	0	0	0	0	0	0	0	6
21ur-2436	0	0	0	0	0	0	0	0	0	0	0	0	0	0	2	0	1
21ur-2439	0	0	0	0	0	0	0	0	0	1	0	0	1	0	0	0	0
21ur-2443	0	0	0	0	0	0	0	0	0	0	0	0	1	0	0	0	0
21ur-2445	0	0	0	0	0	0	0	0	0	1	0	0	1	0	0	0	0
21ur-2447	0	0	0	0	0	0	2	0	0	0	0	0	0	0	0	0	0
21ur-2448	1	0	0	0	0	0	0	0	1	2	0	0	0	0	0	0	0
21ur-245	0	0	0	0	0	0	0	0	0	1	0	0	0	0	0	0	0
21ur-2456	0	0	0	0	0	0	0	0	0	1	0	0	0	0	0	0	0
21ur-2458	0	0	0	0	0	0	0	0	0	1	0	0	0	0	0	0	0
21ur-246	0	0	0	0	0	0	0	0	0	0	0	1	0	0	0	0	0
21ur-2461	0	0	0	0	0	0	0	0	1	0	0	0	0	0	0	0	0
21ur-2462	1	0	0	0	0	0	0	0	0	0	0	0	0	0	0	0	0
21ur-2469	1	2	0	0	0	0	1	0	0	0	0	0	0	0	0	0	0
21ur-2470	0	0	0	0	0	0	0	0	0	0	0	0	0	0	0	1	0
21ur-2474	0	0	0	0	0	0	0	0	0	2	0	0	0	0	0	0	0
21ur-2478	0	0	0	2	0	0	0	0	0	0	0	0	0	0	0	0	0
21ur-248	0	0	0	0	0	0	0	0	1	0	0	0	0	0	0	0	0
21ur-2482	0	0	0	1	0	0	0	0	0	0	0	0	0	0	0	0	0
21ur-2483	0	0	0	2	0	0	1	0	0	0	0	0	0	0	0	0	0
21ur-2496	0	0	0	0	0	0	0	0	1	0	0	0	0	0	0	0	0
21ur-250	0	0	0	0	0	0	0	0	2	0	0	0	0	0	0	0	0
21ur-2500	0	0	1	0	0	0	0	0	0	2	0	1	0	2	0	0	0
21ur-2502	0	0	0	0	0	0	1	0	0	0	0	0	0	0	0	0	0
21ur-2507	0	0	0	0	0	0	1	0	0	0	0	1	0	0	0	0	0
21ur-2508	0	0	1	0	6	7	2	1	4	3	0	2	0	0	0	0	0
21ur-251	0	0	0	0	0	0	0	0	0	1	0	0	0	0	0	0	0
21ur-2515	0	0	0	0	0	0	0	0	0	1	0	0	0	0	0	0	0
21ur-2516	0	0	0	0	0	0	0	0	1	0	0	0	0	0	0	0	2
21ur-252	2	3	5	4	10	5	13	3	6	16	1	5	5	7	2	3	11
21ur-2528	0	0	0	0	0	0	0	0	0	0	0	0	1	0	0	0	0
21ur-2530	0	0	0	0	0	0	0	0	0	0	0	0	1	0	0	0	0
21ur-2534	0	0	1	0	0	0	2	0	0	0	0	0	0	0	0	0	0
21ur-2543	1	0	1	0	0	0	0	0	0	0	0	0	0	0	0	0	0
21ur-2544	0	0	0	0	0	1	0	0	0	0	0	0	0	0	0	0	0
21ur-2545	0	0	0	0	0	0	0	1	0	0	0	0	0	0	0	0	0
21ur-2546	0	0	0	0	0	0	0	0	0	0	0	0	1	0	0	0	0
21ur-2548	0	0	0	0	0	0	1	0	0	0	0	0	0	0	0	0	0
21ur-2549	0	0	0	0	0	0	0	0	0	0	2	0	0	0	0	0	2
21ur-255	1	0	0	0	0	0	0	0	0	0	0	0	0	0	0	0	0
21ur-2555	0	0	0	0	0	1	0	0	0	0	0	0	0	0	0	0	0
21ur-2558	0	0	0	0	0	0	0	0	0	2	0	1	0	0	0	0	0
21ur-256	0	0	0	0	0	0	2	0	0	0	0	0	1	0	0	0	0
21ur-2566	0	0	0	0	0	0	0	0	1	0	0	0	0	0	0	0	0
21ur-2567	0	0	0	0	0	0	0	0	0	0	0	1	0	0	0	0	0
21ur-257	1	0	0	0	0	0	1	0	0	0	0	0	0	0	0	0	0
21ur-2570	0	1	0	0	0	0	0	0	0	0	0	0	0	0	0	0	0
21ur-2571	0	0	0	0	0	0	0	0	0	1	0	0	0	0	0	0	0
21ur-2573	0	0	0	0	0	0	1	0	0	0	0	0	0	0	0	0	1
21ur-2574	0	0	0	0	0	0	0	0	0	0	0	0	0	0	0	0	1
21ur-2576	0	0	0	0	0	0	0	0	0	1	0	0	0	1	0	0	1
21ur-258	1	0	0	0	0	0	0	0	0	0	0	0	0	0	0	0	0
21ur-2580	1	0	0	0	0	0	0	0	0	0	0	0	1	0	0	0	0
21ur-2588	0	0	1	0	1	0	1	0	0	2	0	0	0	0	0	0	0
21ur-2594	0	0	0	0	0	0	0	0	0	1	0	0	0	0	0	0	0
21ur-2595	0	0	0	0	0	1	0	0	0	0	0	0	0	0	0	0	0
21ur-2597	0	0	0	0	0	0	0	0	0	0	0	1	0	0	0	0	0
21ur-2598	0	0	0	0	0	0	0	0	0	0	0	0	0	0	0	0	1
21ur-2603	0	0	0	0	0	0	0	0	0	0	0	0	0	0	0	0	1
21ur-2604	2	0	4	3	0	0	3	0	3	1	0	3	0	0	1	0	1
21ur-2607	2	0	0	0	0	0	0	0	0	0	0	0	3	0	0	0	0
21ur-2611	0	0	1	1	0	0	0	0	1	0	0	1	1	0	0	0	0
21ur-2612	0	0	0	0	0	0	1	0	0	0	0	0	0	0	0	0	0
21ur-2613	0	1	0	0	0	0	0	0	1	0	0	0	0	0	0	0	1
21ur-2616	0	0	0	0	0	0	0	0	1	0	0	0	0	0	0	0	0
21ur-2617	0	0	0	0	0	0	0	0	0	1	0	0	0	0	0	0	0
21ur-2619	0	1	0	0	0	2	0	0	0	0	0	0	0	0	0	0	0
21ur-2620	0	0	0	0	0	0	1	0	0	0	0	0	0	0	0	0	0
21ur-2628	0	0	0	0	0	0	0	0	0	1	0	0	1	0	0	0	0
21ur-2633	0	0	0	0	0	0	0	0	0	1	0	0	0	0	0	0	0
21ur-2637	0	0	0	0	0	0	0	0	0	1	0	0	0	0	0	0	0
21ur-2638	0	0	0	0	0	0	0	0	0	0	0	0	0	0	0	0	1
21ur-264	0	0	0	0	0	0	0	0	0	0	0	0	0	0	0	0	1
21ur-2640	0	0	0	0	0	0	0	0	0	0	0	1	0	0	0	0	0
21ur-2641	0	0	0	0	0	0	0	0	0	1	0	0	0	0	0	0	0
21ur-2644	0	0	0	0	0	0	0	0	0	0	1	0	0	0	0	0	0
21ur-2648	0	0	0	0	0	0	0	0	0	0	0	0	0	1	0	0	0
21ur-2649	1	0	1	0	4	4	5	5	10	7	1	1	1	1	1	1	2
21ur-265	0	0	0	0	0	0	0	0	0	0	0	0	0	0	0	0	1
21ur-2651	0	0	0	0	0	0	0	0	1	0	0	0	0	0	0	1	0
21ur-2652	0	0	0	0	0	0	0	0	0	1	0	0	0	0	0	0	0
21ur-2655	2	0	0	0	0	2	1	0	0	0	0	0	0	0	0	0	0
21ur-2656	0	0	0	0	0	0	1	0	0	0	0	0	0	0	0	0	0
21ur-2659	0	0	0	0	0	0	0	0	0	1	0	0	0	0	0	0	0
21ur-2660	0	0	0	0	0	0	0	0	0	0	2	0	0	0	0	0	0
21ur-2661	1	0	0	0	0	1	1	0	0	0	0	0	0	0	0	0	0
21ur-2666	0	0	0	0	0	1	0	0	0	0	0	0	0	0	0	0	0
21ur-2667	3	5	7	7	5	2	4	2	5	6	3	11	4	0	3	3	7
21ur-2669	0	1	0	0	0	0	0	0	0	0	0	0	0	0	0	0	0
21ur-2670	0	0	0	0	0	0	0	0	1	0	0	0	0	1	0	1	1
21ur-2671	1	0	0	0	0	0	0	0	0	1	0	0	0	0	0	0	0
21ur-2673	1	0	0	0	0	0	0	0	0	0	0	0	1	0	0	0	0
21ur-2677	0	0	0	0	0	0	0	0	1	0	0	0	0	0	0	0	0
21ur-2679	0	0	0	0	0	0	0	0	0	1	0	0	0	0	0	0	0
21ur-2681	0	0	0	0	0	0	1	0	0	0	0	0	0	0	0	0	0
21ur-2683	0	0	0	0	0	0	0	0	0	1	0	0	0	0	0	0	0
21ur-2685	0	0	0	0	0	0	0	0	1	0	0	0	0	0	0	0	0
21ur-2691	0	0	0	0	1	0	0	0	0	0	0	0	0	0	0	0	0
21ur-2694	0	0	0	0	0	1	0	0	0	0	0	0	0	0	0	0	0
21ur-2697	0	0	0	0	0	0	0	0	1	0	0	0	0	0	0	0	0
21ur-27	0	0	1	2	0	0	0	0	2	0	0	0	2	0	0	0	0
21ur-270	0	0	0	0	0	0	0	0	0	1	0	0	0	0	0	0	0
21ur-2704	0	0	1	0	0	0	0	0	0	0	0	0	0	0	0	0	0
21ur-2705	0	0	1	0	0	0	0	0	0	0	0	0	0	0	0	0	0
21ur-2709	0	0	0	0	0	0	0	0	0	0	0	0	0	0	0	0	1
[truncated: 28,465 more rows]

## Sheet: counttable_smartseq
	nos-1/2_emb_25_Slee80.genecount	nos-1/2_emb_25_Slee81.genecount	nos-1/2_emb_25_Slee82.genecount	nos-1/2_L1_25_Slee85.genecount	nos-1/2_L1_25_Slee86.genecount	WT_emb_25_Slee78.genecount	WT_emb_25_Slee79.genecount	WT_L1_25_Slee83.genecount	WT_L1_25_Slee84.genecount
21ur-1001	0	2	0	3	0	0	3	0	0
21ur-10011	0	0	0	0	0	1	0	0	0
21ur-10023	0	10	0	0	0	1	0	0	0
21ur-1004	0	1	0	0	0	0	0	0	0
21ur-10054	0	0	0	0	0	0	3	0	0
21ur-10056	0	0	0	0	0	0	0	3	0
21ur-10065	2	12	3	5	1	1	0	0	0
21ur-10081	0	0	0	0	0	2	0	0	0
21ur-10082	0	0	2	0	0	5	1	0	0
21ur-10101	0	0	0	2	0	0	0	0	0
21ur-10115	0	0	1	0	0	0	0	0	0
21ur-10116	0	0	0	0	0	0	3	0	0
21ur-10124	0	0	0	0	0	0	0	2	0
21ur-1014	0	0	0	0	0	1	0	0	0
21ur-1015	0	0	0	2	0	0	0	0	0
21ur-10150	0	0	0	0	0	5	0	0	0
21ur-10153	53	92	110	123	113	53	21	3	0
21ur-10155	0	0	0	1	0	0	0	0	0
21ur-10158	0	0	0	2	0	0	0	0	0
21ur-10164	0	0	0	0	0	0	0	1	0
21ur-10171	0	0	0	0	0	0	0	1	0
21ur-10176	16	0	4	3	1	4	4	3	5
21ur-10180	0	0	0	0	0	0	1	0	0
21ur-10181	0	3	0	0	0	0	0	3	0
21ur-10208	0	7	8	0	1	18	0	0	0
21ur-10216	0	0	3	0	0	0	1	0	0
21ur-1022	0	0	0	0	1	0	0	0	2
21ur-1023	0	0	1	0	0	0	0	0	0
21ur-10246	0	0	0	0	1	0	0	0	0
21ur-10248	0	2	0	0	4	0	0	0	0
21ur-1028	0	0	0	1	0	0	0	0	0
21ur-10289	0	0	0	0	2	0	0	0	0
21ur-10303	0	0	0	0	0	0	0	0	2
21ur-10305	14	0	0	0	0	0	0	0	0
21ur-10306	0	0	0	0	0	3	0	0	0
21ur-10311	0	0	0	0	0	0	2	0	0
21ur-10341	0	1	4	0	0	0	0	0	0
21ur-10342	0	0	0	0	0	4	0	0	0
21ur-10350	0	4	0	0	0	1	5	0	0
21ur-1036	0	0	2	0	0	0	0	0	0
21ur-10365	0	2	0	0	0	0	0	0	0
21ur-1037	0	0	0	0	0	0	0	2	0
21ur-10373	0	0	0	0	0	0	0	2	0
21ur-10376	0	0	0	0	0	1	0	0	0
21ur-10378	0	0	0	0	0	1	0	0	0
21ur-10382	0	0	4	0	0	0	0	0	0
21ur-10387	0	0	0	0	0	0	0	2	0
21ur-10389	0	0	0	0	0	0	0	2	0
21ur-10392	0	8	2	1	3	0	9	1	0
21ur-104	0	4	2	0	0	6	0	0	0
21ur-10402	0	0	0	1	1	0	0	0	0
21ur-10404	0	0	0	0	0	1	0	0	2
21ur-1041	0	0	0	0	0	1	0	0	0
21ur-10410	0	6	0	0	0	0	0	0	0
21ur-10433	0	0	0	4	0	0	0	0	0
21ur-10434	0	0	0	0	0	3	0	0	0
21ur-10447	0	2	0	0	0	0	0	11	0
21ur-10474	0	0	0	0	0	0	0	0	2
21ur-10478	0	0	0	3	3	0	0	0	0
21ur-10487	0	0	0	1	0	0	2	4	0
21ur-10512	0	0	0	0	2	0	0	1	0
21ur-10518	0	0	3	0	0	0	0	0	0
21ur-10521	0	0	0	0	1	0	0	0	0
21ur-10542	0	0	3	0	0	0	1	0	1
21ur-1055	0	0	3	0	0	0	0	0	0
21ur-10550	6	0	0	0	0	0	0	0	0
21ur-10556	0	0	0	1	0	0	0	5	0
21ur-1058	0	0	0	0	0	0	0	2	0
21ur-10581	0	0	0	0	0	0	0	0	3
21ur-10597	0	0	0	4	0	0	2	0	0
21ur-10600	0	0	0	4	2	0	4	7	4
21ur-10606	0	0	0	0	2	1	0	0	0
21ur-10612	0	0	0	2	3	0	0	0	0
21ur-10633	0	0	0	1	0	0	0	0	0
21ur-10634	0	0	0	1	1	3	0	0	5
21ur-10636	0	0	0	0	0	1	0	3	0
21ur-10646	0	0	0	0	0	0	2	0	0
21ur-10658	0	0	1	0	0	0	0	0	0
21ur-10676	0	0	0	4	0	0	0	10	0
21ur-10677	0	0	3	0	0	0	0	5	0
21ur-10679	0	1	0	0	0	0	0	0	0
21ur-10686	0	0	0	1	1	4	5	0	0
21ur-10690	0	0	0	0	0	1	0	0	0
21ur-10693	0	0	0	0	0	1	0	0	5
21ur-10694	0	5	9	5	5	5	0	0	0
21ur-10695	0	0	0	2	2	0	0	0	0
21ur-1070	0	0	0	5	0	0	0	0	0
21ur-10700	0	0	0	0	0	0	5	0	0
21ur-10715	0	0	0	0	0	0	2	0	0
21ur-10720	0	0	0	0	0	0	5	0	0
21ur-10733	0	0	0	0	0	3	0	0	0
21ur-10739	0	0	1	0	0	0	0	0	0
21ur-10763	0	8	2	0	2	0	17	0	0
21ur-10767	0	0	0	0	0	0	0	3	0
21ur-10778	0	0	5	0	0	0	0	0	0
21ur-1078	0	0	0	0	1	0	0	0	0
21ur-10785	0	0	0	0	0	0	0	0	1
21ur-10787	0	0	0	1	0	0	0	0	0
21ur-10788	0	0	0	0	0	1	0	3	0
21ur-1079	20	0	0	0	0	0	0	0	0
21ur-10802	0	3	0	0	0	0	0	0	0
21ur-10809	0	0	0	0	0	0	1	0	0
21ur-10813	0	0	0	1	0	0	0	0	0
21ur-10816	0	0	0	0	0	3	0	0	0
21ur-10817	0	0	0	1	0	0	0	0	0
21ur-1082	0	0	0	0	0	0	0	3	0
21ur-10824	0	9	0	0	2	0	0	4	0
21ur-10829	0	0	0	0	0	0	0	0	9
21ur-10851	0	0	0	0	0	5	0	0	0
21ur-10857	0	0	0	1	0	0	0	0	0
21ur-10871	0	0	0	0	0	0	0	1	0
21ur-10885	0	0	1	0	0	0	0	0	0
21ur-10890	0	0	0	4	0	0	0	0	0
21ur-10898	0	0	2	0	0	0	0	0	0
21ur-10909	0	0	0	0	0	1	0	0	0
21ur-1091	0	0	0	9	0	1	0	0	0
21ur-10927	0	28	12	2	0	10	0	0	1
21ur-1094	0	0	0	0	0	1	0	0	0
21ur-10957	0	7	0	1	0	0	4	5	1
21ur-10989	0	3	0	0	0	0	0	1	1
21ur-10998	0	0	4	0	0	0	0	2	0
21ur-11007	0	0	0	1	0	0	0	0	0
21ur-1101	0	0	0	0	0	0	1	0	0
21ur-11010	0	0	0	0	0	0	6	0	0
21ur-11021	0	0	0	0	0	1	0	0	0
21ur-11025	0	0	0	0	0	0	6	0	0
21ur-11052	0	0	0	0	0	0	1	0	0
21ur-1106	0	0	1	0	0	0	0	0	0
21ur-11063	18	0	0	0	0	0	0	0	0
21ur-11064	5	7	7	0	3	1	0	0	0
21ur-11079	0	0	0	0	0	4	1	0	0
21ur-11088	0	0	0	2	4	0	0	0	0
21ur-11090	0	0	0	0	0	10	0	0	0
21ur-11100	0	0	0	3	2	0	0	84	42
21ur-11102	0	0	0	0	0	4	2	3	0
21ur-11118	0	0	0	0	0	0	0	0	3
21ur-11141	0	0	1	0	0	0	0	0	0
21ur-1115	0	0	0	0	2	0	0	0	0
21ur-11175	0	0	0	0	0	0	3	0	0
21ur-11186	0	0	0	0	0	0	0	0	2
21ur-11205	0	3	0	0	0	0	0	0	0
21ur-11223	0	0	0	0	1	0	0	0	0
21ur-11233	0	3	2	0	0	0	3	0	0
21ur-1124	0	0	0	0	0	2	0	0	0
21ur-11243	0	0	0	0	0	0	0	0	5
21ur-11261	0	5	0	0	0	3	0	0	0
21ur-11266	0	0	0	0	1	0	9	0	0
21ur-11279	0	22	15	0	0	31	23	0	0
21ur-11280	0	0	0	0	0	0	0	1	0
21ur-11282	0	0	0	0	0	1	0	0	4
21ur-11285	0	0	0	2	0	0	0	0	0
21ur-11291	0	1	2	0	1	0	0	0	5
21ur-11296	0	0	0	0	0	0	0	7	0
21ur-11316	4	3	0	4	0	3	2	28	11
21ur-11328	0	0	0	0	0	0	0	0	1
21ur-1133	0	3	0	4	0	14	3	41	15
21ur-1134	0	2	0	0	0	0	0	0	0
21ur-11358	0	0	0	0	0	1	0	0	0
21ur-11363	0	0	0	0	1	0	0	3	0
21ur-11371	0	0	0	0	0	0	2	0	0
21ur-11376	16	0	1	0	0	0	3	0	0
21ur-11381	0	0	0	0	0	1	0	0	0
21ur-11426	26	0	0	0	0	0	0	0	0
21ur-11432	0	0	0	0	3	0	0	0	0
21ur-11433	0	0	0	0	0	4	0	0	2
21ur-11435	0	0	0	0	2	0	0	0	0
21ur-11436	0	0	0	0	0	1	0	0	0
21ur-1145	0	0	0	4	0	2	0	0	0
21ur-11450	0	0	4	0	0	0	0	0	0
21ur-11454	0	0	4	0	0	28	1	0	0
21ur-11457	0	0	0	0	0	0	0	4	0
21ur-11466	0	0	0	2	0	0	0	0	0
21ur-11469	0	0	0	0	2	0	0	0	0
21ur-11474	0	0	0	0	0	1	1	0	0
21ur-11476	0	0	0	0	0	3	0	0	0
21ur-11488	0	0	0	1	0	0	4	2	0
21ur-115	0	5	0	0	0	0	9	3	1
21ur-11507	0	0	1	0	0	0	0	0	0
21ur-11512	0	0	0	0	0	0	2	0	0
21ur-1152	0	0	0	0	0	1	0	0	0
21ur-11529	0	0	0	0	0	1	0	1	5
21ur-11547	0	0	0	0	0	3	0	0	0
21ur-11548	0	3	0	1	0	4	0	0	0
21ur-11549	0	0	0	1	0	0	0	0	0
21ur-1157	0	0	6	0	0	0	0	0	0
21ur-11570	0	1	0	0	0	0	0	0	0
21ur-11585	0	5	1	5	0	13	2	5	6
21ur-11602	0	0	0	1	0	0	0	0	0
21ur-11604	0	9	0	0	0	5	3	0	0
21ur-11605	0	0	1	0	0	0	0	0	0
21ur-11607	0	0	0	4	0	0	0	2	0
21ur-11612	0	0	2	0	0	3	0	0	0
21ur-11613	0	0	0	0	0	0	3	0	0
21ur-11631	0	0	0	0	1	0	0	0	0
21ur-11636	0	8	0	1	1	0	0	0	0
21ur-11646	0	1	0	0	2	0	2	0	0
21ur-11648	0	0	5	0	0	1	1	0	0
21ur-11653	0	0	3	0	0	0	0	0	0
21ur-11662	0	0	4	0	0	2	0	0	0
21ur-11702	0	0	0	2	0	0	0	0	0
21ur-11703	0	0	0	0	0	2	0	0	0
21ur-11706	0	0	0	1	1	0	0	0	0
21ur-11711	0	0	0	0	0	4	0	0	0
21ur-11720	0	0	2	0	0	0	0	0	0
21ur-1173	0	0	0	0	0	1	0	0	3
21ur-11730	0	0	2	6	0	0	2	4	0
21ur-11737	0	17	0	0	2	1	0	0	0
21ur-11745	0	0	1	0	0	0	0	0	0
21ur-11752	0	0	0	0	0	0	4	0	0
21ur-1177	0	0	1	0	0	0	0	0	0
21ur-11771	0	0	0	0	0	0	5	4	0
21ur-11774	0	0	3	0	2	0	0	0	0
21ur-11781	0	1	0	0	0	0	0	0	0
21ur-11786	0	0	0	0	0	3	0	0	0
21ur-11815	0	0	0	0	0	0	0	3	0
21ur-11824	0	5	0	0	0	0	0	0	0
21ur-11825	0	0	4	0	0	0	1	0	0
21ur-11829	0	1	0	0	0	0	5	0	0
21ur-11834	0	0	0	0	0	0	0	1	0
21ur-11837	0	6	5	0	0	2	0	0	0
21ur-11845	0	0	2	0	0	0	0	3	0
21ur-11854	4	0	0	0	0	0	1	1	9
21ur-11856	0	0	0	0	0	0	0	2	0
21ur-11860	0	3	9	0	0	2	2	33	12
21ur-11864	28	0	0	0	0	0	0	0	0
21ur-11866	0	0	5	1	0	0	5	0	0
21ur-11887	0	0	0	0	0	0	3	0	0
21ur-11892	0	0	0	0	1	0	0	0	0
21ur-11897	23	15	22	0	0	16	6	0	0
21ur-11900	0	6	0	0	0	1	4	0	0
21ur-11902	0	0	0	0	0	0	0	1	0
21ur-1191	0	0	0	1	0	0	0	0	0
21ur-11927	0	1	0	0	0	0	0	0	0
21ur-11928	0	0	7	0	0	0	0	0	0
21ur-11933	0	0	0	3	0	0	0	6	3
21ur-11947	0	0	0	0	0	0	0	2	0
21ur-11955	0	0	0	0	1	0	0	0	0
21ur-11977	0	0	0	0	0	0	0	2	0
21ur-11982	0	2	0	0	0	0	0	0	0
21ur-11984	0	0	0	0	2	0	0	0	0
21ur-12029	0	0	1	0	0	0	0	0	0
21ur-12040	0	0	0	0	0	1	0	0	0
21ur-12053	0	0	0	3	0	0	0	0	0
21ur-12067	0	2	0	0	0	0	1	0	0
21ur-1207	0	0	0	0	0	0	2	3	0
21ur-12080	0	0	0	0	0	0	0	0	2
21ur-12105	0	1	0	3	0	0	0	0	0
21ur-12110	23	0	0	0	0	0	1	0	0
21ur-12113	0	0	1	0	0	0	0	0	0
21ur-12125	0	0	0	0	0	0	0	4	0
21ur-12132	0	0	0	0	0	1	0	0	0
21ur-12135	0	0	0	0	0	0	0	2	0
21ur-12149	0	0	0	0	0	1	4	0	0
21ur-12156	0	0	0	0	0	2	0	0	0
21ur-12161	0	0	0	0	0	2	0	0	0
21ur-12174	0	0	0	0	0	2	0	1	0
21ur-12188	19	0	1	0	0	1	1	0	0
21ur-12193	0	0	0	0	0	0	0	1	0
21ur-12198	0	0	0	0	0	0	1	0	0
21ur-12205	29	60	58	11	7	1	14	2	9
21ur-1221	0	0	0	0	0	2	0	0	0
21ur-12219	0	0	0	0	4	0	0	0	0
21ur-12221	0	0	0	0	0	0	2	0	0
21ur-12230	0	0	0	0	0	0	3	0	0
21ur-12233	0	0	1	0	0	0	0	0	0
21ur-12236	0	0	0	0	0	1	0	0	0
21ur-12239	0	0	0	0	0	0	0	1	0
21ur-12247	0	0	0	0	0	4	0	0	0
21ur-1226	0	0	1	0	0	0	0	0	0
21ur-12267	0	0	0	0	0	0	5	8	0
21ur-12279	35	48	25	18	30	9	22	8	18
21ur-12280	0	0	2	0	0	0	0	0	0
21ur-12284	0	0	1	0	0	0	0	0	0
21ur-1229	0	0	0	0	0	0	0	0	3
21ur-123	0	13	0	0	0	4	5	0	0
21ur-12301	0	0	0	0	2	0	2	4	0
21ur-12307	0	0	0	0	0	0	1	0	0
21ur-12313	0	3	0	3	0	1	2	0	0
21ur-12321	0	2	0	0	0	0	2	6	0
21ur-12328	0	0	0	0	0	1	0	0	0
21ur-12336	0	3	0	0	1	0	0	0	0
21ur-12364	0	0	0	3	0	3	0	1	4
21ur-12366	0	0	0	0	0	3	0	0	0
21ur-12374	0	0	0	0	0	0	0	5	0
21ur-12375	0	0	0	0	0	0	0	3	0
21ur-12386	0	0	0	0	4	0	0	0	0
21ur-12405	9	0	0	0	0	0	0	0	0
21ur-12411	0	1	0	0	0	11	0	6	0
21ur-12418	0	0	0	5	0	3	0	0	0
21ur-12442	0	0	0	6	0	0	0	0	0
21ur-12452	0	0	0	0	0	3	0	0	0
21ur-12465	0	0	0	3	4	0	0	0	0
21ur-12468	0	0	1	1	1	0	0	0	0
21ur-1247	0	0	2	0	0	0	0	0	0
21ur-1248	0	0	0	0	0	0	2	0	0
21ur-12490	0	1	0	0	0	0	0	0	0
21ur-12499	0	3	8	5	10	1	3	48	40
21ur-1252	0	0	0	1	0	0	0	0	0
21ur-12535	0	0	0	0	0	5	0	0	0
21ur-12551	0	0	0	0	5	0	0	0	0
21ur-12556	29	20	7	12	20	66	50	42	43
21ur-12558	0	0	0	0	0	0	0	0	1
21ur-12566	0	0	0	0	0	0	0	0	2
21ur-12572	178	355	321	89	88	349	405	41	151
21ur-1258	0	0	2	0	3	0	0	0	0
21ur-12587	0	0	0	0	4	0	0	0	0
21ur-12592	16	0	0	0	0	0	0	0	0
21ur-12593	0	0	0	0	0	0	0	5	0
21ur-12595	0	0	0	0	3	0	0	0	0
21ur-126	0	0	7	0	0	0	1	6	6
21ur-12602	0	2	0	0	0	1	0	0	0
21ur-12648	0	0	0	0	0	0	0	4	0
21ur-12663	0	0	0	0	0	0	0	3	0
21ur-12666	2	0	0	0	0	0	0	0	0
21ur-12672	0	0	2	0	0	2	0	0	0
21ur-12673	0	0	0	0	6	0	0	0	0
21ur-12675	0	0	0	0	0	2	0	0	0
21ur-12680	0	0	0	0	0	0	0	1	0
21ur-12694	0	0	0	1	4	3	0	0	0
21ur-12721	0	0	0	0	0	0	2	0	0
21ur-12722	0	0	4	0	0	0	0	0	0
21ur-12730	0	0	0	0	0	0	0	0	2
21ur-12756	33	48	40	29	32	13	23	34	29
21ur-12758	0	1	2	0	0	0	4	6	0
21ur-12762	0	0	0	0	0	8	4	0	0
21ur-12763	0	3	0	0	0	0	0	0	0
21ur-12769	0	0	0	0	0	1	0	0	0
21ur-1278	0	0	0	2	0	0	0	2	0
21ur-12786	0	0	0	0	0	0	4	0	0
21ur-12798	0	0	0	0	0	1	0	0	0
21ur-12807	0	0	0	0	0	2	0	4	2
21ur-12819	0	0	0	2	0	0	0	0	0
21ur-12821	0	7	0	0	0	0	0	0	0
21ur-12830	209	287	258	188	161	173	104	111	159
21ur-12866	0	0	0	0	0	1	0	0	0
21ur-12889	0	0	0	0	0	0	2	0	0
21ur-1290	0	0	0	0	0	0	2	0	0
21ur-12916	0	0	0	0	0	0	1	0	0
21ur-12934	0	0	0	0	0	1	0	0	0
21ur-12951	0	0	0	1	5	0	0	0	0
21ur-1296	0	0	0	0	0	2	0	0	0
21ur-12969	0	0	0	0	0	5	0	0	0
21ur-12979	0	0	2	0	0	0	0	0	0
21ur-12990	0	1	8	0	0	0	0	0	0
21ur-12996	0	2	0	3	0	4	0	31	18
21ur-130	0	0	0	6	0	17	0	0	0
21ur-13001	0	1	0	0	0	0	0	0	0
21ur-13005	0	0	1	0	0	5	0	0	0
21ur-13011	0	0	0	0	0	6	2	2	0
21ur-13016	0	0	0	0	0	0	0	1	0
21ur-1302	0	0	0	0	0	0	3	13	1
21ur-13032	0	0	0	4	0	0	6	0	0
21ur-13033	0	0	0	0	0	0	2	0	0
21ur-13047	0	0	0	0	0	0	0	1	0
21ur-1305	0	5	0	4	0	0	0	0	2
21ur-13054	0	0	0	1	5	0	1	2	23
21ur-13055	0	0	1	0	0	0	0	0	0
21ur-13058	0	1	0	0	0	0	0	0	0
21ur-13078	0	2	0	0	0	0	0	0	0
21ur-13088	0	0	2	1	2	6	0	10	0
21ur-13104	0	0	0	2	0	0	0	0	0
21ur-13111	0	0	0	0	0	0	0	0	3
21ur-13120	0	0	0	0	0	1	3	0	0
21ur-13121	0	0	0	1	4	0	0	0	0
21ur-13137	0	0	0	0	0	3	0	0	0
21ur-13138	0	0	1	0	0	0	0	0	0
21ur-13147	0	0	0	2	1	0	2	1	0
21ur-13152	0	0	0	0	0	1	0	0	0
21ur-13155	0	0	0	0	0	1	0	0	0
21ur-13163	0	0	0	0	1	0	0	0	0
21ur-13165	0	6	1	0	0	13	0	0	0
21ur-13168	0	0	0	0	0	0	0	5	0
21ur-13175	0	0	0	5	0	3	0	0	0
21ur-13177	0	0	0	0	0	0	1	1	3
21ur-13189	0	1	0	0	0	0	1	0	0
21ur-13197	0	0	0	0	0	1	0	0	1
21ur-13201	0	0	6	0	0	8	0	0	0
21ur-1321	0	0	0	0	0	0	3	7	0
21ur-13214	0	0	1	0	0	0	0	0	0
21ur-13215	0	27	14	31	26	6	16	0	1
21ur-13216	0	0	0	0	0	0	0	2	0
21ur-13227	0	2	0	3	3	3	0	2	0
21ur-13232	0	0	0	0	0	1	0	0	0
21ur-13251	0	0	0	1	0	0	0	3	0
21ur-13254	0	0	0	0	0	0	3	0	0
21ur-13267	0	0	0	0	0	1	0	0	0
21ur-13269	0	0	1	0	0	0	0	0	0
21ur-1327	0	0	0	3	0	0	0	0	0
21ur-13286	0	0	2	0	0	0	0	0	0
21ur-13301	0	5	0	2	0	5	0	15	7
21ur-13307	0	0	0	0	0	6	0	0	0
21ur-13310	0	0	0	0	0	2	0	0	0
21ur-13316	0	0	0	0	0	0	0	3	0
21ur-13327	0	0	0	0	0	1	0	0	7
21ur-1334	0	5	9	0	0	0	1	0	0
21ur-13344	0	0	0	1	0	0	0	2	0
21ur-13368	0	0	3	0	0	0	0	3	0
21ur-1337	0	0	3	0	0	3	0	0	0
21ur-13421	0	0	1	0	0	0	0	0	0
21ur-13424	0	0	0	4	0	2	0	0	0
21ur-13431	17	0	0	0	0	0	0	0	0
21ur-13433	0	1	0	0	0	0	0	0	0
21ur-13438	0	0	0	1	0	0	0	0	0
21ur-13465	0	0	1	0	0	0	0	0	0
21ur-13468	8	0	0	2	1	0	0	0	0
21ur-135	0	0	0	0	0	1	0	0	0
21ur-1350	0	5	0	2	0	0	0	6	2
21ur-13504	0	0	0	1	0	0	0	0	0
21ur-13505	0	0	4	0	0	3	4	0	0
21ur-13510	0	0	0	0	1	0	0	0	0
21ur-13511	0	0	0	0	0	0	0	8	0
21ur-1352	0	0	0	0	0	0	4	0	0
21ur-13526	0	0	0	1	0	0	0	0	0
21ur-13535	0	4	0	0	0	0	0	0	0
21ur-1354	0	11	0	0	1	17	10	0	0
21ur-13561	0	2	4	0	0	3	0	0	0
21ur-13564	0	0	0	0	1	0	1	0	0
21ur-13565	0	0	0	2	0	5	1	4	1
21ur-13590	0	3	10	0	0	10	5	0	0
21ur-13596	0	0	2	0	0	0	0	0	0
21ur-1360	0	0	0	0	0	0	1	0	1
21ur-13612	0	0	1	0	0	3	0	0	2
21ur-13625	0	0	0	0	0	0	0	3	0
21ur-13626	0	0	0	4	0	0	0	0	0
21ur-13631	0	0	0	0	0	0	0	1	0
21ur-13643	0	0	0	1	0	0	0	0	2
21ur-13665	0	0	0	0	0	2	0	0	0
21ur-13674	0	0	0	2	0	0	0	0	0
21ur-13676	0	0	0	0	2	0	0	0	0
21ur-13678	0	0	0	1	1	1	0	0	0
21ur-13688	0	8	0	13	2	21	5	15	9
21ur-13709	0	0	5	0	0	5	0	2	0
21ur-13714	0	0	0	0	0	7	0	0	0
21ur-13717	0	0	0	0	0	1	0	0	0
21ur-13726	0	0	13	0	0	8	1	0	0
21ur-13736	0	0	0	0	0	0	0	6	0
21ur-1374	0	0	0	0	0	0	0	0	3
21ur-13751	0	0	4	0	0	6	2	0	0
21ur-13778	0	8	0	0	1	0	0	0	0
21ur-13780	0	0	0	1	0	0	0	0	0
21ur-13802	0	2	2	0	0	1	0	2	0
21ur-13804	0	4	2	4	1	0	7	2	6
21ur-13828	0	0	0	0	0	0	0	2	3
21ur-13844	0	0	0	2	0	0	0	0	0
21ur-13854	0	4	1	0	0	3	2	0	0
21ur-13861	0	0	0	0	0	5	0	0	0
21ur-13864	0	1	0	0	0	0	0	0	0
21ur-13866	0	4	0	0	0	0	2	1	2
21ur-13867	0	0	4	0	0	0	0	0	0
21ur-13877	0	6	0	0	0	3	1	22	3
21ur-13885	0	0	0	2	3	0	0	0	0
21ur-13922	0	0	0	0	0	0	0	0	2
21ur-13926	0	0	0	0	0	0	2	0	0
21ur-13934	0	0	0	2	0	0	0	0	0
21ur-13952	81	296	230	330	252	211	84	290	337
21ur-1398	0	0	3	0	0	1	0	0	0
21ur-13994	0	0	3	0	0	0	0	0	0
21ur-14	0	0	0	0	0	4	0	0	0
21ur-14009	0	2	3	0	0	3	0	0	0
21ur-14013	0	0	0	0	0	0	0	1	0
21ur-14029	0	0	7	3	0	0	0	0	0
21ur-14031	18	0	0	0	0	0	0	0	0
21ur-14052	0	0	0	0	0	0	0	1	0
21ur-14060	0	0	0	1	0	1	0	0	0
21ur-14061	0	0	0	0	0	0	0	6	0
21ur-14076	0	0	0	0	0	3	0	0	0
21ur-14078	0	0	0	0	0	0	0	8	0
21ur-14085	0	8	5	1	0	1	6	0	0
21ur-14095	0	0	0	0	0	3	0	0	0
21ur-1410	0	0	1	0	0	0	0	0	0
21ur-14110	23	0	0	0	0	0	0	0	0
21ur-14124	0	0	0	0	0	1	0	0	0
21ur-14136	0	0	4	0	0	0	0	0	0
21ur-14142	0	0	0	0	0	0	0	1	0
21ur-14150	0	0	0	0	0	0	0	3	0
21ur-14159	0	0	0	0	0	0	2	0	0
21ur-14167	0	1	0	0	0	0	0	0	0
21ur-14173	0	0	0	0	0	7	0	0	0
21ur-14175	0	0	0	0	2	0	0	0	0
21ur-14201	0	0	0	4	0	0	0	0	5
21ur-14211	0	0	0	0	0	0	4	0	0
21ur-14231	0	0	0	0	0	4	0	0	0
21ur-14235	0	0	0	0	1	0	0	0	0
21ur-14269	0	0	3	0	0	0	7	0	4
21ur-14295	0	0	0	0	1	0	4	1	0
21ur-1431	0	0	0	0	0	3	0	0	0
21ur-14313	0	0	0	2	0	0	0	0	0
21ur-14318	0	0	0	0	0	0	4	0	0
21ur-14332	0	10	26	7	3	13	3	2	11
21ur-14348	0	0	1	0	3	0	1	0	0
21ur-14349	0	0	1	0	0	2	0	0	0
21ur-14358	0	0	0	0	0	0	0	0	1
21ur-14360	0	0	0	0	0	0	0	4	0
21ur-14376	0	0	0	0	2	1	0	0	0
21ur-14381	0	0	1	0	0	0	0	0	0
21ur-144	0	0	1	0	0	0	0	0	0
21ur-14408	0	0	0	1	0	0	0	0	0
21ur-14412	0	0	0	0	0	1	0	0	0
21ur-14449	91	102	86	31	24	91	46	33	46
21ur-14459	0	0	0	0	0	6	0	0	0
21ur-1446	0	0	2	0	0	0	0	0	0
21ur-14484	0	4	0	0	0	0	0	8	0
21ur-14519	0	3	10	2	1	3	0	0	0
21ur-14542	0	0	0	0	0	0	0	3	0
21ur-14580	0	4	6	1	5	6	1	0	0
21ur-14582	0	2	0	0	0	0	0	0	0
21ur-14585	0	3	4	1	0	2	2	0	0
21ur-14587	0	0	0	0	0	2	0	0	0
21ur-14590	0	4	31	0	0	4	3	0	0
21ur-14622	0	2	0	0	0	0	0	0	0
21ur-14624	0	0	0	12	7	7	0	14	10
21ur-14625	0	0	3	0	0	0	0	0	0
21ur-14629	0	0	2	0	0	0	0	0	0
21ur-14637	0	2	0	0	0	0	1	0	0
21ur-14643	0	0	0	0	0	1	1	1	0
21ur-1465	0	0	0	0	0	0	2	0	0
21ur-1466	0	0	0	0	0	1	0	4	0
21ur-14662	0	0	0	0	0	0	1	0	0
21ur-14671	0	0	0	0	0	0	0	0	2
21ur-14673	0	0	0	3	1	0	0	0	0
21ur-14685	0	0	0	0	1	10	2	6	1
21ur-14686	38	46	16	0	0	50	48	0	0
21ur-14694	0	0	0	0	0	0	0	5	0
21ur-14707	0	0	0	0	1	0	0	0	0
21ur-14708	0	3	1	0	0	0	0	0	0
21ur-14715	0	0	0	0	0	1	0	0	0
21ur-14720	28	0	0	1	0	0	0	0	0
21ur-14724	6	14	8	2	12	4	13	29	22
21ur-14726	0	0	0	0	0	4	0	0	0
21ur-14729	0	0	0	0	0	0	1	0	0
21ur-14736	0	7	1	0	0	0	3	0	0
21ur-14739	0	0	2	0	0	0	0	0	0
21ur-14742	0	0	1	1	0	0	0	0	0
21ur-14743	0	0	0	0	0	0	0	3	0
21ur-14745	15	0	5	7	4	5	0	0	6
21ur-14748	0	0	0	0	0	1	0	0	0
21ur-14760	102	320	214	184	165	291	87	368	388
21ur-14765	0	0	0	2	0	3	0	0	0
21ur-14769	0	1	0	0	0	0	0	0	0
21ur-14772	0	0	0	0	0	2	0	0	0
21ur-14773	0	6	1	2	0	3	0	17	5
21ur-14787	0	0	1	0	0	0	0	0	0
21ur-14788	0	0	0	1	0	0	0	0	0
21ur-14792	0	0	0	0	0	1	0	2	0
21ur-14794	0	0	1	0	0	0	0	0	0
21ur-14797	8	1	2	17	10	6	18	28	25
21ur-14812	0	0	0	0	0	0	0	3	0
21ur-14817	0	0	0	0	0	2	0	0	0
21ur-14820	0	0	0	1	0	0	0	0	0
21ur-14822	0	0	5	0	0	7	0	0	0
21ur-14842	0	0	0	0	1	0	0	0	0
21ur-14852	0	0	0	0	0	2	0	0	0
21ur-14873	0	0	0	1	0	0	0	0	0
21ur-14877	0	0	0	0	0	4	0	0	0
21ur-14881	0	0	0	0	0	0	0	8	0
21ur-14903	0	0	0	0	0	0	5	0	0
21ur-14910	0	0	0	0	3	4	0	0	0
21ur-14914	0	0	0	0	0	1	0	0	0
21ur-14920	0	0	0	2	0	0	9	0	4
21ur-14928	0	5	0	0	0	6	1	0	0
21ur-14940	0	0	0	2	0	0	0	0	0
21ur-14946	0	0	3	0	0	0	0	0	0
21ur-14947	0	0	0	0	1	0	0	0	0
21ur-14951	0	2	2	0	2	9	1	10	11
21ur-14955	0	0	0	0	0	0	0	5	0
21ur-14969	0	0	1	0	0	0	0	0	0
21ur-1497	0	0	3	0	0	0	0	0	0
21ur-14975	0	2	6	0	0	2	2	0	0
21ur-14980	0	1	0	0	0	0	0	0	0
21ur-14981	0	0	1	0	0	0	0	11	5
21ur-14987	0	1	0	0	0	0	0	0	0
21ur-14992	0	0	0	0	0	0	0	1	0
21ur-150	0	0	7	0	0	0	0	0	0
21ur-1500	0	1	0	0	0	0	0	0	0
21ur-15000	0	0	3	0	0	0	0	0	0
21ur-15005	0	0	0	0	0	0	1	0	0
21ur-15006	0	11	5	1	3	25	7	7	2
21ur-15008	0	0	0	0	1	0	0	0	0
21ur-15015	0	0	0	0	0	1	0	0	0
21ur-15020	0	4	1	2	0	0	12	0	0
21ur-15022	0	0	0	0	0	1	1	0	0
21ur-1504	0	0	3	0	0	0	0	0	0
21ur-15046	0	0	0	0	0	0	8	0	0
21ur-15052	0	0	1	0	0	2	0	0	0
21ur-15055	0	1	0	0	2	0	0	3	0
21ur-15056	0	0	0	0	0	1	0	0	0
21ur-15059	0	0	0	0	0	1	0	0	0
21ur-15060	0	0	0	0	1	0	0	0	0
21ur-15068	0	0	2	1	0	2	0	0	0
21ur-15070	0	0	2	2	0	0	0	0	0
21ur-15079	0	0	0	0	0	3	0	0	0
21ur-15084	0	0	0	0	0	0	0	5	0
21ur-15088	0	0	0	0	0	0	0	0	1
21ur-15095	0	4	0	1	0	0	0	0	0
21ur-15099	0	0	0	0	0	3	0	0	0
21ur-15109	0	0	1	0	0	0	0	1	0
21ur-15115	0	0	2	0	4	0	2	0	0
21ur-15146	0	1	3	0	0	0	0	0	0
21ur-15148	0	0	3	0	0	3	0	0	0
21ur-15173	0	0	0	0	0	0	0	4	5
21ur-15174	0	0	0	0	1	0	0	0	0
21ur-15176	0	0	0	0	0	0	0	0	2
21ur-15181	0	0	0	0	0	0	0	3	0
21ur-152	0	0	0	4	0	0	4	15	12
21ur-1521	0	2	0	0	0	0	0	0	0
21ur-15223	0	0	7	0	0	5	0	0	0
21ur-1524	0	0	0	0	0	0	3	0	0
21ur-15244	0	0	2	0	3	0	0	1	0
21ur-15247	0	2	0	0	0	0	0	0	0
21ur-15256	4	0	0	0	0	0	0	0	0
21ur-15261	0	0	0	0	0	5	4	0	0
21ur-15266	0	0	0	0	0	1	0	0	0
21ur-15279	0	0	0	1	0	0	0	0	0
21ur-15284	0	1	0	0	0	0	5	0	0
21ur-15295	0	0	0	1	0	0	0	0	0
21ur-1530	0	0	3	0	0	6	7	0	0
21ur-1531	0	0	0	0	0	0	2	0	0
21ur-15324	0	0	0	0	2	0	0	0	0
21ur-15328	0	0	0	0	0	0	0	1	0
21ur-15343	0	1	0	0	0	2	0	0	0
21ur-15344	0	0	0	0	0	0	5	3	0
21ur-1536	0	0	0	0	0	0	0	0	2
21ur-15369	0	0	0	0	1	0	0	0	0
21ur-15370	0	1	0	0	0	0	0	0	0
21ur-15373	0	0	1	2	0	1	2	0	0
21ur-15375	0	5	0	0	0	0	0	0	0
21ur-15379	0	0	0	0	3	0	0	0	0
21ur-15380	0	0	0	0	0	2	0	0	0
21ur-15402	0	0	3	0	0	2	0	0	0
21ur-15409	0	0	0	3	0	0	0	0	0
21ur-15418	0	0	0	0	0	0	0	1	0
21ur-15445	13	0	0	0	2	0	0	0	0
21ur-15448	0	0	2	0	0	4	0	0	0
21ur-1545	0	6	0	0	0	0	0	0	0
21ur-15462	0	0	0	2	0	0	0	0	0
21ur-15483	0	0	0	1	1	0	0	0	0
21ur-1549	0	3	6	0	0	2	0	0	0
21ur-15491	0	0	0	0	0	8	0	7	19
21ur-15493	0	0	0	0	0	0	0	8	0
21ur-15504	0	11	0	0	3	0	0	0	0
21ur-15514	0	5	2	0	0	3	0	0	0
21ur-15518	0	0	0	0	0	0	0	2	0
21ur-15521	0	0	0	0	0	4	1	0	0
21ur-1553	0	0	1	0	0	2	0	0	0
21ur-15531	0	0	0	0	1	0	0	0	0
21ur-15533	0	0	6	0	0	0	0	0	0
21ur-15539	0	3	0	3	0	0	0	0	0
21ur-15543	0	0	0	0	0	2	0	0	0
21ur-15558	0	0	3	0	0	0	0	0	0
21ur-1556	0	0	0	0	0	1	0	3	0
21ur-1557	0	0	0	0	0	0	0	2	0
21ur-15575	0	1	7	0	0	2	0	0	0
21ur-15588	139	148	178	55	38	205	55	94	57
21ur-15589	0	18	6	9	2	17	7	10	15
21ur-15590	0	0	2	0	0	0	2	0	0
21ur-15630	0	0	7	3	20	10	12	25	30
21ur-15641	0	0	0	0	0	4	0	0	0
21ur-1565	0	0	0	0	0	0	0	1	0
21ur-15659	0	0	0	1	0	0	0	0	0
21ur-15671	0	0	0	0	1	0	0	0	0
21ur-15673	82	301	199	190	185	476	225	233	295
21ur-15680	3	0	0	2	0	0	6	11	0
21ur-15690	0	4	0	0	0	0	0	0	0
21ur-15696	0	0	0	0	0	2	0	0	0
21ur-15699	0	0	0	0	0	0	4	0	0
21ur-15701	0	0	0	0	0	1	0	0	0
21ur-1572	0	0	0	0	0	0	0	5	4
21ur-1574	0	0	0	1	0	0	1	0	0
21ur-1580	0	0	1	0	0	0	2	1	0
21ur-1588	0	1	0	0	0	0	2	0	0
21ur-1589	0	0	5	0	0	0	0	0	0
21ur-1600	0	0	0	0	0	2	0	0	0
21ur-1604	0	0	1	0	0	0	0	0	0
21ur-1614	0	0	0	0	0	0	0	3	0
21ur-1618	0	0	0	0	2	0	0	0	0
21ur-1631	0	4	1	0	2	31	0	0	0
21ur-1636	0	0	0	0	0	0	0	0	1
21ur-1665	0	0	0	0	0	3	6	0	0
21ur-1667	0	0	0	2	0	0	5	0	0
21ur-167	0	0	0	0	0	2	0	0	0
21ur-1670	0	0	0	0	0	0	1	2	4
21ur-1675	0	0	0	0	1	0	0	0	0
21ur-1694	0	0	0	0	1	0	0	0	0
21ur-1700	0	1	0	0	0	0	0	0	0
21ur-1707	0	0	0	0	0	2	0	0	0
21ur-1710	0	0	0	0	0	4	0	0	0
21ur-1728	0	0	0	2	0	0	0	0	0
21ur-1729	0	0	0	2	0	0	3	0	0
21ur-173	0	5	1	0	0	0	0	0	0
21ur-1733	0	0	0	0	0	0	0	2	0
21ur-1738	0	13	0	0	0	0	0	0	0
21ur-1740	0	0	0	0	0	3	0	0	0
21ur-1743	0	0	0	0	0	2	0	0	0
21ur-1749	0	0	3	0	0	4	0	0	0
21ur-1751	0	0	0	0	1	0	0	0	0
21ur-1760	0	0	0	3	0	0	0	0	0
21ur-1779	0	0	0	0	0	0	4	0	0
21ur-1785	0	2	0	0	0	0	1	0	0
21ur-1796	0	1	0	0	1	0	0	5	3
21ur-1799	0	0	0	0	0	0	0	5	0
21ur-1815	0	6	0	0	4	0	1	0	0
21ur-1818	0	4	1	3	0	2	0	0	0
21ur-1829	0	0	2	0	0	1	0	0	0
21ur-1835	0	0	0	0	0	0	0	2	0
21ur-1837	0	0	0	0	0	0	1	0	0
21ur-1840	0	0	0	0	0	0	9	0	0
21ur-1850	0	0	0	0	0	0	0	0	6
21ur-1868	8	0	0	0	0	0	0	0	0
21ur-1885	0	0	0	0	0	0	1	0	0
21ur-1892	0	0	0	0	0	0	3	0	0
21ur-1897	0	0	1	0	0	0	0	0	0
21ur-1903	0	0	0	0	0	0	0	3	0
21ur-1906	0	2	0	0	0	0	0	0	0
21ur-1963	0	0	0	0	0	4	0	0	0
21ur-1979	0	0	3	0	0	0	0	0	0
21ur-198	0	0	0	0	0	0	0	2	0
21ur-1980	0	1	0	0	0	0	0	0	0
21ur-1982	0	0	0	0	0	0	4	0	0
21ur-1993	0	0	0	0	3	0	0	0	0
21ur-1999	0	0	0	0	0	0	0	5	0
21ur-2012	0	0	0	0	0	0	0	0	3
21ur-2013	0	0	0	0	0	0	1	0	0
21ur-2017	0	0	0	0	0	2	0	0	0
21ur-2021	0	0	0	0	0	0	0	3	0
21ur-2022	0	0	0	0	0	1	0	0	0
21ur-2041	0	0	0	2	0	4	0	0	2
21ur-2051	6	0	1	0	0	0	2	0	0
21ur-2072	0	0	0	0	0	0	4	0	0
21ur-2087	0	4	0	0	0	3	0	0	0
21ur-2098	0	4	0	0	0	0	0	0	0
21ur-2099	0	0	2	0	0	0	0	3	0
21ur-2115	0	0	3	0	0	1	0	0	0
21ur-2118	0	0	0	0	0	0	0	0	4
21ur-2121	0	0	6	0	0	0	0	0	0
21ur-2124	0	2	0	0	0	0	0	0	0
21ur-2135	0	0	0	0	0	0	0	4	0
21ur-214	0	0	0	0	0	0	1	0	0
21ur-2142	0	0	0	0	0	1	0	0	0
21ur-2151	0	0	0	0	0	0	0	2	0
21ur-2167	0	0	1	0	0	0	3	0	0
21ur-2172	0	0	0	0	0	5	0	0	0
21ur-2189	0	0	0	0	0	0	0	4	0
21ur-2191	0	6	2	0	0	2	0	0	0
21ur-2196	7	0	0	0	0	4	0	0	0
21ur-2200	0	3	0	0	0	0	0	0	0
21ur-2206	0	2	0	0	0	0	1	0	2
21ur-222	0	0	1	1	0	0	0	0	0
21ur-2226	0	0	0	1	0	0	0	1	0
21ur-2228	0	0	1	0	0	0	0	0	0
21ur-2251	0	0	0	0	1	0	0	0	0
21ur-2256	0	0	0	0	1	0	0	0	0
21ur-2258	0	0	2	0	0	0	0	0	0
21ur-2260	0	0	0	0	0	6	3	0	0
21ur-2271	0	0	0	0	0	0	4	0	0
21ur-2298	0	0	1	2	0	0	0	0	1
21ur-2302	0	0	0	0	0	1	0	0	0
21ur-2309	0	0	0	0	1	0	0	0	0
21ur-2317	13	1	0	0	0	0	0	0	0
21ur-2327	0	0	0	0	0	2	0	1	0
21ur-2348	0	0	0	0	0	0	0	3	0
21ur-2356	0	2	0	0	0	0	0	0	0
21ur-2366	0	0	0	0	0	6	0	0	0
21ur-2369	0	0	0	0	0	1	0	0	0
21ur-2380	0	0	0	0	0	13	1	0	0
21ur-2397	0	13	6	0	2	4	5	0	0
21ur-2402	0	8	0	0	0	3	5	0	0
21ur-2403	0	1	0	0	0	4	0	0	0
21ur-2427	0	0	3	0	0	0	0	0	0
21ur-2429	0	0	0	4	2	0	0	0	7
21ur-2436	0	0	0	1	0	5	5	0	0
21ur-2443	0	0	0	0	0	0	7	0	0
21ur-2460	0	0	3	0	0	5	0	0	0
21ur-2470	0	0	0	0	0	2	0	0	0
21ur-2478	0	0	0	0	0	4	0	0	0
21ur-249	0	0	0	0	0	0	0	2	0
21ur-2491	0	0	0	0	0	0	0	1	0
21ur-2500	0	0	0	0	0	1	0	0	0
21ur-2501	0	3	2	0	0	2	0	0	0
21ur-2502	0	6	0	0	0	0	0	0	0
21ur-251	0	0	0	0	0	0	3	0	0
21ur-2513	0	0	0	0	0	0	0	2	0
21ur-252	0	0	0	0	1	0	0	12	3
21ur-2549	0	0	0	0	0	3	2	0	1
21ur-255	0	0	6	0	0	2	0	0	0
21ur-2555	0	0	0	2	0	0	0	0	0
21ur-2592	0	5	6	0	0	0	10	0	0
21ur-2597	0	0	0	0	0	0	1	0	0
21ur-2599	0	0	0	1	0	0	0	0	0
21ur-2604	0	0	0	4	10	0	0	7	4
21ur-2615	0	0	0	0	0	0	0	1	0
21ur-2621	0	0	0	0	1	0	0	0	0
21ur-2638	0	0	0	5	0	0	0	0	0
21ur-264	0	0	0	0	0	1	0	0	0
21ur-2640	0	0	0	0	0	3	0	0	0
21ur-2641	0	0	0	1	0	0	0	3	0
21ur-2651	9	0	0	0	0	0	0	0	0
21ur-2655	0	0	0	0	2	0	0	0	0
21ur-2661	0	0	0	0	0	0	0	3	0
21ur-2667	0	0	0	0	0	3	1	8	0
21ur-2670	0	0	0	0	0	0	0	2	6
21ur-2671	0	0	0	0	0	12	0	0	0
21ur-2694	0	0	0	0	0	4	0	0	0
21ur-2698	0	1	0	0	0	0	0	0	0
21ur-2705	0	5	0	0	0	0	0	0	0
21ur-2711	0	0	0	2	1	0	0	0	0
21ur-2715	0	0	0	0	0	0	1	0	0
21ur-2753	0	0	7	3	0	0	0	0	0
21ur-2755	0	0	0	0	0	0	0	5	0
21ur-2757	0	0	0	0	0	1	0	0	0
21ur-2765	16	0	0	0	0	0	0	0	0
21ur-2780	0	4	0	0	0	0	0	0	0
21ur-2789	0	0	0	0	0	0	3	0	0
21ur-2794	0	0	0	0	0	0	4	2	6
21ur-2799	0	0	0	0	0	0	0	0	3
21ur-2802	0	6	2	0	1	4	0	0	2
21ur-2806	0	0	0	0	0	1	4	0	0
21ur-2811	0	0	0	0	0	0	0	1	0
21ur-2814	0	0	2	0	0	0	0	0	0
21ur-2816	19	0	0	0	0	0	0	0	0
21ur-2824	0	0	0	0	0	0	0	2	0
21ur-2830	0	0	0	2	0	0	0	0	0
21ur-2836	0	0	1	0	3	2	0	0	0
21ur-2841	0	3	0	1	0	0	0	0	0
21ur-2851	5	5	6	0	0	0	0	0	0
21ur-2855	0	0	0	6	0	0	0	0	0
21ur-2869	0	0	0	0	0	1	0	0	0
21ur-2877	0	0	0	0	0	5	0	0	0
21ur-2878	0	0	0	0	6	0	0	0	0
21ur-2886	0	0	3	0	0	0	0	0	0
21ur-2900	0	0	3	0	0	11	0	0	0
21ur-2907	0	0	0	0	0	4	1	0	0
21ur-2935	0	8	0	0	0	10	3	0	0
21ur-2943	0	0	0	0	0	4	0	0	0
21ur-2964	0	0	0	5	0	0	0	0	0
21ur-2968	0	0	0	0	0	0	0	2	0
21ur-2981	0	0	0	0	0	0	0	4	0
21ur-2983	0	0	0	0	0	0	2	0	0
21ur-2987	0	0	0	1	0	0	0	1	0
21ur-2995	0	0	0	0	0	0	0	3	0
21ur-2997	0	0	0	0	0	2	0	0	0
21ur-3006	0	0	0	0	1	0	0	0	0
21ur-3008	0	0	0	0	0	0	0	15	0
21ur-3021	0	0	0	0	0	1	0	0	0
21ur-3025	0	0	14	0	0	9	1	0	0
21ur-3027	0	0	2	0	0	0	0	0	0
21ur-3052	15	0	0	7	5	8	0	0	0
21ur-3060	0	0	0	0	0	0	0	2	0
21ur-307	0	0	0	0	0	3	0	2	0
21ur-3076	0	0	0	0	0	4	0	0	0
21ur-3077	0	0	0	1	0	0	17	14	1
21ur-3080	0	0	0	0	0	0	0	1	1
21ur-3093	0	0	0	0	1	0	0	0	0
21ur-3094	14	1	0	0	0	0	4	8	1
21ur-310	0	0	0	0	0	2	0	0	0
21ur-3111	0	0	1	0	0	1	0	0	0
21ur-3117	0	4	0	0	0	0	0	0	0
21ur-3123	0	0	0	0	2	0	0	0	0
21ur-3160	0	0	1	1	0	0	0	0	7
21ur-3162	0	0	0	0	0	0	0	3	0
21ur-3165	0	2	0	2	2	10	5	17	7
21ur-317	0	0	0	3	0	1	0	0	0
21ur-3177	0	0	0	2	0	0	0	0	0
21ur-3184	0	0	0	0	0	0	0	1	0
21ur-3185	0	0	0	0	0	7	0	0	0
21ur-3188	0	0	0	0	0	1	0	0	0
21ur-3203	0	0	0	0	0	0	0	0	2
21ur-3211	0	0	0	0	0	2	0	0	0
21ur-3214	0	0	2	0	0	0	0	0	0
21ur-3234	0	4	0	0	0	0	0	0	0
21ur-3243	35	0	0	0	0	0	0	0	0
21ur-3254	0	1	1	0	0	5	0	0	0
21ur-3255	0	9	0	0	0	0	2	0	0
21ur-3256	0	0	0	1	0	0	0	0	0
21ur-3266	0	0	0	0	0	4	0	0	0
21ur-3273	0	0	0	0	0	0	2	0	0
21ur-3280	0	0	1	0	0	0	0	0	0
21ur-3285	0	0	2	0	0	0	0	0	0
21ur-3293	0	0	0	0	0	4	0	0	0
21ur-3304	0	0	1	0	0	0	0	0	0
21ur-3314	0	0	2	0	0	0	0	0	0
21ur-3318	0	0	1	0	0	0	0	0	0
21ur-332	0	0	0	0	0	0	4	0	0
21ur-333	0	0	0	0	1	0	0	0	0
21ur-3350	0	0	0	0	0	2	0	0	0
21ur-3351	0	2	0	0	1	0	0	0	0
21ur-3382	0	0	1	1	0	0	0	4	0
21ur-3386	0	5	0	0	0	2	0	0	0
21ur-3387	0	2	13	2	7	17	4	0	0
21ur-3419	0	1	0	0	0	0	0	0	0
21ur-3421	0	4	6	0	2	0	0	0	0
21ur-343	0	0	0	0	0	3	0	0	4
21ur-3443	0	3	8	0	0	3	2	2	0
21ur-3457	0	0	2	0	0	0	0	0	0
21ur-3462	0	6	0	0	0	2	0	0	0
21ur-3468	0	0	0	2	2	5	5	10	0
21ur-3474	0	0	0	5	0	0	0	0	0
21ur-3493	0	3	0	0	0	0	0	0	0
21ur-3496	0	0	2	0	0	0	0	0	0
21ur-3497	0	0	0	0	0	1	1	0	0
21ur-3500	0	0	0	0	0	0	0	0	2
21ur-3504	45	7	5	1	3	23	12	0	9
21ur-3506	0	0	0	0	4	0	0	0	0
21ur-3513	0	0	0	4	0	0	0	0	0
21ur-3530	0	0	0	0	0	0	1	3	0
21ur-3531	0	0	0	2	0	0	0	0	0
21ur-354	0	0	0	0	1	0	0	0	0
21ur-3545	0	1	0	0	0	0	0	0	0
21ur-3546	0	0	0	4	0	0	0	0	0
21ur-3556	0	0	3	0	0	0	1	0	0
21ur-3564	0	0	2	0	0	0	0	0	0
21ur-3569	0	0	0	0	0	0	1	0	0
21ur-3589	0	0	1	0	0	0	0	0	0
21ur-3591	0	0	0	0	0	7	0	0	0
21ur-3602	0	0	0	0	0	2	0	0	0
21ur-3612	0	0	0	0	0	0	0	3	0
21ur-362	0	0	0	0	0	0	0	0	4
21ur-3635	0	0	0	0	0	0	0	3	0
21ur-3636	0	0	0	0	0	0	0	3	0
21ur-3637	0	0	0	0	0	5	0	0	0
21ur-364	0	2	0	0	0	0	0	0	0
21ur-3641	0	0	0	0	0	0	0	3	0
21ur-3649	0	0	0	0	5	0	0	0	0
21ur-3655	0	0	0	0	0	0	0	1	0
21ur-3668	0	0	0	0	0	0	0	0	2
21ur-3677	0	1	5	0	7	0	0	0	0
21ur-3682	0	0	0	0	0	0	0	10	0
21ur-3688	0	0	0	1	0	0	0	0	5
21ur-3691	0	0	0	0	2	0	0	0	0
21ur-3697	0	0	0	0	0	1	0	0	0
21ur-3716	0	0	0	0	1	0	3	0	2
21ur-3724	0	0	0	0	0	0	0	3	0
21ur-3727	0	0	0	0	3	0	0	0	0
21ur-3730	0	0	0	0	0	6	0	0	0
21ur-3731	14	9	7	66	13	4	6	19	10
21ur-3738	0	0	0	0	0	0	6	0	0
21ur-3747	0	0	0	0	0	2	0	0	0
21ur-3752	0	3	0	0	0	0	9	0	0
21ur-3755	0	0	0	0	0	0	1	0	0
21ur-3758	0	0	0	0	0	0	1	0	0
21ur-3760	0	0	1	0	0	0	0	0	0
21ur-3772	0	0	0	2	0	0	0	0	0
21ur-3774	0	0	0	0	2	0	0	2	0
21ur-3796	0	0	0	0	0	3	0	0	0
21ur-3801	0	0	0	0	0	1	0	0	0
21ur-3813	0	3	0	0	0	0	0	0	0
21ur-3835	0	0	0	0	0	0	0	2	0
21ur-3844	0	0	0	0	0	0	0	1	0
21ur-3847	0	0	0	2	0	0	0	0	0
21ur-3849	15	0	0	0	0	0	0	0	0
21ur-3864	0	0	0	0	0	0	0	2	0
21ur-3865	0	1	0	0	3	0	0	0	0
21ur-3874	0	5	0	0	0	0	0	0	0
21ur-3880	0	6	3	0	0	0	0	0	0
21ur-3888	0	0	0	0	0	7	0	0	0
21ur-3890	0	0	0	0	0	2	0	0	0
21ur-39	0	0	1	0	0	0	0	0	0
21ur-390	0	0	0	0	0	1	0	0	0
21ur-3908	0	2	0	0	0	0	0	0	0
21ur-3937	0	0	0	0	0	0	4	2	0
21ur-3939	0	0	0	0	0	0	0	3	0
21ur-3940	0	0	0	0	0	0	6	0	0
21ur-395	0	0	0	0	2	3	0	0	0
21ur-3955	0	0	0	0	0	0	1	0	0
21ur-3958	0	0	0	0	1	0	0	1	0
21ur-3966	0	0	0	0	0	3	1	0	0
21ur-3971	0	6	0	1	0	0	0	0	0
21ur-3972	0	0	0	0	0	2	0	0	0
21ur-3976	0	0	0	0	0	1	3	0	0
21ur-3984	0	0	0	0	0	2	0	0	0
21ur-3987	0	0	0	2	1	0	0	0	0
21ur-399	0	0	0	0	0	9	0	7	10
21ur-3991	0	0	2	0	0	2	0	0	0
21ur-3995	0	6	1	3	1	1	0	9	2
21ur-400	0	0	0	0	0	0	0	1	0
21ur-401	0	6	23	0	1	2	0	0	0
21ur-4011	0	0	0	0	0	0	0	5	9
21ur-4015	0	0	0	0	0	0	0	1	0
21ur-4035	0	0	0	0	0	1	0	0	0
21ur-4040	0	0	2	0	0	0	0	0	0
21ur-4042	0	0	0	0	0	2	0	0	0
21ur-4044	0	0	0	4	4	0	0	0	2
21ur-4058	0	0	0	0	0	5	0	0	0
21ur-406	0	0	3	1	0	0	0	0	0
21ur-4068	0	0	0	0	0	0	2	0	0
21ur-4070	0	0	0	0	0	2	0	0	0
21ur-4076	0	0	0	0	0	5	0	0	0
21ur-4078	0	0	0	0	3	0	0	0	0
21ur-409	0	0	0	1	0	0	0	0	0
21ur-4127	0	0	0	0	0	0	2	0	0
21ur-4139	0	0	3	2	2	6	10	0	0
21ur-4146	0	0	0	3	0	0	3	0	0
21ur-4179	0	0	0	2	0	0	0	0	0
21ur-4191	0	0	0	1	0	0	0	0	0
21ur-420	0	0	2	7	1	0	0	2	0
21ur-4213	0	0	7	0	0	2	0	0	0
21ur-4216	0	0	0	0	0	0	2	0	0
21ur-4225	0	0	0	2	0	0	0	0	0
21ur-4227	0	0	0	0	0	0	4	8	0
21ur-4239	0	1	0	0	0	0	0	0	0
21ur-4241	0	0	0	0	0	1	0	0	0
21ur-4253	0	0	0	0	0	0	3	0	0
21ur-4259	0	0	0	0	0	0	0	3	0
21ur-4261	0	0	0	0	0	0	2	0	0
21ur-4280	0	0	0	3	0	0	0	0	0
21ur-4289	0	0	0	0	0	0	3	0	5
21ur-4291	0	0	16	6	4	26	13	6	19
21ur-4298	0	1	0	0	0	0	0	0	0
21ur-4304	0	0	0	1	0	0	3	2	0
21ur-4317	0	3	2	0	1	1	0	0	0
21ur-432	0	0	0	0	0	2	0	20	30
21ur-4321	0	0	0	2	0	0	0	0	2
21ur-4334	0	0	0	0	0	1	0	0	0
21ur-4335	0	0	0	0	0	0	0	4	0
21ur-436	0	0	0	1	0	0	0	0	0
21ur-4364	0	0	0	0	0	2	0	2	0
21ur-4389	0	0	0	0	0	0	0	0	1
21ur-439	0	0	0	0	1	0	0	0	0
21ur-4393	0	0	0	0	0	0	0	1	0
21ur-4398	0	0	0	0	0	0	1	0	0
21ur-4409	0	0	0	0	0	8	0	2	0
21ur-4412	0	0	0	0	0	8	0	0	0
21ur-4415	0	0	0	0	0	2	0	0	0
21ur-4429	0	0	0	0	0	0	0	1	0
21ur-4432	0	0	0	0	0	2	0	7	3
21ur-4445	0	0	0	0	0	4	0	0	0
21ur-4447	0	0	0	0	0	0	0	6	0
21ur-4453	0	0	0	0	0	0	0	6	0
21ur-4454	0	0	0	0	0	0	0	2	0
21ur-4463	0	0	0	6	0	1	2	0	0
21ur-4480	0	0	0	0	0	0	0	2	0
21ur-4485	0	0	0	1	0	0	0	0	0
21ur-4490	8	0	0	0	0	0	0	0	1
21ur-4492	0	0	0	0	0	1	0	0	0
21ur-4497	0	5	0	0	0	3	0	0	0
21ur-45	0	0	0	6	0	9	0	0	0
21ur-4503	0	0	0	0	0	0	0	2	0
21ur-4504	0	0	0	0	0	0	0	3	0
21ur-4505	0	7	0	0	0	11	0	0	0
21ur-4509	0	0	0	0	0	0	0	2	0
21ur-451	0	0	0	0	1	0	5	0	0
21ur-4510	0	0	0	0	0	0	0	0	1
21ur-4514	0	0	0	0	0	0	1	0	0
21ur-4516	0	0	2	0	0	0	0	0	0
21ur-4518	0	0	0	0	0	1	0	0	0
21ur-4544	0	0	0	0	0	0	0	5	0
21ur-4549	0	0	0	1	0	0	0	0	0
21ur-4552	0	0	0	0	1	0	0	0	0
21ur-4553	0	0	0	0	1	0	0	0	0
21ur-4557	0	0	0	0	0	0	1	0	2
21ur-4563	0	2	0	0	0	0	0	0	0
21ur-4626	0	0	0	0	0	3	0	0	0
21ur-4640	0	0	0	0	0	1	0	0	0
21ur-4648	0	0	0	0	0	0	1	0	0
21ur-4660	0	5	0	0	0	0	0	0	0
21ur-4662	0	2	0	0	0	0	0	0	0
21ur-4679	0	0	0	3	0	0	0	0	0
21ur-468	0	0	0	0	0	0	1	0	0
21ur-4691	0	0	0	0	0	8	0	0	0
21ur-4706	0	8	0	4	0	0	0	0	0
21ur-4707	0	0	0	0	0	0	1	0	0
21ur-471	0	0	0	2	0	0	0	0	0
21ur-4713	0	0	0	0	0	2	0	0	0
21ur-4720	0	0	8	0	0	0	0	0	0
21ur-4736	0	0	0	0	0	2	7	0	0
21ur-4737	0	0	0	0	0	1	0	0	0
21ur-4739	0	0	0	1	1	0	0	0	1
21ur-474	0	0	0	0	0	0	0	0	2
21ur-4770	0	0	0	0	1	0	0	0	0
21ur-4778	0	0	0	2	0	1	0	0	0
21ur-4784	0	0	1	0	0	0	0	2	6
21ur-4795	0	3	0	0	0	0	0	0	0
21ur-4798	0	0	0	0	0	0	2	0	0
21ur-48	0	0	2	0	0	0	0	0	0
21ur-480	0	0	0	0	0	2	1	0	0
21ur-4800	0	0	0	0	0	5	3	0	0
21ur-4824	0	1	0	1	0	0	0	0	0
21ur-4829	0	0	0	0	0	5	0	0	0
21ur-4831	0	0	0	0	0	0	1	0	0
21ur-4841	0	0	0	1	0	0	0	5	4
21ur-4843	0	0	0	0	0	1	0	0	0
21ur-4844	0	0	2	0	0	0	0	0	0
21ur-4845	0	0	0	0	0	3	0	3	0
21ur-4846	0	0	0	0	0	5	0	0	0
21ur-4850	0	0	0	0	0	1	0	0	0
21ur-4852	0	0	0	0	0	0	1	0	0
21ur-4871	0	0	0	0	0	2	0	0	0
21ur-4889	0	2	5	3	2	10	5	0	0
21ur-4897	0	2	0	0	0	0	0	2	0
21ur-4920	0	3	0	0	0	0	0	0	0
21ur-4927	0	0	0	0	0	3	0	0	0
21ur-4928	0	2	0	0	0	0	0	0	0
21ur-4944	0	0	0	0	0	0	1	0	0
21ur-4963	0	0	0	2	0	2	0	0	0
21ur-4973	0	13	3	0	0	2	2	0	0
21ur-4976	0	0	0	0	0	0	0	6	0
21ur-5002	0	0	0	0	0	3	6	0	0
21ur-5003	0	0	0	0	0	4	0	0	0
21ur-5016	0	0	0	0	0	0	2	0	0
21ur-502	0	0	0	0	0	0	0	2	0
21ur-5020	0	0	0	0	0	2	0	0	0
21ur-5027	0	4	14	0	9	12	6	0	0
21ur-5034	0	0	0	0	0	0	0	3	0
21ur-5037	0	0	0	0	0	0	0	0	1
21ur-5049	0	1	0	0	0	0	0	0	0
21ur-5062	0	0	0	0	0	0	0	0	3
21ur-5077	0	0	0	0	0	0	1	0	0
21ur-5084	0	0	0	0	2	0	0	0	0
21ur-5085	0	0	0	3	0	0	0	0	5
21ur-509	5	0	2	0	0	0	0	0	0
21ur-5090	0	0	0	0	1	0	0	0	0
21ur-5140	5	0	0	0	0	0	0	0	0
21ur-5143	0	0	0	0	0	0	0	2	0
21ur-5144	0	4	0	0	0	7	0	0	0
21ur-5159	0	0	0	4	0	0	0	0	0
21ur-5163	0	0	0	0	3	0	1	0	0
21ur-517	0	0	0	1	0	0	0	0	0
21ur-5171	0	0	0	0	0	1	0	0	6
21ur-5175	0	9	5	0	0	7	5	0	0
21ur-5184	0	0	2	0	0	0	0	0	0
21ur-5209	0	0	0	0	2	0	0	0	0
21ur-5210	0	1	0	0	0	0	0	0	0
21ur-5224	0	0	12	0	0	0	0	0	0
21ur-5229	0	0	0	0	0	0	0	2	0
21ur-5230	0	0	3	0	0	0	0	0	0
21ur-5231	0	0	0	0	2	0	1	0	0
21ur-5233	20	0	0	0	0	0	0	0	0
21ur-5238	0	1	0	8	0	21	2	23	12
21ur-5243	0	0	0	1	0	0	0	0	0
21ur-525	0	0	0	0	0	8	0	0	0
21ur-5250	0	6	4	0	0	1	0	0	0
21ur-5253	0	0	0	3	0	0	0	0	0
21ur-5254	0	6	0	0	0	0	0	0	0
21ur-5261	0	2	0	0	0	0	0	0	0
21ur-528	0	0	0	0	0	0	4	0	0
21ur-5283	0	0	0	2	0	0	0	0	0
21ur-5284	0	0	0	0	0	0	4	0	0
21ur-5285	0	0	1	0	0	1	0	0	0
21ur-5290	0	0	0	0	0	2	0	0	0
21ur-5294	0	0	0	0	0	0	0	1	0
21ur-5295	0	0	0	0	0	6	0	0	0
21ur-53	0	0	0	1	0	0	0	0	0
21ur-5306	0	0	0	0	0	5	0	0	0
21ur-5307	0	0	0	0	0	4	0	0	0
21ur-5308	0	0	0	0	0	0	7	0	0
21ur-5311	0	0	1	0	0	0	0	0	0
21ur-5312	0	0	0	0	0	1	0	0	0
21ur-5327	0	2	0	0	0	3	4	0	0
21ur-5338	0	0	0	0	0	0	1	0	0
21ur-5342	0	0	0	1	0	0	0	0	0
21ur-5343	0	0	0	2	0	1	0	8	2
21ur-5354	0	0	0	0	0	2	0	0	0
21ur-5355	0	0	0	0	0	0	1	0	0
21ur-5359	0	0	0	0	0	0	0	3	0
21ur-5362	0	0	0	0	0	0	0	1	0
21ur-5368	0	0	1	0	0	0	0	0	0
21ur-5385	0	0	0	0	0	1	0	0	0
21ur-5399	0	0	0	0	2	0	0	2	2
21ur-5402	0	0	0	0	0	1	0	0	0
21ur-5405	0	0	1	0	0	0	0	0	0
21ur-541	0	1	0	0	0	0	0	0	0
21ur-5419	0	0	0	0	0	0	0	3	0
21ur-5430	0	0	0	0	0	1	0	0	0
21ur-5438	0	0	0	0	0	0	3	0	0
21ur-5446	0	0	0	4	0	8	0	0	0
21ur-5448	0	0	0	0	0	1	0	0	0
21ur-5471	0	0	0	0	0	2	0	0	0
21ur-5481	0	3	0	0	0	0	0	0	0
21ur-551	0	0	0	0	4	0	0	0	0
21ur-5555	0	0	0	0	0	0	0	2	0
21ur-5557	0	0	0	0	0	0	0	0	4
21ur-5559	0	0	0	0	0	7	0	0	0
21ur-5575	0	0	0	0	0	0	1	0	0
21ur-5583	0	0	0	0	0	0	1	1	0
21ur-5591	0	0	0	0	3	0	0	0	0
21ur-5613	6	8	1	47	19	7	0	17	43
21ur-5631	0	11	0	0	0	0	0	0	0
21ur-5640	0	0	0	0	0	0	2	0	0
21ur-5641	0	0	0	0	0	3	0	0	0
21ur-5659	0	0	0	0	2	0	0	0	0
21ur-5664	0	4	0	0	0	0	0	0	0
21ur-569	0	0	0	0	1	0	0	0	0
21ur-5716	0	0	0	0	0	0	1	0	0
21ur-5717	0	0	0	0	4	0	0	5	9
21ur-5759	0	0	0	0	0	0	0	5	0
21ur-5787	0	0	0	0	0	0	4	0	0
21ur-5800	0	0	0	0	0	0	1	0	5
21ur-5808	0	0	0	0	0	6	6	0	2
21ur-5823	0	0	0	0	0	1	0	0	0
21ur-5856	0	0	0	0	1	0	0	0	0
21ur-5865	0	0	0	0	0	1	0	0	0
21ur-5883	0	0	0	0	1	0	0	0	0
21ur-5896	1	0	1	0	0	9	0	0	0
21ur-5908	20	4	6	0	0	1	4	0	0
21ur-5914	0	0	0	0	0	0	0	1	0
21ur-5920	0	0	0	0	0	0	0	4	0
21ur-5921	0	0	0	0	0	0	0	9	0
21ur-5925	0	0	0	0	0	0	0	0	1
21ur-5926	0	4	0	0	0	0	0	0	0
21ur-5929	0	0	0	0	0	3	0	0	0
21ur-5941	0	0	3	0	0	7	4	0	0
21ur-5951	0	0	0	0	0	0	4	0	0
21ur-5956	0	2	1	0	0	0	0	0	0
21ur-5961	0	0	0	0	0	0	1	0	0
21ur-5967	0	0	0	3	0	0	0	7	0
21ur-5970	0	0	0	1	0	0	0	0	0
21ur-5982	0	0	0	0	4	0	0	0	0
21ur-5984	0	0	0	0	0	0	3	0	0
21ur-5997	0	0	0	0	0	0	0	0	4
21ur-5999	0	0	0	0	0	5	0	0	0
21ur-6015	0	0	0	0	4	0	0	1	0
21ur-6040	0	0	0	2	0	0	0	0	0
21ur-6042	0	0	0	2	0	0	0	0	0
21ur-6051	0	0	3	0	0	0	0	0	0
21ur-6052	0	0	1	0	0	0	0	0	0
21ur-6053	0	0	5	0	0	0	0	0	0
21ur-6059	0	2	3	0	0	2	0	0	0
21ur-6076	0	1	0	0	0	0	0	0	0
21ur-6080	0	0	0	0	0	2	0	0	0
21ur-61	0	0	0	0	0	1	0	0	0
21ur-6118	0	0	0	0	0	4	0	0	0
21ur-6138	0	0	0	0	0	0	2	0	0
21ur-6144	0	0	0	0	0	2	0	0	0
21ur-6158	0	0	0	0	0	0	5	0	0
21ur-6178	0	9	0	0	0	0	1	3	2
21ur-6193	0	0	2	0	0	0	0	0	0
21ur-6198	0	11	7	0	0	10	7	2	0
21ur-6215	0	0	0	0	0	0	1	0	0
21ur-6217	0	0	0	0	1	0	0	0	0
21ur-6221	12	0	0	0	0	0	0	0	0
21ur-6233	0	0	0	0	0	1	0	0	0
21ur-6236	0	4	0	0	0	0	0	0	0
21ur-6237	0	0	0	5	0	0	0	0	0
21ur-6242	0	4	0	0	0	0	0	0	0
21ur-6258	0	0	0	0	0	0	1	0	0
21ur-6270	0	0	0	0	3	0	0	0	0
21ur-6285	0	0	0	0	0	2	0	0	0
21ur-6302	0	0	1	0	0	0	0	0	0
21ur-6310	0	0	0	0	0	0	1	0	0
21ur-6338	0	0	0	0	0	0	5	2	0
21ur-6344	0	0	0	0	0	3	0	0	0
21ur-6349	0	0	0	0	0	0	2	0	0
21ur-6354	0	0	0	0	0	3	0	0	0
21ur-6355	0	0	0	0	0	0	0	1	0
21ur-6358	0	0	0	0	0	1	0	0	0
21ur-6372	0	0	0	0	0	0	0	1	2
21ur-6396	0	0	0	0	0	0	5	0	0
21ur-640	0	9	4	0	0	0	2	1	6
21ur-6407	0	0	0	1	0	0	0	0	0
21ur-6420	0	0	5	0	0	0	0	0	0
21ur-6424	0	0	0	0	4	0	0	0	0
21ur-6425	0	0	0	0	0	0	12	0	0
21ur-6426	0	2	1	0	0	0	0	0	5
21ur-6428	11	0	0	0	0	0	0	0	0
21ur-6436	0	0	0	0	0	2	0	0	0
21ur-6449	0	0	0	5	0	0	0	0	0
21ur-645	0	1	5	0	0	0	0	0	0
21ur-6456	0	0	0	0	0	0	0	1	0
21ur-6461	0	0	0	5	0	0	1	5	0
21ur-6478	0	0	0	0	0	0	1	1	8
21ur-6482	0	0	0	0	0	2	0	0	0
21ur-6488	0	0	0	0	0	0	0	8	0
21ur-6494	0	0	0	0	0	1	0	0	0
21ur-6496	0	0	1	4	1	6	0	0	0
21ur-6499	14	0	2	0	2	0	0	0	0
21ur-6500	0	0	0	0	0	1	0	0	0
21ur-6515	0	0	1	12	3	4	3	32	8
21ur-6527	0	0	0	0	0	2	0	0	0
21ur-6532	0	0	0	0	0	2	0	0	0
21ur-6555	0	0	0	0	0	0	3	0	0
21ur-6556	0	4	0	0	0	0	6	0	0
21ur-6577	0	0	2	0	0	0	0	0	0
21ur-6598	14	3	2	3	7	3	2	0	2
21ur-6599	0	0	4	0	0	0	5	0	0
21ur-6600	0	0	0	0	0	0	0	3	0
21ur-6607	0	0	1	0	0	0	0	0	0
21ur-6610	0	1	6	0	0	0	0	0	0
21ur-6617	0	0	0	0	1	0	0	0	0
21ur-6620	0	3	0	0	0	0	0	0	0
21ur-664	0	0	1	0	0	0	1	0	0
21ur-6657	0	0	3	0	0	5	0	0	0
21ur-6658	0	0	0	2	0	0	0	0	0
21ur-6659	0	0	0	0	3	0	1	0	0
21ur-6661	21	10	15	0	6	20	8	0	0
21ur-6674	0	3	0	1	0	0	5	12	4
21ur-6675	0	0	12	0	0	0	0	0	5
21ur-6682	0	0	2	0	0	4	0	0	0
21ur-6686	0	0	0	0	3	0	0	0	0
21ur-67	0	0	0	0	0	1	2	0	0
21ur-6703	0	0	0	1	0	0	0	0	0
21ur-6714	0	0	7	0	0	0	3	0	0
21ur-6726	0	0	2	0	0	0	0	0	8
21ur-6729	0	0	0	0	1	0	0	2	0
21ur-6763	0	1	0	0	0	0	0	0	0
21ur-6773	0	0	0	0	0	0	0	3	0
21ur-6778	0	1	0	0	0	0	0	0	0
21ur-6783	0	0	0	0	0	0	0	0	8
21ur-6799	0	4	0	0	0	0	0	0	0
21ur-6812	0	0	8	1	2	0	0	0	0
21ur-6835	0	0	1	0	0	4	0	0	0
21ur-6844	0	1	0	0	0	0	0	0	0
21ur-6857	0	0	1	0	0	2	0	3	0
21ur-6874	0	0	0	0	0	0	3	1	0
21ur-6876	0	0	0	0	0	0	0	1	0
21ur-6883	0	0	0	0	0	0	0	9	0
21ur-6895	0	4	0	0	0	0	0	0	0
21ur-6923	11	0	0	0	0	0	0	0	0
21ur-6930	0	3	0	0	0	0	0	0	0
21ur-6936	0	0	0	0	0	1	0	0	0
21ur-6937	0	0	1	0	0	0	0	0	0
21ur-694	0	0	0	0	0	1	0	2	0
21ur-6940	0	0	0	2	0	0	0	0	0
21ur-6949	0	0	0	2	0	0	0	0	0
21ur-6950	0	0	0	0	0	0	4	0	0
21ur-6952	0	0	0	0	2	0	3	0	0
21ur-6955	0	0	0	0	0	0	11	0	0
21ur-6956	0	0	0	4	0	6	0	0	0
21ur-6965	0	3	2	0	2	0	0	0	0
21ur-6967	0	0	0	0	0	0	0	0	1
21ur-6975	0	0	0	0	0	3	1	0	0
21ur-6985	0	0	0	0	0	0	3	0	0
21ur-6997	10	0	0	0	0	0	0	0	0
21ur-6999	0	0	0	0	0	1	0	0	0
21ur-7008	0	0	0	0	0	10	0	0	0
21ur-7019	0	0	0	1	0	0	1	0	0
21ur-7020	5	0	0	0	0	2	0	0	0
21ur-7021	0	0	0	0	0	0	0	2	0
21ur-7034	0	8	0	0	0	0	0	0	0
21ur-7041	0	0	0	0	0	2	0	0	0
21ur-7042	0	0	0	0	0	0	0	3	0
21ur-7043	0	0	4	0	0	0	2	0	0
21ur-7049	0	3	5	0	0	1	0	0	0
21ur-7050	0	0	0	0	0	2	0	0	0
21ur-7065	0	0	2	0	0	2	4	0	0
21ur-7077	0	0	0	0	0	0	0	3	0
21ur-710	0	1	0	0	0	0	0	0	0
21ur-7108	0	0	0	0	0	4	0	0	0
21ur-7115	0	0	0	0	0	1	0	0	0
21ur-7126	0	0	0	2	0	0	0	0	0
21ur-7143	0	0	0	0	0	0	0	5	0
21ur-7151	0	0	0	1	0	1	0	2	0
21ur-7159	0	0	2	0	0	0	0	0	0
21ur-7164	0	3	0	0	0	0	0	0	0
21ur-7170	0	0	1	0	0	3	0	0	0
21ur-7173	0	0	0	2	0	0	0	0	3
21ur-718	40	0	0	0	0	4	0	0	0
21ur-7183	0	0	0	0	0	0	0	2	0
21ur-719	0	3	0	0	0	3	0	1	3
21ur-7191	0	5	0	0	0	8	0	0	0
21ur-7201	0	1	0	0	0	0	0	0	0
21ur-7212	0	0	0	0	0	6	0	11	0
21ur-722	0	3	0	1	0	7	0	0	13
21ur-7229	0	1	0	0	0	3	0	0	0
21ur-7234	0	0	0	3	2	0	0	0	0
21ur-7244	0	0	0	0	1	0	0	0	0
21ur-725	16	0	0	0	0	0	0	0	0
21ur-7260	0	0	0	0	0	1	0	0	0
21ur-7261	0	0	2	0	0	0	0	0	0
21ur-7264	0	0	0	0	0	1	0	0	0
21ur-7272	0	1	0	0	0	0	0	0	0
21ur-7276	0	0	0	0	0	1	0	0	0
21ur-7285	29	0	0	0	0	0	1	0	0
21ur-7314	0	6	0	0	0	2	0	0	0
21ur-7327	0	0	0	0	0	0	1	0	0
21ur-7331	0	0	0	0	0	0	0	2	0
21ur-7333	0	0	0	0	0	0	0	3	0
21ur-7337	0	0	2	0	0	0	0	0	0
21ur-7340	5	0	0	0	0	0	0	0	0
21ur-7348	0	0	0	0	0	0	0	1	0
21ur-735	0	0	0	0	0	2	0	0	0
21ur-7352	0	0	0	0	0	0	1	0	0
21ur-7362	0	0	1	0	0	0	0	0	0
21ur-7372	0	0	0	0	0	0	1	0	0
21ur-7377	21	0	2	0	0	0	0	2	0
21ur-7384	0	5	0	0	0	0	0	0	0
21ur-7385	0	0	5	3	3	7	5	0	2
21ur-741	3	0	0	0	0	0	0	0	0
21ur-7421	0	0	0	0	0	0	0	4	0
21ur-7422	0	0	0	0	0	0	0	3	0
21ur-7426	0	0	0	0	0	0	0	4	0
21ur-7443	0	0	0	0	0	0	2	0	0
21ur-7445	0	0	0	0	0	0	0	1	0
21ur-745	0	0	0	3	0	0	0	0	0
21ur-7468	0	0	0	0	0	0	0	3	0
21ur-7470	0	0	0	0	0	3	0	0	0
21ur-7484	0	0	0	2	0	1	0	0	3
21ur-7488	0	0	1	0	0	2	0	0	0
21ur-7490	0	0	0	0	0	0	1	0	0
21ur-7508	0	0	0	3	7	0	0	0	0
21ur-7509	0	0	0	2	0	0	0	0	0
21ur-7513	0	0	0	0	2	0	0	0	0
21ur-7520	0	0	0	5	0	0	0	0	0
21ur-7527	0	0	0	0	0	0	0	1	0
21ur-7530	0	0	0	0	0	0	0	7	0
21ur-7533	0	0	0	0	0	2	0	0	0
21ur-7540	0	0	0	0	3	0	0	0	0
21ur-7548	0	0	0	0	0	11	2	0	0
21ur-7555	0	0	0	3	0	0	0	0	0
21ur-7565	15	0	3	0	0	5	3	1	0
21ur-7579	0	0	0	0	0	0	0	1	0
21ur-7583	0	0	0	0	0	0	0	0	2
21ur-7586	0	4	0	0	0	0	0	0	0
21ur-7600	0	2	3	0	0	0	0	0	0
21ur-763	8	6	0	0	0	0	0	0	0
21ur-7630	0	0	0	0	0	0	0	3	0
21ur-7653	18	0	0	0	0	4	0	0	0
21ur-7656	0	0	0	0	0	0	6	0	0
21ur-7661	0	0	0	0	0	2	0	0	0
21ur-7667	0	0	0	0	5	0	0	0	0
21ur-7684	0	0	0	0	0	0	0	3	0
21ur-7693	0	0	0	0	0	5	0	0	0
21ur-7707	0	0	2	0	0	0	0	0	0
21ur-7716	0	0	2	0	0	0	0	0	0
21ur-7717	0	0	0	0	0	0	2	0	0
21ur-7725	0	0	7	0	0	8	0	0	0
21ur-773	0	0	0	1	0	0	0	0	0
21ur-7740	0	0	0	0	1	0	2	0	4
21ur-7749	0	3	1	0	1	0	3	0	0
21ur-7761	0	0	0	0	0	0	2	0	0
21ur-7762	0	2	0	0	0	6	0	8	0
21ur-7769	0	0	0	0	0	0	0	5	0
21ur-7772	0	0	0	0	0	3	0	0	0
21ur-7774	0	0	0	0	0	1	0	0	0
21ur-7782	0	1	0	0	0	0	0	0	0
21ur-7796	0	2	2	0	0	3	2	0	0
21ur-781	0	0	2	0	0	0	0	0	0
21ur-7812	0	0	0	0	0	1	0	0	0
21ur-7813	0	0	0	0	0	0	10	0	0
21ur-7815	0	7	0	0	0	0	3	9	4
21ur-7825	0	0	0	2	0	0	0	0	0
21ur-7827	0	1	1	2	1	3	0	6	0
21ur-7832	0	10	0	0	0	0	1	2	0
21ur-7837	0	0	1	0	0	0	0	0	0
21ur-7844	0	0	0	0	0	0	4	0	0
21ur-7847	7	0	0	0	0	0	0	0	0
21ur-7848	0	0	0	0	1	3	0	0	0
21ur-7850	0	10	0	0	0	0	0	0	0
21ur-7854	0	0	5	0	0	2	0	1	0
21ur-7860	0	0	0	0	0	5	0	0	0
21ur-7861	0	0	5	0	0	0	4	0	0
21ur-7862	0	0	2	0	0	0	0	0	0
21ur-7864	0	0	0	0	0	0	0	1	3
21ur-7874	0	0	0	0	0	0	2	1	0
21ur-7888	0	0	0	0	0	0	0	6	0
21ur-7889	0	0	1	0	0	0	0	0	0
21ur-7897	0	0	0	0	1	0	0	0	0
21ur-791	0	0	0	2	2	2	0	0	0
21ur-7916	0	0	6	0	0	0	0	0	0
21ur-7932	0	0	5	0	0	0	0	0	0
21ur-7941	0	0	4	0	0	0	0	0	0
21ur-7947	0	0	0	2	2	0	2	40	0
21ur-7964	0	0	2	0	0	0	0	0	0
21ur-7967	0	0	0	1	0	3	0	0	0
21ur-7970	0	0	0	0	0	0	1	0	0
21ur-7977	0	0	0	0	0	0	2	0	0
21ur-7999	0	1	0	0	0	0	0	0	0
21ur-8	0	0	0	0	0	0	0	1	0
21ur-8019	0	0	2	0	0	0	0	0	0
21ur-802	0	0	0	1	2	0	0	0	0
21ur-8030	0	0	4	0	0	5	0	0	0
21ur-804	0	0	0	0	2	0	0	0	0
21ur-8056	0	1	0	0	0	0	0	0	0
21ur-8057	0	0	1	0	0	0	0	0	0
21ur-8063	0	0	0	0	0	0	4	0	0
21ur-8066	0	0	0	0	0	0	0	2	0
21ur-8083	0	4	0	0	5	0	0	0	0
21ur-8102	0	0	7	0	0	4	0	0	0
21ur-8108	0	0	0	0	0	0	0	3	3
21ur-8111	19	6	0	2	0	0	0	0	0
21ur-8112	0	3	0	0	0	0	0	0	0
21ur-8113	0	0	1	0	0	0	0	0	0
21ur-8126	0	0	1	1	0	0	0	0	0
21ur-8145	0	0	1	0	0	0	0	0	0
21ur-8152	0	0	3	0	0	0	0	0	0
21ur-8153	0	0	0	1	0	0	0	0	0
21ur-8157	0	0	0	2	0	0	0	0	0
21ur-8163	0	0	0	1	0	0	0	1	0
21ur-8164	0	0	4	0	0	0	0	0	0
21ur-817	0	4	0	0	0	0	0	0	0
21ur-8182	0	0	1	0	0	1	0	0	0
21ur-8192	0	0	3	0	0	0	0	0	0
21ur-8202	0	0	1	0	0	0	0	0	0
21ur-8203	0	0	0	0	0	0	0	5	0
21ur-8213	0	4	0	0	0	0	0	0	0
21ur-8219	0	0	1	0	0	1	5	1	0
21ur-8220	0	0	0	0	3	0	0	0	0
21ur-823	0	0	2	0	0	0	0	0	0
21ur-8244	0	0	0	0	0	0	3	0	0
21ur-8245	0	1	0	0	0	0	0	2	0
21ur-8255	0	0	0	0	0	1	0	0	0
21ur-8261	0	1	0	0	0	2	0	0	0
21ur-829	0	0	0	0	0	0	0	0	2
21ur-8300	0	1	0	0	0	0	0	0	0
21ur-8313	0	0	0	0	0	2	1	1	1
21ur-8326	0	0	0	8	0	0	0	0	0
21ur-8332	0	0	0	0	0	1	0	0	0
21ur-8333	0	0	0	0	0	2	0	1	0
21ur-8344	0	0	0	0	0	2	0	0	0
21ur-8376	0	0	0	0	0	1	0	0	0
21ur-8397	0	0	4	0	0	0	0	0	0
21ur-840	0	1	0	0	0	0	0	0	0
21ur-8402	0	0	0	0	0	0	0	2	0
21ur-842	0	0	0	4	0	0	20	2	0
21ur-8421	0	0	0	0	1	6	0	0	0
21ur-8422	0	0	2	0	0	0	0	0	0
21ur-843	0	0	0	0	0	3	0	0	0
21ur-8434	0	0	1	0	0	0	0	0	0
21ur-8437	0	0	0	0	0	1	0	0	0
21ur-8446	0	0	0	1	0	2	0	0	0
21ur-8451	0	0	0	0	0	1	0	0	0
21ur-8456	0	0	0	0	0	0	0	0	1
21ur-8469	0	3	0	0	0	0	7	0	0
21ur-8474	0	0	0	0	2	0	1	0	0
21ur-8478	0	0	0	0	0	1	0	0	0
21ur-8479	0	2	0	0	0	0	0	0	0
21ur-8480	0	0	0	0	0	0	0	3	0
21ur-8484	0	0	0	0	0	1	0	0	0
21ur-8488	0	0	1	3	0	0	0	5	4
21ur-8491	0	10	0	0	0	4	0	0	0
21ur-8507	0	1	0	0	0	0	0	0	0
21ur-8530	0	0	1	0	0	0	0	0	0
21ur-8535	0	0	0	0	1	0	4	24	5
21ur-8545	0	0	0	0	0	0	0	1	0
21ur-8552	0	0	0	0	0	0	3	0	0
21ur-8555	0	0	1	0	0	2	0	0	0
21ur-8565	0	0	0	1	0	0	0	3	0
21ur-8577	0	4	0	0	0	0	0	0	0
21ur-8583	0	0	0	0	0	0	1	0	0
21ur-8585	3	0	0	0	0	0	2	0	0
21ur-8587	0	0	0	0	0	3	0	2	0
21ur-8588	0	0	0	0	0	0	0	3	0
21ur-8595	0	0	0	0	2	0	0	0	0
21ur-8598	0	0	0	0	0	0	1	0	0
21ur-860	0	0	0	0	1	4	0	8	0
21ur-8602	0	13	7	4	0	4	1	7	1
21ur-8609	0	0	1	0	0	0	0	0	0
21ur-8622	0	0	0	0	0	0	0	5	0
21ur-8630	0	0	1	0	1	0	0	0	0
21ur-8632	0	1	7	0	0	1	1	0	0
21ur-8641	0	0	0	0	0	0	0	3	0
21ur-8645	0	0	0	0	0	1	0	0	0
21ur-8647	0	0	0	5	0	0	0	0	0
21ur-8648	0	0	0	0	0	2	0	0	0
21ur-8652	0	0	0	0	0	1	0	0	0
21ur-8655	0	0	1	0	0	0	0	0	0
21ur-8662	0	0	3	0	1	3	6	0	0
21ur-8671	0	2	3	0	0	3	9	0	0
21ur-8673	0	0	0	0	0	0	0	3	0
21ur-8682	16	0	0	0	0	0	0	0	0
21ur-8695	0	0	0	0	0	1	1	0	0
21ur-870	0	0	0	0	0	0	0	0	3
21ur-872	0	0	3	0	0	0	0	2	0
21ur-8720	0	0	0	0	0	3	0	0	0
21ur-8742	0	0	7	3	13	6	7	3	0
21ur-8750	0	3	0	0	0	3	0	0	0
21ur-8752	0	0	0	0	0	0	0	2	0
21ur-8767	0	0	2	0	0	0	0	0	0
21ur-8789	0	0	0	1	0	0	1	41	3
21ur-8792	0	0	0	2	0	0	0	0	0
21ur-8804	0	0	0	0	0	0	0	1	2
21ur-8809	0	0	0	0	0	0	0	3	0
21ur-882	0	0	0	0	0	0	0	1	0
21ur-883	0	0	3	0	0	0	0	0	0
21ur-8832	0	0	1	0	0	0	1	0	0
21ur-8837	0	0	0	4	0	0	0	0	0
21ur-8841	18	0	0	0	0	0	0	0	0
21ur-8859	0	0	0	0	0	3	0	0	0
21ur-8863	0	0	0	0	0	8	0	2	0
21ur-8879	0	0	0	0	0	1	0	0	0
21ur-8881	0	0	0	0	0	3	6	0	0
21ur-8895	0	0	1	0	0	0	0	0	0
21ur-8899	0	0	4	0	0	0	0	0	0
21ur-8910	0	2	0	0	0	0	0	0	0
21ur-8915	0	5	0	0	0	0	0	0	0
21ur-8918	0	0	0	0	1	0	0	0	0
21ur-8932	0	0	0	0	0	0	0	1	0
21ur-8940	0	0	2	0	0	6	0	0	0
21ur-8968	0	0	1	0	0	0	0	0	0
21ur-8976	0	0	0	0	0	3	0	0	0
21ur-898	0	0	0	0	0	6	7	0	0
21ur-8989	0	0	0	1	0	0	0	0	0
21ur-8998	0	0	0	0	0	5	0	0	0
21ur-9006	0	0	1	2	0	0	0	0	0
21ur-9013	0	0	0	1	0	0	0	0	0
21ur-9015	0	0	0	9	0	0	0	0	0
21ur-9021	0	0	2	0	0	0	0	0	0
21ur-9026	0	0	0	0	0	0	0	1	0
21ur-9027	0	0	0	0	0	5	0	0	0
21ur-903	0	0	0	0	0	0	0	0	1
21ur-9034	0	0	0	0	0	0	0	4	0
21ur-9039	0	1	0	0	0	0	0	0	0
21ur-9064	0	0	0	0	0	0	0	3	0
21ur-907	0	0	0	0	0	0	0	1	0
21ur-9076	0	0	0	0	0	3	0	0	0
21ur-9078	0	0	0	0	0	2	0	0	0
21ur-9079	0	0	0	0	0	0	2	0	0
21ur-9089	0	3	0	0	0	2	0	0	0
21ur-9094	0	0	0	0	0	0	0	0	10
21ur-9108	0	0	3	0	0	0	0	0	0
21ur-9114	0	0	1	0	1	0	4	0	0
21ur-9121	0	0	0	0	0	0	1	0	0
21ur-9134	0	0	0	0	0	0	1	0	0
21ur-9135	38	0	0	0	0	0	0	0	0
21ur-915	0	8	5	0	0	1	0	0	0
21ur-9164	0	10	16	0	0	12	1	0	0
21ur-9171	0	0	3	0	0	0	0	0	0
21ur-9186	0	0	0	0	0	0	0	0	4
21ur-9197	0	0	0	0	0	6	0	0	0
21ur-9205	0	4	0	0	0	0	0	0	0
21ur-9207	0	0	0	0	0	3	0	0	1
21ur-9220	0	0	0	1	0	0	0	0	0
21ur-9228	0	7	0	0	0	0	0	0	0
21ur-9241	0	0	0	0	0	0	0	8	4
21ur-9244	0	0	0	0	0	0	0	1	0
21ur-9251	0	0	1	0	0	3	0	0	0
21ur-9267	0	0	0	0	0	2	0	0	0
21ur-927	0	1	0	0	0	0	0	0	0
21ur-9280	0	1	0	0	0	0	0	0	0
21ur-9292	0	0	0	0	1	0	0	0	0
21ur-9299	7	0	0	0	0	0	0	0	0
21ur-9300	0	0	2	0	0	0	0	0	0
21ur-9310	0	0	0	2	0	0	0	0	0
21ur-9312	0	0	5	0	0	2	7	0	0
21ur-9319	0	0	0	0	0	2	0	0	0
21ur-932	12	0	0	0	0	1	0	0	0
21ur-9320	14	0	0	0	0	0	0	0	0
21ur-9324	0	0	0	0	2	2	0	0	1
21ur-9329	0	0	0	0	0	0	0	1	0
21ur-9335	0	0	6	0	0	0	0	0	0
21ur-9336	0	0	0	0	0	0	5	0	0
21ur-9355	0	6	1	0	2	2	0	0	0
21ur-936	0	0	0	2	2	2	0	16	7
21ur-9362	0	0	0	0	0	0	0	8	4
21ur-937	0	0	0	0	0	0	2	2	0
21ur-9371	0	0	0	0	0	0	0	11	0
21ur-9375	0	0	0	0	0	1	4	0	0
21ur-9383	0	0	0	0	0	3	1	0	0
21ur-9384	23	0	0	0	0	0	2	0	0
21ur-9391	0	0	0	0	1	2	0	0	2
21ur-9402	0	0	0	0	1	0	0	0	0
21ur-941	0	0	0	0	2	1	8	8	4
21ur-9425	0	0	1	0	0	9	7	0	0
21ur-9432	0	0	0	1	0	3	11	0	0
21ur-9449	0	0	1	0	0	0	1	0	0
21ur-9452	0	3	8	4	1	9	1	7	4
21ur-9469	21	0	0	0	0	0	0	0	0
21ur-9482	0	0	0	0	0	0	0	2	0
21ur-9485	0	0	0	0	0	0	0	1	2
21ur-9489	0	0	0	0	1	0	0	0	0
21ur-9490	0	0	0	0	0	0	0	2	0
21ur-9498	0	0	0	0	0	0	6	0	0
21ur-950	0	0	2	0	0	0	0	0	0
21ur-9519	0	1	0	0	0	0	0	0	0
21ur-9521	0	0	0	0	0	0	0	1	0
21ur-9523	0	0	0	0	0	0	0	6	0
21ur-956	0	4	0	0	0	0	0	0	0
21ur-9572	0	0	0	2	0	2	0	22	1
21ur-9574	0	0	0	2	0	0	7	15	9
21ur-9578	0	0	0	0	2	0	0	1	0
21ur-9588	0	0	0	0	0	0	0	3	0
21ur-9601	0	5	0	0	0	5	2	0	0
21ur-961	0	0	1	0	0	0	0	0	0
21ur-9615	13	0	2	0	0	6	3	0	0
21ur-9624	0	0	0	0	0	0	0	5	0
21ur-9628	0	1	0	0	3	0	0	0	0
21ur-963	0	0	0	0	0	0	7	15	2
21ur-9639	0	0	3	0	1	0	1	0	0
21ur-964	0	0	0	0	0	0	0	14	0
21ur-9650	0	2	0	0	0	4	5	0	0
21ur-9667	0	0	0	0	0	0	0	0	1
21ur-9668	0	0	0	1	0	0	0	0	0
21ur-97	0	0	0	0	0	5	0	0	0
21ur-971	0	0	3	0	1	1	0	3	0
21ur-9710	0	0	0	11	0	0	0	4	0
21ur-9715	0	0	0	6	0	0	0	6	3
21ur-973	0	0	0	0	0	0	1	0	0
21ur-9730	0	0	0	0	0	0	3	0	0
21ur-9738	0	0	0	0	0	0	0	0	3
21ur-9740	0	2	0	0	0	0	0	0	0
21ur-9743	0	0	0	1	5	0	0	0	6
21ur-9746	0	4	0	0	0	0	0	0	0
21ur-9747	0	0	0	0	0	4	0	0	0
21ur-9748	0	3	1	0	0	0	0	0	0
21ur-9751	0	0	2	0	0	5	0	0	0
21ur-9752	0	0	0	0	0	3	9	0	10
21ur-98	0	0	0	0	0	1	0	0	0
21ur-980	0	0	0	0	0	5	0	0	0
21ur-9809	0	0	0	0	0	0	0	2	0
21ur-983	46	0	9	0	0	5	11	0	0
21ur-9831	0	2	0	0	0	0	0	0	0
21ur-9838	0	0	0	0	0	2	0	0	0
21ur-9869	0	3	0	0	0	0	0	0	0
21ur-9901	0	0	0	1	0	0	0	0	0
21ur-9926	17	0	0	0	0	0	0	0	0
21ur-9932	0	0	0	0	1	0	0	0	0
21ur-9940	0	0	0	0	0	0	2	0	0
21ur-995	0	0	0	0	0	0	7	0	0
21ur-9953	0	0	0	0	0	3	0	0	0
21ur-9961	0	0	0	0	0	2	0	0	0
21ur-9962	0	0	0	0	0	0	2	0	0
21ur-9982	0	7	0	19	9	36	14	37	29
21ur-9989	0	0	1	0	0	0	0	0	0
21ur-9996	0	0	0	0	0	3	1	5	3
21ur-9999	0	0	0	0	4	8	4	0	0
2L52.1	21	37	45	47	20	88	95	1	6
2RSSE.1	41	99	63	31	10	46	24	4	0
4R79.2	0	0	0	0	0	10	0	0	0
6R55.2	0	0	0	0	7	14	0	0	0
AC3.12	0	0	0	0	3	0	0	2	0
AC3.5	15	0	0	19	17	4	0	0	0
AC7.3	0	0	0	1	0	0	0	0	0
AH10.10	0	0	0	1	0	5	0	19	1
AH10.2	0	27	0	0	11	0	0	0	23
AH10.3	0	0	0	2	4	1	4	3	8
AH10.4	6	4	16	2	1	1	1	0	2
AH10.8	0	0	0	2	0	0	0	1	0
AH6.17	0	0	4	11	1	0	5	2	0
AH6.3	0	0	0	0	17	0	0	3	0
AH9.1	94	41	70	127	60	68	48	2	6
AH9.3	54	187	155	36	72	263	177	19	0
AH9.4	0	0	0	0	9	0	0	3	0
AH9.6	2	25	106	0	38	216	1	0	23
AH9.7	29	32	22	30	39	8	1	1	9
AH9.9	2	5	0	1	4	1	0	0	0
B0001.10	82	137	128	100	30	80	90	30	23
B0001.11	8	7	9	3	0	12	7	12	17
B0001.12	18	2	0	7	3	5	0	40	20
B0001.2	18720	28437	24114	18278	9245	33814	33855	33320	38202
B0001.3	2118	3787	2393	3000	3300	5110	5565	5858	7917
B0001.4	3008	4163	3308	1433	2396	2947	2956	2990	3475
B0001.5	3326	4165	3276	6623	6385	6314	5508	6578	10229
B0001.7	3348	5251	4088	3478	4711	6475	7609	11139	14307
B0001.8	3775	3639	2813	2037	2049	3890	3503	4395	5249
B0019.2	2763	3682	3045	2474	2202	3710	3897	3980	5514
B0024.10	4153	6215	4259	3238	2897	2595	2864	1844	2602
B0024.11	5487	7194	5301	5071	4035	4070	3327	1834	3808
B0024.13	478	824	665	705	575	666	580	592	970
B0024.15	0	0	0	0	0	19	0	0	0
B0024.17	0	0	6	0	0	0	0	10	0
B0024.18	0	0	0	7	2	5	8	0	0
B0024.3	0	0	0	1	17	0	0	22	9
B0024.4	0	0	1	0	0	0	21	5	21
B0025.4	456	718	665	437	599	681	379	1257	1358
B0025.5	68	0	0	6	5	12	21	17	26
B0025.6	10	2	0	0	0	0	0	0	0
B0025.7	41	95	82	37	11	80	65	31	25
B0025.8	8	0	0	0	1	0	0	13	1
B0034.1	0	0	28	15	3	42	0	0	0
B0034.14	0	0	0	0	0	0	0	3	0
B0034.15	0	0	0	5	2	0	0	0	0
B0034.17	0	0	0	0	0	2	0	0	0
B0034.2	0	0	0	0	0	6	0	3	0
B0034.4	0	20	0	0	18	2	0	0	0
B0035.1	5666	9257	7454	3251	2835	5860	6252	3835	3763
B0035.12	22285	33901	22157	8292	10553	4881	8046	5900	7890
B0035.13	247	46	24	131	13	32	2	46	8
B0035.15	3049	2590	2210	1754	1277	4117	2948	4148	5045
B0035.18	249	249	173	220	213	287	167	975	809
B0035.19	15	85	94	19	34	25	51	233	111
B0035.21	42	28	40	63	29	43	50	73	64
B0035.3	12531	14681	11866	2441	3379	2659	3458	1922	2396
B0035.6	8581	18662	13096	5777	7193	10550	17050	9131	10269
B0041.1	99	8	16	8	18	3	28	2	9
B0041.10	57	23	44	10	4	77	45	60	10
B0041.11	74	76	37	89	107	114	17	48	9
B0041.5	6196	7697	6660	3810	3115	6739	6656	7360	7577
B0041.8	69237	88361	60729	41494	49536	40214	43066	87247	77647
B0198.2	0	0	0	0	0	43	20	2	0
B0198.3	0	198	64	2	0	203	27	8	1
B0205.1	2441	5486	4059	3023	3071	5283	4851	3234	4456
B0205.10	0	1	0	3	15	46	0	0	0
B0205.12	54	69	34	21	20	41	48	44	61
B0205.13	254	172	203	658	1493	92	33	116	137
B0205.14	0	12	10	30	90	8	3	2	8
B0205.15	0	0	0	0	0	4	0	0	0
B0205.16	0	10	1	0	1	0	0	6	3
B0205.4	15	1	0	5	7	17	24	3	0
B0205.5	0	0	9	7	9	12	6	12	15
B0205.6	3575	4524	2944	3135	4052	2214	2186	3493	5108
B0205.8	1392	2500	1779	630	662	1524	1081	1568	1427
B0205.9	1352	3174	2349	1504	1567	1449	1764	301	1113
B0207.1	0	15	38	0	29	0	0	3	0
B0207.10	0	0	0	0	1	0	0	0	0
B0207.11	0	0	0	0	0	0	0	4	0
B0207.15	0	0	0	0	0	0	0	4	0
B0207.2	0	0	0	0	1	13	2	0	0
B0207.5	0	39	0	129	106	112	5	27	0
B0207.6	1670	2391	1996	1712	1427	1913	1863	2343	2382
B0207.7	0	0	30	7	22	0	0	2	0
B0207.8	0	0	0	0	0	0	0	2	0
B0212.3	2391	2700	2340	1194	350	116	450	53	21
B0218.5	0	0	60	0	31	0	0	8	0
B0218.7	0	0	2	0	9	0	0	2	0
B0222.1	0	0	0	0	28	0	6	0	0
B0222.10	19	35	18	0	0	0	9	1	0
B0222.11	64	0	3	0	0	27	0	0	0
B0222.15	0	0	1	0	0	2	0	0	0
B0222.5	0	0	0	7	20	0	0	1	0
B0228.1	101	47	53	12	69	50	28	0	36
B0228.10	0	0	0	1	0	7	2	0	0
B0228.6	341	344	536	131	297	662	231	0	2
B0228.7	1597	1974	1057	4523	3630	5701	5006	17663	16865
B0228.8	69	0	0	2	0	1	0	0	0
B0228.9	20	1	0	0	0	5	0	55	0
B0238.1	499	336	204	48	152	99	243	67	67
B0238.10	3686	4501	3227	781	626	1435	1234	619	626
B0238.11	5748	7557	6312	2690	2506	7086	5435	3817	4150
B0238.12	0	12	48	23	74	0	0	80	6
B0238.13	0	0	1	0	0	0	0	1	0
B0238.15	12	57	38	7	2	17	7	0	1
B0238.9	966	2976	1499	1511	2548	411	1902	356	1057
B0240.6	0	0	2	0	0	0	0	5	0
B0244.10	0	12	77	243	703	78	75	2	0
B0244.15	0	0	0	0	1	6	4	3	0
B0244.4	13	82	34	0	1	24	66	52	16
B0244.5	61	0	9	0	0	49	0	1	0
B0244.6	0	0	8	7	106	0	1	4	0
B0244.7	0	1	0	12	1	35	0	39	41
B0244.9	0	18	0	17	26	79	10	269	135
B0250.15	0	0	0	2	0	0	0	8	7
B0250.16	0	0	0	1	0	4	0	0	0
B0250.17	0	1	0	9	0	9	0	0	0
B0250.18	0	5	30	5	7	58	29	0	0
B0250.19	0	0	0	0	3	1	0	8	3
B0250.5	573	1518	962	336	312	2201	1312	1013	1352
B0250.7	899	1405	1211	1851	1482	2602	3547	6002	5434
B0250.8	0	13	40	20	20	86	184	7	128
B0252.1	0	0	0	12	10	0	101	33	0
B0252.3	11	153	224	24	96	16	34	18	56
B0252.5	0	0	0	0	9	1	0	0	0
B0252.8	0	0	3	0	0	0	0	2	0
B0261.1	4804	9038	6505	7587	7688	8163	7838	5887	9437
B0261.5	0	0	1	20	13	2	0	0	4
B0261.6	65	113	90	116	87	43	74	551	679
B0261.7	5506	9458	6970	2453	2232	6731	8076	4876	4876
B0261.8	415	309	180	604	559	426	230	219	191
B0261.9	0	67	10	16	44	14	38	195	96
B0272.3	411	742	310	361	427	390	210	2	1
B0272.4	39	0	0	0	20	18	4	0	0
B0273.1	19	16	12	52	127	4	0	0	0
B0273.111	0	0	0	0	0	0	0	2	0
B0273.112	0	0	4	0	0	14	0	0	0
B0273.114	0	1	0	0	0	23	0	1	0
B0273.115	8	7	2	3	33	4	0	15	0
B0280.11	0	31	6	4	16	3	26	2	15
B0280.13	0	0	5	6	5	0	0	1	0
B0280.17	55	61	37	109	117	88	87	231	269
B0280.2	4	0	0	29	23	11	0	0	1
B0280.7	0	31	189	35	109	96	58	0	0
B0280.9	2216	1938	1917	2231	1685	3222	1825	2948	2675
B0281.4	0	1	12	23	0	54	26	4	0
B0281.5	1487	1788	1682	26	169	352	667	1	58
B0284.1	0	41	6	2898	3901	46	58	12	98
B0284.2	124	92	72	3297	4311	222	135	271	695
B0284.3	36	41	8	59	62	21	24	0	0
B0284.4	0	0	0	83	144	26	0	0	0
B0284.6	0	4	0	25	26	0	11	0	0
B0285.12	0	0	2	0	0	7	0	0	0
B0285.14	0	0	2	0	1	0	0	3	0
B0285.15	21	0	0	0	0	0	0	0	0
B0285.16	0	0	0	0	0	7	6	0	0
B0285.17	0	2	16	0	2	2	6	0	0
B0285.3	2817	4570	3426	3614	4114	3003	2900	4043	5947
B0285.4	1366	1410	1331	1306	1209	2434	1141	2712	2025
B0285.6	0	10	12	0	21	75	33	8	43
B0286.1	80	62	131	2	35	272	68	0	8
B0286.3	178	624	302	197	342	288	336	50	94
B0294.1	0	0	14	17	23	0	0	0	0
B0294.3	0	24	0	12	6	0	17	0	0
B0302.2	19	0	0	0	0	0	0	0	0
B0302.4	0	0	0	1	1	4	0	0	0
B0302.5	0	17	13	0	0	37	0	3	0
B0302.7	0	0	0	0	0	0	0	1	0
B0303.11	107	44	27	12	145	8	0	30	0
B0303.14	0	0	37	0	35	36	48	0	0
B0303.16	0	0	0	0	1	0	7	0	0
B0303.17	0	0	0	0	0	0	0	1	0
B0303.3	3204	4185	3414	1464	1386	1676	926	2897	2928
B0303.4	4955	9680	7143	1668	1957	3548	7280	3596	3369
B0303.7	2191	3630	2275	544	1939	258	315	124	148
B0304.10	0	0	0	0	0	2	0	0	0
B0304.2	607	1040	762	887	867	1754	1104	2366	2715
B0304.4	1764	1328	1119	1847	1917	3854	1984	11232	11269
B0310.1	134	189	92	0	54	106	74	0	79
B0310.2	0	0	22	0	0	29	0	1	0
B0310.3	0	0	0	1	0	1	0	0	0
B0310.6	0	0	0	6	1	1	0	0	0
B0310.8	15	0	0	0	0	0	0	0	0
B0334.10	40	81	64	235	128	197	111	216	281
B0334.12	0	0	0	0	4	0	0	0	0
B0334.13	0	0	0	0	10	0	0	7	0
B0334.17	0	2	1	0	0	13	1	0	5
B0334.18	0	0	1	0	0	1	0	3	3
B0334.19	0	1	0	0	3	0	0	6	0
B0334.20	0	0	0	2	1	2	3	5	2
B0334.3	2570	3103	3277	1367	1675	4379	4430	535	1689
B0334.4	2287	3338	2966	1177	1251	1627	796	2856	2557
B0334.5	2684	5823	4691	1912	2178	3107	5292	2162	4041
B0334.6	0	4	12	3	47	24	0	2	0
B0336.12	33	14	11	26	28	28	8	122	35
B0336.13	698	1077	808	370	465	783	956	447	846
B0336.16	7	13	13	2	4	5	8	1	11
B0336.3	2021	3718	2609	2110	1694	1678	2527	1160	1381
B0336.5	3981	5214	3467	2049	3197	3092	4834	10619	10656
B0336.7	4417	6073	5424	3212	2812	4457	3022	4267	4780
B0344.4	0	3	11	0	0	11	3	1	0
B0348.2	0	0	7	2	5	19	0	4	0
B0348.5	0	0	3	0	10	6	6	25	39
B0348.8	0	0	0	0	0	6	2	0	0
B0348.9	35	0	0	0	0	23	2	8	0
B0350.70	0	1	0	0	0	3	0	0	0
B0350.71	0	0	0	0	1	7	0	0	0
B0350.72	0	0	0	0	6	0	0	0	0
B0350.74	1	0	0	0	0	0	0	0	0
B0350.75	0	3	30	0	0	9	5	0	0
B0350.76	16	1	4	0	0	10	1	0	0
B0350.78	0	9	11	0	0	15	0	0	0
B0350.79	0	0	1	0	0	0	0	2	0
B0350.80	0	5	31	1	2	8	10	0	0
B0350.82	0	3	0	0	0	6	0	0	0
B0350.84	0	0	0	0	0	2	0	0	0
B0350.85	0	0	0	0	0	1	0	0	0
B0353.1	40	54	15	14	109	44	76	0	8
B0361.11	12	163	195	283	753	18	92	113	84
B0361.13	0	0	0	0	1	0	0	0	0
B0361.2	2375	3186	2126	2905	1952	2892	2027	3352	4139
B0361.3	15167	17649	12514	5798	6665	3545	6718	4420	5160
B0361.4	8	0	0	17	18	12	28	33	3
B0361.6	2483	4482	3857	1987	1958	2850	2846	3307	3311
B0361.8	2188	5328	4282	4569	4287	5028	4006	7150	6813
B0361.9	740	968	851	1302	2424	142	448	207	96
B0365.10	0	0	0	0	4	0	0	10	9
B0365.9	38	42	63	37	133	23	0	0	0
B0379.1	65	113	124	82	319	14	21	27	105
B0379.10	0	6	5	3	2	2	3	39	24
B0379.12	0	0	3	0	2	0	4	0	0
B0379.13	0	2	0	0	1	0	7	63	10
B0379.2	0	0	0	0	8	0	0	0	0
B0379.6	0	0	19	30	4	18	18	75	53
B0379.7	0	0	0	6	0	0	0	0	0
B0379.9	0	5	12	25	13	5	11	23	19
B0391.14	296	84	186	0	9	51	55	12	0
B0391.3	0	0	0	0	0	0	0	1	0
B0393.10	13	6	2	0	6	0	0	0	0
B0393.12	0	6	0	1	0	0	0	1	0
B0393.15	0	0	0	0	1	0	0	0	0
B0393.3	63087	97033	62171	12643	26952	10053	39469	13474	18860
B0393.4	0	22	29	119	305	0	0	27	0
B0393.5	10	2377	1688	687	1728	140	729	14	46
B0393.6	1387	2155	1809	1710	2118	1560	1866	3121	3625
B0393.7	0	11	0	42	65	0	0	0	34
B0393.9	73	16	38	113	211	46	64	206	113
B0395.10	0	0	0	0	3	2	0	0	0
B0395.3	787	2072	1293	774	1043	604	90	71	1
B0403.10	0	0	3	4	0	0	0	5	0
B0403.11	0	0	0	1	1	7	0	0	0
B0403.3	0	0	0	0	7	6	0	48	0
B0403.5	0	0	0	0	0	0	0	4	0
B0403.6	0	31	0	0	19	0	0	0	48
B0403.8	0	0	0	0	2	0	0	2	0
B0403.9	3	0	7	3	9	0	0	0	0
B0410.1	0	0	0	0	0	5	8	0	0
B0410.3	0	0	33	12	5	0	24	0	0
B0412.6	32	3	5	3	0	11	2	7	14
B0412.7	7	33	8	1	1	17	5	4	14
B0416.10	0	0	0	24	34	0	0	0	0
B0416.3	0	0	0	0	21	9	0	0	0
B0416.4	192	357	154	27	35	166	259	0	0
B0416.5	5718	6576	5422	8585	14121	2246	3081	54	51
B0416.7	0	0	0	2	11	0	0	0	0
B0416.8	0	5	0	0	0	0	0	0	0
B0416.9	0	6	0	0	4	0	0	1	0
B0432.1	0	33	19	4	19	22	56	2	0
B0432.10	1666	1764	1115	1306	1243	1792	1177	2776	2556
B0432.11	0	25	0	0	0	42	0	0	0
B0432.13	2881	3908	2785	4015	3496	3505	2529	3875	5518
B0432.14	18	26	9	2	3	33	14	38	38
B0432.17	0	0	0	1	11	10	0	7	0
B0432.19	0	0	0	5	1	1	0	0	0
B0432.6	308	298	409	178	140	510	497	351	362
B0432.7	491	217	264	189	154	196	380	324	479
B0432.8	395	790	504	510	665	422	321	485	531
B0432.9	131	117	117	422	417	195	113	353	257
B0454.13	0	1	0	0	0	3	1	14	0
B0454.26	0	0	0	0	0	6	0	0	0
B0454.5	0	0	0	0	0	2	0	2	0
B0454.6	0	55	37	0	0	23	28	1	0
B0454.8	0	0	8	0	0	9	0	2	0
B0454.9	54	11	15	73	67	81	26	40	31
B0457.11	0	0	1	0	0	0	0	23	23
B0457.12	21	0	6	0	0	0	13	42	81
B0457.13	0	0	0	0	0	1	0	1	16
B0457.15	0	0	0	0	0	0	0	5	6
B0457.16	0	6	0	0	0	0	7	8	9
B0457.17	0	0	1	0	0	0	6	66	33
B0457.18	0	0	0	0	0	1	0	39	29
B0457.19	0	0	0	20	1	4	25	11	30
B0457.2	0	0	105	55	142	19	8	8	20
B0457.4	0	31	10	2	23	0	0	15	0
B0457.6	0	0	31	10	20	10	13	0	0
[truncated: 21,813 more rows]
