# Supplementary material for: Nanos promotes epigenetic reprograming of the germline by down-regulation of the THAP transcription factor LIN-15B
Source: eLife. 2017 Nov 7;6:e30201. doi: 10.7554/eLife.30201 (PMC5734877; doi:10.7554/eLife.30201)
Supplement: Supplementary file 10. [file elife-30201-supp10.xlsx]

## Sheet: Sheet1
Supplementary table S10
Name	Sequence	Description
oCYL668	AAATTCAAGCCATTTGAGTTTTTGTTCTTCTTGAAAGCGATCGAAGATCCAATTTCTCAATACTTTTTTATATCGGGTCCAA	for nos-2 deletion
oCYL977	CCAAAAAGAAAAAGATACAAGGAAAAAAGGGGATAATCTACTTTCCCATGAGACGTGGTCCGAGCTCGTTGGCGAATCCGGATCCTCCTCCATTAGAAGATGGTATATCTCGTTGGCGATTTTTCCATTC	for mes-3 C'ter OLLAS tag
gBLOCK4	ctcaataaaggttgtatatttattcatcttattgaatctgccatttcctcgtttttgcgagtttatataccttccaattttctttctattgtattttcaacttctaattttaattcagggaaactgcttcaacgcatcATGCAAACCttgAAGACCGCCagattgACCagcAAtCCAGCCagcATCCCAACCagcTCC	gpd-2/3: 138nt, recoded first 20 amino acid of LIN-15B
