# Supplementary figures and images for: Nanos promotes epigenetic reprograming of the germline by down-regulation of the THAP transcription factor LIN-15B
Source: eLife journal article supplement (doi:10.7554/elife.30201), 2017-11-07

Figure 5-figure supplement 1.

A

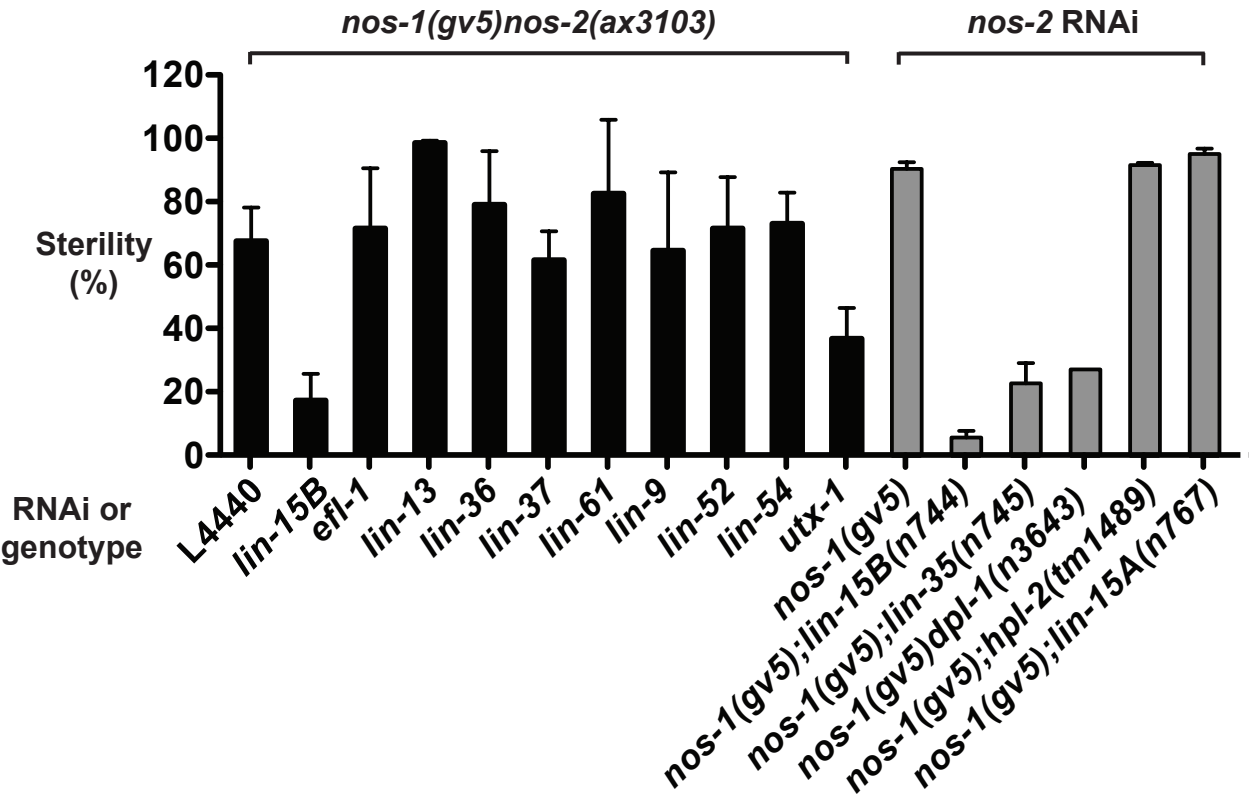

Supplement: supp [file elife-30201-supp-v1.zip]

Figure 1-figure supplement 1.

A

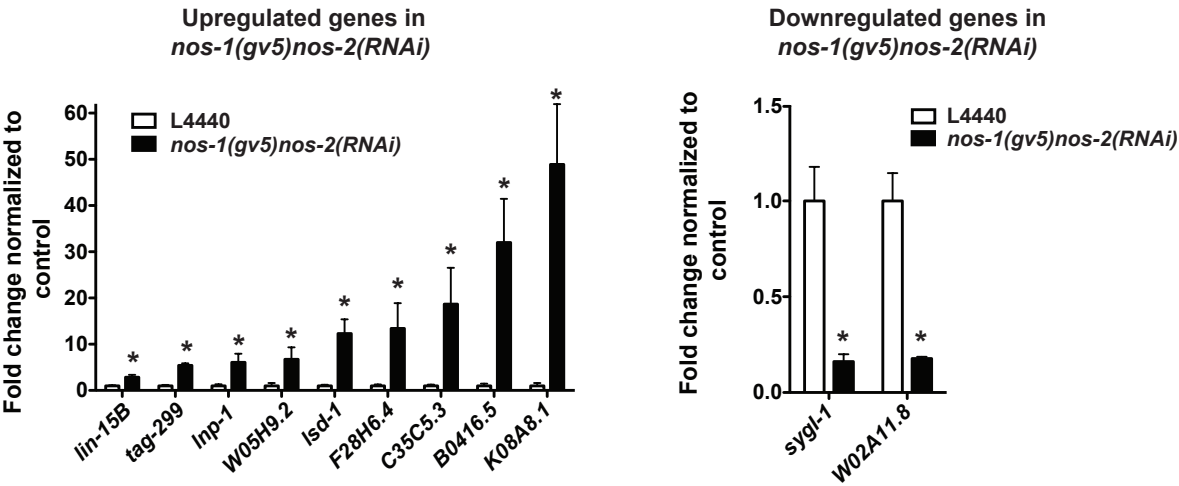

B

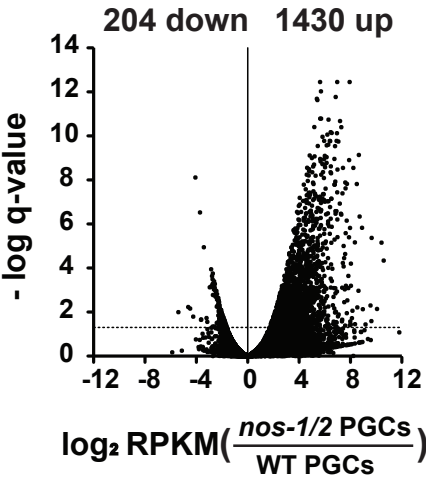

C

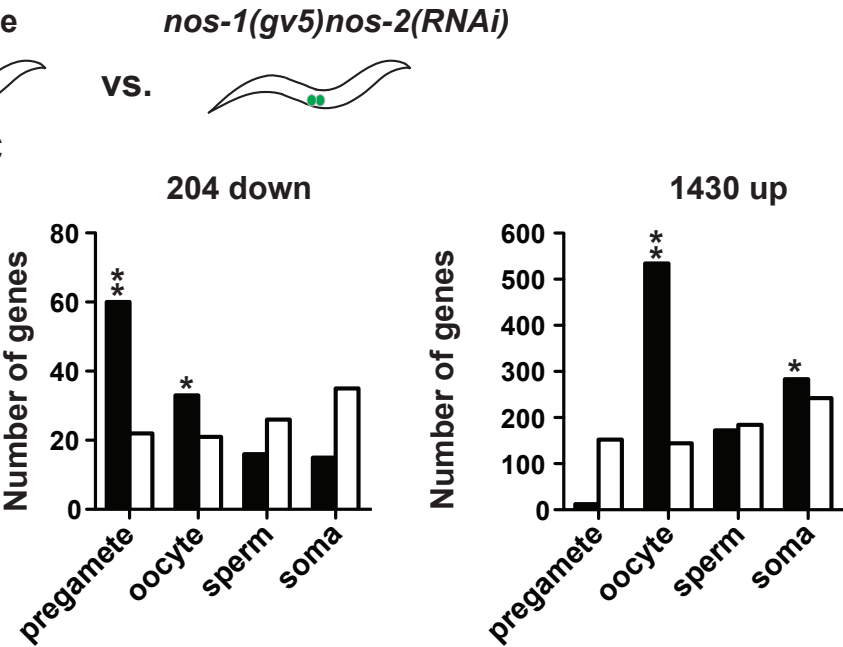

D

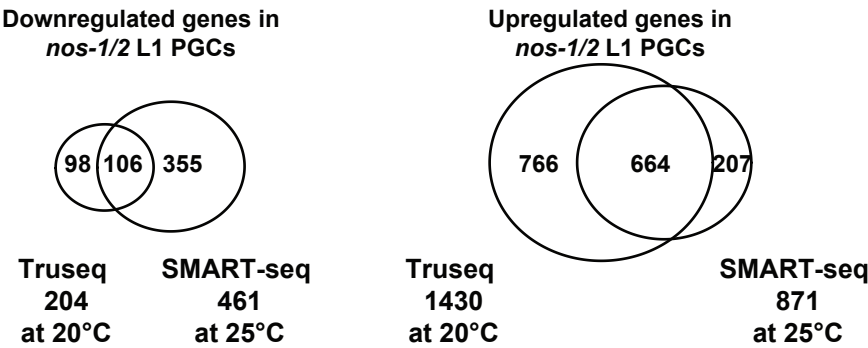

Supplement: supp [file elife-30201-supp-v1.zip]

Figure 5-figure supplement 2.

A

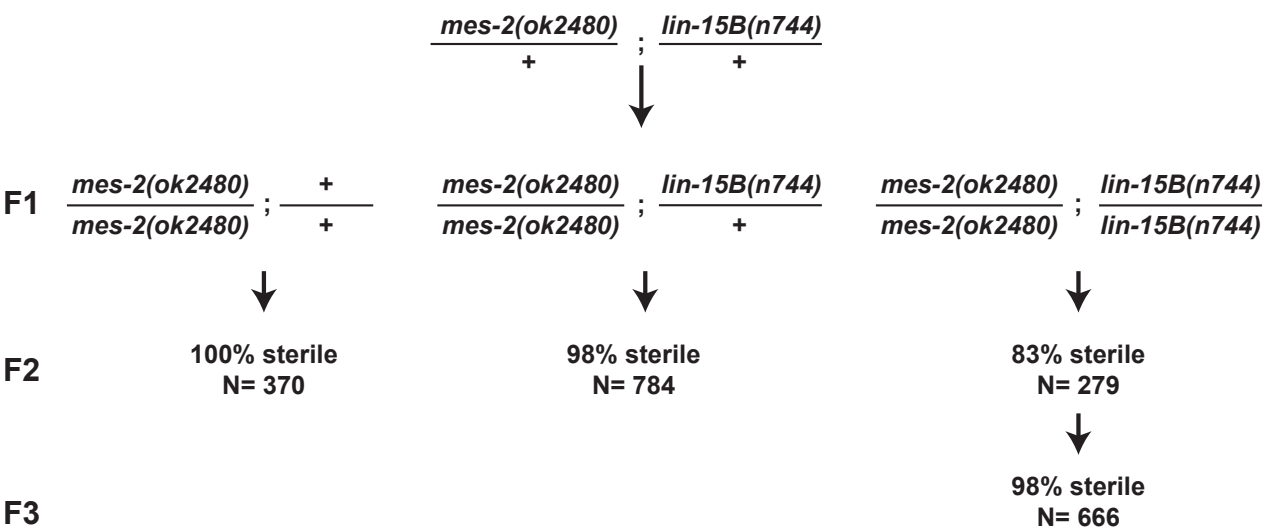

B

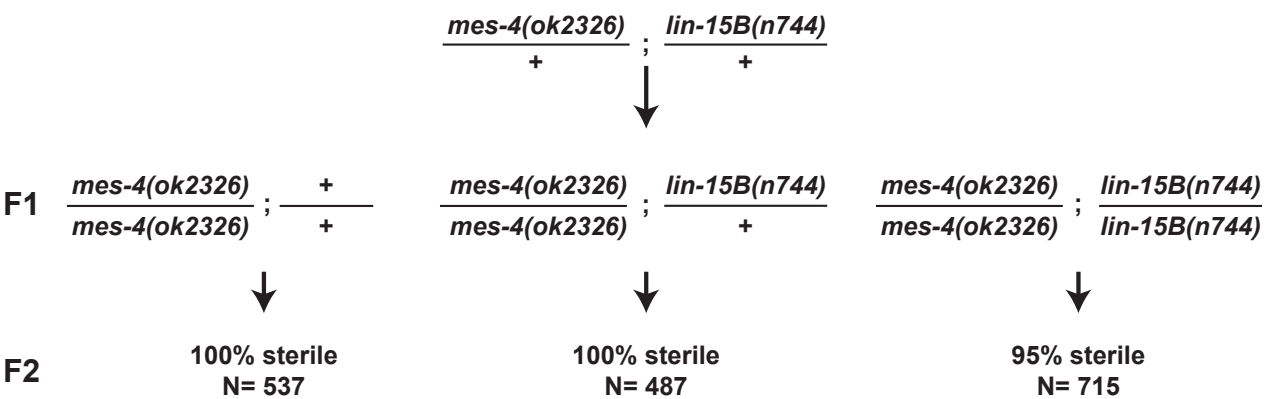

Supplement: supp [file elife-30201-supp-v1.zip]

Figure 4-figure supplement 1.

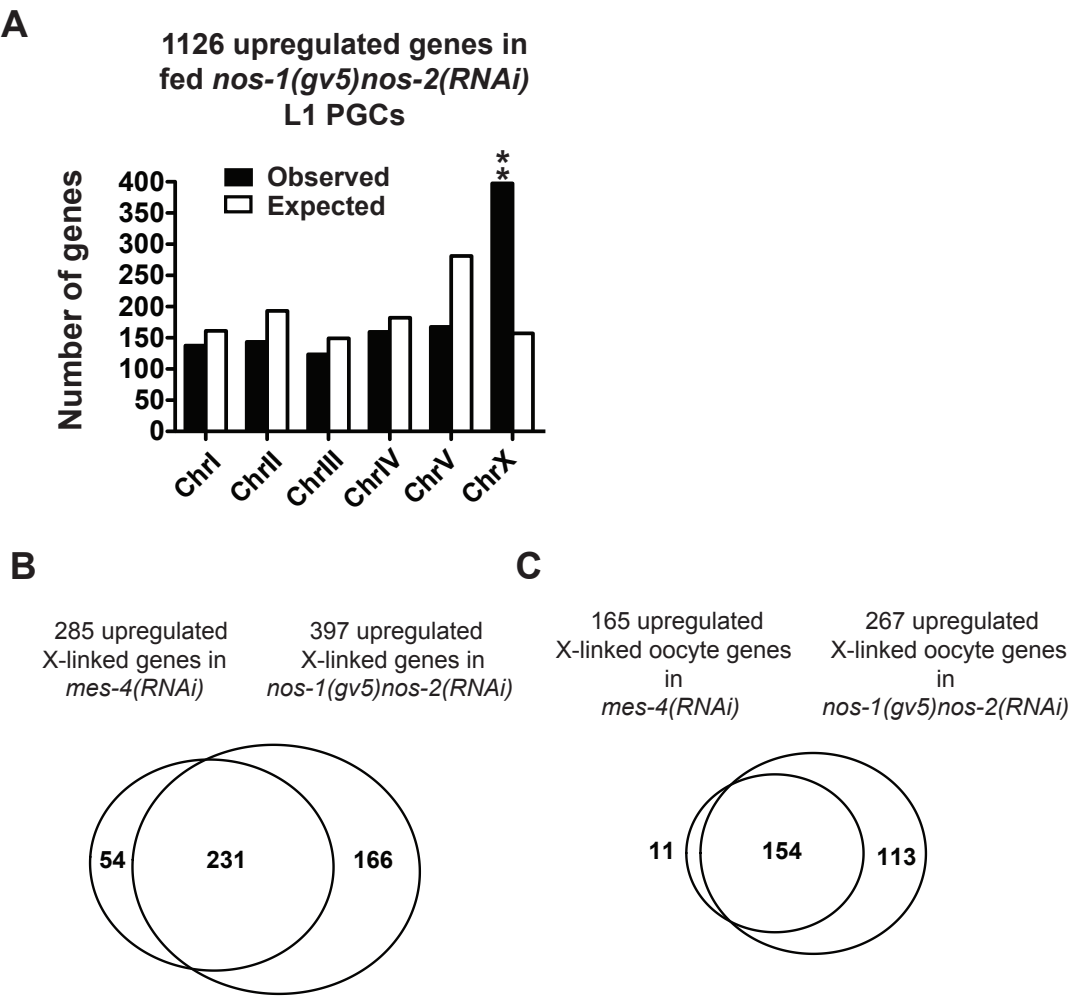

Supplement: supp [file elife-30201-supp-v1.zip]

Figure 3-figure supplement 1.

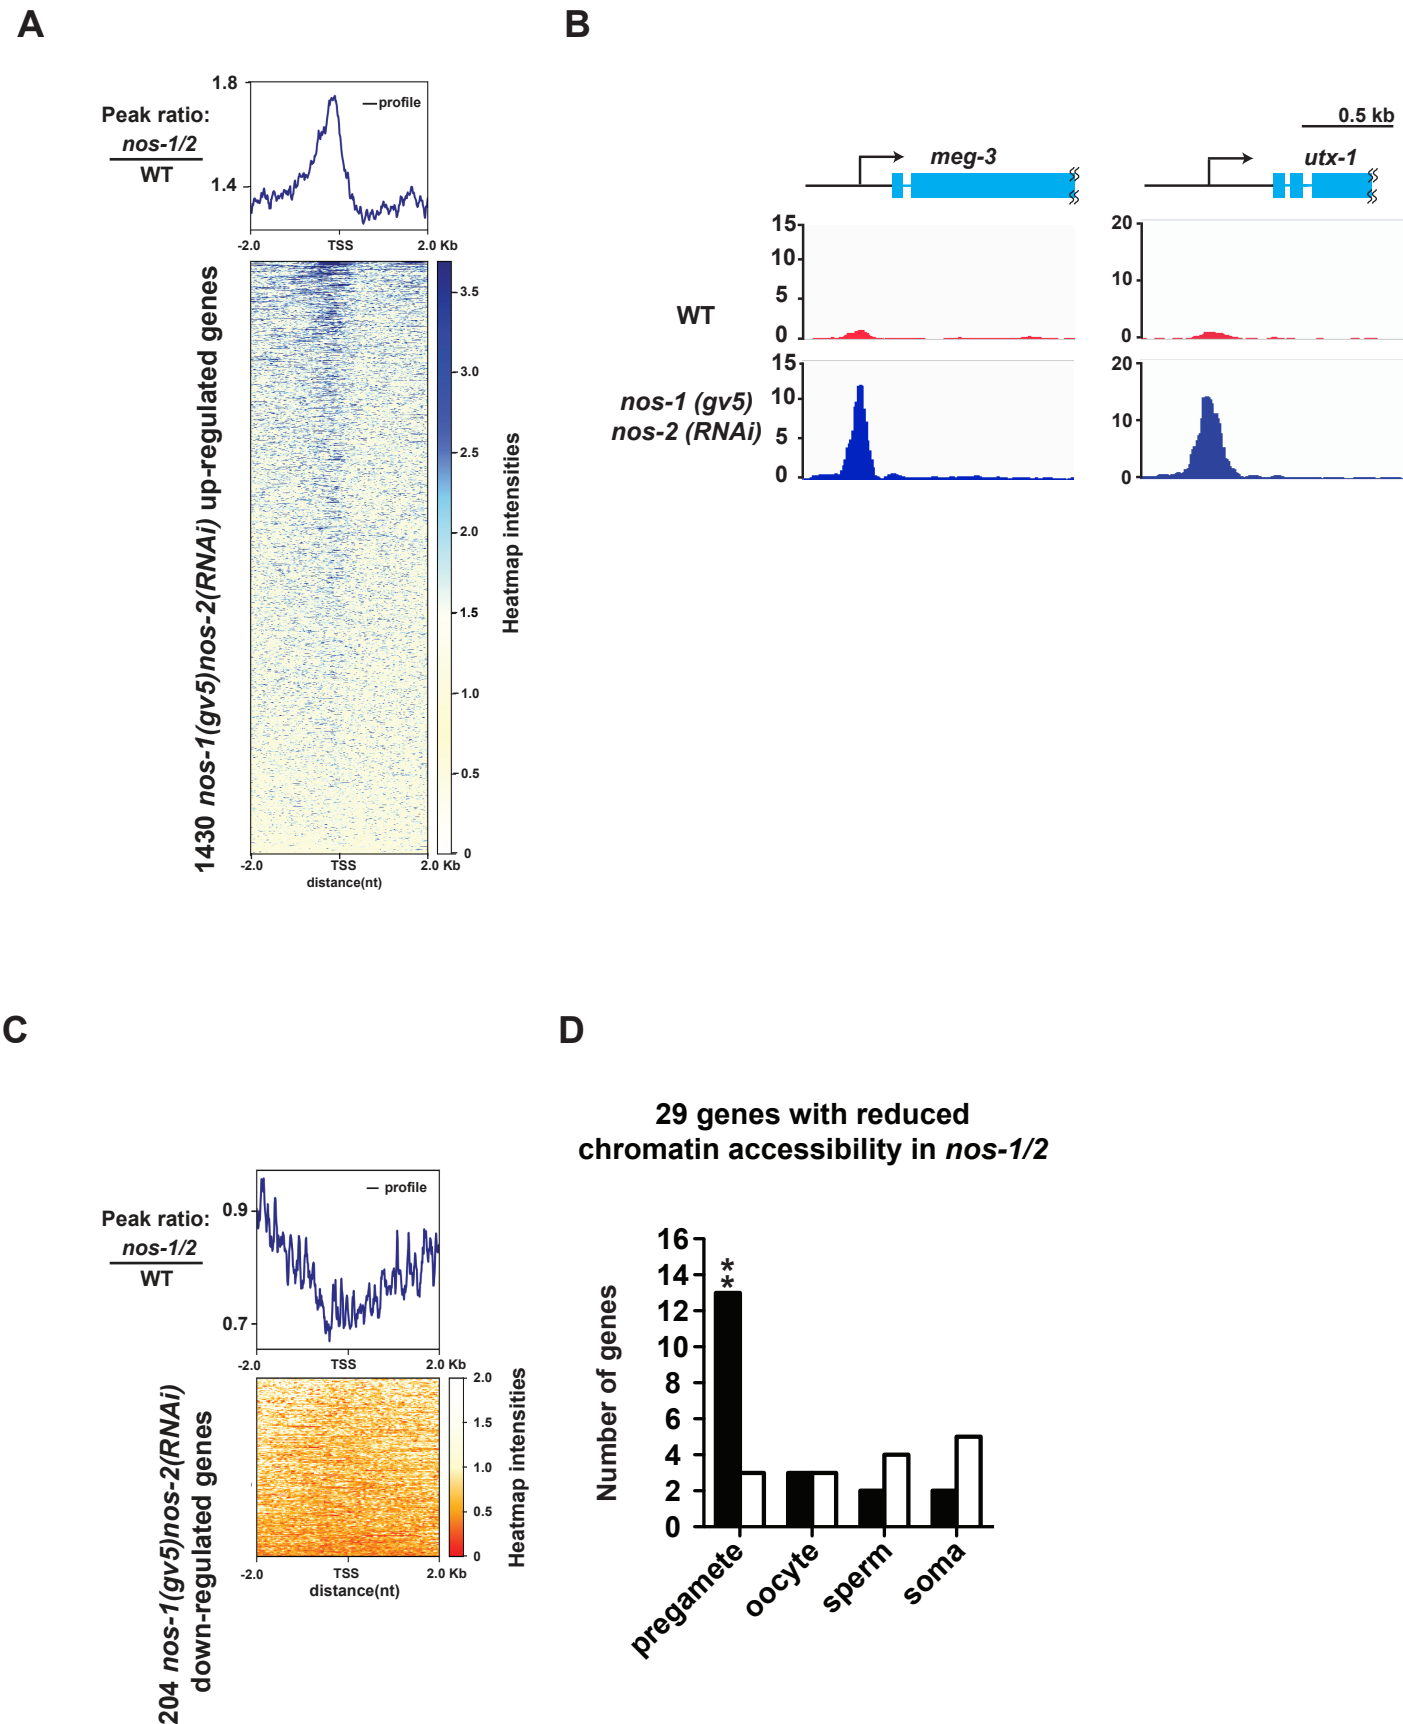

Supplement: supp [file elife-30201-supp-v1.zip]

Figure 6-figure supplement 2 .

A

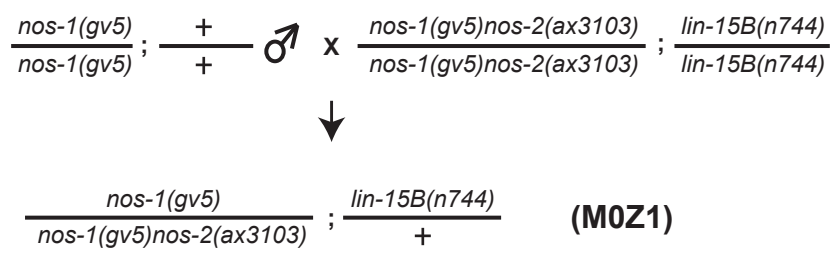

B

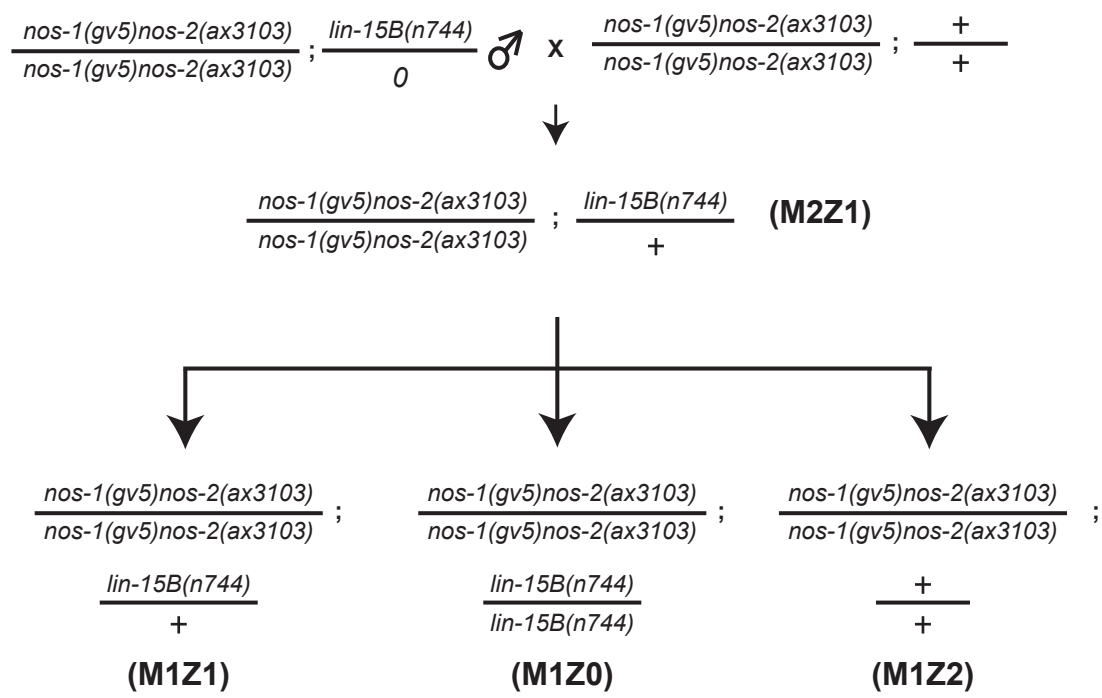

Supplement: supp [file elife-30201-supp-v1.zip]

Figure 3-figure supplement 2.

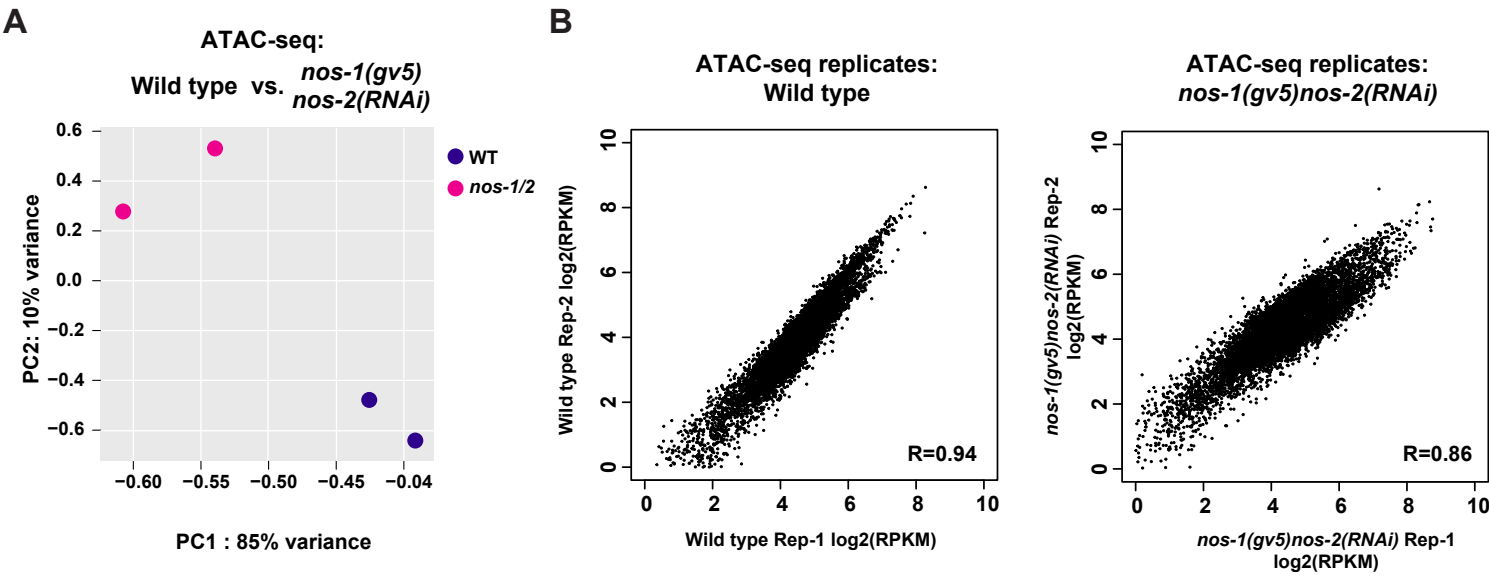

Supplement: supp [file elife-30201-supp-v1.zip]

Figure 4-figure supplement 2.

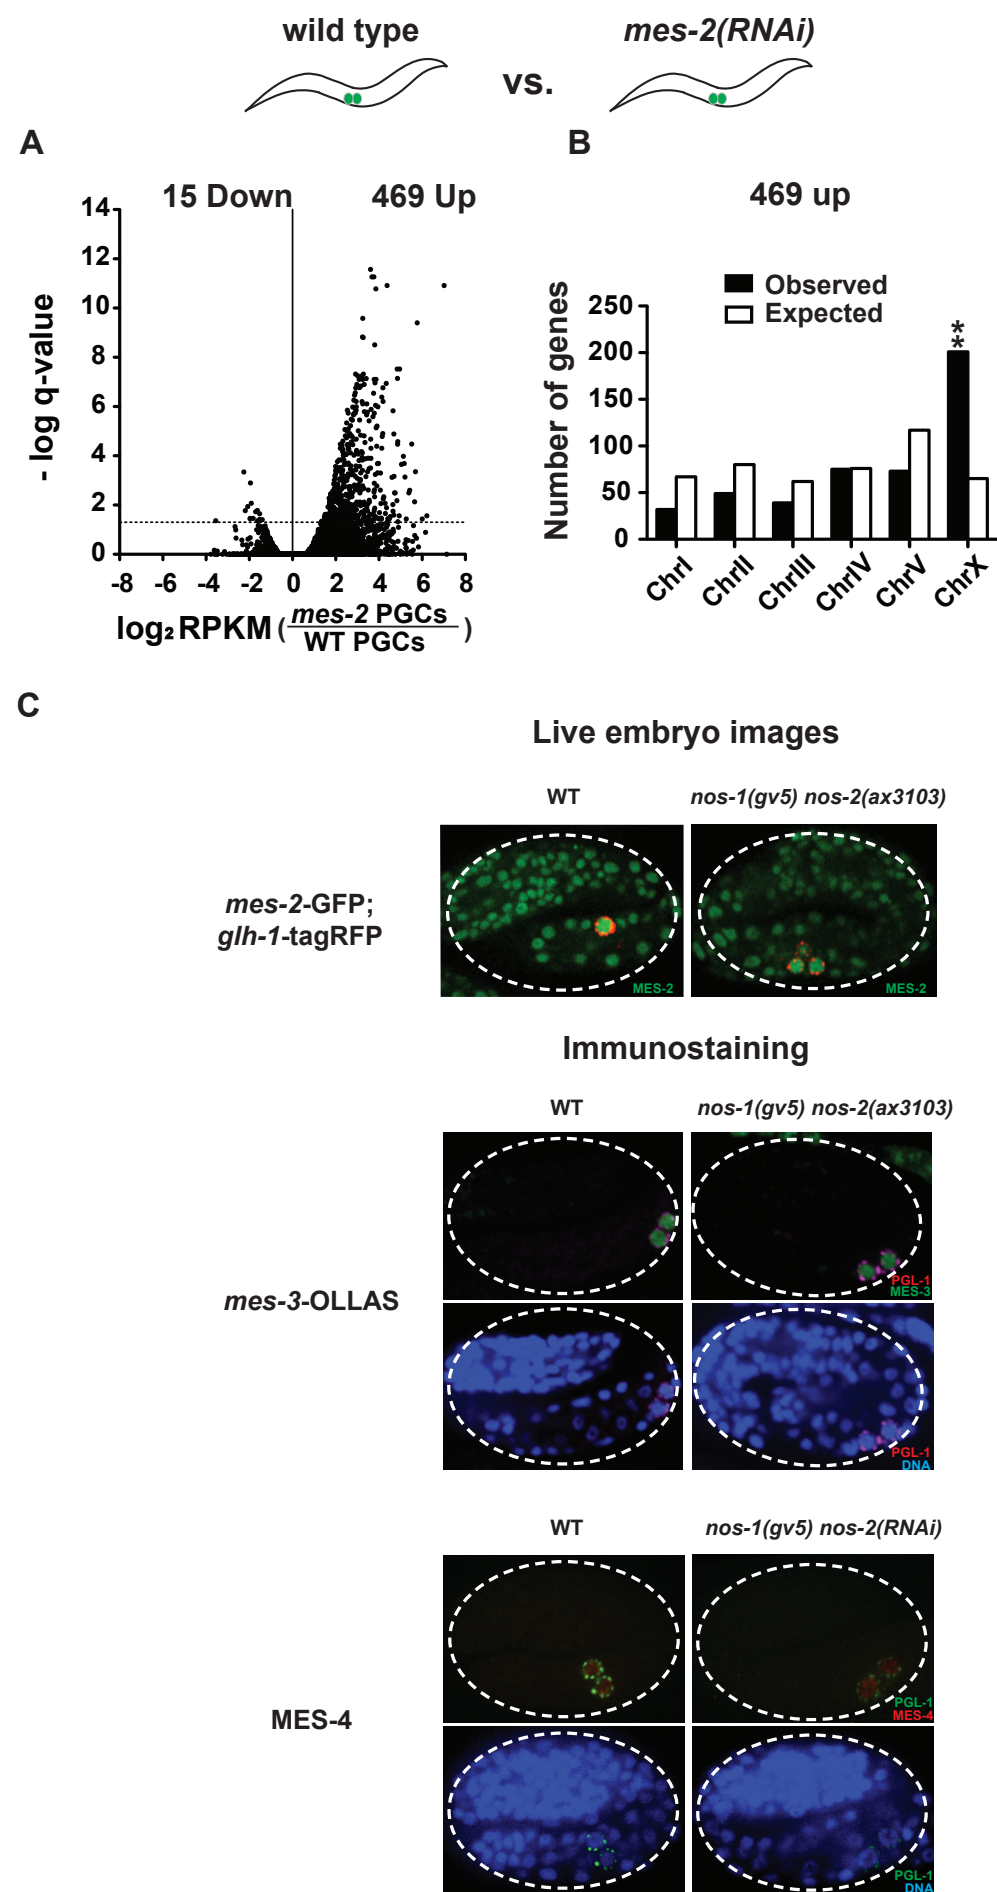

Supplement: supp [file elife-30201-supp-v1.zip]

Figure 6-figure supplement 3.

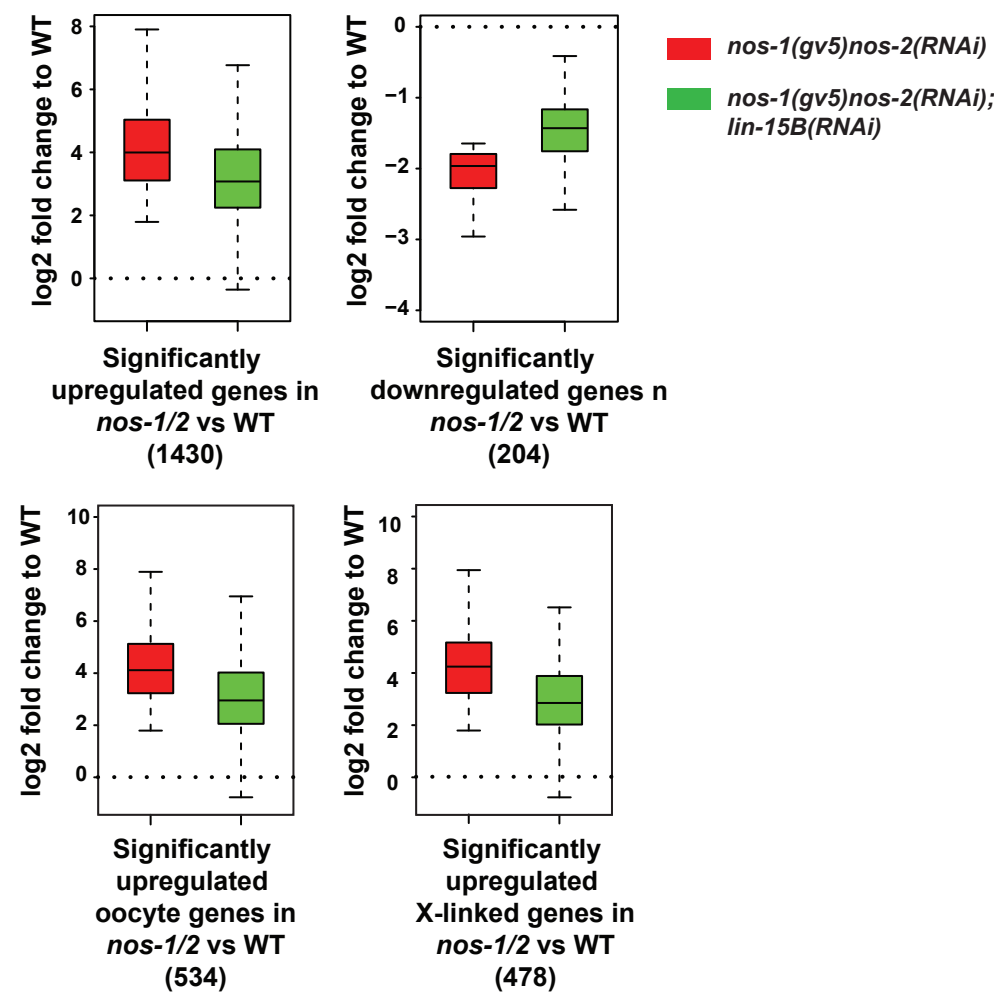

Supplement: supp [file elife-30201-supp-v1.zip]

Figure 2-figure supplement 1.

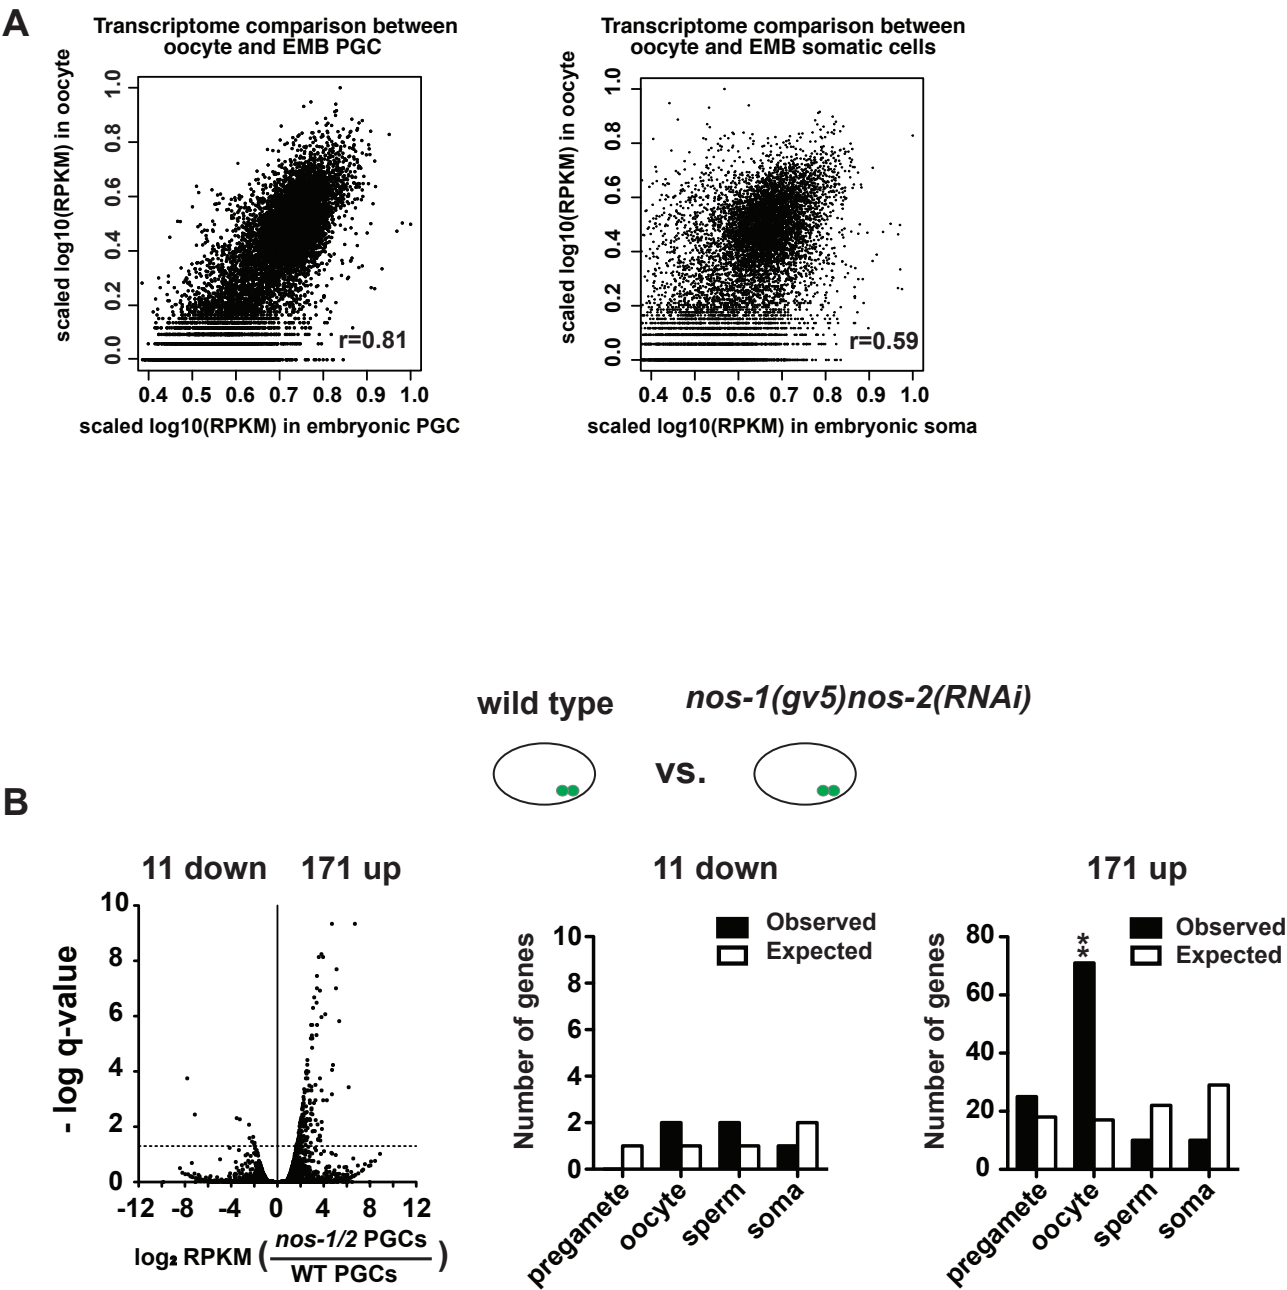

Supplement: supp [file elife-30201-supp-v1.zip]

Figure 2-figure supplement 2.

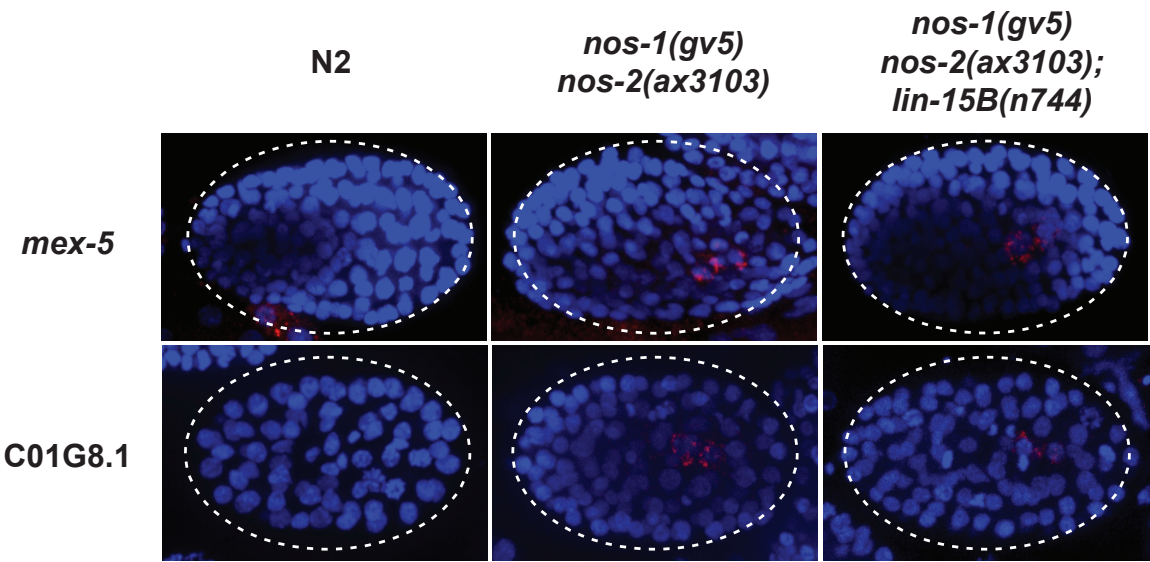

Supplement: supp [file elife-30201-supp-v1.zip]

Figure 6-figure supplement 1.

A

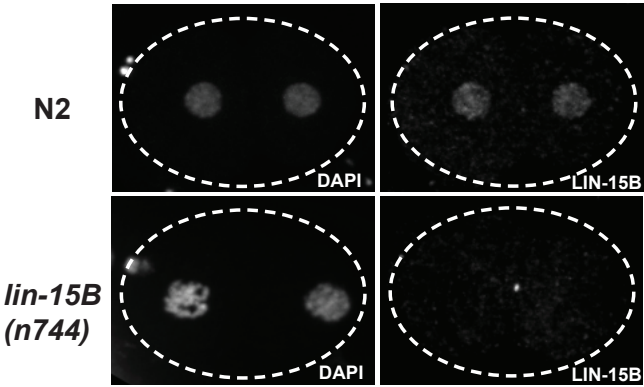

B

*lin-15B*prom::GFP-H2B reporter

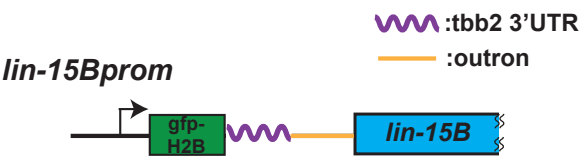

C

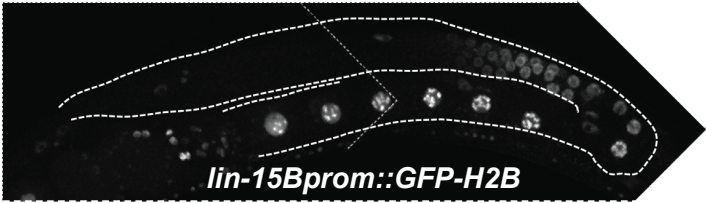

Supplement: supp [file elife-30201-supp-v1.zip]

Figure 5-figure supplement 3.

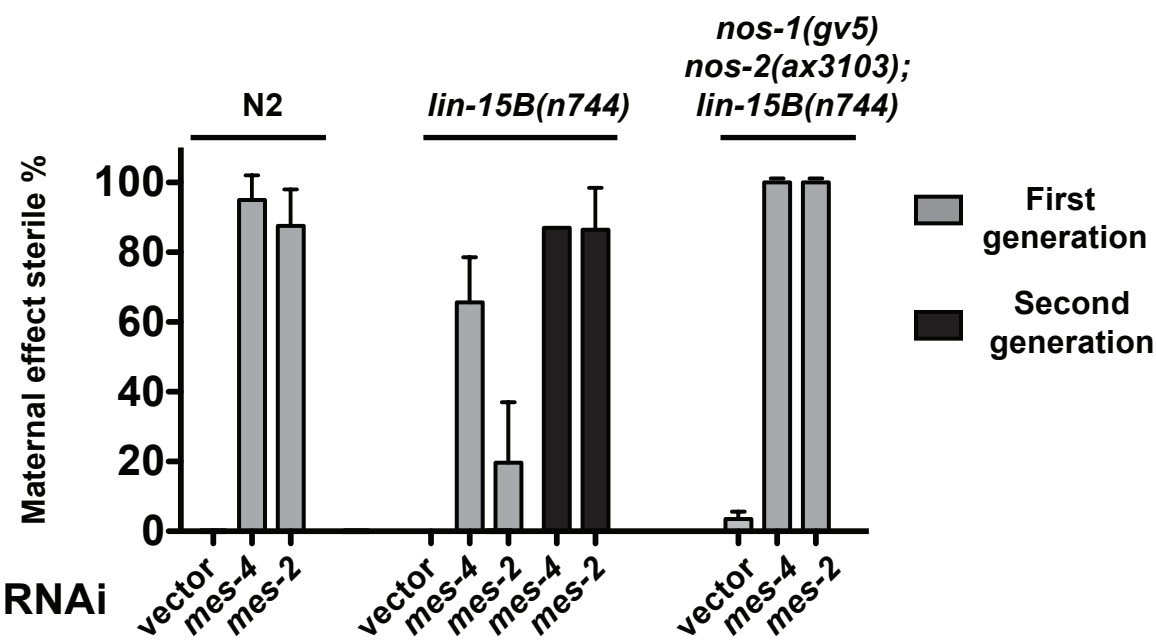

Supplement: supp [file elife-30201-supp-v1.zip]
